# Supplementary material for: Decoding the function of bivalent chromatin in development and cancer
Source: HighWire-hosted journal article supplement (doi:10.1101/gr.275736.121), 2021-10-19
Supplement: Supplemental_Table_S1.xlsx [file Supplemental_Table_S1.xlsx]

## Sheet: Human_RefSeq_hESC
Supplemental Table 1. Chromatin states and dinucleotide frequencies of human gene promoters
No	RefSeq Accession	Gene Coordinates (hg19)				Gene Symbol	Chromatin State	H3K4me3 signal (RPM)	H3K4me3 Fold over Input	H3K27me3 signal (RPM)	H3K27me3 Fold over Input	Dinucleotide Frequency at the promoter (+/-500 bp of TSS)
		Chr	Start	End	Strand							AA	AT	AG	AC	TA	TT	TG	TC	GA	GT	GG	GC	CA	CT	CG	CC
27750	NR_046018	chr1	11873	14409	+	DDX11L1	Unmarked	0	10	2.667	0.533	47	52	61	41	39	95	103	60	52	63	74	70	63	87	20	72
28024	NR_024540	chr1	14361	29370	-	WASH7P	Unmarked	0	10	0.333	10	25	3	86	31	12	17	50	43	72	40	186	127	36	61	104	106
28135	NM_001005484	chr1	69090	70008	+	OR4F5	Unmarked	0	10	0	0	74	94	60	44	73	124	78	73	64	50	41	35	60	81	11	37
27929	NR_039983	chr1	134772	140566	-	LOC729737	Unmarked	0	10	1	0.6	56	58	84	44	37	77	88	65	65	60	71	55	83	72	9	75
27130	NR_033908	chr1	700244	714068	-	LOC100288069	H3K4me3-only	106	21.2	5	0.556	51	27	80	44	31	32	73	45	56	57	100	110	65	65	69	94
27851	NR_103536	chr1	752750	755214	+	FAM87B	Unmarked	1	0.5	2	0.4	108	56	77	63	47	68	70	57	70	40	55	57	79	78	20	54
26214	NR_024321	chr1	761585	762902	-	LINC00115	H3K4me3-only	89	53.389	6.667	1.818	23	12	48	55	12	31	39	78	47	43	81	111	56	74	114	175
26132	NR_047520	chr1	762970	794826	+	LOC643837	H3K4me3-only	86.667	51.99	7	1.909	30	15	69	44	12	27	55	50	72	54	168	114	43	48	116	82
26212	NR_047525	chr1	763177	794826	+	LOC643837	H3K4me3-only	64	10	6.667	1.818	35	39	55	40	38	57	56	56	54	59	133	102	41	52	104	78
10336	NR_027055	chr1	803450	812182	-	FAM41C	Unmarked	1.333	0.571	23	1.917	49	30	85	55	29	26	86	53	64	56	114	67	77	82	17	109
1852	NR_026874	chr1	852952	854817	-	LOC100130417	H3K27me3-only	4.333	0.765	213.667	8.781	15	20	77	49	10	25	100	52	60	58	129	93	77	84	34	116
285	NM_152486	chr1	861120	879961	+	SAMD11	Bivalent	25.333	3.455	731	29.636	18	10	68	29	9	31	60	53	66	50	189	120	32	62	108	94
3690	NM_015658	chr1	879582	894679	-	NOC2L	Bivalent	200.333	60.106	90	6.923	20	17	58	31	10	42	65	60	56	53	146	123	40	65	110	103
3159	NM_198317	chr1	895966	901099	+	KLHL17	Bivalent	122.667	30.667	112.333	6.127	19	7	97	18	9	16	27	48	91	26	229	126	23	51	118	94
2352	NM_032129	chr1	901876	910484	+	PLEKHN1	Bivalent	51	8.053	163.334	7.778	24	7	72	41	8	18	74	54	59	53	146	108	53	76	74	132
4444	NR_027693	chr1	910578	917473	-	C1orf170	H3K27me3-only	2	0.5	68	3.709	26	19	90	54	11	14	70	53	68	44	134	95	84	71	47	119
779	NM_001142467	chr1	934343	935552	-	HES4	Bivalent	86.667	37.148	425.666	20.935	29	16	69	38	6	11	32	44	72	30	155	133	45	36	134	149
6791	NM_005101	chr1	948846	949919	+	ISG15	H3K4me3-only	89.333	10.72	36.333	1.363	58	33	77	39	24	55	90	55	54	66	107	82	71	69	35	84
9193	NM_198576	chr1	955502	991499	+	AGRN	H3K4me3-only	144.333	43.304	25.666	1.638	13	7	48	25	4	12	35	57	50	33	164	141	26	56	140	188
6674	NM_001205252	chr1	1007125	1009687	-	RNF223	Unmarked	3	0.474	37.333	2.24	21	19	93	58	16	14	81	32	57	51	138	103	97	59	36	124
4106	NM_017891	chr1	1017197	1051736	-	C1orf159	Bivalent	108.333	40.635	76	4.851	30	8	60	38	10	18	40	45	60	41	141	140	36	46	140	146
5924	NR_038869	chr1	1072396	1079434	+	LOC254099	H3K4me3-only	25	10.716	44	2.87	22	8	59	40	5	30	75	41	54	48	194	107	48	64	76	128
8715	NR_029639	chr1	1102483	1102578	+	MIR200B	Unmarked	0.667	0.2	27	1.421	19	15	84	53	8	12	56	48	63	33	145	102	81	64	57	159
11421	NR_029834	chr1	1103242	1103332	+	MIR200A	Unmarked	1.667	0.417	21.333	1.164	17	11	83	47	6	18	62	50	56	39	148	103	79	68	54	158
12421	NR_029957	chr1	1104384	1104467	+	MIR429	Unmarked	2.666	0.615	20	0.938	29	24	80	54	13	24	65	51	50	36	120	97	96	69	38	153
7495	NM_001130045	chr1	1109285	1133313	+	TTLL10	H3K4me3-only	18	3.857	32	1.92	19	12	82	45	8	22	74	55	56	52	160	98	75	74	50	117
15093	NM_153254	chr1	1115076	1121243	+	TTLL10	Unmarked	2.333	0.412	17.333	1.106	25	23	78	54	6	10	65	49	60	33	135	95	89	64	46	167
3692	NM_004195	chr1	1138887	1142089	-	TNFRSF18	Bivalent	29	6.693	90	4.737	26	19	60	49	11	30	73	49	55	48	150	101	62	66	70	130
13930	NM_003327	chr1	1146705	1149548	-	TNFRSF4	Unmarked	3	0.692	18.333	0.902	23	14	69	52	13	20	87	53	49	52	131	104	74	87	49	122
10267	NM_016176	chr1	1152287	1167447	-	SDF4	H3K4me3-only	171.333	30.233	23.333	1.029	17	12	48	38	6	15	40	46	45	34	144	167	48	46	158	135
9508	NM_080605	chr1	1167628	1170420	+	B3GALT6	H3K4me3-only	114.667	20.234	24.667	1.104	15	11	43	38	4	12	55	37	48	28	136	184	41	57	162	128
3933	NM_001014980	chr1	1177825	1182102	-	FAM132A	Bivalent	18.333	3.667	81.334	5.192	12	9	75	22	4	19	61	54	61	42	180	131	40	69	98	122
7743	NM_194457	chr1	1189291	1209234	-	UBE2J2	H3K4me3-only	235.333	70.607	31	1.121	13	9	56	35	6	21	45	59	52	38	148	139	42	63	128	145
16969	NR_037668	chr1	1215815	1227409	+	SCNN1D	Unmarked	1.667	0.556	16	0.906	81	45	93	53	39	45	57	53	68	46	90	70	83	58	34	84
7187	NM_030649	chr1	1227763	1243269	-	ACAP3	H3K4me3-only	175	65.617	33.667	1.578	12	9	36	37	0	27	56	53	41	51	152	150	40	50	150	135
7433	NM_153339	chr1	1243993	1247057	+	PUSL1	H3K4me3-only	224.667	168.542	32.333	1.764	27	11	54	35	11	19	45	47	49	46	168	147	39	46	144	111
19094	NM_001256463	chr1	1246964	1260067	-	CPSF3L	H3K4me3-only	268.667	73.286	14.333	0.672	5	10	62	30	9	23	53	57	55	49	132	130	38	60	118	168
18284	NM_001029885	chr1	1260142	1264276	+	GLTPD1	H3K4me3-only	275.333	68.833	15	0.682	21	10	55	49	7	7	38	58	51	32	148	134	56	62	123	148
7022	NM_152228	chr1	1266725	1269844	+	TAS1R3	Unmarked	2	0.316	35	1.029	34	20	72	43	11	21	90	52	46	43	132	112	78	89	40	116
15704	NM_004421	chr1	1270657	1284492	-	DVL1	H3K4me3-only	175	40.388	17	0.981	11	17	40	29	9	13	39	45	43	37	170	169	34	40	170	133
7690	NM_032348	chr1	1288070	1293915	-	MXRA8	Unmarked	9.333	1.75	31	1.661	24	12	87	40	9	29	75	52	69	50	179	85	61	74	41	112
15089	NM_001127229	chr1	1309109	1310580	-	AURKAIP1	H3K4me3-only	243.667	34.81	17.333	0.684	35	18	58	42	18	52	57	49	66	51	152	100	34	54	103	110
15298	NM_017900	chr1	1309109	1310818	-	AURKAIP1	H3K4me3-only	177.333	24.183	17.333	0.675	34	25	58	43	24	57	50	57	61	46	137	100	41	61	99	106
15124	NM_001127230	chr1	1309110	1310562	-	AURKAIP1	H3K4me3-only	246.667	33.638	17.333	0.684	36	17	59	42	17	42	56	48	67	50	158	103	34	53	106	111
8961	NM_030937	chr1	1321090	1334718	-	CCNL2	H3K4me3-only	329.667	65.933	26.333	0.888	15	19	59	43	11	20	47	53	54	39	134	135	56	53	122	139
9442	NR_015434	chr1	1334909	1337426	+	LOC148413	H3K4me3-only	355.667	46.389	25	0.893	24	21	58	48	14	22	58	61	63	48	108	115	51	64	109	135
10926	NM_017971	chr1	1337275	1342693	-	MRPL20	H3K4me3-only	425.333	60.762	22	0.957	39	20	53	55	11	31	52	52	53	43	101	122	63	52	113	139
7474	NM_001145210	chr1	1353799	1356824	-	ANKRD65	Unmarked	7	1.235	32.333	1.47	34	18	98	40	12	37	69	53	63	39	119	86	81	77	21	152
9354	NM_001146685	chr1	1361507	1363167	+	TMEM88B	Unmarked	11.666	2.188	25	0.987	18	11	83	42	7	24	90	42	61	44	158	106	68	84	38	123
6935	NM_022834	chr1	1370902	1378262	+	VWA1	H3K4me3-only	103	9.967	35.333	1.262	11	11	50	27	7	21	85	67	44	66	140	131	36	82	107	114
17963	NM_001039211	chr1	1385068	1405538	+	ATAD3C	Unmarked	0.333	0.071	15.333	1.15	56	51	40	44	40	102	76	134	48	56	46	35	47	143	24	57
22927	NM_031921	chr1	1407163	1431582	+	ATAD3B	H3K4me3-only	214.333	45.925	11	0.647	37	24	51	41	21	43	49	53	53	50	127	122	42	49	124	113
22590	NM_018188	chr1	1447522	1470067	+	ATAD3A	H3K4me3-only	192.333	44.388	11.333	0.919	24	12	52	35	9	23	52	51	54	38	144	151	36	61	139	118
23632	NM_001170536	chr1	1447909	1470067	+	ATAD3A	H3K4me3-only	91.667	24.998	10.333	0.795	27	15	65	35	17	40	64	46	49	60	141	136	49	51	116	88
11409	NM_001114748	chr1	1470157	1475740	-	TMEM240	H3K4me3-only	102.333	23.617	21.333	0.853	8	14	46	28	6	9	36	62	53	19	146	135	28	72	125	212
15549	NM_014188	chr1	1477052	1510262	-	SSU72	H3K4me3-only	394.333	40.792	17	0.718	38	21	57	40	14	26	53	57	56	53	116	129	48	50	128	113
2281	NM_001242659	chr1	1533387	1535476	-	C1orf233	Bivalent	78.667	15.733	168	7.2	16	5	40	33	9	8	52	34	34	36	123	188	36	54	165	166
12059	NM_001170688	chr1	1550794	1565990	+	MIB2	H3K4me3-only	256.667	32.083	20.333	0.859	47	14	68	30	11	17	55	64	55	49	122	130	46	66	112	113
11099	NM_001170689	chr1	1551244	1565990	+	MIB2	H3K4me3-only	272.333	62.851	21.667	0.823	9	8	44	32	6	11	54	57	38	47	158	154	39	62	141	139
3404	NM_006983	chr1	1567559	1570030	+	MMP23B	Bivalent	49	12.25	101.667	9.242	12	12	59	34	5	28	70	55	43	45	145	116	57	73	75	170
26811	NM_033488	chr1	1571099	1655775	-	CDK11B	H3K4me3-only	88.667	53.19	5.667	1.133	42	22	84	42	21	49	54	71	60	63	98	101	66	62	86	78
27368	NM_001110781	chr1	1592938	1624243	-	SLC35E2B	H3K4me3-only	48.667	36.509	4.666	1.167	40	10	42	41	11	23	74	50	42	55	131	128	39	70	110	133
26834	NM_033529	chr1	1634169	1655791	-	CDK11A	H3K4me3-only	82.667	49.59	5.667	1.133	45	24	82	43	21	46	53	73	59	63	98	100	68	60	87	77
27721	NM_001199787	chr1	1656276	1677438	-	SLC35E2	H3K4me3-only	75.333	112.943	3	1.8	43	10	39	38	12	35	76	52	37	59	129	128	38	71	110	122
10542	NM_001198994	chr1	1682670	1711508	-	NADK	H3K4me3-only	66.334	11.056	22.667	0.819	68	41	78	64	38	49	84	54	62	56	82	65	83	79	21	75
12588	NM_001198993	chr1	1682670	1710297	-	NADK	H3K4me3-only	178.333	29.722	20	0.833	20	11	50	42	11	17	51	52	36	47	140	138	56	56	120	152
14452	NM_023018	chr1	1682670	1709909	-	NADK	H3K4me3-only	243.667	60.917	18	0.818	9	11	43	37	7	10	53	48	39	43	168	152	45	54	139	141
16159	NM_001198995	chr1	1682670	1690081	-	NADK	Unmarked	1.667	0.455	16.666	0.847	28	22	83	46	23	64	103	33	64	64	136	96	64	73	38	62
13600	NM_002074	chr1	1716724	1822526	-	GNB1	H3K4me3-only	173.333	173.333	19	1.14	6	6	52	32	7	17	41	39	51	44	156	147	32	37	149	183
12079	NM_138705	chr1	1846265	1848733	+	CALML6	Unmarked	3.667	0.55	20.333	1.017	27	29	79	36	8	40	99	55	55	54	122	89	81	79	20	126
6190	NM_178545	chr1	1849028	1850740	-	TMEM52	H3K4me3-only	79.333	18.309	41.333	1.908	11	11	46	29	12	26	87	42	33	67	189	132	41	63	99	111
8180	NM_001080484	chr1	1884751	1935276	-	KIAA1751	H3K4me3-only	39	6.5	29	1.673	63	30	62	45	21	49	67	53	57	51	89	84	58	61	63	146
3313	NM_000815	chr1	1950767	1962192	+	GABRD	Bivalent	65	21.667	105.333	4.647	11	5	57	25	1	12	51	51	52	41	164	147	34	57	132	159
7943	NM_002744	chr1	1981908	2116834	+	PRKCZ	H3K4me3-only	196.333	84.155	30	1.475	8	13	59	22	4	24	37	54	53	45	147	145	37	37	148	166
22026	NM_001033581	chr1	2005085	2116834	+	PRKCZ	Unmarked	2.333	0.368	12	0.537	20	24	67	37	10	42	85	60	48	54	108	116	70	77	66	115
21742	NM_001242874	chr1	2005424	2116834	+	PRKCZ	Unmarked	1.333	0.25	12.333	0.569	24	30	67	26	10	48	102	52	62	61	133	112	51	74	66	81
20357	NM_001033582	chr1	2036154	2116834	+	PRKCZ	Unmarked	3	0.563	13.666	0.695	32	25	95	45	16	43	81	52	74	59	137	83	74	65	41	77
5197	NM_001146310	chr1	2115898	2139172	-	C1orf86	H3K27me3-only	3.333	0.909	54	3.24	34	19	78	74	8	22	66	52	53	39	112	100	110	67	48	117
10560	NR_046424	chr1	2120987	2144159	-	C1orf86	H3K4me3-only	43	6.45	22.666	1.097	46	15	71	47	11	37	64	58	53	24	107	109	69	95	50	143
15913	NM_182533	chr1	2120987	2126214	-	C1orf86	H3K4me3-only	107.667	40.37	17	0.879	19	17	49	36	11	38	43	57	43	27	155	112	48	67	90	187
8609	NM_003036	chr1	2160133	2241652	+	SKI	H3K4me3-only	153.667	65.867	27.333	1.491	8	11	46	21	3	17	40	34	46	25	168	196	29	41	182	132
14472	NM_024848	chr1	2252695	2322993	-	MORN1	H3K4me3-only	248.333	67.739	18	0.964	29	10	67	40	9	18	33	55	50	22	130	149	59	64	121	143
10703	NR_024489	chr1	2281852	2284100	-	LOC100129534	Unmarked	1.333	0.222	22.333	1.117	37	30	86	56	24	41	73	62	57	34	76	91	90	96	23	123
14299	NM_007033	chr1	2323213	2336885	+	RER1	H3K4me3-only	234.667	70.407	18	0.915	13	10	59	22	9	24	51	50	54	44	169	148	28	56	136	126
8147	NM_153818	chr1	2336240	2344010	-	PEX10	H3K4me3-only	255.667	69.74	29	1.243	15	8	60	35	5	11	54	54	40	44	113	148	58	61	118	175
11547	NM_014638	chr1	2407753	2436964	+	PLCH2	Unmarked	0.333	0.077	21.333	1.391	16	17	75	27	9	22	92	59	55	52	176	96	55	91	36	121
2478	NM_018216	chr1	2439974	2458035	-	PANK4	Bivalent	110.667	20.751	154.333	7.848	30	31	73	38	25	26	51	47	53	35	150	133	65	57	97	88
1220	NM_001010926	chr1	2460183	2461684	-	HES5	Bivalent	21.667	5	312.667	15.899	28	22	67	25	13	28	53	48	44	36	106	149	56	57	109	158
21882	NR_026927	chr1	2481358	2484284	-	LOC115110	Unmarked	0.667	0.667	12.333	1.194	25	16	78	57	6	26	61	75	54	42	122	84	90	85	41	137
11276	NR_037844	chr1	2487207	2488450	-	LOC100133445	Unmarked	1.667	0.385	21.666	1.032	26	23	97	53	6	10	81	43	83	38	144	92	85	69	34	115
11333	NM_003820	chr1	2487804	2495267	+	TNFRSF14	Unmarked	3.333	0.714	21.333	1	25	19	74	39	8	41	73	75	57	41	118	88	67	97	38	139
18134	NR_036637	chr1	2517898	2522908	+	FAM213B	H3K4me3-only	165	41.25	15.333	0.852	34	29	65	42	14	22	44	37	70	24	166	121	52	42	106	131
17096	NM_152371	chr1	2518188	2522908	+	FAM213B	H3K4me3-only	182.667	45.667	16	0.906	19	17	64	36	6	11	58	29	65	32	205	142	46	44	117	108
6281	NM_033467	chr1	2522080	2564481	-	MMEL1	Unmarked	1.666	0.227	40.333	1.704	43	16	94	48	14	35	68	56	58	41	103	80	86	82	17	158
11930	NM_001242672	chr1	2572806	2706230	-	TTC34	Unmarked	2.667	0.889	20.666	1.292	24	23	50	40	15	32	80	43	54	39	129	145	44	76	107	98
13363	NM_080431	chr1	2938045	2939467	+	ACTRT2	Unmarked	1	0.333	19	1.462	40	28	94	47	23	49	78	55	75	36	116	80	70	92	20	96
388	NR_015440	chr1	2976180	2984289	-	LINC00982	Bivalent	17.667	6.624	639.333	40.81	30	18	74	39	12	29	62	51	66	34	114	119	53	74	83	141
533	NM_022114	chr1	2985741	3355185	+	PRDM16	Bivalent	32.333	32.333	539.333	49.03	56	21	72	26	12	21	44	39	75	39	165	126	31	35	125	112
10473	NR_036215	chr1	3044538	3044599	+	MIR4251	Unmarked	3	0.692	22.667	1.063	48	40	76	40	22	64	81	67	68	49	103	70	66	81	29	95
10304	NM_014448	chr1	3371146	3397677	+	ARHGEF16	H3K4me3-only	67.667	20.302	23	0.945	22	9	69	39	2	24	44	46	61	23	151	135	54	60	106	154
3996	NM_001409	chr1	3404505	3528059	-	MEGF6	Bivalent	105.667	28.816	79	3.485	13	11	71	25	8	24	73	40	68	49	219	124	31	61	97	85
14943	NR_030277	chr1	3477259	3477354	-	MIR551A	Unmarked	0.667	0.118	17.666	0.964	35	23	94	45	19	33	80	52	74	45	112	80	69	84	25	129
8395	NM_182752	chr1	3541555	3546694	+	TPRG1L	H3K4me3-only	179	44.75	28	1.474	25	16	59	34	4	14	45	47	54	45	181	136	51	36	130	122
1504	NM_017818	chr1	3547330	3566671	-	WRAP73	Bivalent	139	34.75	260	16.595	55	58	67	51	61	57	55	38	42	51	115	91	72	45	63	78
457	NM_001204186	chr1	3569128	3652765	+	TP73	Bivalent	102.333	30.703	586.667	27.5	27	8	72	31	9	11	38	42	65	24	170	149	37	57	127	132
7550	NM_001204189	chr1	3607235	3652765	+	TP73	Unmarked	2	0.6	31.667	1.759	27	28	67	43	16	35	71	60	52	45	126	97	71	74	55	132
6219	NM_001204192	chr1	3614609	3652765	+	TP73	Unmarked	4.333	1.182	41	2.365	23	31	72	43	15	30	96	66	52	54	129	90	79	92	29	98
10769	NR_033712	chr1	3652547	3663335	-	TP73-AS1	H3K4me3-only	215.667	29.41	22.333	0.918	29	22	50	57	20	35	64	66	53	48	104	95	56	81	81	138
11367	NR_033711	chr1	3652547	3663937	-	TP73-AS1	H3K4me3-only	139	52.118	21.333	0.97	75	24	50	49	15	33	52	61	53	33	104	91	56	70	75	158
7189	NM_152492	chr1	3668964	3688209	+	CCDC27	Unmarked	2	0.6	33.667	2.061	45	37	76	58	20	75	63	78	51	36	69	76	101	87	24	103
6785	NM_001163724	chr1	3689351	3692546	+	SMIM1	H3K4me3-only	72.667	27.247	36.333	1.677	13	6	56	38	12	25	60	48	41	31	125	123	47	83	79	212
17206	NM_020710	chr1	3696783	3713068	-	LRRC47	H3K4me3-only	258.667	55.425	16	0.828	40	19	60	41	17	35	78	52	45	34	97	143	58	93	84	103
7409	NM_014704	chr1	3728644	3773797	-	CEP104	H3K4me3-only	230.333	32.905	32.666	1.607	25	9	70	37	12	20	64	43	44	42	148	142	60	69	94	120
7419	NM_004402	chr1	3773844	3801993	+	DFFB	H3K4me3-only	235.333	33.619	32.666	1.581	20	9	72	38	11	23	62	41	48	39	133	140	59	66	93	145
20098	NM_207356	chr1	3805696	3816857	-	C1orf174	H3K4me3-only	204.333	36.057	13.666	0.745	55	20	63	55	12	17	59	51	50	37	143	107	76	65	71	118
21207	NR_024455	chr1	3816967	3832011	+	LOC100133612	H3K4me3-only	178	35.6	12.667	0.704	17	23	64	36	12	62	82	48	51	57	109	109	60	62	72	135
10409	NR_040065	chr1	4000671	4012643	+	LOC728716	Unmarked	2.667	0.8	23	1.438	67	36	82	53	24	36	80	70	65	47	76	71	82	91	20	99
19367	NR_027088	chr1	4472110	4484744	+	LOC284661	Unmarked	1.333	0.235	14.333	0.935	54	42	70	46	30	97	92	74	66	61	65	60	62	94	25	61
1120	NM_001042478	chr1	4715104	4837854	+	AJAP1	Bivalent	63.667	21.222	332.667	17.509	16	11	60	26	3	12	40	39	59	25	132	185	34	46	170	141
11417	NR_039612	chr1	5624130	5624203	+	MIR4417	Unmarked	1	0.2	21.333	1.231	40	48	66	55	27	76	66	86	49	50	89	49	93	81	17	107
20862	NR_039838	chr1	5922731	5922801	-	MIR4689	Unmarked	1.333	0.364	13	0.736	29	39	69	36	28	67	108	67	54	70	80	85	62	93	33	79
4725	NM_015102	chr1	5922869	6052533	-	NPHP4	H3K4me3-only	178	41.08	62	2.776	15	16	53	32	11	32	60	62	51	55	154	126	38	63	119	112
5240	NM_001199861	chr1	6052357	6161253	+	KCNAB2	H3K4me3-only	154.333	35.618	53.333	2.623	38	16	77	54	12	11	36	36	68	29	141	128	67	39	111	136
8001	NM_003636	chr1	6086072	6161253	+	KCNAB2	Unmarked	10.333	2.067	29.667	1.099	25	22	80	49	11	24	69	67	50	46	111	103	89	79	50	124
5654	NM_001199860	chr1	6094347	6161253	+	KCNAB2	Unmarked	14.333	1.483	47.333	1.578	36	24	68	40	13	39	109	69	51	63	101	87	68	105	24	102
11553	NM_001199862	chr1	6105980	6161253	+	KCNAB2	Unmarked	1.333	0.4	21.333	1.123	54	37	80	51	30	49	82	51	69	57	93	72	68	70	36	100
11106	NM_001199863	chr1	6106173	6161253	+	KCNAB2	Unmarked	1.666	0.625	21.667	1.161	55	33	74	54	24	62	83	56	68	54	83	74	70	76	39	94
1572	NM_015557	chr1	6161846	6240194	-	CHD5	Bivalent	44.667	13.401	251	12.55	14	10	49	26	6	15	52	38	47	33	198	162	32	53	140	124
12311	NM_000983	chr1	6245079	6259679	-	RPL22	H3K4me3-only	307	40.042	20	0.698	45	29	67	36	28	59	57	60	59	40	129	94	45	76	69	106
2257	NM_207396	chr1	6266188	6281359	+	RNF207	Bivalent	75.333	28.246	170	8.095	19	15	83	31	15	16	56	56	62	42	127	126	52	69	92	138
18132	NM_012405	chr1	6281252	6296044	-	ICMT	H3K4me3-only	220.667	66.207	15.333	0.939	21	17	51	34	16	44	51	64	30	37	130	151	56	77	117	103
16953	NR_103534	chr1	6296299	6299502	+	LINC00337	H3K4me3-only	132.333	30.541	16	0.873	57	20	68	41	14	27	63	39	60	39	100	136	55	57	104	119
4317	NM_001024598	chr1	6304251	6305638	+	HES3	Bivalent	184	34.502	71	3.043	48	35	98	36	24	23	71	58	80	52	167	69	65	66	32	75
3675	NM_207370	chr1	6307405	6321035	-	GPR153	Bivalent	116.667	50.007	91	3.957	9	7	66	30	7	12	35	41	58	25	180	150	38	52	132	157
6404	NM_007274	chr1	6324331	6453826	-	ACOT7	H3K4me3-only	145.333	48.444	39.333	2.035	24	24	48	36	14	48	48	61	33	31	114	140	61	68	107	142
9351	NM_181864	chr1	6324331	6445883	-	ACOT7	Unmarked	13.667	1.952	25	0.937	19	26	78	32	19	56	100	58	59	65	137	83	58	85	29	95
15167	NM_181865	chr1	6324331	6420764	-	ACOT7	Unmarked	2.333	0.437	17.333	0.776	38	50	73	34	37	83	96	53	68	57	134	64	52	78	20	62
15639	NM_181866	chr1	6324331	6419004	-	ACOT7	Unmarked	4.667	0.667	17	0.739	20	26	88	31	21	52	92	60	59	45	127	95	65	103	18	97
414	NM_019089	chr1	6475293	6479979	-	HES2	Bivalent	51.333	11.847	619	27.717	28	12	65	38	9	16	45	49	54	28	175	133	52	64	105	126
491	NM_031475	chr1	6484847	6521004	+	ESPN	Bivalent	22	3.143	568.333	17.577	23	14	54	43	5	22	60	56	46	36	123	146	60	71	114	126
7390	NR_036218	chr1	6489893	6489956	-	MIR4252	Unmarked	2.333	0.583	32.667	1.96	29	28	87	52	11	24	65	79	50	47	97	79	106	80	23	142
5515	NM_148970	chr1	6521213	6526255	-	TNFRSF25	H3K4me3-only	25	5.357	49	2.07	29	17	76	33	24	40	68	54	55	49	144	106	47	80	67	110
3315	NM_001042663	chr1	6526151	6557484	-	PLEKHG5	Bivalent	97.333	20.856	105.333	4.716	27	13	58	32	6	22	53	64	47	40	144	120	49	70	96	158
3407	NM_001265592	chr1	6526151	6557156	-	PLEKHG5	Bivalent	85.333	23.271	101.667	4.485	34	15	68	28	9	26	45	61	60	33	154	103	43	66	83	171
6245	NM_001265593	chr1	6526151	6545529	-	PLEKHG5	H3K4me3-only	135	81.032	41	1.732	11	12	65	23	10	18	59	48	53	47	217	110	38	58	85	145
6257	NM_001042665	chr1	6526151	6546014	-	PLEKHG5	H3K4me3-only	65.333	32.666	40.667	1.821	17	10	94	15	8	19	73	47	71	65	245	88	40	53	57	97
7687	NM_020631	chr1	6526151	6551761	-	PLEKHG5	H3K4me3-only	29.333	4.19	31.333	1.343	55	32	109	36	25	38	82	42	85	57	139	68	67	60	18	86
8696	NM_001265594	chr1	6526151	6550654	-	PLEKHG5	H3K4me3-only	156.667	58.743	27	1.125	21	26	64	32	25	37	53	65	57	47	142	90	39	70	77	154
8783	NM_001042664	chr1	6526151	6550640	-	PLEKHG5	H3K4me3-only	156	58.493	26.667	1.143	21	26	62	32	25	37	53	67	56	49	139	89	39	70	79	155
12929	NM_198681	chr1	6526151	6580121	-	PLEKHG5	Unmarked	7	1.313	19.333	0.841	80	30	99	39	27	44	87	39	66	50	106	93	75	73	23	68
16070	NM_024654	chr1	6581406	6614658	-	NOL9	H3K4me3-only	205.333	43.997	16.667	0.862	46	27	59	40	23	60	60	59	58	47	109	100	45	68	87	111
18548	NM_177540	chr1	6615337	6639817	+	TAS1R1	Unmarked	8.667	1.083	15	0.849	57	34	70	48	27	73	82	65	46	49	73	79	78	92	22	104
9820	NM_005341	chr1	6640050	6649340	+	ZBTB48	H3K4me3-only	189.333	21.845	24	0.935	28	22	64	40	15	28	66	71	53	54	125	101	58	77	77	120
7181	NM_014851	chr1	6650783	6662929	-	KLHL21	H3K4me3-only	265	66.25	33.667	1.629	27	9	62	38	11	24	58	40	52	36	126	158	46	65	125	122
12581	NM_153812	chr1	6673755	6684093	+	PHF13	H3K4me3-only	183.667	55.106	20	1.25	16	10	56	48	8	15	27	63	48	29	85	131	58	59	124	222
21541	NM_001195753	chr1	6684924	6693642	+	THAP3	H3K4me3-only	67.333	8.417	12.666	0.567	38	24	72	41	21	68	70	53	56	49	104	94	60	71	58	120
18804	NM_138350	chr1	6685209	6695646	+	THAP3	H3K4me3-only	150	21.429	14.666	0.629	33	12	73	40	12	36	67	38	54	49	143	118	59	56	81	128
9517	NM_018198	chr1	6694227	6761966	-	DNAJC11	H3K4me3-only	208.333	29.762	24.667	1.057	51	15	74	46	16	23	57	41	64	44	129	117	55	54	95	118
18363	NM_015215	chr1	6845383	7829766	+	CAMTA1	H3K4me3-only	110.667	36.889	15	0.776	27	20	53	33	8	28	46	42	63	40	201	125	35	36	130	112
17710	NM_004781	chr1	7831328	7841492	+	VAMP3	H3K4me3-only	212.667	42.533	15.666	0.746	33	24	47	58	18	33	55	62	55	40	94	106	55	72	99	148
5591	NM_016831	chr1	7844762	7905237	+	PER3	Bivalent	44.333	12.09	48	3.429	43	18	75	34	10	32	59	47	78	47	153	109	38	51	101	104
22891	NM_006786	chr1	7907671	7913104	-	UTS2	Unmarked	2.667	0.286	11	0.532	93	88	60	42	75	147	65	75	54	45	34	34	61	82	8	36
24189	NM_021995	chr1	7907671	7913551	-	UTS2	Unmarked	1.666	0.156	9.666	0.509	74	75	65	49	59	119	81	64	57	49	42	54	73	79	15	44
2074	NM_001561	chr1	7975930	8003225	-	TNFRSF9	H3K27me3-only	5.666	1.214	189.666	10.537	86	58	92	52	51	72	84	53	76	63	62	50	74	67	13	46
19136	NM_007262	chr1	8021713	8045342	+	PARK7	H3K4me3-only	309	37.081	14.333	0.623	59	19	69	46	20	23	74	48	62	67	127	103	51	56	90	85
4446	NM_018948	chr1	8071778	8086393	-	ERRFI1	H3K4me3-only	153.667	28.814	68	2.4	22	17	69	29	11	15	38	50	61	28	150	154	43	54	137	121
12302	NM_001080397	chr1	8384389	8404227	+	SLC45A1	Unmarked	2.666	0.666	20.333	1.326	37	25	77	49	13	38	68	70	69	47	120	70	69	80	41	126
17172	NM_001042682	chr1	8412463	8483747	-	RERE	H3K4me3-only	153.333	41.814	16	0.738	21	12	52	27	10	46	64	48	50	46	175	122	31	65	101	129
20354	NM_001042681	chr1	8412463	8877699	-	RERE	H3K4me3-only	273	54.6	13.666	0.804	73	21	54	35	14	28	31	74	45	25	95	115	50	73	100	166
9863	NM_001428	chr1	8921058	8939151	-	ENO1	H3K4me3-only	148	22.199	24	0.986	35	22	82	48	20	25	44	52	73	42	138	108	58	52	98	102
11700	NM_001201483	chr1	8921058	8931635	-	ENO1	Unmarked	5.333	1.333	21	1.235	60	51	67	50	36	64	102	58	62	63	86	62	70	82	17	69
10971	NR_038351	chr1	8938893	8939943	+	ENO1-AS1	H3K4me3-only	257.667	45.468	22	0.93	25	14	53	40	12	19	56	57	51	41	118	129	44	70	112	158
10958	NM_001270501	chr1	9005892	9035148	+	CA6	Unmarked	1.667	0.238	22	1.119	41	44	73	42	28	79	100	59	55	64	79	73	77	79	18	88
19282	NM_207420	chr1	9063358	9086404	-	SLC2A7	Unmarked	1	0.25	14.333	0.935	71	36	97	37	21	44	86	56	77	53	112	72	72	74	19	72
20675	NM_001135585	chr1	9101426	9129887	-	SLC2A5	Unmarked	4.333	0.619	13.333	0.625	96	39	91	47	34	56	81	51	71	58	95	61	72	69	18	60
3562	NM_024980	chr1	9164475	9189229	-	GPR157	Bivalent	120.667	45.244	95.667	6.833	11	10	44	38	13	14	64	51	35	50	210	144	44	68	120	83
15632	NR_029610	chr1	9211726	9211836	-	MIR34A	Unmarked	0.667	0.154	17	1.062	62	39	84	40	39	78	86	53	60	63	83	72	65	75	25	75
8478	NM_004285	chr1	9294862	9331394	+	H6PD	H3K4me3-only	164.333	32.867	28	1.5	23	9	71	30	9	14	46	41	63	32	134	148	38	56	126	159
2695	NM_025106	chr1	9352940	9429590	+	SPSB1	Bivalent	109	54.5	138.667	8.49	17	4	52	35	5	29	32	46	50	22	196	149	36	57	138	131
12881	NM_032315	chr1	9599527	9642831	+	SLC25A33	H3K4me3-only	114.333	24.498	19.666	0.908	29	20	63	46	24	40	36	53	51	40	106	126	54	53	119	139
15278	NM_001010866	chr1	9648931	9665020	+	TMEM201	H3K4me3-only	146.333	24.389	17.333	0.812	18	8	50	35	15	16	50	38	46	30	125	163	31	65	140	169
2341	NM_005026	chr1	9711789	9789172	+	PIK3CD	Bivalent	78.667	16.856	164.333	9.481	36	14	68	25	18	44	73	47	49	45	132	136	40	79	89	104
3065	NR_027045	chr1	9712667	9714644	-	C1orf200	H3K27me3-only	2.333	0.538	116.667	5.469	69	36	68	57	24	74	76	61	54	48	78	72	83	77	30	92
3359	NM_001009566	chr1	9789078	9884550	-	CLSTN1	Bivalent	95.667	35.871	103.333	4.366	26	20	60	44	19	33	40	74	56	44	129	97	49	69	97	142
15797	NM_020248	chr1	9908333	9970316	-	CTNNBIP1	H3K4me3-only	169.667	63.617	17	1.02	7	8	40	38	8	20	44	61	29	24	90	157	49	81	126	217
18207	NM_032368	chr1	9989775	10002826	-	LZIC	H3K4me3-only	212.667	39.878	15	0.776	67	52	76	41	56	96	68	63	66	67	74	51	48	68	39	67
16838	NM_022787	chr1	10003485	10045556	+	NMNAT1	H3K4me3-only	243.333	36.498	16	0.906	66	30	71	52	27	63	55	60	77	40	106	67	50	72	58	105
1668	NM_052960	chr1	10057254	10076078	+	RBP7	Bivalent	77.667	23.302	237	12.696	40	31	71	43	27	29	51	62	59	52	89	96	59	57	85	148
19929	NM_001105562	chr1	10093040	10241296	+	UBE4B	H3K4me3-only	204	25.5	13.667	0.621	34	17	81	42	27	36	50	48	62	46	136	110	50	62	88	110
11613	NM_183416	chr1	10270763	10368655	+	KIF1B	H3K4me3-only	231.667	49.639	21	0.984	5	12	46	24	8	21	57	54	40	48	151	152	34	59	137	151
13044	NM_002631	chr1	10459084	10480201	+	PGD	H3K4me3-only	295	36.875	19.333	0.853	19	14	61	34	7	22	59	66	56	43	145	132	45	75	112	109
8076	NM_199294	chr1	10490158	10502872	+	APITD1	H3K4me3-only	97.333	12.167	29.333	1	59	38	68	55	30	43	84	50	63	61	100	88	68	65	61	66
8094	NM_198544	chr1	10490158	10512060	+	APITD1-CORT	H3K4me3-only	97.333	12.167	29.333	1	59	38	68	55	30	43	84	50	63	61	100	88	68	65	61	66
8188	NR_037187	chr1	10490803	10512060	+	APITD1-CORT	H3K4me3-only	210.667	37.174	29	1.225	34	27	62	37	17	41	56	62	58	49	131	116	50	59	105	95
8210	NR_036462	chr1	10490803	10502872	+	APITD1	H3K4me3-only	210.667	37.174	29	1.225	34	27	62	37	17	41	56	62	58	49	131	116	50	59	105	95
19578	NM_001302	chr1	10509775	10512060	+	CORT	Unmarked	2	0.4	14	0.712	83	47	92	45	34	59	70	53	67	41	75	79	83	69	25	77
18193	NM_004401	chr1	10520602	10532613	-	DFFA	H3K4me3-only	200.333	30.048	15	0.692	73	55	68	50	46	56	66	54	73	51	93	78	53	60	68	55
22880	NM_004565	chr1	10535002	10690815	+	PEX14	H3K4me3-only	178	29.667	11	0.485	52	30	78	48	25	33	57	60	74	36	111	80	57	75	55	128
2839	NM_017766	chr1	10707262	10856733	-	CASZ1	Bivalent	84	15.751	129.334	6.928	55	21	69	38	11	31	46	59	56	35	135	110	61	60	85	127
9824	NM_001170754	chr1	11006529	11042094	-	C1orf127	Unmarked	4	0.667	24	1.014	59	49	85	33	18	81	73	81	76	39	90	56	73	84	12	90
19928	NM_007375	chr1	11072678	11085549	+	TARDBP	H3K4me3-only	288	57.6	13.667	0.759	22	15	71	33	25	59	57	59	57	50	134	109	36	76	89	107
11898	NM_006610	chr1	11086579	11107296	-	MASP2	Unmarked	1.667	0.278	20.667	0.925	40	22	88	53	19	29	81	47	65	47	135	83	79	78	26	107
19498	NM_003132	chr1	11114648	11120091	-	SRM	H3K4me3-only	265.667	49.816	14	0.618	18	7	49	45	9	16	52	47	39	33	103	148	53	68	119	193
19376	NM_002685	chr1	11126675	11159938	-	EXOSC10	H3K4me3-only	267.333	50.128	14.333	0.729	59	34	64	50	28	32	50	60	56	43	88	99	63	61	85	127
15764	NM_004958	chr1	11166587	11322608	-	MTOR	H3K4me3-only	228.667	48.997	17	1.159	42	34	59	53	30	54	62	67	59	48	94	76	56	77	63	125
24195	NR_046600	chr1	11203954	11209595	+	MTOR-AS1	Unmarked	0.333	0.077	9.666	0.592	97	70	72	42	49	87	91	58	79	50	77	42	56	79	7	43
25184	NM_021146	chr1	11249345	11256038	+	ANGPTL7	Unmarked	1	0.188	8.333	0.333	93	48	102	47	44	48	68	55	71	37	59	75	83	82	13	74
21341	NM_013319	chr1	11333254	11348491	+	UBIAD1	H3K4me3-only	226	75.333	12.666	0.633	38	20	57	40	22	29	59	61	45	42	96	105	50	81	75	179
2759	NM_020780	chr1	11539294	11597640	+	PTCHD2	Bivalent	150	30	134.333	5.521	26	17	67	33	8	23	49	53	68	31	150	133	42	62	115	122
7135	NM_012168	chr1	11708417	11714888	-	FBXO2	H3K4me3-only	139.667	104.776	34.333	2.575	29	10	54	41	10	13	41	53	44	24	107	136	52	70	109	206
5736	NM_183412	chr1	11714431	11723384	+	FBXO44	H3K4me3-only	181.334	54.406	46.333	2.725	25	13	79	28	12	24	46	66	64	42	150	113	44	69	93	131
7048	NM_001014765	chr1	11714913	11723384	+	FBXO44	H3K4me3-only	134.333	100.775	34.667	2.6	13	12	71	24	10	30	54	44	57	40	203	133	41	56	105	106
9600	NM_018438	chr1	11724149	11734409	+	FBXO6	H3K4me3-only	29.333	4.19	24.666	1.276	30	20	77	37	24	46	55	50	61	48	161	103	49	61	81	96
6626	NM_001127325	chr1	11734536	11751678	-	MAD2L2	H3K4me3-only	277.333	103.987	37.666	2.018	27	8	94	27	10	10	37	28	70	31	213	145	48	36	116	99
13317	NM_006341	chr1	11734536	11741271	-	MAD2L2	H3K4me3-only	184	29.054	19	0.731	22	25	59	26	15	52	53	55	59	45	148	113	36	53	104	134
6552	NM_198545	chr1	11751780	11780336	+	DRAXIN	H3K4me3-only	282.667	70.667	38	2.036	6	5	35	36	9	19	47	77	28	23	97	149	39	105	118	206
11166	NM_001040197	chr1	11796141	11810828	+	AGTRAP	H3K4me3-only	158.667	13.222	21.667	0.867	45	25	93	44	24	48	64	40	69	51	135	91	69	51	55	95
18118	NM_005957	chr1	11845786	11866160	-	MTHFR	H3K4me3-only	274.667	32.961	15.333	0.73	25	16	60	62	14	30	61	56	60	33	117	100	63	82	73	147
18057	NR_046428	chr1	11866152	11903201	+	CLCN6	H3K4me3-only	277.333	33.281	15.333	0.73	30	15	82	33	13	22	64	59	56	62	149	102	61	60	73	118
18413	NR_037806	chr1	11900375	11907673	+	NPPA-AS1	Unmarked	2.333	0.7	15	0.608	39	35	75	52	23	65	83	70	56	48	88	74	83	93	20	95
11506	NM_006172	chr1	11905766	11907840	-	NPPA	Unmarked	1.333	0.4	21.333	1.208	51	33	96	41	20	60	76	62	78	39	100	79	72	87	23	82
3542	NM_002521	chr1	11917520	11918992	-	NPPB	H3K27me3-only	10.667	1.778	96.333	4.014	42	26	88	39	11	36	59	61	63	43	127	100	79	62	59	104
20163	NM_138346	chr1	11979644	11986485	-	KIAA2013	H3K4me3-only	94.333	21.771	13.666	1.025	25	16	41	32	12	58	90	51	40	60	127	125	37	78	94	113
16061	NM_000302	chr1	11994723	12035599	+	PLOD1	H3K4me3-only	123.333	26.427	16.667	0.862	53	34	65	40	25	33	73	52	64	38	138	95	50	78	60	101
16988	NM_014874	chr1	12040237	12073572	+	MFN2	H3K4me3-only	138	16.561	16	0.716	28	21	71	38	18	32	67	63	67	48	127	104	46	79	81	109
17288	NM_021933	chr1	12079298	12092106	+	MIIP	H3K4me3-only	88.667	18.999	15.667	0.922	101	29	63	41	25	21	61	57	57	40	95	104	51	74	77	103
3181	NM_001243	chr1	12123433	12204264	+	TNFRSF8	Bivalent	107.333	17.889	111.333	5.138	37	30	61	47	21	49	72	62	52	53	125	89	65	71	61	104
14771	NM_152942	chr1	12185957	12204264	+	TNFRSF8	Unmarked	1	0.273	17.667	0.697	30	25	74	32	18	56	97	77	50	70	110	75	63	97	25	100
2624	NM_001066	chr1	12227059	12269277	+	TNFRSF1B	Bivalent	26.333	7.181	143.333	6.935	37	24	75	29	18	29	66	45	64	45	154	119	46	60	87	101
10851	NR_039775	chr1	12251761	12251839	+	MIR4632	Unmarked	1	0.3	22.333	1.098	23	19	87	51	19	26	89	43	79	56	136	102	59	76	61	73
12794	NM_018156	chr1	12290112	12572098	+	VPS13D	H3K4me3-only	142.667	23.778	19.666	0.967	38	18	57	38	14	23	66	46	57	47	167	107	42	61	87	131
7120	NM_004753	chr1	12627938	12677820	-	DHRS3	H3K4me3-only	205.667	51.417	34.333	1.355	67	31	59	40	23	144	54	54	67	32	99	75	40	68	62	84
9128	NM_001013630	chr1	12704565	12727097	+	AADACL4	Unmarked	4.333	0.619	25.667	1.604	35	35	61	37	34	96	64	119	44	42	60	49	55	141	9	118
14336	NM_001103169	chr1	12776117	12788726	+	AADACL3	Unmarked	8	1	18	0.806	52	54	76	44	31	64	100	64	72	55	93	63	71	86	14	60
15861	NM_152290	chr1	12806162	12821102	+	C1orf158	Unmarked	2.333	0.5	17	1.109	94	65	92	49	48	69	78	63	74	55	64	50	85	69	8	36
9853	NM_001080830	chr1	12834983	12838048	+	PRAMEF12	Unmarked	1.333	0.267	24	1.756	54	51	89	39	34	80	89	57	75	51	90	60	70	77	8	75
23261	NM_023013	chr1	12851545	12856777	+	PRAMEF1	Unmarked	1	1.499	10.667	1.524	82	86	66	44	58	135	76	72	62	59	44	30	76	61	9	39
26134	NM_001146344	chr1	12884467	12891264	-	PRAMEF11	Unmarked	1.666	0.999	7	0.875	69	64	62	55	39	108	86	71	64	51	59	40	78	81	7	65
23937	NM_001146181	chr1	12907235	12908237	-	LOC649330	Unmarked	2.333	0.875	10	1.25	74	58	70	50	41	103	77	69	72	50	59	53	65	78	28	52
23875	NM_001013631	chr1	12907260	12908578	-	HNRNPCL1	Unmarked	2.333	0.875	10	1.111	68	62	65	57	43	104	78	72	69	49	55	45	73	82	20	57
26942	NM_023014	chr1	12916940	12921764	+	PRAMEF2	Unmarked	1	1	5.666	0.567	80	82	64	49	57	146	75	69	59	57	46	27	79	62	4	43
25914	NM_001009611	chr1	12939032	12946025	-	PRAMEF4	Unmarked	0	0	7.333	1.375	69	61	62	55	39	113	86	66	67	49	62	41	72	81	9	67
27991	NM_001039361	chr1	12952726	12958094	-	PRAMEF10	Unmarked	1.333	1.999	0.667	0.4	76	70	64	44	39	94	85	77	67	52	66	40	73	79	9	64
25620	NM_001136561	chr1	13182959	13184326	-	HNRNPCP5	Unmarked	1	0.375	7.667	1	70	62	65	53	41	105	77	77	66	51	50	46	73	82	21	60
28111	NM_001013692	chr1	13328195	13331692	-	PRAMEF3	Unmarked	0	10	0	0	47	41	84	45	31	83	94	49	77	51	97	62	63	81	12	82
28130	NM_001024661	chr1	13447413	13452656	-	PRAMEF13	Unmarked	0	10	0	0	82	84	66	47	58	134	70	74	59	57	44	30	80	61	10	43
27912	NM_001045480	chr1	13495253	13498259	+	PRAMEF16	Unmarked	0	10	1.333	4.003	40	47	84	48	28	61	92	59	83	43	100	62	68	90	12	82
27927	NM_001099851	chr1	13716087	13719064	+	PRAMEF17	Unmarked	0	0	1	3.003	40	47	84	48	28	61	92	59	83	43	100	62	68	90	12	82
797	NM_001010847	chr1	13801444	13840242	-	LRRC38	Bivalent	51.333	11.847	418.333	17.676	20	13	50	47	11	34	50	67	41	33	86	135	58	83	109	162
6948	NM_006474	chr1	13910251	13944452	+	PDPN	H3K4me3-only	186.333	39.926	35.333	1.963	72	33	61	39	31	69	62	55	50	39	88	93	51	76	60	120
9668	NM_001006625	chr1	13911966	13944452	+	PDPN	H3K4me3-only	113.667	21.314	24.333	1.304	81	60	67	40	51	94	87	53	59	52	86	62	57	78	19	53
3886	NM_001135610	chr1	14026734	14151574	+	PRDM2	Bivalent	150.667	41.087	83	4.698	22	22	46	37	18	39	61	50	50	55	162	122	37	53	119	106
19670	NM_015866	chr1	14031349	14114574	+	PRDM2	Unmarked	2.667	2.667	14	1.68	84	92	69	42	98	130	81	51	58	68	48	30	48	69	6	25
7270	NM_001007257	chr1	14075875	14114574	+	PRDM2	H3K4me3-only	161.667	34.64	33.333	2.703	25	15	42	34	12	51	50	60	41	37	90	147	38	70	133	154
2978	NM_015209	chr1	14925212	15394651	+	KAZN	Bivalent	164.333	32.867	120.667	5.246	27	16	57	40	9	25	40	72	51	28	125	119	54	77	100	159
2510	NM_001018000	chr1	15250624	15394651	+	KAZN	Bivalent	83	15.563	152	8.143	14	12	63	35	3	12	41	53	59	39	171	143	48	46	138	122
13177	NM_001018001	chr1	15256295	15394651	+	KAZN	Unmarked	2.333	0.467	19.333	1.074	52	45	75	45	33	74	89	64	58	64	90	66	74	77	24	69
13219	NM_001017999	chr1	15272414	15394651	+	KAZN	Unmarked	6.333	1.118	19.333	0.841	44	42	80	41	24	83	77	71	59	49	71	75	81	81	25	96
4013	NR_027136	chr1	15438310	15478960	-	TMEM51-AS1	Bivalent	93.667	17.564	78.666	4.37	56	43	75	46	29	61	60	69	64	38	88	78	71	78	45	98
3942	NM_001136217	chr1	15479027	15546974	+	TMEM51	Bivalent	101.667	21.784	81.333	4.436	62	40	73	39	26	55	68	61	61	45	95	87	64	70	52	101
3937	NM_001136218	chr1	15480228	15546974	+	TMEM51	Bivalent	199	59.706	81.333	3.754	19	11	50	41	12	22	46	65	44	40	131	125	46	73	112	162
22752	NM_001278501	chr1	15494969	15498120	-	C1orf195	Unmarked	4.667	1.556	11.333	0.872	57	47	73	49	28	65	85	70	68	50	79	60	73	86	20	89
11379	NM_052929	chr1	15573767	15724622	+	FHAD1	H3K4me3-only	119.667	27.618	21.333	0.941	30	29	63	45	26	36	48	69	53	29	120	91	58	85	62	155
3379	NM_024329	chr1	15736390	15756839	+	EFHD2	Bivalent	188.333	56.506	102.667	5.221	28	15	76	42	7	22	32	45	62	27	136	136	63	42	117	149
9498	NM_007272	chr1	15764937	15773153	+	CTRC	Unmarked	1	0.158	25	1.293	75	43	81	47	31	47	76	63	56	52	103	67	85	75	18	80
21232	NM_033440	chr1	15783222	15798586	+	CELA2A	Unmarked	0.667	0.105	12.667	0.704	98	45	66	71	37	74	63	65	61	38	74	43	84	82	13	85
23323	NM_015849	chr1	15802595	15817895	+	CELA2B	Unmarked	1	0.3	10.666	0.865	111	46	71	62	40	69	61	69	62	40	70	40	77	84	10	87
20668	NM_032996	chr1	15817895	15851285	-	CASP9	H3K4me3-only	113.667	42.62	13.333	0.597	21	23	64	30	6	25	85	25	92	53	258	111	19	40	107	40
22500	NR_102732	chr1	15817895	15850940	-	CASP9	H3K4me3-only	166.333	38.387	11.666	0.583	18	21	60	31	7	21	80	35	82	51	222	118	23	50	110	70
18379	NM_015291	chr1	15853351	15898228	+	DNAJC16	H3K4me3-only	184.667	18.467	15	0.529	36	26	73	43	32	49	51	78	61	45	108	86	49	91	68	103
13359	NM_024758	chr1	15898193	15911605	-	AGMAT	H3K4me3-only	96.667	18.126	19	1.075	48	31	66	45	29	48	67	50	56	38	119	103	57	77	64	101
18091	NM_032341	chr1	15943952	15987552	+	DDI2	H3K4me3-only	259	31.081	15.333	0.554	31	27	68	37	26	53	46	73	58	36	95	107	47	82	87	126
23420	NM_006511	chr1	15986363	15988217	+	RSC1A1	Unmarked	1	0.273	10.666	0.552	93	79	76	48	63	84	74	73	69	51	35	39	71	80	9	55
23057	NM_015164	chr1	16010826	16061264	+	PLEKHM2	H3K4me3-only	147	63.009	11	0.868	15	7	60	15	4	13	53	65	58	57	212	116	20	59	117	128
17057	NM_207348	chr1	16062808	16067884	+	SLC25A34	Unmarked	5.333	1.455	16	0.828	21	15	89	51	20	22	82	40	52	44	127	109	83	83	34	127
13182	NM_001013641	chr1	16068986	16074292	+	TMEM82	Unmarked	10.333	1.938	19.333	0.795	27	19	57	51	18	51	76	77	44	40	78	76	64	112	27	182
7910	NM_017556	chr1	16085254	16113084	+	FBLIM1	H3K4me3-only	161.333	30.252	30	1.304	30	16	67	31	10	17	32	57	56	40	196	108	48	42	105	144
17641	NM_001024215	chr1	16090993	16101715	+	FBLIM1	Unmarked	3	0.45	15.666	0.712	28	26	91	34	16	43	108	62	72	68	111	72	62	93	13	100
19073	NM_001024216	chr1	16091458	16113084	+	FBLIM1	Unmarked	2.333	0.412	14.334	0.694	38	32	84	34	13	47	90	62	71	53	138	73	66	79	24	95
16431	NM_001089591	chr1	16133656	16134194	-	UQCRHL	Unmarked	1.666	0.5	16.333	1.256	70	63	75	55	48	80	78	60	77	46	62	52	69	76	22	66
7854	NR_024279	chr1	16160709	16174642	-	FLJ37453	H3K4me3-only	224.333	61.176	30.333	1.422	11	9	47	47	3	19	36	60	53	27	133	156	47	62	154	135
8482	NM_015001	chr1	16174358	16266950	+	SPEN	H3K4me3-only	199.333	54.359	28	1.527	18	11	61	30	7	21	45	57	55	39	121	156	40	59	144	135
14656	NM_003443	chr1	16268363	16302627	-	ZBTB17	H3K4me3-only	138.667	27.733	18	1.019	51	42	64	52	35	53	73	41	69	56	137	83	54	50	71	68
10030	NM_178840	chr1	16330730	16333184	+	C1orf64	Unmarked	1	0.115	23.667	1.076	87	42	91	46	32	40	77	50	72	53	87	70	76	64	26	86
7016	NM_014424	chr1	16340522	16345285	-	HSPB7	Unmarked	2.667	0.616	35	1.641	50	25	97	54	18	44	65	59	73	35	116	77	85	82	24	95
5566	NM_004070	chr1	16348485	16360545	+	CLCNKA	Unmarked	2.333	0.333	48.333	2.636	24	26	91	54	17	36	87	66	71	52	117	69	84	91	14	100
9595	NM_000085	chr1	16370230	16383821	+	CLCNKB	Unmarked	3.333	0.909	24.666	1.233	19	20	80	40	12	36	93	67	57	47	135	91	72	105	21	104
9741	NM_001165945	chr1	16375256	16383821	+	CLCNKB	H3K4me3-only	84	22.907	24.333	1.404	21	25	65	43	12	35	80	70	58	47	144	83	63	90	43	120
2298	NM_182623	chr1	16384263	16400127	-	FAM131C	Bivalent	59.333	14.833	167.333	9.472	24	23	60	39	18	28	53	55	47	38	115	126	56	65	98	154
4723	NM_004431	chr1	16450831	16482582	-	EPHA2	H3K4me3-only	165	29.116	62	2.696	35	26	82	37	20	44	51	58	65	35	130	112	60	67	80	97
11330	NM_153213	chr1	16524598	16539104	-	ARHGEF19	H3K4me3-only	108.333	9.285	21.333	0.627	30	32	83	41	25	50	75	76	55	45	103	73	76	99	15	121
9434	NM_030907	chr1	16558181	16563659	-	RSG1	H3K4me3-only	112.333	14.042	25	1.042	53	37	91	49	34	32	59	47	80	47	122	80	63	57	57	91
13249	NM_018994	chr1	16576558	16678948	-	FBXO42	H3K4me3-only	273.667	35.694	19.333	0.967	27	17	74	37	17	29	60	67	54	49	110	115	57	78	85	123
21024	NM_001271869	chr1	16693524	16724643	+	SZRD1	H3K4me3-only	125	28.848	13	0.75	71	52	75	36	53	78	60	50	69	44	96	73	42	67	50	83
10342	NM_198546	chr1	16725137	16763919	-	SPATA21	Unmarked	1.667	0.5	23	1.972	80	64	80	56	45	58	76	55	63	47	76	57	93	65	10	74
6658	NM_018090	chr1	16767166	16786584	+	NECAP2	H3K4me3-only	196.333	26.774	37.333	2.036	36	21	88	51	32	45	56	57	71	58	133	82	58	66	67	78
23815	NR_023386	chr1	16793930	16819196	-	CROCCP3	Unmarked	1.333	0.8	10	0.714	47	47	73	50	36	85	89	65	60	53	79	65	74	90	16	70
894	NM_017940	chr1	16888921	16940100	-	NBPF1	Bivalent	394.333	20.754	388.333	6.263	38	20	66	28	17	49	76	45	59	51	141	124	38	67	92	88
7289	NR_026752	chr1	16944750	16957401	-	CROCCP2	Unmarked	6	0.409	33	0.697	32	16	105	26	16	26	73	54	77	49	142	97	54	78	45	109
2708	NR_027504	chr1	16972068	16976915	+	MST1P2	Unmarked	16	1.655	138	2.895	43	30	88	50	28	40	85	51	60	41	109	86	81	93	13	101
6363	NR_026567	chr1	17017712	17046652	-	ESPNP	Unmarked	2.667	0.286	39.667	1.123	44	27	80	51	16	35	76	60	52	35	107	89	90	90	20	127
9089	NM_001271733	chr1	17081128	17090975	-	MST1L	Unmarked	1.333	0.4	26	1.814	87	47	94	45	31	58	75	51	74	40	100	67	81	70	12	67
15226	NM_014675	chr1	17248444	17299474	+	CROCC	H3K4me3-only	92.333	11.542	17.333	0.675	21	31	57	41	24	49	89	83	44	57	127	65	61	109	20	121
6275	NM_001135247	chr1	17300998	17308081	-	MFAP2	Unmarked	8.333	1.786	40.333	1.806	91	49	100	34	32	55	80	47	75	50	113	72	75	60	18	48
6578	NM_001135248	chr1	17300998	17307173	-	MFAP2	H3K4me3-only	128	24.002	38	1.81	36	13	101	36	8	30	55	40	94	41	192	94	48	48	74	89
8064	NM_022089	chr1	17312452	17338423	-	ATP13A2	H3K4me3-only	166	27.667	29.333	1.035	14	18	73	32	9	47	60	50	60	46	124	124	54	54	98	136
18055	NM_003000	chr1	17345224	17380665	-	SDHB	H3K4me3-only	168.667	31.627	15.333	0.719	63	32	80	39	22	40	69	55	71	46	118	91	59	68	58	88
1626	NM_007365	chr1	17393255	17445948	-	PADI2	Bivalent	138.667	26.002	242.667	12.339	35	23	59	59	15	42	59	63	63	36	106	88	63	78	69	141
12697	NM_013358	chr1	17531620	17572501	+	PADI1	Unmarked	3.667	0.917	19.667	1.341	39	31	110	46	31	40	80	56	73	62	127	65	84	74	9	72
13611	NM_016233	chr1	17575592	17610727	+	PADI3	Unmarked	4	1.2	18.667	1.077	68	38	86	39	25	46	79	59	61	46	113	77	77	78	19	88
11011	NM_012387	chr1	17634689	17690495	+	PADI4	Unmarked	3.333	0.435	22	1.179	33	38	93	55	25	43	88	50	75	50	95	71	87	75	14	107
10899	NM_207421	chr1	17698740	17728195	+	PADI6	Unmarked	4	0.923	22	1	31	32	85	49	21	31	94	60	64	42	101	87	81	101	14	106
4519	NM_018715	chr1	17733250	17766250	-	RCC2	Bivalent	215.667	53.917	66.333	3.755	96	38	65	36	26	79	51	61	51	47	101	93	61	53	76	65
6650	NM_001136204	chr1	17733250	17765059	-	RCC2	H3K4me3-only	363.333	99.082	37.333	2.286	35	19	67	32	14	34	46	45	54	34	166	133	51	52	108	109
13323	NM_018125	chr1	17866329	18024370	+	ARHGEF10L	H3K4me3-only	187	80.154	19	0.877	11	5	52	24	5	21	75	47	46	67	188	135	29	55	122	117
17634	NM_001011722	chr1	17907047	18024370	+	ARHGEF10L	Unmarked	2.667	0.471	15.666	0.758	47	34	91	36	25	49	92	60	71	53	122	78	64	91	19	67
13012	NM_030812	chr1	18081807	18153558	+	ACTL8	Unmarked	5	1.154	19.333	1.657	44	42	59	38	33	141	95	63	36	58	75	76	70	92	16	61
1031	NM_032880	chr1	18434239	18704977	+	IGSF21	Bivalent	113	26.079	352.667	15.559	33	25	93	25	17	21	47	43	84	29	154	129	42	53	102	102
7547	NM_152375	chr1	18807423	18812480	+	KLHDC7A	Unmarked	11.667	1.591	31.667	1.338	49	28	97	52	19	27	73	51	62	30	98	95	95	85	18	120
576	NM_002584	chr1	18957499	19062632	+	PAX7	Bivalent	61.333	13.142	515.333	27.608	64	25	63	36	16	54	44	87	66	42	100	69	42	80	71	140
6887	NM_152232	chr1	19166092	19186155	-	TAS1R2	Unmarked	3.333	0.909	35.667	2.019	48	54	62	53	39	57	83	74	54	42	83	57	76	99	8	110
7513	NM_003748	chr1	19197923	19229293	-	ALDH4A1	H3K4me3-only	172	28.667	32	1.959	36	29	70	31	22	49	60	62	60	46	107	105	48	68	82	124
22001	NM_001161504	chr1	19197923	19217385	-	ALDH4A1	Unmarked	2.666	0.615	12	0.783	44	33	81	55	23	87	87	66	69	60	88	56	77	84	17	72
15517	NR_039844	chr1	19209695	19209769	-	MIR4695	Unmarked	2.667	0.667	17	0.662	36	38	85	41	17	39	86	57	68	45	111	90	79	78	31	98
3082	NM_001136265	chr1	19230773	19282826	-	IFFO2	Bivalent	110	47.15	116	5.438	13	10	55	30	5	9	59	40	47	29	158	175	43	66	136	124
18626	NM_020765	chr1	19400999	19536746	-	UBR4	H3K4me3-only	334.667	40.162	14.667	0.71	29	22	61	43	25	49	55	60	59	41	112	111	43	76	95	118
12247	NM_015047	chr1	19542157	19578053	-	EMC1	H3K4me3-only	407	58.143	20.333	0.897	41	32	56	37	25	54	73	62	49	61	89	101	50	67	82	120
12196	NM_016183	chr1	19578074	19586622	+	MRTO4	H3K4me3-only	411.667	58.81	20.333	0.884	54	32	69	59	25	42	48	50	63	38	123	100	72	54	83	87
6616	NR_040289	chr1	19592475	19600568	-	AKR7L	Unmarked	4.333	0.928	37.667	2.457	16	18	65	60	12	39	65	62	59	44	97	106	72	77	80	127
2726	NM_012067	chr1	19609056	19615280	-	AKR7A3	Bivalent	38	7.125	136.667	8.368	26	15	70	56	18	47	50	64	51	47	93	105	72	69	84	132
16825	NR_037847	chr1	19619740	19622230	-	LOC100506730	Unmarked	1.333	0.5	16	1.2	89	59	59	50	39	86	76	77	50	42	69	50	78	91	8	76
5270	NM_003689	chr1	19629201	19638640	-	AKR7A2	H3K4me3-only	256.333	51.267	52.667	2.052	14	19	58	42	8	14	53	51	47	36	114	143	65	57	114	164
5276	NM_001040126	chr1	19638739	19655794	+	PQLC2	H3K4me3-only	245.333	56.62	52.666	2	13	21	54	34	9	18	59	48	46	36	159	149	54	60	118	121
11636	NM_001206540	chr1	19665266	19812066	-	CAPZB	H3K4me3-only	241.667	90.614	21	1.145	9	8	41	33	5	15	55	51	38	40	160	133	39	63	115	194
13214	NR_038125	chr1	19665266	19811201	-	CAPZB	H3K4me3-only	273	37.229	19.333	1.094	16	22	58	30	16	38	74	83	39	44	104	99	54	108	50	164
18891	NM_001204083	chr1	19923470	19956315	+	MINOS1	H3K4me3-only	282.333	40.333	14.666	0.667	54	26	96	32	15	37	61	57	85	59	145	83	55	47	70	77
18974	NM_001204088	chr1	19923470	19984949	+	MINOS1-NBL1	H3K4me3-only	282.333	40.333	14.666	0.667	54	26	96	32	15	37	61	57	85	59	145	83	55	47	70	77
26654	NR_077246	chr1	19934300	19935138	+	RPS14P3	Unmarked	1.667	0.455	6	0.439	139	79	73	45	73	105	73	45	65	55	50	37	58	57	12	33
1323	NM_182744	chr1	19969722	19984949	+	NBL1	H3K27me3-only	11.334	2.616	293.666	17.274	83	51	101	56	41	47	63	53	79	45	94	55	89	60	15	67
1297	NM_001278165	chr1	19969902	19984949	+	NBL1	Bivalent	18.667	5.091	298	18.245	65	38	102	52	28	43	66	49	80	46	115	70	84	58	28	75
1229	NM_001204084	chr1	19970207	19984949	+	NBL1	Bivalent	32.666	7.539	311	20.283	52	22	89	50	27	31	52	41	60	42	122	105	74	56	67	109
1139	NM_005380	chr1	19970666	19984949	+	NBL1	Bivalent	64.333	32.166	329.667	19.02	24	7	59	40	8	13	38	35	50	24	151	161	48	49	138	154
1522	NM_001204085	chr1	19971865	19984949	+	NBL1	Bivalent	79.333	12.527	257.333	12.656	35	19	55	29	14	59	67	81	42	49	110	92	48	93	61	145
2118	NM_001204086	chr1	19972259	19984949	+	NBL1	Bivalent	23.667	3.945	185.333	8.176	43	21	78	35	16	57	80	47	55	48	141	98	63	74	43	100
4684	NM_001278166	chr1	19974103	19984949	+	NBL1	Unmarked	1.333	0.19	62.667	2.575	62	48	83	36	37	49	125	36	79	90	98	62	52	60	22	60
1222	NM_000871	chr1	19991779	20006055	+	HTR6	Bivalent	70.667	16.309	312.333	13.985	8	12	41	39	9	24	39	73	30	29	100	132	53	80	111	219
2391	NM_181719	chr1	20008705	20126410	-	TMCO4	Bivalent	47.667	12.999	160.333	7.635	31	11	62	41	11	49	61	45	50	39	145	122	53	66	89	124
8588	NM_019062	chr1	20140521	20141771	-	RNF186	Unmarked	3.333	0.714	27.333	1.242	85	34	75	53	22	36	88	57	54	57	65	77	87	75	25	109
20947	NM_015207	chr1	20208887	20239437	+	OTUD3	H3K4me3-only	190	35.627	13	0.574	47	32	68	27	25	55	61	61	56	44	115	119	46	70	91	82
11976	NM_014589	chr1	20246799	20250110	-	PLA2G2E	Unmarked	2	0.333	20.666	0.954	40	33	86	41	13	45	92	54	75	48	119	73	71	78	19	112
8999	NM_001161728	chr1	20301923	20306932	-	PLA2G2A	Unmarked	2	0.429	26	1.345	81	52	96	46	40	65	81	53	74	50	79	59	80	72	6	65
9330	NM_001161729	chr1	20301923	20306152	-	PLA2G2A	Unmarked	3	0.643	25.333	1.288	58	56	90	46	38	46	112	42	85	71	78	60	69	65	13	70
17273	NM_000929	chr1	20396700	20418394	+	PLA2G5	Unmarked	1.666	0.454	15.667	1.27	64	48	98	42	37	65	68	52	81	46	114	57	69	63	18	77
12100	NM_001271814	chr1	20439142	20446059	-	PLA2G2D	Unmarked	1	0.25	20.333	1.488	82	57	82	38	40	42	96	51	65	51	93	73	73	79	10	67
10904	NM_022819	chr1	20465822	20476879	+	PLA2G2F	Unmarked	2.666	0.666	22	1.269	46	35	77	47	23	59	85	62	63	48	105	65	73	86	15	110
10748	NM_001105572	chr1	20490483	20501687	-	PLA2G2C	Unmarked	1	0.333	22.333	1.861	73	58	69	45	39	94	88	61	60	54	95	55	73	76	12	47
4237	NM_152376	chr1	20512577	20519942	+	UBXN10	Bivalent	84	13.264	73	3.476	46	20	94	53	14	25	44	58	83	30	111	81	70	66	56	148
3814	NM_001039500	chr1	20617411	20681387	+	VWA5B1	H3K27me3-only	19.333	2.417	85.333	3.084	38	32	82	43	28	39	100	63	49	69	121	80	80	90	16	69
6640	NR_033887	chr1	20686293	20755287	-	LOC339505	Unmarked	0.667	0.133	37.333	1.556	75	46	84	38	40	66	84	73	64	66	84	48	63	86	10	72
2360	NM_018584	chr1	20808883	20812728	-	CAMK2N1	Bivalent	161.667	24.249	163	7.641	10	11	39	16	5	40	35	128	28	39	95	95	33	118	87	220
10322	NM_024544	chr1	20825940	20834674	-	MUL1	H3K4me3-only	246.667	36.998	23	1.169	48	40	67	43	29	47	58	82	55	56	108	69	66	72	56	103
575	NM_207334	chr1	20878931	20881513	+	FAM43B	Bivalent	58	13.386	515.333	26.204	38	19	76	52	20	26	52	57	56	34	111	106	71	75	68	138
7986	NM_001785	chr1	20915443	20945400	+	CDA	Unmarked	6	0.692	29.667	1.023	53	19	95	45	24	48	83	57	56	55	76	83	79	90	16	120
6707	NM_032409	chr1	20959947	20978004	+	PINK1	H3K4me3-only	132.333	30.541	37	1.48	46	26	57	40	24	49	65	52	38	49	137	121	60	67	86	82
14443	NM_005216	chr1	20978259	20988037	-	DDOST	H3K4me3-only	327.667	51.74	18	0.915	29	24	71	39	20	44	65	60	57	44	128	103	58	77	68	112
4390	NM_001122819	chr1	20990506	21044317	-	KIF17	Bivalent	95.666	35.87	69.333	4.426	23	12	65	28	7	16	54	46	52	39	143	148	46	56	120	144
2526	NM_001103160	chr1	21046224	21059133	-	SH2D5	Bivalent	111.667	13.958	150	6.164	22	21	86	28	7	26	72	59	74	54	132	102	54	64	72	126
20646	NM_016287	chr1	21069170	21113181	-	HP1BP3	H3K4me3-only	319	68.352	13.333	0.615	12	9	48	20	11	44	62	71	47	56	109	135	19	80	128	148
6400	NM_001198801	chr1	21132784	21503381	-	EIF4G3	H3K4me3-only	97	19.4	39.333	1.844	32	21	52	24	11	39	49	67	53	44	110	115	34	62	110	176
26353	NM_003760	chr1	21132784	21437876	-	EIF4G3	Unmarked	1	0.3	6.666	0.541	100	95	82	32	83	126	73	63	60	66	25	36	66	59	6	27
23169	NM_001198803	chr1	21267737	21501251	-	EIF4G3	H3K4me3-only	45.667	8.058	11	0.635	77	69	63	42	64	142	103	56	58	91	41	31	53	63	14	32
3372	NM_001113348	chr1	21543739	21672034	-	ECE1	Bivalent	224.333	56.083	103	5.328	21	10	61	48	7	25	46	58	40	37	125	146	72	64	116	123
7466	NM_001113349	chr1	21543739	21616766	-	ECE1	H3K4me3-only	136	27.2	32.333	1.702	14	18	51	34	10	30	54	62	50	37	155	113	43	70	96	162
7494	NM_001397	chr1	21543739	21616982	-	ECE1	H3K4me3-only	126	23.626	32	1.684	27	23	48	43	15	45	58	60	51	38	159	102	48	71	85	126
17500	NM_001113347	chr1	21543739	21606183	-	ECE1	Unmarked	1.667	0.313	15.666	0.81	42	29	65	41	15	59	100	70	57	53	104	76	64	103	20	101
9869	NR_038404	chr1	21619782	21626362	+	LOC100506801	Unmarked	5	1.154	24	1.412	46	29	86	57	23	69	74	63	71	44	104	62	77	88	17	89
3403	NM_001256416	chr1	21766582	21811393	+	NBPF3	Bivalent	110	27.5	101.667	8.243	37	25	61	35	21	70	68	51	60	51	146	108	40	64	89	73
4437	NM_001177520	chr1	21835857	21904905	+	ALPL	H3K4me3-only	175.667	29.278	68	2.957	27	14	84	47	10	16	49	43	76	34	155	118	60	54	95	117
3310	NM_002885	chr1	21922707	21995856	-	RAP1GAP	Bivalent	118.333	22.189	105.666	5.032	24	9	77	30	5	25	66	49	59	50	154	120	51	61	86	133
4384	NM_001145658	chr1	21922707	21978348	-	RAP1GAP	Bivalent	82	13.667	69.666	3.119	16	25	51	25	14	24	95	36	47	73	186	133	39	47	108	80
16067	NM_032236	chr1	22004791	22109688	-	USP48	H3K4me3-only	343	38.111	16.667	0.667	39	13	76	39	22	36	63	46	58	60	146	125	47	58	105	66
9148	NM_001013693	chr1	22138757	22151714	+	LDLRAD2	Unmarked	2.667	0.364	25.667	1.375	46	33	93	38	22	44	96	69	74	51	89	67	68	103	3	103
7300	NM_005529	chr1	22148736	22263750	-	HSPG2	H3K4me3-only	109.333	41.01	33	1.238	18	12	57	18	6	13	59	30	52	35	240	156	29	47	127	100
24061	NM_007352	chr1	22303417	22315847	+	CELA3B	Unmarked	2.333	1	10	0.882	57	37	70	51	31	67	94	66	64	61	81	54	63	93	15	95
21629	NM_005747	chr1	22328148	22339035	+	CELA3A	Unmarked	2.667	0.5	12.333	1.028	50	40	69	51	33	67	90	72	60	57	79	54	67	99	12	99
18872	NR_023918	chr1	22351706	22357715	+	LINC00339	H3K4me3-only	202.333	24.281	14.666	0.603	58	32	68	52	41	57	62	76	51	56	68	72	60	92	49	105
18765	NR_023919	chr1	22352041	22357715	+	LINC00339	H3K4me3-only	309	35.652	14.666	0.603	54	33	62	46	35	59	65	76	56	49	89	71	50	93	49	112
17133	NM_001791	chr1	22379119	22419436	+	CDC42	H3K4me3-only	120.666	22.626	16	0.738	43	20	66	43	17	24	55	56	52	52	142	108	60	55	92	114
2618	NM_030761	chr1	22443797	22469519	-	WNT4	Bivalent	74.667	32.005	144	6.75	6	3	54	15	7	4	36	44	22	35	178	183	43	49	150	170
12001	NM_014870	chr1	22778343	22857650	+	ZBTB40	H3K4me3-only	174.333	23.774	20.666	0.886	65	26	71	42	25	25	57	59	65	44	116	97	49	72	78	108
1645	NM_001006943	chr1	22890003	22916112	+	EPHA8	Bivalent	74	15.856	240	10.589	18	16	50	29	5	20	81	33	56	61	167	143	34	41	130	115
8020	NM_015991	chr1	22963117	22966175	+	C1QA	Unmarked	2	0.462	29.667	1.935	56	35	101	47	23	50	82	50	75	49	122	69	84	72	10	74
8573	NM_001114101	chr1	22970117	22974603	+	C1QC	Unmarked	2.333	0.5	27.666	1.092	45	30	73	52	13	37	91	54	67	43	155	72	75	85	18	89
9732	NM_000491	chr1	22979681	22988029	+	C1QB	Unmarked	1.333	0.222	24.333	1.281	41	35	92	50	30	37	77	55	67	47	113	77	81	79	22	96
2366	NM_004442	chr1	23037330	23241823	+	EPHB2	Bivalent	90	27.003	162.667	7.625	16	12	48	18	5	22	63	33	44	31	169	172	29	57	136	144
10008	NR_039832	chr1	23046009	23046091	+	MIR4684	Unmarked	0.667	0.2	23.667	1.268	77	53	76	54	41	71	76	68	56	52	80	56	86	80	11	62
12289	NR_036214	chr1	23189651	23189719	-	MIR4253	Unmarked	2.666	0.381	20.333	0.859	33	36	85	52	29	58	81	73	62	54	88	66	83	92	16	91
25996	NM_001242521	chr1	23337326	23342343	-	C1orf234	Unmarked	1.333	0.444	7.333	0.688	75	94	42	50	71	137	85	59	44	53	45	43	70	68	13	50
17353	NM_015013	chr1	23345940	23410184	+	KDM1A	H3K4me3-only	317.667	41.433	15.667	0.723	56	26	66	49	32	45	53	44	60	46	121	110	48	57	98	88
24952	NR_036057	chr1	23370797	23370865	+	MIR3115	Unmarked	2.333	0.437	8.667	0.5	75	72	92	51	77	106	68	51	71	61	47	39	68	63	11	47
13143	NM_033631	chr1	23410515	23495351	-	LUZP1	H3K4me3-only	165.667	35.498	19.333	1.16	40	23	90	42	15	74	50	55	92	44	152	76	48	52	73	73
23612	NM_000864	chr1	23518387	23521222	-	HTR1D	Unmarked	4.333	0.812	10.333	0.633	74	61	66	42	47	110	90	73	63	64	53	41	60	85	12	58
6238	NM_005826	chr1	23636275	23670853	-	HNRNPR	H3K4me3-only	188.667	33.292	41	1.984	21	18	55	23	12	35	54	61	49	41	142	135	35	68	116	134
1147	NM_001077195	chr1	23685940	23696357	-	ZNF436	Bivalent	25.333	6.908	327.667	12.136	63	52	78	39	51	80	65	77	69	50	84	56	49	91	32	63
1206	NM_030634	chr1	23685940	23694879	-	ZNF436	Bivalent	178.667	19.144	314.334	13.282	31	17	80	32	21	52	69	72	55	40	109	109	53	105	55	99
1100	NR_033690	chr1	23695463	23698330	+	C1orf213	Bivalent	188.333	26.905	338.334	13.182	52	15	90	36	28	35	53	55	67	46	112	108	47	75	77	103
1152	NR_033691	chr1	23695710	23698330	+	C1orf213	Bivalent	126.333	21.055	327.333	12.123	41	21	95	44	27	28	46	60	77	40	115	102	56	72	78	97
515	NM_003196	chr1	23707554	23751261	-	TCEA3	Bivalent	32	8.726	553.333	36.889	22	17	65	53	12	29	66	44	58	52	137	106	65	53	84	136
6485	NM_017707	chr1	23755055	23810750	-	ASAP3	H3K4me3-only	173.667	40.08	38.667	1.933	24	14	88	31	6	16	46	41	91	35	224	111	36	44	103	89
3194	NM_004091	chr1	23832919	23857712	-	E2F2	Bivalent	88	12.001	110.666	4.486	63	24	64	33	17	33	55	51	50	35	124	126	55	64	91	114
7445	NM_002167	chr1	23884420	23886285	-	ID3	H3K4me3-only	170.333	31.939	32.333	1.311	73	38	64	30	26	94	67	67	49	42	101	92	57	80	53	66
9947	NR_027042	chr1	23953823	23967056	+	MDS2	Unmarked	3.667	0.647	24	1.075	49	40	54	77	23	68	77	84	47	48	48	59	102	96	23	104
16099	NM_000975	chr1	24018268	24022915	+	RPL11	H3K4me3-only	302	36.241	16.667	0.746	61	44	71	39	34	71	68	62	61	47	94	86	58	74	55	74
15851	NM_003198	chr1	24069855	24088549	+	TCEB3	H3K4me3-only	255.667	69.721	17	1.214	27	18	70	37	21	27	57	41	58	50	149	127	46	51	109	111
14835	NR_038280	chr1	24086871	24104787	-	LOC100506963	H3K4me3-only	337	67.4	17.666	1.262	38	30	67	48	29	40	63	59	62	47	81	115	54	74	94	98
15004	NM_020362	chr1	24104875	24114722	+	PITHD1	H3K4me3-only	357	76.495	17.666	1.128	35	26	74	40	24	43	58	62	53	50	94	126	63	67	97	87
15895	NM_007260	chr1	24117645	24122029	+	LYPLA2	H3K4me3-only	169	50.705	17	0.836	51	36	97	23	27	40	71	61	83	74	161	61	47	49	49	69
7363	NM_001008216	chr1	24122088	24127294	-	GALE	H3K4me3-only	210.667	45.14	32.667	1.256	26	10	66	39	15	43	52	59	49	46	141	112	51	70	88	132
7849	NM_000403	chr1	24122088	24127034	-	GALE	H3K4me3-only	224.333	44.867	30.333	1.123	26	14	67	34	15	33	49	59	50	45	160	120	51	64	99	113
10594	NM_001127621	chr1	24122088	24126060	-	GALE	H3K4me3-only	71.333	9.304	22.666	0.861	52	28	92	42	30	46	75	54	63	51	111	79	69	79	27	101
13041	NM_000191	chr1	24128366	24151949	-	HMGCL	H3K4me3-only	234.667	33.524	19.333	0.879	34	32	58	37	14	112	69	74	59	46	113	75	53	80	53	90
3188	NM_000147	chr1	24171571	24194859	-	FUCA1	Bivalent	124	17.714	111	5.55	24	19	64	47	20	61	54	76	53	53	94	104	57	78	92	103
15562	NM_001841	chr1	24200459	24239817	-	CNR2	Unmarked	1.333	0.286	17	0.911	53	39	74	62	40	89	77	56	47	61	74	57	88	73	14	95
18803	NR_039615	chr1	24255559	24255637	+	MIR378F	Unmarked	1.667	0.455	14.666	0.88	88	59	73	70	55	67	71	57	62	42	53	53	85	83	12	69
19069	NM_017761	chr1	24286300	24289949	+	PNRC2	H3K4me3-only	242.667	56.004	14.666	0.8	36	19	87	26	22	54	47	58	69	52	129	108	42	56	94	100
16567	NM_001191005	chr1	24295572	24306953	-	SRSF10	H3K4me3-only	222.667	22.267	16.333	0.721	74	20	83	50	32	39	61	36	71	54	121	97	50	55	78	78
9409	NM_152372	chr1	24382530	24438665	-	MYOM3	Unmarked	5	0.833	25	1.19	51	34	83	41	18	48	97	63	70	74	93	66	70	70	30	91
11253	NM_021258	chr1	24446260	24469775	-	IL22RA1	Unmarked	2	0.375	21.666	1.066	50	43	82	40	31	67	66	64	58	39	84	71	76	78	20	130
6833	NM_173064	chr1	24480646	24513765	-	IFNLR1	H3K4me3-only	162.333	37.464	36	2.038	55	32	60	38	23	52	56	50	63	33	126	99	44	64	79	125
13618	NR_027087	chr1	24526729	24538180	+	LOC284632	Unmarked	4	0.706	18.667	0.8	83	61	71	46	56	81	108	43	69	85	77	41	53	61	16	48
3932	NM_198173	chr1	24645811	24681808	+	GRHL3	Bivalent	48.667	6.348	81.334	4.207	93	46	81	45	41	69	59	72	64	49	83	51	68	77	24	77
3624	NM_001195010	chr1	24646055	24681808	+	GRHL3	Bivalent	54	8.1	93	4.574	72	38	85	43	34	78	67	73	63	59	89	54	68	78	24	74
2539	NM_021180	chr1	24649529	24681808	+	GRHL3	Bivalent	38	6.333	149.333	7.467	71	45	85	52	41	65	74	53	71	56	80	65	70	67	33	71
10062	NM_001199012	chr1	24683488	24741587	-	STPG1	H3K4me3-only	27.667	4.882	23.666	0.816	55	50	77	49	38	60	65	61	71	44	88	72	67	69	45	88
16039	NM_001199013	chr1	24683488	24740262	-	STPG1	H3K4me3-only	163	27.167	16.667	0.714	70	33	74	46	30	55	72	49	70	50	107	81	53	68	55	86
10507	NM_020448	chr1	24742244	24799473	+	NIPAL3	H3K4me3-only	164.667	24.699	22.667	0.829	58	30	91	37	28	63	66	55	69	48	117	85	61	72	45	74
5679	NR_045407	chr1	24822822	24828850	-	RCAN3AS	H3K4me3-only	158.667	33.998	47	2.074	33	30	58	51	38	52	47	73	47	39	109	88	54	89	69	122
5676	NM_001251979	chr1	24828840	24863510	+	RCAN3	H3K4me3-only	158.667	33.998	47	2.074	52	31	89	39	38	33	56	47	74	52	122	86	47	58	66	109
5678	NM_013441	chr1	24829386	24863510	+	RCAN3	H3K4me3-only	186.667	69.991	47	2.169	51	12	63	30	18	12	38	52	46	40	133	135	42	55	120	152
20331	NM_001251978	chr1	24834083	24863510	+	RCAN3	Unmarked	4.667	0.583	13.666	0.683	75	58	63	58	47	63	97	49	61	55	50	65	71	80	22	85
23214	NM_001251985	chr1	24840803	24863510	+	RCAN3	Unmarked	2.333	0.467	10.667	0.681	83	89	74	46	67	113	85	47	79	51	57	39	63	59	10	37
2722	NM_001010980	chr1	24882566	24935818	+	NCMAP	Bivalent	64	14.77	137.333	5.803	31	19	65	38	14	37	69	57	66	47	161	91	42	75	70	117
9580	NM_005839	chr1	24969593	24999772	+	SRRM1	H3K4me3-only	303.667	36.441	24.666	1.028	40	21	58	52	22	36	41	69	57	37	113	115	52	74	110	102
19438	NM_013943	chr1	25071759	25170815	+	CLIC4	H3K4me3-only	169	16.355	14.333	0.581	35	12	91	23	12	26	44	54	59	40	113	134	55	59	98	144
266	NM_004350	chr1	25226001	25256770	-	RUNX3	Bivalent	49	24.5	747.333	40.037	17	12	60	26	12	28	40	38	47	28	154	159	38	50	135	155
8534	NM_001031680	chr1	25226001	25291501	-	RUNX3	Unmarked	1	0.3	27.667	1.277	87	29	59	55	20	83	48	79	43	26	71	76	80	91	39	113
19849	NM_015484	chr1	25548766	25559013	-	SYF2	H3K4me3-only	440.667	60.094	14	0.778	51	33	85	33	37	69	64	60	67	54	111	83	47	73	55	77
14615	NM_020317	chr1	25568739	25573985	-	C1orf63	H3K4me3-only	281.667	44.476	18	0.931	30	13	73	39	15	52	53	70	59	59	125	100	51	66	92	102
16774	NM_016124	chr1	25598980	25656936	+	RHD	Unmarked	2.333	0.778	16.333	2.333	72	57	77	37	42	81	68	84	55	50	66	55	74	88	14	79
25301	NM_014313	chr1	25664788	25688852	+	TMEM50A	H3K4me3-only	185.667	39.783	8.333	0.862	49	10	66	68	15	19	52	48	70	40	110	100	59	65	92	136
18505	NM_020485	chr1	25688739	25747363	-	RHCE	Unmarked	1.667	0.715	15	1.667	68	57	79	39	45	82	69	80	57	52	64	56	72	85	17	77
12566	NM_018202	chr1	25757387	25826698	+	TMEM57	H3K4me3-only	229	40.409	20	0.938	35	41	59	37	42	41	47	43	49	37	130	117	46	54	98	123
5876	NM_015627	chr1	25870075	25895377	+	LDLRAP1	H3K4me3-only	105.333	28.725	44.667	2.482	30	27	64	23	20	40	63	57	49	48	162	122	45	65	91	93
2410	NM_020379	chr1	25943958	26111258	+	MAN1C1	Bivalent	136	29.141	159	6.195	23	9	44	30	3	16	50	67	46	28	136	142	34	83	123	165
6766	NM_020451	chr1	26126666	26144713	+	SEPN1	H3K4me3-only	97.334	36.496	36.333	1.879	21	13	70	34	9	24	53	38	66	26	168	129	43	60	98	147
6035	NM_001099627	chr1	26146396	26159433	+	MTFR1L	H3K4me3-only	278	64.159	43	2.15	39	13	98	34	16	31	64	50	85	56	138	104	44	61	82	84
7241	NR_024498	chr1	26146444	26150097	-	LOC646471	Unmarked	3.333	0.385	33.333	1.493	75	41	89	65	45	55	61	64	60	50	89	47	90	79	7	82
5408	NM_019557	chr1	26146683	26159433	+	MTFR1L	H3K4me3-only	275.667	55.133	50.333	2.517	21	6	79	37	9	23	54	58	69	49	152	122	43	66	108	103
5469	NM_001099626	chr1	26147318	26159433	+	MTFR1L	H3K4me3-only	154	27.175	49.667	2.569	31	19	87	33	16	44	90	47	76	69	153	97	47	64	66	60
11893	NM_024037	chr1	26160496	26185848	-	AUNIP	H3K4me3-only	292	38.085	20.667	1.016	61	28	88	40	15	35	63	46	97	49	154	89	44	48	84	58
16737	NM_178422	chr1	26187974	26197744	-	PAQR7	Unmarked	1.333	0.267	16.333	0.845	77	55	84	45	52	77	76	61	67	49	81	50	65	85	6	69
10057	NM_001145454	chr1	26210676	26232993	-	STMN1	H3K4me3-only	126.667	23.752	23.666	0.922	13	11	51	32	11	31	75	57	40	62	187	113	43	70	89	114
9000	NM_203399	chr1	26226606	26233368	-	STMN1	H3K4me3-only	60.667	9.101	26	0.975	39	24	63	47	20	42	81	55	54	60	131	92	60	71	63	97
9992	NM_203401	chr1	26226606	26232644	-	STMN1	H3K4me3-only	192	41.14	23.667	0.845	9	9	46	34	6	37	70	50	46	56	204	119	38	61	105	109
10160	NR_037481	chr1	26232852	26232945	-	MIR3917	H3K4me3-only	135.333	25.377	23.333	0.875	15	10	52	34	10	32	72	57	42	57	178	115	44	73	90	118
10109	NM_000437	chr1	26286257	26324648	-	PAFAH2	H3K4me3-only	144.333	10.561	23.666	0.789	53	41	63	62	35	76	55	72	63	44	82	61	68	77	49	98
14653	NM_004455	chr1	26348270	26362954	+	EXTL1	Unmarked	31.667	2.639	18	0.675	33	31	100	44	17	35	81	56	74	35	122	87	85	88	15	96
473	NM_032513	chr1	26364513	26372604	-	SLC30A2	Bivalent	40.333	6.369	579	22.856	28	17	77	45	7	34	45	37	64	25	167	137	67	47	105	97
9703	NM_032588	chr1	26377795	26394125	-	TRIM63	Unmarked	3.333	1.667	24.333	1.781	53	56	76	41	35	57	83	70	68	47	82	62	70	85	18	96
5716	NM_001243532	chr1	26437655	26452039	+	PDIK1L	H3K4me3-only	249.667	49.933	46.333	2.044	30	20	70	46	11	10	53	42	65	29	122	137	60	57	107	140
6221	NM_152835	chr1	26438267	26452039	+	PDIK1L	H3K4me3-only	243	29.161	41	1.836	19	12	78	34	8	10	47	48	64	32	140	145	52	59	115	136
2178	NM_024869	chr1	26485510	26489119	+	FAM110D	H3K27me3-only	5.333	1.067	179.333	10.98	50	28	107	46	24	48	74	47	78	39	118	73	79	79	9	100
6803	NM_015871	chr1	26496387	26497364	+	ZNF593	H3K4me3-only	202.667	22.519	36.333	1.38	26	28	79	52	18	33	55	59	80	39	114	95	61	65	79	116
24046	NM_006314	chr1	26503980	26516375	+	CNKSR1	H3K4me3-only	25.333	4.222	10	0.462	72	32	96	44	33	39	73	43	70	50	113	81	69	67	32	85
23956	NR_023345	chr1	26503981	26516375	+	CNKSR1	H3K4me3-only	25.333	4.222	10	0.462	72	32	96	44	33	39	73	43	70	50	113	81	68	68	32	85
13324	NM_198137	chr1	26517118	26529033	+	CATSPER4	Unmarked	6	0.9	19	0.838	52	47	83	56	28	34	69	67	77	36	106	59	81	81	20	103
7928	NM_022778	chr1	26560692	26605299	+	CEP85	H3K4me3-only	246.667	23.872	30	1.184	37	18	86	44	20	33	57	55	68	53	100	108	60	61	86	113
12321	NM_031286	chr1	26606212	26608013	+	SH3BGRL3	H3K4me3-only	151	12.583	20	0.645	38	21	73	33	21	36	76	70	56	55	107	99	49	91	61	113
13829	NM_145345	chr1	26608772	26644756	-	UBXN11	Unmarked	7.667	1.353	18.666	0.789	34	33	89	32	31	65	89	73	63	57	107	71	61	102	13	79
18578	NM_183008	chr1	26608772	26633195	-	UBXN11	H3K4me3-only	201.667	33.611	15	0.849	56	44	83	48	34	43	63	60	75	47	91	76	66	67	51	95
13816	NM_001803	chr1	26644410	26647014	+	CD52	Unmarked	8	0.923	18.666	0.8	65	42	80	57	44	56	59	69	55	28	66	69	79	102	14	114
10312	NM_001039775	chr1	26648349	26680621	-	AIM1L	Unmarked	2	0.316	23	1.078	23	18	88	57	12	27	73	65	65	32	109	82	86	100	18	144
8316	NM_001114759	chr1	26688124	26699266	-	ZNF683	Unmarked	2.333	0.467	28.333	1.491	55	45	86	48	30	61	94	55	73	58	88	63	77	76	13	77
7993	NM_024674	chr1	26737268	26756219	+	LIN28A	H3K4me3-only	303	53.467	29.667	1.156	40	18	76	44	23	52	82	54	64	78	151	63	50	63	47	94
18459	NM_001243565	chr1	26758772	26797795	+	DHDDS	H3K4me3-only	225.333	20.485	15	0.542	77	36	92	49	36	38	62	49	83	47	90	82	58	65	58	77
7113	NM_005517	chr1	26798901	26803133	+	HMGN2	H3K4me3-only	246.667	41.111	34.333	1.537	40	15	68	41	15	31	51	47	56	34	94	132	53	64	102	156
8768	NM_002953	chr1	26856248	26901520	+	RPS6KA1	H3K4me3-only	176.333	26.449	27	1.08	22	21	79	24	17	13	53	47	67	42	188	126	40	54	103	103
16681	NM_001006665	chr1	26872342	26901520	+	RPS6KA1	Unmarked	2.333	0.437	16.333	0.79	23	30	75	33	20	50	102	56	57	52	119	89	61	96	21	115
20670	NR_031740	chr1	26881032	26881084	+	MIR1976	Unmarked	1.333	0.444	13.333	1.026	37	30	72	55	24	38	84	68	54	53	109	70	78	93	22	112
7805	NM_139135	chr1	27022521	27108601	+	ARID1A	H3K4me3-only	198	59.406	30.666	2.044	19	5	80	16	4	16	33	60	60	21	144	151	37	71	119	163
15672	NM_017837	chr1	27114453	27124894	+	PIGV	H3K4me3-only	282.333	65.159	17	0.573	32	13	91	38	11	35	65	52	76	47	136	107	54	68	74	100
14923	NM_001202554	chr1	27114678	27124894	+	PIGV	H3K4me3-only	306.667	51.111	17.666	0.639	37	18	91	36	22	30	61	47	73	46	147	105	50	66	72	98
10664	NM_032283	chr1	27153200	27182211	+	ZDHHC18	H3K4me3-only	147.667	40.269	22.333	1.155	28	14	61	34	6	20	57	50	48	35	117	148	54	64	114	149
3662	NM_006142	chr1	27189632	27190947	+	SFN	H3K27me3-only	4.667	0.667	91.666	3.056	53	30	104	40	22	29	78	41	90	44	108	87	61	67	39	106
22416	NM_018066	chr1	27205872	27216869	-	GPN2	H3K4me3-only	248	29.761	11.666	0.625	36	20	57	48	29	54	71	58	67	57	108	91	29	82	86	106
15524	NM_022078	chr1	27216978	27226962	-	GPATCH3	H3K4me3-only	339.333	42.417	17	0.85	54	48	63	50	43	86	53	83	60	47	73	65	58	84	56	76
9163	NM_021969	chr1	27237974	27240567	-	NR0B2	Unmarked	1.667	0.385	25.667	1.351	38	34	80	45	22	49	87	49	49	43	91	94	88	81	19	130
15346	NM_006600	chr1	27248212	27273362	+	NUDC	H3K4me3-only	235.667	27.191	17.333	0.776	36	30	78	40	27	48	58	58	64	45	107	107	57	67	81	96
7453	NM_152365	chr1	27276046	27286901	-	C1orf172	H3K4me3-only	255.667	42.611	32.333	1.406	37	7	94	53	19	23	54	35	75	44	161	106	59	58	77	97
7723	NM_001013642	chr1	27320194	27327377	+	TRNP1	H3K4me3-only	189.333	33.41	31	1.292	26	23	74	29	13	25	68	42	67	35	165	128	46	65	88	105
13668	NM_052943	chr1	27331510	27339333	-	FAM46B	H3K4me3-only	255.333	45.056	18.667	0.812	46	20	69	38	15	36	64	67	58	47	120	105	55	78	77	104
11037	NR_046474	chr1	27425299	27481621	-	SLC9A1	H3K4me3-only	89	15.705	22	1.2	33	34	59	40	43	86	51	91	37	44	69	83	53	107	54	115
8369	NM_001276252	chr1	27561006	27635124	+	WDTC1	H3K4me3-only	125.333	28.925	28.333	1.977	24	10	89	29	18	26	61	38	71	55	164	113	39	52	89	121
14055	NR_037580	chr1	27648635	27662891	+	TMEM222	H3K4me3-only	238	25.501	18.333	0.733	64	34	78	42	26	35	59	53	66	45	116	98	62	59	71	91
14629	NR_033926	chr1	27650364	27653016	+	LOC644961	Unmarked	4.667	1.556	18	0.72	118	66	82	46	59	57	77	46	69	63	73	52	66	54	24	47
7527	NM_032872	chr1	27668482	27680423	+	SYTL1	H3K4me3-only	34	4.857	32	1.352	36	25	81	53	24	35	84	61	57	48	118	85	78	96	24	94
8849	NM_004672	chr1	27681669	27693337	-	MAP3K6	H3K4me3-only	141.667	22.37	26.666	1.159	20	31	76	27	15	39	60	63	64	36	113	115	55	71	80	134
10935	NM_003665	chr1	27695600	27701315	-	FCN3	Unmarked	2.333	0.538	22	1.031	88	40	75	45	21	32	84	59	65	43	115	61	73	82	10	106
5462	NM_207397	chr1	27705595	27709805	-	CD164L2	H3K4me3-only	51.333	7	49.667	2.403	28	16	72	46	19	25	75	55	50	51	122	99	65	82	53	141
9288	NM_005281	chr1	27719147	27722317	+	GPR3	H3K4me3-only	161.667	17.963	25.333	0.874	27	26	69	41	13	32	48	69	52	40	139	106	70	64	82	121
18287	NM_001201404	chr1	27730733	27816678	-	WASF2	H3K4me3-only	230	40.586	15	0.938	30	17	65	55	28	64	66	54	62	55	131	83	47	76	69	97
9132	NM_001029882	chr1	27860755	27930143	-	AHDC1	H3K4me3-only	245	45.94	25.667	1.203	16	8	119	33	5	23	37	42	100	34	192	114	55	43	91	87
1182	NM_005248	chr1	27938800	27961727	-	FGR	Bivalent	20	3.75	321	13.564	66	18	92	41	18	21	66	52	80	44	160	76	54	73	42	96
9523	NM_001042729	chr1	27938800	27953106	-	FGR	Unmarked	1	0.2	24.667	1.298	52	38	83	47	32	54	71	68	59	49	112	59	77	84	12	102
9610	NM_001042747	chr1	27938800	27952751	-	FGR	Unmarked	1	0.273	24.666	1.276	40	34	90	52	28	62	76	62	68	56	123	55	79	76	14	84
19021	NM_022873	chr1	27992571	27998724	-	IFI6	H3K4me3-only	30.667	4.6	14.666	0.786	78	58	86	37	41	60	94	54	74	49	83	68	66	82	11	58
9625	NM_001143915	chr1	28052489	28089423	+	FAM76A	H3K4me3-only	109.667	16.449	24.666	1.057	28	18	68	34	13	30	59	54	55	49	122	125	52	58	102	132
22594	NM_177424	chr1	28099693	28150963	+	STX12	H3K4me3-only	200	26.086	11.333	0.507	43	36	73	39	27	45	62	68	55	52	115	85	67	69	56	107
21271	NM_014110	chr1	28157251	28178183	+	PPP1R8	H3K4me3-only	204.667	38.377	12.666	0.585	64	20	71	51	25	59	65	53	65	39	85	98	52	84	66	102
21546	NM_138558	chr1	28157324	28178183	+	PPP1R8	H3K4me3-only	236	39.333	12.666	0.585	63	18	71	52	27	59	59	53	63	39	82	96	51	82	68	116
25753	NR_002997	chr1	28160911	28161077	+	SCARNA1	Unmarked	1.667	0.333	7.666	0.411	90	70	78	58	72	102	73	54	53	58	40	50	81	70	10	40
6225	NM_004848	chr1	28199054	28213193	+	THEMIS2	H3K4me3-only	139.667	19.046	41	1.984	27	29	66	43	16	39	67	61	68	47	154	92	54	69	73	94
4912	NM_002946	chr1	28218048	28241236	-	RPA2	H3K4me3-only	166	15.091	58.667	2.794	50	30	93	45	23	52	73	39	90	57	119	92	54	48	73	61
13844	NM_014474	chr1	28261503	28285663	+	SMPDL3B	H3K4me3-only	148.333	27.814	18.666	1.057	72	38	94	46	40	51	88	44	77	51	101	72	61	82	19	63
15887	NM_018053	chr1	28286503	28294604	+	XKR8	H3K4me3-only	159.667	19.958	17	0.573	23	15	55	36	16	33	73	55	45	44	137	127	44	86	88	122
20823	NM_001990	chr1	28296854	28415148	-	EYA3	H3K4me3-only	324.333	30.405	13	0.696	53	23	63	43	27	82	58	94	45	50	72	81	57	106	55	90
11756	NM_000952	chr1	28473676	28503455	-	PTAFR	Unmarked	2.667	0.421	21	1.105	22	36	48	41	21	112	65	120	33	38	60	60	71	133	18	121
15577	NM_001164722	chr1	28473676	28520447	-	PTAFR	Unmarked	2.333	0.583	17	0.962	28	31	73	47	12	45	75	84	47	42	97	74	91	98	15	140
15098	NM_014280	chr1	28526789	28559542	-	DNAJC8	H3K4me3-only	251	35.857	17.333	0.8	57	40	76	42	43	73	74	49	68	60	110	76	47	66	54	64
10427	NM_016311	chr1	28562601	28564616	+	ATPIF1	H3K4me3-only	291.333	62.424	23	1.131	50	44	58	42	25	53	63	76	58	42	82	87	62	78	66	113
11402	NM_031459	chr1	28585962	28609002	+	SESN2	H3K4me3-only	230.333	30.042	21.333	1.422	44	25	66	39	18	49	54	67	67	44	106	94	45	69	86	126
17582	NM_017638	chr1	28655512	28662478	+	MED18	H3K4me3-only	137.667	19.667	15.666	0.77	51	46	65	38	42	104	57	79	54	50	75	72	53	82	55	76
12600	NM_001048183	chr1	28696092	28826881	+	PHACTR4	H3K4me3-only	156	24.633	19.999	1.2	52	29	77	42	34	66	57	56	61	47	112	83	54	71	57	101
26115	NM_023923	chr1	28764660	28826881	+	PHACTR4	Unmarked	4.333	1.3	7	0.457	104	69	70	55	51	102	92	53	73	63	44	35	71	64	9	44
10690	NM_001048199	chr1	28832454	28865708	+	RCC1	H3K4me3-only	393.333	42.144	22.333	0.848	37	47	67	46	39	93	64	80	54	56	66	75	67	81	53	74
10753	NR_002909	chr1	28832454	28837404	+	SNHG3	H3K4me3-only	393.333	42.144	22.333	0.848	37	47	67	46	39	93	64	80	54	56	66	75	67	81	53	74
18142	NM_001048194	chr1	28844744	28865708	+	RCC1	H3K4me3-only	131.334	17.13	15.333	0.613	28	23	63	31	18	53	54	61	49	48	124	119	50	62	99	117
21038	NM_017846	chr1	28879528	28905057	+	TRNAU1AP	H3K4me3-only	209.333	36.939	13	0.83	49	32	83	32	33	52	72	50	67	69	111	85	47	54	67	96
8074	NR_024127	chr1	28905049	28908366	-	SNHG12	H3K4me3-only	346.667	43.333	29.333	1.1	39	24	62	46	23	47	63	59	59	43	122	110	49	78	87	88
19281	NR_003077	chr1	28905254	28905334	-	SNORD99	Unmarked	5	1	14.333	0.651	81	65	83	53	52	78	81	46	69	53	71	52	79	61	11	64
16325	NR_002987	chr1	28906275	28906405	-	SNORA61	H3K4me3-only	27	4.263	16.666	0.667	55	55	71	36	60	105	93	67	52	78	72	48	50	88	14	55
10502	NR_002976	chr1	28906892	28907024	-	SNORA44	H3K4me3-only	148.667	22.299	22.667	0.829	56	54	69	55	34	97	89	61	65	58	79	54	79	73	18	58
8350	NR_003035	chr1	28907431	28907565	-	SNORA16A	H3K4me3-only	411.667	58.81	28.333	1.09	62	53	74	54	44	77	87	49	73	61	95	57	64	67	29	53
5220	NM_152304	chr1	28918711	28921088	+	RAB42	H3K4me3-only	60.667	16.544	53.333	2.712	38	19	75	43	23	35	70	50	62	54	147	99	52	69	71	92
5280	NM_001193532	chr1	28919006	28921088	+	RAB42	Bivalent	98.333	24.583	52.333	3.019	27	15	79	39	20	33	55	48	68	45	177	107	46	62	86	92
19293	NM_001135218	chr1	28929608	28969604	-	TAF12	H3K4me3-only	306	28.689	14.333	0.614	64	33	94	60	29	29	59	54	90	51	114	75	68	58	63	58
22122	NR_004407	chr1	28975111	28975246	+	RNU11	H3K4me3-only	43.667	5.24	12	0.632	84	51	73	47	51	106	75	51	58	63	56	64	62	63	38	57
18212	NM_006582	chr1	28995239	29042115	+	GMEB1	H3K4me3-only	118.333	22.189	15	0.738	45	24	64	34	25	39	50	44	57	39	169	118	41	56	100	94
16698	NM_001173128	chr1	29063132	29096287	+	YTHDF2	H3K4me3-only	163	27.167	16.333	0.69	41	31	64	22	27	67	63	77	57	59	108	93	33	77	82	98
16562	NM_016258	chr1	29063135	29096287	+	YTHDF2	H3K4me3-only	164	27.333	16.333	0.69	40	31	64	22	27	67	64	77	57	59	108	93	33	77	82	98
19756	NM_001172828	chr1	29063451	29096287	+	YTHDF2	H3K4me3-only	294.667	42.095	14	0.568	22	14	67	17	15	50	50	81	48	52	113	121	34	80	105	130
1385	NM_000911	chr1	29138653	29190208	+	OPRD1	Bivalent	65	17.726	280.667	12.758	28	26	63	36	19	28	50	57	51	41	140	133	55	59	112	101
4508	NM_203342	chr1	29213602	29446558	+	EPB41	Bivalent	156.333	26.055	66.334	3.491	38	24	75	49	25	31	48	71	64	54	124	72	59	66	66	133
8553	NM_001166006	chr1	29241087	29391733	+	EPB41	H3K4me3-only	170.667	28.445	27.666	1.482	26	10	72	31	19	40	48	56	56	44	153	124	39	69	104	108
2160	NM_001171868	chr1	29445936	29449013	-	TMEM200B	Bivalent	103.667	34.556	181	9.362	24	16	61	33	9	21	54	50	59	27	168	134	42	70	105	126
2271	NM_001003682	chr1	29445936	29450421	-	TMEM200B	Bivalent	141.333	30.283	168.667	7.667	16	12	51	30	4	37	70	68	52	49	172	111	37	81	92	117
19558	NM_005626	chr1	29474249	29508637	-	SRSF4	H3K4me3-only	131.333	17.91	14	0.646	72	28	62	43	34	42	50	65	52	46	97	108	47	75	94	84
8541	NM_001024732	chr1	29519384	29557454	-	MECR	H3K4me3-only	168.333	42.083	27.667	1.66	62	37	81	47	41	48	63	49	64	52	114	82	60	64	54	81
787	NM_133178	chr1	29563027	29653325	+	PTPRU	Bivalent	142.333	13.775	421.666	14.54	29	20	66	31	17	23	88	47	62	79	122	121	38	53	108	95
11999	NM_002379	chr1	31184123	31196432	-	MATN1	Unmarked	3.333	0.714	20.666	0.925	28	26	94	36	15	28	91	42	61	42	156	102	79	80	21	98
9646	NR_034182	chr1	31191618	31199593	+	MATN1-AS1	H3K4me3-only	105.667	16.685	24.333	0.948	10	14	40	40	4	15	66	86	50	30	82	121	40	112	95	194
13990	NM_006762	chr1	31205314	31230683	-	LAPTM5	Unmarked	2.666	0.5	18.333	0.917	51	34	72	37	20	38	106	68	61	65	94	74	62	95	22	100
8529	NR_039616	chr1	31212002	31212079	-	MIR4420	Unmarked	3.333	0.588	27.667	1.361	40	37	76	45	21	60	105	75	69	65	87	58	69	99	10	83
3616	NM_014654	chr1	31342312	31381480	-	SDC3	Bivalent	85	42.5	93.333	3.944	11	11	34	27	6	13	38	50	37	20	154	160	29	63	144	202
21363	NM_014676	chr1	31404352	31538564	-	PUM1	H3K4me3-only	200.667	33.444	12.666	0.76	42	30	73	29	20	60	72	48	58	57	118	106	53	54	76	103
21698	NR_003066	chr1	31441009	31441084	-	SNORD85	Unmarked	5	0.6	12.333	0.587	65	78	74	42	67	125	93	48	64	65	58	46	63	64	8	39
3257	NM_024522	chr1	31652591	31712734	-	NKAIN1	Bivalent	168.667	28.111	107.667	4.821	33	17	69	39	17	25	59	52	50	44	121	131	57	67	97	121
14080	NM_004814	chr1	31732414	31769644	-	SNRNP40	H3K4me3-only	409.333	51.167	18.333	0.902	52	31	90	46	30	43	58	54	64	44	78	102	73	67	62	105
15961	NM_016505	chr1	31769841	31837780	+	ZCCHC17	H3K4me3-only	385.667	52.593	16.667	0.862	36	29	68	40	21	53	79	64	61	45	99	102	55	91	60	96
6513	NM_004102	chr1	31838099	31845923	-	FABP3	H3K4me3-only	95	11.875	38.666	1.208	38	29	93	38	30	44	74	52	69	48	144	87	60	79	38	76
8965	NM_001199038	chr1	31882411	31907527	+	SERINC2	Unmarked	3	0.6	26.333	1.339	57	72	70	42	40	60	100	59	67	52	93	62	77	75	11	62
7275	NM_001199037	chr1	31883020	31907527	+	SERINC2	Unmarked	3.333	1.429	33.333	1.639	54	62	96	40	38	58	84	58	80	49	99	60	80	70	9	62
5890	NM_178865	chr1	31885962	31907527	+	SERINC2	H3K4me3-only	173.333	74.296	44.333	1.985	28	19	61	40	16	47	63	63	53	47	114	106	51	76	82	133
6705	NM_018565	chr1	31886659	31907527	+	SERINC2	H3K4me3-only	333.667	66.733	37	1.657	9	9	45	23	9	49	66	103	39	67	114	93	29	103	88	153
12461	NR_034112	chr1	31971838	31974167	+	LOC149086	Unmarked	1.333	0.571	20	1.277	42	50	67	42	34	59	122	59	51	90	87	64	74	74	17	67
14429	NR_027085	chr1	31984035	31989846	+	LOC284551	Unmarked	0.333	0.1	18	1.286	81	90	64	52	78	94	82	51	60	53	60	38	68	67	5	56
7250	NM_001204414	chr1	32042085	32053287	+	TINAGL1	Unmarked	15.667	2.137	33.333	1.724	41	27	105	52	24	38	52	51	73	43	127	70	87	57	30	122
7614	NM_001204415	chr1	32043745	32053287	+	TINAGL1	Unmarked	2.667	0.727	31.333	1.649	38	59	68	23	42	95	144	67	48	124	53	46	59	71	6	56
2512	NM_001525	chr1	32083300	32092919	+	HCRTR1	Bivalent	115	34.503	151.666	7.222	30	22	82	27	12	12	63	57	67	40	141	110	52	70	72	142
11961	NR_033686	chr1	32095462	32110838	-	PEF1	H3K4me3-only	207.333	25.917	20.666	0.713	57	42	66	69	35	48	47	72	60	41	67	65	83	71	53	123
13190	NR_033688	chr1	32095462	32110218	-	PEF1	H3K4me3-only	346.667	34.667	19.333	0.598	41	34	81	49	21	51	56	68	65	56	91	81	77	55	66	107
5435	NM_001856	chr1	32117847	32169768	-	COL16A1	H3K4me3-only	86	16.126	50	1.829	27	16	87	42	21	24	60	68	67	37	132	85	57	96	42	138
3285	NM_001703	chr1	32192717	32229648	-	BAI2	Bivalent	109.667	82.271	106.667	5.517	21	13	45	29	14	25	34	60	41	22	123	154	32	73	138	175
9967	NR_036216	chr1	32224260	32224336	-	MIR4254	Unmarked	4	0.462	23.667	0.826	34	45	76	25	25	44	124	58	65	77	129	69	56	86	11	75
11657	NM_144569	chr1	32256024	32281580	-	SPOCD1	H3K4me3-only	54.333	6.269	21	1.05	81	47	79	50	45	40	66	60	68	41	93	61	63	83	25	97
6746	NM_080391	chr1	32372021	32403988	-	PTP4A2	H3K4me3-only	117	21.939	36.667	1.897	18	12	83	36	6	16	40	39	64	35	141	154	62	38	130	125
26958	NM_001195101	chr1	32372021	32385259	-	PTP4A2	Unmarked	2	1	5.333	0.333	67	70	65	44	58	147	76	63	53	52	47	52	68	76	15	46
9889	NM_001271878	chr1	32479294	32509482	+	KHDRBS1	H3K4me3-only	266.667	38.095	24	1.143	25	17	47	47	8	41	39	102	42	41	80	105	60	91	103	151
16180	NM_018056	chr1	32538502	32568467	+	TMEM39B	H3K4me3-only	224.333	30.592	16.666	0.847	40	26	85	38	22	31	64	42	83	45	163	105	44	58	83	70
14227	NM_012316	chr1	32573643	32642168	+	KPNA6	H3K4me3-only	310	54.703	18.333	0.887	87	27	76	37	36	52	66	61	57	57	106	80	46	80	52	79
18643	NM_175852	chr1	32645344	32663886	+	TXLNA	H3K4me3-only	128	20.212	14.667	0.557	30	24	68	31	16	42	69	53	62	51	133	116	45	63	92	104
7722	NM_024296	chr1	32666201	32670991	+	CCDC28B	H3K4me3-only	124.667	18.699	31	1.12	52	36	75	46	30	55	71	75	64	48	87	70	63	92	37	98
5318	NM_018134	chr1	32671235	32674288	+	IQCC	H3K4me3-only	220.667	27.583	51.667	2.279	33	23	65	52	20	40	57	61	64	42	121	96	56	73	79	117
11886	NM_001099434	chr1	32674694	32681797	+	DCDC2B	Unmarked	1.666	0.312	20.667	1.24	66	45	77	52	42	54	92	53	59	59	91	62	72	83	12	80
16286	NM_019118	chr1	32681797	32687926	-	TMEM234	H3K4me3-only	339.333	29.085	16.666	0.602	41	28	65	46	28	41	61	72	54	49	106	83	57	84	61	123
16271	NM_003757	chr1	32687970	32697205	+	EIF3I	H3K4me3-only	343	28.583	16.666	0.602	41	29	83	46	29	41	61	53	70	49	124	84	58	65	60	106
7389	NR_026850	chr1	32697260	32707311	-	MTMR9LP	H3K4me3-only	90	33.746	32.667	1.607	46	32	68	42	28	57	69	74	55	56	94	80	59	83	54	102
12096	NM_032648	chr1	32712817	32714461	+	FAM167B	Unmarked	1	0.143	20.333	0.871	44	31	86	51	17	40	73	75	63	34	105	73	88	100	12	107
6862	NM_005356	chr1	32716839	32751766	+	LCK	Unmarked	3	0.5	36	1.459	36	27	90	41	20	30	97	52	71	57	131	86	67	85	27	82
6203	NM_001042771	chr1	32739711	32751766	+	LCK	H3K4me3-only	32.667	3.92	41.333	1.393	71	44	97	44	33	50	77	52	81	52	132	52	70	67	11	66
21033	NM_004964	chr1	32757707	32799224	+	HDAC1	H3K4me3-only	250.667	41.778	13	0.722	32	23	78	37	21	58	64	54	87	42	144	88	30	74	75	92
5681	NM_023009	chr1	32799429	32801840	-	MARCKSL1	H3K4me3-only	185	61.667	47	2.043	14	18	62	30	16	23	39	49	48	25	145	141	46	61	112	170
3511	NM_001167676	chr1	32826870	32827844	-	FAM229A	Bivalent	40	8	97.667	3.855	17	21	65	40	13	29	63	57	56	43	112	118	57	69	90	149
3515	NM_052841	chr1	32827861	32829924	+	TSSK3	Bivalent	39	7.8	97.334	3.842	30	22	70	44	12	18	58	53	60	39	154	116	64	62	87	110
19938	NM_001143889	chr1	32830704	32860062	-	BSDC1	H3K4me3-only	322	37.152	13.667	0.562	50	35	83	35	19	36	74	62	74	53	130	89	60	67	59	73
9280	NM_001145720	chr1	32930657	32953459	+	ZBTB8B	H3K4me3-only	239.333	37.791	25.333	1.188	41	29	60	39	21	54	72	58	53	48	113	103	53	74	73	108
6763	NM_001040441	chr1	33004771	33071542	+	ZBTB8A	H3K4me3-only	125.333	26.855	36.334	1.787	88	52	53	48	61	80	63	58	45	51	73	73	47	79	54	74
10696	NM_178547	chr1	33087306	33116185	-	ZBTB8OS	H3K4me3-only	293.333	58.667	22.333	1.34	66	44	82	41	47	79	57	64	66	63	81	65	54	60	55	75
9984	NM_001135255	chr1	33116748	33151812	+	RBBP4	H3K4me3-only	233.333	58.333	23.667	1.268	53	27	60	38	23	49	55	67	59	45	98	102	43	74	91	115
9926	NM_001135256	chr1	33116958	33151812	+	RBBP4	H3K4me3-only	291.667	54.691	24	1.263	38	25	66	30	17	43	63	62	61	52	116	114	43	65	99	105
2018	NM_030786	chr1	33145506	33168361	-	SYNC	Bivalent	61.333	14.155	195	7.597	27	14	62	35	13	32	51	52	48	42	148	110	50	60	88	167
4592	NM_020888	chr1	33207511	33240571	+	KIAA1522	H3K4me3-only	156	52	64.667	2.587	29	7	48	31	4	18	33	59	43	23	137	136	38	66	121	206
15126	NM_001198972	chr1	33231234	33240571	+	KIAA1522	H3K4me3-only	105.667	13.208	17.333	0.642	21	31	68	31	28	39	100	62	52	54	131	91	50	104	29	108
14764	NM_003680	chr1	33240839	33283633	-	YARS	H3K4me3-only	285.333	65.851	17.667	0.869	48	19	66	51	15	33	36	69	56	27	106	91	65	73	72	172
13287	NM_001256121	chr1	33283042	33324480	+	S100PBP	H3K4me3-only	362.667	45.333	19	0.95	39	20	75	40	13	35	64	56	68	44	140	98	54	68	72	113
13102	NM_022753	chr1	33283118	33324480	+	S100PBP	H3K4me3-only	343.333	49.048	19.333	0.935	31	19	73	33	13	31	64	60	64	48	145	103	48	70	78	119
1614	NM_001171940	chr1	33327868	33336414	-	FNDC5	Bivalent	62.667	15.667	244.333	7.635	21	9	62	32	16	22	41	61	43	36	147	124	44	73	100	168
2365	NM_001171941	chr1	33327868	33338093	-	FNDC5	H3K27me3-only	8.667	1.04	162.667	5.951	67	27	93	37	21	37	65	74	73	39	118	65	63	94	19	107
3273	NM_002143	chr1	33352097	33360247	+	HPCA	H3K27me3-only	11.667	2.917	107.333	5.367	13	13	75	22	7	23	54	61	61	40	188	116	42	70	87	127
1624	NM_033504	chr1	33360195	33366953	-	TMEM54	Bivalent	85.333	17.067	243	10.72	21	8	73	41	10	24	40	48	58	26	166	132	55	64	102	131
6350	NM_153341	chr1	33402049	33430286	-	RNF19B	H3K4me3-only	154.333	33.076	39.667	2.245	26	21	63	29	14	20	63	42	56	33	123	157	43	65	120	124
7543	NM_001625	chr1	33476825	33502512	-	AK2	H3K4me3-only	148	20.183	31.667	1.462	54	42	64	39	38	73	81	51	64	66	115	74	44	61	59	74
1951	NM_052998	chr1	33546713	33585995	+	ADC	Bivalent	88	26.403	202.334	14.806	59	27	85	39	29	40	65	48	77	46	136	89	45	68	62	84
5828	NM_018207	chr1	33611002	33647671	-	TRIM62	H3K4me3-only	123	30.75	45.333	2.473	37	34	60	34	29	60	48	73	46	33	105	92	53	84	62	149
9297	NM_152493	chr1	33722173	33766320	+	ZNF362	H3K4me3-only	155.333	116.529	25.333	1.246	22	9	55	17	6	21	51	30	39	39	162	186	37	39	158	128
11694	NM_001080438	chr1	33772366	33786699	-	A3GALT2	Unmarked	2.667	0.381	21	1.34	62	29	94	51	29	42	74	55	75	46	106	60	71	82	13	110
738	NM_004427	chr1	33789223	33815499	-	PHC2	Bivalent	108.667	20.376	441	23.211	19	8	56	28	10	15	39	58	45	41	128	146	37	57	137	175
13341	NM_198040	chr1	33789223	33841194	-	PHC2	Unmarked	2.333	0.5	19	1.188	78	71	76	64	65	48	81	49	55	63	58	54	92	61	15	69
7737	NR_037400	chr1	33797993	33798093	-	MIR3605	Unmarked	1	0.107	31	1.368	60	45	67	54	32	46	84	76	64	49	88	57	70	98	19	90
12353	NM_145238	chr1	33938231	33961995	+	ZSCAN20	H3K4me3-only	92	12.546	20	0.8	52	41	88	31	34	55	70	68	79	62	131	58	46	70	41	73
7963	NM_052896	chr1	33979608	34631443	-	CSMD2	H3K4me3-only	96.333	12.565	30	1.304	60	37	71	57	36	56	86	46	76	69	99	51	53	61	40	101
24802	NM_145205	chr1	34326075	34330392	+	HMGB4	Unmarked	1.667	0.385	9	0.628	74	81	64	44	66	117	82	73	48	69	49	33	75	70	5	49
14263	NR_033264	chr1	34329679	34330392	+	HMGB4	Unmarked	2.333	0.412	18.333	1.018	106	60	79	61	41	55	72	56	74	34	58	57	85	75	14	72
14423	NR_038372	chr1	34334556	34351059	+	LOC402779	Unmarked	1.667	0.455	18	1.038	102	60	98	46	41	58	78	43	86	51	95	53	77	51	13	47
7485	NM_032884	chr1	34632623	34684731	+	C1orf94	H3K4me3-only	82.667	10.782	32	1.371	39	23	79	31	13	48	81	59	62	44	140	87	58	87	32	116
3873	NM_001134734	chr1	34642552	34684731	+	C1orf94	Bivalent	39.667	9.155	83.334	3.378	38	22	73	38	21	44	64	47	58	41	134	109	54	69	72	115
8435	NM_005268	chr1	35220647	35224113	+	GJB5	Unmarked	3	0.375	28	1.183	49	32	100	38	28	40	75	59	66	46	119	77	76	84	15	95
7312	NM_153212	chr1	35225341	35229325	+	GJB4	Unmarked	4	0.343	33	1.151	67	37	125	41	30	26	63	47	87	41	116	72	86	62	12	87
3481	NM_024009	chr1	35246789	35251965	+	GJB3	Bivalent	107.333	18.94	98.334	5.784	57	39	78	52	45	46	57	51	55	47	85	84	70	67	51	115
3683	NM_001005752	chr1	35247910	35251967	+	GJB3	Bivalent	40.333	11.002	90.667	4.25	52	25	102	35	23	40	61	65	74	49	136	68	65	76	27	101
4061	NM_002060	chr1	35258598	35261348	+	GJA4	Bivalent	55.667	11.928	77.333	3.412	38	27	73	48	22	45	51	64	54	37	92	86	72	74	52	164
16936	NM_001164824	chr1	35315962	35324646	-	SMIM12	H3K4me3-only	261.667	35.683	16	0.857	41	50	84	47	45	100	85	47	80	57	101	60	56	69	28	49
18219	NM_138428	chr1	35315962	35325417	-	SMIM12	H3K4me3-only	254.333	40.16	15	0.714	49	38	79	50	38	62	57	64	63	47	103	77	66	73	52	81
18244	NM_001164825	chr1	35315962	35325338	-	SMIM12	H3K4me3-only	286	42.898	15	0.738	47	32	79	46	31	56	58	70	64	50	110	78	61	77	56	84
17219	NM_001080418	chr1	35331036	35370984	-	DLGAP3	Unmarked	2.333	0.778	15.999	1.333	48	53	76	42	43	69	82	40	59	47	102	72	69	65	20	112
14079	NR_037869	chr1	35441299	35444307	-	LOC653160	Unmarked	1.333	0.333	18.333	1.122	57	43	100	40	44	62	84	56	65	69	91	59	75	72	8	74
8907	NM_001195156	chr1	35447126	35450948	-	ZMYM6NB	H3K4me3-only	145.667	31.212	26.333	1.549	40	36	66	39	34	57	67	58	58	44	124	89	49	79	59	100
15728	NM_007167	chr1	35451766	35497569	-	ZMYM6	H3K4me3-only	211.333	48.773	17	0.911	94	46	85	37	41	58	66	54	69	56	105	75	58	59	49	47
17167	NM_024772	chr1	35544971	35581455	+	ZMYM1	H3K4me3-only	198.667	35.057	16	0.842	54	39	67	42	41	84	59	79	56	45	78	73	51	94	49	88
13329	NM_005066	chr1	35649200	35658743	-	SFPQ	H3K4me3-only	264.667	52.933	19	1	47	44	73	44	27	53	47	70	47	39	72	106	87	60	72	111
18090	NM_005095	chr1	35734567	35887545	+	ZMYM4	H3K4me3-only	224.667	26.961	15.333	0.719	32	28	79	27	21	47	55	50	61	51	172	96	52	47	75	106
10740	NM_024874	chr1	35899090	36023037	-	KIAA0319L	H3K4me3-only	326.667	65.333	22.333	1.155	11	16	78	18	11	33	69	58	56	44	164	122	45	78	76	120
11535	NM_001014839	chr1	36023392	36032380	+	NCDN	H3K4me3-only	314.667	59.004	21.333	1.164	31	36	62	47	15	37	54	74	63	33	91	98	67	74	78	139
235	NM_178548	chr1	36038970	36060927	+	TFAP2E	Bivalent	79.667	11.949	776.333	28.753	43	33	66	47	26	33	61	55	66	31	90	109	54	78	79	128
20500	NM_002794	chr1	36065142	36107445	-	PSMB2	H3K4me3-only	229	38.167	13.333	0.727	50	43	61	51	40	115	62	68	51	49	59	73	64	78	51	84
21425	NM_001199779	chr1	36065142	36107152	-	PSMB2	H3K4me3-only	341.333	60.232	12.666	0.667	46	44	71	47	41	68	67	59	62	55	82	81	59	68	61	88
25540	NM_001199780	chr1	36065142	36097138	-	PSMB2	Unmarked	1	0.231	8	0.522	70	62	67	50	67	123	74	66	46	59	53	46	66	85	10	55
7432	NM_152374	chr1	36179476	36184790	-	C1orf216	H3K4me3-only	112.333	30.633	32.333	1.672	62	29	90	47	30	29	54	39	84	43	124	94	52	50	78	94
20106	NM_001190481	chr1	36197712	36235551	-	CLSPN	H3K4me3-only	177.333	26.599	13.666	0.788	41	32	72	41	29	27	53	62	60	42	121	99	56	70	76	118
10650	NM_017629	chr1	36273827	36323490	+	AGO4	H3K4me3-only	201	33.5	22.666	1.062	18	15	51	39	6	23	44	45	66	34	171	129	32	46	134	146
10984	NM_012199	chr1	36348809	36389899	+	AGO1	H3K4me3-only	232.333	53.619	22	1.031	31	24	76	32	16	31	85	40	71	57	163	104	45	60	72	92
20458	NM_024852	chr1	36396682	36522063	+	AGO3	H3K4me3-only	318	86.719	13.333	0.93	20	15	58	30	17	28	40	78	43	55	121	123	43	66	123	139
6539	NM_014466	chr1	36549675	36553876	+	TEKT2	H3K4me3-only	78	18.001	38.333	1.855	68	27	77	38	22	45	59	42	65	41	148	91	55	55	61	105
9441	NM_017825	chr1	36554452	36559533	+	ADPRHL2	H3K4me3-only	237.667	27.422	25	0.949	26	17	72	35	12	15	69	52	61	49	162	120	52	67	89	101
21316	NM_005202	chr1	36560843	36565850	-	COL8A2	Unmarked	4.667	0.933	12.666	0.717	55	40	70	39	27	55	95	60	58	53	105	77	63	89	24	89
2911	NM_001270895	chr1	36602169	36621654	-	TRAPPC3	Bivalent	190.667	40.854	125	5.357	19	11	51	31	12	21	43	71	37	39	143	131	45	76	112	157
8410	NM_001270896	chr1	36602169	36615115	-	TRAPPC3	H3K4me3-only	142.333	14.233	28	1.077	53	25	84	44	28	46	71	41	69	60	130	100	56	55	73	64
3026	NM_018067	chr1	36621802	36646441	+	MAP7D1	Bivalent	208	41.6	118	4.849	19	12	62	39	13	17	48	37	66	31	159	137	34	55	124	146
18481	NM_005119	chr1	36690016	36770957	+	THRAP3	H3K4me3-only	303	36.361	15	0.643	39	17	73	37	20	61	50	78	52	51	116	88	55	80	68	114
10975	NM_001162530	chr1	36771993	36786948	+	SH3D21	H3K4me3-only	122	20.333	22	1.158	34	12	73	40	19	31	71	46	59	40	126	115	47	85	69	132
10400	NM_024676	chr1	36772707	36786948	+	SH3D21	H3K4me3-only	190.333	27.19	23	1.095	32	21	78	31	11	23	80	41	84	46	162	113	36	64	85	92
3345	NM_018166	chr1	36787631	36789755	-	EVA1B	Bivalent	59.333	10.47	104	6	36	25	82	35	17	42	60	70	52	43	131	91	73	78	44	120
12973	NM_032017	chr1	36805224	36851485	-	STK40	H3K4me3-only	193	41.354	19.333	0.69	39	28	74	31	19	31	53	55	59	41	154	111	54	59	84	107
15240	NM_032881	chr1	36859030	36863493	-	LSM10	H3K4me3-only	221	26.521	17.333	0.881	46	39	69	40	28	67	64	69	58	43	83	94	62	78	62	97
12011	NM_145047	chr1	36883506	36916086	-	OSCP1	H3K4me3-only	112.333	13.48	20.666	0.969	48	30	62	61	23	54	46	73	51	31	70	84	79	80	58	149
4619	NM_031280	chr1	36921361	36930040	-	MRPS15	Bivalent	309.333	66.281	64	3.623	62	42	87	53	42	41	54	46	71	56	120	75	68	44	62	76
12858	NM_156039	chr1	36931643	36948915	-	CSF3R	Unmarked	1.333	0.364	19.666	1.475	75	45	97	44	35	59	69	49	71	42	98	67	80	66	14	88
595	NM_000831	chr1	37261127	37499844	-	GRIK3	Bivalent	57	12.216	504	26.069	13	14	74	21	9	18	52	45	65	43	168	147	35	48	129	118
20965	NR_036217	chr1	37627163	37627235	+	MIR4255	Unmarked	1.666	0.416	13	0.929	82	68	89	45	50	75	72	73	67	50	62	48	86	77	3	52
4164	NR_038842	chr1	37920479	37940044	-	LOC728431	Bivalent	159	26.5	74.666	3.556	33	17	55	59	21	28	48	53	57	41	126	106	53	64	101	137
4180	NM_025079	chr1	37940118	37949978	+	ZC3H12A	Bivalent	169.333	24.19	74	3.524	23	17	61	40	17	32	52	60	52	55	137	110	49	56	105	133
9543	NM_001270875	chr1	37955560	37980420	-	MEAF6	H3K4me3-only	173	47.178	24.667	1.298	45	22	93	30	18	24	50	35	79	36	153	134	48	45	106	81
24592	NR_049844	chr1	37966535	37966595	-	MIR5581	Unmarked	0.667	0.182	9.333	0.718	76	75	69	40	67	117	92	58	64	66	59	40	53	77	8	38
11751	NM_024700	chr1	38000049	38019945	-	SNIP1	H3K4me3-only	251.333	58.004	21	1.34	45	28	77	47	27	86	73	53	62	65	86	80	63	59	57	91
10144	NM_003462	chr1	38022519	38032458	+	DNALI1	H3K4me3-only	73.667	8.84	23.333	1.029	89	38	96	61	24	46	60	51	92	39	106	59	79	58	34	67
17459	NM_013285	chr1	38032412	38061586	-	GNL2	H3K4me3-only	240.333	37.949	15.666	0.922	72	30	90	51	32	45	66	53	78	58	129	73	60	63	54	45
271	NM_001242910	chr1	38076950	38100595	-	RSPO1	Bivalent	36.333	7.267	743.334	35.967	23	20	77	29	8	34	62	64	75	43	153	104	43	70	83	111
12749	NM_017850	chr1	38147241	38156192	-	C1orf109	H3K4me3-only	202.667	25.333	19.666	0.641	60	29	90	56	31	62	60	51	69	53	86	81	76	59	53	83
10856	NM_018101	chr1	38158072	38175391	+	CDCA8	H3K4me3-only	276	35.998	22.333	0.944	27	17	72	40	22	37	65	63	53	52	110	106	54	81	74	126
1728	NM_001099439	chr1	38181645	38230824	-	EPHA10	Bivalent	34.333	4.905	228.666	10.088	40	24	97	40	16	36	75	47	88	35	126	95	56	79	47	98
2071	NM_001031740	chr1	38259773	38267278	+	MANEAL	Bivalent	141	32.541	189.667	9.811	15	10	47	42	9	19	57	48	44	30	124	153	46	74	123	158
2821	NM_152496	chr1	38261159	38267278	+	MANEAL	H3K27me3-only	19.667	2.565	131.333	7.036	33	30	83	29	28	76	88	69	55	67	116	80	59	88	31	67
17659	NM_024640	chr1	38268613	38273865	-	YRDC	H3K4me3-only	270	67.5	15.666	0.94	10	9	57	24	10	19	56	56	46	42	130	150	34	72	125	159
16647	NM_001142726	chr1	38273472	38275126	+	C1orf122	H3K4me3-only	299.667	59.933	16.333	0.961	28	23	68	45	24	44	41	60	44	34	102	125	67	68	95	131
14117	NM_005955	chr1	38275238	38325292	-	MTF1	H3K4me3-only	392	36.749	18.333	0.625	31	19	54	38	15	64	71	70	55	45	129	83	41	93	57	134
18500	NM_005540	chr1	38326368	38412729	-	INPP5B	H3K4me3-only	135	14.465	15	0.6	72	40	95	55	35	34	75	47	79	49	115	55	76	68	13	91
17847	NM_006802	chr1	38422651	38455761	-	SF3A3	H3K4me3-only	259.333	29.922	15.333	0.885	55	28	67	49	21	59	65	74	56	46	74	88	67	85	59	106
7579	NM_004468	chr1	38462441	38471187	-	FHL3	H3K4me3-only	94.667	47.334	31.667	1.638	24	11	75	31	10	18	46	47	70	40	199	111	37	52	101	127
14797	NM_016037	chr1	38478383	38490497	+	UTP11L	H3K4me3-only	265	34.564	17.667	0.716	58	38	79	49	49	57	74	46	59	62	86	86	58	69	54	75
1598	NM_002699	chr1	38509522	38512450	-	POU3F1	Bivalent	85	25.503	247	13.473	15	16	60	39	9	10	39	19	47	25	203	175	59	25	149	109
8941	NR_037432	chr1	38554902	38555001	+	MIR3659	Unmarked	1.333	0.182	26.333	1.082	41	58	47	52	47	75	133	52	36	92	59	66	73	82	15	71
8801	NR_038928	chr1	38674705	38680439	-	LOC339442	Unmarked	2	0.3	26.667	1.356	61	46	82	63	30	46	75	68	72	50	91	58	89	78	22	68
20960	NM_022157	chr1	39303868	39325495	-	RRAGC	H3K4me3-only	260	78.008	13	0.848	23	29	72	30	22	30	51	63	54	42	168	118	55	65	92	85
18557	NR_037632	chr1	39328161	39339050	-	MYCBP	H3K4me3-only	242	45.378	15	0.703	47	23	75	42	22	21	57	64	55	48	122	108	62	72	80	101
27455	NR_037635	chr1	39328161	39347298	-	GJA9-MYCBP	Unmarked	2.333	1	4.333	0.325	121	105	57	46	94	135	72	51	48	45	31	37	66	67	1	23
27398	NM_030772	chr1	39339738	39347298	-	GJA9	Unmarked	2.333	1	4.333	0.325	121	105	57	46	94	135	72	51	48	45	31	37	66	67	1	23
14287	NM_017821	chr1	39351478	39407456	-	RHBDL2	Unmarked	11	1.32	18	1	45	32	104	37	21	53	71	54	80	38	129	77	72	75	20	91
13817	NM_001136275	chr1	39456915	39471737	+	AKIRIN1	H3K4me3-only	184	30.667	18.666	0.875	31	22	60	39	12	50	59	46	48	29	130	118	61	66	77	151
15150	NM_001184979	chr1	39491966	39500308	+	NDUFS5	H3K4me3-only	280.333	20.512	17.333	0.619	37	35	61	37	30	91	65	98	43	48	74	79	60	110	44	87
5231	NM_012090	chr1	39549838	39952810	+	MACF1	Unmarked	2.666	0.666	53.333	2.353	61	60	84	44	45	66	75	65	68	53	73	59	75	72	20	79
17721	NM_015038	chr1	39875175	39882154	+	KIAA0754	H3K4me3-only	196	41.997	15.334	0.613	55	31	77	39	24	44	67	29	75	26	123	128	48	63	84	86
1315	NM_181809	chr1	39957317	39995541	+	BMP8A	Bivalent	65.333	13.999	295	15.526	11	7	46	47	3	9	48	39	50	32	145	163	47	51	150	151
23375	NR_003929	chr1	39987951	40025370	-	PPIEL	H3K4me3-only	110.667	23.713	10.666	0.593	63	36	71	45	26	44	84	59	70	57	108	76	56	76	48	80
14945	NM_003819	chr1	40026484	40042521	-	PABPC4	H3K4me3-only	123.667	74.23	17.666	1.359	63	30	47	26	28	45	44	66	40	48	94	115	35	61	111	146
22389	NR_002983	chr1	40033045	40033182	-	SNORA55	Unmarked	1.667	1.251	11.666	1.207	71	73	69	43	52	117	86	54	75	51	77	43	58	69	13	48
2691	NM_014571	chr1	40089102	40105348	-	HEYL	Bivalent	140.667	26.377	139	8.873	22	21	79	45	16	25	55	41	69	32	166	121	60	59	89	99
422	NM_032526	chr1	40124792	40137710	-	NT5C1A	Bivalent	35.667	13.373	616.333	39.34	41	22	81	38	20	37	41	56	54	28	115	114	67	67	74	144
469	NM_016257	chr1	40144644	40157089	-	HPCAL4	Bivalent	31.667	9.501	582.667	33.616	29	32	63	50	18	35	58	65	49	38	113	92	78	71	58	150
5380	NR_036543	chr1	40204516	40222441	+	PPIE	H3K4me3-only	198.333	39.667	50.667	2.923	54	29	69	52	30	74	64	55	54	51	97	89	66	69	61	85
1092	NM_001720	chr1	40223902	40254533	-	BMP8B	Bivalent	70	26.247	340	26.844	6	11	58	36	6	3	47	37	48	28	145	169	51	51	139	164
3589	NM_022120	chr1	40235196	40237020	-	OXCT2	Bivalent	11.334	16.993	94.667	18.933	14	15	68	42	11	22	87	58	65	55	143	112	49	86	76	96
13305	NM_017646	chr1	40306705	40349177	-	TRIT1	H3K4me3-only	249	53.353	19	1	59	39	79	51	39	39	66	49	61	53	108	90	68	62	60	76
3558	NM_001033082	chr1	40361095	40367687	-	MYCL1	Bivalent	188	51.268	95.667	4.284	21	14	64	29	13	27	61	37	50	41	159	151	44	56	117	115
3914	NM_032793	chr1	40420783	40435628	+	MFSD2A	H3K4me3-only	105	10.862	82.333	2.94	29	21	94	31	16	28	53	49	80	37	181	108	50	59	79	84
16632	NM_006367	chr1	40506254	40538321	+	CAP1	H3K4me3-only	315.333	39.417	16.333	0.731	27	18	71	36	11	38	66	63	70	45	127	102	45	77	80	123
10604	NM_000310	chr1	40538381	40563142	-	PPT1	H3K4me3-only	158.666	19.041	22.666	1.388	43	51	62	38	29	67	81	77	55	55	80	86	66	81	54	74
18609	NM_012421	chr1	40627040	40706593	+	RLF	H3K4me3-only	256.667	24.062	14.999	0.703	38	37	67	32	26	56	73	72	65	53	113	90	46	81	67	83
20218	NM_001008740	chr1	40713572	40717365	+	TMCO2	Unmarked	2	0.429	13.666	1.079	85	73	75	52	62	95	74	62	54	48	48	54	84	78	6	49
15930	NM_005857	chr1	40723721	40759856	+	ZMPSTE24	H3K4me3-only	389	50.737	17	0.927	38	24	82	48	26	48	70	57	77	53	117	82	51	76	61	89
921	NM_001852	chr1	40766162	40782939	-	COL9A2	Bivalent	66.667	10	381	16.099	23	23	81	36	14	16	68	49	68	46	129	113	58	61	79	135
8259	NM_022733	chr1	40839377	40888998	+	SMAP2	H3K4me3-only	134.333	18.319	28.667	1.344	37	26	82	35	24	40	64	54	66	53	152	88	53	63	61	101
8168	NM_001198978	chr1	40840304	40888998	+	SMAP2	H3K4me3-only	113.333	16.999	29	1.5	55	53	86	24	41	72	124	37	82	88	93	74	41	60	34	35
18773	NM_001198979	chr1	40859016	40888998	+	SMAP2	Unmarked	1	0.3	14.666	1.048	96	44	98	48	45	71	73	41	65	55	72	72	79	60	21	59
25162	NM_001198980	chr1	40862471	40888998	+	SMAP2	Unmarked	2	0.667	8.333	0.581	86	69	67	55	65	148	76	62	60	66	47	23	65	69	6	35
12766	NM_023070	chr1	40916336	40929390	+	ZFP69B	H3K4me3-only	208	36.704	19.666	1	46	43	88	33	34	59	84	56	81	59	104	78	49	72	46	67
7484	NM_198494	chr1	40943301	40962015	+	ZFP69	H3K4me3-only	185	42.696	32	1.655	39	26	69	39	22	37	65	61	58	53	136	101	54	69	77	93
4464	NM_022774	chr1	40974432	40982214	+	EXO5	Bivalent	200.667	30.103	67.667	3.759	59	24	79	39	24	45	55	66	67	48	118	94	51	74	74	82
16974	NM_152373	chr1	40997232	41013841	+	ZNF684	H3K4me3-only	339	56.5	16	0.676	66	46	66	59	46	81	68	74	65	52	75	54	59	90	37	61
8635	NM_014747	chr1	41086351	41131324	-	RIMS3	H3K4me3-only	157.333	36.31	27.333	1.464	39	20	75	35	17	31	65	45	64	46	160	94	49	61	64	134
21609	NR_024567	chr1	41154751	41157933	-	LOC100130557	H3K4me3-only	303	41.32	12.333	0.536	43	29	69	61	20	31	41	72	48	29	77	102	90	75	69	143
22016	NM_001142588	chr1	41157241	41237275	+	NFYC	H3K4me3-only	297.667	42.524	12	0.529	69	36	55	48	37	53	59	75	44	51	85	89	57	84	70	87
21355	NM_001142590	chr1	41157679	41237275	+	NFYC	H3K4me3-only	285.667	35.708	12.666	0.559	35	22	60	30	14	41	70	65	56	48	148	113	41	79	88	89
21994	NR_029846	chr1	41220026	41220118	+	MIR30E	Unmarked	2.667	0.533	12	0.857	63	57	69	40	46	101	80	88	44	59	45	57	76	98	11	65
22615	NR_029833	chr1	41222955	41223044	+	MIR30C1	Unmarked	2.333	0.318	11.333	0.68	62	48	82	58	43	72	90	54	62	67	73	57	82	73	14	62
2220	NM_172163	chr1	41249683	41306124	+	KCNQ4	Bivalent	66	28.29	174.333	7.472	14	7	44	29	8	17	41	49	33	30	123	164	39	61	142	198
3734	NM_133467	chr1	41326727	41328018	-	CITED4	Bivalent	80.333	8.31	88	3.882	28	16	61	34	19	28	62	47	40	44	123	136	52	67	97	145
11849	NM_001905	chr1	41445006	41478235	+	CTPS1	H3K4me3-only	197.667	25.782	20.667	0.861	33	22	76	48	20	33	50	68	53	48	95	107	72	68	83	123
16261	NR_037868	chr1	41480261	41509562	+	SLFNL1-AS1	Unmarked	1.333	0.286	16.666	0.926	65	44	88	35	38	67	101	49	60	84	114	55	69	60	10	60
5905	NM_144990	chr1	41481268	41487427	-	SLFNL1	Unmarked	3.667	0.5	44.333	1.727	40	33	93	41	30	44	88	60	63	53	104	79	74	92	14	91
5984	NM_001168247	chr1	41481268	41487397	-	SLFNL1	Unmarked	3.667	0.55	43.666	1.658	38	32	94	38	31	44	90	58	63	53	103	83	69	95	15	93
5111	NM_001172218	chr1	41492870	41707815	-	SCMH1	Bivalent	176.667	88.334	55	3	13	5	54	26	8	11	35	59	37	39	147	145	40	58	133	189
23789	NM_001172221	chr1	41492870	41628689	-	SCMH1	Unmarked	0	0	10.333	0.756	41	28	103	35	18	53	83	76	58	53	88	90	90	95	15	73
24347	NM_001031694	chr1	41492870	41627104	-	SCMH1	Unmarked	0.333	0.25	9.666	0.569	95	89	55	47	91	152	65	56	41	61	46	28	60	62	9	42
25780	NM_001172222	chr1	41492870	41625605	-	SCMH1	Unmarked	1.333	0.5	7.666	0.523	103	96	64	50	90	137	65	62	58	48	31	25	61	74	2	33
7102	NM_001956	chr1	41944445	41950344	-	EDN2	Unmarked	2	0.24	34.333	1.338	22	20	89	41	14	17	78	60	53	35	138	109	83	97	29	114
1754	NM_001127714	chr1	41972035	42384378	-	HIVEP3	Bivalent	67.667	15.617	225.667	11.673	68	86	54	38	61	96	94	47	53	58	68	70	64	57	34	51
1805	NR_038260	chr1	42312859	42384496	-	HIVEP3	Bivalent	42.667	8.001	219.667	11.362	71	87	55	45	63	94	99	49	57	65	60	57	67	59	26	45
5440	NR_038261	chr1	42312859	42501596	-	HIVEP3	Bivalent	158.667	119.03	50	3.75	26	17	52	33	10	31	43	61	40	39	143	123	52	59	107	163
12005	NM_007102	chr1	42619091	42621495	+	GUCA2B	Unmarked	2.667	0.471	20.666	1.088	36	31	89	54	18	26	85	55	68	49	109	76	88	78	18	119
11448	NM_033553	chr1	42628361	42630395	-	GUCA2A	Unmarked	0.667	0.182	21.333	1.524	41	31	73	41	22	43	81	75	51	51	97	72	73	95	20	133
19414	NM_014947	chr1	42642209	42800903	-	FOXJ3	H3K4me3-only	248.333	67.721	14.333	0.956	19	13	57	30	9	25	56	55	52	41	180	131	40	66	111	114
20069	NM_001198851	chr1	42642209	42800636	-	FOXJ3	H3K4me3-only	275	48.527	13.666	0.911	11	12	54	31	10	33	64	55	50	40	164	135	37	77	107	119
20176	NM_001198850	chr1	42642209	42801548	-	FOXJ3	H3K4me3-only	180	31.763	13.666	0.82	90	49	79	46	47	51	64	64	67	54	85	61	60	72	39	71
20274	NM_001198852	chr1	42642209	42800886	-	FOXJ3	H3K4me3-only	253.333	76.008	13.666	0.953	17	13	58	31	9	25	55	55	53	41	180	131	40	65	112	114
4445	NM_173642	chr1	42846467	42889900	+	RIMKLA	Bivalent	157	52.333	68	4.08	9	14	49	38	10	20	42	63	44	32	111	147	47	69	132	172
12890	NM_001146192	chr1	42896000	42921938	-	ZMYND12	H3K4me3-only	305.667	53.938	19.666	0.967	31	20	47	60	26	61	76	57	42	56	79	105	59	82	80	118
15127	NM_001077447	chr1	42922172	42926086	+	PPCS	H3K4me3-only	352	58.667	17.333	0.881	54	18	72	50	23	36	62	49	55	50	114	113	62	66	85	90
24446	NM_001080850	chr1	43000559	43120335	+	CCDC30	Unmarked	2.333	0.467	9.333	0.475	121	91	86	49	89	112	56	48	71	46	44	29	66	56	4	31
10016	NM_006347	chr1	43124047	43142429	+	PPIH	H3K4me3-only	281	32.422	23.667	0.934	57	29	84	55	30	42	66	57	75	48	97	80	64	75	53	87
13951	NM_004559	chr1	43148065	43168020	+	YBX1	H3K4me3-only	229.333	40.468	18.333	0.833	32	28	70	47	30	34	34	55	57	40	119	109	58	51	101	134
9082	NM_148960	chr1	43198763	43205925	-	CLDN19	Unmarked	29.667	2.967	26	0.907	35	26	64	39	21	43	72	76	35	32	108	95	73	110	27	143
16668	NM_001243246	chr1	43212005	43232755	-	LEPRE1	H3K4me3-only	330.333	39.642	16.333	0.645	17	12	50	34	10	24	72	56	52	41	137	137	34	84	108	131
16016	NM_024097	chr1	43232915	43241413	+	C1orf50	H3K4me3-only	340.667	34.067	16.667	0.649	23	17	79	45	15	29	40	59	55	39	115	123	71	59	98	132
11897	NM_001242750	chr1	43253660	43263901	+	LOC100129924	Unmarked	2	0.5	20.667	1.348	86	48	94	40	29	58	92	48	82	53	91	64	71	69	13	61
21242	NM_199342	chr1	43272722	43283059	-	CCDC23	H3K4me3-only	97.667	22.54	12.667	0.679	59	42	52	33	35	52	53	62	41	42	125	97	50	66	75	115
23175	NM_001017922	chr1	43282775	43310660	+	ERMAP	H3K4me3-only	186	27.899	10.999	0.623	52	19	64	37	20	43	58	48	51	42	125	105	50	64	76	145
27217	NM_018538	chr1	43291248	43310660	+	ERMAP	Unmarked	3.333	0.769	5	0.319	85	69	81	38	57	98	79	59	66	55	77	49	64	71	11	40
14485	NM_015911	chr1	43312243	43318146	+	ZNF691	H3K4me3-only	330	34.137	18	0.651	49	30	61	53	37	65	59	73	55	46	84	72	52	92	53	118
10515	NM_006516	chr1	43391045	43424847	-	SLC2A1	H3K4me3-only	271	33.875	22.667	0.81	45	26	92	61	36	36	42	57	64	52	85	86	79	57	68	113
11067	NR_033967	chr1	43424719	43449029	+	SLC2A1-AS1	H3K4me3-only	296	49.333	22	0.815	28	19	54	43	29	43	79	62	48	57	128	107	39	94	79	90
15252	NM_001101376	chr1	43613593	43622067	+	FAM183A	H3K4me3-only	63.333	15.833	17.333	1.3	66	42	78	43	35	92	64	44	71	52	114	68	57	49	49	75
9131	NM_001159936	chr1	43629844	43638241	-	EBNA1BP2	H3K4me3-only	181.333	45.333	25.667	1.283	47	55	51	45	39	73	61	78	52	47	65	67	59	76	54	130
10236	NM_006824	chr1	43629844	43637986	-	EBNA1BP2	H3K4me3-only	294.333	63.067	23.333	1.148	31	22	65	45	21	53	67	70	61	57	94	82	51	78	68	134
10169	NM_152498	chr1	43638000	43676549	+	WDR65	H3K4me3-only	290.333	67.005	23.333	1.148	51	24	77	57	23	33	51	62	70	45	134	81	65	67	69	90
12320	NM_144626	chr1	43735664	43739673	+	TMEM125	H3K4me3-only	25	3.75	20	0.706	55	43	97	26	37	71	97	40	75	62	153	69	54	69	12	39
11797	NM_001164829	chr1	43747556	43751288	-	C1orf210	H3K4me3-only	65.333	7.538	20.667	0.886	45	33	84	50	28	52	86	53	63	63	109	67	76	71	22	97
12185	NM_182517	chr1	43747556	43751250	-	C1orf210	H3K4me3-only	67.334	7.769	20.333	0.871	44	30	81	51	29	53	84	57	58	64	107	66	76	76	23	100
10504	NM_005424	chr1	43766565	43788781	+	TIE1	Unmarked	2	0.231	22.667	0.907	44	39	73	51	33	65	77	65	54	56	84	53	76	80	14	135
12083	NM_005373	chr1	43803474	43820135	+	MPL	Unmarked	1.667	0.294	20.333	0.984	45	49	77	45	43	43	83	65	57	50	96	65	70	93	12	106
16923	NM_001255	chr1	43824625	43828873	+	CDC20	H3K4me3-only	290	37.824	16	0.686	39	20	73	39	18	38	55	61	59	40	106	108	56	73	79	135
13014	NR_046117	chr1	43829067	43833745	-	ELOVL1	H3K4me3-only	148.667	24.778	19.333	0.983	19	11	61	36	12	25	58	63	38	31	110	120	58	91	71	195
13127	NM_001256399	chr1	43829067	43833409	-	ELOVL1	H3K4me3-only	151.667	23.949	19.333	0.866	17	14	58	30	9	27	76	50	45	41	130	117	48	79	69	189
17521	NM_201542	chr1	43849578	43855483	-	MED8	H3K4me3-only	318.667	43.457	15.666	0.58	59	27	86	47	30	38	68	38	79	50	124	90	50	60	65	88
18231	NM_015284	chr1	43855555	43919918	+	SZT2	H3K4me3-only	312.333	44.619	15	0.556	40	27	61	53	32	64	52	72	39	49	91	89	70	81	63	116
7087	NM_001190880	chr1	43916673	43919660	-	HYI	H3K4me3-only	133.333	25.002	34.333	1.132	63	39	55	38	33	56	51	62	48	34	91	114	52	72	90	101
6269	NM_002840	chr1	43996546	44089343	+	PTPRF	H3K4me3-only	123.333	24.667	40.666	1.936	20	28	73	23	32	39	51	57	50	47	157	119	42	66	92	103
14085	NM_014663	chr1	44115796	44171189	+	KDM4A	H3K4me3-only	217	32.548	18.333	0.965	35	35	77	42	30	69	67	54	71	46	128	87	53	69	61	75
15294	NR_033827	chr1	44165408	44173012	-	KDM4A-AS1	H3K4me3-only	268	50.253	17.333	0.675	29	18	68	45	19	36	41	49	55	38	135	130	58	53	114	111
14739	NR_073016	chr1	44173203	44396837	+	ST3GAL3	H3K4me3-only	298	63.853	17.667	0.697	20	16	49	37	12	17	59	60	47	43	122	138	43	72	120	144
4999	NM_001136215	chr1	44398991	44402912	+	ARTN	H3K4me3-only	91.333	13.048	57	1.71	40	29	74	56	23	31	57	75	50	33	81	86	86	93	38	147
11090	NM_014652	chr1	44412477	44433694	+	IPO13	H3K4me3-only	195.667	18.936	22	1.015	16	9	69	46	16	31	54	66	51	43	113	114	56	85	85	145
14083	NM_001384	chr1	44435652	44439043	+	DPH2	H3K4me3-only	238.667	44.753	18.333	0.714	64	36	78	49	29	32	80	51	84	55	107	73	51	69	54	87
9410	NM_001039457	chr1	44440601	44443972	+	ATP6V0B	H3K4me3-only	303.667	56.941	25	1.172	25	14	72	55	20	25	53	47	69	38	136	125	51	69	107	93
8291	NM_003780	chr1	44444873	44456843	+	B4GALT2	H3K4me3-only	172.667	47.087	28.666	1.323	19	13	53	29	8	24	42	57	45	32	133	132	41	62	114	195
8389	NM_030587	chr1	44445607	44456843	+	B4GALT2	H3K4me3-only	151	28.314	28	1.333	17	15	68	36	7	31	92	56	54	69	87	99	58	71	62	177
8189	NM_001005417	chr1	44446176	44456843	+	B4GALT2	H3K4me3-only	49.333	6.728	29	1.5	40	35	76	31	29	46	139	57	57	115	92	55	56	74	13	84
6582	NM_152499	chr1	44457279	44462198	+	CCDC24	H3K4me3-only	144.333	22.791	38	1.727	42	13	67	44	17	40	76	44	64	64	158	88	43	61	72	106
9607	NR_048549	chr1	44462154	44497164	-	SLC6A9	H3K4me3-only	254	29.307	24.666	1.057	43	22	81	35	19	29	74	56	63	54	153	97	56	73	60	84
16396	NM_201649	chr1	44462154	44483012	-	SLC6A9	Unmarked	4.333	0.812	16.333	0.803	29	20	88	44	13	29	105	50	60	77	119	85	80	70	29	101
15105	NM_173484	chr1	44584521	44600809	+	KLF17	Unmarked	1.666	0.454	17.333	1.083	44	25	99	30	24	37	82	43	81	64	168	77	50	60	41	74
15489	NM_019100	chr1	44679124	44686351	+	DMAP1	H3K4me3-only	225	37.5	17.333	0.788	72	42	75	55	38	62	54	60	59	45	105	70	75	65	45	77
15775	NM_024066	chr1	44686741	44820939	-	ERI3	H3K4me3-only	178.333	22.292	17	0.68	43	39	56	33	23	41	85	52	59	59	128	97	46	61	74	103
4117	NM_018150	chr1	44870959	45117396	+	RNF220	Bivalent	281.333	35.167	75.667	3.068	48	29	70	42	17	64	84	72	64	64	86	84	60	80	58	77
5105	NR_049849	chr1	45011164	45011224	+	MIR5584	Unmarked	2	0.261	55.333	1.908	68	51	93	47	38	85	64	61	78	38	85	58	74	75	17	67
9691	NM_024587	chr1	45119500	45140099	-	TMEM53	H3K4me3-only	217	27.125	24.333	0.973	21	35	80	32	31	47	69	61	66	53	121	92	50	73	62	106
10656	NM_001145636	chr1	45140393	45191263	+	C1orf228	H3K4me3-only	196.667	32.778	22.666	0.944	34	52	64	50	39	37	68	61	60	40	97	85	67	77	52	116
14902	NM_006845	chr1	45205489	45233438	+	KIF2C	H3K4me3-only	295.333	42.19	17.666	0.883	52	31	63	53	27	70	65	79	64	58	87	67	55	83	61	84
10277	NM_001012	chr1	45241245	45244412	+	RPS8	H3K4me3-only	388.667	97.167	23.333	1.029	53	29	66	54	22	39	48	72	53	44	86	96	74	68	80	115
10042	NR_000015	chr1	45241536	45241610	+	SNORD55	H3K4me3-only	449.333	96.279	23.667	1.044	42	17	80	37	20	40	61	62	59	58	114	103	55	68	79	104
9759	NR_000024	chr1	45242163	45242261	+	SNORD46	H3K4me3-only	386.667	50.433	24.333	1.141	58	23	82	39	30	69	78	65	53	73	97	72	60	77	39	84
10937	NR_001456	chr1	45243513	45243584	+	SNORD38A	H3K4me3-only	24.333	7.301	22	0.985	78	42	88	40	34	62	90	55	80	63	81	64	56	74	28	64
11816	NR_001457	chr1	45244061	45244130	+	SNORD38B	H3K4me3-only	14.333	3.071	20.667	0.984	79	43	87	32	37	80	93	59	67	64	76	64	58	81	15	64
6394	NM_153274	chr1	45249256	45253426	-	BEST4	Unmarked	3.667	0.55	39.333	1.595	36	27	81	49	38	53	85	66	50	62	102	71	69	100	17	93
7824	NM_004073	chr1	45266035	45271667	+	PLK3	H3K4me3-only	190	35.627	30.666	1.211	29	18	59	44	11	19	63	40	64	33	158	129	46	63	104	119
15228	NM_001013632	chr1	45271585	45272957	-	TCTEX1D4	Unmarked	11	0.943	17.333	0.542	47	28	103	44	23	35	70	73	69	43	101	74	83	95	13	98
11622	NM_001136537	chr1	45274153	45279801	+	BTBD19	Unmarked	10.667	1.143	21	0.563	33	17	71	42	21	50	73	79	46	42	102	81	62	114	26	140
5168	NM_003738	chr1	45287937	45308616	-	PTCH2	Bivalent	98.667	21.141	54.333	3.396	36	27	68	41	22	23	66	57	52	55	100	107	62	64	79	140
9622	NM_020365	chr1	45316193	45452394	-	EIF2B3	H3K4me3-only	193	32.167	24.666	1.121	71	31	75	45	23	39	70	68	71	55	94	81	58	75	62	81
7515	NM_024602	chr1	45468219	45477027	-	HECTD3	H3K4me3-only	193	41.354	32	1.247	62	34	87	40	30	29	71	44	62	54	118	103	69	57	62	77
8758	NR_036510	chr1	45477804	45481341	+	UROD	H3K4me3-only	96.333	9.965	27	1.025	46	55	68	48	42	77	77	76	66	50	79	50	63	89	22	91
2701	NM_020883	chr1	45482075	45672250	-	ZSWIM5	Bivalent	204.333	51.083	138.333	8.646	11	20	51	29	13	49	57	80	39	56	111	130	49	74	116	114
16065	NR_024270	chr1	45769581	45771291	+	LOC400752	H3K4me3-only	175.667	21.958	16.667	0.704	52	17	92	35	17	34	42	52	79	37	153	98	49	57	80	105
11252	NM_032756	chr1	45792544	45794346	+	HPDL	H3K4me3-only	150	30	21.666	1	53	17	83	42	13	32	81	51	74	66	109	96	55	63	71	93
13762	NM_001048172	chr1	45794913	45805787	-	MUTYH	H3K4me3-only	361	37.344	18.666	0.636	44	29	75	37	30	37	64	73	66	57	110	94	45	81	78	79
13976	NM_001048174	chr1	45794913	45805629	-	MUTYH	H3K4me3-only	343.333	34.333	18.333	0.604	47	28	85	26	30	37	69	63	74	63	130	96	35	71	79	66
14484	NM_001048171	chr1	45794913	45806142	-	MUTYH	H3K4me3-only	288	29.792	18	0.607	40	33	69	52	34	51	62	71	58	48	81	88	61	87	63	101
14640	NM_025077	chr1	45805341	45809650	+	TOE1	H3K4me3-only	244	27.111	18	0.562	41	35	61	57	36	83	39	72	51	31	64	87	66	82	69	125
9418	NM_007170	chr1	45809554	45956840	-	TESK2	H3K4me3-only	170.333	24.333	25	1.013	20	24	50	45	32	75	58	78	36	42	83	98	51	102	68	137
14516	NR_033296	chr1	45959597	45965751	-	CCDC163P	H3K4me3-only	224.333	28.042	18	0.74	47	39	73	58	35	66	59	72	53	58	75	67	81	69	47	100
14328	NM_015506	chr1	45965855	45976739	+	MMACHC	H3K4me3-only	229	31.229	18	0.73	65	39	72	61	32	47	79	49	78	56	100	67	61	65	51	77
17564	NM_001202431	chr1	45976706	45988562	-	PRDX1	H3K4me3-only	25.667	4.529	15.666	0.746	82	56	83	46	68	80	73	49	65	73	84	47	53	61	28	51
18793	NM_181696	chr1	45976706	45987610	-	PRDX1	H3K4me3-only	293.667	41.952	14.666	0.687	41	26	69	38	33	54	70	64	59	66	113	87	41	76	72	90
18270	NM_006066	chr1	46016454	46035723	+	AKR1A1	H3K4me3-only	237.667	30.999	15	0.703	58	36	70	45	28	59	75	56	65	47	89	86	58	77	52	98
17859	NM_002482	chr1	46049659	46084578	+	NASP	H3K4me3-only	509.333	47.748	15.333	0.517	40	29	82	27	31	53	65	73	61	62	114	91	46	78	67	80
20579	NM_001114938	chr1	46085715	46089731	-	CCDC17	Unmarked	1.333	0.235	13.333	0.755	52	48	75	52	37	73	73	69	59	41	72	63	78	90	16	101
19884	NM_021639	chr1	46092975	46152302	-	GPBP1L1	H3K4me3-only	415.333	69.222	14	0.764	51	18	73	45	26	36	59	52	60	62	149	95	50	57	85	81
25434	NR_026768	chr1	46111451	46112357	-	RPS15AP10	Unmarked	1	0.429	8	0.558	191	73	84	49	67	60	59	38	80	41	56	39	58	50	18	36
14709	NM_016486	chr1	46153846	46160108	+	TMEM69	H3K4me3-only	255.667	69.721	17.667	0.855	80	48	72	46	44	96	66	63	55	55	85	50	68	70	22	79
11824	NM_001145349	chr1	46159997	46216485	-	IPP	H3K4me3-only	114	12.215	20.667	1.016	69	33	76	39	30	52	58	72	65	54	77	77	52	73	62	110
8712	NM_015112	chr1	46269284	46501796	+	MAST2	H3K4me3-only	79	39.5	27	1.5	26	31	71	21	16	43	74	47	70	49	131	134	38	57	107	84
8455	NM_001114172	chr1	46505811	46598708	-	PIK3R3	H3K4me3-only	143.667	17.241	28	1.313	31	16	74	35	13	56	58	76	60	47	99	101	52	84	75	122
8489	NM_003629	chr1	46505811	46598380	-	PIK3R3	H3K4me3-only	162.333	24.349	27.667	1.221	35	21	63	38	11	74	62	73	67	40	107	93	44	84	76	111
8511	NM_005727	chr1	46640748	46651634	+	TSPAN1	Unmarked	4.333	0.684	27.667	1.317	51	46	73	82	40	51	60	82	50	43	40	54	111	92	14	110
16889	NM_017739	chr1	46654352	46664121	-	POMGNT1	H3K4me3-only	208.333	48.081	16	0.873	35	27	75	36	27	38	74	41	58	47	134	112	53	68	68	106
21699	NM_001243766	chr1	46654352	46685977	-	POMGNT1	Unmarked	1	0.3	12.333	0.74	77	50	90	40	43	31	75	67	64	44	95	69	74	91	11	78
8222	NM_001013615	chr1	46669005	46686928	+	LURAP1	H3K4me3-only	247.333	24.733	28.667	1.089	38	28	70	40	25	43	91	61	61	71	106	82	51	79	53	100
13296	NM_003579	chr1	46713366	46744145	+	RAD54L	H3K4me3-only	228.667	45.733	19	0.851	27	24	38	48	22	51	45	108	33	37	57	82	55	114	69	189
13213	NM_006369	chr1	46744071	46769038	-	LRRC41	H3K4me3-only	262	28.072	19.333	0.967	46	38	79	39	35	43	52	57	65	42	132	98	56	64	74	79
16339	NM_006004	chr1	46769379	46782447	+	UQCRH	H3K4me3-only	328.667	46.952	16.666	0.794	57	47	73	45	44	66	66	65	70	51	68	74	51	78	56	88
15954	NR_045789	chr1	46805848	46830824	+	NSUN4	H3K4me3-only	102.667	20.533	16.999	0.689	52	47	79	38	36	98	54	75	55	45	89	68	73	73	36	81
15198	NM_001256128	chr1	46806849	46830824	+	NSUN4	H3K4me3-only	258.667	26.758	17.333	0.703	34	27	45	54	20	71	53	105	48	48	57	64	57	103	63	150
4740	NM_001441	chr1	46859938	46879520	+	FAAH	H3K4me3-only	172.333	23.501	61.667	2.891	49	33	76	29	25	38	71	45	64	48	150	117	48	60	82	64
6807	NR_045483	chr1	46899498	46911374	+	LOC729041	Unmarked	3	0.529	36.333	1.677	35	64	69	40	46	70	70	102	42	52	90	51	84	103	6	75
7535	NM_147192	chr1	46972667	46979886	+	DMBX1	Unmarked	2.666	0.5	32	2.462	63	54	90	51	40	41	82	47	74	42	93	75	81	73	18	75
4989	NR_038403	chr1	47004367	47035927	+	MKNK1-AS1	H3K27me3-only	3.333	0.909	57.333	3.909	45	41	74	40	30	72	107	65	60	63	97	62	65	97	5	76
6181	NM_001097611	chr1	47011315	47016887	-	KNCN	Unmarked	2.333	0.437	41.333	1.797	48	34	101	34	24	34	72	58	70	39	148	87	76	81	23	70
9324	NM_003684	chr1	47023078	47069966	-	MKNK1	H3K4me3-only	117.333	22.001	25.333	1.07	58	40	71	36	38	74	59	68	58	48	89	80	51	77	56	96
4455	NM_201403	chr1	47073386	47082563	-	MOB3C	H3K4me3-only	123.333	19.475	68	2.873	28	26	84	30	14	58	73	59	78	56	147	83	48	63	61	91
7724	NM_145279	chr1	47073386	47080805	-	MOB3C	Unmarked	4	0.667	31	1.148	68	39	98	30	29	70	84	58	72	59	107	57	66	73	7	82
7661	NM_022745	chr1	47100710	47134099	-	ATPAF1	H3K4me3-only	164.333	41.083	31.333	1.424	25	24	81	38	25	26	68	37	68	39	139	136	50	66	94	83
15874	NM_001243728	chr1	47100710	47131550	-	ATPAF1	Unmarked	7	1.909	17	0.864	96	56	87	51	52	76	74	52	72	50	68	41	69	73	2	80
10875	NM_001145474	chr1	47137496	47139256	+	TEX38	Unmarked	3	0.75	22	1.138	67	46	79	56	38	72	85	55	71	49	92	50	73	83	5	78
21985	NR_038828	chr1	47139707	47157769	+	EFCAB14-AS1	Unmarked	4	0.857	12	0.632	84	80	58	52	60	72	98	58	53	65	58	46	76	71	9	59
12508	NM_014774	chr1	47140830	47184736	-	EFCAB14	H3K4me3-only	230	46	20	1.2	36	20	68	45	20	40	52	58	55	40	117	115	58	70	89	116
14762	NM_001099772	chr1	47264669	47285021	+	CYP4B1	Unmarked	1.667	0.313	17.667	1.104	65	48	81	34	31	77	89	65	63	42	100	72	69	94	8	61
25903	NR_002788	chr1	47308766	47366147	-	CYP4Z2P	Unmarked	1.667	0.556	7.333	0.564	92	80	75	40	57	77	75	72	65	41	62	46	73	82	3	59
20548	NM_000778	chr1	47394845	47407156	-	CYP4A11	Unmarked	1.333	0.666	13.333	1.481	73	60	78	44	39	57	81	79	56	54	72	57	87	84	8	70
4911	NM_178033	chr1	47489239	47516423	+	CYP4X1	H3K4me3-only	78	12.316	58.667	2.839	62	52	74	42	48	61	65	44	65	37	90	89	56	68	52	94
16711	NM_178134	chr1	47533159	47583992	+	CYP4Z1	Unmarked	1.666	0.625	16.333	1.581	92	68	77	42	46	81	85	68	79	40	71	43	63	90	0	54
20520	NM_001010969	chr1	47603106	47614526	+	CYP4A22	Unmarked	2.667	0.471	13.333	0.741	73	61	80	44	41	50	78	79	55	56	68	57	89	80	10	78
3998	NR_047498	chr1	47644921	47646011	+	LINC00853	Bivalent	69	7.961	79	3.038	33	38	89	52	19	38	68	82	72	42	85	74	88	89	31	99
5675	NM_005764	chr1	47649260	47655771	-	PDZK1IP1	Unmarked	1.667	0.417	47	2.611	35	21	105	39	18	43	63	69	62	41	113	88	86	88	22	106
177	NM_003189	chr1	47681962	47695443	-	TAL1	H3K27me3-only	20	2.5	841	36.565	61	35	62	43	31	99	61	85	62	52	106	41	47	90	32	92
18081	NM_003035	chr1	47715810	47779819	-	STIL	H3K4me3-only	253.333	28.148	15.333	0.754	77	36	67	42	38	76	70	63	60	61	78	76	46	74	61	74
20880	NR_046395	chr1	47799468	47824547	+	CMPK1	H3K4me3-only	262	87.333	13	0.639	27	27	48	42	22	56	60	67	41	41	81	126	54	81	101	125
579	NM_012186	chr1	47881743	47883724	+	FOXE3	Bivalent	14.333	3.071	514	28.037	51	38	82	26	17	24	66	41	78	33	183	103	50	53	66	88
15	NR_026878	chr1	47897806	47900313	-	FOXD2-AS1	H3K27me3-only	13.333	1.818	1160.67	44.641	42	27	76	41	32	80	68	78	56	53	87	80	56	97	45	81
153	NM_004474	chr1	47901688	47906363	+	FOXD2	H3K27me3-only	5	0.79	879.667	31.417	97	49	88	43	47	80	79	60	71	62	77	42	62	74	8	60
3282	NM_001194986	chr1	48226199	48462562	-	TRABD2B	Bivalent	153.667	57.618	106.667	5.333	10	7	52	38	5	24	44	67	41	25	102	133	51	84	103	213
21586	NR_026749	chr1	48567386	48648100	-	SKINTL	Unmarked	2.667	0.533	12.333	0.74	55	66	83	45	51	99	83	69	60	57	47	54	83	80	5	62
9211	NM_001135181	chr1	48688356	48714316	+	SLC5A9	Unmarked	1	0.214	25.666	1.167	45	33	89	46	29	57	87	71	64	63	111	59	75	91	10	69
14696	NM_019073	chr1	48761043	48937876	-	SPATA6	H3K4me3-only	141	28.2	17.667	0.815	38	23	51	51	22	48	49	81	41	39	69	95	61	90	76	165
5387	NM_032785	chr1	48998526	50489626	-	AGBL4	Bivalent	58.667	13.54	50.667	3.455	49	21	79	41	18	37	71	56	58	64	138	87	65	60	59	96
7840	NM_024603	chr1	49193539	49242547	-	BEND5	H3K4me3-only	179.667	77.011	30.333	1.625	38	35	43	40	18	71	62	57	47	35	98	103	53	67	80	152
3634	NM_001144777	chr1	50513685	50667540	+	ELAVL4	Bivalent	34.333	7.357	92.666	6.044	51	31	76	58	29	54	47	58	65	35	89	85	70	68	62	121
23123	NM_001144776	chr1	50569581	50667540	+	ELAVL4	Unmarked	1	0.188	11	0.647	106	77	76	48	67	108	75	50	67	57	54	36	67	59	8	44
23139	NM_001144775	chr1	50571963	50667540	+	ELAVL4	Unmarked	2.333	0.583	11	0.702	81	74	57	33	47	131	104	55	68	55	57	56	48	77	18	38
15233	NM_021952	chr1	50574593	50667540	+	ELAVL4	Unmarked	4.667	1	17.333	1.02	88	69	77	36	65	116	70	63	50	65	52	48	66	64	16	54
98	NM_032110	chr1	50883222	50889119	-	DMRTA2	Bivalent	43.333	9.285	940.333	44.079	37	20	91	45	15	40	47	52	76	40	121	105	65	54	83	108
17361	NM_007051	chr1	50906934	51425936	-	FAF1	H3K4me3-only	202.667	38.002	15.667	0.839	34	28	64	38	23	48	80	45	63	61	102	121	43	60	101	88
965	NM_001262	chr1	51434366	51440306	+	CDKN2C	Bivalent	82.667	17.713	367.667	18.383	77	10	92	42	13	29	48	38	74	24	134	129	56	65	87	81
763	NM_078626	chr1	51435641	51440309	+	CDKN2C	Bivalent	44.333	7.389	429	23.4	54	38	67	52	34	53	58	73	62	45	84	81	62	82	63	91
24303	NM_001136508	chr1	51567905	51613754	+	C1orf185	Unmarked	2.333	0.875	9.666	0.967	91	120	54	28	107	164	71	60	54	57	38	20	40	62	6	27
7058	NM_014372	chr1	51701944	51739119	+	RNF11	H3K4me3-only	212.667	49.081	34.667	2.123	40	38	77	41	21	28	66	38	86	35	123	107	49	52	85	113
3399	NM_001144832	chr1	51752929	51810785	-	TTC39A	Bivalent	58.667	9.778	101.999	4.135	23	10	72	36	11	29	70	58	54	52	147	108	54	77	72	126
24082	NM_001080494	chr1	51752929	51787938	-	TTC39A	Unmarked	2.667	0.727	10	0.698	61	51	92	40	38	69	68	60	73	39	104	56	72	77	8	91
17930	NM_001981	chr1	51819934	51984995	-	EPS15	H3K4me3-only	144	36	15.333	0.793	29	31	58	29	34	62	49	62	32	48	109	116	51	66	89	134
22591	NM_001159969	chr1	51819934	51887793	-	EPS15	H3K4me3-only	53.333	13.333	11.333	0.531	92	104	65	35	88	172	74	47	62	50	35	30	53	55	4	33
14618	NM_148906	chr1	52082545	52254891	+	OSBPL9	H3K4me3-only	160.333	20.042	18	0.857	54	72	49	40	55	100	75	65	48	51	71	67	58	72	41	81
12074	NM_148904	chr1	52195485	52254891	+	OSBPL9	H3K4me3-only	274.667	63.39	20.333	1.017	35	15	70	37	11	37	54	61	58	42	143	95	52	69	72	148
12215	NM_002525	chr1	52254865	52344609	-	NRD1	H3K4me3-only	252.333	34.411	20.333	0.824	55	32	65	47	29	74	64	70	67	57	108	74	48	75	69	65
15276	NM_001242361	chr1	52254865	52343712	-	NRD1	H3K4me3-only	394	56.286	17.333	0.703	64	53	82	41	45	79	79	61	78	65	100	49	54	67	30	52
25885	NR_031580	chr1	52302015	52302074	-	MIR761	Unmarked	1.333	0.333	7.333	0.55	100	89	64	41	77	139	74	63	65	50	39	30	52	74	8	34
7566	NM_002867	chr1	52373627	52456436	-	RAB3B	H3K4me3-only	141.333	26.502	31.667	1.484	45	32	96	44	23	27	52	43	90	40	155	89	60	45	71	87
11436	NR_046406	chr1	52497768	52521843	-	TXNDC12	H3K4me3-only	334.333	58.996	21.333	0.771	60	28	78	48	34	56	60	48	57	54	112	92	63	59	65	85
22288	NM_138417	chr1	52497776	52499472	-	KTI12	H3K4me3-only	234	31.911	11.667	0.522	54	48	69	44	46	64	77	47	72	53	84	94	44	68	73	62
11340	NM_152265	chr1	52521856	52556388	+	BTF3L4	H3K4me3-only	334.333	58.996	21.333	0.771	56	29	59	55	35	62	62	58	48	46	84	90	60	80	63	112
8659	NM_007324	chr1	52607765	52812358	+	ZFYVE9	H3K4me3-only	221.333	34.949	27.333	1.155	29	14	59	28	15	36	53	58	50	52	148	125	35	60	116	121
12923	NM_032449	chr1	52816264	52831877	-	CC2D1B	H3K4me3-only	245	35	19.333	0.763	22	18	64	31	18	36	66	53	54	54	119	122	41	65	100	136
19718	NM_001190818	chr1	52838500	52870143	-	ORC1	H3K4me3-only	440.333	44.033	14	0.488	50	35	80	40	35	69	62	68	66	56	94	82	54	74	63	71
19090	NM_032864	chr1	52870218	52883992	+	PRPF38A	H3K4me3-only	442.333	44.233	14.333	0.506	72	38	74	57	37	51	58	65	72	48	68	75	60	75	63	86
11142	NM_015269	chr1	52888947	53018762	-	ZCCHC11	H3K4me3-only	249	41.5	21.667	1.161	15	10	52	31	11	31	49	84	48	44	126	104	34	91	94	175
1799	NM_015696	chr1	53068042	53074723	+	GPX7	Bivalent	79.667	17.07	220.666	9.069	34	19	53	50	14	35	56	61	52	38	109	120	56	75	101	126
554	NM_001042693	chr1	53099065	53122737	+	FAM159A	Bivalent	47.333	10.142	526.667	25.902	12	14	53	38	13	28	57	81	32	49	87	130	59	88	101	157
8603	NM_023077	chr1	53152013	53164038	-	SELRC1	H3K4me3-only	179.333	19.215	27.333	1.414	51	42	82	46	35	36	71	49	78	53	115	86	57	59	65	74
17245	NM_024646	chr1	53192130	53293013	+	ZYG11B	H3K4me3-only	150.333	28.189	15.667	1.068	48	43	82	23	32	50	68	57	80	39	100	93	35	76	62	111
2412	NM_001004339	chr1	53308182	53360247	+	ZYG11A	Bivalent	45.333	6.8	159	7.571	52	52	61	28	52	77	77	56	51	71	119	80	38	62	64	59
3455	NM_001198962	chr1	53361581	53387446	-	ECHDC2	Bivalent	110.333	13.792	99.334	4.383	74	28	75	48	21	41	56	57	62	46	118	89	67	60	67	90
1755	NM_001193600	chr1	53392900	53517289	+	SCP2	Bivalent	106.667	20.001	225.333	12.291	40	30	53	44	21	60	66	91	44	56	80	81	62	92	63	116
24756	NM_001007100	chr1	53480609	53517289	+	SCP2	H3K4me3-only	116	38.667	9	0.9	110	60	78	39	63	125	77	52	60	64	59	43	53	68	12	36
890	NM_153703	chr1	53527723	53551174	+	PODN	Bivalent	76.333	22.902	390.333	16.971	31	13	83	34	10	22	57	54	66	44	179	103	54	64	73	112
871	NM_001199081	chr1	53527884	53551174	+	PODN	Bivalent	80.667	26.889	396.667	17.761	32	12	82	33	9	14	59	52	71	45	186	104	47	64	79	110
10818	NM_006671	chr1	53552854	53608289	-	SLC1A7	Unmarked	3	0.818	22.333	1.396	50	51	57	46	38	57	95	67	48	55	93	70	68	94	22	88
6025	NM_000098	chr1	53662100	53679869	+	CPT2	H3K4me3-only	59.334	11.126	43	1.792	53	45	80	36	40	87	64	68	64	53	108	70	57	74	43	57
9866	NM_017887	chr1	53679771	53686289	-	C1orf123	H3K4me3-only	235.667	26.185	24	0.973	57	25	87	43	22	48	62	47	70	46	123	97	62	60	64	86
18085	NM_002370	chr1	53692563	53704282	-	MAGOH	H3K4me3-only	294	44.098	15.333	0.793	51	19	83	55	23	53	62	58	75	64	126	75	59	60	68	68
17735	NR_038953	chr1	53704281	53708455	+	LOC100507564	H3K4me3-only	293.667	44.048	15.333	0.793	53	19	60	63	23	51	60	75	58	55	68	75	62	83	68	126
9042	NM_001018054	chr1	53708040	53793821	-	LRP8	H3K4me3-only	166.333	38.387	26	1.068	22	23	71	35	9	11	54	53	53	18	133	154	66	75	100	122
9169	NR_002314	chr1	53904042	53905693	-	SLC25A3P1	Unmarked	2.667	0.533	25.667	1.116	80	38	73	60	49	64	65	49	64	49	98	63	58	76	39	74
9935	NM_033067	chr1	53925071	53933158	+	DMRTB1	Unmarked	2.333	0.583	24	1.5	64	41	75	48	25	45	63	49	69	37	76	98	69	59	66	115
4472	NM_147193	chr1	53971905	54199877	-	GLIS1	H3K27me3-only	1.333	0.308	67.333	3.258	93	67	66	42	46	91	92	59	57	62	63	54	72	67	16	52
13743	NM_018087	chr1	54231133	54304225	-	NDC1	H3K4me3-only	233.333	33.333	18.666	0.903	47	46	70	48	39	74	65	56	59	44	100	88	66	70	57	70
11844	NM_018982	chr1	54317391	54355487	-	YIPF1	H3K4me3-only	201.667	30.249	20.667	1.127	53	38	63	62	39	64	52	69	63	34	81	80	60	88	62	91
13991	NM_213593	chr1	54359860	54376759	+	DIO1	Unmarked	2.333	0.5	18.333	1.038	81	46	75	52	35	79	85	62	71	50	76	55	66	86	17	63
13027	NM_016126	chr1	54387233	54411288	-	HSPB11	H3K4me3-only	193.333	58.006	19.333	1.318	52	21	87	30	31	33	54	29	73	51	197	112	34	43	95	57
12656	NM_001256409	chr1	54411998	54433841	+	LRRC42	H3K4me3-only	188.333	70.643	19.667	1.283	8	11	53	35	16	27	42	54	36	37	150	124	47	65	101	193
16653	NM_001276395	chr1	54472970	54483859	-	LDLRAD1	Unmarked	1.333	0.333	16.333	0.803	63	41	94	38	28	49	81	63	77	55	95	59	68	76	16	96
15025	NM_004872	chr1	54497348	54519111	-	TMEM59	H3K4me3-only	343.333	44.781	17.666	0.671	55	16	82	57	20	32	58	54	73	41	103	92	61	75	66	114
14343	NM_153035	chr1	54519273	54565416	+	TCEANC2	H3K4me3-only	286	35.75	18	0.761	28	21	71	40	24	67	69	73	52	58	112	88	55	88	58	95
16166	NR_039942	chr1	54519751	54519827	+	MIR4781	H3K4me3-only	166.667	21.738	16.666	0.704	61	48	80	42	39	79	75	65	78	57	102	53	52	74	34	60
11068	NM_201546	chr1	54604667	54618679	-	CDCP2	Unmarked	0.667	0.074	22	1.031	56	42	85	50	34	60	88	55	76	55	96	57	67	79	15	84
15283	NM_001031672	chr1	54638026	54665746	-	CYB5RL	H3K4me3-only	361	45.125	17.333	0.722	48	34	78	42	27	44	69	63	66	45	75	97	60	80	61	110
14425	NM_016491	chr1	54665839	54684056	+	MRPL37	H3K4me3-only	378.333	43.652	18	0.74	39	30	74	49	27	47	59	65	60	43	113	96	66	78	66	87
15366	NM_001009955	chr1	54691103	54872068	-	SSBP3	H3K4me3-only	138	69	17.333	1.209	19	12	89	17	8	15	33	31	71	24	179	171	39	36	143	112
23828	NR_103541	chr1	54702115	54704736	+	C1orf191	Unmarked	2.333	0.583	10	0.625	62	66	62	41	56	124	81	69	42	69	54	49	70	72	17	65
10067	NM_015547	chr1	55013806	55100417	+	ACOT11	Unmarked	4.667	0.539	23.666	0.816	33	32	79	34	18	45	93	60	67	48	141	87	60	91	30	81
16659	NM_176782	chr1	55074849	55089200	-	FAM151A	Unmarked	2.333	0.538	16.333	1.14	38	49	86	38	35	63	66	72	62	46	105	70	77	77	26	89
11246	NR_026782	chr1	55107426	55175939	+	MROH7	Unmarked	0.333	0.053	21.666	1.161	56	46	89	43	38	66	78	65	71	53	111	52	70	82	8	71
11250	NR_037639	chr1	55107426	55208328	+	HEATR8-TTC4	Unmarked	0.333	0.053	21.666	1.161	56	46	89	43	38	66	78	65	71	53	111	52	70	82	8	71
9837	NM_004623	chr1	55181494	55208328	+	TTC4	H3K4me3-only	195.333	29.298	24	1.091	52	36	70	54	32	52	58	67	66	41	99	76	62	80	55	99
21600	NM_152268	chr1	55222570	55230226	-	PARS2	H3K4me3-only	246.667	28.46	12.333	0.521	64	30	70	42	37	58	69	62	58	65	110	80	47	73	64	70
3353	NM_001114108	chr1	55246751	55266941	-	TTC22	Bivalent	30.667	6.133	103.667	4.443	35	15	86	52	14	31	62	50	68	31	110	118	70	81	69	107
8403	NM_001110533	chr1	55271735	55307937	+	C1orf177	Unmarked	0.667	0.2	28	1.556	50	27	79	45	23	47	66	57	46	47	121	92	83	72	39	105
12077	NM_014762	chr1	55315299	55352921	-	DHCR24	H3K4me3-only	297	68.544	20.333	0.753	35	18	60	40	13	21	65	50	54	45	124	134	51	64	109	116
2385	NM_182532	chr1	55446464	55457966	+	TMEM61	Bivalent	65.667	16.417	161.333	6.722	25	10	58	41	10	35	59	58	45	39	143	119	53	78	86	140
1894	NM_057176	chr1	55464616	55474465	+	BSND	H3K27me3-only	2.333	0.304	209	9.358	36	41	76	37	34	43	98	63	50	67	102	77	71	87	20	97
1153	NM_174936	chr1	55505148	55530526	+	PCSK9	Bivalent	91.333	9.133	327.333	12.123	44	24	91	33	22	41	64	62	59	55	110	106	67	70	65	86
6800	NM_015306	chr1	55532031	55681039	-	USP24	H3K4me3-only	333.333	49.997	36.333	1.627	28	14	64	43	10	19	41	37	57	21	160	154	54	53	127	117
6873	NR_038320	chr1	55681080	55683128	+	LOC100507634	H3K4me3-only	341.333	48.762	35.667	1.621	22	17	55	23	10	29	55	59	40	42	115	146	45	65	119	157
22863	NR_039618	chr1	55691313	55691396	+	MIR4422	Unmarked	5.333	1.333	11	0.673	109	70	71	42	64	112	67	73	49	54	47	38	70	80	3	50
14074	NM_003713	chr1	56960418	57045257	-	PPAP2B	H3K4me3-only	205	43.925	18.333	0.833	75	32	91	41	40	102	43	56	57	40	83	87	67	67	49	69
5645	NM_006252	chr1	57110989	57181008	+	PRKAA2	H3K4me3-only	227.333	61.994	47.333	1.919	16	11	54	32	8	33	42	77	46	37	119	127	43	79	115	160
11137	NM_001004303	chr1	57184476	57285369	-	C1orf168	Unmarked	12	1.565	21.667	0.916	52	29	78	45	24	61	93	55	56	52	103	79	73	90	16	93
23749	NM_000562	chr1	57320442	57383894	+	C8A	Unmarked	1	0.333	10.333	0.62	89	80	68	45	71	108	86	61	62	64	48	34	60	74	6	43
17606	NM_001278543	chr1	57394882	57431813	-	C8B	Unmarked	2.667	0.4	15.666	0.87	87	58	75	59	58	86	86	55	50	57	50	58	83	84	5	48
2553	NM_021080	chr1	57463578	58716211	-	DAB1	Bivalent	124	23.251	148.333	6.846	39	23	81	48	31	19	91	47	64	56	92	112	57	90	60	89
18375	NM_145243	chr1	58946390	59012446	-	OMA1	H3K4me3-only	105	12.115	15	0.608	40	34	72	41	32	57	59	56	60	48	133	91	54	65	68	89
2124	NM_002353	chr1	59041094	59043166	-	TACSTD2	Bivalent	44	8.251	185	10.472	45	30	77	54	35	36	63	52	72	58	104	84	54	62	75	98
19297	NM_001085487	chr1	59120410	59165747	-	MYSM1	H3K4me3-only	256	48.003	14.333	0.729	54	30	73	45	25	46	61	60	70	45	136	83	53	71	64	83
2323	NM_002228	chr1	59246462	59249785	-	JUN	Bivalent	141.667	60.723	165.667	7.203	45	18	96	42	18	34	52	47	71	46	121	102	66	53	72	116
4536	NR_034015	chr1	59250822	59365384	+	LOC100131060	Bivalent	170.333	25.549	66	3.143	52	29	69	55	33	47	51	65	54	62	110	77	66	59	72	98
5496	NR_027120	chr1	59597607	59612479	-	HSD52	H3K4me3-only	44	6.6	49.333	2.467	53	29	59	51	36	78	61	72	51	43	69	79	51	97	53	117
9706	NM_001113411	chr1	59762624	60228402	+	FGGY	H3K4me3-only	122.667	18.399	24.333	1.028	30	23	64	36	36	73	54	62	37	46	102	111	50	82	77	116
9734	NR_103473	chr1	59762683	60165066	+	FGGY	H3K4me3-only	119.667	17.949	24.333	1.028	30	27	61	35	41	84	55	62	34	47	103	106	47	84	71	112
21190	NM_001244714	chr1	59775749	60228402	+	FGGY	Unmarked	4.667	1.167	12.667	0.974	110	72	72	38	50	94	84	59	66	55	64	45	66	66	10	48
23606	NM_001278224	chr1	59981300	60228402	+	FGGY	Unmarked	2	0.6	10.333	1	63	77	58	42	57	128	95	55	73	50	75	37	47	80	6	56
12561	NR_039861	chr1	60198898	60198968	-	MIR4711	Unmarked	1.667	0.278	20	1.071	104	49	102	51	35	66	74	48	80	57	89	53	88	51	13	39
8830	NM_015888	chr1	60280532	60342050	+	HOOK1	H3K4me3-only	149	27.939	26.667	1.356	20	13	76	41	14	18	63	51	66	50	145	116	50	65	93	118
4076	NM_000775	chr1	60358979	60392423	-	CYP2J2	Bivalent	67.667	16.917	77	5.5	62	43	60	52	44	69	84	56	60	52	94	76	51	89	43	64
9484	NM_152377	chr1	60456065	60539442	-	C1orf87	H3K4me3-only	66.667	13.333	25	1.364	61	38	82	51	30	64	64	62	75	47	97	63	67	71	39	88
4140	NM_001145511	chr1	61542945	61928460	+	NFIA	Bivalent	133.333	23.528	75	3.409	105	49	87	48	45	82	57	40	78	39	71	78	60	55	51	54
1612	NM_001145512	chr1	61547533	61928460	+	NFIA	Bivalent	70.333	17.583	244.333	14.373	67	40	72	44	35	68	58	56	65	43	101	81	56	66	58	89
1439	NM_001134673	chr1	61547979	61928460	+	NFIA	Bivalent	125.667	41.889	272	15.693	44	27	73	42	30	46	50	56	56	37	116	117	55	73	87	90
21067	NR_073400	chr1	62119913	62121800	+	MGC34796	Unmarked	1	0.158	13	0.736	79	34	62	48	25	40	87	61	62	47	85	91	56	92	52	78
20129	NM_032027	chr1	62146718	62191095	-	TM2D1	H3K4me3-only	253.666	26.24	13.666	0.732	87	44	65	51	39	81	57	79	60	54	73	49	61	76	42	81
18066	NM_176877	chr1	62208148	62629591	+	INADL	H3K4me3-only	220.333	47.211	15.333	0.793	34	23	53	36	14	33	44	61	47	38	127	112	50	58	100	169
11796	NM_019079	chr1	62660473	62678001	+	L1TD1	H3K4me3-only	300	40.911	20.667	0.861	43	28	101	23	27	41	68	42	74	71	186	80	51	38	56	70
1115	NM_181712	chr1	62701836	62785083	-	KANK4	Bivalent	89	16.689	334.333	15.197	51	20	68	43	25	56	64	52	55	51	97	106	50	70	81	110
19803	NM_001017415	chr1	62901974	62917475	+	USP1	H3K4me3-only	200.333	37.565	14	0.712	63	33	61	47	27	58	61	55	60	35	93	106	54	75	80	91
18892	NM_003368	chr1	62902382	62917475	+	USP1	H3K4me3-only	220	36.667	14.666	0.772	50	23	57	40	20	58	63	58	56	49	105	116	43	69	102	90
12793	NM_001272002	chr1	63049775	63154039	-	DOCK7	H3K4me3-only	282	76.902	19.666	1.093	31	18	66	21	13	47	36	70	45	33	117	138	47	68	114	135
26631	NM_014495	chr1	63063157	63071976	+	ANGPTL3	Unmarked	2	0.6	6	0.439	156	88	74	54	78	116	52	57	65	44	24	24	72	56	7	32
22079	NM_178221	chr1	63249776	63330941	+	ATG4C	H3K4me3-only	326.667	54.444	12	0.783	49	42	64	28	38	104	93	69	53	64	91	78	43	93	39	51
3288	NR_038252	chr1	63624753	63782901	-	LINC00466	Bivalent	64.667	10.778	106.667	4.849	35	22	63	35	11	42	40	65	53	24	121	124	56	69	98	141
3449	NM_012183	chr1	63788729	63790797	+	FOXD3	Bivalent	184.333	32.527	99.667	4.333	21	15	72	46	12	13	45	34	70	25	127	143	50	52	121	153
9762	NM_013339	chr1	63833260	63904233	+	ALG6	H3K4me3-only	180.333	25.762	24.333	1.141	32	17	72	37	15	37	58	59	52	44	142	114	59	72	80	109
21813	NM_001206739	chr1	63906440	63988944	-	ITGB3BP	H3K4me3-only	310.667	32.137	12.333	0.514	50	48	78	49	44	85	60	74	66	53	63	72	65	78	52	62
21889	NM_032437	chr1	63989012	64038364	+	EFCAB7	H3K4me3-only	300.333	31.068	12.333	0.514	84	51	81	51	47	55	62	62	78	47	62	71	58	73	53	64
25029	NR_002771	chr1	64014650	64016307	+	DLEU2L	Unmarked	3.667	0.688	8.666	0.491	81	70	77	42	67	126	67	67	70	46	49	43	52	86	14	42
11069	NM_002633	chr1	64058946	64125916	+	PGM1	H3K4me3-only	230	38.333	22	0.985	60	33	83	54	36	53	47	53	59	45	86	86	75	57	60	112
9170	NM_001172819	chr1	64059479	64125916	+	PGM1	H3K4me3-only	353.333	50.476	25.667	1.149	24	17	68	37	17	22	50	65	52	39	102	130	54	76	102	144
21617	NM_001172818	chr1	64088886	64125916	+	PGM1	Unmarked	3	0.409	12.333	0.481	86	60	73	52	45	96	92	52	77	54	71	44	63	76	10	48
10582	NM_001083592	chr1	64239689	64609052	+	ROR1	H3K4me3-only	239.667	35.948	22.666	0.944	44	19	95	37	17	26	64	40	86	44	124	121	47	58	93	84
25488	NM_152489	chr1	64669489	64710027	+	UBE2U	Unmarked	1	0.2	8	0.545	72	54	69	55	57	85	78	58	63	65	63	52	58	74	33	63
5161	NM_020925	chr1	64936475	65158741	+	CACHD1	Bivalent	354.667	118.222	54.333	3.018	19	20	49	40	12	33	55	71	49	31	103	127	48	86	104	152
24267	NR_039957	chr1	65045529	65045604	+	MIR4794	Unmarked	1.333	0.286	9.666	0.527	124	98	67	42	84	122	86	43	72	60	40	26	51	55	5	24
11012	NM_018211	chr1	65210777	65298914	+	RAVER2	H3K4me3-only	233	139.856	22	1.941	16	9	63	25	4	19	48	56	58	33	166	144	35	66	124	133
5060	NM_002227	chr1	65298905	65432187	-	JAK1	H3K4me3-only	201.667	75.616	56	2.471	20	19	75	29	22	26	45	45	63	38	168	139	38	56	119	97
22028	NR_037443	chr1	65523437	65523525	-	MIR3671	Unmarked	2.333	0.467	12	0.72	91	78	75	54	72	94	74	56	62	51	46	42	73	73	7	51
23744	NR_029516	chr1	65524116	65524191	-	MIR101-1	Unmarked	1	0.273	10.333	0.544	78	79	80	47	68	91	81	62	72	59	53	38	67	72	8	44
2630	NM_203464	chr1	65613231	65697828	+	AK4	Bivalent	144.333	19.683	143	7.944	33	24	67	35	20	46	57	55	56	45	136	120	51	63	96	95
2645	NM_001005353	chr1	65613512	65697828	+	AK4	Bivalent	170	28.333	142.333	7.763	18	9	76	25	13	33	60	45	64	50	180	129	33	58	108	98
2656	NM_013410	chr1	65613849	65697828	+	AK4	Bivalent	150.333	37.583	141.333	7.187	19	13	68	29	8	33	61	49	64	47	180	123	38	58	105	104
6590	NM_001256865	chr1	65730376	65881552	+	DNAJC6	H3K4me3-only	60	6.429	38	1.81	88	79	72	45	64	74	74	58	59	47	50	57	72	70	17	73
6099	NM_001256864	chr1	65775217	65881552	+	DNAJC6	H3K4me3-only	111	22.2	42.333	2.54	29	19	55	38	20	74	41	78	44	38	88	102	48	82	87	156
18714	NM_001198683	chr1	65886130	65893692	+	LEPROT	H3K4me3-only	169.667	33.933	14.667	0.667	14	12	73	27	15	38	66	56	63	53	210	110	34	72	87	69
16913	NM_002303	chr1	65886334	66103176	+	LEPR	H3K4me3-only	198.667	45.85	16	0.787	16	9	67	27	15	54	62	64	52	52	178	113	36	80	88	86
17016	NM_001198681	chr1	65886398	65901690	+	LEPROT	H3K4me3-only	208.333	52.083	16	0.762	21	12	62	28	16	62	60	65	48	51	171	110	38	78	87	90
2358	NM_001198688	chr1	65991371	66091917	+	LEPR	Bivalent	96	22.156	163	9.78	19	12	55	51	14	37	49	64	51	29	123	119	54	85	95	142
784	NM_001037341	chr1	66258192	66840262	+	PDE4B	Bivalent	79	14.813	422.333	18.633	30	26	75	44	24	43	76	57	61	64	130	92	60	67	65	85
774	NM_002600	chr1	66258855	66840262	+	PDE4B	Bivalent	107	13.956	426.667	19.692	25	21	82	36	20	40	60	53	68	41	136	118	51	71	85	92
21821	NM_001037340	chr1	66458389	66840262	+	PDE4B	Unmarked	2.333	0.5	12.333	0.771	93	69	77	52	55	115	85	54	68	51	39	56	76	73	13	23
15588	NM_001037339	chr1	66797792	66840262	+	PDE4B	H3K4me3-only	59	8.046	17	0.761	87	51	94	53	44	83	67	57	81	46	63	52	72	71	19	59
4754	NM_032291	chr1	66999824	67210768	+	SGIP1	Bivalent	64.667	10.211	61.334	3.173	80	40	90	38	35	70	84	45	72	50	100	80	61	74	29	51
24634	NR_036060	chr1	67094122	67094200	+	MIR3117	Unmarked	0.333	0.25	9.333	0.528	85	89	64	55	65	98	78	64	63	55	42	35	80	62	12	52
4056	NM_152665	chr1	67218139	67244730	+	TCTEX1D1	Bivalent	89	13.349	77.666	3.149	56	33	69	38	20	48	68	65	60	43	116	86	61	77	51	108
24729	NM_005478	chr1	67263423	67266942	-	INSL5	Unmarked	0.333	0.111	9	0.75	87	76	69	39	62	113	80	74	49	62	48	43	73	78	6	40
16500	NM_207014	chr1	67303281	67390570	-	WDR78	H3K4me3-only	250	53.568	16.333	0.754	48	22	79	43	23	35	49	62	57	36	109	104	63	77	69	123
16553	NM_001146111	chr1	67390577	67454302	+	MIER1	H3K4me3-only	250	53.568	16.333	0.754	34	22	77	34	22	49	63	59	62	43	123	104	49	79	69	110
25566	NM_001077704	chr1	67395925	67454302	+	MIER1	H3K4me3-only	152.333	30.467	8	0.511	31	29	64	32	23	52	69	53	57	50	129	110	44	67	84	105
8159	NM_015139	chr1	67465014	67520080	-	SLC35D1	H3K4me3-only	160.333	24.049	29	1.554	56	31	68	43	31	59	63	62	55	51	87	90	56	75	64	108
11457	NM_001276351	chr1	67557858	67600654	-	C1orf141	H3K4me3-only	37	6.938	21.333	1.524	83	47	76	42	38	98	64	59	78	51	106	52	49	63	41	52
25764	NM_144701	chr1	67632168	67725650	+	IL23R	Unmarked	0.333	0.083	7.666	0.676	131	104	67	42	83	109	75	51	62	54	36	34	69	51	7	24
2356	NR_047584	chr1	67773046	67862583	+	IL12RB2	Bivalent	73.333	13.751	163.333	12.25	53	49	75	52	47	72	61	51	65	44	78	82	64	66	56	84
13048	NM_001018068	chr1	67873492	67896123	-	SERBP1	H3K4me3-only	253.667	33.086	19.333	0.734	56	15	93	47	14	37	55	47	75	45	105	107	65	56	80	102
11698	NM_001924	chr1	68150859	68154021	+	GADD45A	H3K4me3-only	137.333	22.889	21	0.759	67	26	83	37	33	44	62	40	63	32	100	113	50	76	64	109
3196	NM_018841	chr1	68167148	68299155	-	GNG12	Bivalent	157	47.105	110.666	6.385	38	14	91	37	17	26	38	47	78	42	181	103	47	45	95	100
3613	NR_040077	chr1	68297970	68668670	+	GNG12-AS1	Bivalent	164.667	21.477	93.666	4.93	106	47	66	64	45	63	56	55	58	43	59	67	73	66	46	85
3080	NM_004675	chr1	68511644	68516460	-	DIRAS3	Bivalent	20	5	116.333	8.116	77	42	65	45	56	127	68	58	42	68	54	64	55	71	41	66
892	NM_001193334	chr1	68591040	68698229	-	WLS	Bivalent	113.667	21.314	389.667	22.481	87	35	91	31	29	65	57	59	74	42	115	77	54	68	44	71
922	NM_024911	chr1	68591040	68698284	-	WLS	Bivalent	111	17.527	380.334	21.943	86	33	91	31	26	64	59	57	74	44	124	76	55	64	45	70
20516	NR_031664	chr1	68649200	68649293	-	MIR1262	Unmarked	1.667	0.556	13.333	0.93	98	91	62	47	72	107	85	60	66	57	53	27	63	69	3	39
24299	NM_000329	chr1	68894506	68915642	-	RPE65	Unmarked	0.667	0.167	9.666	0.763	91	68	79	42	61	95	77	57	70	51	84	36	57	76	2	53
19650	NM_017779	chr1	68939834	68962799	-	DEPDC1	H3K4me3-only	219	36.5	14	0.667	48	33	79	50	31	50	53	61	69	42	84	94	61	70	74	100
27497	NM_020794	chr1	70225857	70589171	+	LRRC7	Unmarked	1	0.188	4	0.25	110	99	52	47	81	118	75	57	61	52	38	33	56	63	18	39
26146	NR_023916	chr1	70385004	70386000	+	PIN1P1	Unmarked	1.333	0.666	7	0.6	108	58	95	46	52	64	47	48	67	43	81	66	80	47	33	64
20742	NM_017768	chr1	70610484	70671361	-	LRRC40	H3K4me3-only	429.333	64.397	13.333	0.741	68	26	88	54	37	72	50	59	62	50	75	79	68	70	53	88
20669	NM_004768	chr1	70671364	70717701	+	SRSF11	H3K4me3-only	429	64.347	13.333	0.741	74	26	70	50	38	68	68	61	59	53	88	79	50	88	53	74
12847	NM_030816	chr1	70724684	70820417	-	ANKRD13C	H3K4me3-only	415	31.126	19.666	0.686	35	35	69	37	26	56	71	68	62	52	102	99	53	78	73	83
12802	NM_001036646	chr1	70820492	70833705	+	HHLA3	H3K4me3-only	391.333	28.633	19.666	0.678	58	35	82	51	25	38	54	62	72	41	84	95	71	65	71	95
13451	NM_153742	chr1	70876900	70905534	+	CTH	H3K4me3-only	316.667	41.303	19	0.983	57	34	58	61	36	62	65	72	43	56	81	80	74	83	56	81
1547	NM_198717	chr1	71318035	71513491	-	PTGER3	Bivalent	105.333	22.57	253.333	14.34	38	21	78	47	22	43	48	59	56	41	95	111	67	68	82	123
1630	NR_038420	chr1	71512188	71532865	+	ZRANB2-AS1	H3K27me3-only	4.667	0.824	242.333	12.982	82	34	78	59	34	27	68	47	64	45	81	93	72	70	56	89
9574	NM_203350	chr1	71528973	71546972	-	ZRANB2	H3K4me3-only	160.333	60.117	24.667	1.609	98	53	66	51	59	93	69	54	57	65	65	46	54	64	32	73
25420	NR_029707	chr1	71533313	71533399	-	MIR186	Unmarked	1	0.375	8	0.727	125	90	68	40	92	126	65	43	41	58	47	39	64	52	5	44
9749	NR_046217	chr1	71547006	71703406	+	ZRANB2-AS2	H3K4me3-only	147.333	49.111	24.333	1.698	94	53	64	66	59	96	55	56	54	52	73	46	70	66	32	63
5359	NM_173808	chr1	71868624	72748277	-	NEGR1	H3K4me3-only	159	34.069	51.333	2.8	95	22	66	40	17	41	78	46	63	41	102	103	49	77	63	96
26019	NR_046218	chr1	72259914	72302695	-	NEGR1-IT1	Unmarked	4	1.091	7	0.568	102	80	78	36	82	122	68	70	57	66	39	30	56	73	7	33
25775	NM_001105659	chr1	74491701	74663871	-	LRRIQ3	H3K4me3-only	121	13.961	7.666	0.479	70	46	67	49	50	74	60	67	50	48	58	71	62	82	42	103
25759	NM_001199327	chr1	74663895	74930609	+	FPGT-TNNI3K	H3K4me3-only	122.333	13.593	7.666	0.479	75	48	84	49	52	75	62	47	69	49	95	70	60	64	42	58
25818	NM_001199329	chr1	74663895	74674386	+	FPGT	H3K4me3-only	122.333	13.593	7.666	0.479	75	48	84	49	52	75	62	47	69	49	95	70	60	64	42	58
26390	NM_015978	chr1	74701070	75010116	+	TNNI3K	Unmarked	1.333	0.364	6.666	0.345	127	117	47	49	108	147	69	46	56	44	29	22	49	63	5	21
3666	NM_001002912	chr1	75033794	75139422	-	C1orf173	Bivalent	68.333	8.542	91.333	5.269	61	29	77	41	24	55	60	61	55	41	102	91	69	75	50	108
20282	NM_001134759	chr1	75171171	75199092	-	CRYZ	H3K4me3-only	259.667	41.002	13.666	0.774	81	56	77	49	44	71	60	72	60	45	73	67	78	75	34	57
19795	NM_001162916	chr1	75198835	75232360	+	TYW3	H3K4me3-only	268.667	53.733	14	0.792	64	42	85	49	35	67	67	60	76	45	84	70	66	75	39	75
19512	NM_138467	chr1	75198839	75232360	+	TYW3	H3K4me3-only	270.667	54.133	14	0.792	64	42	85	49	35	67	67	60	75	46	85	70	66	75	38	75
19881	NR_027962	chr1	75198861	75232360	+	TYW3	H3K4me3-only	276	59.139	14	0.792	63	44	84	49	36	69	68	61	76	45	81	69	65	76	38	75
757	NM_001001933	chr1	75594118	75627218	+	LHX8	H3K27me3-only	1.667	0.238	431	23.944	97	50	83	53	44	73	68	56	62	55	65	65	80	63	30	55
870	NM_001256114	chr1	75600566	75627218	+	LHX8	Bivalent	95.667	14.349	397	19.525	57	33	80	48	31	70	74	62	72	58	96	73	58	76	49	62
16778	NM_001130058	chr1	75667815	76076799	-	SLC44A5	Unmarked	0.333	0.091	16.333	1.289	84	93	71	57	96	89	75	58	63	65	48	23	63	70	5	39
20763	NM_001127328	chr1	76190042	76229355	+	ACADM	H3K4me3-only	188	23.5	13.333	0.563	66	41	73	52	35	51	42	57	57	43	91	82	73	50	68	118
20018	NM_004582	chr1	76251878	76260775	+	RABGGTB	H3K4me3-only	252	30.241	13.667	0.695	73	54	71	45	52	82	74	63	60	55	79	62	57	80	33	59
18112	NR_003042	chr1	76252756	76252834	+	SNORD45C	H3K4me3-only	275	48.527	15.333	0.708	97	80	66	48	67	138	87	46	80	60	48	31	47	61	18	25
22660	NR_002749	chr1	76253573	76253657	+	SNORD45A	H3K4me3-only	151	23.843	11.333	0.507	92	80	71	47	81	120	87	46	67	65	50	36	50	68	10	29
24090	NR_002748	chr1	76255161	76255232	+	SNORD45B	H3K4me3-only	31	13.288	10	0.638	99	97	73	47	92	106	93	48	75	69	42	26	51	66	4	11
19135	NM_002440	chr1	76262555	76378923	+	MSH4	Unmarked	4.666	0.7	14.333	0.573	42	48	74	38	36	61	94	64	60	75	102	71	64	71	38	61
25841	NR_026546	chr1	76384557	76398116	-	ASB17	Unmarked	1.333	0.21	7.333	0.449	101	87	57	67	78	95	81	58	60	58	39	28	73	72	7	38
7517	NM_152996	chr1	76540388	77096669	+	ST6GALNAC3	H3K4me3-only	187.333	37.467	32	1.315	51	35	74	39	21	58	76	50	69	49	107	96	58	63	65	88
3878	NM_030965	chr1	77333185	77529737	+	ST6GALNAC5	Bivalent	190.333	47.583	83.333	5.102	93	57	72	42	44	64	52	63	75	39	92	66	52	62	56	70
24318	NM_005482	chr1	77554666	77685132	-	PIGK	H3K4me3-only	293.333	33.845	9.666	0.483	101	51	70	56	53	80	55	62	51	52	57	60	73	67	39	72
1954	NM_174858	chr1	77747661	78025654	+	AK5	Bivalent	169.333	28.222	202.333	9.197	33	24	67	42	22	29	58	50	59	41	107	122	51	66	97	131
2185	NM_012093	chr1	77748286	78025654	+	AK5	Bivalent	216.333	46.354	178	8.476	41	18	91	38	13	34	58	55	70	40	127	108	65	68	68	105
19701	NM_015534	chr1	78030189	78148343	-	ZZZ3	H3K4me3-only	341.667	37.963	14	0.656	42	36	61	47	37	76	70	66	58	64	102	77	49	74	67	73
23402	NM_201624	chr1	78161673	78225564	-	USP33	H3K4me3-only	179.667	41.465	10.666	0.82	74	34	77	25	28	61	72	52	71	55	114	89	36	64	66	81
23310	NM_198549	chr1	78245308	78345225	+	FAM73A	H3K4me3-only	188.333	40.354	10.666	0.842	66	42	76	47	37	87	59	57	63	43	108	70	65	68	41	70
13469	NR_103535	chr1	78347032	78355224	-	NEXN-AS1	H3K4me3-only	140.333	28.067	19	1.583	103	65	61	67	68	89	56	55	53	47	76	45	71	67	28	48
9694	NM_144573	chr1	78354199	78409578	+	NEXN	H3K4me3-only	208	69.333	24.333	1.46	46	17	85	41	25	42	65	41	62	43	149	104	55	71	60	93
15780	NM_003902	chr1	78413590	78444777	-	FUBP1	H3K4me3-only	442	41.44	17	0.797	59	27	70	61	32	66	53	70	63	54	57	84	63	74	78	88
27160	NM_007034	chr1	78470635	78482995	+	DNAJB4	H3K4me3-only	22.333	4.785	5	0.246	113	77	79	37	82	119	67	59	73	55	49	33	38	76	15	27
2481	NM_017655	chr1	78511588	78603112	+	GIPC2	Bivalent	118.667	25.432	154.333	7.468	55	29	85	33	31	40	53	52	65	45	127	111	51	62	83	77
5394	NR_027310	chr1	78695282	78835147	+	MGC27382	H3K27me3-only	2.333	0.5	50.666	3.102	108	91	69	41	78	129	74	65	61	60	28	27	62	66	5	35
2024	NM_000959	chr1	78956727	79006386	+	PTGFR	Bivalent	100	21.427	194.333	9.717	45	40	79	47	26	55	62	69	73	33	85	91	66	84	56	88
23721	NM_006820	chr1	79086087	79111830	+	IFI44L	Unmarked	1.667	0.417	10.333	0.674	91	72	69	49	71	145	67	68	48	57	31	39	70	77	8	37
19637	NM_006417	chr1	79115476	79129763	+	IFI44	Unmarked	1	0.75	14	1.273	96	89	76	32	83	145	72	61	57	54	36	41	57	73	3	24
14673	NM_022159	chr1	79355448	79472495	-	ELTD1	H3K4me3-only	106.333	21.267	17.999	1.227	63	48	66	53	36	83	65	64	71	44	89	57	61	73	40	86
18853	NM_012302	chr1	82266081	82458107	+	LPHN2	H3K4me3-only	239	51.211	14.666	0.8	94	34	81	41	36	60	61	53	68	52	106	81	51	64	59	58
24881	NR_049805	chr1	84259597	84379059	-	MIR548AP	Unmarked	2	0.375	8.999	0.658	115	90	70	44	98	126	69	51	44	67	35	32	62	62	3	31
2902	NM_024686	chr1	84335056	84464833	-	TTLL7	Bivalent	215.667	58.813	125.333	6.836	34	20	76	35	11	34	58	64	65	50	128	100	55	63	82	124
19450	NM_002731	chr1	84543744	84704181	+	PRKACB	H3K4me3-only	329	70.495	14.333	1	19	11	68	43	9	24	51	49	60	33	123	139	53	65	113	139
27469	NM_182948	chr1	84609951	84704181	+	PRKACB	Unmarked	2	2	4	0.4	110	86	71	52	92	157	70	41	46	57	22	40	70	60	2	23
25843	NM_001242858	chr1	84630064	84704181	+	PRKACB	Unmarked	1.333	0.444	7.333	0.579	101	101	57	38	85	123	82	61	46	58	35	45	65	69	10	23
25037	NM_001242861	chr1	84630648	84704181	+	PRKACB	Unmarked	1.333	0.444	8.666	0.578	104	99	61	30	103	150	79	49	50	62	35	38	38	70	9	22
27692	NM_001242862	chr1	84647342	84704181	+	PRKACB	Unmarked	0.667	0.2	3.333	0.37	111	110	56	42	100	135	66	64	46	44	29	32	61	77	0	26
9707	NM_001010971	chr1	84764048	84816481	+	SAMD13	H3K4me3-only	185.333	46.333	24.333	1.587	96	37	55	49	36	48	68	63	49	47	79	80	56	83	54	99
23724	NM_001134663	chr1	84767288	84816481	+	SAMD13	Unmarked	2.666	0.666	10.333	0.775	98	75	75	37	68	114	93	55	59	65	45	47	59	76	4	29
24533	NM_001134664	chr1	84768333	84816481	+	SAMD13	H3K4me3-only	12.667	3.454	9.333	0.718	102	71	67	63	57	126	67	54	58	47	49	43	86	61	13	35
24982	NR_003927	chr1	84830640	84863576	-	UOX	Unmarked	0.333	0.062	8.666	0.5	123	92	60	49	75	88	77	64	55	50	44	35	71	75	3	38
23591	NM_021233	chr1	84864214	84880691	+	DNASE2B	Unmarked	0.667	0.091	10.333	0.574	107	63	72	58	42	85	76	58	65	39	53	56	85	74	12	54
26619	NM_058248	chr1	84874033	84880691	+	DNASE2B	Unmarked	0.333	0.083	6	0.45	104	109	60	59	86	91	75	52	61	42	43	34	81	61	3	38
4874	NM_025065	chr1	84944919	84964033	+	RPF1	Bivalent	216	32.398	59.333	3.56	90	41	72	42	41	82	58	64	48	54	89	80	66	69	52	51
8385	NM_005274	chr1	84964005	84972262	-	GNG5	H3K4me3-only	176	37.712	28	1.424	81	21	63	58	32	40	39	77	51	38	76	83	59	89	70	122
8761	NM_004388	chr1	85018803	85040163	-	CTBS	H3K4me3-only	137.333	24.234	27	1.884	52	28	74	57	38	55	47	60	65	34	63	90	56	82	69	129
18155	NR_027379	chr1	85093912	85100703	-	C1orf180	Unmarked	2.666	0.727	15.333	0.979	76	62	81	48	56	79	99	55	70	67	60	47	65	80	5	49
14207	NM_001166417	chr1	85109389	85156151	-	SSX2IP	H3K4me3-only	186.667	43.08	18.333	0.821	28	9	72	32	10	31	58	35	64	40	187	139	39	54	113	88
14734	NM_014021	chr1	85109389	85156240	-	SSX2IP	H3K4me3-only	181	38.783	17.667	0.803	29	11	65	36	13	38	59	40	61	40	168	133	38	61	110	97
3772	NM_012152	chr1	85279085	85358896	-	LPAR3	Bivalent	139	29.784	86.667	4.063	32	11	64	37	18	43	56	59	45	47	144	121	48	75	94	105
1113	NM_153259	chr1	85391265	85462796	-	MCOLN2	Bivalent	144	28.8	334.334	14.536	35	19	64	38	22	51	60	54	52	44	124	112	47	73	84	120
1771	NM_018298	chr1	85483764	85514223	-	MCOLN3	Bivalent	102	25.5	223.667	13.694	37	14	72	37	11	16	53	47	61	33	162	129	52	64	98	113
10762	NM_145172	chr1	85527992	85598821	+	WDR63	H3K4me3-only	71	11.211	22.333	1.367	76	41	89	53	46	73	65	69	65	54	71	62	72	85	27	51
22025	NR_039619	chr1	85599476	85599556	+	MIR4423	Unmarked	2.333	0.538	12	0.783	131	81	90	50	64	74	70	39	78	42	58	43	79	50	3	47
17059	NM_032184	chr1	85623355	85666728	-	SYDE2	H3K4me3-only	292.667	97.556	16	0.716	10	9	73	47	8	8	39	43	68	23	164	141	52	58	121	135
13678	NR_024113	chr1	85715636	85725355	-	C1orf52	H3K4me3-only	221.667	28.912	18.667	0.824	54	28	81	41	21	47	56	64	75	39	109	86	55	73	63	107
16598	NM_003921	chr1	85731459	85742587	-	BCL10	H3K4me3-only	107.667	11.963	16.333	0.71	73	37	74	49	43	45	72	43	69	61	89	83	47	60	67	87
18108	NR_045484	chr1	85742040	85743771	+	LOC646626	H3K4me3-only	348.667	38.741	15.333	0.622	34	22	73	40	18	41	50	78	63	46	113	99	53	79	85	105
1751	NM_001134445	chr1	85784167	86044046	-	DDAH1	Bivalent	45	5.4	226	8.169	66	55	74	45	44	95	76	56	64	60	92	54	66	61	28	63
2929	NM_012137	chr1	85784167	85930889	-	DDAH1	Bivalent	136.667	19.524	123.334	7.116	45	12	65	55	19	26	51	47	56	38	109	135	57	67	112	105
6233	NM_001554	chr1	86046443	86049648	+	CYR61	H3K4me3-only	292.333	67.467	41	1.783	45	16	52	100	12	45	40	63	50	34	60	89	106	64	82	141
20546	NM_017953	chr1	86115105	86174116	-	ZNHIT6	H3K4me3-only	209.333	34.889	13.333	0.615	59	47	111	36	51	56	62	44	83	61	125	67	60	48	39	50
759	NM_152890	chr1	86194915	86622121	-	COL24A1	Bivalent	81.667	17.499	430.667	20.508	41	20	68	40	24	82	59	78	51	49	62	83	53	91	57	141
23923	NM_001184765	chr1	86812506	86862025	-	ODF2L	H3K4me3-only	176.667	29.445	10	0.545	68	25	63	55	41	76	53	57	45	41	83	90	58	84	60	100
25730	NM_006536	chr1	86889768	86922240	+	CLCA2	Unmarked	1.666	0.454	7.666	0.434	95	70	83	49	49	77	81	56	76	40	58	51	78	76	2	58
22727	NM_001285	chr1	86934525	86965974	+	CLCA1	Unmarked	2	0.5	11.333	0.68	108	93	67	52	72	81	78	51	60	59	61	36	80	49	10	42
26074	NM_012128	chr1	87012758	87046432	+	CLCA4	Unmarked	1.333	0.308	7	0.488	134	104	63	59	96	102	60	48	56	49	45	24	74	50	6	29
27723	NR_024604	chr1	87099958	87121059	+	CLCA3P	Unmarked	3.666	1.1	3	0.375	101	97	54	48	79	113	68	65	42	47	33	38	78	68	5	63
12343	NM_016009	chr1	87170252	87213867	+	SH3GLB1	H3K4me3-only	268.333	42.371	20	0.779	41	30	47	43	25	40	52	69	48	47	97	111	47	69	106	127
17739	NM_004261	chr1	87328127	87380107	-	SEP15	H3K4me3-only	256.333	40.476	15.333	0.708	57	26	64	40	27	58	64	62	56	49	73	100	47	78	78	120
17857	NM_012262	chr1	87380334	87575681	+	HS2ST1	H3K4me3-only	200	40	15.333	0.719	52	29	73	32	22	55	52	64	64	42	136	105	47	68	86	72
10423	NR_026988	chr1	87595447	87602352	+	LOC339524	Unmarked	1.667	0.417	23	1.302	95	41	91	35	36	70	85	51	81	57	105	51	50	75	13	63
3905	NR_026987	chr1	87597608	87602352	+	LOC339524	Bivalent	61.333	13.142	82.334	4.574	34	43	66	42	34	72	64	74	47	54	100	85	70	74	57	83
24158	NM_006769	chr1	87794150	87814607	+	LMO4	H3K4me3-only	158.333	33.926	9.667	0.707	29	22	84	19	14	32	50	60	63	40	114	134	48	62	103	125
20104	NR_038324	chr1	87819209	87837338	-	LOC100505768	Unmarked	1.667	0.556	13.666	0.788	80	46	75	58	40	65	65	72	60	48	58	57	79	83	25	88
23037	NM_006256	chr1	89149921	89301938	+	PKN2	H3K4me3-only	248.333	46.565	11	0.569	68	17	88	33	20	50	44	54	74	46	89	101	43	56	89	127
15598	NM_001514	chr1	89318320	89357301	-	GTF2B	H3K4me3-only	278.333	39.762	17	0.895	45	34	68	45	47	70	73	62	59	69	95	71	41	78	58	84
20141	NM_001008661	chr1	89401455	89458643	-	CCBL2	H3K4me3-only	176.333	21.161	13.666	0.594	47	42	48	51	22	40	34	92	36	35	55	82	83	71	71	190
20047	NM_019610	chr1	89445138	89458643	-	RBMXL1	H3K4me3-only	176.333	21.161	13.666	0.594	47	42	48	51	22	40	34	92	36	35	55	82	83	71	71	190
22892	NM_018284	chr1	89472359	89488549	-	GBP3	Unmarked	3.333	0.526	11	0.733	117	69	76	56	66	84	79	60	66	54	38	39	69	82	4	40
24003	NM_002053	chr1	89517986	89531043	-	GBP1	Unmarked	1	0.231	10	0.909	101	76	81	50	65	85	75	64	62	60	48	39	80	68	5	40
24122	NM_004120	chr1	89571815	89591842	-	GBP2	Unmarked	3	1.125	9.667	0.806	106	75	81	51	67	83	69	62	65	54	56	38	75	69	7	41
24997	NM_207398	chr1	89597433	89641723	-	GBP7	Unmarked	1	0.188	8.666	0.531	105	88	82	38	80	104	64	69	59	51	37	39	70	73	3	37
25378	NM_052941	chr1	89646830	89664633	-	GBP4	Unmarked	6.333	1	8	0.471	101	57	72	67	46	81	63	63	64	48	56	47	86	68	24	56
23912	NM_052942	chr1	89724633	89738544	-	GBP5	Unmarked	1.666	0.555	10	0.652	83	49	79	73	41	50	69	66	64	44	64	59	96	84	18	60
23722	NR_077244	chr1	89754940	89756045	-	LOC729930	Unmarked	1	0.3	10.333	0.738	124	84	67	59	60	81	75	61	74	43	51	28	76	68	4	44
17691	NM_198460	chr1	89829435	89853719	+	GBP6	Unmarked	1	0.167	15.666	0.839	97	48	69	51	48	106	88	63	59	57	51	49	62	93	8	50
23565	NR_003133	chr1	89873237	89890493	+	GBP1P1	Unmarked	1	0.3	10.333	1.033	102	82	73	52	65	97	71	66	67	46	43	36	76	74	4	45
11615	NM_001134476	chr1	89990396	90063420	+	LRRC8B	H3K4me3-only	311.333	33.358	21	0.875	19	11	76	43	12	26	56	57	61	47	115	129	57	67	105	118
21304	NM_015350	chr1	90024271	90063420	+	LRRC8B	Unmarked	2.667	0.5	12.666	0.717	92	66	96	53	52	67	68	53	82	45	75	45	81	62	8	54
2620	NR_033981	chr1	90090407	90098453	-	FLJ27354	Bivalent	205.333	34.222	143.667	5.256	40	20	70	45	15	17	38	64	64	21	102	120	57	76	96	154
2613	NM_032270	chr1	90098643	90185094	+	LRRC8C	Bivalent	222	37	144.333	5.697	16	14	75	27	14	22	56	53	65	43	145	136	36	66	114	117
8067	NM_001134479	chr1	90286572	90401989	+	LRRC8D	H3K4me3-only	314.333	39.292	29.333	1.205	23	19	65	32	18	36	58	54	41	48	103	142	57	63	108	132
11729	NM_018103	chr1	90287479	90401989	+	LRRC8D	H3K4me3-only	286.667	39.093	21	0.875	33	22	76	19	22	56	75	58	67	57	161	92	28	76	65	92
19536	NR_002830	chr1	90458823	90460525	-	GEMIN8P4	H3K4me3-only	214	71.333	14	0.689	75	40	66	41	38	48	54	39	61	34	112	108	48	57	83	95
19706	NM_182975	chr1	90460677	90472000	+	ZNF326	H3K4me3-only	277.333	75.629	14	0.677	38	29	61	37	32	55	46	63	44	43	93	117	51	69	97	124
262	NM_020063	chr1	91177578	91182794	-	BARHL2	Bivalent	15	4.091	752.667	53.762	31	30	58	39	19	94	44	60	41	37	71	121	67	56	97	134
15385	NM_201269	chr1	91380856	91487812	-	ZNF644	H3K4me3-only	125.333	22.116	17.333	0.881	49	29	67	54	27	63	68	48	59	46	115	94	64	68	64	84
15464	NM_016620	chr1	91380856	91487065	-	ZNF644	H3K4me3-only	282.333	65.159	17.333	0.981	38	22	72	44	26	53	71	51	61	54	154	91	50	73	63	76
19475	NM_001017975	chr1	91726322	91870426	-	HFM1	H3K4me3-only	133	33.25	14.333	1.162	58	43	84	35	51	73	61	40	67	62	122	79	44	46	63	71
11603	NM_003503	chr1	91966403	91991321	+	CDC7	H3K4me3-only	214.667	25.761	21	0.863	56	40	58	42	34	79	57	78	48	51	81	80	58	77	65	95
12742	NM_001134420	chr1	91966664	91991321	+	CDC7	H3K4me3-only	229	31.229	19.667	0.776	41	33	52	34	22	80	66	77	48	54	89	92	49	78	76	108
1917	NR_036634	chr1	92145899	92351836	-	TGFBR3	Bivalent	201.333	35.527	206.333	9.672	36	20	83	26	8	33	54	57	72	39	131	123	49	60	96	112
25476	NM_001195684	chr1	92145899	92371559	-	TGFBR3	Unmarked	2.333	0.467	8	0.511	67	51	66	48	41	101	68	57	60	40	64	74	63	75	40	84
23504	NM_001242810	chr1	92414927	92479985	+	BRDT	Unmarked	1.333	0.222	10.333	0.608	84	28	65	62	39	60	61	62	47	51	76	72	70	82	44	96
26304	NM_001726	chr1	92417708	92479985	+	BRDT	Unmarked	1	0.333	6.666	0.555	116	65	109	34	55	56	75	44	85	52	82	54	68	56	8	40
4053	NM_173567	chr1	92495532	92529093	+	EPHX4	Bivalent	117.333	43.994	77.666	4.161	37	26	57	37	18	47	84	55	62	51	110	112	40	81	83	99
22884	NM_183242	chr1	92545861	92613401	+	BTBD8	H3K4me3-only	184	29.054	11	0.66	63	35	79	35	35	63	69	62	68	53	108	76	45	78	49	81
27642	NM_015237	chr1	92632608	92650280	+	KIAA1107	Unmarked	0.667	0.286	3.333	0.263	94	85	73	47	81	131	68	49	56	45	37	45	68	69	4	47
22705	NM_001012425	chr1	92683572	92711367	+	C1orf146	Unmarked	2	0.462	11.333	0.654	58	24	70	45	24	91	75	63	63	51	83	80	52	87	49	84
24399	NM_053274	chr1	92711954	92764566	-	GLMN	H3K4me3-only	355	42.602	9.333	0.475	37	21	81	37	22	38	63	53	76	42	134	103	40	76	77	99
24427	NM_024813	chr1	92764521	92853732	+	RPAP2	H3K4me3-only	353	40.729	9.333	0.475	43	23	73	44	22	40	40	77	50	37	98	101	68	78	76	129
92	NM_001127215	chr1	92940317	92949356	-	GFI1	Bivalent	58	8.286	955	39.247	24	15	65	40	18	45	61	76	46	53	109	96	56	87	69	139
440	NM_001127216	chr1	92940317	92951628	-	GFI1	Bivalent	42.667	16.004	602.333	32.855	33	15	77	29	14	42	55	57	63	42	155	113	44	69	86	105
641	NM_005263	chr1	92940317	92952433	-	GFI1	Bivalent	39.667	9.917	480.333	28.255	42	41	62	34	38	67	49	66	42	50	111	95	57	62	76	107
21793	NM_005665	chr1	92974252	93257961	-	EVI5	Unmarked	8.333	1.47	12.333	0.649	145	75	79	49	71	96	63	53	65	53	51	31	67	59	8	34
12333	NM_000969	chr1	93297593	93307481	+	RPL5	H3K4me3-only	303.333	34.999	20	0.857	72	26	79	40	29	52	69	53	63	52	110	92	53	73	58	78
25719	NR_000006	chr1	93302845	93302940	+	SNORD21	Unmarked	5	1.875	7.666	0.46	105	89	66	47	86	130	86	37	65	60	50	34	52	60	6	26
24690	NR_002444	chr1	93306275	93306408	+	SNORA66	Unmarked	3.667	0.524	9	0.482	105	80	67	52	70	114	90	48	65	66	41	33	64	62	7	35
6796	NM_001252270	chr1	93307716	93427079	-	FAM69A	H3K4me3-only	189.667	63.222	36.333	2.018	16	12	65	30	9	14	43	51	51	31	133	153	47	61	127	156
25399	NM_001252271	chr1	93307716	93342707	-	FAM69A	Unmarked	1.667	0.417	8	0.444	106	81	62	47	72	122	76	72	51	58	29	35	67	80	7	34
16558	NM_001164391	chr1	93544791	93604638	+	MTF2	H3K4me3-only	290.333	31.108	16.333	0.79	85	37	79	44	31	59	71	50	78	62	103	67	52	53	56	72
18897	NM_016040	chr1	93615298	93646246	-	TMED5	H3K4me3-only	288	39.275	14.666	0.667	43	26	73	53	19	57	44	56	70	31	92	103	63	61	87	121
18710	NM_206886	chr1	93646280	93744287	+	CCDC18	H3K4me3-only	278	36.259	14.667	0.667	55	26	54	32	19	47	63	74	52	54	113	100	42	76	88	104
16946	NR_034089	chr1	93775665	93811368	-	LOC100131564	H3K4me3-only	269.333	44.889	16	0.923	52	27	67	43	26	47	57	58	60	39	96	105	51	75	80	116
17221	NM_001938	chr1	93811477	93828148	+	DR1	H3K4me3-only	287.333	39.184	15.999	0.923	30	23	72	38	23	42	52	64	53	43	120	113	57	73	85	111
11429	NM_017737	chr1	93913687	94020218	+	FNBP1L	H3K4me3-only	307	46.048	21.333	0.985	34	15	74	35	16	37	47	69	64	46	131	103	44	72	92	120
5013	NM_001261409	chr1	94027342	94146926	-	BCAR3	H3K4me3-only	224.333	48.068	56.667	2.656	28	14	75	27	12	35	59	52	69	44	134	124	35	65	103	123
5277	NM_003567	chr1	94027342	94147394	-	BCAR3	H3K4me3-only	189.333	43.696	52.334	2.532	42	27	74	33	18	46	61	52	68	46	128	111	48	58	90	97
8626	NM_001261408	chr1	94027342	94312706	-	BCAR3	H3K4me3-only	298.333	49.722	27.333	1.39	23	16	59	38	12	33	52	62	48	51	92	136	53	59	123	142
13137	NM_001261410	chr1	94027342	94079702	-	BCAR3	Unmarked	1	0.188	19.333	0.892	78	36	91	44	39	67	82	56	67	55	88	66	64	87	15	64
22320	NR_034091	chr1	94057524	94065587	+	LOC100129046	Unmarked	4.667	0.933	11.666	0.583	62	48	64	46	30	69	89	71	51	54	74	66	77	89	18	91
8248	NR_030621	chr1	94312387	94312467	+	MIR760	H3K4me3-only	285	71.25	28.667	1.365	37	15	55	47	12	21	43	51	50	32	134	147	55	59	130	111
20703	NM_014597	chr1	94335013	94344762	-	DNTTIP2	H3K4me3-only	343.333	49.048	13.333	0.606	89	41	67	53	49	84	46	65	54	45	73	73	58	73	59	70
8095	NM_002061	chr1	94352589	94375012	-	GCLM	H3K4me3-only	191	33.704	29.333	1.397	37	9	64	38	13	27	44	54	46	33	106	151	51	69	122	135
7085	NM_000350	chr1	94458393	94586705	-	ABCA4	Unmarked	2.333	0.467	34.334	1.431	73	42	78	44	40	65	78	64	58	61	86	58	66	79	21	86
1820	NM_004815	chr1	94634462	94703307	-	ARHGAP29	Bivalent	147.333	29.467	218	12.577	57	28	71	21	28	25	76	47	54	62	136	123	39	61	92	79
5352	NM_002858	chr1	94883932	94984219	+	ABCD3	H3K4me3-only	309	51.5	51.333	2.525	23	11	62	36	17	28	57	71	43	58	102	132	49	75	115	120
3733	NM_001178096	chr1	94994731	95007413	-	F3	Bivalent	210.667	90.299	88.333	5.521	29	17	58	42	14	29	50	56	51	36	140	118	52	66	98	143
6062	NM_001258342	chr1	95285897	95360803	+	SLC44A3	H3K4me3-only	201.667	22.407	42.667	1.778	43	19	75	42	24	34	49	53	50	42	112	117	63	65	84	127
6044	NM_152369	chr1	95286099	95360803	+	SLC44A3	H3K4me3-only	160	20	43	1.743	42	19	75	35	22	55	45	55	52	42	119	110	55	62	83	128
15450	NM_001839	chr1	95362506	95392735	-	CNN3	H3K4me3-only	246	35.143	17.333	0.765	22	11	74	22	6	22	50	52	58	41	169	133	43	56	107	133
14400	NR_033998	chr1	95393583	95428826	+	LOC729970	H3K4me3-only	126	18	18	1.019	66	53	75	45	37	75	72	66	72	41	64	63	64	82	28	96
14175	NM_144988	chr1	95448278	95538507	-	ALG14	H3K4me3-only	270	30	18.333	0.873	68	40	70	54	52	89	70	55	56	68	64	71	56	69	55	62
25202	NM_001199679	chr1	95558072	95663161	+	TMEM56	Unmarked	0.333	0.2	8.333	0.833	66	34	79	75	48	60	74	71	55	62	53	55	85	97	20	65
7760	NM_152487	chr1	95582893	95663161	+	TMEM56	H3K4me3-only	221.333	41.503	30.667	1.373	34	16	66	36	18	53	54	47	53	39	118	127	47	64	99	128
7770	NM_001199691	chr1	95583478	95710509	+	TMEM56-RWDD3	H3K4me3-only	208.333	52.083	30.667	1.673	41	23	58	33	24	50	54	61	42	47	110	116	48	69	92	131
12961	NR_103484	chr1	95699710	95712781	+	RWDD3	H3K4me3-only	195.333	41.854	19.333	1.137	29	11	70	37	14	36	58	63	52	47	118	113	52	76	84	139
25480	NR_033966	chr1	95940292	95944912	+	FLJ31662	Unmarked	1	0.176	8	0.48	92	69	68	43	69	127	80	65	55	54	44	40	56	91	2	44
16423	NM_021190	chr1	97187174	97280605	+	PTBP2	H3K4me3-only	167	38.541	16.333	0.961	48	24	74	31	25	62	69	53	59	60	113	100	45	62	76	98
25310	NR_046590	chr1	97561478	97788511	+	DPYD-AS1	Unmarked	1.333	0.286	8.333	0.446	127	108	59	64	104	120	61	42	59	36	31	28	67	64	3	26
9649	NM_001160301	chr1	98185313	98386615	-	DPYD	H3K4me3-only	197.333	45.542	24.333	1.622	33	18	70	35	20	54	79	58	68	49	116	101	35	90	70	103
1581	NR_046105	chr1	98453555	98515249	-	MIR137HG	Bivalent	25	8.333	249.667	13.87	70	67	71	60	53	107	67	60	68	46	44	52	77	67	28	62
744	NR_039604	chr1	98510798	98510907	-	MIR2682	Bivalent	72.667	8.72	435.334	18.928	47	21	72	44	9	63	67	64	73	50	121	86	55	68	70	89
742	NR_029679	chr1	98511625	98511727	-	MIR137	Bivalent	50.667	7.238	438.333	19.058	44	32	84	40	32	72	63	55	61	58	125	89	62	61	61	60
25816	NR_046088	chr1	98676266	98738214	+	LOC729987	Unmarked	4.333	1.083	7.666	0.657	127	105	67	39	80	98	82	44	73	47	41	40	59	54	10	33
9416	NM_015976	chr1	99127235	99226056	+	SNX7	H3K4me3-only	197	59.106	25	1.667	33	16	58	38	12	50	56	62	51	42	141	115	49	71	94	111
4992	NM_001010861	chr1	99355800	99470449	-	LPPR5	H3K4me3-only	198.667	37.252	57	2.803	16	18	43	36	15	33	54	71	38	40	112	132	44	83	112	152
5355	NR_033940	chr1	99469831	99614408	+	LOC100129620	H3K4me3-only	237.667	50.925	51.333	2.75	49	29	71	48	24	43	50	61	60	41	111	93	64	65	73	117
3765	NM_014839	chr1	99729847	99775138	+	LPPR4	Bivalent	123	19.422	87	6.214	41	38	98	32	28	45	66	61	73	44	124	96	68	73	49	63
14841	NM_017734	chr1	100111430	100160097	+	PALMD	Unmarked	5.667	1.417	17.666	1.104	98	45	73	56	41	58	80	70	53	57	62	60	80	90	17	59
24381	NR_037516	chr1	100154610	100178513	+	MIR548AA1	Unmarked	2.667	0.889	9.333	0.609	136	83	88	62	58	60	55	56	79	44	44	30	95	43	10	56
25928	NR_030382	chr1	100154610	100178513	-	MIR548D1	Unmarked	1.333	0.5	7.333	0.524	93	97	55	55	91	116	94	39	55	63	42	35	61	63	4	36
24597	NM_001013660	chr1	100174258	100231349	-	FRRS1	Unmarked	6.667	2	9.333	0.518	52	56	56	39	65	142	66	65	34	60	65	63	53	80	34	69
18478	NM_000642	chr1	100315639	100389579	+	AGL	H3K4me3-only	232.667	41.056	15	0.882	51	24	67	47	30	42	61	65	46	49	84	103	62	83	70	115
20501	NM_000643	chr1	100316044	100389579	+	AGL	H3K4me3-only	249	33.956	13.333	0.769	42	41	60	34	43	82	61	79	44	51	77	88	48	91	63	95
22062	NM_000646	chr1	100316530	100389579	+	AGL	H3K4me3-only	126.667	29.233	12	0.692	97	86	55	36	76	140	69	74	52	51	42	38	49	82	16	36
26343	NM_000645	chr1	100326765	100389579	+	AGL	Unmarked	1.666	0.333	6.666	0.488	92	77	81	48	73	106	69	60	62	63	49	35	71	61	10	42
15091	NM_001271684	chr1	100435344	100492534	+	SLC35A3	H3K4me3-only	173.333	25.999	17.333	0.963	38	19	89	41	18	56	67	55	65	53	128	96	66	67	59	82
16939	NM_001271685	chr1	100435991	100492534	+	SLC35A3	H3K4me3-only	248	32.351	16	0.889	63	32	83	44	35	55	78	40	81	63	130	81	43	58	63	50
17684	NM_033055	chr1	100503788	100548929	+	HIAT1	H3K4me3-only	403.333	109.99	15.666	0.839	36	24	58	35	21	37	55	60	52	44	110	123	43	68	107	126
20635	NM_194292	chr1	100549101	100598511	-	SASS6	H3K4me3-only	347.333	45.302	13.333	0.606	65	31	77	54	32	53	45	69	59	51	92	70	70	65	58	108
19634	NM_019083	chr1	100598705	100616054	+	TRMT13	H3K4me3-only	308	51.333	14	0.609	59	39	67	42	40	85	73	55	68	56	93	71	40	73	55	83
25097	NM_001256387	chr1	100614003	100643829	-	LRRC39	Unmarked	1.333	0.5	8.666	0.839	96	91	62	40	77	137	81	62	57	57	40	34	59	71	6	29
21159	NM_001918	chr1	100652477	100715409	-	DBT	H3K4me3-only	297	34.268	12.667	0.543	50	47	75	45	49	76	71	65	57	63	81	64	60	75	39	82
14492	NM_003729	chr1	100731713	100758325	+	RTCA	H3K4me3-only	299.333	39.042	18	0.806	55	35	70	54	31	56	56	68	56	40	92	88	72	80	58	88
24555	NR_030279	chr1	100746796	100746864	+	MIR553	Unmarked	3	0.9	9.333	0.778	81	77	72	44	67	113	83	65	63	62	40	37	63	76	8	48
15260	NM_003672	chr1	100818022	100985833	+	CDC14A	H3K4me3-only	264	36.002	17.333	0.684	48	17	95	28	16	32	71	43	83	50	123	111	41	62	79	100
730	NM_022049	chr1	101003727	101007583	+	GPR88	H3K27me3-only	4.667	1.273	444.333	27.205	85	58	71	42	41	79	88	74	75	42	59	54	54	104	12	61
24119	NR_038914	chr1	101092605	101112560	-	LOC100128787	Unmarked	3	0.643	9.667	0.592	52	48	75	49	33	58	84	76	55	54	78	61	84	92	10	90
18395	NM_080682	chr1	101185195	101204601	+	VCAM1	Unmarked	4.667	0.933	15	0.789	105	70	71	41	65	138	64	66	56	52	43	36	61	73	9	49
23339	NM_001261440	chr1	101337927	101360735	-	EXTL2	H3K4me3-only	271.333	33.917	10.666	0.432	82	37	70	46	33	88	61	57	64	49	91	73	56	66	54	72
22492	NM_001144884	chr1	101361631	101447311	+	SLC30A7	H3K4me3-only	328.667	37.922	11.666	0.493	46	33	69	42	22	46	61	72	55	61	104	79	67	62	64	116
22363	NM_133496	chr1	101361633	101447311	+	SLC30A7	H3K4me3-only	328	37.845	11.666	0.493	46	33	69	43	23	46	61	71	55	60	104	79	67	62	64	116
25849	NM_015958	chr1	101455179	101491362	-	DPH5	H3K4me3-only	343	85.75	7.333	0.595	57	27	76	46	39	73	65	75	54	61	83	71	56	91	45	80
2795	NM_001400	chr1	101702304	101707076	+	S1PR1	Bivalent	168	33.6	132.667	4.854	40	22	73	36	20	90	45	79	57	41	124	88	53	81	69	81
17067	NM_058170	chr1	102268126	102462790	-	OLFM3	H3K4me3-only	41	6.474	16	0.857	81	74	64	51	68	62	71	59	52	38	57	73	69	86	28	66
27547	NR_033424	chr1	102337566	102360299	+	DNAJA1P5	Unmarked	1	0.5	4	0.316	140	107	92	44	97	100	71	30	84	56	38	26	62	35	3	14
7994	NM_001190709	chr1	103342022	103574052	-	COL11A1	H3K4me3-only	230.667	43.253	29.667	1.978	52	26	86	35	19	57	67	64	76	52	133	71	52	71	46	92
23144	NM_017619	chr1	104068577	104097859	+	RNPC3	H3K4me3-only	278.667	83.608	11	0.717	44	31	56	27	19	76	68	65	63	51	66	101	32	71	91	138
26712	NM_020978	chr1	104097265	104122156	+	AMY2B	Unmarked	1.333	0.364	6	0.409	116	80	67	50	88	126	76	42	64	58	45	26	44	69	5	43
24309	NR_024438	chr1	104112025	104114008	+	ACTG1P4	Unmarked	2	1	9.666	0.604	67	83	61	75	58	46	94	46	62	61	70	41	99	54	9	73
27169	NM_000699	chr1	104159998	104168400	+	AMY2A	Unmarked	0.333	1	5	0.714	87	85	65	40	76	137	77	61	59	60	53	32	55	70	8	34
26700	NR_033990	chr1	104615644	104619693	+	LOC100129138	Unmarked	0.667	0.222	6	0.692	106	57	82	51	61	84	58	42	63	35	50	71	67	69	29	74
10721	NM_018137	chr1	107599266	107601916	+	PRMT6	H3K4me3-only	256.667	45.292	22.333	1.063	92	23	92	54	23	19	52	34	88	44	124	94	59	42	82	77
5562	NM_001113226	chr1	107682628	108024475	+	NTNG1	H3K4me3-only	147.333	25.998	48.666	2.561	59	36	87	27	33	85	69	57	72	52	113	83	45	71	50	60
5553	NM_014917	chr1	107682744	108024475	+	NTNG1	H3K4me3-only	177.333	28.001	48.667	2.517	59	36	85	31	30	72	71	57	74	52	118	85	48	70	55	56
4344	NM_006113	chr1	108113781	108507545	-	VAV3	Bivalent	178.667	44.667	70.333	3.459	31	20	56	33	9	32	57	47	52	32	113	150	48	61	121	137
24244	NM_001079874	chr1	108113781	108231126	-	VAV3	Unmarked	2.333	0.5	9.666	0.644	155	70	70	58	83	113	68	34	52	62	36	35	63	52	11	37
4121	NR_046653	chr1	108507064	108537229	+	VAV3-AS1	Bivalent	183.667	34.44	75.666	3.914	63	33	74	53	23	54	56	63	60	37	90	95	77	73	62	86
10341	NM_013386	chr1	108677343	108742980	-	SLC25A24	H3K4me3-only	262.333	32.792	23	1.19	28	20	65	46	11	38	60	56	61	29	102	128	60	78	93	124
24595	NM_213651	chr1	108677343	108735431	-	SLC25A24	Unmarked	2	0.375	9.333	0.609	58	46	74	51	40	77	72	58	67	51	90	64	64	74	36	77
27995	NM_001143989	chr1	108765962	108786703	-	NBPF4	Unmarked	0	10	0.333	10	91	62	81	57	52	76	72	65	70	50	45	46	78	78	13	63
28117	NM_001143988	chr1	108992903	109013260	+	NBPF6	Unmarked	0	0	0	0	91	62	82	58	53	75	70	65	70	50	45	45	79	77	13	64
16694	NM_001010883	chr1	109102970	109181949	+	FAM102B	H3K4me3-only	152	65.152	16.333	0.942	37	20	63	19	13	48	54	68	48	32	106	141	40	83	105	122
4293	NM_144584	chr1	109190909	109204148	-	HENMT1	Bivalent	70	10.499	71.667	3.909	56	33	69	47	35	64	46	53	57	41	106	107	57	59	91	78
4421	NM_001102592	chr1	109190909	109203744	-	HENMT1	Bivalent	65.333	15.078	68.667	3.552	28	17	68	42	20	74	53	53	59	44	105	127	48	65	109	87
14479	NM_018061	chr1	109234931	109244422	+	PRPF38B	H3K4me3-only	393.667	62.161	18	0.947	52	33	74	50	22	38	54	75	65	38	77	91	71	80	66	113
14593	NR_037185	chr1	109234934	109244422	+	PRPF38B	H3K4me3-only	393.667	62.161	18	0.947	53	33	75	50	22	38	54	75	65	39	77	91	70	80	66	111
26051	NM_001144937	chr1	109255555	109285367	+	FNDC7	Unmarked	2	0.316	7	0.368	112	70	64	50	60	125	75	55	63	54	53	33	61	66	11	47
10422	NM_007269	chr1	109289284	109352148	+	STXBP3	H3K4me3-only	190.333	28.549	23	1.062	35	25	61	37	20	60	75	65	58	62	117	94	45	73	78	94
14722	NR_049760	chr1	109358519	109400864	-	AKNAD1	Unmarked	1.333	0.333	17.667	1.152	101	75	75	52	63	100	92	46	68	64	34	44	71	62	8	44
18357	NM_152763	chr1	109358519	109399726	-	AKNAD1	Unmarked	2.667	0.616	15	0.957	71	65	69	41	40	98	100	79	59	72	48	43	75	82	5	52
17669	NR_049777	chr1	109399838	109400962	+	SPATA42	Unmarked	2	0.5	15.666	0.979	106	65	73	78	44	77	75	56	74	43	52	36	98	67	5	50
7014	NM_013296	chr1	109419602	109473044	+	GPSM2	H3K4me3-only	165	123.781	35	2.763	36	17	73	41	16	51	64	51	74	52	131	101	41	63	89	99
10017	NM_015127	chr1	109472129	109506121	-	CLCC1	H3K4me3-only	167.667	31.44	23.667	1.365	69	37	73	39	30	43	68	45	67	50	97	110	52	56	86	77
21867	NM_001278202	chr1	109472129	109493070	-	CLCC1	Unmarked	1.666	0.416	12.333	0.627	110	98	64	43	86	106	88	45	59	56	39	38	61	64	1	41
24333	NM_001142550	chr1	109512837	109584850	-	WDR47	H3K4me3-only	121.667	45.637	9.666	0.763	47	25	56	47	22	43	53	56	58	38	102	102	48	68	89	145
23693	NM_005645	chr1	109606997	109618624	-	TAF13	H3K4me3-only	214.667	42.933	10.333	0.705	101	51	80	53	43	82	59	62	72	51	57	56	69	63	40	60
17545	NM_020141	chr1	109633402	109639554	+	TMEM167B	H3K4me3-only	255	26.378	15.666	0.644	47	27	66	63	43	69	40	69	53	41	71	79	59	85	67	120
17142	NR_003023	chr1	109642814	109643234	+	SCARNA2	H3K4me3-only	262.667	31.521	16	0.906	61	33	71	40	27	36	78	50	72	59	101	99	44	63	81	84
1257	NM_001122961	chr1	109648572	109656479	-	C1orf194	Bivalent	100.333	13.086	305.667	9.552	35	21	73	41	19	37	55	98	51	46	87	99	65	106	68	98
1256	NM_001267048	chr1	109656584	109749403	+	KIAA1324	Bivalent	109.333	14.91	306	9.766	38	25	78	49	20	47	66	54	71	41	109	104	60	74	72	91
10803	NR_049774	chr1	109729170	109749403	+	KIAA1324	Unmarked	1.667	0.208	22.333	0.848	58	43	92	40	33	67	88	63	68	53	80	72	73	88	13	68
8752	NM_001267049	chr1	109730600	109749403	+	KIAA1324	Unmarked	2.333	0.467	27	1.125	63	53	67	66	33	49	76	75	51	46	68	56	102	85	10	99
14638	NR_034072	chr1	109756514	109760113	+	SARS	H3K4me3-only	287.667	41.095	18	0.771	52	32	87	47	30	40	55	61	71	47	97	84	64	67	61	104
3694	NM_001408	chr1	109792640	109818378	+	CELSR2	Bivalent	83.333	20.833	90	3.857	10	15	64	35	8	13	56	37	53	30	177	148	53	56	111	133
14565	NM_001032291	chr1	109822175	109825790	-	PSRC1	H3K4me3-only	272	37.093	18	0.75	46	30	81	37	26	37	71	54	73	47	120	94	49	74	63	97
17704	NM_001010985	chr1	109834986	109849663	-	MYBPHL	Unmarked	2.667	0.421	15.666	0.746	46	38	86	37	30	51	87	59	70	53	108	68	60	85	19	102
13535	NM_002959	chr1	109852187	109940563	-	SORT1	H3K4me3-only	171.667	46.814	19	0.905	27	17	67	28	11	24	46	48	58	38	146	142	42	50	126	129
18985	NM_001205228	chr1	109852187	109935979	-	SORT1	Unmarked	3.667	0.5	14.666	0.786	74	71	56	51	72	107	88	68	47	60	40	46	59	97	9	54
17576	NM_001199774	chr1	109941652	109969108	-	PSMA5	H3K4me3-only	353	36.516	15.666	0.758	51	22	67	56	32	32	60	62	61	56	112	80	52	76	70	110
18153	NM_002790	chr1	109941652	109969070	-	PSMA5	H3K4me3-only	360.333	31.795	15.333	0.767	44	23	67	53	33	35	62	64	60	59	111	81	50	77	71	109
18161	NM_001199773	chr1	109941652	109969081	-	PSMA5	H3K4me3-only	358.333	32.576	15.333	0.767	46	22	66	54	32	35	62	64	60	58	112	81	50	78	71	108
2227	NM_001040709	chr1	110009099	110024764	+	SYPL2	Bivalent	99.333	33.111	173.667	11.841	55	27	68	46	27	46	50	56	59	41	86	107	54	65	89	123
8483	NM_153340	chr1	110026560	110035420	+	ATXN7L2	H3K4me3-only	195.667	26.683	28	1.183	30	20	67	37	21	35	65	56	54	42	127	118	49	79	82	117
12214	NM_001134402	chr1	110036657	110043063	+	CYB561D1	H3K4me3-only	157	16.241	20.333	0.763	40	29	76	49	20	62	71	52	71	48	131	78	63	67	50	92
12109	NM_182580	chr1	110036700	110043063	+	CYB561D1	H3K4me3-only	162.667	16.827	20.333	0.772	42	29	79	47	19	56	73	49	75	49	137	80	61	64	51	88
3551	NM_020703	chr1	110049445	110052336	-	AMIGO1	Bivalent	160	43.644	96	4.056	32	22	68	47	14	31	55	46	68	40	116	114	54	53	100	139
11097	NM_031936	chr1	110082493	110088455	+	GPR61	Unmarked	9.333	1.333	22	0.75	39	42	85	42	25	56	82	67	60	39	99	83	84	93	15	88
19640	NM_006496	chr1	110091185	110138454	+	GNAI3	H3K4me3-only	339.667	101.91	14	0.636	56	33	83	35	29	48	65	53	79	61	126	81	43	53	73	81
25223	NR_029583	chr1	110141514	110141589	+	MIR197	Unmarked	2.667	0.32	8.333	0.463	89	73	57	57	66	121	78	65	45	60	45	38	75	77	8	45
14877	NM_005272	chr1	110145888	110155705	-	GNAT2	Unmarked	3	0.818	17.666	0.946	89	59	106	47	60	52	60	57	81	38	75	53	71	80	7	64
14015	NM_139156	chr1	110162434	110174677	+	AMPD2	H3K4me3-only	175.333	23.91	18.333	0.873	51	27	79	53	27	47	72	51	70	57	119	75	62	66	51	92
10566	NM_004037	chr1	110163202	110174677	+	AMPD2	H3K4me3-only	233	27.961	22.666	0.883	24	22	86	35	16	54	79	67	70	50	129	74	57	90	28	118
17625	NM_001257361	chr1	110166609	110174677	+	AMPD2	Unmarked	2.667	0.444	15.666	0.783	28	18	86	35	26	46	79	66	49	42	119	91	64	112	17	121
22665	NM_203404	chr1	110168048	110174677	+	AMPD2	Unmarked	1.333	0.267	11.333	0.515	12	26	75	46	20	33	78	77	55	48	93	86	72	101	36	141
5325	NM_000850	chr1	110198697	110204331	+	GSTM4	H3K4me3-only	191	19.1	51.667	2.153	39	25	83	54	22	31	78	64	76	57	108	82	63	83	54	80
12312	NM_000848	chr1	110210643	110217908	+	GSTM2	H3K4me3-only	38.667	7.251	20	1.463	36	40	65	42	32	61	77	76	57	57	110	72	58	87	45	84
9115	NM_000561	chr1	110230417	110236367	+	GSTM1	H3K4me3-only	57.666	12.356	26	1.814	35	20	81	45	24	30	71	56	70	47	145	93	52	84	58	88
8985	NM_000851	chr1	110254863	110260890	+	GSTM5	H3K4me3-only	15	5.626	26.333	2.394	32	24	80	41	23	31	77	57	70	50	152	89	52	82	52	87
2376	NR_024537	chr1	110276553	110283660	-	GSTM3	Bivalent	39.333	9.078	162	10.8	78	59	82	43	53	67	73	64	72	53	88	45	59	78	15	70
13945	NM_133181	chr1	110292701	110306644	-	EPS8L3	Unmarked	2	0.462	18.333	0.948	43	22	99	55	18	16	65	56	53	40	126	87	105	77	15	122
1605	NM_000757	chr1	110453232	110473616	+	CSF1	Bivalent	110.333	22.067	245	11.308	37	17	81	28	12	32	79	50	64	54	146	115	50	70	73	91
8356	NM_001242673	chr1	110527386	110566364	+	AHCYL1	H3K4me3-only	179.333	21.521	28.333	1.349	39	15	71	38	10	32	70	60	61	52	132	114	53	74	85	93
24393	NM_001242674	chr1	110543548	110566364	+	AHCYL1	Unmarked	1.667	0.715	9.333	0.549	99	66	64	44	65	140	75	57	40	59	44	47	69	72	7	51
21124	NM_001242675	chr1	110546569	110566364	+	AHCYL1	Unmarked	9.333	1.647	13	0.591	76	51	97	44	58	91	91	48	86	75	81	37	47	72	10	35
16603	NM_001270768	chr1	110574198	110597263	+	STRIP1	Unmarked	4.333	1.3	16.333	0.98	74	68	71	34	52	123	78	74	52	53	59	50	68	83	7	53
15200	NR_073071	chr1	110577222	110597263	+	STRIP1	H3K4me3-only	190.667	38.133	17.333	1.083	72	38	74	54	36	48	62	47	65	42	104	88	65	65	59	80
281	NM_006492	chr1	110602996	110613322	-	ALX3	Bivalent	40.333	7.117	732.334	32.792	28	17	58	39	21	35	51	55	45	26	114	123	47	84	85	171
7672	NM_203412	chr1	110655061	110656569	+	UBL4B	Unmarked	2	0.24	31.333	1.306	56	41	89	42	27	38	86	70	62	46	57	81	83	96	15	110
665	NM_001010898	chr1	110693131	110744823	+	SLC6A17	Bivalent	55	6.6	467	20.911	41	19	88	32	12	22	58	52	72	43	116	119	55	59	89	122
2114	NM_004978	chr1	110753335	110776674	+	KCNC4	Bivalent	148.667	63.724	185.667	8.072	12	11	59	19	7	22	60	41	46	39	108	169	36	57	136	177
15720	NR_036595	chr1	110828998	110881793	-	LOC440600	H3K4me3-only	252	32.872	17	0.729	49	31	53	52	33	84	60	82	47	61	64	75	56	82	71	99
13194	NM_022768	chr1	110881944	110889303	+	RBM15	H3K4me3-only	271	47.821	19.333	0.773	74	35	85	50	38	48	57	49	79	56	105	79	54	53	71	66
22582	NM_001201547	chr1	110905472	110933704	-	SLC16A4	Unmarked	6	1.385	11.333	0.723	98	67	66	48	53	100	69	67	59	48	52	41	69	74	13	75
12166	NM_006402	chr1	110943876	110950546	-	LAMTOR5	H3K4me3-only	269	42.476	20.333	1.326	64	28	69	57	38	58	61	67	64	67	81	63	51	71	65	95
11931	NR_102697	chr1	110950430	110958896	+	LAMTOR5-AS1	H3K4me3-only	300.333	56.316	20.666	1.348	41	23	73	66	29	59	52	63	69	58	105	71	63	63	74	90
12531	NM_032414	chr1	110993787	110999976	+	PROK1	Unmarked	2	0.667	20	1.579	72	70	89	32	47	87	94	55	78	65	70	51	66	60	12	51
7779	NR_003599	chr1	111023387	111033891	+	CYMP	Unmarked	2.333	0.7	30.667	1.736	45	53	87	38	39	52	92	79	61	71	97	53	79	85	6	62
7104	NM_005549	chr1	111059838	111061797	-	KCNA10	Unmarked	1	0.3	34.333	1.609	93	80	65	41	51	102	81	62	65	48	61	41	71	66	8	64
9092	NM_001204269	chr1	111136201	111174096	-	KCNA2	Unmarked	3	0.75	26	1.472	78	42	93	50	29	54	85	56	77	51	75	63	79	77	13	77
661	NM_004974	chr1	111145775	111148975	-	KCNA2	Bivalent	76	20.731	468.667	22.317	31	19	98	19	15	41	74	53	75	42	140	110	45	81	56	100
770	NM_002232	chr1	111214309	111217655	-	KCNA3	Bivalent	123	26.355	427	15.622	22	10	62	39	9	14	54	32	61	20	160	154	41	65	119	137
24910	NM_001040033	chr1	111413820	111442558	+	CD53	Unmarked	3	1.125	8.667	0.578	86	66	107	48	53	60	83	40	103	53	96	38	65	57	4	40
23031	NM_000560	chr1	111415721	111442558	+	CD53	Unmarked	2.667	0.471	11	0.635	89	60	71	49	53	88	69	81	62	50	61	42	65	93	13	53
24026	NM_001006945	chr1	111489811	111506566	-	LRIF1	H3K4me3-only	141	30.212	10	0.612	52	29	73	45	25	69	59	66	66	53	79	88	56	69	75	95
24475	NM_178454	chr1	111659953	111682838	-	DRAM2	H3K4me3-only	275.667	39.381	9.333	0.412	28	16	69	44	24	32	42	69	41	41	114	114	65	77	85	138
25032	NM_001007794	chr1	111682248	111727724	+	CEPT1	H3K4me3-only	240	31.303	8.666	0.347	79	39	83	56	40	62	55	47	75	34	77	77	63	69	48	95
24568	NM_006090	chr1	111682832	111727724	+	CEPT1	H3K4me3-only	274.333	41.148	9.333	0.412	32	16	77	42	24	29	65	41	68	44	138	114	42	71	84	112
1639	NM_001271833	chr1	111728590	111747160	-	DENND2D	Bivalent	24.667	3.895	241	13.642	42	22	91	34	17	39	57	38	81	46	176	97	48	44	77	90
10158	NM_024901	chr1	111728590	111743325	-	DENND2D	Unmarked	0.667	0.286	23.333	1.795	44	37	76	39	34	86	85	81	58	60	86	61	60	104	17	71
9495	NM_001025197	chr1	111770280	111786062	+	CHI3L2	Unmarked	1.333	0.222	25	1.531	75	44	104	40	32	88	79	59	82	57	84	52	73	70	8	52
15138	NM_001025199	chr1	111772332	111786062	+	CHI3L2	Unmarked	0.333	0.167	17.333	1.3	79	61	62	55	50	76	76	67	54	51	63	59	75	81	25	65
21220	NR_003928	chr1	111823145	111828730	+	CHIAP2	Unmarked	2	0.6	12.667	1.056	97	59	71	60	62	84	68	71	59	47	56	38	70	95	4	58
24247	NM_001258005	chr1	111833473	111863188	+	CHIA	Unmarked	1	0.375	9.666	0.659	96	95	46	56	78	95	85	62	42	63	36	35	77	66	10	57
11677	NM_181643	chr1	111889194	111895639	+	PIFO	H3K4me3-only	165.333	17.713	21	0.94	47	23	71	48	34	66	57	66	51	45	89	80	57	89	48	128
15541	NR_029429	chr1	111927140	111932473	-	PGCP1	Unmarked	1.333	0.333	17	1	84	48	86	42	42	78	98	64	74	78	73	36	60	78	4	54
10933	NM_002557	chr1	111956936	111970399	-	OVGP1	Unmarked	1	0.333	22	1.119	67	58	78	41	49	72	105	65	58	82	69	48	70	80	5	52
22154	NM_024102	chr1	111982511	111991830	-	WDR77	H3K4me3-only	339.667	48.524	12	0.529	43	30	72	40	25	44	60	67	70	48	85	84	47	73	71	140
22071	NM_001688	chr1	111991742	112004525	+	ATP5F1	H3K4me3-only	316.333	55.82	12	0.537	43	31	69	50	26	43	44	75	62	38	130	83	62	77	69	97
22116	NM_174896	chr1	112016603	112021134	+	C1orf162	Unmarked	1.333	0.444	12	0.837	99	70	66	47	62	94	82	48	64	62	66	53	57	59	31	39
23501	NM_001081976	chr1	112025969	112106597	-	ADORA3	Unmarked	2.667	0.889	10.333	0.646	83	75	82	46	63	80	80	56	67	56	76	44	72	69	5	45
15610	NM_000677	chr1	112042050	112046743	-	ADORA3	Unmarked	1.667	0.5	17	0.981	56	45	75	29	29	87	100	80	59	58	70	71	62	105	13	60
25621	NR_034126	chr1	112141628	112150940	-	LOC100129269	Unmarked	0.667	10	7.667	1	16	15	76	19	8	19	72	67	63	58	118	108	40	74	81	165
21438	NM_001010935	chr1	112162404	112256101	+	RAP1A	H3K4me3-only	153	28.689	12.666	0.594	31	19	74	36	19	48	51	65	62	46	132	97	48	69	80	122
7362	NM_019099	chr1	112264685	112282046	-	FAM212B	H3K4me3-only	166.667	27.778	32.667	1.441	39	17	83	45	13	33	60	52	79	38	132	100	53	70	75	110
11655	NM_198926	chr1	112264685	112298419	-	FAM212B	H3K4me3-only	325.333	30.499	21	0.759	40	23	64	42	16	32	62	60	56	42	88	117	57	73	89	138
6789	NR_038952	chr1	112282462	112290420	+	LOC100506343	H3K4me3-only	104.333	14.228	36.333	1.677	50	20	86	52	23	34	49	56	65	44	127	96	70	65	70	92
11871	NM_007204	chr1	112298189	112310199	+	DDX20	H3K4me3-only	335.667	27.972	20.667	0.729	41	38	87	44	25	47	58	56	70	42	112	102	73	59	70	75
691	NM_172198	chr1	112318453	112531777	-	KCND3	Bivalent	32	8.726	457.333	23.254	39	19	64	34	15	42	69	57	63	48	142	113	39	75	90	90
799	NM_001270945	chr1	112533189	112541463	+	LOC643355	Bivalent	84.667	13.369	418	21.255	17	12	86	39	17	14	82	47	74	79	145	98	46	56	83	104
16412	NM_018704	chr1	112938799	113003786	+	CTTNBP2NL	H3K4me3-only	285.333	42.798	16.333	0.803	65	31	79	43	19	44	40	67	64	28	109	84	70	67	57	132
20873	NR_036210	chr1	113004391	113004455	-	MIR4256	Unmarked	5.667	1.133	13	0.709	59	66	60	48	56	86	80	72	52	49	61	59	66	92	21	72
5228	NM_004185	chr1	113010039	113063910	+	WNT2B	Unmarked	1	0.176	53.333	2.388	83	83	83	48	79	88	72	52	61	59	63	43	74	61	7	43
837	NM_024494	chr1	113051369	113063910	+	WNT2B	Bivalent	193.333	26.365	405.667	16.671	32	16	83	31	20	15	51	50	53	54	137	121	57	51	95	133
20387	NM_138728	chr1	113066140	113162040	-	ST7L	H3K4me3-only	316	47.398	13.333	0.526	42	35	62	41	25	56	58	74	62	48	102	84	51	75	73	111
20466	NM_006135	chr1	113162074	113214241	+	CAPZA1	H3K4me3-only	321	48.148	13.333	0.519	55	33	73	48	25	42	54	57	75	41	114	86	54	61	76	105
8333	NM_001130079	chr1	113217047	113243368	+	MOV10	H3K4me3-only	186.333	46.583	28.333	1.574	59	36	87	45	45	62	57	53	67	46	107	70	56	74	38	97
5729	NM_001042678	chr1	113243748	113250025	-	RHOC	H3K4me3-only	150.333	21.476	46.333	2.172	29	19	69	37	17	29	50	63	64	43	151	91	44	68	79	146
5854	NM_001042679	chr1	113243748	113249678	-	RHOC	H3K4me3-only	183.667	30.611	45	1.985	13	12	64	27	8	24	52	58	60	38	175	108	36	68	90	166
4160	NM_005167	chr1	113252615	113257950	-	PPM1J	H3K4me3-only	150.667	41.087	74.666	2.835	30	16	66	43	14	25	47	50	51	26	124	130	59	69	95	154
3907	NM_001004440	chr1	113263188	113269856	+	FAM19A3	H3K27me3-only	3.667	1.1	82.334	6.333	50	33	96	39	22	47	76	74	67	41	90	67	79	98	4	116
6543	NR_103746	chr1	113362790	113393265	-	LOC100996702	H3K4me3-only	15.333	3.833	38.333	2.018	48	45	65	51	27	57	69	78	54	49	89	69	81	80	37	100
14735	NM_003051	chr1	113454469	113498975	-	SLC16A1	H3K4me3-only	400	70.584	17.667	0.803	27	19	68	49	16	25	59	54	61	51	137	118	59	59	104	93
14961	NM_001166496	chr1	113454469	113498685	-	SLC16A1	H3K4me3-only	439.667	87.933	17.666	0.768	30	20	73	41	19	27	70	47	70	54	143	117	45	61	98	84
23747	NR_002796	chr1	113465971	113467295	+	AKR7A2P1	Unmarked	2.666	0.571	10.333	0.554	59	42	71	58	27	41	90	61	61	59	75	72	83	76	32	92
14090	NR_103744	chr1	113499036	113506690	+	LOC100506392	H3K4me3-only	395.667	69.819	18.333	0.821	27	21	61	49	17	28	57	59	56	49	98	116	58	63	103	137
19508	NR_103777	chr1	113554308	113615724	-	LOC100996251	H3K4me3-only	252	19.894	14	0.519	50	32	90	40	31	47	61	60	70	39	100	103	60	82	61	73
19149	NM_014813	chr1	113615830	113667342	+	LRIG2	H3K4me3-only	275	22.298	14.333	0.531	38	26	82	37	29	45	60	71	57	41	82	108	59	92	65	107
17471	NR_038846	chr1	113739403	113748875	-	LOC643441	Unmarked	1	0.167	15.666	0.783	106	70	73	49	64	88	82	50	49	58	41	51	78	68	3	69
5923	NM_152900	chr1	113933474	114228545	+	MAGI3	H3K4me3-only	245	81.667	44	2.694	26	12	63	29	7	31	46	56	56	40	155	129	42	57	116	134
12891	NM_006608	chr1	114239823	114301777	-	PHTF1	H3K4me3-only	245	45.94	19.666	0.881	34	26	62	35	15	54	57	64	63	34	112	113	46	76	90	118
20173	NM_018364	chr1	114304453	114355070	-	RSBN1	H3K4me3-only	160	28.234	13.666	0.586	65	42	65	43	31	55	54	54	59	39	106	103	60	57	83	83
17477	NM_012411	chr1	114356432	114414375	-	PTPN22	Unmarked	2	0.222	15.666	0.734	96	59	75	58	53	98	85	57	75	59	63	34	64	77	8	38
20009	NR_037864	chr1	114399256	114443859	+	AP4B1-AS1	Unmarked	2.333	0.778	13.667	0.976	109	84	72	65	82	108	52	61	57	35	26	36	83	76	4	49
21879	NM_001010922	chr1	114419435	114430169	-	BCL2L15	Unmarked	1	0.176	12.333	0.698	107	62	76	50	65	88	80	57	58	69	48	41	64	71	13	50
17627	NM_006594	chr1	114437370	114447741	-	AP4B1	H3K4me3-only	300	28.124	15.666	0.644	48	30	95	38	25	31	59	51	88	45	138	97	50	61	75	68
18349	NM_001253852	chr1	114437370	114447525	-	AP4B1	H3K4me3-only	228.333	22.833	15	0.625	37	32	86	37	31	43	61	64	77	48	117	97	47	77	75	70
17413	NM_022836	chr1	114447914	114456708	+	DCLRE1B	H3K4me3-only	266.667	23.53	15.666	0.653	28	27	51	50	25	46	55	85	45	38	72	99	58	100	77	143
14481	NM_198268	chr1	114471995	114520491	+	HIPK1	H3K4me3-only	250.333	57.774	18	0.857	36	35	65	53	39	43	56	59	57	49	135	92	58	69	77	76
26359	NM_198269	chr1	114493766	114520491	+	HIPK1	Unmarked	2.667	0.381	6.666	0.339	88	103	57	51	108	131	69	51	43	56	29	36	61	69	8	39
25734	NM_181358	chr1	114496498	114520491	+	HIPK1	Unmarked	0.333	0.091	7.666	0.426	49	60	66	44	69	123	81	69	42	70	56	45	59	89	10	67
8702	NM_020190	chr1	114522029	114524875	+	OLFML3	Unmarked	30.333	2.459	27	0.88	70	38	85	46	38	76	66	67	69	37	87	61	62	95	17	85
3469	NM_001270805	chr1	114631913	114696472	-	SYT6	Bivalent	132.667	19.899	98.667	4.111	30	22	79	39	20	37	52	65	66	46	122	93	53	69	74	132
4147	NM_205848	chr1	114631913	114695062	-	SYT6	Bivalent	298	74.5	75	3.082	17	20	83	29	22	29	69	51	71	55	163	106	40	66	80	98
9154	NM_015906	chr1	114935398	115053781	-	TRIM33	H3K4me3-only	264	60.928	25.667	1.085	46	8	57	44	13	19	40	56	50	35	141	147	46	66	135	96
16870	NM_005872	chr1	115110180	115124265	-	BCAS2	H3K4me3-only	262.333	34.216	16	0.857	96	44	84	57	53	63	68	42	69	53	72	68	63	66	39	62
7208	NM_001256404	chr1	115127195	115212732	-	DENND2C	H3K4me3-only	223	30.41	33.667	1.741	27	18	72	43	22	44	74	52	68	59	157	99	43	70	80	71
25546	NM_001172626	chr1	115215719	115238239	-	AMPD1	Unmarked	2.667	0.381	8	0.522	101	74	71	51	68	111	77	69	54	68	33	34	74	71	8	35
24789	NM_002524	chr1	115247084	115259515	-	NRAS	H3K4me3-only	201.333	46.465	9	0.529	70	46	63	35	39	101	86	53	63	58	119	65	42	73	38	48
14550	NM_001130523	chr1	115259533	115300671	-	CSDE1	H3K4me3-only	276	51.753	18	0.806	74	40	81	44	44	61	80	48	69	59	84	80	52	72	47	64
10612	NR_049742	chr1	115312104	115323308	-	SIKE1	H3K4me3-only	257	30.841	22.666	0.971	86	40	85	46	32	26	74	50	77	44	90	92	62	71	55	69
5498	NM_003176	chr1	115397454	115537990	+	SYCP1	H3K27me3-only	7.667	2.091	49.333	4.111	49	40	77	46	39	90	59	63	63	49	78	71	60	73	47	95
27021	NM_000549	chr1	115572444	115576930	+	TSHB	Unmarked	1.333	0.444	5.333	0.372	131	114	63	31	100	157	67	46	59	50	30	23	49	50	1	28
24742	NM_001277991	chr1	115576566	115576930	+	TSHB	Unmarked	1	0.188	9	0.519	88	94	63	47	83	108	82	60	55	64	37	33	65	68	7	45
6546	NM_005725	chr1	115590632	115632121	-	TSPAN2	H3K4me3-only	205.333	29.333	38.333	2.018	31	16	67	35	12	25	56	64	61	42	133	103	44	74	84	152
2099	NM_002506	chr1	115828536	115880857	-	NGF	Bivalent	140.667	26.377	187.334	8.781	31	15	111	28	13	18	56	39	85	42	151	120	56	50	81	103
6267	NM_001172411	chr1	116184573	116240845	+	VANGL1	H3K4me3-only	139	37.906	40.666	1.718	11	19	53	22	11	28	96	56	53	82	144	114	30	62	99	119
6150	NM_001172412	chr1	116185249	116240845	+	VANGL1	H3K4me3-only	224.667	44.933	41.667	1.736	33	21	57	34	14	49	72	61	52	48	114	112	47	78	83	124
11033	NM_001232	chr1	116242625	116311426	-	CASQ2	Unmarked	0.667	0.133	22	1.347	70	49	79	44	40	97	78	79	70	60	54	48	62	89	20	60
5674	NM_001111061	chr1	116378998	116383333	-	NHLH2	Unmarked	5.667	1.417	47	2.765	116	76	66	46	60	110	50	78	64	30	45	40	64	82	18	54
6144	NM_005599	chr1	116378998	116383747	-	NHLH2	Unmarked	3	1.286	42	2.333	106	87	62	45	75	97	61	75	54	40	53	37	65	85	8	49
13941	NM_018420	chr1	116519118	116612675	+	SLC22A15	H3K4me3-only	160	80	18.333	1.447	33	15	66	33	15	40	49	53	39	42	124	128	60	61	93	148
21929	NM_152367	chr1	116654375	116677861	+	MAB21L3	Unmarked	1.667	0.5	12	1.029	62	51	76	45	53	96	118	32	62	88	78	60	57	64	16	41
9063	NM_000701	chr1	116915794	116947396	+	ATP1A1	H3K4me3-only	214.334	80.365	26	1.814	17	12	86	34	10	21	44	46	62	39	168	133	60	49	105	113
9933	NM_001160233	chr1	116916488	116947396	+	ATP1A1	H3K4me3-only	235	78.333	24	1.6	32	12	67	25	11	44	54	54	63	28	171	119	30	79	90	120
25699	NM_001160234	chr1	116925991	116947396	+	ATP1A1	Unmarked	1.333	0.364	7.666	0.575	103	84	78	31	83	115	76	49	54	57	65	50	56	67	7	24
11750	NR_027646	chr1	116935486	116961244	-	ATP1A1OS	H3K4me3-only	190.333	31.722	21	0.9	67	46	72	46	37	45	78	46	62	58	83	90	65	57	60	87
11903	NR_027645	chr1	116941621	116961197	-	ATP1A1OS	H3K4me3-only	195.333	30.844	20.667	0.886	59	45	75	41	37	48	80	48	62	61	84	91	61	59	60	88
11785	NR_024125	chr1	116947335	116961205	-	ATP1A1OS	H3K4me3-only	195.333	30.844	20.667	0.886	62	45	74	42	37	47	78	48	62	60	84	91	62	59	60	88
11845	NR_024126	chr1	116948039	116961181	-	ATP1A1OS	H3K4me3-only	195.667	30.896	20.667	0.886	60	47	76	40	37	46	81	47	64	61	83	92	61	58	60	86
5599	NM_001779	chr1	117057155	117113715	-	CD58	H3K4me3-only	174	29	48	1.636	55	17	76	38	19	46	61	37	67	40	150	110	45	60	80	98
5249	NM_001007237	chr1	117117019	117210377	-	IGSF3	H3K4me3-only	121	27.925	53	2.484	32	16	74	27	12	40	50	48	65	38	172	120	39	56	100	110
5334	NM_001542	chr1	117117019	117209578	-	IGSF3	H3K4me3-only	142.333	30.498	51.666	2.183	56	33	65	48	19	79	72	62	69	47	102	73	58	73	52	91
13926	NR_031564	chr1	117214370	117214449	+	MIR320B1	Unmarked	1.667	0.333	18.333	1.038	138	54	101	46	50	85	65	45	81	45	55	47	70	61	7	49
16400	NM_001013643	chr1	117236733	117249225	+	C1orf137	Unmarked	2.667	0.533	16.333	0.766	76	42	96	47	36	49	85	55	64	60	74	70	86	74	12	73
24944	NM_001767	chr1	117297085	117311851	+	CD2	Unmarked	1.667	0.385	8.667	0.531	129	81	69	42	58	105	79	64	70	52	44	33	64	69	7	33
7867	NM_020440	chr1	117452688	117532972	+	PTGFRN	H3K4me3-only	223.333	55.833	30.333	1.444	23	13	78	22	11	35	55	43	75	40	196	129	27	56	110	86
19341	NM_001256111	chr1	117544371	117579173	+	CD101	Unmarked	2	0.546	14.333	0.878	71	66	72	56	54	126	73	71	58	51	44	40	82	80	4	51
22745	NM_003594	chr1	117602948	117645491	+	TTF2	H3K4me3-only	244.667	28.23	11.333	0.486	50	25	79	35	31	63	66	53	64	53	104	93	44	72	64	103
20067	NR_030640	chr1	117637264	117637350	+	MIR942	Unmarked	2.333	0.636	13.666	0.774	75	48	94	46	41	77	84	54	77	57	83	52	71	73	8	59
10219	NM_001145635	chr1	117653676	117664411	-	TRIM45	H3K4me3-only	206	47.542	23.333	1.373	33	18	85	35	12	37	65	56	84	56	135	98	42	59	88	96
10643	NM_024626	chr1	117686208	117753582	-	VTCN1	Unmarked	1.667	0.294	22.666	1.214	34	36	89	50	27	55	81	64	59	42	92	81	89	94	13	93
13757	NM_001253849	chr1	117686208	117746458	-	VTCN1	Unmarked	3	1.5	18.666	1.556	96	76	76	40	51	89	69	78	60	48	48	46	81	75	9	57
6459	NM_006699	chr1	117910084	118068320	+	MAN1A2	H3K4me3-only	249.667	68.085	39	1.887	27	17	93	33	19	37	44	51	83	30	126	125	41	67	100	106
3221	NM_017709	chr1	118148603	118171011	+	FAM46C	Bivalent	159	29.814	109.333	5.655	57	15	82	42	22	31	52	52	66	39	117	99	50	72	71	132
15657	NM_001135589	chr1	118419843	118472302	-	GDAP2	H3K4me3-only	429.667	58.594	17	0.879	36	20	78	57	19	38	56	65	69	47	103	93	67	72	76	103
15871	NM_006784	chr1	118472371	118503049	+	WDR3	H3K4me3-only	426	58.094	17	0.895	46	22	78	42	16	33	68	69	72	60	112	90	53	72	76	90
20175	NM_206996	chr1	118496287	118727848	-	SPAG17	H3K4me3-only	82.667	9.92	13.666	0.854	63	33	89	45	28	67	70	55	86	54	101	60	53	67	40	88
525	NM_152380	chr1	119425665	119532179	-	TBX15	Bivalent	27.333	5.125	548	23.155	70	33	74	38	26	81	63	73	63	46	103	71	56	83	44	75
20408	NM_201263	chr1	119573838	119683295	-	WARS2	H3K4me3-only	139.667	14.965	13.333	0.597	69	31	78	47	37	62	59	70	64	41	62	86	56	93	54	90
10948	NM_001005783	chr1	119911401	119936751	+	HAO2	Unmarked	1.333	0.444	22	0.857	92	56	73	49	52	91	82	57	66	58	73	39	60	77	9	65
13101	NM_001166120	chr1	119957553	119965662	+	HSD3B2	Unmarked	2.333	0.412	19.333	1.289	84	70	80	49	57	101	70	68	66	49	65	40	76	76	5	43
12204	NM_000198	chr1	119957742	119965662	+	HSD3B2	Unmarked	2	0.316	20.333	1.356	80	54	89	46	45	91	77	67	78	53	82	41	66	82	6	42
19335	NM_000862	chr1	120049825	120057681	+	HSD3B1	Unmarked	2.333	0.5	14.333	0.768	75	67	91	47	44	84	82	61	86	52	79	39	75	68	4	45
19623	NR_033781	chr1	120106502	120115199	+	HSD3BP4	Unmarked	1.333	0.174	14	0.875	92	68	90	48	50	91	69	63	77	42	69	43	80	71	3	43
26436	NR_036540	chr1	120140324	120141914	-	LINC00622	Unmarked	0	0	6.333	0.864	59	89	47	49	72	150	90	63	49	54	36	40	64	83	6	48
9695	NM_001080470	chr1	120161999	120190390	-	ZNF697	H3K4me3-only	334	37.111	24.333	1.141	35	22	92	33	13	22	73	43	68	49	150	112	66	58	65	98
14783	NM_006623	chr1	120254418	120286849	+	PHGDH	H3K4me3-only	262.667	71.649	17.667	0.779	70	70	87	27	45	88	72	61	78	50	74	66	62	58	34	57
11629	NM_005518	chr1	120290618	120311555	-	HMGCS2	Unmarked	3	0.45	21	1.125	75	40	93	65	49	69	73	52	61	49	58	67	88	85	10	65
23157	NM_001159353	chr1	120344945	120354203	-	REG4	Unmarked	2	0.5	11	0.868	96	71	72	46	56	113	83	64	69	62	56	36	64	70	12	29
23872	NM_001047980	chr1	120377387	120387503	-	NBPF7	Unmarked	1.333	0.308	10	0.909	102	63	81	54	45	72	86	53	78	56	56	43	75	65	10	60
5140	NM_021794	chr1	120436155	120439147	-	ADAM30	Unmarked	6	1.125	54.667	2.377	65	31	72	54	30	74	67	74	64	51	72	63	63	90	39	90
11589	NM_024408	chr1	120454175	120612317	-	NOTCH2	H3K4me3-only	59	59	21	3.15	27	25	68	37	16	35	70	52	69	37	131	121	44	76	89	102
27907	NM_001100910	chr1	120839004	120855681	+	FAM72B	H3K4me3-only	19.333	14.503	1.333	0.571	82	27	103	47	27	36	48	37	106	32	145	78	45	52	65	69
27508	NR_027337	chr1	120906033	120914842	+	HIST2H2BA	Unmarked	2.333	1.167	4	0.8	108	46	89	53	51	64	50	54	64	54	47	76	73	54	55	61
27831	NM_001244910	chr1	120927646	120935944	-	FCGR1B	Unmarked	0	0	2	0.75	82	66	88	42	52	107	82	65	82	56	60	32	62	76	1	46
10046	NR_003955	chr1	121260909	121313686	+	EMBP1	H3K4me3-only	135.667	20.352	23.666	1.365	60	29	87	33	30	26	56	58	61	45	126	108	58	70	72	80
27859	NR_046228	chr1	142697420	142713605	-	ANKRD20A12P	Unmarked	0.667	0.5	2	0.462	177	88	78	53	71	89	67	48	88	41	24	28	61	57	11	18
28074	NR_033189	chr1	143687129	143714180	+	LOC100130000	Unmarked	0	10	0	10	60	50	77	45	42	89	82	45	73	66	103	64	57	52	45	49
23127	NR_027469	chr1	143718512	143744587	-	LINC00875	H3K4me3-only	36	53.973	11	4.715	40	27	68	36	13	45	61	68	70	51	132	90	48	65	82	103
27749	NM_001123068	chr1	143767143	143767881	-	PPIAL4G	Unmarked	0.333	1	2.667	0.8	143	56	91	59	34	55	76	48	85	49	53	49	87	54	15	45
28018	NM_207418	chr1	143896451	143913143	-	FAM72D	Unmarked	1.667	2.499	0.333	0.2	80	25	102	52	27	36	47	35	107	30	141	79	45	54	68	71
28115	NM_001278267	chr1	144146810	146467744	+	LOC100288142	Unmarked	0	10	0	10	118	64	85	50	39	72	77	60	73	48	46	52	87	64	10	54
27479	NR_003242	chr1	144610814	144612727	-	PFN1P2	Unmarked	0.667	0.667	4	0.8	51	99	54	76	90	38	67	42	52	48	80	58	87	51	37	69
27384	NR_037182	chr1	144676436	144680025	-	LOC653513	Unmarked	0.333	0.333	4.333	0.542	127	86	75	44	81	101	67	58	65	54	41	28	59	65	6	42
208	NM_001198832	chr1	144851423	145039992	-	PDE4DIP	Bivalent	281	12.582	806.333	11.63	46	30	75	39	26	46	68	78	63	52	98	84	55	90	56	93
3964	NM_001002812	chr1	144890590	144995022	-	PDE4DIP	Unmarked	29.667	1.483	80	1.143	56	43	80	37	33	66	71	75	52	50	90	76	75	86	27	82
4186	NM_001002811	chr1	144890590	144932032	-	PDE4DIP	H3K4me3-only	430.333	28.064	74	1.48	27	23	84	33	11	33	72	49	79	39	117	130	51	70	92	89
389	NM_022359	chr1	144951760	145076186	-	PDE4DIP	Bivalent	155	7.881	639.333	9.005	117	54	99	51	42	50	65	25	109	33	110	61	52	45	40	46
3985	NM_001002810	chr1	144951760	144995033	-	PDE4DIP	Unmarked	30	1.429	79.667	1.149	56	43	80	37	34	66	70	75	52	49	91	77	74	86	28	81
3999	NM_001195261	chr1	144951760	144995082	-	PDE4DIP	Unmarked	29.667	1.459	79	1.15	61	46	81	36	37	69	72	77	55	49	76	75	71	90	26	78
6446	NM_001195260	chr1	144951760	144997111	-	PDE4DIP	Unmarked	2.667	0.25	39	0.657	134	66	91	47	64	90	59	45	79	38	62	45	62	63	12	42
11438	NM_004892	chr1	145096406	145116997	+	SEC22B	H3K4me3-only	198.333	34.998	21.333	0.744	86	51	75	49	51	90	64	56	75	51	75	54	48	70	41	63
6312	NM_203458	chr1	145209110	145285912	+	NOTCH2NL	Bivalent	87	26.103	40	4.8	21	19	68	37	15	36	67	53	67	38	135	122	42	78	92	109
11787	NM_001039703	chr1	145293370	146466121	+	NBPF10	Unmarked	2	0.333	20.667	0.674	82	63	78	59	42	82	79	67	73	56	53	41	85	70	12	57
4111	NM_213652	chr1	145413190	145417545	+	HFE2	H3K27me3-only	2.667	0.471	76	5.561	72	61	60	58	59	79	64	85	56	33	52	42	64	115	6	93
8182	NM_006472	chr1	145438461	145442628	+	TXNIP	H3K4me3-only	239	28.681	29	1.16	73	42	63	49	45	103	55	73	53	45	68	61	57	86	41	85
1956	NM_032305	chr1	145456235	145470387	-	POLR3GL	Bivalent	138	17.999	202	9.469	62	46	71	46	49	79	60	79	64	45	65	62	50	97	40	84
1932	NM_001039888	chr1	145470507	145475647	+	ANKRD34A	Bivalent	135.667	18.501	204.667	9.904	67	42	98	41	40	68	55	66	82	46	92	64	59	73	38	68
2368	NM_153713	chr1	145477084	145499091	+	LIX1L	Bivalent	81.333	10.167	162.334	7.492	29	41	56	42	27	56	77	63	47	36	82	106	64	90	57	126
21638	NM_005105	chr1	145507556	145513535	+	RBM8A	H3K4me3-only	285.333	45.055	12.333	0.74	78	53	85	47	51	89	62	50	88	50	90	53	46	60	44	53
6883	NR_002328	chr1	145509819	145516076	-	GNRHR2	H3K4me3-only	188	20.144	35.667	1.597	52	29	84	51	27	38	53	71	61	43	80	85	76	80	52	117
6933	NR_073492	chr1	145516164	145523732	+	PEX11B	H3K4me3-only	196.333	21.036	35.333	1.582	41	33	82	41	27	58	77	56	79	53	119	83	50	74	57	69
6754	NM_001184795	chr1	145516559	145523732	+	PEX11B	H3K4me3-only	202	25.25	36.666	1.507	42	39	75	40	23	43	75	63	72	53	113	85	59	69	60	88
6726	NR_073493	chr1	145516597	145523732	+	PEX11B	H3K4me3-only	203.333	25.417	36.667	1.507	41	38	76	40	25	49	74	64	70	54	111	82	59	71	55	90
17800	NM_003637	chr1	145524989	145543868	+	ITGA10	Unmarked	4	1	15.333	1.045	108	104	67	42	93	85	67	53	64	45	70	29	56	64	4	48
3711	NM_144698	chr1	145549208	145568526	+	ANKRD35	Bivalent	64.667	13.856	89.333	4.702	30	26	65	25	17	75	71	77	49	50	123	85	50	89	48	119
11958	NM_006099	chr1	145575987	145586546	+	PIAS3	H3K4me3-only	283	84.908	20.666	1	32	30	77	31	29	38	63	49	69	44	169	97	40	66	70	95
9190	NM_001012758	chr1	145586492	145589435	-	NUDT17	H3K4me3-only	109.333	23.427	25.666	1.283	51	37	85	32	32	59	78	50	72	62	110	81	49	61	53	87
26222	NM_006468	chr1	145592604	145610884	-	POLR3C	H3K4me3-only	310.667	35.845	6.667	0.408	80	26	83	37	31	46	54	50	73	53	89	95	43	56	83	100
26374	NM_014455	chr1	145611035	145688776	+	RNF115	H3K4me3-only	276.333	43.634	6.666	0.444	34	22	52	51	23	61	47	73	50	34	110	106	52	87	91	106
6122	NM_007053	chr1	145695797	145715565	-	CD160	Unmarked	1.333	0.286	42	2.032	93	52	89	43	37	82	69	66	90	43	89	37	58	77	12	62
14596	NM_002614	chr1	145727665	145764206	+	PDZK1	Unmarked	5	0.714	18	0.9	46	31	92	39	27	74	79	60	70	50	111	66	64	86	15	89
27699	NM_001097613	chr1	145764594	145827103	-	GPR89A	H3K4me3-only	92.333	55.389	3	0.692	32	45	60	49	44	61	66	68	47	56	75	81	63	77	59	116
27518	NR_049745	chr1	146310551	146334210	+	HYDIN2	Unmarked	0.667	0.667	4	1.715	106	60	76	54	56	62	73	61	63	40	57	51	70	90	5	75
26232	NM_001278141	chr1	146373856	146467639	+	NBPF12	H3K4me3-only	60.667	26.004	6.667	1.111	40	21	70	27	25	66	63	54	54	54	123	112	39	66	88	97
21370	NR_024442	chr1	146490894	146514599	-	LOC728989	Unmarked	0.667	0.222	12.666	1.151	88	79	68	40	84	131	72	72	51	53	27	40	53	96	4	41
21632	NR_103466	chr1	146571065	146585928	-	NBPF13P	Unmarked	2.333	0.778	12.333	1.028	85	72	69	53	50	96	86	74	62	57	41	39	81	81	4	49
17806	NM_005399	chr1	146626684	146644129	-	PRKAB2	H3K4me3-only	239.667	44.94	15.333	0.708	25	23	76	36	19	37	55	49	56	43	142	120	60	57	88	113
24882	NR_002305	chr1	146649429	146651528	+	PDIA3P	Unmarked	3.333	0.5	8.999	0.71	118	68	69	59	56	46	65	59	79	41	41	53	62	70	39	74
6332	NM_001461	chr1	146657837	146697230	-	FMO5	H3K4me3-only	94.333	18.867	40	2.182	102	39	84	44	42	88	68	58	67	63	63	55	57	67	33	69
11640	NM_001256338	chr1	146714290	146767447	+	CHD1L	H3K4me3-only	173.667	23.683	21	1.189	40	33	64	49	29	43	65	42	60	38	125	116	57	65	86	87
19837	NR_038423	chr1	146853913	146989699	-	LINC00624	Unmarked	2.667	0.533	14	0.824	115	55	76	67	40	49	72	59	81	44	67	48	77	72	25	52
11032	NM_004326	chr1	147013181	147098015	+	BCL9	H3K4me3-only	135	36.815	22	1.031	51	26	106	29	17	66	102	62	90	71	94	65	54	84	18	64
13986	NM_016361	chr1	147119167	147142634	-	ACP6	H3K4me3-only	174.333	37.354	18.333	1.038	54	24	70	53	27	47	66	66	55	53	99	85	64	82	57	97
7132	NM_005266	chr1	147228331	147245484	-	GJA5	Unmarked	13	2.438	34.333	1.689	97	36	133	36	36	61	64	32	116	43	132	52	54	53	13	41
9452	NM_181703	chr1	147228331	147232714	-	GJA5	Unmarked	2.333	0.467	25	1.293	66	41	101	61	35	64	75	49	86	46	125	49	82	72	6	41
21984	NM_005267	chr1	147374945	147381395	+	GJA8	Unmarked	1.667	0.385	12	0.818	91	58	79	50	48	79	64	66	60	39	73	54	80	81	9	68
26585	NM_016334	chr1	147400505	147465753	+	GPR89B	H3K4me3-only	79.333	39.666	6.333	1.462	34	43	61	48	44	60	64	66	46	55	75	88	63	76	63	113
18716	NR_049810	chr1	147806602	147806678	-	MIR5087	H3K4me3-only	176.667	17.097	14.667	0.698	61	28	77	44	37	79	88	59	54	77	77	77	57	79	43	62
26468	NM_015383	chr1	148250248	148346756	-	NBPF14	Unmarked	0	0	6.333	2.715	80	63	74	60	43	85	80	66	69	56	55	41	85	70	12	60
2817	NM_001170755	chr1	148558187	148596267	+	NBPF15	H3K27me3-only	1.667	0.417	131.333	12.313	42	76	57	38	63	164	91	63	44	65	45	46	64	77	7	57
14064	NM_173638	chr1	148560846	148596267	+	NBPF15	Unmarked	0.667	0.667	18.333	2.619	67	55	69	54	42	80	73	77	58	52	54	50	78	85	18	87
27974	NM_001144032	chr1	148644010	148644795	+	PPIAL4E	Unmarked	0	0	0.667	1	143	57	87	57	36	54	80	51	83	51	54	46	82	59	13	46
1835	NR_027355	chr1	148928285	148951595	+	LOC645166	Bivalent	36.333	6.411	216.667	12.5	39	22	87	36	9	40	76	57	68	49	129	98	67	71	52	99
2382	NR_027354	chr1	148930404	148953054	+	LOC645166	Bivalent	19	3	161.667	8.818	21	16	88	48	9	22	98	52	77	61	146	73	65	82	25	116
6943	NR_103751	chr1	149125597	149154987	-	NBPF23	H3K27me3-only	1	3.003	35.333	5.048	61	57	57	52	44	107	91	65	57	60	68	48	65	83	17	67
22264	NR_027002	chr1	149279475	149291742	+	LOC388692	Unmarked	0	0	11.667	2.059	59	54	70	47	39	72	94	70	52	64	66	61	81	84	13	73
27734	NR_027484	chr1	149369293	149378297	+	FCGR1C	Unmarked	0	0	3	0.9	79	66	88	40	51	107	82	65	82	57	62	35	61	74	5	45
27393	NR_046136	chr1	149576261	149672733	+	LINC00869	Unmarked	6.667	10	4.333	4.333	43	31	68	33	17	65	55	70	69	43	117	87	46	67	77	111
26996	NM_000566	chr1	149754249	149764074	+	FCGR1A	Unmarked	0	0	5.333	1.231	82	67	88	38	51	107	83	65	81	57	60	36	61	74	4	45
27100	NM_001024599	chr1	149783433	149783928	-	HIST2H2BF	H3K4me3-only	51.667	22.146	5	0.833	109	49	85	54	54	64	42	57	58	48	49	77	76	57	56	64
27436	NM_001123375	chr1	149784779	149785236	-	HIST2H3D	H3K4me3-only	40.666	122.12	4.333	0.867	105	65	78	44	50	61	53	50	67	29	67	86	69	59	52	64
26004	NR_036461	chr1	149821758	149822340	-	HIST2H2BC	H3K4me3-only	24.333	73.072	7.333	0.759	56	31	68	53	24	41	48	70	53	40	64	114	75	72	91	99
16371	NM_003528	chr1	149856009	149858232	-	HIST2H2BE	H3K4me3-only	216.333	64.906	16.666	0.769	77	31	71	59	27	47	48	60	57	41	66	101	78	63	80	93
13940	NM_003517	chr1	149858524	149858961	+	HIST2H2AC	H3K4me3-only	211.333	70.444	18.333	0.873	81	34	62	51	31	85	62	58	50	50	76	90	65	67	67	70
18631	NM_175065	chr1	149859018	149859466	-	HIST2H2AB	H3K4me3-only	267.667	34.912	14.667	0.71	98	42	70	47	42	72	49	69	46	45	75	81	72	73	53	65
11038	NM_016074	chr1	149871154	149872348	+	BOLA1	H3K4me3-only	105.333	12.153	22	1.269	42	43	59	46	34	59	69	80	44	59	92	77	70	81	52	92
9909	NM_014849	chr1	149874871	149889434	-	SV2A	H3K4me3-only	155.667	23.349	24	0.911	41	40	58	41	29	80	79	76	59	55	122	50	52	88	27	102
17852	NM_005850	chr1	149895208	149900144	-	SF3B4	H3K4me3-only	194.667	32.444	15.333	0.687	70	46	84	42	40	69	58	72	66	48	82	65	66	75	38	78
7968	NM_181873	chr1	149900542	149908266	-	MTMR11	H3K4me3-only	22.333	4.188	29.667	1.483	47	32	83	42	36	61	72	81	66	59	82	50	56	98	19	115
8980	NM_001145862	chr1	149900542	149908791	-	MTMR11	H3K4me3-only	41.667	7.353	26.333	1.317	65	37	79	47	25	74	57	94	70	51	84	35	68	87	20	106
19382	NM_020205	chr1	149912231	149982686	-	OTUD7B	H3K4me3-only	219.667	73.222	14.333	0.915	52	27	64	49	24	45	46	84	60	43	94	76	56	85	68	126
20549	NM_007259	chr1	150039341	150117505	+	VPS45	H3K4me3-only	334.333	83.583	13.333	0.678	60	41	70	44	29	62	56	69	53	46	86	81	73	67	54	108
6356	NM_016274	chr1	150122169	150131825	+	PLEKHO1	H3K4me3-only	184	110.444	39.667	2.833	24	15	50	23	8	31	49	50	56	39	154	144	24	53	139	140
11672	NM_030920	chr1	150190716	150208504	-	ANP32E	H3K4me3-only	257	33.52	21	0.969	86	46	76	46	42	60	89	51	69	77	92	55	57	59	36	58
14807	NM_001136479	chr1	150190716	150207026	-	ANP32E	H3K4me3-only	303.333	56.878	17.667	0.841	69	34	68	34	30	86	59	65	67	62	115	73	39	58	75	65
11387	NM_012113	chr1	150230217	150237480	+	CA14	H3K4me3-only	273	35.607	21.333	0.865	56	43	97	44	35	41	70	71	74	42	79	63	74	91	13	106
16000	NR_045035	chr1	150237798	150241609	-	APH1A	H3K4me3-only	166.667	29.41	16.667	0.926	46	48	45	41	35	90	55	86	45	45	84	66	54	83	56	120
22024	NM_024579	chr1	150245182	150253335	+	C1orf54	H3K4me3-only	36.333	4.542	12	0.621	85	40	113	37	37	74	69	59	93	56	110	42	59	69	10	46
5919	NM_144697	chr1	150255228	150259501	+	C1orf51	H3K4me3-only	174.667	32.752	44	1.714	44	41	85	42	37	58	69	60	81	50	133	69	50	75	46	59
22513	NM_018997	chr1	150266268	150280819	+	MRPS21	H3K4me3-only	278.667	27.867	11.666	0.538	60	52	73	34	40	106	67	79	71	60	70	57	49	73	48	60
20044	NM_004698	chr1	150293927	150325704	+	PRPF3	H3K4me3-only	214.667	46.007	13.666	0.911	90	25	98	41	30	41	62	42	88	60	138	76	45	49	65	49
11683	NM_015203	chr1	150336989	150449041	+	RPRD2	H3K4me3-only	340.333	56.722	21	0.851	65	32	75	41	34	65	70	52	59	60	88	88	55	65	62	88
17778	NR_073514	chr1	150459839	150480085	+	TARS2	H3K4me3-only	227	37.833	15.333	0.807	75	49	69	52	58	67	61	68	54	65	65	48	58	74	36	100
22259	NM_004425	chr1	150480486	150486265	+	ECM1	Unmarked	1.666	0.263	11.667	0.614	60	38	101	45	27	58	72	72	81	45	94	57	76	88	9	76
9322	NR_051960	chr1	150488232	150490508	+	LINC00568	H3K4me3-only	191.667	33.822	25.333	1.288	68	24	87	39	19	33	48	64	69	38	100	96	62	69	68	115
3630	NM_025008	chr1	150521897	150531223	+	ADAMTSL4	Bivalent	66.333	9.949	92.667	5.148	18	8	64	38	11	15	49	55	56	42	143	128	43	65	112	152
5869	NR_036211	chr1	150524404	150524490	+	MIR4257	Unmarked	4.667	0.609	44.667	1.971	54	27	107	41	23	37	86	53	88	52	121	63	63	84	10	90
14427	NM_182763	chr1	150547026	150552214	-	MCL1	H3K4me3-only	180	28.423	18	0.73	66	26	69	43	30	55	40	57	55	38	102	94	53	63	78	130
18566	NM_207046	chr1	150594598	150601609	-	ENSA	H3K4me3-only	265	37.857	15	0.616	69	36	76	51	42	70	70	47	67	66	113	61	55	57	47	72
18735	NM_004436	chr1	150594598	150602098	-	ENSA	H3K4me3-only	223	23.068	14.667	0.62	48	31	66	51	31	58	63	71	55	55	90	77	63	78	58	104
23007	NM_018178	chr1	150618700	150669672	-	GOLPH3L	H3K4me3-only	140.333	22.159	11	0.635	90	60	63	52	57	104	68	57	53	54	63	47	65	69	22	75
25386	NM_001199829	chr1	150670534	150693364	-	HORMAD1	Unmarked	1.666	0.454	8	0.48	105	41	69	51	43	69	74	55	57	63	69	67	61	68	43	64
26529	NM_001199739	chr1	150702671	150738433	-	CTSS	Unmarked	1	0.3	6.333	0.559	102	68	63	46	57	118	79	71	57	50	45	40	63	89	5	46
15334	NM_000396	chr1	150768683	150780917	-	CTSK	Unmarked	3.333	0.909	17.333	0.929	98	82	69	52	71	92	61	66	61	36	40	41	72	79	8	71
21533	NM_001668	chr1	150782180	150849244	-	ARNT	H3K4me3-only	89	17.8	12.666	0.691	24	29	65	41	26	63	66	50	64	38	154	99	45	75	70	90
22286	NM_001145415	chr1	150898814	150937220	+	SETDB1	H3K4me3-only	189	33.351	11.667	0.66	79	45	59	50	53	96	73	52	63	64	95	51	38	69	46	66
8969	NM_181746	chr1	150937648	150947479	-	CERS2	H3K4me3-only	166	71.153	26.333	1.58	22	4	69	28	9	31	48	46	55	49	195	126	36	50	114	117
14487	NM_003568	chr1	150954498	150968114	+	ANXA9	Unmarked	15.333	2	18	0.783	45	25	90	57	22	50	78	66	55	45	92	76	95	96	8	99
12554	NM_001163258	chr1	150969300	150980854	-	FAM63A	H3K4me3-only	199.333	26.002	20	0.75	52	37	59	62	32	65	53	84	56	51	68	63	70	81	57	109
13649	NM_001163259	chr1	150969300	150979273	-	FAM63A	H3K4me3-only	43.333	5.2	18.667	0.709	72	32	81	49	29	67	68	75	62	37	57	73	71	103	23	100
13787	NM_001040217	chr1	150969300	150979385	-	FAM63A	H3K4me3-only	37.666	4.913	18.666	0.718	65	33	86	46	32	69	73	70	65	44	61	74	68	98	23	92
12197	NM_021222	chr1	150980972	151008189	+	PRUNE	H3K4me3-only	234	28.081	20.333	0.792	53	39	66	48	28	59	77	66	77	64	110	61	48	68	59	76
20731	NM_001159642	chr1	151009028	151020076	+	BNIPL	Unmarked	6	1.2	13.333	0.755	84	40	84	54	41	103	69	52	73	52	82	40	64	71	11	79
14815	NM_017860	chr1	151020258	151023871	+	C1orf56	H3K4me3-only	181.333	36.267	17.667	0.855	51	32	77	46	32	61	63	52	70	40	88	87	53	74	58	115
12870	NM_001038707	chr1	151023446	151032125	-	CDC42SE1	H3K4me3-only	267	38.143	19.666	0.663	47	27	83	33	30	51	61	60	61	60	132	80	51	64	58	101
12914	NM_006818	chr1	151032150	151040973	+	MLLT11	H3K4me3-only	264.333	36.047	19.333	0.644	55	30	65	56	31	49	51	61	61	33	102	80	59	80	58	128
13928	NM_144618	chr1	151043079	151091007	+	GABPB2	H3K4me3-only	245	25.344	18.333	0.775	87	30	83	55	20	47	53	65	78	44	89	73	71	64	58	82
3608	NM_030913	chr1	151104162	151119140	-	SEMA6C	Bivalent	217.333	29.638	93.667	3.427	29	25	79	31	12	30	57	74	70	45	140	101	52	73	81	100
22108	NM_001204848	chr1	151129104	151142773	+	TNFAIP8L2-SCNM1	Unmarked	3.666	0.55	12	0.571	73	47	99	46	42	73	71	55	76	48	98	56	74	73	10	58
22199	NM_024575	chr1	151129104	151132225	+	TNFAIP8L2	Unmarked	3.666	0.55	12	0.571	73	47	99	46	42	73	71	55	76	48	98	56	74	73	10	58
13007	NM_212551	chr1	151132223	151138370	-	LYSMD1	H3K4me3-only	311	35.883	19.333	0.652	60	38	80	50	25	65	70	72	90	46	98	59	53	83	45	65
13435	NM_001136543	chr1	151132223	151138424	-	LYSMD1	H3K4me3-only	337.333	38.922	19	0.64	62	41	79	50	25	65	69	74	92	45	96	56	53	81	46	65
13288	NM_024041	chr1	151138497	151142773	+	SCNM1	H3K4me3-only	350	37.497	19	0.633	65	41	87	44	25	62	52	89	78	49	69	58	69	76	47	88
19329	NM_013353	chr1	151142462	151148547	-	TMOD4	Unmarked	2	0.3	14.333	0.729	58	71	59	52	66	86	88	67	57	64	71	36	59	87	10	68
17425	NM_001271087	chr1	151148775	151162689	-	VPS72	H3K4me3-only	215	33.949	15.666	0.691	76	34	103	46	40	29	58	43	100	49	141	69	43	59	56	53
19589	NM_003557	chr1	151171020	151222007	+	PIP5K1A	H3K4me3-only	306	41.729	14	0.737	61	31	80	48	28	79	66	57	82	61	101	64	49	59	61	72
22658	NM_002810	chr1	151227196	151239954	+	PSMD4	H3K4me3-only	199.333	31.475	11.333	0.654	48	34	71	41	36	71	60	64	60	53	111	74	51	73	56	96
14435	NM_020832	chr1	151254790	151264381	+	ZNF687	H3K4me3-only	264	44	18	0.692	45	19	85	42	24	26	51	41	69	42	155	103	54	55	77	111
17488	NM_001198773	chr1	151264272	151300133	-	PI4KB	H3K4me3-only	183.333	20.37	15.666	0.671	54	39	60	45	46	74	51	73	46	47	89	75	51	84	57	108
18593	NM_001198774	chr1	151264272	151300191	-	PI4KB	H3K4me3-only	188.667	21.768	14.999	0.634	59	41	61	43	48	76	51	67	49	46	93	78	48	79	61	99
12957	NM_000449	chr1	151313115	151319769	-	RFX5	H3K4me3-only	123.333	28.464	19.333	1.074	63	39	82	47	34	75	65	50	76	52	105	63	58	58	44	88
14964	NM_003944	chr1	151336777	151345210	-	SELENBP1	H3K4me3-only	22.333	3.046	17.666	0.828	60	40	81	65	34	38	68	56	59	37	89	70	92	81	18	111
13121	NM_002796	chr1	151372040	151374412	+	PSMB4	H3K4me3-only	317.666	45.381	19.333	0.906	71	45	67	42	27	55	59	72	68	49	95	78	60	64	69	78
18536	NM_001194938	chr1	151375199	151431941	-	POGZ	H3K4me3-only	75.666	16.213	15	0.789	57	27	59	40	24	81	51	67	58	46	109	73	44	68	68	127
22830	NM_207171	chr1	151375199	151414681	-	POGZ	Unmarked	2.667	0.471	11.333	0.641	90	81	67	36	64	97	86	63	61	69	60	33	58	64	10	60
18846	NM_020770	chr1	151483861	151511167	+	CGN	H3K4me3-only	187	31.167	14.666	0.571	36	16	101	35	14	29	54	37	98	42	153	101	41	46	86	110
10176	NM_020127	chr1	151512780	151556059	+	TUFT1	H3K4me3-only	222	31.714	23.333	0.946	44	29	66	44	26	56	80	57	60	56	96	94	53	78	65	95
21158	NR_030280	chr1	151518271	151518367	+	MIR554	Unmarked	3	1.125	12.667	0.826	64	62	64	43	61	157	67	81	50	48	59	38	58	99	4	44
18730	NM_030918	chr1	151584661	151671559	+	SNX27	H3K4me3-only	212	53	14.667	0.83	40	31	50	44	26	33	47	60	45	39	130	110	54	62	97	131
4801	NM_007185	chr1	151672533	151689290	-	CELF3	H3K4me3-only	56.667	9.999	60.667	2.758	30	35	82	40	22	57	51	77	67	29	128	65	68	86	28	134
5109	NM_001172649	chr1	151672533	151688882	-	CELF3	H3K4me3-only	47.333	5.917	55.333	2.441	30	30	87	37	15	38	62	64	70	32	131	78	69	79	31	146
5304	NM_001172648	chr1	151672533	151688792	-	CELF3	H3K4me3-only	44.667	6.091	52	2.364	32	27	87	37	15	37	61	61	65	30	138	85	72	79	32	141
2794	NM_001144956	chr1	151694012	151702082	+	RIIAD1	Bivalent	59.333	14.833	132.667	7.96	64	28	86	41	25	52	53	58	70	38	111	85	61	70	53	104
16060	NM_031420	chr1	151732122	151736040	-	MRPL9	H3K4me3-only	261.333	46.115	16.667	0.833	42	36	73	40	39	70	57	67	50	54	108	88	60	72	63	80
21236	NM_001134939	chr1	151735444	151743806	+	OAZ3	H3K4me3-only	238	41.998	12.667	0.603	68	45	81	51	41	63	48	67	60	44	59	71	76	67	47	111
13080	NM_016178	chr1	151739130	151743806	+	OAZ3	Unmarked	1.333	0.4	19.333	1.137	90	62	74	63	68	74	66	53	59	50	78	40	72	75	8	67
20852	NM_001083965	chr1	151745954	151763010	-	TDRKH	H3K4me3-only	199	31.423	13	0.78	43	35	73	42	20	54	88	49	78	55	135	93	52	67	64	51
9171	NM_001004432	chr1	151772764	151777882	-	LINGO4	Unmarked	1.666	0.625	25.667	1.481	60	34	93	46	20	59	65	64	66	35	85	73	87	81	15	116
8167	NM_001001523	chr1	151778546	151798553	-	RORC	Unmarked	11.333	1.619	29	1.403	51	26	86	46	20	34	91	47	63	59	124	78	76	73	22	103
8326	NM_005060	chr1	151778546	151804348	-	RORC	Unmarked	2.333	0.467	28.333	1.288	72	37	108	42	23	30	70	63	86	44	109	57	78	76	8	96
5405	NM_001136003	chr1	151810338	151813033	-	C2CD4D	H3K4me3-only	57.667	6.407	50.333	1.911	71	42	104	48	43	51	78	53	80	47	86	64	71	85	9	67
1710	NR_024237	chr1	151810944	151816641	+	LOC100132111	Bivalent	78.666	23.602	230.667	8.76	19	12	72	31	7	15	44	39	53	34	160	162	55	44	133	119
9792	NM_182578	chr1	151819576	151826173	-	THEM5	Unmarked	3	0.9	24.333	1.521	54	41	85	49	33	68	64	67	50	42	65	75	92	81	19	114
11440	NM_053055	chr1	151843342	151882361	-	THEM4	H3K4me3-only	132.667	22.111	21.333	1.049	64	41	72	47	53	46	50	49	51	45	88	96	56	65	70	106
4737	NM_002966	chr1	151955385	151966714	-	S100A10	Bivalent	110	22	62	3.207	42	22	72	49	27	38	51	58	56	45	107	101	60	69	79	123
17169	NR_103561	chr1	151990753	151994985	+	NBPF18P	Unmarked	3.333	0.833	16	1.021	103	63	73	60	42	76	84	55	74	52	53	44	81	66	12	61
7353	NM_005620	chr1	152004981	152009511	-	S100A11	H3K4me3-only	90	38.577	33	1.904	81	29	91	44	31	53	50	54	73	38	121	78	59	68	48	81
22811	NM_001008536	chr1	152056619	152061540	-	TCHHL1	Unmarked	1.333	0.286	11.333	0.829	113	79	63	52	59	94	75	57	62	42	62	42	73	71	7	48
5260	NM_007113	chr1	152078792	152087930	-	TCHH	H3K27me3-only	2.667	0.667	52.667	3.16	79	77	67	47	67	99	75	68	51	55	60	42	73	79	5	55
19499	NM_001122965	chr1	152126070	152131704	-	RPTN	Unmarked	3.333	0.714	14	0.933	81	71	74	57	68	77	76	62	55	50	67	46	78	85	2	50
24028	NM_001009931	chr1	152184551	152196672	-	HRNR	Unmarked	1.667	0.417	10	0.588	86	70	78	50	73	99	69	62	63	47	62	40	63	87	3	47
27070	NM_002016	chr1	152274650	152297679	-	FLG	Unmarked	1	0.273	5.333	0.372	118	86	73	49	93	92	66	47	54	56	66	32	62	64	3	38
24400	NR_103778	chr1	152285934	152339168	+	FLG-AS1	Unmarked	3.667	1.833	9.333	0.966	12	38	51	46	8	42	139	86	82	80	63	59	46	114	31	102
25773	NR_103779	chr1	152309543	152339168	+	FLG-AS1	Unmarked	2	0.75	7.666	0.821	63	102	40	50	96	181	79	70	38	64	16	20	57	80	3	40
25011	NM_001014342	chr1	152321212	152332482	-	FLG2	Unmarked	1	0.3	8.666	0.684	92	81	67	36	81	135	72	69	41	65	42	36	62	76	3	41
22138	NM_016190	chr1	152381718	152386750	-	CRNN	Unmarked	3	1.125	12	0.75	94	51	84	55	42	47	71	66	58	43	83	59	89	85	6	66
21413	NM_178438	chr1	152483319	152484653	+	LCE5A	Unmarked	3	1.125	12.666	0.927	74	60	90	33	44	78	87	62	80	58	96	47	59	75	8	48
22402	NM_019060	chr1	152486977	152488481	+	CRCT1	Unmarked	2	1	11.666	1.296	60	46	93	52	46	42	104	42	73	82	94	54	73	64	11	63
25786	NM_178435	chr1	152538174	152539229	-	LCE3E	Unmarked	1.667	0.625	7.666	1.15	83	62	94	55	45	50	73	57	71	43	74	57	95	70	4	66
25237	NM_032563	chr1	152551859	152552980	-	LCE3D	Unmarked	3	0.75	8.333	0.962	77	66	85	49	41	73	77	67	74	47	66	48	85	72	7	65
28049	NM_178434	chr1	152573137	152573562	+	LCE3C	Unmarked	0	0	0	0	63	51	82	37	26	55	87	73	55	54	83	69	89	81	9	85
27956	NM_178433	chr1	152586286	152586574	+	LCE3B	Unmarked	0	0	0.667	2.003	58	43	97	41	28	73	85	63	72	50	72	68	80	84	8	77
23593	NM_178431	chr1	152595309	152595579	-	LCE3A	Unmarked	5.333	2.286	10.333	1	42	28	92	36	20	59	84	59	63	52	77	93	73	83	32	106
25536	NM_178430	chr1	152635886	152637135	+	LCE2D	Unmarked	1	0.273	8	0.706	65	50	99	43	37	50	85	60	80	47	88	63	75	86	6	65
27186	NM_178429	chr1	152647790	152649049	+	LCE2C	Unmarked	2	2	5	0.6	68	47	94	41	37	54	90	59	76	54	98	61	68	85	7	60
25888	NM_014357	chr1	152658598	152659876	+	LCE2B	Unmarked	1	0.429	7.333	0.629	66	44	93	44	35	50	89	60	78	56	104	58	68	84	10	60
23487	NM_178428	chr1	152670839	152671918	+	LCE2A	Unmarked	2.667	0.533	10.666	0.865	72	71	85	39	56	85	82	58	74	48	83	49	65	78	4	50
23848	NM_178356	chr1	152681522	152681910	+	LCE4A	Unmarked	3.333	1.111	10	0.833	78	76	63	39	52	96	83	66	50	44	60	57	75	82	5	73
19978	NM_001024679	chr1	152691997	152692905	+	C1orf68	Unmarked	1.667	0.715	13.667	0.891	78	43	86	54	33	48	88	59	60	56	55	64	90	81	5	99
15168	NM_001025231	chr1	152730505	152734529	+	KPRP	Unmarked	2.333	0.7	17.333	1.405	70	57	97	48	52	72	74	53	83	49	84	50	67	74	10	59
21866	NM_178354	chr1	152748847	152749445	+	LCE1F	Unmarked	1.333	0.571	12.333	0.925	73	58	76	40	37	76	86	63	67	38	59	71	70	90	14	81
25149	NM_178353	chr1	152758752	152760901	+	LCE1E	Unmarked	1.666	0.555	8.333	0.806	82	37	102	58	31	41	72	48	78	41	107	60	88	73	5	76
27671	NM_178352	chr1	152769226	152770657	+	LCE1D	Unmarked	0	0	3.333	0.588	67	28	106	64	27	40	75	50	84	51	112	55	87	73	10	70
25322	NM_178351	chr1	152777310	152779107	-	LCE1C	Unmarked	1	0.231	8.333	0.595	69	45	109	70	42	63	62	60	83	42	74	50	98	77	4	51
23684	NM_178349	chr1	152784446	152785585	+	LCE1B	Unmarked	2.333	1	10.333	1.107	103	72	76	53	64	88	82	59	73	55	49	36	64	78	6	41
25585	NM_178348	chr1	152799948	152800573	+	LCE1A	Unmarked	1.667	1	8	0.857	69	45	82	39	41	67	85	63	56	47	61	78	69	98	13	86
21062	NM_001128600	chr1	152815329	152816459	+	LCE6A	Unmarked	1.333	0.364	13	0.848	82	61	95	54	49	50	68	63	81	41	75	48	80	78	7	67
19225	NM_030663	chr1	152850797	152857523	+	SMCP	Unmarked	4	1.091	14.333	0.956	70	80	85	47	59	90	76	60	79	49	72	36	74	66	3	53
19517	NM_005547	chr1	152881038	152884362	+	IVL	Unmarked	1.666	0.384	14	1.024	78	50	93	52	39	67	81	54	86	48	94	45	70	76	5	61
15189	NM_173080	chr1	152943127	152945069	+	SPRR4	Unmarked	2.333	0.437	17.333	1	81	63	68	39	45	100	78	75	56	49	69	49	69	85	9	64
9045	NM_001199828	chr1	152956563	152958290	+	SPRR1A	Unmarked	2.667	0.727	26	1.814	87	69	88	52	56	71	63	59	60	46	61	50	93	63	5	76
10516	NM_001097589	chr1	152974222	152976332	+	SPRR3	Unmarked	0.667	0.286	22.667	1.7	100	82	84	53	64	99	58	57	65	35	43	47	90	62	6	54
16284	NM_003125	chr1	153003678	153005376	+	SPRR1B	Unmarked	1.666	0.833	16.666	1.389	65	78	79	57	71	116	57	68	55	48	53	34	88	70	1	59
21551	NM_006945	chr1	153012200	153013594	-	SPRR2D	Unmarked	1.333	0.267	12.333	0.902	82	61	87	49	56	105	80	60	77	61	52	34	65	74	5	51
22652	NM_005988	chr1	153028595	153029988	-	SPRR2A	Unmarked	1.333	0.286	11.333	0.756	82	72	90	36	63	107	82	57	77	55	51	41	58	74	2	52
26089	NM_001017418	chr1	153042717	153044084	-	SPRR2B	Unmarked	2.667	0.667	7	0.488	78	71	81	38	56	108	89	52	73	58	64	43	62	67	4	55
20842	NM_001024209	chr1	153065610	153067001	-	SPRR2E	Unmarked	1.667	0.556	13	0.975	73	64	86	40	51	103	90	57	71	65	63	39	68	68	0	61
22475	NM_001014450	chr1	153084612	153085989	-	SPRR2F	Unmarked	1.666	0.454	11.666	0.7	97	63	86	38	57	112	82	50	73	62	62	39	56	65	6	51
24330	NR_003062	chr1	153112593	153113969	-	SPRR2C	Unmarked	1.333	0.235	9.666	0.569	76	63	91	48	52	113	75	55	82	49	55	39	68	70	4	59
21815	NM_001014291	chr1	153122057	153123427	-	SPRR2G	Unmarked	2.333	0.368	12.333	0.569	92	78	79	50	65	72	87	53	68	54	72	45	74	73	1	36
19132	NM_001010857	chr1	153175905	153177601	+	LELP1	Unmarked	0.667	0.133	14.333	0.796	98	57	87	45	39	71	77	60	69	54	83	44	81	65	3	66
12186	NM_001195571	chr1	153190059	153191793	+	PRR9	Unmarked	3.333	0.714	20.333	1.271	65	55	86	52	40	79	73	75	75	45	56	47	78	88	8	77
2979	NM_000427	chr1	153232178	153234600	+	LOR	H3K27me3-only	4	1.091	120.667	9.05	59	44	95	54	30	55	78	68	74	45	83	62	90	87	7	68
14195	NM_052891	chr1	153270337	153283194	-	PGLYRP3	Unmarked	1	0.214	18.333	0.948	62	69	79	41	62	112	83	52	58	61	65	54	69	66	11	55
10407	NM_020393	chr1	153302596	153321022	-	PGLYRP4	Unmarked	2.333	0.368	23	1.045	43	41	94	39	33	55	84	67	75	46	107	66	66	96	10	77
11427	NM_002965	chr1	153330329	153333503	+	S100A9	Unmarked	2	1.2	21.333	1.684	73	39	80	48	32	74	67	68	49	38	65	73	86	90	13	104
17506	NM_005621	chr1	153346183	153348075	-	S100A12	Unmarked	1.333	0.571	15.666	1.175	75	46	78	48	45	67	86	53	63	55	90	64	63	83	18	65
19254	NM_002964	chr1	153362507	153363664	-	S100A8	Unmarked	1	0.158	14.333	0.86	67	46	88	47	30	61	79	62	67	49	86	62	84	77	10	84
22878	NM_176823	chr1	153388999	153395701	+	S100A7A	Unmarked	1	0.333	11	0.846	57	35	75	55	24	50	88	72	66	51	89	51	75	98	6	107
13822	NM_001045479	chr1	153409470	153412503	-	S100A7L2	Unmarked	0.667	0.133	18.666	1.167	56	43	78	48	32	53	82	83	72	51	83	44	65	102	7	100
22400	NM_002963	chr1	153430219	153433137	-	S100A7	Unmarked	1.333	0.235	11.666	0.7	55	36	79	52	28	39	87	69	65	49	92	59	74	98	8	109
3660	NM_014624	chr1	153507075	153508717	-	S100A6	Bivalent	41.667	5.952	91.666	3.198	35	33	61	47	23	36	78	66	50	53	128	88	67	82	52	100
12835	NM_002962	chr1	153509622	153514241	-	S100A5	Unmarked	2	0.462	19.666	1.135	45	45	70	42	31	67	87	84	69	59	88	43	57	97	14	101
8392	NM_002961	chr1	153516097	153518282	-	S100A4	Unmarked	8.667	0.897	28	1.037	48	36	65	47	30	48	100	65	45	64	97	74	73	95	18	94
8474	NM_002960	chr1	153519808	153521734	-	S100A3	Unmarked	4.667	0.778	28	1.151	46	30	91	39	19	44	76	68	65	47	133	68	77	85	13	98
7958	NM_005978	chr1	153533584	153538306	-	S100A2	Unmarked	4.667	0.7	30	1.406	30	28	68	49	21	53	88	83	47	59	104	60	77	106	9	117
8081	NM_080388	chr1	153579366	153585514	-	S100A16	H3K4me3-only	25	3.948	29.333	1.354	35	21	112	32	20	45	81	46	82	53	159	73	63	73	15	89
9589	NM_020672	chr1	153586731	153588808	-	S100A14	Unmarked	3	0.474	24.666	0.961	38	30	95	35	26	34	89	72	63	62	103	73	71	94	14	100
7521	NM_005979	chr1	153591275	153600715	-	S100A13	Unmarked	3.333	0.385	32	1.011	27	25	72	44	14	46	94	85	60	56	108	59	67	112	9	121
7671	NM_001024211	chr1	153591275	153600117	-	S100A13	H3K4me3-only	81.667	9.074	31.333	1.056	26	30	80	38	14	43	86	84	75	53	117	62	60	100	24	107
7858	NM_001024212	chr1	153591275	153599744	-	S100A13	H3K4me3-only	111.333	10.775	30.333	1	42	25	99	54	14	37	70	64	95	44	113	62	69	79	32	100
7936	NM_001024213	chr1	153591275	153599524	-	S100A13	H3K4me3-only	107	10.355	30	0.968	45	29	92	55	15	40	76	66	92	42	99	58	69	86	24	111
12760	NM_001024210	chr1	153591275	153606568	-	S100A13	H3K4me3-only	268	24.364	19.666	0.766	42	26	55	43	31	58	56	74	36	57	93	90	58	77	72	131
7915	NM_006271	chr1	153600872	153604513	+	S100A1	Unmarked	2.666	0.333	30	0.947	44	18	111	52	11	29	66	62	80	46	115	62	90	75	11	127
13863	NM_001244664	chr1	153606457	153618782	+	CHTOP	H3K4me3-only	248	19.578	18.666	0.747	58	27	80	57	32	41	56	38	74	46	127	88	59	53	71	92
21344	NR_052019	chr1	153631129	153634328	+	SNAPIN	H3K4me3-only	180.667	36.133	12.666	0.691	51	27	62	40	33	100	61	64	48	56	117	79	47	75	61	78
14466	NM_001267809	chr1	153634263	153643504	-	ILF2	H3K4me3-only	287	41	18	0.871	73	52	70	42	50	78	66	60	64	64	96	58	50	59	50	67
2578	NM_000906	chr1	153651163	153666468	+	NPR1	Bivalent	141.667	17.001	146.667	6.197	27	12	52	60	11	36	47	87	46	31	109	102	67	102	79	131
19352	NM_023015	chr1	153700566	153746555	+	INTS3	H3K4me3-only	230.333	32.905	14.333	0.623	28	22	71	53	22	55	39	81	52	29	94	83	71	91	54	154
9223	NM_024330	chr1	153747767	153752633	+	SLC27A3	H3K4me3-only	221.667	31.667	25.666	0.939	43	23	73	39	22	43	72	45	64	31	124	118	48	85	68	101
12714	NM_020699	chr1	153777202	153895451	-	GATAD2B	H3K4me3-only	159.667	31.933	19.667	0.967	35	25	64	31	22	44	57	59	58	54	107	100	39	59	92	153
12132	NM_014856	chr1	153901976	153919154	-	DENND4B	H3K4me3-only	174.333	24.905	20.333	0.709	25	12	68	39	14	26	54	52	49	38	159	124	55	70	89	125
16769	NM_181715	chr1	153920147	153931132	-	CRTC2	H3K4me3-only	185	29.212	16.333	0.662	35	23	83	34	23	67	55	66	77	50	138	83	41	70	72	82
11568	NM_001271957	chr1	153931574	153935844	-	SLC39A1	H3K4me3-only	293	35.161	21	0.829	33	33	63	39	26	48	59	89	54	47	101	77	54	94	57	125
11830	NM_001271959	chr1	153931574	153935968	-	SLC39A1	H3K4me3-only	297	37.125	20.667	0.827	31	30	64	39	21	51	60	84	58	42	109	82	55	92	58	123
12547	NM_001271961	chr1	153931574	153936117	-	SLC39A1	H3K4me3-only	307	35.422	20	0.857	37	32	66	36	18	53	66	83	62	45	100	82	55	90	56	118
15170	NM_014437	chr1	153931574	153940208	-	SLC39A1	H3K4me3-only	177	13.973	17.333	0.684	49	28	88	39	29	64	58	62	66	51	100	89	60	70	59	87
16543	NM_001271960	chr1	153931574	153940660	-	SLC39A1	H3K4me3-only	128	13.715	16.333	0.636	50	31	88	47	37	58	57	70	62	47	80	69	66	87	33	117
15662	NM_130898	chr1	153940314	153946840	+	CREB3L4	H3K4me3-only	156.667	13.056	17	0.654	71	28	75	47	32	54	64	64	62	44	97	81	56	89	48	87
17072	NM_001255981	chr1	153940674	153946840	+	CREB3L4	H3K4me3-only	126.667	13.103	16	0.623	58	30	87	47	37	49	67	62	71	48	120	68	56	88	33	78
14320	NM_006694	chr1	153946744	153950451	-	JTB	H3K4me3-only	280.667	28.067	18	0.844	62	46	89	59	37	55	46	59	85	34	76	77	72	62	62	78
17970	NM_001272038	chr1	153954092	153957842	-	RAB13	H3K4me3-only	163.333	20.417	15.333	0.719	77	46	73	43	43	79	64	91	57	48	67	40	62	103	8	98
20630	NR_073553	chr1	153954092	153958853	-	RAB13	H3K4me3-only	147.333	40.178	13.333	0.635	69	30	60	50	37	70	52	89	49	37	75	60	54	111	35	121
17073	NM_001030	chr1	153963238	153964631	+	RPS27	H3K4me3-only	251.667	29.037	16	0.762	72	52	65	52	43	65	67	70	63	49	76	62	62	79	42	80
20879	NM_207308	chr1	153965167	154127592	-	NUP210L	Unmarked	3.333	0.588	13	0.848	64	37	70	44	37	85	98	46	63	75	90	66	51	69	35	69
16733	NM_001043352	chr1	154127779	154155725	-	TPM3	H3K4me3-only	259.667	37.095	16.333	0.875	41	28	105	43	27	48	66	38	92	53	144	83	57	50	58	66
21719	NM_001278191	chr1	154127779	154150697	-	TPM3	Unmarked	9	1.35	12.333	0.661	53	52	79	30	50	114	96	73	57	72	58	51	53	96	5	60
8927	NM_152263	chr1	154134288	154164611	-	TPM3	Unmarked	4	0.522	26.333	1.463	85	49	93	49	29	62	79	70	84	46	70	47	79	83	4	70
9032	NR_103460	chr1	154159733	154164543	-	TPM3	Unmarked	4.333	0.619	26	1.444	90	47	98	50	32	61	72	71	82	45	70	48	82	82	5	64
7361	NR_030600	chr1	154166140	154166219	-	MIR190B	Unmarked	1	0.3	32.667	1.508	52	47	81	36	40	77	83	77	70	52	81	52	54	102	10	85
25562	NM_001010979	chr1	154171561	154178841	-	C1orf189	Unmarked	3	0.529	8	0.5	97	72	72	53	71	71	82	53	63	61	73	37	63	72	7	52
17481	NM_138740	chr1	154179182	154193273	-	C1orf43	H3K4me3-only	260.667	31.281	15.666	0.61	37	21	44	50	21	32	51	68	45	42	120	107	49	77	99	136
17178	NM_001127320	chr1	154192654	154235980	+	UBAP2L	H3K4me3-only	385.333	46.242	16	0.593	91	39	84	54	39	54	53	55	65	47	95	68	73	60	43	79
17695	NM_014847	chr1	154193324	154243329	+	UBAP2L	H3K4me3-only	254.333	33.172	15.666	0.618	30	19	81	40	21	38	49	41	70	48	138	111	49	44	100	120
19964	NM_006118	chr1	154245038	154248355	+	HAX1	H3K4me3-only	284.667	38.82	13.667	0.745	72	31	80	47	31	64	56	77	70	60	101	58	57	73	52	70
10960	NM_080429	chr1	154293591	154297801	+	AQP10	Unmarked	1	0.3	22	2.276	66	55	76	39	52	96	78	81	55	60	72	49	63	96	10	51
10127	NM_001005855	chr1	154298035	154310322	+	ATP8B2	H3K4me3-only	255	47.815	23.333	0.875	34	22	93	29	15	32	50	41	86	35	159	110	42	49	88	114
10567	NM_020452	chr1	154300275	154323780	+	ATP8B2	H3K4me3-only	21.667	4.063	22.666	0.971	55	35	96	35	27	48	83	53	76	49	140	61	63	79	6	93
1742	NM_181359	chr1	154377668	154441926	+	IL6R	Bivalent	69	7.393	227	9.08	41	26	69	44	19	35	76	56	64	47	100	103	55	78	69	117
530	NM_001010846	chr1	154451953	154474526	-	SHE	Bivalent	49	8.647	541.334	25.778	31	9	66	31	3	8	48	55	52	37	153	140	51	60	116	139
541	NM_001098475	chr1	154474694	154520623	+	TDRD10	Bivalent	41	8.2	533	27.569	10	7	63	41	2	21	41	49	57	26	140	149	52	59	128	154
15942	NM_017582	chr1	154521050	154531120	-	UBE2Q1	H3K4me3-only	140.667	28.133	17	0.689	20	16	84	35	4	15	42	40	70	25	203	140	62	45	108	90
6673	NM_000748	chr1	154540256	154552353	+	CHRNB2	H3K4me3-only	113	19.944	37.333	2	44	15	72	53	28	50	45	64	51	28	95	95	61	94	58	146
19841	NM_001025107	chr1	154554533	154600456	-	ADAR	H3K4me3-only	227.333	34.098	14	0.7	76	43	65	48	46	59	69	47	48	63	103	80	62	55	57	78
20636	NM_015841	chr1	154554533	154580724	-	ADAR	H3K4me3-only	299.333	56.128	13.333	0.69	82	22	64	33	25	66	86	47	53	79	100	94	41	57	76	74
21479	NM_001193495	chr1	154554533	154578776	-	ADAR	Unmarked	7.667	1.917	12.666	0.576	99	79	67	51	65	97	69	57	64	41	54	47	68	70	17	54
5550	NM_002249	chr1	154669941	154842754	-	KCNN3	H3K4me3-only	26	3	48.667	1.825	43	34	94	42	27	40	70	55	67	36	100	89	76	81	29	116
9285	NM_170782	chr1	154669941	154832338	-	KCNN3	Unmarked	1.333	0.21	25.333	1.118	53	36	98	45	29	66	97	40	73	54	98	79	77	76	11	67
8261	NM_006556	chr1	154897207	154909484	-	PMVK	H3K4me3-only	218.667	23.429	28.667	1.062	48	32	68	41	24	63	62	71	60	60	110	87	57	65	77	74
13583	NM_020524	chr1	154916558	154928567	-	PBXIP1	H3K4me3-only	137.667	29.498	19	0.77	77	32	93	36	34	90	64	63	74	50	107	54	53	80	20	72
16458	NM_138300	chr1	154929501	154934258	-	PYGO2	H3K4me3-only	274	74.72	16.333	0.942	16	11	61	26	10	31	68	52	46	58	158	129	42	61	104	126
10756	NM_001202859	chr1	154934773	154946959	-	SHC1	H3K4me3-only	278.333	33.401	22.333	0.859	47	31	52	58	35	80	47	79	49	49	63	73	58	80	72	126
15114	NM_183001	chr1	154934773	154943223	-	SHC1	H3K4me3-only	133.667	14.852	17.333	0.743	24	26	69	33	19	46	73	80	53	39	132	70	55	107	21	152
11708	NR_024163	chr1	154947117	154951725	+	CKS1B	H3K4me3-only	274.667	37.456	21	0.808	71	34	82	52	37	54	62	50	79	57	103	76	52	59	67	64
15584	NR_036212	chr1	154948168	154948259	+	MIR4258	H3K4me3-only	297	34.268	17	0.689	102	43	79	64	54	57	72	38	81	53	104	47	51	68	31	55
15826	NM_001184892	chr1	154955769	154961488	+	FLAD1	H3K4me3-only	254.667	38.198	17	0.823	107	41	102	58	50	54	45	49	81	46	87	51	70	57	31	70
14592	NM_018655	chr1	154966061	154966791	+	LENEP	Unmarked	2.667	0.308	18	0.915	53	32	88	43	27	33	84	65	58	41	97	84	78	103	10	103
11035	NR_049765	chr1	154975105	154991001	+	ZBTB7B	H3K4me3-only	162.667	30.502	22	0.786	43	16	112	41	17	34	60	31	98	43	205	77	54	49	46	73
8757	NM_144622	chr1	154991002	155006257	-	DCST2	Unmarked	2	0.545	27	1.8	36	34	96	34	27	57	92	57	80	54	136	70	56	88	16	66
8810	NM_152494	chr1	155006281	155023406	+	DCST1	Unmarked	1.667	0.5	26.667	1.739	54	35	87	52	26	35	56	86	55	33	68	70	92	100	16	134
3297	NR_040772	chr1	155017667	155023641	-	LOC100505666	Bivalent	173.667	28.945	106	4.184	18	10	74	47	16	23	32	55	42	35	108	140	73	58	111	157
6713	NR_040773	chr1	155017667	155036467	-	LOC100505666	H3K4me3-only	236.333	54.543	37	1.708	50	17	104	41	19	30	43	50	75	38	113	107	69	57	72	114
3293	NR_048578	chr1	155023747	155035252	+	ADAM15	Bivalent	171.333	34.267	106.333	4.143	24	13	60	33	16	21	64	50	52	42	156	135	38	76	105	114
6337	NM_005227	chr1	155036212	155042029	+	EFNA4	H3K4me3-only	204.667	43.854	40	1.622	46	20	62	41	26	47	64	59	47	43	115	107	49	86	72	115
1065	NM_004952	chr1	155051347	155060014	+	EFNA3	Bivalent	80.333	17.213	343.667	16.365	35	19	78	35	14	25	62	59	70	40	173	100	48	76	70	95
788	NM_182685	chr1	155100348	155107386	+	EFNA1	Bivalent	105.667	16.685	421.333	15.8	33	22	74	45	18	26	56	66	55	36	104	110	68	81	72	133
11942	NM_001122837	chr1	155108287	155111334	+	SLC50A1	H3K4me3-only	293.667	28.42	20.666	0.681	44	23	89	42	20	37	61	52	82	52	169	84	52	58	69	65
13898	NM_153741	chr1	155112366	155112996	-	DPM3	H3K4me3-only	270.333	23.171	18.666	0.848	75	35	78	41	27	51	77	48	75	47	108	83	51	70	50	83
14345	NM_018973	chr1	155112366	155112883	-	DPM3	H3K4me3-only	296.333	26.148	18	0.857	46	37	77	41	30	54	75	47	74	42	111	89	52	73	53	98
8666	NM_173852	chr1	155141883	155145804	-	KRTCAP2	H3K4me3-only	235	22.031	27.333	0.891	42	36	78	39	29	56	64	57	76	58	151	71	48	56	63	75
8128	NR_046328	chr1	155146262	155157447	+	TRIM46	H3K4me3-only	180.333	22.542	29.333	0.917	45	46	66	43	34	44	63	69	56	48	113	79	65	73	53	102
7632	NR_046329	chr1	155147229	155157447	+	TRIM46	H3K4me3-only	147	19.176	31.333	1.011	41	27	93	32	13	28	85	36	83	44	175	88	55	63	38	98
8574	NM_001204287	chr1	155158299	155162706	-	MUC1	H3K4me3-only	37	6.938	27.334	1.547	42	17	105	38	32	41	71	41	73	55	151	73	55	72	25	108
8208	NR_030281	chr1	155164967	155165063	+	MIR92B	H3K4me3-only	241.333	65.812	29	1.16	48	26	48	45	22	45	41	73	39	35	101	100	58	75	84	159
6826	NM_001252607	chr1	155165378	155177772	-	THBS3	H3K4me3-only	64.667	7.462	36	1.137	42	35	94	33	23	52	74	65	68	38	101	80	71	89	19	115
6830	NM_198883	chr1	155178489	155183624	+	MTX1	H3K4me3-only	148.667	27.877	36	1.213	46	20	86	46	16	31	57	44	65	41	121	103	70	56	66	131
8780	NR_002188	chr1	155183615	155197325	-	GBAP1	H3K4me3-only	218.667	25.23	27	1.012	46	50	59	42	29	80	75	65	63	44	96	81	58	75	55	81
4776	NM_001171811	chr1	155204238	155214653	-	GBA	H3K4me3-only	125.333	11.75	61	2.577	44	39	60	42	31	67	61	100	51	48	86	77	58	106	55	74
14179	NM_000157	chr1	155204238	155211069	-	GBA	H3K4me3-only	28	12.002	18.333	1.222	55	66	72	39	45	84	85	77	61	57	69	47	72	84	7	79
14203	NM_001171812	chr1	155204238	155211066	-	GBA	H3K4me3-only	28.333	12.144	18.333	1.222	55	66	73	39	44	84	85	77	62	57	70	46	72	83	7	79
7985	NM_198264	chr1	155216995	155225274	-	FAM189B	H3K4me3-only	185.333	39.711	29.667	1.483	29	25	68	46	18	24	48	64	70	34	119	87	51	71	75	170
12097	NM_005698	chr1	155225769	155232176	-	SCAMP3	H3K4me3-only	159.667	20.825	20.333	0.938	44	36	80	45	30	63	81	50	75	62	127	70	56	62	47	71
23281	NM_003993	chr1	155232658	155243281	-	CLK2	H3K4me3-only	182.667	36.533	10.666	0.914	46	25	82	48	25	42	59	39	82	50	156	93	48	48	85	71
7255	NM_020897	chr1	155247217	155259639	+	HCN3	H3K4me3-only	116.667	15.91	33.333	1.149	43	28	79	39	21	41	46	65	61	35	109	101	64	69	72	126
11714	NM_000298	chr1	155259083	155271225	-	PKLR	Unmarked	3.333	0.769	21	2.173	75	55	89	47	37	49	71	64	70	51	93	50	84	66	11	87
13790	NM_181871	chr1	155259083	155270792	-	PKLR	Unmarked	3.333	0.833	18.666	2.333	49	43	101	44	35	40	78	60	77	60	124	55	77	70	12	74
13028	NM_001242825	chr1	155278538	155290457	+	FDPS	H3K4me3-only	271.667	23.971	19.333	0.682	45	40	80	54	40	60	61	65	67	50	71	77	67	75	53	94
13594	NM_001135821	chr1	155278704	155290457	+	FDPS	H3K4me3-only	353	26.476	19	0.62	41	40	76	51	38	59	65	66	66	48	81	79	63	80	52	94
7822	NM_001039517	chr1	155290250	155293938	-	RUSC1-AS1	H3K4me3-only	229.333	29.912	30.666	1.07	46	12	84	44	17	15	49	39	71	33	181	102	52	60	73	121
5662	NM_001105204	chr1	155290639	155300909	+	RUSC1	H3K4me3-only	84.333	9.37	47	1.808	52	33	84	40	24	38	71	52	72	43	127	89	61	71	49	93
7221	NM_001278227	chr1	155293727	155300909	+	RUSC1	H3K4me3-only	212.333	24.502	33.666	1.188	14	10	56	28	15	49	59	73	35	46	111	110	44	91	76	182
10070	NM_001278230	chr1	155294185	155300909	+	RUSC1	H3K4me3-only	303.333	33.704	23.666	0.807	17	13	63	34	18	50	61	76	45	57	128	88	47	84	67	151
19143	NM_018489	chr1	155305051	155532324	-	ASH1L	H3K4me3-only	311.333	62.267	14.333	1.075	20	13	70	35	12	37	60	55	73	44	162	112	34	70	99	103
22920	NR_030282	chr1	155316140	155316236	-	MIR555	Unmarked	1.333	0.308	11	0.589	78	72	70	46	83	101	73	60	48	61	58	44	57	83	10	55
22558	NR_034180	chr1	155402970	155404053	+	POU5F1P4	Unmarked	3.333	1	11.333	1	72	47	77	45	35	60	76	53	68	42	93	68	66	74	26	97
20184	NR_027023	chr1	155531771	155533735	+	ASH1L-AS1	H3K4me3-only	164.333	123.281	13.666	1.079	72	36	69	76	31	30	40	71	63	31	96	68	87	74	53	102
25649	NM_001256532	chr1	155579960	155584758	+	MSTO1	H3K4me3-only	100	21.427	7.667	0.821	35	37	91	45	36	43	53	48	75	46	96	99	62	54	77	102
17841	NM_001198904	chr1	155629232	155658447	-	YY1AP1	H3K4me3-only	388.333	52.957	15.333	1.15	29	13	74	38	13	31	62	52	72	48	149	117	40	65	101	95
18300	NM_139119	chr1	155629232	155658565	-	YY1AP1	H3K4me3-only	382	49.824	15	1.098	29	12	75	42	16	25	62	51	73	56	150	111	40	61	103	93
18369	NM_001198902	chr1	155629232	155658515	-	YY1AP1	H3K4me3-only	386	50.352	15	1.098	29	13	75	40	15	32	62	51	72	54	146	111	41	62	100	96
18460	NM_001198905	chr1	155629232	155658568	-	YY1AP1	H3K4me3-only	381.333	49.737	15	1.098	29	12	76	42	16	24	61	51	74	55	151	111	40	61	103	93
18774	NM_139118	chr1	155629232	155658823	-	YY1AP1	H3K4me3-only	310.333	51.722	14.666	0.936	54	22	76	52	16	22	55	59	73	53	132	90	60	56	85	94
18923	NM_001198901	chr1	155629232	155658819	-	YY1AP1	H3K4me3-only	310.667	51.778	14.666	0.936	53	22	75	51	16	23	56	59	72	54	133	90	60	56	85	94
18988	NM_139121	chr1	155629232	155658764	-	YY1AP1	H3K4me3-only	344.667	54.424	14.666	0.936	47	18	75	53	18	20	56	55	71	57	135	96	57	54	93	94
25717	NM_001198899	chr1	155629232	155649620	-	YY1AP1	Unmarked	0.333	0.167	7.666	0.548	87	58	78	47	57	125	71	63	62	48	47	43	64	84	4	61
18823	NM_001199850	chr1	155658881	155708800	+	DAP3	H3K4me3-only	282.333	56.467	14.666	0.936	31	25	59	49	21	62	61	72	57	55	92	86	55	74	78	122
18815	NM_004632	chr1	155658884	155708800	+	DAP3	H3K4me3-only	282	56.4	14.666	0.936	32	25	59	49	21	62	61	71	57	55	92	86	56	73	78	122
21572	NM_032292	chr1	155734575	155826972	-	GON4L	H3K4me3-only	235.333	28.241	12.333	0.561	52	37	62	37	38	90	83	60	53	66	96	76	45	77	50	77
18047	NM_152280	chr1	155829259	155854990	+	SYT11	H3K4me3-only	32.667	5.764	15.333	0.667	74	48	87	45	42	68	57	66	70	48	78	66	68	69	40	73
20853	NM_006912	chr1	155867598	155881193	-	RIT1	H3K4me3-only	167.667	26.475	13	0.696	53	32	77	40	39	87	77	58	67	78	125	47	42	64	39	74
22151	NM_001256821	chr1	155867598	155880706	-	RIT1	H3K4me3-only	215.333	24.845	12	0.706	55	45	79	40	38	71	80	56	74	65	118	56	53	64	36	69
19647	NM_014949	chr1	155882835	155904188	-	KIAA0907	H3K4me3-only	315.667	32.654	14	0.712	95	50	95	42	50	66	52	41	91	50	120	59	47	42	53	46
22909	NR_002974	chr1	155889699	155889833	-	SNORA42	Unmarked	1.333	0.666	11	0.767	59	72	66	44	64	104	78	61	52	53	59	56	66	78	17	70
25446	NR_003005	chr1	155895748	155895877	-	SCARNA4	Unmarked	1.667	0.294	8	0.5	95	72	79	53	57	87	81	46	73	52	67	44	74	60	10	49
9377	NM_181885	chr1	155911479	155912625	+	RXFP4	Unmarked	4.333	0.65	25	1.056	22	32	53	54	20	50	90	79	43	36	96	86	76	122	22	118
12202	NM_004723	chr1	155916629	155947966	-	ARHGEF2	H3K4me3-only	346	129.734	20.333	0.953	33	16	50	43	9	33	55	74	62	51	150	84	37	72	92	138
13755	NM_001162383	chr1	155916629	155948336	-	ARHGEF2	H3K4me3-only	262	65.5	18.666	0.889	53	15	73	34	17	27	51	59	79	42	169	88	27	70	85	110
11834	NM_003145	chr1	155978838	155990758	-	SSR2	H3K4me3-only	182.667	36.533	20.667	0.925	83	36	95	46	39	45	60	49	84	49	122	66	54	63	44	64
13337	NM_020131	chr1	156005091	156023516	-	UBQLN4	H3K4me3-only	139	34.75	19	1.018	26	10	97	24	8	22	52	30	95	40	237	103	28	40	89	98
11341	NM_001145264	chr1	156024516	156028301	+	LAMTOR2	H3K4me3-only	331	52.266	21.333	1.032	60	30	76	49	30	52	61	46	67	48	122	83	58	58	61	98
10252	NM_020387	chr1	156030965	156040295	+	RAB25	H3K4me3-only	87.333	11.91	23.333	1.014	44	33	84	40	22	67	71	78	65	45	78	65	70	94	20	123
14635	NM_001093725	chr1	156041803	156051789	-	MEX3A	H3K4me3-only	253.667	95.149	18	0.982	28	16	66	35	17	47	45	70	55	31	139	96	45	85	70	154
15383	NR_047544	chr1	156052368	156107657	+	LMNA	H3K4me3-only	124	33.815	17.333	0.897	49	20	79	24	18	32	46	58	72	33	169	90	34	69	69	137
6740	NM_170708	chr1	156084460	156109880	+	LMNA	H3K4me3-only	167	14.314	36.667	1.183	21	17	78	54	13	30	58	61	66	33	92	102	71	82	65	156
21247	NR_047545	chr1	156095950	156107657	+	LMNA	Unmarked	4	0.545	12.667	0.528	75	43	74	41	36	48	80	53	56	41	106	76	66	85	18	101
9207	NM_001193301	chr1	156119734	156147542	+	SEMA4A	H3K4me3-only	23.333	3.182	25.666	0.917	43	37	95	45	34	33	87	40	84	57	161	65	59	67	23	69
13837	NM_001193300	chr1	156123321	156147542	+	SEMA4A	Unmarked	2.666	0.444	18.666	0.862	56	42	93	38	33	60	84	48	85	46	117	59	55	77	13	93
14180	NM_001193302	chr1	156123368	156147542	+	SEMA4A	Unmarked	2.333	0.437	18.333	0.846	56	40	97	40	34	54	82	47	86	47	113	60	58	76	13	96
17512	NM_014655	chr1	156163729	156182587	+	SLC25A44	H3K4me3-only	178	26.699	15.666	0.77	63	42	77	51	31	63	52	68	73	47	91	76	67	62	66	70
19020	NM_001199653	chr1	156182778	156209868	+	PMF1	H3K4me3-only	213	27.781	14.666	0.557	68	41	67	49	34	81	64	56	72	49	102	70	50	65	60	71
19066	NM_001199664	chr1	156182778	156213123	+	PMF1-BGLAP	H3K4me3-only	213	27.781	14.666	0.557	68	41	67	49	34	81	64	56	72	49	102	70	50	65	60	71
18114	NM_199173	chr1	156211950	156213123	+	BGLAP	Unmarked	2	0.462	15.333	0.73	23	29	95	37	14	39	78	58	65	36	110	95	81	85	23	131
11063	NM_001272112	chr1	156213111	156217908	-	PAQR6	Unmarked	5.333	0.889	22	1.245	44	30	79	45	24	40	79	58	52	37	120	85	77	94	16	119
11737	NM_015327	chr1	156219014	156252620	-	SMG5	H3K4me3-only	238	35.698	21	0.913	57	24	90	37	25	56	67	36	74	53	159	91	52	52	60	66
11310	NR_026678	chr1	156252703	156262234	+	TMEM79	H3K4me3-only	223.333	31.905	21.666	0.915	54	30	53	51	28	62	53	75	37	37	63	91	69	89	59	148
14228	NM_032323	chr1	156254069	156262234	+	TMEM79	Unmarked	11.667	1.522	18.333	0.724	65	54	98	44	41	71	72	65	80	48	82	51	75	77	8	68
19099	NM_001256605	chr1	156262477	156265480	-	C1orf85	H3K4me3-only	122.333	14.681	14.333	0.741	72	45	64	48	39	97	95	46	64	68	97	49	54	66	22	73
22423	NM_001004319	chr1	156268414	156269428	-	VHLL	Unmarked	1.666	1.666	11.666	1.061	40	51	65	42	41	106	78	73	49	58	86	57	68	82	21	82
18972	NM_005998	chr1	156278751	156308206	-	CCT3	H3K4me3-only	302.667	34.922	14.666	0.687	47	24	61	48	27	62	77	79	44	65	61	86	62	94	57	105
19284	NM_144627	chr1	156307104	156316785	+	TSACC	H3K4me3-only	178	41.08	14.333	0.662	134	56	83	67	64	61	49	44	75	42	79	46	66	59	32	42
3788	NM_001256395	chr1	156338979	156355013	+	RHBG	Bivalent	65.333	13.067	86.333	3.866	41	31	61	51	32	58	71	55	47	50	100	88	64	78	53	119
790	NM_006365	chr1	156374054	156399184	-	C1orf61	H3K27me3-only	10	2.5	420.333	22.123	60	36	102	43	30	46	60	67	72	42	105	63	80	79	15	99
822	NR_029691	chr1	156390132	156390221	-	MIR9-1	Bivalent	43.333	6.5	412.333	18.742	36	26	77	38	19	55	61	76	68	52	125	79	54	78	61	94
7935	NM_005920	chr1	156433512	156470634	-	MEF2D	H3K4me3-only	190.667	52.01	30	1.552	27	14	60	37	18	36	46	55	50	36	135	110	43	69	89	174
9757	NM_001271629	chr1	156433512	156460391	-	MEF2D	H3K4me3-only	14	3	24.333	1	44	19	118	37	24	33	81	34	96	44	153	76	54	75	17	94
11598	NM_178229	chr1	156495196	156542396	-	IQGAP3	H3K4me3-only	179.333	24.456	21	0.969	55	37	81	48	33	45	70	58	70	48	117	81	63	76	48	69
11454	NM_001105669	chr1	156549518	156556562	+	TTC24	Unmarked	2.333	0.778	21.333	2	76	36	103	40	37	59	77	53	83	50	104	60	59	82	12	68
12933	NM_144772	chr1	156561557	156564091	+	APOA1BP	H3K4me3-only	219.667	32.948	19.333	0.817	49	32	72	50	35	33	67	47	55	47	130	104	64	69	68	77
19654	NM_182679	chr1	156564099	156571279	-	GPATCH4	H3K4me3-only	337.667	48.238	14	0.724	84	41	78	51	41	62	62	64	68	52	84	64	61	74	44	69
5477	NM_021817	chr1	156589085	156595517	+	HAPLN2	Unmarked	9.667	0.906	49.666	2.129	77	60	83	38	31	80	64	83	74	42	72	42	75	76	11	91
1700	NM_198427	chr1	156611739	156623264	+	BCAN	Bivalent	70.667	13.251	232.333	9.548	35	19	72	42	15	47	51	81	53	36	86	96	64	92	62	148
5407	NM_006617	chr1	156638555	156647189	-	NES	H3K4me3-only	144	18.782	50.333	1.819	39	35	70	43	18	47	59	79	65	37	94	93	65	84	66	105
3888	NM_001878	chr1	156669399	156675459	-	CRABP2	Bivalent	160.333	30.064	83	3.037	46	24	72	46	19	32	57	62	61	50	139	87	62	64	68	110
3960	NM_001199723	chr1	156669399	156675608	-	CRABP2	H3K4me3-only	134	23.646	80	2.963	40	23	78	40	22	35	57	63	60	51	135	89	59	67	66	114
11100	NM_030980	chr1	156692412	156697705	-	ISG20L2	H3K4me3-only	289.333	34.721	21.667	0.644	63	55	73	46	46	77	63	78	70	42	65	53	59	89	29	91
12271	NM_001142560	chr1	156698262	156706752	+	RRNAD1	H3K4me3-only	315.333	29.562	20.333	0.61	50	34	72	57	34	29	53	61	68	51	108	88	60	63	82	89
12389	NM_145729	chr1	156707093	156710923	-	MRPL24	H3K4me3-only	202.333	19.581	20	1.017	52	35	80	46	24	69	73	53	76	40	103	80	62	74	43	89
13546	NM_004494	chr1	156711898	156721543	-	HDGF	H3K4me3-only	331.667	52.371	19	0.648	34	17	67	45	12	19	42	34	62	34	159	141	56	36	128	113
14719	NM_001126051	chr1	156711898	156722024	-	HDGF	H3K4me3-only	314.333	32.516	17.667	0.654	57	31	77	45	35	52	48	58	56	50	114	91	62	60	72	91
15160	NM_001126050	chr1	156711898	156722240	-	HDGF	H3K4me3-only	309.333	26.513	17.333	0.658	74	50	71	52	53	68	53	57	54	49	83	72	66	63	51	83
15974	NM_005973	chr1	156737273	156770609	+	PRCC	H3K4me3-only	278	25.273	16.667	0.581	41	28	70	30	32	73	63	75	50	55	87	88	47	86	60	114
2594	NM_001161443	chr1	156776034	156785939	-	SH2D2A	H3K27me3-only	2.667	0.381	145	5.37	40	31	96	48	12	32	73	70	81	33	88	73	83	91	17	131
3664	NM_003975	chr1	156776034	156786640	-	SH2D2A	H3K27me3-only	3.333	0.435	91.333	3.859	55	44	113	45	24	38	73	54	102	40	92	54	75	67	11	112
2430	NM_001007792	chr1	156785541	156851642	+	NTRK1	H3K27me3-only	3.333	0.526	157.667	5.565	42	37	90	42	21	53	80	78	76	44	102	68	73	98	17	78
519	NM_014215	chr1	156810664	156828712	-	INSRR	Bivalent	23.667	3.227	552.667	23.686	27	22	58	38	13	48	87	82	52	47	109	84	53	114	38	127
326	NM_001012331	chr1	156830670	156851642	+	NTRK1	Bivalent	50.333	7.55	697.334	34.296	24	22	71	38	19	35	73	45	57	29	137	136	55	85	78	95
1706	NM_001080471	chr1	156863522	156886226	+	PEAR1	Bivalent	30.667	8.365	231.667	11.983	34	21	80	35	17	30	65	62	72	46	120	79	47	78	51	162
463	NM_144702	chr1	156890423	156902880	+	LRRC71	Bivalent	53.667	4.6	585	23.092	23	23	56	45	23	40	54	80	56	38	86	93	46	96	77	163
16682	NM_198236	chr1	156904631	157015162	-	ARHGEF11	H3K4me3-only	196.667	73.741	16.333	0.766	88	46	91	27	34	92	46	41	89	36	121	82	40	39	70	57
11746	NR_030527	chr1	156905922	156906036	-	MIR765	Unmarked	1.667	0.385	21	1.167	54	45	84	54	42	77	64	67	66	45	84	55	75	84	18	85
20625	NM_001004341	chr1	157061834	157069600	-	ETV3L	Unmarked	2	0.667	13.333	0.784	76	42	70	35	31	61	60	88	53	34	77	62	64	103	19	124
16161	NM_001145312	chr1	157094458	157108383	-	ETV3	H3K4me3-only	233.333	49.996	16.666	0.794	33	18	72	32	9	24	64	53	77	53	157	102	37	55	96	117
25663	NR_001560	chr1	157098153	157098463	+	CYCSP52	Unmarked	2	0.429	7.667	0.59	110	74	85	50	52	84	78	53	88	46	62	37	69	63	8	40
16340	NM_005240	chr1	157102975	157108177	-	ETV3	H3K4me3-only	300.333	60.067	16.666	0.833	27	13	76	35	6	15	71	45	82	55	167	107	36	55	97	112
25487	NM_031281	chr1	157483166	157522310	-	FCRL5	Unmarked	3	0.9	8	0.545	83	72	55	49	62	139	70	78	48	52	55	31	66	86	6	47
21801	NM_031282	chr1	157543538	157567870	-	FCRL4	Unmarked	1	0.273	12.333	0.617	69	72	82	34	46	103	88	71	78	47	55	49	64	87	4	50
20610	NM_052939	chr1	157647977	157670647	-	FCRL3	Unmarked	1	0.273	13.333	0.667	113	63	77	54	57	83	75	49	73	40	64	50	64	78	11	48
25459	NM_030764	chr1	157715522	157746922	-	FCRL2	Unmarked	2.333	0.778	8	0.48	81	91	70	43	69	97	84	63	59	49	48	48	77	76	2	42
15739	NM_001159398	chr1	157764193	157789940	-	FCRL1	Unmarked	1.333	0.286	17	1.041	95	76	73	44	58	81	80	77	66	52	50	42	69	88	7	41
18315	NM_005894	chr1	157800703	157811634	-	CD5L	Unmarked	0.667	0.118	15	0.978	57	68	61	43	59	129	78	71	49	41	51	55	64	99	7	67
5471	NM_018240	chr1	157963062	158065844	+	KIRREL	H3K4me3-only	118.666	23.733	49.667	1.817	48	34	88	44	27	49	47	61	74	42	136	72	65	59	53	100
12041	NR_033946	chr1	158101833	158110430	-	LOC646268	Unmarked	3	0.375	20.333	1.07	42	54	71	52	45	89	91	77	53	62	44	54	79	97	8	81
1420	NM_001766	chr1	158149736	158156216	+	CD1D	H3K27me3-only	7	1	275	11.786	75	49	130	43	46	64	72	40	111	54	101	48	65	55	11	35
22395	NM_001763	chr1	158223926	158228058	+	CD1A	Unmarked	0.667	0.2	11.666	0.972	102	67	100	37	58	125	79	44	83	72	70	30	63	43	5	21
16628	NM_001765	chr1	158259562	158264564	+	CD1C	Unmarked	1	0.167	16.333	0.636	110	74	107	37	57	72	87	44	103	54	71	41	58	59	5	20
19674	NM_001764	chr1	158297739	158301321	-	CD1B	Unmarked	2.333	0.538	14	0.913	98	49	99	54	45	76	65	61	73	47	88	47	83	76	3	35
24898	NM_001185112	chr1	158323485	158327343	+	CD1E	Unmarked	1.333	0.308	8.667	0.591	60	47	119	44	42	63	72	58	92	50	91	55	76	75	6	49
24826	NM_001004475	chr1	158368311	158369256	-	OR10T2	Unmarked	1	0.231	9	0.491	82	85	53	52	62	120	74	79	48	48	46	38	80	83	6	43
21503	NM_001004476	chr1	158389717	158390656	-	OR10K2	Unmarked	3	0.643	12.666	0.905	69	72	62	46	42	91	99	75	72	48	55	49	66	96	7	50
25146	NM_001004473	chr1	158435351	158436293	+	OR10K1	Unmarked	2.333	0.778	8.666	0.531	52	73	46	43	50	104	89	96	45	48	45	50	67	113	8	70
25225	NM_001004472	chr1	158449667	158450675	+	OR10R2	Unmarked	1.667	0.455	8.333	0.595	87	83	60	45	58	122	87	67	61	53	40	36	68	76	3	53
25176	NM_001005189	chr1	158516917	158517895	-	OR6Y1	Unmarked	2.333	0.467	8.333	0.521	71	72	61	57	53	94	87	73	55	53	45	46	82	89	5	56
21574	NM_001160325	chr1	158532440	158533394	-	OR6P1	Unmarked	0.333	0.083	12.333	0.881	64	61	66	38	60	117	88	73	46	64	43	52	59	96	7	65
24962	NM_001004477	chr1	158548708	158549689	-	OR10X1	Unmarked	1.333	0.666	8.667	0.65	87	88	46	58	64	101	88	77	52	54	33	34	76	87	5	49
23542	NM_001004478	chr1	158576228	158577170	+	OR10Z1	Unmarked	1	0.214	10.333	0.484	49	101	43	43	79	76	111	70	43	65	50	49	65	94	3	58
27010	NM_003126	chr1	158580495	158656506	-	SPTA1	Unmarked	2	0.462	5.333	0.485	109	92	61	47	88	159	59	62	56	51	26	20	57	65	7	40
24909	NM_001005279	chr1	158669467	158670442	-	OR6K2	Unmarked	1	0.176	8.667	0.565	59	79	51	53	60	103	81	87	53	51	31	37	69	99	9	77
25343	NM_001005327	chr1	158686957	158687905	-	OR6K3	Unmarked	0.333	0.071	8.333	0.455	97	98	47	54	83	122	70	70	52	39	26	32	64	85	6	54
22330	NM_001005184	chr1	158724605	158725637	+	OR6K6	Unmarked	1.333	0.333	11.666	0.565	84	79	69	48	51	100	71	74	59	47	47	44	87	70	10	59
21754	NM_001005185	chr1	158735533	158736472	-	OR6N1	Unmarked	1.333	0.666	12.333	0.881	79	83	68	47	66	87	77	64	69	42	67	40	63	81	6	60
23863	NM_001005278	chr1	158746471	158747425	-	OR6N2	Unmarked	1	0.3	10	0.769	76	78	66	44	75	101	84	70	49	59	39	45	63	92	3	55
25755	NM_002432	chr1	158801167	158819270	+	MNDA	Unmarked	1	0.375	7.666	0.697	104	71	82	52	74	112	68	60	72	54	47	28	59	76	5	35
25347	NM_152501	chr1	158901336	158946849	+	PYHIN1	Unmarked	1	0.375	8.333	0.862	113	85	76	48	71	104	59	68	68	41	51	30	70	72	4	39
6906	NM_005531	chr1	158979681	159024945	+	IFI16	Unmarked	1.667	0.715	35.666	2.432	90	80	72	51	60	100	71	71	67	49	45	34	75	73	7	54
20393	NM_004833	chr1	159032274	159046647	-	AIM2	Unmarked	1	0.214	13.333	1	64	50	75	50	48	94	81	72	57	63	53	50	71	88	13	70
6571	NM_021189	chr1	159141376	159172932	+	CADM3	H3K4me3-only	157.667	33.783	38	2.111	28	22	72	33	20	27	77	53	56	55	136	96	50	73	58	143
6531	NM_001127173	chr1	159141413	159172932	+	CADM3	H3K4me3-only	167.667	50.305	38.333	2.212	25	19	70	33	17	28	77	55	55	56	137	97	51	73	61	145
13224	NR_037870	chr1	159165774	159172212	-	LOC100131825	Unmarked	2	0.462	19.333	1.234	61	36	89	67	24	41	75	47	67	40	121	68	101	70	11	81
10056	NM_002036	chr1	159173802	159176290	+	DARC	Unmarked	4.667	0.737	23.666	1.109	75	51	81	73	40	49	72	51	73	37	59	56	91	76	13	102
9041	NM_001122951	chr1	159175048	159176290	+	DARC	Unmarked	4.333	0.619	26	1.182	25	31	52	35	21	72	92	105	39	46	56	71	58	141	13	142
26683	NM_002001	chr1	159259503	159278014	+	FCER1A	Unmarked	4	1.715	6	0.6	76	70	65	54	68	108	73	78	45	57	38	40	76	92	3	56
22347	NM_001004467	chr1	159283459	159284449	-	OR10J3	Unmarked	3.667	1	11.666	0.745	59	78	50	50	53	86	88	86	46	48	56	47	79	101	3	69
22269	NM_012351	chr1	159409511	159410600	+	OR10J1	Unmarked	2	0.5	11.667	0.761	100	96	74	52	71	80	78	57	72	48	40	38	79	62	6	46
26582	NM_001004469	chr1	159504867	159505797	-	OR10J5	Unmarked	1.333	0.333	6.333	0.487	64	80	55	46	48	127	92	77	49	55	39	49	83	82	6	47
24612	NM_001639	chr1	159557615	159558661	+	APCS	Unmarked	2.333	1.167	9.333	0.718	74	62	93	50	58	58	61	74	68	38	53	58	78	93	10	71
24439	NM_000567	chr1	159682078	159684379	-	CRP	Unmarked	0.333	0.1	9.333	0.757	88	67	75	36	52	89	94	67	64	77	61	38	62	69	10	50
10536	NM_017823	chr1	159750758	159752333	+	DUSP23	H3K4me3-only	110	15.001	22.667	1.015	30	25	69	46	16	31	58	55	64	42	124	106	60	63	85	125
11074	NM_001004310	chr1	159772172	159786047	+	FCRL6	Unmarked	2.667	0.8	22	1.467	61	51	78	46	39	71	75	74	58	53	83	57	78	84	15	76
6953	NM_020125	chr1	159796478	159807282	+	SLAMF8	Unmarked	2.333	0.538	35.333	1.738	47	38	115	38	24	46	89	52	95	55	113	68	72	73	14	60
2643	NM_001134233	chr1	159804263	159825137	-	C1orf204	Bivalent	41.333	4.96	142.333	7.907	55	28	84	46	30	31	63	43	72	35	96	101	56	73	62	124
6983	NM_001013661	chr1	159824105	159832447	-	VSIG8	Unmarked	2.667	0.571	35	1.667	32	25	84	49	27	40	87	56	62	52	116	69	69	94	11	126
5262	NM_012337	chr1	159842153	159869906	-	CCDC19	Unmarked	10.333	1.632	52.667	2.678	67	29	88	37	27	34	76	44	72	57	156	81	54	61	46	70
4228	NM_001277223	chr1	159887896	159894341	-	TAGLN2	Bivalent	61.333	14.155	73	3.369	26	22	56	46	19	44	86	66	51	57	130	78	54	93	43	128
4322	NM_001277224	chr1	159887896	159893507	-	TAGLN2	H3K27me3-only	11	3	71	3.55	28	24	46	49	20	75	83	95	30	59	68	61	69	115	21	156
4397	NM_003564	chr1	159887896	159895332	-	TAGLN2	Bivalent	107	15.286	69.333	3.41	39	11	71	51	27	45	70	64	49	59	106	87	56	92	54	118
16215	NM_020789	chr1	159896828	159915386	-	IGSF9	H3K4me3-only	158.667	23.799	16.666	0.633	35	27	101	22	23	37	73	44	93	60	175	82	34	53	61	79
10251	NM_001146172	chr1	159921281	159924044	-	SLAMF9	Unmarked	1.333	0.235	23.333	1.522	75	59	104	43	48	49	78	57	90	53	108	48	69	70	9	39
15707	NR_038849	chr1	159931013	159948876	+	LOC100505633	Unmarked	1.333	0.308	17	1.041	77	57	79	37	40	96	82	66	67	57	71	46	67	74	8	75
9675	NM_145167	chr1	159997461	160001783	-	PIGM	H3K4me3-only	251.666	32.825	24.333	1.217	57	39	67	51	35	52	55	69	61	44	103	82	61	76	66	81
4027	NM_002241	chr1	160007256	160040051	-	KCNJ10	Bivalent	108.667	19.175	78.333	3.917	27	25	44	34	16	41	48	102	30	37	82	89	57	104	64	199
3778	NM_004983	chr1	160051359	160059212	+	KCNJ9	H3K27me3-only	2.333	0.778	86.667	3.768	59	36	95	39	30	75	72	57	78	47	121	57	61	76	16	80
8225	NM_001206665	chr1	160061128	160068618	-	IGSF8	H3K4me3-only	92.667	25.271	28.667	1.284	28	20	70	24	11	24	60	41	54	33	218	125	49	60	81	101
8319	NM_052868	chr1	160061128	160068439	-	IGSF8	H3K4me3-only	113.333	42.495	28.333	1.25	19	13	72	23	11	21	54	47	50	32	218	126	47	66	82	118
7616	NM_000702	chr1	160085519	160113374	+	ATP1A2	H3K4me3-only	34.333	3.961	31.333	1.068	46	35	82	42	28	49	69	85	66	52	111	51	65	96	18	104
13078	NM_144699	chr1	160121351	160156767	+	ATP1A4	Unmarked	1.666	0.357	19.333	1.094	33	33	49	59	23	89	58	112	42	25	61	63	77	135	22	118
9982	NM_001001734	chr1	160147200	160156767	+	ATP1A4	Unmarked	2.333	0.412	23.667	1.029	74	46	109	44	43	76	79	58	85	60	73	46	70	74	3	59
7595	NM_001231	chr1	160160284	160171676	+	CASQ1	Unmarked	3.333	0.526	31.666	1.25	34	45	72	53	42	56	66	70	60	39	91	55	69	94	16	137
8332	NM_003768	chr1	160175124	160185162	+	PEA15	H3K4me3-only	176	29.333	28.333	1.288	45	26	83	31	17	31	45	68	64	44	125	91	58	60	71	140
18862	NM_015726	chr1	160185504	160232350	-	DCAF8	H3K4me3-only	276.667	55.333	14.666	0.88	71	28	68	46	30	58	56	66	51	47	81	89	61	77	63	107
18992	NR_028105	chr1	160209011	160232318	-	DCAF8	H3K4me3-only	293.667	55.066	14.666	0.863	70	29	68	43	30	58	60	66	51	51	80	90	58	77	64	104
19048	NR_028106	chr1	160209011	160232277	-	DCAF8	H3K4me3-only	316.333	55.82	14.666	0.846	66	29	66	41	30	59	61	67	51	52	82	91	55	76	67	106
17848	NM_002857	chr1	160246598	160254941	-	PEX19	H3K4me3-only	222.333	31.762	15.333	0.697	103	46	90	40	44	54	57	55	72	51	97	64	60	59	40	67
19940	NM_004371	chr1	160258376	160313354	-	COPA	H3K4me3-only	330.333	55.056	13.667	0.707	97	23	102	55	29	44	47	52	96	50	119	58	55	55	55	62
25031	NR_002190	chr1	160287054	160288260	+	SUMO1P3	Unmarked	1.333	0.8	8.666	0.684	148	67	95	54	49	81	53	56	84	45	58	29	82	46	10	42
20948	NM_015331	chr1	160313062	160328742	+	NCSTN	H3K4me3-only	404.333	63.845	13	0.619	48	22	63	59	23	57	41	99	58	44	78	58	63	97	56	133
13436	NM_005598	chr1	160336860	160342638	+	NHLH1	Unmarked	4.667	1	19	1.326	30	34	60	35	31	44	99	74	45	60	97	71	53	110	18	138
11241	NM_020335	chr1	160370363	160398468	+	VANGL2	H3K4me3-only	171.333	32.127	21.666	1.066	63	32	73	31	10	26	43	55	75	25	144	91	51	51	76	153
22125	NM_001184714	chr1	160454819	160493052	-	SLAMF6	Unmarked	2.667	0.421	12	0.75	107	74	64	51	74	126	77	51	50	62	49	40	65	66	11	32
22323	NM_001184881	chr1	160510883	160549306	-	CD84	Unmarked	2	1	11.666	0.897	111	70	68	47	69	114	72	61	52	50	35	43	63	83	5	56
9385	NM_003037	chr1	160579890	160617081	-	SLAMF1	Unmarked	2	0.545	25	1.923	76	58	78	66	35	56	81	63	74	40	63	59	92	81	15	62
21237	NM_001778	chr1	160648535	160681641	-	CD48	Unmarked	0.667	0.182	12.667	1.056	77	52	73	37	40	96	88	71	63	64	80	45	60	82	11	60
24112	NM_021181	chr1	160709076	160724601	+	SLAMF7	Unmarked	1.333	0.444	9.667	0.763	110	90	69	46	72	72	66	72	68	35	63	38	66	85	5	42
19195	NM_002348	chr1	160765863	160798045	+	LY9	Unmarked	2.333	0.7	14.333	0.935	59	49	83	70	41	73	70	74	62	49	55	52	100	87	9	66
14206	NM_001166664	chr1	160799949	160832692	-	CD244	Unmarked	2.333	0.778	18.333	1.122	46	34	74	49	27	57	92	78	56	56	89	68	74	106	14	79
21641	NM_017625	chr1	160846329	160854960	-	ITLN1	Unmarked	1.666	0.294	12.333	0.804	71	44	86	50	36	92	81	58	72	51	75	55	71	81	11	65
19057	NM_080878	chr1	160914815	160924589	-	ITLN2	Unmarked	3.667	0.314	14.666	0.564	39	52	96	32	35	70	83	66	69	55	105	66	76	78	11	66
17791	NM_016946	chr1	160965000	160991133	-	F11R	H3K4me3-only	201	30.148	15.333	0.575	52	26	72	46	26	67	56	83	51	58	102	68	67	81	49	95
13488	NM_001113207	chr1	161007421	161008774	-	TSTD1	H3K4me3-only	222	55.5	19	0.983	28	22	76	32	19	91	73	54	62	55	149	89	48	69	58	74
7774	NM_207005	chr1	161009040	161015769	-	USF1	H3K4me3-only	313.333	34.815	30.667	1.373	58	35	77	39	28	65	68	64	66	43	96	89	56	82	54	79
15794	NM_001276373	chr1	161009040	161014727	-	USF1	H3K4me3-only	168.333	42.083	17	0.879	52	48	65	32	43	128	81	76	50	63	69	52	52	89	20	79
11986	NM_001025598	chr1	161016731	161039760	-	ARHGAP30	Unmarked	3.333	0.769	20.666	1.148	54	27	93	48	27	50	78	49	61	47	110	79	80	79	17	100
13316	NM_030916	chr1	161040780	161059385	-	PVRL4	Unmarked	4.333	0.565	19	0.864	30	23	67	54	23	51	82	72	51	44	95	81	70	110	26	120
11514	NR_033385	chr1	161068150	161070138	+	KLHDC9	H3K4me3-only	214.333	24.73	21.333	0.853	37	27	69	50	26	54	65	57	60	52	114	87	60	68	66	107
11441	NM_152366	chr1	161068180	161070138	+	KLHDC9	H3K4me3-only	216.333	28.216	21.333	0.853	33	24	71	51	24	50	66	57	59	55	117	89	62	68	67	106
10194	NM_012394	chr1	161070345	161087866	-	PFDN2	H3K4me3-only	373	44.762	23.333	0.864	58	26	88	46	29	36	51	63	66	47	111	87	64	70	61	96
10214	NM_001185092	chr1	161087861	161095235	+	NIT1	H3K4me3-only	374	44.882	23.333	0.864	35	25	71	48	28	58	64	66	63	46	96	87	53	87	61	111
10149	NM_001185093	chr1	161087906	161090984	+	NIT1	H3K4me3-only	361.667	45.208	23.333	0.854	34	26	70	47	25	57	64	68	64	43	96	88	54	88	61	114
10278	NM_001185094	chr1	161087907	161090984	+	NIT1	H3K4me3-only	361.333	45.167	23.333	0.854	34	26	70	47	25	57	64	68	64	43	96	88	54	88	61	114
18752	NM_001039712	chr1	161090768	161102256	-	DEDD	H3K4me3-only	219.667	36.611	14.666	0.667	46	31	97	27	21	27	67	36	97	43	188	91	37	50	68	73
19290	NM_032998	chr1	161090768	161102478	-	DEDD	H3K4me3-only	228.667	36.107	14.333	0.632	41	36	85	33	21	28	54	52	82	38	153	97	51	53	78	97
19441	NM_016406	chr1	161123533	161128646	+	UFC1	H3K4me3-only	236.333	88.614	14.333	0.843	103	61	77	48	65	73	65	60	65	65	70	50	56	64	38	39
11839	NM_012475	chr1	161129253	161135516	+	USP21	H3K4me3-only	219.333	24.37	20.667	0.738	34	29	62	41	25	38	85	47	62	49	151	99	46	78	63	90
12356	NM_000309	chr1	161136180	161141010	+	PPOX	H3K4me3-only	253	25.3	20	0.845	35	26	72	44	39	45	69	60	55	63	108	89	48	80	65	101
13523	NM_001199873	chr1	161141099	161147758	-	B4GALT3	H3K4me3-only	57.667	9.611	19	1.076	67	61	72	55	56	68	57	58	55	42	70	73	77	68	41	79
8494	NM_005099	chr1	161159537	161168845	-	ADAMTS4	H3K4me3-only	29	4.833	27.667	0.892	52	30	124	45	24	47	53	59	90	28	92	75	85	77	16	102
8730	NM_004550	chr1	161169104	161184184	+	NDUFS2	Unmarked	17.333	2.889	27	0.853	52	39	81	29	27	57	80	92	67	43	97	66	54	117	15	83
9150	NM_001166159	chr1	161171936	161184184	+	NDUFS2	H3K4me3-only	158.667	18.307	25.667	0.846	50	36	80	42	28	59	58	63	67	41	106	86	63	72	56	92
20734	NM_004106	chr1	161185086	161189038	+	FCER1G	Unmarked	1	0.273	13.333	0.851	74	35	91	38	31	55	74	65	68	58	98	69	65	78	29	71
15777	NM_001643	chr1	161192082	161193418	-	APOA2	Unmarked	1.333	0.222	17	0.823	62	58	85	40	42	45	76	69	63	46	84	54	77	83	3	112
14094	NM_032174	chr1	161195832	161200407	+	TOMM40L	H3K4me3-only	117.667	23.533	18.333	0.753	56	43	78	34	31	81	77	64	64	52	125	63	60	76	24	71
15599	NR_049819	chr1	161196975	161197051	+	MIR5187	H3K4me3-only	32.667	3.769	17	0.718	42	55	73	38	37	77	92	71	70	60	103	46	58	85	11	81
11933	NM_001077469	chr1	161199455	161208000	-	NR1I3	Unmarked	3	0.529	20.666	1.069	77	40	77	56	34	83	77	68	57	56	73	51	81	83	11	75
2300	NM_001102566	chr1	161228516	161255240	+	PCP4L1	Bivalent	89.334	17.867	167	12.525	28	27	61	40	25	59	61	85	55	40	97	92	48	103	66	112
12358	NM_000530	chr1	161274524	161279762	-	MPZ	Unmarked	1	0.375	20	1.622	81	55	74	41	45	55	68	68	49	41	83	55	76	85	3	120
14695	NM_001035513	chr1	161284165	161334535	+	SDHC	H3K4me3-only	278	37.911	17.667	1.019	61	30	74	53	34	65	55	67	69	46	82	72	54	80	58	99
21631	NM_001013625	chr1	161334520	161337673	-	C1orf192	Unmarked	2.333	0.437	12.333	0.698	120	72	80	43	71	109	62	57	50	63	53	36	74	55	7	47
10999	NM_001136219	chr1	161475204	161489360	+	FCGR2A	Unmarked	0.667	0.2	22	1.5	74	49	83	56	44	61	73	61	79	51	74	51	66	78	24	75
2943	NM_002155	chr1	161494035	161496687	+	HSPA6	Bivalent	142.667	25.175	123	10.543	68	42	77	33	32	43	57	61	61	39	91	105	59	69	72	90
22113	NM_000569	chr1	161511550	161519818	-	FCGR3A	Unmarked	0.667	0.111	12	1	53	49	83	39	28	70	88	77	80	52	92	46	62	92	8	80
22905	NM_001127596	chr1	161511550	161520413	-	FCGR3A	Unmarked	0.333	0.143	11	1.32	71	46	83	49	34	58	77	60	77	49	93	50	67	77	16	92
27959	NM_201563	chr1	161551128	161570032	+	FCGR2C	Unmarked	0	10	0.667	1	62	47	92	41	27	72	89	67	90	53	89	45	63	83	7	72
3351	NR_024151	chr1	161575848	161578341	+	HSPA7	Bivalent	13.667	6.833	104	6.783	46	37	71	42	25	36	54	61	58	36	101	116	67	67	85	97
22466	NM_001244753	chr1	161592987	161601252	-	FCGR3B	Unmarked	2.667	0.889	11.666	2.188	57	49	81	43	28	69	83	76	80	48	90	48	66	90	11	80
22553	NM_001271036	chr1	161592987	161600837	-	FCGR3B	Unmarked	2.333	0.7	11.333	2	52	49	83	40	29	71	89	75	76	59	101	45	68	85	7	70
23160	NM_000570	chr1	161592987	161601753	-	FCGR3B	Unmarked	1.333	1	11	2.2	70	47	82	51	33	59	78	62	77	48	90	48	70	78	12	94
27857	NM_004001	chr1	161632904	161648444	+	FCGR2B	Unmarked	0	10	2	6.006	62	50	92	40	24	72	91	65	93	51	95	45	64	79	6	70
22853	NR_002595	chr1	161653494	161655042	-	RPL31P11	Unmarked	2	0.5	11.333	0.791	120	66	59	54	51	65	72	66	59	46	55	50	70	77	24	65
15462	NM_001184873	chr1	161676761	161684142	+	FCRLA	Unmarked	1	0.188	17.333	1.209	76	67	77	44	47	78	96	64	80	48	55	49	60	92	5	61
6390	NM_001002901	chr1	161692456	161697933	+	FCRLB	Unmarked	3.667	0.458	39.333	1.903	45	44	84	29	24	68	87	96	60	61	101	57	72	103	7	61
8964	NM_007240	chr1	161719580	161726952	+	DUSP12	H3K4me3-only	279.667	76.266	26.333	1.756	66	51	77	32	29	43	67	60	68	49	101	91	62	57	64	82
12269	NM_007348	chr1	161736033	161933860	+	ATF6	H3K4me3-only	211.667	57.722	20.333	1.419	76	56	63	43	68	119	66	66	54	79	72	35	41	65	38	58
2547	NM_015441	chr1	161952981	161993644	-	OLFML2B	Bivalent	177.667	24.228	149	7.21	40	15	68	37	17	29	43	93	46	40	64	115	57	98	90	147
7853	NM_001164757	chr1	162039580	162339813	+	NOS1AP	H3K4me3-only	214.333	107.166	30.333	1.569	49	17	51	43	12	24	36	63	36	23	111	137	63	71	110	153
23289	NR_039798	chr1	162126896	162126972	+	MIR4654	Unmarked	2.333	0.778	10.666	0.762	63	74	73	39	74	109	88	48	56	57	76	52	56	78	5	51
20810	NR_030283	chr1	162312335	162312430	+	MIR556	Unmarked	1.333	0.286	13	0.736	86	83	93	49	69	64	79	52	85	51	59	39	70	67	3	50
20654	NM_001126060	chr1	162332772	162339813	+	NOS1AP	Unmarked	1	0.375	13.333	1.026	78	63	74	63	56	96	67	64	60	46	50	39	83	79	4	77
23232	NM_182581	chr1	162343514	162346644	-	C1orf111	Unmarked	2	0.429	10.667	0.571	99	63	70	54	48	91	75	67	60	49	59	45	80	78	8	53
[truncated: 26,138 more rows]
