# Supplementary material for: Decoding the function of bivalent chromatin in development and cancer
Source: HighWire-hosted journal article supplement (doi:10.1101/gr.275736.121), 2021-10-19
Supplement: Supplemental_Table_S2.xlsx [file Supplemental_Table_S2.xlsx]

## Sheet: Mouse_ESC_2i
Supplemental Table 2. Chromatin states and dinucleotide frequencies of mouse gene promoters.
No	RefSeq Accession	Gene Coordinates (mm9)				Gene Symbol	Chromatin State	H3K4me3 signal (RPM)	H3K4me3 Fold over Input	H3K27me3 signal (RPM)	H3K27me3 Fold over Input	Dinucleotide Frequency at the promoter (+/-500 bp of TSS)
		Chr	Start	End	Strand							AA	AT	AG	AC	TA	TT	TG	TC	GA	GT	GG	GC	CA	CT	CG	CC
5549	NM_001011874	chr1	3204562	3661579	-	Xkr4	H3K4me3-only	88.897	25.348	48.445	2.607	18	13	79	20	6	8	60	52	63	29	165	164	42	77	117	86
12590	NM_001195662	chr1	4280926	4399322	-	Rp1	Unmarked	0	0	19.271	1.122	87	79	66	52	68	109	88	50	64	47	57	46	64	81	3	38
15788	NM_011283	chr1	4333587	4350395	-	Rp1	Unmarked	0.354	0.084	12.58	0.69	111	84	77	56	98	95	67	39	62	53	61	36	57	68	6	29
400	NM_011441	chr1	4481008	4486494	-	Sox17	H3K27me3-only	19.834	2.175	106.793	3.76	71	40	78	57	51	82	69	60	60	55	69	57	65	84	25	76
24449	NM_001177658	chr1	4763278	4775807	-	Mrpl15	H3K4me3-only	463.257	42.614	4.55	0.16	74	37	70	60	49	69	60	44	47	53	85	92	70	63	62	64
24477	NR_033530	chr1	4763278	4775807	-	Mrpl15	H3K4me3-only	463.257	42.614	4.55	0.16	74	37	70	60	49	69	60	44	47	53	85	92	70	63	62	64
24858	NM_025300	chr1	4763278	4775807	-	Mrpl15	H3K4me3-only	463.257	42.614	4.55	0.16	74	37	70	60	49	69	60	44	47	53	85	92	70	63	62	64
25182	NM_008866	chr1	4797973	4836816	+	Lypla1	H3K4me3-only	319.109	43.334	4.282	0.172	51	34	59	43	30	51	68	44	58	52	95	117	47	57	100	93
26612	NM_001159750	chr1	4847774	4887990	+	Tcea1	H3K4me3-only	243.316	27.754	3.479	0.1	54	35	68	40	31	68	60	60	59	52	89	101	53	63	85	81
26627	NM_011541	chr1	4847774	4887990	+	Tcea1	H3K4me3-only	243.316	27.754	3.479	0.1	54	35	68	40	31	68	60	60	59	52	89	101	53	63	85	81
25690	NM_001159751	chr1	4848408	4887990	+	Tcea1	H3K4me3-only	335.755	30.885	4.015	0.124	50	32	67	41	30	71	78	55	53	63	73	103	56	68	74	85
1371	NM_021374	chr1	4899656	5009507	-	Rgs20	H3K4me3-only	105.543	10.033	86.986	2.953	53	26	103	43	26	34	44	62	81	41	98	84	65	65	59	115
20520	NM_001177795	chr1	4899656	5060366	-	Rgs20	Unmarked	1.771	0.281	7.227	0.308	82	58	98	57	49	86	63	58	70	44	61	52	94	68	5	54
24669	NM_133826	chr1	5073253	5152630	+	Atp6v1h	H3K4me3-only	264.212	27.906	4.55	0.194	55	36	63	38	37	71	67	67	51	52	91	89	50	83	62	87
11598	NM_011011	chr1	5578573	5596214	+	Oprk1	H3K4me3-only	26.209	3.397	22.215	1.195	61	40	93	45	32	62	78	54	68	43	112	80	78	81	20	52
11608	NM_001204371	chr1	5578573	5596214	+	Oprk1	H3K4me3-only	26.209	3.397	22.215	1.195	61	40	93	45	32	62	78	54	68	43	112	80	78	81	20	52
3233	NM_010342	chr1	5903787	5907479	-	Npbwr1	H3K4me3-only	76.501	9.916	65.842	2.29	45	38	62	48	35	52	84	80	48	60	72	89	65	102	51	68
27001	NM_009826	chr1	6204742	6266185	+	Rb1cc1	H3K4me3-only	359.13	64.005	3.479	0.132	19	15	61	41	14	33	59	60	51	50	122	127	52	68	108	119
5501	NM_001195732	chr1	6349411	6384812	+	Fam150a	H3K4me3-only	81.46	19.358	48.712	2.277	48	34	70	51	27	43	75	69	65	42	75	80	63	95	42	120
14323	NM_001244692	chr1	6477311	6851021	+	St18	Unmarked	2.833	0.449	15.256	0.75	105	57	93	59	57	90	69	45	78	46	75	44	74	69	6	32
14402	NM_001244693	chr1	6477311	6851021	+	St18	Unmarked	2.833	0.449	15.256	0.75	105	57	93	59	57	90	69	45	78	46	75	44	74	69	6	32
13781	NR_045188	chr1	6720131	6851021	+	St18	Unmarked	3.188	0.455	16.327	0.776	81	67	76	47	49	91	87	60	65	65	64	48	77	63	15	44
13789	NM_173868	chr1	6720131	6851021	+	St18	Unmarked	3.188	0.455	16.327	0.776	81	67	76	47	49	91	87	60	65	65	64	48	77	63	15	44
13883	NR_045189	chr1	6720131	6851021	+	St18	Unmarked	3.188	0.455	16.327	0.776	81	67	76	47	49	91	87	60	65	65	64	48	77	63	15	44
26280	NM_183028	chr1	7079000	7163709	+	Pcmtd1	H3K4me3-only	353.818	59.355	3.747	0.135	31	21	77	46	17	48	62	52	65	46	113	119	62	64	91	85
2625	NM_027671	chr1	8352741	9289811	-	Sntg1	Bivalent	76.147	13.571	71.463	3.287	40	18	68	52	25	45	62	64	44	48	94	103	69	85	66	116
10517	NM_021511	chr1	9535488	9537536	+	Rrs1	H3K4me3-only	291.129	37.735	25.694	1.221	50	28	74	56	27	26	64	51	59	46	80	111	71	68	79	109
23020	NR_027664	chr1	9538126	9568049	+	Adhfe1	H3K4me3-only	134.94	15.392	5.353	0.209	74	40	88	61	49	94	75	52	64	60	74	57	75	77	18	41
23314	NM_175236	chr1	9538126	9568049	+	Adhfe1	H3K4me3-only	134.94	15.392	5.353	0.209	74	40	88	61	49	94	75	52	64	60	74	57	75	77	18	41
18744	NR_015470	chr1	9550913	9621173	-	2610203C22Rik	Unmarked	5.667	0.735	8.832	0.355	57	48	107	48	50	68	82	67	86	59	53	51	68	92	6	57
4240	NM_178399	chr1	9591347	9617223	+	3110035E14Rik	H3K27me3-only	18.771	2.677	57.277	3.025	114	69	78	57	64	55	74	46	81	50	65	44	59	65	23	55
25849	NM_008651	chr1	9658915	9690290	-	Mybl1	H3K4me3-only	255.004	60.6	4.015	0.149	18	21	51	31	14	28	58	70	47	40	123	125	42	81	104	146
23114	NM_173443	chr1	9713277	9738463	-	Vcpip1	H3K4me3-only	309.546	30.437	5.353	0.18	44	19	84	47	22	56	58	70	82	53	93	82	46	78	76	89
22507	NR_040462	chr1	9737728	9761337	+	1700034P13Rik	H3K4me3-only	303.171	43.23	5.621	0.176	46	51	78	42	32	52	63	69	65	52	83	86	74	61	62	83
3515	NM_133220	chr1	9788210	9892649	+	Sgk3	H3K4me3-only	172.482	20.495	63.166	1.958	57	25	53	31	16	26	43	69	50	46	106	129	42	58	129	119
3521	NM_177547	chr1	9788210	9892649	+	Sgk3	H3K4me3-only	172.482	20.495	63.166	1.958	57	25	53	31	16	26	43	69	50	46	106	129	42	58	129	119
7420	NM_001037759	chr1	9838361	9892649	+	Sgk3	H3K4me3-only	137.065	16.995	38.274	1.226	41	30	68	41	33	69	84	51	63	61	120	83	43	77	54	81
14683	NM_177722	chr1	9898718	9931035	+	Mcmdc2	H3K4me3-only	66.939	6.817	14.453	0.438	52	56	70	44	41	91	83	69	56	58	58	71	72	80	32	66
23124	NR_024067	chr1	9932105	9934199	-	Snhg6	H3K4me3-only	346.734	28.249	5.353	0.151	71	41	75	49	49	63	52	53	52	48	95	85	64	66	58	78
19080	NR_004410	chr1	9932550	9932624	-	Snord87	H3K4me3-only	329.734	37.611	8.297	0.221	98	72	73	50	64	119	92	29	64	60	60	48	67	53	7	43
9417	NM_145692	chr1	9958706	9999201	-	Ppp1r42	H3K4me3-only	77.918	8.546	29.709	0.941	103	36	95	60	42	44	64	46	84	42	80	61	65	74	28	75
9386	NM_027033	chr1	9985143	9999211	-	Ppp1r42	H3K4me3-only	77.918	8.546	29.709	0.941	104	36	95	62	43	43	63	45	83	42	80	61	67	72	28	75
27868	NR_102282	chr1	10014680	10028240	-	Cops5	H3K4me3-only	500.445	54.885	2.677	0.086	103	46	67	67	45	60	52	56	57	45	49	72	77	63	55	85
27993	NM_001277101	chr1	10014680	10028240	-	Cops5	H3K4me3-only	500.445	54.885	2.677	0.086	103	46	67	67	45	60	52	56	57	45	49	72	77	63	55	85
28002	NM_013715	chr1	10014680	10028240	-	Cops5	H3K4me3-only	500.445	54.885	2.677	0.086	103	46	67	67	45	60	52	56	57	45	49	72	77	63	55	85
27931	NM_026493	chr1	10028298	10126849	+	Cspp1	H3K4me3-only	484.153	60.031	2.677	0.086	62	49	62	46	48	100	75	58	56	64	83	71	54	67	54	50
5384	NM_001102430	chr1	10127587	10222751	-	Arfgef1	H3K4me3-only	234.108	51.351	49.515	1.765	18	12	56	29	9	17	48	57	58	38	121	148	30	64	140	154
13604	NM_177834	chr1	10314807	10710024	-	Cpa6	Unmarked	7.792	1.307	16.862	0.874	68	47	78	47	43	75	82	67	45	57	54	67	84	88	9	88
10135	NM_029525	chr1	10983545	11293763	+	Prex2	H3K4me3-only	159.023	18.895	27.033	0.857	45	28	69	41	26	70	91	55	47	82	78	98	66	61	67	75
20857	NM_001033636	chr1	11254043	11293763	+	Prex2	Unmarked	1.417	1.01	6.959	0.567	86	81	76	54	81	76	85	46	76	59	54	41	54	71	16	43
17573	NM_001160369	chr1	11404185	11965983	+	A830018L16Rik	H3K4me3-only	213.212	27.636	9.903	0.34	38	25	86	29	24	72	75	67	54	47	76	117	61	94	57	77
17648	NM_001160370	chr1	11404185	11591902	+	A830018L16Rik	H3K4me3-only	213.212	27.636	9.903	0.34	38	25	86	29	24	72	75	67	54	47	76	117	61	94	57	77
17718	NM_001160371	chr1	11404185	11591902	+	A830018L16Rik	H3K4me3-only	213.212	27.636	9.903	0.34	38	25	86	29	24	72	75	67	54	47	76	117	61	94	57	77
17742	NM_177173	chr1	11404185	11965983	+	A830018L16Rik	H3K4me3-only	213.212	27.636	9.903	0.34	38	25	86	29	24	72	75	67	54	47	76	117	61	94	57	77
16676	NR_045297	chr1	12657643	12663171	+	Gm17644	Unmarked	0.354	0	11.241	1.457	27	73	45	17	64	190	101	102	44	89	48	21	26	106	8	38
10768	NM_001198566	chr1	12682510	12850453	+	Sulf1	H3K4me3-only	54.542	8.641	24.624	1.018	66	37	72	40	25	66	56	124	54	45	52	50	70	123	21	98
10834	NM_001198565	chr1	12682510	12850453	+	Sulf1	H3K4me3-only	54.542	8.641	24.624	1.018	66	37	72	40	25	66	56	124	54	45	52	50	70	123	21	98
20596	NM_172294	chr1	12708625	12850453	+	Sulf1	H3K4me3-only	103.418	17.349	6.959	0.336	66	46	76	43	38	80	73	75	66	47	62	58	61	93	22	93
9780	NM_172841	chr1	12856630	12981216	-	Slco5a1	H3K4me3-only	70.126	6.895	28.371	0.87	58	36	69	58	42	71	71	59	56	60	76	75	66	76	50	76
21821	NM_001081209	chr1	13103508	13117244	-	Prdm14	H3K4me3-only	109.793	14.909	6.156	0.247	43	30	60	58	37	103	91	58	55	73	94	56	56	82	34	69
16592	NM_001077695	chr1	13129239	13364164	-	Ncoa2	H3K4me3-only	368.693	52.573	11.241	0.327	15	13	76	33	9	33	44	54	64	38	148	129	49	56	111	127
16671	NM_008678	chr1	13129239	13364164	-	Ncoa2	H3K4me3-only	368.693	52.573	11.241	0.327	15	13	76	33	9	33	44	54	64	38	148	129	49	56	111	127
10194	NM_028173	chr1	13554782	13579945	-	Tram1	H3K4me3-only	167.523	14.05	26.765	0.839	40	17	63	44	13	68	55	40	47	34	108	139	64	57	101	109
27562	NM_145381	chr1	13615979	13650590	-	Lactb2	H3K4me3-only	245.441	26.918	2.944	0.082	47	30	84	58	38	40	66	53	54	64	74	90	80	63	58	100
20227	NM_001011873	chr1	13658851	13691804	+	Xkr9	Unmarked	3.188	0.827	7.227	0.343	77	82	71	44	91	137	86	53	57	82	42	27	49	66	9	26
14762	NR_004447	chr1	13775765	13777010	-	Gm5523	Unmarked	3.896	0.741	14.453	0.425	70	66	62	64	33	63	87	75	60	59	59	42	98	70	12	79
22686	NM_001252192	chr1	14159038	14300280	-	Eya1	H3K4me3-only	178.503	33.936	5.621	0.189	97	41	73	35	44	79	63	61	44	55	65	86	61	72	49	74
22716	NM_010164	chr1	14159038	14300280	-	Eya1	H3K4me3-only	178.503	33.936	5.621	0.189	97	41	73	35	44	79	63	61	44	55	65	86	61	72	49	74
10115	NM_010827	chr1	14743428	14746047	-	Msc	H3K4me3-only	183.815	19.414	27.033	0.787	52	24	89	41	23	47	53	64	70	39	105	93	61	77	59	102
7904	NM_177781	chr1	14862728	14908943	-	Trpa1	H3K4me3-only	68.001	8.814	36.133	1.662	62	46	74	31	40	122	77	64	61	54	81	63	51	81	27	65
8714	NM_001098528	chr1	15302532	15704295	+	Kcnb2	Unmarked	3.188	0.568	32.386	1.811	69	58	80	63	43	71	75	63	86	41	69	52	72	82	24	51
24741	NM_009352	chr1	15795738	15833510	+	Terf1	H3K4me3-only	393.485	59.055	4.55	0.206	51	38	73	46	31	60	69	56	69	45	78	98	57	73	71	84
3103	NM_001033288	chr1	15843942	15882803	-	Sbspon	H3K4me3-only	133.169	14.605	66.913	2.03	37	25	76	37	21	46	72	58	57	51	131	97	59	75	58	99
4103	NM_001243238	chr1	16056059	16083122	-	4930444P10Rik	H3K4me3-only	81.46	11.062	58.348	2.773	39	31	71	44	24	52	69	65	54	39	88	104	68	89	56	106
17429	NM_011291	chr1	16091375	16094514	-	Rpl7	H3K4me3-only	342.13	39.025	10.171	0.337	72	44	76	43	39	74	72	62	65	57	67	74	60	72	47	75
9497	NM_133832	chr1	16095962	16122631	+	Rdh10	H3K4me3-only	242.254	36.358	29.174	0.867	23	15	67	44	8	20	67	51	56	48	124	146	62	63	115	90
6745	NM_025303	chr1	16218890	16509383	-	Stau2	H3K4me3-only	116.523	47.464	41.753	1.701	23	11	181	37	9	5	27	20	173	24	165	111	47	21	99	46
6751	NM_001111272	chr1	16218890	16509383	-	Stau2	H3K4me3-only	116.523	47.464	41.753	1.701	23	11	181	37	9	5	27	20	173	24	165	111	47	21	99	46
8020	NM_001271016	chr1	16530868	16609419	-	Ube2w	H3K4me3-only	247.212	37.102	35.33	1.399	49	32	54	34	23	36	60	63	52	46	120	110	45	68	94	113
8003	NR_073122	chr1	16558754	16609419	-	Ube2w	H3K4me3-only	247.212	37.102	35.33	1.399	49	32	54	34	23	36	60	63	52	46	120	110	45	68	94	113
8008	NM_001271017	chr1	16558754	16609419	-	Ube2w	H3K4me3-only	247.212	37.102	35.33	1.399	49	32	54	34	23	36	60	63	52	46	120	110	45	68	94	113
8030	NM_025773	chr1	16558754	16609419	-	Ube2w	H3K4me3-only	247.212	37.102	35.33	1.399	49	32	54	34	23	36	60	63	52	46	120	110	45	68	94	113
28304	NM_026456	chr1	16632845	16646946	-	Tceb1	H3K4me3-only	369.756	36.358	2.409	0.088	58	35	73	45	42	68	72	54	65	52	114	79	45	81	51	65
27864	NR_037998	chr1	16647632	16652359	+	D030040B21Rik	H3K4me3-only	95.626	13.636	2.944	0.109	76	63	61	40	57	122	80	69	41	66	42	52	65	77	19	69
14086	NM_026392	chr1	16655271	16668356	+	Tmem70	H3K4me3-only	138.127	17.904	15.791	0.6	49	43	56	46	38	71	70	65	45	53	106	92	62	76	64	63
14135	NM_027415	chr1	16655271	16668356	+	Tmem70	H3K4me3-only	138.127	17.904	15.791	0.6	49	43	56	46	38	71	70	65	45	53	106	92	62	76	64	63
18776	NM_001159711	chr1	16678536	16699686	+	Ly96	H3K4me3-only	71.543	12.75	8.565	0.317	66	44	75	49	51	86	79	69	62	64	61	54	54	92	26	67
18964	NM_016923	chr1	16678536	16699686	+	Ly96	H3K4me3-only	71.543	12.75	8.565	0.317	66	44	75	49	51	86	79	69	62	64	61	54	54	92	26	67
1484	NM_020604	chr1	16985020	17087970	-	Jph1	Bivalent	111.918	17.731	85.381	3.478	37	13	71	79	16	14	49	40	56	34	143	116	91	58	86	96
12841	NM_010267	chr1	17135453	17154351	+	Gdap1	H3K4me3-only	51.001	7.654	18.736	1.048	86	58	74	53	52	84	59	62	56	43	65	62	76	73	28	68
19508	NM_053191	chr1	17591981	17621020	+	Pi15	Unmarked	1.771	0.459	8.03	0.458	76	64	65	45	60	131	84	63	48	59	43	48	67	84	6	56
15539	NM_031402	chr1	17717497	17756288	+	Crispld1	H3K4me3-only	51.355	6.657	12.847	0.601	66	26	96	42	27	61	67	72	63	51	92	70	74	89	21	82
18079	NM_030033	chr1	18105271	18127132	-	Crisp4	Unmarked	0.354	0.056	9.368	0.557	103	108	58	54	106	131	64	61	50	51	25	23	64	72	1	28
27507	NR_002879	chr1	18200133	18213645	-	Defb44-ps	Unmarked	1.417	0.192	2.944	0.168	128	89	77	51	75	112	73	47	74	52	31	31	68	54	6	31
15872	NM_001039123	chr1	18226553	18227524	-	Defb18	Unmarked	1.417	0.449	12.312	0.605	120	112	56	34	99	129	74	63	51	57	33	24	53	66	2	26
21314	NM_183124	chr1	18241058	18255219	-	Defb41	Unmarked	1.771	0.281	6.424	0.333	122	112	55	49	105	127	68	49	53	48	40	23	59	61	1	27
21384	NM_001040027	chr1	18250604	18255219	-	Gm15386	Unmarked	1.771	0.281	6.424	0.333	122	112	55	49	105	127	68	49	53	48	40	23	59	61	1	27
3626	NM_153154	chr1	19093102	19156413	+	Tfap2d	H3K27me3-only	7.438	2.652	62.363	4.68	108	72	61	36	58	107	76	61	61	62	72	43	51	60	29	42
1441	NM_009334	chr1	19198994	19228815	+	Tfap2b	H3K27me3-only	7.438	1.248	85.916	3.952	86	86	55	38	70	102	109	57	60	87	36	43	48	63	26	33
2015	NM_001025305	chr1	19202134	19228815	+	Tfap2b	H3K27me3-only	3.896	0.741	78.689	4.4	58	43	74	46	39	95	62	98	54	52	43	50	70	105	19	91
9917	NM_153179	chr1	20047859	20608138	-	Pkhd1	Unmarked	5.667	1.347	27.568	1.077	77	43	93	59	40	89	79	53	74	52	63	60	82	77	14	44
15465	NR_045734	chr1	20346534	20382381	+	4930486I03Rik	Unmarked	0	0	13.115	0.813	123	79	78	45	65	67	84	57	74	51	51	41	64	75	4	41
13480	NR_029593	chr1	20669090	20669163	+	Mir206	Unmarked	0.708	0.144	17.13	0.842	100	47	111	46	41	60	66	67	97	43	55	43	66	84	6	67
14741	NR_029902	chr1	20672849	20672968	+	Mir133b	Unmarked	0.708	0.168	14.453	0.859	127	84	79	63	70	75	61	53	61	41	39	43	94	60	5	44
9062	NM_010552	chr1	20720985	20724577	+	Il17a	Unmarked	2.125	0.379	31.047	1.61	89	68	77	57	48	73	87	67	70	67	42	44	84	67	17	42
9404	NM_145856	chr1	20767229	20774351	-	Il17f	Unmarked	0.708	0.126	29.709	1.284	97	67	94	48	68	82	68	54	81	65	63	29	60	59	13	51
17232	NM_008563	chr1	20793094	20810294	-	Mcm3	H3K4me3-only	259.962	32.233	10.438	0.438	71	46	48	53	35	82	73	61	61	54	114	60	51	68	54	68
14777	NR_040492	chr1	20878730	20880554	-	6720483E21Rik	H3K4me3-only	201.878	18.57	14.453	0.606	37	35	53	63	22	49	61	74	48	34	75	83	82	88	50	145
14595	NM_028829	chr1	20880702	20928837	+	Paqr8	H3K4me3-only	240.837	22.893	14.721	0.575	50	34	95	27	21	39	77	49	86	60	144	79	49	53	54	82
16489	NM_027974	chr1	20941706	20980922	+	Efhc1	H3K4me3-only	122.544	24.963	11.509	0.556	42	27	68	48	29	53	62	84	47	46	75	82	67	102	44	123
11991	NM_177409	chr1	20991477	21069306	-	Tram2	H3K4me3-only	211.086	27.36	20.877	0.794	25	18	74	33	17	33	62	51	54	46	161	122	54	66	86	97
22837	NM_029398	chr1	21208711	21220248	+	Tmem14a	H3K4me3-only	119.002	19.963	5.621	0.356	69	52	71	54	39	67	62	79	64	32	67	64	74	96	27	82
18022	NM_010356	chr1	21230669	21255640	+	Gsta3	Unmarked	2.479	0.321	9.368	0.352	84	66	77	50	69	96	62	77	61	42	44	45	64	100	8	54
18244	NM_001077353	chr1	21230669	21255640	+	Gsta3	Unmarked	2.479	0.321	9.368	0.352	84	66	77	50	69	96	62	77	61	42	44	45	64	100	8	54
13823	NR_002858	chr1	21275326	21288393	-	Gm4956	Unmarked	0.708	0.119	16.327	1.012	62	52	45	46	45	142	89	94	39	58	32	43	59	117	7	69
29375	NM_183322	chr1	21339757	21342280	+	Khdc1a	Unmarked	1.771	1.262	0.803	0.382	109	49	89	49	45	96	63	65	70	47	73	41	73	77	5	48
29513	NM_001033904	chr1	21358411	21359824	+	Khdc1c	Unmarked	0.708	1.01	0.535	0.191	99	46	89	52	42	101	65	68	68	50	69	40	76	79	4	51
21116	NM_001113187	chr1	21373636	21376465	+	Khdc1b	Unmarked	0.708	0.673	6.691	0.83	59	55	86	42	52	107	78	72	67	56	72	47	64	90	6	46
1788	NM_023872	chr1	21388483	21952023	-	Kcnq5	Bivalent	88.189	17.965	81.098	4.057	34	20	75	48	13	22	60	47	67	40	120	110	63	59	83	138
1799	NM_001160139	chr1	21388483	21952023	-	Kcnq5	Bivalent	88.189	17.965	81.098	4.057	34	20	75	48	13	22	60	47	67	40	120	110	63	59	83	138
3665	NM_001012625	chr1	22278502	22812563	-	Rims1	H3K4me3-only	52.417	13.59	61.827	2.799	45	21	95	35	9	7	53	46	79	30	121	114	63	58	75	148
3666	NM_053270	chr1	22278502	22812563	-	Rims1	H3K4me3-only	52.417	13.59	61.827	2.799	45	21	95	35	9	7	53	46	79	30	121	114	63	58	75	148
3670	NM_001012623	chr1	22278502	22812563	-	Rims1	H3K4me3-only	52.417	13.59	61.827	2.799	45	21	95	35	9	7	53	46	79	30	121	114	63	58	75	148
3673	NM_183018	chr1	22278502	22812563	-	Rims1	H3K4me3-only	52.417	13.59	61.827	2.799	45	21	95	35	9	7	53	46	79	30	121	114	63	58	75	148
3682	NM_001012624	chr1	22278502	22812563	-	Rims1	H3K4me3-only	52.417	13.59	61.827	2.799	45	21	95	35	9	7	53	46	79	30	121	114	63	58	75	148
11328	NM_025746	chr1	23107312	23109092	-	4933415F23Rik	Unmarked	6.021	1.321	23.018	1.262	61	55	78	65	49	65	64	52	76	36	78	62	73	74	33	78
22241	NR_029533	chr1	23279107	23279178	+	Mir30a	Unmarked	0.708	0.126	5.888	0.295	121	81	69	48	83	133	69	57	48	62	26	38	67	66	10	21
23171	NR_029717	chr1	23298539	23298623	+	Mir30c-2	Unmarked	1.063	0.16	5.353	0.235	96	73	85	47	77	83	79	53	68	58	45	46	61	78	8	42
6102	NM_001081079	chr1	23373262	23390014	-	Ogfrl1	H3K4me3-only	98.106	27.974	45.233	2.186	10	16	67	34	13	32	60	38	64	33	168	139	40	62	108	115
1198	NM_172124	chr1	23768764	23854697	+	B3gat2	H3K4me3-only	159.732	18.98	89.663	2.973	30	20	71	70	12	48	52	72	61	31	77	93	88	84	62	128
8192	NM_028534	chr1	23852465	23929128	-	Smap1	H3K4me3-only	129.273	26.334	34.527	1.368	42	28	52	38	22	28	47	73	43	38	94	131	52	77	113	121
11832	NM_026503	chr1	24002777	24012479	-	1110058L19Rik	H3K4me3-only	196.565	26.693	21.412	1.152	82	55	76	47	50	89	61	53	65	51	72	71	64	58	50	55
3930	NM_026604	chr1	24017596	24107180	-	Fam135a	H3K4me3-only	228.795	46.607	59.954	1.965	26	23	64	39	14	31	53	62	66	35	142	117	46	71	101	109
9015	NM_007740	chr1	24184448	24259577	+	Col9a1	Unmarked	1.063	0.606	31.315	2.29	83	42	95	44	55	95	66	52	64	53	72	54	61	78	10	75
1084	NM_007733	chr1	24264521	24594276	-	Col19a1	Bivalent	40.73	7.259	91.537	4.746	75	58	64	70	50	66	81	43	70	47	60	73	72	69	45	56
13990	NM_026719	chr1	24685382	24823146	+	Lmbrd1	H3K4me3-only	197.628	24.504	16.059	0.727	54	44	58	46	30	62	61	79	50	53	92	80	68	73	64	85
3678	NM_175642	chr1	25124320	25886552	-	Bai3	Bivalent	61.272	12.482	61.827	3.093	51	33	65	34	23	92	57	66	53	40	104	90	56	73	62	100
18658	NM_001204913	chr1	25333248	25334799	-	Gm20172	Unmarked	1.063	0.758	8.832	0.7	105	86	80	58	77	66	81	33	74	51	67	39	73	54	3	52
9961	NM_001033764	chr1	26738645	26744305	-	4931408C20Rik	Unmarked	4.604	0.175	27.568	0.504	103	81	97	36	65	59	87	49	86	60	64	38	63	60	0	51
19650	NM_001013750	chr1	28832966	28837097	-	Gm597	Unmarked	0.354	0.126	7.762	0.582	89	74	94	49	56	85	81	48	90	50	67	37	70	62	2	45
24059	NM_001081080	chr1	30859186	30920101	-	Phf3	Unmarked	2.125	0.337	4.818	0.218	108	97	68	34	90	167	69	58	56	64	38	20	53	56	2	19
18796	NM_011200	chr1	30997147	31006600	-	Ptp4a1	H3K4me3-only	153.711	20.873	8.565	0.298	37	26	53	41	17	27	60	42	60	45	121	133	43	48	125	121
19149	NR_002688	chr1	30998436	31006555	-	Gm13363	H3K4me3-only	165.398	21.438	8.297	0.296	22	25	53	41	15	25	62	43	61	45	118	141	42	50	132	124
13197	NR_033445	chr1	31197922	31279501	-	4931428L18Rik	Unmarked	6.375	3.03	17.665	1.326	53	54	74	45	47	100	71	81	48	53	52	58	78	92	14	79
14570	NM_153601	chr1	31233279	31261570	+	Lgsn	Unmarked	0.708	0.144	14.721	0.84	97	70	69	48	61	104	100	46	62	80	59	38	64	58	10	33
13240	NM_029062	chr1	31279683	31281132	+	Pih1d3	Unmarked	4.958	2.828	17.665	1.399	98	60	100	49	45	56	75	47	94	41	84	53	69	67	13	48
25850	NR_015347	chr1	31321691	31324906	+	Gm4850	Unmarked	0	0	4.015	0.674	116	81	73	60	54	78	70	65	78	36	52	29	82	72	1	52
3691	NM_133235	chr1	32229650	32714583	+	Khdrbs2	H3K4me3-only	60.209	9.036	61.827	2.593	39	34	85	42	21	33	69	60	68	39	102	104	72	77	57	97
29451	NM_001199956	chr1	32576407	32577844	-	Gm9839	Unmarked	0.354	1.009	0.803	0.191	116	45	107	57	51	55	53	51	87	44	62	45	70	66	16	74
29246	NM_001164286	chr1	32600390	32604138	-	Gm5415	Unmarked	0	0	1.071	0.509	92	55	79	68	64	90	70	47	64	55	53	43	73	71	13	62
12468	NM_008922	chr1	33510655	33726603	-	Prim2	H3K4me3-only	306.713	43.735	19.806	0.689	77	32	69	54	30	60	61	59	53	49	102	81	72	70	52	78
12506	NR_033199	chr1	33726668	33727557	+	1700001G17Rik	H3K4me3-only	317.338	43.093	19.538	0.663	56	26	72	49	24	77	71	55	61	54	74	83	62	69	55	111
12090	NM_008999	chr1	33776740	33799409	+	Rab23	H3K4me3-only	210.378	21.426	20.609	0.877	30	29	54	46	26	71	72	61	48	63	105	108	54	67	93	72
11336	NM_001159729	chr1	33777263	33799409	+	Rab23	H3K4me3-only	280.504	31.995	23.018	0.924	57	41	51	38	36	83	73	54	59	52	101	100	35	70	86	63
3506	NM_145392	chr1	33802328	33814595	-	Bag2	H3K4me3-only	122.189	10.248	63.433	1.827	28	26	65	49	24	45	68	60	63	47	115	96	53	78	73	109
11285	NM_133817	chr1	33818597	33871272	-	Zfp451	H3K4me3-only	283.692	25.28	23.018	0.698	41	24	74	27	16	42	67	58	63	45	124	117	46	71	84	100
26650	NM_001161816	chr1	33892743	33895759	-	Gm15455	H3K4me3-only	18.417	5.836	3.479	1.102	50	46	95	44	32	59	74	63	84	60	95	64	69	63	39	62
2954	NM_177235	chr1	33908896	33964466	-	Bend6	H3K4me3-only	138.481	19.746	68.251	2.29	28	29	60	42	16	43	60	47	56	38	137	129	58	56	104	96
3463	NM_001276764	chr1	33965069	34365507	+	Dst	H3K4me3-only	100.939	31.983	63.701	2.064	19	23	55	29	13	40	56	64	46	37	84	151	48	73	122	139
15855	NM_133833	chr1	34068669	34365507	+	Dst	H3K4me3-only	221.357	45.092	12.312	0.516	32	23	64	41	29	39	65	45	49	47	134	103	50	69	70	139
15877	NM_134448	chr1	34068669	34365507	+	Dst	H3K4me3-only	221.357	45.092	12.312	0.516	32	23	64	41	29	39	65	45	49	47	134	103	50	69	70	139
11660	NM_010081	chr1	34217174	34240748	+	Dst	Unmarked	7.438	1.631	21.947	0.834	50	54	72	44	51	105	91	64	54	67	56	63	65	85	22	56
10128	NR_039562	chr1	34489965	34490044	-	Mir5103	H3K4me3-only	86.064	8.181	27.033	0.838	59	36	67	56	42	84	63	74	66	46	65	56	52	97	38	98
29107	NM_027159	chr1	34493514	34496517	-	Ccdc115	H3K4me3-only	463.965	44.103	1.338	0.054	50	34	79	53	28	45	57	65	72	43	97	87	67	73	66	83
29144	NM_178601	chr1	34496673	34502592	+	Imp4	H3K4me3-only	460.069	39.757	1.338	0.056	50	42	71	48	37	53	72	66	69	58	88	79	56	75	62	73
2268	NM_011206	chr1	34516590	34530624	+	Ptpn18	H3K4me3-only	170.357	20.242	75.745	2.298	36	29	75	50	21	46	60	80	65	43	90	85	68	89	59	103
4825	NM_009355	chr1	34555274	34559907	+	Prss39	Unmarked	10.271	1.831	52.995	2.606	45	50	75	54	42	72	82	58	58	61	88	61	79	71	23	80
9478	NM_007685	chr1	34592492	34601156	+	Cfc1	Unmarked	3.188	1.01	29.442	1.473	50	57	79	46	43	78	76	75	57	47	64	63	81	90	13	80
5641	NM_009356	chr1	34609176	34617788	-	Prss40	H3K27me3-only	11.688	1.587	47.909	3.595	49	36	92	52	27	75	77	55	75	61	91	62	78	62	28	79
4549	NM_213727	chr1	34636537	34647789	+	Amer3	H3K4me3-only	115.46	18.292	55.136	2.457	40	34	76	39	29	43	71	60	68	54	121	86	51	72	61	94
2399	NR_033627	chr1	34690379	34693055	-	AA619741	H3K27me3-only	9.208	2.387	74.139	4.066	66	33	106	53	33	49	69	43	92	28	92	83	67	84	28	73
14266	NM_183019	chr1	34858566	34869599	+	Arhgef4	H3K4me3-only	147.336	16.159	15.524	0.515	39	35	76	51	26	39	71	54	55	43	99	97	80	74	48	112
27552	NM_001160235	chr1	34870062	34899895	-	Fam168b	H3K4me3-only	165.398	20.508	2.944	0.108	61	24	68	49	28	32	41	49	48	42	139	126	64	52	107	69
27832	NM_174997	chr1	34870062	34899895	-	Fam168b	H3K4me3-only	165.398	20.508	2.944	0.108	61	24	68	49	28	32	41	49	48	42	139	126	64	52	107	69
27855	NM_001160236	chr1	34870062	34899895	-	Fam168b	H3K4me3-only	165.398	20.508	2.944	0.108	61	24	68	49	28	32	41	49	48	42	139	126	64	52	107	69
26800	NM_145516	chr1	34906803	34936430	+	Plekhb2	H3K4me3-only	104.835	16.609	3.479	0.12	29	41	53	48	40	87	63	81	42	41	41	76	60	102	43	152
26942	NM_175421	chr1	34906803	34928402	+	Plekhb2	H3K4me3-only	104.835	16.609	3.479	0.12	29	41	53	48	40	87	63	81	42	41	41	76	60	102	43	152
20985	NM_015818	chr1	36125244	36163291	+	Hs6st1	H3K4me3-only	143.44	20.453	6.691	0.258	33	16	62	47	16	19	52	41	58	39	132	142	50	55	125	112
20298	NM_198899	chr1	36196872	36301147	-	Uggt1	H3K4me3-only	310.255	52.047	7.227	0.261	47	24	73	40	26	82	70	61	69	51	107	87	41	83	64	74
4759	NM_153408	chr1	36321446	36330270	-	Neurl3	Unmarked	12.042	3.816	53.53	2.88	57	39	83	51	31	58	72	69	65	50	96	65	77	83	26	77
5244	NM_001172205	chr1	36364577	36380874	+	Arid5a	H3K4me3-only	152.294	18.096	50.318	1.816	44	28	71	47	29	58	59	74	50	49	104	98	67	84	67	70
5250	NM_001172206	chr1	36364577	36380874	+	Arid5a	H3K4me3-only	152.294	18.096	50.318	1.816	44	28	71	47	29	58	59	74	50	49	104	98	67	84	67	70
5262	NM_145996	chr1	36364577	36380874	+	Arid5a	H3K4me3-only	152.294	18.096	50.318	1.816	44	28	71	47	29	58	59	74	50	49	104	98	67	84	67	70
5277	NR_033310	chr1	36364577	36380874	+	Arid5a	H3K4me3-only	152.294	18.096	50.318	1.816	44	28	71	47	29	58	59	74	50	49	104	98	67	84	67	70
10682	NM_172652	chr1	36392574	36426026	-	Kansl3	H3K4me3-only	165.398	19.653	24.892	0.816	31	20	65	29	15	50	50	69	61	44	151	109	38	70	99	98
7538	NM_001277076	chr1	36429135	36478955	+	Fer1l5	Unmarked	1.771	0.23	38.006	1.465	101	58	76	46	40	61	81	76	67	60	60	42	73	79	12	67
19141	NM_001013374	chr1	36480030	36502084	-	Lman2l	H3K4me3-only	231.628	33.028	8.297	0.278	55	33	81	40	34	63	60	62	68	51	131	75	52	72	54	68
2199	NM_033570	chr1	36528441	36565621	+	Cnnm4	Bivalent	225.608	35.743	76.548	3.307	39	22	76	42	19	28	53	42	63	37	158	129	57	56	100	78
15305	NM_001039551	chr1	36568720	36585082	+	Cnnm3	H3K4me3-only	187.711	26.766	13.383	0.496	32	13	65	36	16	40	70	36	48	38	121	147	50	70	99	118
15345	NM_053186	chr1	36568720	36585082	+	Cnnm3	H3K4me3-only	187.711	26.766	13.383	0.496	32	13	65	36	16	40	70	36	48	38	121	147	50	70	99	118
5567	NM_153502	chr1	36587378	36592574	-	Ankrd23	H3K27me3-only	1.417	0.269	48.445	3.14	42	43	101	35	31	58	91	60	73	71	108	62	76	68	13	67
9491	NM_026241	chr1	36595017	36604046	-	Ankrd39	H3K4me3-only	117.231	13.93	29.442	0.943	39	26	82	47	27	43	79	57	74	57	122	86	53	80	57	70
3622	NM_001126047	chr1	36605484	36615226	-	Sema4c	H3K4me3-only	186.649	19.714	62.363	2.044	40	8	87	40	16	36	59	54	60	54	122	109	58	67	77	112
16897	NM_001126046	chr1	36619540	36740028	-	Fam178b	H3K4me3-only	114.398	14.828	10.974	0.292	49	31	66	48	24	51	72	73	46	57	87	85	75	80	50	105
16518	NM_027957	chr1	36619540	36650177	-	Fam178b	Unmarked	1.417	0.505	11.241	0.697	60	41	87	49	41	70	82	60	61	52	64	64	75	89	8	96
16797	NM_201365	chr1	36656818	36740028	-	Fam178b	H3K4me3-only	114.398	14.828	10.974	0.292	49	31	66	48	24	51	72	73	46	57	87	85	75	80	50	105
24253	NM_009942	chr1	36748331	36750233	+	Cox5b	H3K4me3-only	180.982	17.204	4.818	0.172	60	26	60	63	28	42	77	50	59	56	107	91	62	72	69	77
26792	NM_146107	chr1	36756046	36766770	-	Actr1b	H3K4me3-only	285.108	27.102	3.479	0.11	61	38	60	48	29	50	66	67	51	47	104	85	66	77	56	94
12059	NR_040290	chr1	36771382	36814805	+	4933424G06Rik	Unmarked	2.125	0.606	20.877	1.24	59	54	67	59	46	74	78	79	53	54	54	46	81	95	9	91
4927	NM_009539	chr1	36818705	36839661	+	Zap70	Unmarked	9.563	1.049	52.46	2.137	45	27	71	47	30	60	91	68	52	64	98	70	63	98	23	92
19434	NM_018872	chr1	36849033	36996372	-	Tmem131	H3K4me3-only	369.401	65.835	8.03	0.236	12	12	52	39	10	18	46	54	55	40	132	145	38	58	142	146
6173	NM_009918	chr1	37276105	37320229	+	Cnga3	Unmarked	3.188	0.606	44.965	2.29	62	42	78	44	33	93	69	84	58	48	64	59	73	96	17	79
5998	NM_030266	chr1	37356737	37467580	+	Inpp4a	H3K4me3-only	196.92	20.798	45.768	1.74	61	31	74	34	33	44	70	49	63	65	147	89	44	55	73	67
8774	NM_172971	chr1	37426065	37461284	+	Inpp4a	Unmarked	2.479	0.353	32.118	1.728	47	51	81	35	30	71	101	84	65	71	71	56	71	93	11	61
25379	NM_198006	chr1	37473929	37486948	-	Coa5	H3K4me3-only	415.09	28.87	4.282	0.119	40	22	69	58	31	43	67	56	56	58	87	98	61	74	77	102
24254	NM_026123	chr1	37487016	37495969	+	Unc50	H3K4me3-only	421.11	29.288	4.818	0.133	42	21	71	58	31	38	60	51	55	56	112	103	64	65	84	88
9265	NM_173870	chr1	37496184	37593104	-	Mgat4a	Unmarked	1.771	0.388	30.245	1.76	83	58	65	51	40	141	84	52	73	48	57	43	61	71	15	57
10936	NR_024017	chr1	37542695	37545450	-	4930594C11Rik	Unmarked	6.021	1.908	24.089	1.402	95	43	81	70	31	45	75	46	70	51	83	66	93	57	32	61
1449	NM_028096	chr1	37668520	37776656	-	2010300C02Rik	Bivalent	120.418	28.616	85.916	3.356	16	14	78	45	16	26	50	48	57	50	118	131	64	50	110	126
12803	NM_207228	chr1	37811620	37921924	-	Tsga10	H3K4me3-only	157.961	16.087	18.736	0.703	24	17	90	37	19	15	58	44	80	42	164	122	45	62	95	85
16150	NM_001037918	chr1	37929050	37933143	+	Lipt1	H3K4me3-only	138.127	14.589	12.044	0.395	66	40	81	40	43	86	80	55	66	62	96	70	53	76	36	49
25749	NM_026913	chr1	37935734	37947256	-	Mitd1	H3K4me3-only	392.068	44.721	4.015	0.168	89	44	78	61	41	72	56	61	67	52	67	71	74	63	56	47
25219	NM_027098	chr1	37947397	37955178	+	Mrpl30	H3K4me3-only	418.277	45.874	4.282	0.174	65	36	67	51	35	94	80	64	67	65	52	73	52	78	58	62
2857	NM_001033427	chr1	37962767	37973338	-	Lyg2	H3K27me3-only	1.417	0.337	69.054	3.077	80	66	92	49	57	66	74	67	68	51	62	54	82	81	7	43
17184	NM_027111	chr1	38003582	38014604	-	Lyg1	Unmarked	2.833	0.735	10.438	0.382	87	88	58	40	63	104	70	87	70	35	42	29	53	98	6	69
22640	NM_172054	chr1	38040711	38054053	-	Txndc9	H3K4me3-only	260.316	26.511	5.621	0.167	67	48	79	44	53	51	61	66	60	71	86	63	57	61	55	77
19924	NM_198303	chr1	38054854	38112424	+	Eif5b	H3K4me3-only	303.88	26.26	7.494	0.21	39	36	65	44	28	53	60	57	71	52	127	93	46	57	91	80
12910	NM_019570	chr1	38109630	38186507	-	Rev1	H3K4me3-only	128.21	30.468	18.468	0.667	6	8	49	25	9	10	49	40	45	44	160	178	28	45	170	133
8506	NM_010678	chr1	38234171	38721800	-	Aff3	Unmarked	1.771	0.631	33.189	1.856	64	56	75	71	50	42	103	54	60	93	71	42	92	57	17	52
13442	NM_001029878	chr1	38851353	38878060	-	Lonrf2	Unmarked	1.417	0.192	17.13	0.651	80	87	64	42	70	130	77	73	58	53	29	39	65	80	10	42
8683	NM_145142	chr1	38920717	38955005	-	Chst10	H3K4me3-only	163.982	33.404	32.386	1.443	66	40	66	42	29	64	81	49	66	55	100	89	52	64	64	72
5763	NM_001011684	chr1	38995993	39007121	+	Nms	Unmarked	1.417	0.238	47.107	2.687	66	70	70	50	55	80	75	80	70	47	56	45	65	93	16	61
19493	NM_026850	chr1	39044658	39054081	+	Pdcl3	H3K4me3-only	296.796	27.302	8.03	0.273	52	31	70	49	28	59	64	67	63	50	100	78	59	79	57	93
973	NM_008719	chr1	39251116	39420085	+	Npas2	Bivalent	183.461	29.065	94.213	3.019	29	9	75	39	19	39	56	46	60	43	133	123	43	70	95	120
18341	NM_001252218	chr1	39424695	39428755	+	Rpl31	H3K4me3-only	270.587	38.584	9.1	0.268	44	36	45	48	29	57	63	72	56	48	93	88	43	80	84	113
18355	NM_001252219	chr1	39424695	39428755	+	Rpl31	H3K4me3-only	270.587	38.584	9.1	0.268	44	36	45	48	29	57	63	72	56	48	93	88	43	80	84	113
18435	NM_053257	chr1	39424695	39428755	+	Rpl31	H3K4me3-only	270.587	38.584	9.1	0.268	44	36	45	48	29	57	63	72	56	48	93	88	43	80	84	113
14288	NM_018775	chr1	39428341	39535592	-	Tbc1d8	H3K4me3-only	196.565	28.029	15.524	0.533	49	19	69	36	22	56	59	56	56	46	130	114	46	72	88	81
23365	NM_028043	chr1	39592646	39603722	+	Cnot11	H3K4me3-only	319.463	43.382	5.353	0.193	28	25	65	46	23	44	45	66	58	33	108	124	55	76	104	99
20404	NR_028555	chr1	39605591	39605685	-	Snord89	Unmarked	1.417	0.253	7.227	0.332	66	47	78	60	45	73	88	61	64	51	57	60	76	95	10	68
14029	NM_001033135	chr1	39608143	39634192	-	Rnf149	H3K4me3-only	136.71	22.934	16.059	0.498	44	11	59	50	15	41	62	51	48	50	106	133	57	67	110	95
6529	NM_170597	chr1	39675250	39708027	-	Creg2	H3K4me3-only	118.293	16.868	42.824	1.546	84	28	79	55	25	32	77	47	70	54	88	92	68	66	60	74
9679	NM_001145660	chr1	39722145	39777834	-	Rfx8	H3K4me3-only	93.147	12.649	28.639	1.361	51	30	63	58	25	58	74	52	58	57	106	71	68	65	48	115
8580	NM_001177348	chr1	39860985	39862177	-	Gm3646	Unmarked	1.063	0.117	32.921	1.805	79	64	77	48	58	70	75	58	49	51	58	63	81	76	11	81
5339	NR_040465	chr1	39899272	39904175	-	1700066B17Rik	Unmarked	1.771	0.561	49.783	2.839	65	72	77	54	63	90	73	54	62	53	64	48	78	66	12	68
13914	NM_001252201	chr1	39957757	40083155	+	Map4k4	H3K4me3-only	170.357	69.392	16.059	0.595	20	10	45	34	5	17	35	56	56	33	156	146	28	53	155	150
13944	NM_001252202	chr1	39957757	40083155	+	Map4k4	H3K4me3-only	170.357	69.392	16.059	0.595	20	10	45	34	5	17	35	56	56	33	156	146	28	53	155	150
13986	NM_008696	chr1	39957757	40083155	+	Map4k4	H3K4me3-only	170.357	69.392	16.059	0.595	20	10	45	34	5	17	35	56	56	33	156	146	28	53	155	150
14011	NM_001252200	chr1	39957757	40083155	+	Map4k4	H3K4me3-only	170.357	69.392	16.059	0.595	20	10	45	34	5	17	35	56	56	33	156	146	28	53	155	150
5894	NR_037980	chr1	40133056	40142696	-	Gm16894	H3K4me3-only	32.584	4.425	46.571	1.795	102	47	104	46	34	29	63	64	89	44	83	62	74	70	28	60
5273	NM_010555	chr1	40141612	40182070	+	Il1r2	Unmarked	2.479	0.505	50.318	2.278	66	40	96	66	35	71	62	63	62	52	93	50	104	68	7	64
8592	NM_008362	chr1	40281924	40373022	+	Il1r1	Unmarked	2.833	0.808	32.921	1.956	63	53	82	47	51	83	86	55	62	68	83	56	69	71	18	52
7262	NM_001123382	chr1	40323430	40373022	+	Il1r1	H3K4me3-only	82.168	8.079	39.077	1.506	39	34	89	38	23	46	91	49	71	63	99	86	66	66	40	99
2417	NM_133193	chr1	40381471	40422316	+	Il1rl2	Unmarked	11.688	1.587	74.139	2.782	81	52	71	65	56	109	66	62	59	61	62	41	73	71	24	46
9448	NM_010743	chr1	40496493	40505207	+	Il1rl1	Unmarked	3.188	0.758	29.442	1.646	100	69	72	45	50	83	86	56	69	54	64	48	66	70	13	54
9517	NM_001025602	chr1	40497472	40522259	+	Il1rl1	Unmarked	1.063	0.202	29.174	1.46	81	85	58	50	78	146	78	60	55	60	43	32	61	71	10	31
8666	NM_001161842	chr1	40522396	40548423	+	Il18r1	Unmarked	5.667	1.347	32.653	2.069	56	36	76	30	40	98	81	79	45	68	72	65	57	96	21	79
8606	NM_001161843	chr1	40522465	40548425	+	Il18r1	Unmarked	6.375	1.653	32.921	1.997	59	37	73	28	40	101	80	83	44	66	73	65	54	99	22	75
9585	NM_008365	chr1	40522850	40557699	+	Il18r1	Unmarked	7.792	2.469	29.174	1.698	41	24	80	37	29	63	102	81	51	84	77	67	61	104	20	78
9965	NM_010553	chr1	40572206	40606142	+	Il18rap	Unmarked	3.542	0.777	27.568	1.512	104	55	77	45	60	129	67	58	60	54	56	40	57	77	9	51
9233	NM_177084	chr1	40637071	40687576	+	Slc9a4	Unmarked	10.271	1.22	30.245	1.54	76	60	76	49	38	82	75	74	67	53	60	55	79	75	24	56
2877	NM_001033289	chr1	40738556	40825730	+	Slc9a2	H3K4me3-only	94.564	14.982	69.054	2.626	15	12	53	44	12	19	72	50	46	57	125	128	51	65	107	143
9874	NM_172499	chr1	40828884	40847502	-	Mfsd9	H3K4me3-only	125.731	10.865	27.836	1.005	54	31	66	61	41	62	81	61	48	62	76	75	69	89	39	84
4741	NM_001081198	chr1	40862445	40912112	+	Tmem182	H3K27me3-only	6.375	1.653	53.798	3.335	57	59	80	39	41	106	71	75	68	52	71	56	69	77	24	54
15613	NR_040475	chr1	41224404	41238097	-	4930448I06Rik	Unmarked	1.063	0.276	12.847	0.964	57	89	59	31	72	164	94	68	52	81	43	23	55	64	3	44
2064	NR_027826	chr1	42705044	42751670	-	2610017I09Rik	H3K4me3-only	101.647	14.494	78.154	2.894	47	28	58	34	26	62	93	61	50	80	85	89	44	72	68	102
1943	NM_008900	chr1	42753990	42757054	+	Pou3f3	Bivalent	59.147	18.741	79.225	3.586	13	12	62	34	7	5	50	27	55	22	185	173	46	49	139	120
1663	NR_027891	chr1	42757180	42760021	+	2900092D14Rik	H3K27me3-only	3.896	0.794	82.972	4.225	93	95	52	30	78	172	74	70	50	58	26	29	49	70	10	43
16513	NM_023514	chr1	42908077	42962528	+	Mrps9	H3K4me3-only	286.879	30.3	11.241	0.401	54	20	101	36	24	53	76	53	74	59	112	87	59	74	42	75
2330	NM_053107	chr1	43009716	43092294	+	Gpr45	Bivalent	79.689	12.625	74.942	3.053	32	20	63	61	19	37	58	67	46	47	139	85	79	76	57	113
27014	NM_001013025	chr1	43104113	43155467	-	Tgfbrap1	H3K4me3-only	399.86	40.723	3.479	0.113	39	34	82	45	28	44	61	73	68	51	79	86	65	77	62	105
26269	NM_133818	chr1	43155554	43172791	+	AI597479	H3K4me3-only	412.256	43.542	3.747	0.123	48	33	77	49	24	37	64	72	74	44	107	84	61	82	62	81
2062	NM_010212	chr1	43179918	43220806	-	Fhl2	Bivalent	123.96	18.604	78.154	3.98	41	33	89	59	25	28	65	46	79	45	115	91	76	58	62	87
13134	NM_010879	chr1	43502595	43627363	+	Nck2	H3K4me3-only	236.941	67.562	17.933	0.752	38	18	63	29	19	22	62	40	50	48	172	129	41	55	103	110
8655	NM_024283	chr1	43787446	43799409	+	1500015O10Rik	Unmarked	18.417	2.626	32.653	1.433	67	33	71	45	25	70	97	61	56	55	80	79	67	96	22	75
17125	NM_026430	chr1	43807075	43884553	-	Uxs1	H3K4me3-only	235.879	28.027	10.706	0.382	39	19	62	53	17	37	70	38	52	48	123	132	66	58	99	86
24949	NM_009418	chr1	43990851	44059816	+	Tpp2	H3K4me3-only	397.735	40.507	4.55	0.151	36	18	62	55	19	45	50	74	50	51	103	97	65	74	87	113
10335	NM_001013799	chr1	44066252	44076851	-	Mettl21c	Unmarked	1.063	0.189	26.23	1.411	88	71	73	54	67	100	77	56	65	58	78	31	66	72	3	40
22407	NM_029368	chr1	44143461	44159233	-	Tex30	H3K4me3-only	277.317	35.945	5.888	0.271	45	20	105	33	21	62	51	50	101	54	102	101	35	48	101	70
25351	NM_023645	chr1	44163390	44175618	-	Kdelc1	H3K4me3-only	317.338	41.133	4.282	0.137	61	39	81	63	47	70	63	55	74	51	84	63	63	74	44	67
19263	NM_144558	chr1	44176812	44201616	+	Bivm	H3K4me3-only	173.544	14.555	8.03	0.254	34	36	80	32	33	51	68	78	50	51	109	83	65	93	36	100
17027	NM_011729	chr1	44204588	44238105	+	Ercc5	H3K4me3-only	231.628	30.023	10.706	0.402	64	35	60	44	20	66	76	68	57	59	97	89	62	69	69	64
16578	NM_207281	chr1	44260914	44275776	-	Mettl21e	Unmarked	1.771	0.388	11.241	0.654	83	77	83	53	86	103	83	52	63	69	47	35	64	76	1	24
14791	NM_028450	chr1	44608515	44853681	+	Gulp1	H3K4me3-only	194.795	29.235	14.185	0.499	76	18	112	42	24	57	53	51	94	45	95	72	54	65	46	95
25037	NR_040602	chr1	44796519	44801794	-	4930521E06Rik	Unmarked	0.354	0.053	4.282	0.207	105	100	64	49	93	109	75	53	62	48	38	34	59	72	5	33
18712	NM_009930	chr1	45368382	45406551	+	Col3a1	Unmarked	1.771	0.421	8.832	0.45	91	69	71	46	62	118	79	67	56	61	57	39	68	78	7	30
16223	NM_007737	chr1	45431175	45560127	-	Col5a2	H3K4me3-only	27.625	5.252	11.777	0.473	127	51	81	44	44	87	78	59	71	55	65	48	61	74	15	39
29202	NM_028599	chr1	45852345	45880458	+	Wdr75	H3K4me3-only	359.485	44.573	1.338	0.055	63	33	77	41	36	50	64	55	62	59	106	92	53	63	72	73
5474	NM_016917	chr1	45964914	45982439	-	Slc40a1	H3K4me3-only	184.878	21.967	48.98	1.94	56	33	78	33	35	71	78	58	61	57	92	89	49	81	50	78
21501	NR_037690	chr1	46077259	46087282	-	Gm4776	Unmarked	0.354	1.009	6.424	0.797	88	64	86	52	51	64	79	63	66	56	62	55	85	73	11	44
21631	NR_037691	chr1	46077259	46087282	-	Gm4776	Unmarked	0.354	1.009	6.424	0.797	88	64	86	52	51	64	79	63	66	56	62	55	85	73	11	44
25448	NM_001160386	chr1	46123582	46430395	+	Dnah7b	H3K4me3-only	39.313	16.013	4.282	0.581	79	46	100	48	42	59	64	52	79	45	78	68	73	67	28	71
19684	NM_172653	chr1	46864388	46910354	-	Slc39a10	H3K4me3-only	189.128	26.968	7.762	0.321	29	14	71	35	21	24	54	37	55	51	139	148	44	48	129	100
2632	NM_019790	chr1	50984366	51244114	+	Tmeff2	Bivalent	142.731	21.421	71.463	3.774	19	22	66	40	15	32	73	75	52	40	82	118	60	101	72	132
8220	NR_045151	chr1	51275229	51390623	-	9330175M20Rik	Unmarked	6.021	1.145	34.527	1.931	69	72	74	48	59	99	79	54	66	56	65	52	69	63	22	52
7385	NM_138741	chr1	51345969	51359804	+	Sdpr	Unmarked	9.917	2.02	38.542	1.963	85	37	91	58	32	66	72	59	63	46	57	71	92	80	17	73
21167	NM_028696	chr1	51526331	51535243	-	Nabp1	H3K4me3-only	178.503	31.813	6.691	0.212	32	17	62	42	19	86	79	61	62	61	105	89	39	81	72	92
13131	NM_010863	chr1	51806609	51972818	-	Myo1b	H3K4me3-only	273.067	38.937	17.933	0.55	30	32	63	36	20	41	74	59	51	58	113	115	59	63	87	98
13142	NM_001161817	chr1	51806609	51972818	-	Myo1b	H3K4me3-only	273.067	38.937	17.933	0.55	30	32	63	36	20	41	74	59	51	58	113	115	59	63	87	98
17909	NM_011487	chr1	52065087	52164028	+	Stat4	H3K4me3-only	23.021	3.126	9.635	0.335	66	43	95	59	44	60	90	53	83	66	72	48	69	78	12	61
10811	NM_001205314	chr1	52176281	52218709	+	Stat1	H3K4me3-only	231.983	31.502	24.624	0.878	46	28	71	46	28	75	79	61	59	51	76	92	58	88	53	88
10827	NM_009283	chr1	52176281	52218709	+	Stat1	H3K4me3-only	231.983	31.502	24.624	0.878	46	28	71	46	28	75	79	61	59	51	76	92	58	88	53	88
10574	NM_001205313	chr1	52176465	52218709	+	Stat1	H3K4me3-only	260.671	33.788	25.427	0.954	47	33	65	47	31	72	77	58	58	50	75	93	56	82	60	95
18590	NM_001081081	chr1	52220293	52290076	-	Gls	H3K4me3-only	128.919	19.348	8.832	0.293	19	17	74	35	12	29	52	57	62	36	141	131	52	67	104	111
18670	NM_001113383	chr1	52242124	52290076	-	Gls	H3K4me3-only	128.919	19.348	8.832	0.293	19	17	74	35	12	29	52	57	62	36	141	131	52	67	104	111
6315	NM_008667	chr1	52512692	52557292	-	Nab1	H3K4me3-only	130.335	21.865	44.162	1.774	20	11	67	29	10	25	41	47	62	41	158	136	36	46	131	139
15513	NR_024590	chr1	52687548	52708763	+	Tmem194b	H3K4me3-only	254.295	31.531	12.847	0.431	72	35	69	41	31	75	76	56	56	45	83	94	58	83	49	76
15570	NM_001142647	chr1	52687548	52708763	+	Tmem194b	H3K4me3-only	254.295	31.531	12.847	0.431	72	35	69	41	31	75	76	56	56	45	83	94	58	83	49	76
3270	NM_133829	chr1	52713147	52784162	-	Mfsd6	H3K4me3-only	167.169	21.668	65.307	2.388	30	25	71	40	18	35	49	55	53	39	117	121	65	57	93	131
3265	NM_178081	chr1	52716829	52784162	-	Mfsd6	H3K4me3-only	167.169	21.668	65.307	2.388	30	25	71	40	18	35	49	55	53	39	117	121	65	57	93	131
7194	NM_008384	chr1	52846263	52874532	-	Inpp1	H3K4me3-only	128.919	19.348	39.612	1.686	57	24	63	51	18	47	59	74	54	32	82	96	66	94	60	122
25371	NM_146108	chr1	52901889	52977704	+	Hibch	H3K4me3-only	136.356	18.517	4.282	0.194	30	35	50	44	45	100	76	81	33	58	74	78	51	109	43	92
25249	NM_144953	chr1	52981970	53009684	-	1700019D03Rik	H3K4me3-only	321.942	35.308	4.282	0.14	29	30	78	42	20	56	84	52	64	53	122	92	66	74	47	90
8261	NM_010834	chr1	53118506	53124923	+	Mstn	Unmarked	2.479	0.393	34.259	1.32	123	81	72	61	75	90	64	52	66	45	38	44	74	65	18	31
16821	NM_027070	chr1	53215420	53244461	-	1700019A02Rik	Unmarked	8.5	2.02	10.974	0.54	67	57	74	56	60	90	71	58	58	59	72	44	69	74	16	74
23479	NM_153556	chr1	53246031	53353840	-	Pms1	H3K4me3-only	327.963	37.409	5.085	0.177	61	28	77	41	34	63	69	50	53	51	77	110	58	74	69	84
23631	NM_145517	chr1	53353938	53367089	+	Ormdl1	H3K4me3-only	341.068	37.406	5.085	0.184	49	27	72	55	40	60	62	51	45	45	84	114	69	80	71	75
25968	NM_028091	chr1	53370506	53380908	+	Osgepl1	H3K4me3-only	211.086	27.36	4.015	0.155	72	47	69	55	47	103	84	52	65	63	73	55	59	73	30	52
28293	NM_133728	chr1	53401487	53409543	-	Asnsd1	H3K4me3-only	182.753	28.953	2.409	0.146	63	39	108	44	29	51	58	43	95	43	119	76	67	48	48	68
16108	NM_001252070	chr1	53453845	53763628	-	Dnah7a	H3K4me3-only	47.813	10.488	12.044	1.145	68	37	85	52	30	69	72	63	69	59	71	70	75	68	42	69
13247	NM_133810	chr1	53812355	53842059	-	Stk17b	H3K4me3-only	176.378	25.15	17.665	0.95	44	21	73	45	24	38	57	64	60	62	103	96	55	62	88	107
2105	NM_001001883	chr1	53863717	54251878	-	Hecw2	H3K4me3-only	153.711	24.352	77.619	2.991	32	31	59	44	25	32	50	56	59	41	106	125	50	59	116	114
2095	NM_172655	chr1	53987658	54251878	-	Hecw2	H3K4me3-only	153.711	24.352	77.619	2.991	32	31	59	44	25	32	50	56	59	41	106	125	50	59	116	114
17610	NM_030025	chr1	54307526	54425571	+	Ccdc150	H3K4me3-only	81.814	8.641	9.903	0.421	64	27	69	54	34	96	68	63	60	52	81	65	57	85	40	84
26586	NM_001033194	chr1	54454424	54495815	-	Gtf3c3	H3K4me3-only	274.483	52.183	3.479	0.168	89	37	77	50	40	57	67	61	66	54	80	63	58	77	39	84
11179	NM_001163314	chr1	54529843	54614528	-	Pgap1	H3K4me3-only	198.336	33.272	23.286	0.977	27	27	48	43	17	54	64	97	44	39	78	95	57	113	65	131
3296	NM_001081433	chr1	54702183	54983231	-	Ankrd44	H3K4me3-only	238.358	30.895	65.307	2.217	29	18	80	24	18	29	63	44	64	55	158	136	40	51	112	78
24306	NM_031179	chr1	55042012	55084322	-	Sf3b1	H3K4me3-only	347.089	30.929	4.818	0.151	32	19	56	37	28	76	61	82	47	51	87	106	37	102	86	92
17488	NM_001039710	chr1	55109613	55129546	+	Coq10b	H3K4me3-only	311.671	52.285	10.171	0.337	34	22	81	43	21	25	54	59	69	61	136	102	56	52	97	87
17496	NM_026424	chr1	55109613	55129546	+	Coq10b	H3K4me3-only	311.671	52.285	10.171	0.337	34	22	81	43	21	25	54	59	69	61	136	102	56	52	97	87
28412	NM_010477	chr1	55134677	55144776	-	Hspd1	H3K4me3-only	341.068	54.035	2.409	0.087	23	8	66	49	8	25	50	44	62	32	158	144	53	63	121	93
28864	NM_008303	chr1	55144991	55148161	+	Hspe1	H3K4me3-only	336.463	59.965	1.874	0.067	23	11	59	28	8	28	58	67	41	52	104	144	49	70	120	137
26638	NM_025283	chr1	55188088	55211743	+	Mob4	H3K4me3-only	286.171	38.861	3.479	0.114	26	26	62	41	23	44	66	58	51	42	109	117	56	79	82	117
10520	NM_028713	chr1	55227003	55283626	-	Rftn2	H3K4me3-only	49.938	7.121	25.694	1.11	86	30	48	38	31	86	51	153	40	42	31	42	45	164	25	87
21064	NM_175439	chr1	55294020	55296902	+	Mars2	H3K4me3-only	235.524	23.987	6.691	0.236	45	33	52	60	27	73	58	66	50	49	71	100	68	69	89	89
1399	NM_029267	chr1	55356912	55420313	-	Boll	Bivalent	87.126	14.616	86.451	3.735	27	11	75	34	11	29	56	57	66	42	112	134	43	70	111	121
1638	NM_001113367	chr1	55356912	55419551	-	Boll	Bivalent	39.667	6.654	83.239	3.828	35	19	68	38	15	43	60	55	61	45	124	111	49	65	90	121
1574	NM_001114663	chr1	55462789	55811129	+	Plcl1	Bivalent	183.815	21.841	84.042	3.153	32	17	44	46	17	47	64	80	35	45	83	119	54	99	92	125
15662	NR_045837	chr1	55988084	56028942	+	9130227L01Rik	Unmarked	1.771	0.421	12.58	0.92	96	70	101	52	72	79	62	45	73	46	65	48	79	63	4	44
10749	NM_027661	chr1	56692892	56694295	-	Hsfy2	Unmarked	4.604	0.875	24.892	1.183	91	72	76	43	62	139	84	45	80	58	68	31	48	61	10	31
4122	NM_139146	chr1	56850824	57028178	-	Satb2	H3K4me3-only	80.397	8.188	58.348	1.733	54	16	72	50	20	46	43	92	62	35	82	78	55	104	60	130
4264	NR_024326	chr1	57028312	57032040	+	9130024F11Rik	H3K4me3-only	87.48	9.24	57.277	1.65	49	22	92	35	22	56	56	63	82	47	143	75	45	71	57	84
4273	NR_024325	chr1	57028312	57032040	+	9130024F11Rik	H3K4me3-only	87.48	9.24	57.277	1.65	49	22	92	35	22	56	56	63	82	47	143	75	45	71	57	84
8713	NR_037990	chr1	57257488	57271840	-	BC055402	Unmarked	0	0	32.386	1.539	81	50	98	49	41	64	76	56	80	46	95	57	76	77	9	44
26843	NR_037999	chr1	57416065	57434388	-	4930558J18Rik	H3K4me3-only	235.879	29.247	3.479	0.122	49	26	86	42	33	52	57	53	67	64	117	89	54	52	78	80
26134	NM_028546	chr1	57434463	57442266	+	1700066M21Rik	H3K4me3-only	265.983	32.98	3.747	0.137	49	23	58	59	26	36	57	66	58	42	93	95	57	83	80	117
26713	NR_004860	chr1	57445087	57463518	-	Tyw5	H3K4me3-only	507.528	46.686	3.479	0.108	47	29	88	33	18	41	56	62	74	48	122	96	58	59	74	94
26921	NM_001037742	chr1	57445087	57463518	-	Tyw5	H3K4me3-only	507.528	46.686	3.479	0.108	47	29	88	33	18	41	56	62	74	48	122	96	58	59	74	94
26870	NM_001114102	chr1	57450164	57463518	-	Tyw5	H3K4me3-only	507.528	46.686	3.479	0.108	47	29	88	33	18	41	56	62	74	48	122	96	58	59	74	94
27000	NM_001081181	chr1	57463391	57472802	+	9430016H08Rik	H3K4me3-only	491.945	46.763	3.479	0.104	47	22	66	50	18	42	58	72	67	36	95	95	53	89	74	115
9696	NM_144882	chr1	57831704	58005241	+	Spats2l	H3K4me3-only	240.129	34.241	28.639	0.86	29	17	75	28	18	36	63	47	60	58	151	122	42	53	101	99
12294	NM_001164566	chr1	57902414	58005241	+	Spats2l	Unmarked	3.188	0.364	20.074	0.881	68	44	86	62	46	77	89	46	80	55	81	53	66	83	13	50
20236	NR_027630	chr1	58011944	58026368	-	Kctd18	H3K4me3-only	194.795	23.146	7.227	0.264	68	48	73	37	36	71	93	54	62	79	90	63	60	57	37	71
22302	NM_001159865	chr1	58011944	58026928	-	Kctd18	H3K4me3-only	177.086	31.561	5.888	0.218	62	40	54	40	33	68	71	60	51	64	114	76	50	60	65	91
22381	NM_001159864	chr1	58011944	58026928	-	Kctd18	H3K4me3-only	177.086	31.561	5.888	0.218	62	40	54	40	33	68	71	60	51	64	114	76	50	60	65	91
16138	NM_001177867	chr1	58042183	58082741	+	Sgol2	Unmarked	8.5	1.616	12.044	0.44	57	58	61	57	44	111	83	60	50	51	61	61	82	79	17	67
27304	NM_199007	chr1	58052817	58083121	+	Sgol2	H3K4me3-only	289.359	39.294	3.212	0.137	79	39	71	51	42	55	65	58	57	48	82	85	62	77	55	73
23430	NM_009676	chr1	58086812	58163254	+	Aox1	H3K4me3-only	72.959	11.559	5.085	0.216	74	52	82	48	46	66	63	65	65	35	76	66	71	88	21	81
20263	NM_023617	chr1	58169979	58257296	+	Aox3	Unmarked	21.604	1.925	7.227	0.248	97	64	88	38	52	75	81	59	70	59	75	56	67	70	16	32
2589	NM_023631	chr1	58267240	58325440	+	Aox4	H3K27me3-only	10.625	2.02	71.998	3.733	100	57	58	65	43	83	78	56	55	54	54	59	82	66	32	57
8186	NM_001008419	chr1	58335169	58436108	+	Aox3l1	Unmarked	3.188	0.568	34.527	2.009	59	37	98	44	28	81	66	65	74	42	88	66	77	80	18	76
25341	NM_025824	chr1	58449979	58463392	+	Bzw1	H3K4me3-only	119.356	56.728	4.282	0.191	15	10	65	34	14	27	43	45	52	39	170	142	44	53	124	122
27106	NR_027853	chr1	58468831	58480932	-	Clk1	H3K4me3-only	331.505	35.013	3.212	0.129	45	29	69	44	38	77	64	69	49	65	84	88	54	77	69	78
27165	NM_001042634	chr1	58468831	58480932	-	Clk1	H3K4me3-only	331.505	35.013	3.212	0.129	45	29	69	44	38	77	64	69	49	65	84	88	54	77	69	78
27427	NR_027854	chr1	58468831	58480932	-	Clk1	H3K4me3-only	331.505	35.013	3.212	0.129	45	29	69	44	38	77	64	69	49	65	84	88	54	77	69	78
26930	NM_027351	chr1	58487836	58502330	-	Ppil3	H3K4me3-only	327.255	44.44	3.479	0.126	36	35	72	37	25	83	88	74	57	68	76	80	62	84	46	76
26701	NM_027374	chr1	58490630	58502330	-	Ppil3	H3K4me3-only	327.255	44.44	3.479	0.126	36	35	72	37	25	83	88	74	57	68	76	80	62	84	46	76
21673	NM_022988	chr1	58504476	58519120	+	Nif3l1	H3K4me3-only	21.25	3.03	6.424	0.244	48	51	68	55	44	62	101	62	62	67	73	60	69	89	20	68
27699	NM_008765	chr1	58519614	58561953	-	Orc2	H3K4me3-only	358.776	42.63	2.944	0.102	36	42	53	39	34	87	63	74	52	47	79	89	48	82	72	102
27758	NM_001271526	chr1	58519614	58561953	-	Orc2	H3K4me3-only	358.776	42.63	2.944	0.102	36	42	53	39	34	87	63	74	52	47	79	89	48	82	72	102
21598	NM_001025378	chr1	58519614	58558270	-	Orc2	Unmarked	3.896	0.617	6.424	0.232	121	75	67	53	71	104	85	47	58	66	46	36	67	61	8	34
20223	NM_172513	chr1	58579649	58643177	-	Fam126b	H3K4me3-only	499.737	64.775	7.227	0.294	53	33	95	41	34	49	69	47	83	56	130	82	52	61	57	57
20363	NM_025597	chr1	58643442	58652792	+	Ndufb3	H3K4me3-only	503.987	71.865	7.227	0.286	78	45	67	53	48	66	57	66	58	50	59	69	60	75	53	95
10892	NR_045007	chr1	58709484	58712675	+	Gm20257	H3K4me3-only	43.209	20.537	24.356	1.984	53	42	75	46	44	95	73	46	63	45	92	80	56	76	40	73
19061	NM_175370	chr1	58714963	58752833	-	Als2cr12	Unmarked	2.125	1.01	8.297	0.845	115	43	75	55	44	93	78	55	66	56	74	42	64	77	11	51
14077	NM_207653	chr1	58770129	58815726	+	Cflar	H3K4me3-only	109.793	22.366	15.791	0.751	38	30	61	34	24	116	76	75	54	61	119	64	47	84	42	74
14136	NM_009805	chr1	58770129	58790071	+	Cflar	H3K4me3-only	109.793	22.366	15.791	0.751	38	30	61	34	24	116	76	75	54	61	119	64	47	84	42	74
12620	NM_009812	chr1	58852217	58904347	+	Casp8	H3K4me3-only	80.043	10.375	19.271	0.82	57	41	78	42	36	54	83	75	61	71	83	68	64	81	40	65
18272	NM_001277926	chr1	58859345	58904347	+	Casp8	Unmarked	7.083	0.878	9.1	0.36	89	47	78	65	36	65	66	68	69	43	72	48	85	81	16	71
18360	NM_001080126	chr1	58859345	58904347	+	Casp8	Unmarked	7.083	0.878	9.1	0.36	89	47	78	65	36	65	66	68	69	43	72	48	85	81	16	71
11720	NM_172406	chr1	58957293	59030326	-	Trak2	H3K4me3-only	399.86	36.782	21.68	0.773	35	19	75	39	18	38	63	62	63	44	116	105	52	80	75	115
11474	NM_172656	chr1	59030414	59051965	+	Stradb	H3K4me3-only	388.881	39.605	22.483	0.801	33	14	75	44	16	33	50	64	57	38	122	113	60	78	84	118
5698	NM_175200	chr1	59107349	59151744	-	Als2cr11	Unmarked	10.271	2.253	47.642	2.264	77	54	90	50	35	42	68	60	73	50	97	64	86	58	30	65
11577	NM_001033449	chr1	59157436	59176940	-	Tmem237	H3K4me3-only	275.9	32.783	22.215	0.728	31	23	74	39	17	34	60	55	70	50	155	97	49	59	84	102
11653	NM_001037812	chr1	59157440	59176650	-	Tmem237	H3K4me3-only	237.295	42.291	21.947	0.773	41	43	66	42	29	60	74	52	70	57	125	81	52	55	67	85
11089	NM_145143	chr1	59177778	59218480	-	Mpp4	Unmarked	2.479	0.307	23.821	1.045	87	46	94	36	54	84	91	49	57	75	70	65	65	73	12	41
14057	NM_001164682	chr1	59177778	59220233	-	Mpp4	Unmarked	3.188	0.827	15.791	0.776	67	45	80	60	42	72	88	54	65	54	66	66	79	84	17	60
21443	NM_001159948	chr1	59219599	59293937	-	Als2	H3K4me3-only	301.755	25.309	6.424	0.181	47	38	64	34	25	58	77	66	59	64	98	87	52	66	69	95
21666	NM_028717	chr1	59219599	59294075	-	Als2	H3K4me3-only	297.15	27.334	6.424	0.185	39	35	61	34	25	66	77	69	56	62	97	91	48	74	72	93
21437	NM_146109	chr1	59248466	59294075	-	Als2	H3K4me3-only	297.15	27.334	6.424	0.185	39	35	61	34	25	66	77	69	56	62	97	91	48	74	72	93
13580	NM_001033373	chr1	59313750	59409213	+	Cdk15	H3K4me3-only	18.771	3.569	16.862	0.801	77	40	103	47	41	65	79	53	83	51	81	66	65	82	18	48
3597	NM_008057	chr1	59538990	59543799	+	Fzd7	H3K4me3-only	153.356	18.222	62.63	1.822	55	18	73	39	19	65	49	63	60	38	114	101	50	75	77	103
11419	NM_001013771	chr1	59573107	59691353	+	Gm973	H3K4me3-only	49.23	5.014	22.75	0.721	72	40	100	49	34	69	59	62	70	44	61	71	84	71	26	87
27599	NM_009460	chr1	59696277	59727678	-	Sumo1	H3K4me3-only	485.924	49.488	2.944	0.095	39	21	71	40	25	43	52	66	59	50	123	92	48	72	79	119
21646	NM_018868	chr1	59741849	59768354	+	Nop58	H3K4me3-only	355.943	40.6	6.424	0.183	98	52	65	53	54	82	68	56	62	67	68	57	54	59	53	51
17280	NR_028554	chr1	59748801	59748854	+	Snord70	Unmarked	6.021	1.01	10.438	0.397	97	103	73	47	98	122	69	51	63	49	37	34	62	67	3	24
14284	NR_028521	chr1	59761651	59761714	+	Snord11	Unmarked	3.188	0.364	15.524	0.497	78	91	69	42	79	130	82	65	55	64	30	36	68	71	4	35
11436	NM_007561	chr1	59821122	59934925	+	Bmpr2	H3K4me3-only	273.067	32.446	22.75	0.801	41	40	62	31	24	64	59	71	71	39	84	89	39	75	77	133
18603	NM_001037725	chr1	59969849	60042192	+	Fam117b	H3K4me3-only	276.962	37.61	8.832	0.293	25	14	60	65	11	17	35	51	42	39	115	135	85	44	122	139
6880	NM_027407	chr1	60045911	60099931	-	Ica1l	H3K4me3-only	145.565	25.943	40.951	1.825	31	19	60	40	16	34	50	57	55	41	140	134	48	63	120	91
17091	NM_001199060	chr1	60133711	60155344	-	Wdr12	H3K4me3-only	377.547	67.287	10.706	0.391	74	35	91	48	31	36	36	58	84	35	106	83	60	54	75	93
19156	NM_001199061	chr1	60133711	60154978	-	Wdr12	H3K4me3-only	418.631	54.262	8.297	0.324	71	33	85	47	39	46	49	58	76	47	106	80	50	66	69	77
20480	NM_021312	chr1	60133711	60154751	-	Wdr12	H3K4me3-only	402.694	45.933	7.227	0.275	78	44	81	50	49	65	60	67	73	53	62	67	54	79	52	65
18623	NM_139150	chr1	60155124	60207878	+	Carf	H3K4me3-only	432.09	68.455	8.832	0.345	39	26	64	43	29	65	56	73	63	47	90	87	41	86	77	113
18668	NM_173444	chr1	60237442	60391549	+	Nbeal1	H3K4me3-only	240.483	32.657	8.832	0.327	37	18	68	33	13	42	57	55	62	47	158	113	44	60	97	95
23168	NM_030013	chr1	60400215	60444231	+	Cyp20a1	H3K4me3-only	259.608	30.847	5.353	0.172	34	33	61	51	28	55	71	65	54	55	98	90	62	77	67	98
13549	NM_001198570	chr1	60466462	60538007	+	Abi2	H3K4me3-only	228.441	28.325	16.862	0.624	28	22	80	23	18	22	58	54	74	49	143	125	33	58	111	101
13565	NM_198127	chr1	60466462	60538007	+	Abi2	H3K4me3-only	228.441	28.325	16.862	0.624	28	22	80	23	18	22	58	54	74	49	143	125	33	58	111	101
13585	NM_001198571	chr1	60466462	60538007	+	Abi2	H3K4me3-only	228.441	28.325	16.862	0.624	28	22	80	23	18	22	58	54	74	49	143	125	33	58	111	101
21346	NM_001045513	chr1	60540028	60623609	-	Raph1	H3K4me3-only	255.358	52.018	6.424	0.221	11	11	65	25	3	18	60	50	56	46	171	153	42	57	129	102
14503	NM_007642	chr1	60803231	60830203	+	Cd28	Unmarked	1.417	0.253	14.988	0.668	87	59	70	51	53	118	78	70	54	59	33	45	72	83	10	57
9770	NM_009843	chr1	60965868	60972674	+	Ctla4	Unmarked	2.125	0.466	28.371	1.419	70	45	81	54	49	110	74	70	64	64	65	40	67	85	13	48
11513	NM_017480	chr1	61034757	61057164	+	Icos	Unmarked	1.063	0.253	22.483	1.21	92	105	59	63	57	95	59	83	56	39	22	34	113	55	11	56
5216	NR_040483	chr1	61435275	61452748	+	9530026F06Rik	Unmarked	9.917	3.535	50.586	2.186	69	58	101	56	40	44	84	50	93	54	82	60	82	61	23	42
3382	NM_001081050	chr1	61685397	62688858	+	Pard3b	Bivalent	97.397	16.339	64.504	3.607	36	18	68	36	23	48	56	63	41	54	105	110	58	69	81	133
2209	NM_010939	chr1	62749890	62865266	+	Nrp2	H3K4me3-only	281.567	22.304	76.28	2.339	32	16	72	47	13	25	66	51	60	43	120	129	63	71	93	98
2211	NM_001077404	chr1	62749890	62865266	+	Nrp2	H3K4me3-only	281.567	22.304	76.28	2.339	32	16	72	47	13	25	66	51	60	43	120	129	63	71	93	98
2225	NM_001077407	chr1	62749890	62843665	+	Nrp2	H3K4me3-only	281.567	22.304	76.28	2.339	32	16	72	47	13	25	66	51	60	43	120	129	63	71	93	98
2229	NM_001077403	chr1	62749890	62865266	+	Nrp2	H3K4me3-only	281.567	22.304	76.28	2.339	32	16	72	47	13	25	66	51	60	43	120	129	63	71	93	98
2231	NM_001077406	chr1	62749890	62843665	+	Nrp2	H3K4me3-only	281.567	22.304	76.28	2.339	32	16	72	47	13	25	66	51	60	43	120	129	63	71	93	98
2243	NM_001077405	chr1	62749890	62865266	+	Nrp2	H3K4me3-only	281.567	22.304	76.28	2.339	32	16	72	47	13	25	66	51	60	43	120	129	63	71	93	98
10908	NR_040601	chr1	62837491	62841306	-	4930487H11Rik	Unmarked	15.938	2.273	24.356	0.868	80	50	81	67	39	73	75	43	77	38	78	62	82	69	21	64
29109	NM_001081436	chr1	63094374	63160841	-	Ino80d	H3K4me3-only	204.357	30.67	1.338	0.041	55	21	67	22	23	30	51	43	51	40	176	121	36	55	95	113
29200	NM_001114609	chr1	63094374	63160841	-	Ino80d	H3K4me3-only	204.357	30.67	1.338	0.041	55	21	67	22	23	30	51	43	51	40	176	121	36	55	95	113
29326	NR_045915	chr1	63161044	63204869	+	Gm11602	H3K4me3-only	192.315	28.863	1.071	0.033	50	25	68	42	26	64	40	54	53	23	104	106	56	73	73	142
29367	NR_045914	chr1	63161313	63204869	+	Gm11602	H3K4me3-only	238.004	27.148	0.803	0.026	58	45	72	42	49	121	56	61	55	43	81	66	55	78	36	81
21718	NM_001160039	chr1	63190165	63223396	-	Ndufs1	H3K4me3-only	510.362	53.904	6.156	0.189	64	19	79	37	24	58	50	75	72	53	109	76	40	77	72	94
21722	NM_145518	chr1	63190165	63223396	-	Ndufs1	H3K4me3-only	510.362	53.904	6.156	0.189	64	19	79	37	24	58	50	75	72	53	109	76	40	77	72	94
21800	NM_001160038	chr1	63190165	63223396	-	Ndufs1	H3K4me3-only	510.362	53.904	6.156	0.189	64	19	79	37	24	58	50	75	72	53	109	76	40	77	72	94
21990	NM_001160040	chr1	63190165	63223396	-	Ndufs1	H3K4me3-only	510.362	53.904	6.156	0.189	64	19	79	37	24	58	50	75	72	53	109	76	40	77	72	94
21693	NM_018796	chr1	63223404	63227060	+	Eef1b2	H3K4me3-only	512.841	54.166	6.156	0.189	58	19	77	54	24	63	39	70	75	37	96	77	51	78	73	108
18154	NR_028558	chr1	63225596	63225709	+	Snora41	H3K4me3-only	50.647	14.442	9.368	0.387	85	71	71	43	52	112	105	50	79	70	51	39	54	67	11	39
17878	NM_146250	chr1	63229267	63260783	-	Gpr1	H3K4me3-only	37.542	5.948	9.635	0.382	95	56	83	46	56	86	54	61	60	42	50	54	69	73	19	95
1612	NM_028673	chr1	63319842	63361149	+	Zdbf2	Bivalent	90.668	18.47	83.507	3.841	35	11	59	40	9	42	47	51	48	40	152	140	53	56	121	95
1616	NM_001267872	chr1	63319842	63361149	+	Zdbf2	Bivalent	90.668	18.47	83.507	3.841	35	11	59	40	9	42	47	51	48	40	152	140	53	56	121	95
4612	NM_001177600	chr1	63492477	63619793	+	Adam23	H3K4me3-only	133.877	20.093	54.601	2.049	28	25	58	28	12	37	64	57	43	35	88	140	56	73	96	159
4635	NM_011780	chr1	63492477	63643089	+	Adam23	H3K4me3-only	133.877	20.093	54.601	2.049	28	25	58	28	12	37	64	57	43	35	88	140	56	73	96	159
7310	NM_001081658	chr1	63669424	63733501	-	Dytn	Unmarked	1.417	0.337	38.809	2.574	78	72	60	53	60	109	85	64	60	51	58	42	64	86	8	49
19133	NM_029696	chr1	63745400	63776892	-	Mdh1b	H3K4me3-only	187.357	26.716	8.297	0.333	99	56	72	50	50	70	60	60	64	47	66	62	65	67	41	70
21123	NM_172422	chr1	63777198	63799959	+	Fastkd2	H3K4me3-only	323.005	38.38	6.691	0.261	80	54	68	49	50	93	66	67	68	53	66	58	53	76	45	53
7694	NM_001256158	chr1	63801482	63815841	-	4933402D24Rik	Unmarked	1.771	0.631	37.203	2.165	117	64	85	56	41	69	82	61	87	50	41	41	77	69	11	48
12935	NR_027824	chr1	64011300	64015573	+	Gm13749	Unmarked	0	0	18.468	1.225	75	59	58	45	43	85	108	90	58	77	40	33	61	105	2	60
11870	NM_033563	chr1	64082246	64167963	-	Klf7	H3K4me3-only	138.835	14.664	21.412	0.686	55	36	72	49	28	54	57	77	66	35	103	73	62	92	45	95
20015	NM_009952	chr1	64579377	64651122	+	Creb1	H3K4me3-only	325.838	40.401	7.494	0.271	39	14	74	39	13	21	45	56	56	40	133	130	57	60	108	114
20120	NM_001037726	chr1	64579377	64651122	+	Creb1	H3K4me3-only	325.838	40.401	7.494	0.271	39	14	74	39	13	21	45	56	56	40	133	130	57	60	108	114
20189	NM_133828	chr1	64579377	64651122	+	Creb1	H3K4me3-only	325.838	40.401	7.494	0.271	39	14	74	39	13	21	45	56	56	40	133	130	57	60	108	114
6161	NM_025964	chr1	64653053	64663742	-	Mettl21a	H3K4me3-only	334.338	38.136	44.965	1.509	46	20	67	54	31	44	59	61	44	65	101	93	66	67	75	106
19837	NR_038009	chr1	64726442	64737233	-	2810408I11Rik	H3K4me3-only	134.94	25.654	7.762	0.341	42	17	54	48	22	54	46	71	42	41	75	117	55	81	100	134
17171	NM_001097644	chr1	64737918	64772216	+	Ccnyl1	H3K4me3-only	142.023	45.001	10.438	0.392	21	22	56	39	26	39	52	56	49	45	130	122	42	68	107	125
20565	NM_001042659	chr1	64777131	64784324	-	Fzd5	H3K4me3-only	223.837	27.754	6.959	0.22	27	14	78	38	9	21	56	48	73	37	145	123	48	63	99	120
20824	NM_022721	chr1	64777131	64784324	-	Fzd5	H3K4me3-only	223.837	27.754	6.959	0.22	27	14	78	38	9	21	56	48	73	37	145	123	48	63	99	120
23679	NM_001039493	chr1	64835694	65003398	-	Plekhm3	H3K4me3-only	205.066	22.49	5.085	0.21	75	38	76	44	38	62	68	51	69	53	102	73	52	66	50	82
19955	NM_027582	chr1	65059659	65079322	-	Akr1cl	Unmarked	1.771	0.266	7.494	0.362	93	68	78	55	57	99	63	63	69	42	66	36	76	73	5	56
12052	NM_007777	chr1	65095130	65097737	-	Cryge	H3K4me3-only	17	3.463	20.877	0.992	51	46	71	59	41	57	69	74	53	44	45	72	82	93	30	112
8889	NM_007776	chr1	65108411	65110014	-	Crygd	Unmarked	12.75	3.306	31.85	1.298	66	54	67	64	42	70	75	57	59	40	49	70	84	80	27	95
5946	NM_007775	chr1	65118098	65120106	-	Crygc	Unmarked	9.563	1.604	46.036	1.823	76	52	79	64	39	55	68	61	68	42	52	63	88	74	25	93
5977	NM_001082573	chr1	65118098	65120106	-	Crygc	Unmarked	9.563	1.604	46.036	1.823	76	52	79	64	39	55	68	61	68	42	52	63	88	74	25	93
7758	NM_144761	chr1	65126800	65128841	-	Crygb	Unmarked	8.854	1.942	36.936	1.756	80	58	91	49	49	65	64	61	73	42	61	63	76	74	24	69
5869	NM_007774	chr1	65146962	65149937	-	Cryga	Unmarked	19.479	2.057	46.571	1.703	58	50	66	63	38	59	84	62	63	50	46	71	78	83	34	94
17671	NM_175293	chr1	65153886	65169767	-	D630023F18Rik	Unmarked	9.563	1.515	9.903	0.421	64	52	71	54	41	62	87	70	57	43	91	68	80	102	10	47
21302	NM_001111320	chr1	65205189	65233053	-	Idh1	H3K4me3-only	260.316	30.931	6.424	0.187	39	32	67	44	42	77	53	73	47	51	60	87	55	84	65	123
24139	NM_010497	chr1	65205189	65225716	-	Idh1	H3K4me3-only	230.566	28.588	4.818	0.14	57	35	84	36	37	59	71	55	67	55	109	85	52	72	52	73
22750	NM_011086	chr1	65233258	65325270	+	Pikfyve	H3K4me3-only	321.942	48.318	5.621	0.159	43	28	81	36	32	42	64	55	77	46	138	97	36	76	76	72
3401	NM_139270	chr1	65357830	65435818	+	Pth2r	H3K4me3-only	51.001	12.12	64.236	1.928	74	38	87	66	26	49	71	54	61	41	70	84	104	73	27	74
9735	NM_027010	chr1	65973095	65974878	+	Crygf	Unmarked	3.542	1.263	28.371	2.129	62	58	67	63	50	62	65	71	47	40	55	60	91	88	15	105
9041	NM_008632	chr1	66221902	66489157	+	Map2	H3K4me3-only	117.231	47.752	31.047	1.581	40	15	75	40	27	43	60	67	58	42	116	105	45	96	71	99
9095	NM_001039934	chr1	66221902	66489157	+	Map2	H3K4me3-only	117.231	47.752	31.047	1.581	40	15	75	40	27	43	60	67	58	42	116	105	45	96	71	99
2866	NM_175510	chr1	66515020	66745722	+	Unc80	H3K4me3-only	83.585	13.242	69.054	2.773	39	26	80	35	19	26	63	44	68	37	141	119	55	63	80	104
25147	NM_025683	chr1	66747466	66766379	+	Rpe	H3K4me3-only	298.921	30.443	4.282	0.142	65	32	73	54	34	32	63	51	71	44	114	87	54	72	66	87
11717	NM_177645	chr1	66765816	66864169	-	Kansl1l	H3K4me3-only	307.421	35.066	21.68	0.835	34	15	64	41	17	36	39	43	54	31	156	132	49	52	114	122
11738	NM_001122738	chr1	66765816	66864169	-	Kansl1l	H3K4me3-only	307.421	35.066	21.68	0.835	34	15	64	41	17	36	39	43	54	31	156	132	49	52	114	122
10361	NM_007381	chr1	66877412	66909883	-	Acadl	H3K4me3-only	186.294	24.147	26.23	1.133	80	33	52	56	30	40	51	52	47	44	83	95	64	55	84	133
6386	NM_021285	chr1	66970869	66991630	-	Myl1	Unmarked	6.729	1.371	43.627	2.539	115	48	70	52	45	86	68	56	62	48	63	52	64	73	24	73
7056	NM_001113387	chr1	66970869	66981940	-	Myl1	Unmarked	2.833	0.621	40.148	2.009	95	64	101	53	69	84	54	57	72	49	48	44	77	67	10	55
17368	NM_001190985	chr1	67047090	67085446	-	Lancl1	H3K4me3-only	237.295	42.291	10.171	0.468	61	30	57	50	29	75	73	67	53	65	82	67	55	74	56	105
17373	NM_021295	chr1	67047090	67085446	-	Lancl1	H3K4me3-only	237.295	42.291	10.171	0.468	61	30	57	50	29	75	73	67	53	65	82	67	55	74	56	105
17383	NM_001190984	chr1	67047090	67085408	-	Lancl1	H3K4me3-only	246.504	41.353	10.171	0.453	56	31	58	49	33	75	72	68	53	67	84	67	52	76	57	101
14640	NM_001080809	chr1	67169639	67277022	+	Cps1	Unmarked	1.771	0.361	14.721	0.857	86	77	69	54	57	115	90	50	67	57	54	43	75	64	8	33
2161	NM_010154	chr1	68086539	69154633	-	Erbb4	H3K4me3-only	112.627	17.843	76.816	2.738	48	22	67	39	14	82	62	67	71	42	98	88	43	79	72	105
11060	NM_011770	chr1	69577783	69732534	-	Ikzf2	Unmarked	14.167	2.525	23.821	1.306	48	30	58	37	31	179	62	94	63	49	89	30	32	108	21	68
12039	NM_001271533	chr1	69873543	69972824	+	Spag16	H3K4me3-only	87.835	9.633	20.877	0.992	85	31	83	58	33	47	68	52	56	56	96	78	83	66	39	68
12045	NM_029160	chr1	69873543	70771706	+	Spag16	H3K4me3-only	87.835	9.633	20.877	0.992	85	31	83	58	33	47	68	52	56	56	96	78	83	66	39	68
12972	NM_025728	chr1	69998188	70771706	+	Spag16	Unmarked	0.708	0.202	18.468	1.197	55	48	56	35	44	103	61	121	37	48	41	45	58	131	13	103
8501	NM_177164	chr1	70772288	70931971	+	Vwc2l	Unmarked	3.896	0.556	33.189	1.604	94	64	80	52	50	85	76	55	65	47	44	65	82	70	21	49
27571	NM_007525	chr1	71074108	71149546	-	Bard1	H3K4me3-only	236.941	27.026	2.944	0.105	50	25	69	44	32	62	59	65	56	43	84	96	49	88	68	109
14071	NM_175210	chr1	71289663	71461484	-	Abca12	Unmarked	4.604	1.094	15.791	0.726	68	45	82	56	49	83	72	54	65	60	107	48	69	69	20	52
17679	NM_026195	chr1	71603729	71625977	+	Atic	H3K4me3-only	176.023	16.192	9.903	0.291	47	32	71	40	24	47	68	72	54	52	89	89	66	80	56	112
26062	NM_001276412	chr1	71632046	71699808	-	Fn1	H3K4me3-only	309.9	25.992	3.747	0.104	63	20	67	53	20	50	52	72	49	48	111	81	71	76	59	107
26064	NM_001276411	chr1	71632046	71699808	-	Fn1	H3K4me3-only	309.9	25.992	3.747	0.104	63	20	67	53	20	50	52	72	49	48	111	81	71	76	59	107
26098	NM_001276408	chr1	71632046	71699808	-	Fn1	H3K4me3-only	309.9	25.992	3.747	0.104	63	20	67	53	20	50	52	72	49	48	111	81	71	76	59	107
26123	NM_010233	chr1	71632046	71699808	-	Fn1	H3K4me3-only	309.9	25.992	3.747	0.104	63	20	67	53	20	50	52	72	49	48	111	81	71	76	59	107
26198	NM_001276413	chr1	71632046	71699808	-	Fn1	H3K4me3-only	309.9	25.992	3.747	0.104	63	20	67	53	20	50	52	72	49	48	111	81	71	76	59	107
26231	NM_001276409	chr1	71632046	71699808	-	Fn1	H3K4me3-only	309.9	25.992	3.747	0.104	63	20	67	53	20	50	52	72	49	48	111	81	71	76	59	107
26471	NM_001276410	chr1	71632046	71699808	-	Fn1	H3K4me3-only	309.9	25.992	3.747	0.104	63	20	67	53	20	50	52	72	49	48	111	81	71	76	59	107
26982	NR_040308	chr1	71699908	71709417	+	Apol7d	H3K4me3-only	296.796	31.347	3.479	0.098	43	21	76	39	23	65	73	54	68	57	120	78	45	72	54	111
9530	NR_027658	chr1	71934685	71937778	+	Gm8883	Unmarked	2.833	0.898	29.174	2.189	69	42	67	64	39	68	90	63	52	58	61	62	82	93	15	74
9555	NR_027659	chr1	71934685	71937778	+	Gm8883	Unmarked	2.833	0.898	29.174	2.189	69	42	67	64	39	68	90	63	52	58	61	62	82	93	15	74
4461	NR_040454	chr1	72005571	72051769	-	4933417E11Rik	Unmarked	3.542	0.561	55.939	2.346	92	58	83	53	50	81	69	71	64	58	57	41	79	74	11	58
27483	NM_001005423	chr1	72205806	72258881	-	Mreg	H3K4me3-only	203.295	20.704	2.944	0.086	88	31	51	45	23	51	65	47	46	50	107	104	57	54	85	95
5463	NM_023523	chr1	72305746	72330888	-	Pecr	H3K4me3-only	110.502	8.753	49.248	1.873	72	35	86	53	35	57	62	56	78	40	103	73	60	78	43	68
5351	NM_175564	chr1	72330946	72349569	+	Tmem169	H3K4me3-only	105.189	8.57	49.783	1.918	56	32	87	39	30	58	58	76	62	51	85	74	65	81	43	102
25174	NM_009533	chr1	72353994	72441527	+	Xrcc5	H3K4me3-only	227.378	18.012	4.282	0.134	67	57	64	45	50	104	74	59	62	47	73	63	54	78	35	67
1040	NM_001045533	chr1	72473685	72583138	-	43894	Bivalent	58.793	8.383	92.607	3.942	32	27	98	56	23	46	45	50	79	26	107	95	79	65	57	114
28704	NM_018817	chr1	72629824	72683364	+	Smarcal1	H3K4me3-only	214.274	19.094	2.141	0.059	79	49	75	57	52	58	70	59	61	57	88	58	68	75	30	63
12175	NM_176980	chr1	72689553	72747138	-	Ankar	Unmarked	2.479	0.544	20.609	1.224	69	58	83	33	48	88	74	75	53	63	65	60	74	75	19	62
21933	NM_009084	chr1	72757833	72760387	+	Rpl37a	H3K4me3-only	207.545	36.989	6.156	0.197	61	40	57	41	32	56	71	84	53	60	69	90	54	86	75	70
21316	NM_008342	chr1	72871053	72899045	+	Igfbp2	H3K4me3-only	180.628	24.529	6.424	0.226	51	14	73	48	20	33	67	44	55	49	130	117	60	68	81	89
576	NM_010518	chr1	72904638	72921439	-	Igfbp5	Bivalent	52.417	5.979	101.707	3.581	55	23	65	44	28	104	65	76	46	54	73	68	57	92	39	110
8257	NM_009407	chr1	73061648	73062473	-	Tnp1	Unmarked	4.958	0.884	34.259	1.745	91	39	86	60	43	80	67	54	66	50	60	60	76	75	23	69
8340	NR_038001	chr1	73062609	73072082	+	1700027A15Rik	Unmarked	4.604	0.772	33.992	1.671	91	43	69	49	47	95	80	65	50	62	61	56	64	87	19	61
10418	NR_038002	chr1	73071159	73072082	+	1700027A15Rik	Unmarked	1.063	0.168	25.962	1.194	91	71	78	61	57	87	76	59	80	49	58	35	73	72	9	43
16063	NR_003202	chr1	73437958	73454143	-	Pinc	Unmarked	0.708	0.101	12.044	0.592	78	66	71	53	49	102	74	71	64	44	51	43	76	84	7	66
9971	NR_040605	chr1	73445541	73477353	+	D530049I02Rik	Unmarked	1.063	0.178	27.568	1.332	87	66	71	48	52	84	73	74	58	40	46	58	75	94	11	62
12385	NR_045311	chr1	73664954	73911040	-	6030407O03Rik	Unmarked	0.354	0.078	20.074	0.622	80	75	87	44	65	113	70	57	71	55	61	40	71	62	9	39
3553	NM_027884	chr1	73956804	74171021	-	Tns1	H3K4me3-only	126.085	14.982	62.898	2.329	43	15	67	35	17	20	58	77	46	59	108	101	53	78	82	140
6047	NM_001170641	chr1	74172114	74194804	+	Rufy4	Unmarked	25.5	2.693	45.501	1.753	49	21	91	57	24	77	71	60	71	47	78	63	73	87	20	110
6049	NM_001034060	chr1	74172114	74194797	+	Rufy4	Unmarked	25.5	2.693	45.501	1.753	49	21	91	57	24	77	71	60	71	47	78	63	73	87	20	110
6234	NM_009909	chr1	74200567	74207820	+	Cxcr2	Unmarked	0.708	0.106	44.698	1.874	60	43	111	45	39	61	68	65	76	52	83	62	84	77	11	62
6086	NM_178241	chr1	74238359	74241205	-	Cxcr1	Unmarked	4.958	0.832	45.233	2.115	60	43	71	47	48	81	82	75	53	65	78	47	60	97	13	79
19602	NM_029711	chr1	74283123	74314787	+	Arpc2	H3K4me3-only	370.818	40.669	7.762	0.257	50	29	66	38	20	23	54	56	57	45	139	112	56	57	94	103
8444	NM_174985	chr1	74325173	74326163	+	Gpbar1	Unmarked	2.833	0.673	33.456	1.8	51	35	59	46	28	72	96	60	39	41	73	90	73	109	15	112
22081	NM_146110	chr1	74326413	74331312	-	Aamp	H3K4me3-only	294.317	33.571	5.888	0.179	23	25	57	46	26	51	52	82	57	42	88	82	46	93	71	158
22119	NM_001190444	chr1	74326413	74331312	-	Aamp	H3K4me3-only	294.317	33.571	5.888	0.179	23	25	57	46	26	51	52	82	57	42	88	82	46	93	71	158
22995	NM_001039509	chr1	74331607	74400266	+	Pnkd	H3K4me3-only	323.359	34.153	5.353	0.162	51	27	88	45	31	42	47	66	74	45	113	87	55	72	72	84
23100	NM_025580	chr1	74331607	74334027	+	Pnkd	H3K4me3-only	323.359	34.153	5.353	0.162	51	27	88	45	31	42	47	66	74	45	113	87	55	72	72	84
28498	NM_027154	chr1	74334820	74350910	-	Tmbim1	H3K4me3-only	240.129	26.336	2.141	0.074	71	37	65	53	28	55	72	51	63	51	105	81	64	63	59	81
10284	NM_019999	chr1	74379183	74400266	+	Pnkd	H3K4me3-only	55.251	9.847	26.497	1.035	55	28	92	36	35	42	77	58	67	67	103	84	54	75	49	77
13979	NM_001033345	chr1	74408681	74415895	+	Gm216	Unmarked	8.5	0.866	16.059	0.58	58	58	81	41	59	96	77	65	54	59	66	53	67	84	8	73
6674	NM_013612	chr1	74421776	74432625	+	Slc11a1	Unmarked	6.375	1.136	42.021	1.964	51	46	82	53	24	46	111	55	82	80	105	46	75	63	15	65
14965	NM_153088	chr1	74438182	74443859	+	Ctdsp1	H3K4me3-only	339.297	38.702	13.918	0.323	55	31	65	39	26	36	33	59	54	34	110	106	54	53	96	148
3177	NR_029743	chr1	74440883	74440968	+	Mir26b	H3K4me3-only	25.5	3.827	66.11	1.45	28	36	71	50	29	54	84	75	60	56	94	59	67	97	20	119
10460	NM_009509	chr1	74455957	74482134	+	Vil1	Unmarked	4.25	2.02	25.694	1.437	36	30	71	48	29	50	88	74	49	65	108	59	72	96	13	111
5089	NM_176972	chr1	74482083	74590860	-	Usp37	Unmarked	2.479	0.337	51.389	2.364	64	57	81	46	48	88	55	92	58	51	78	38	77	88	11	67
27173	NM_021383	chr1	74552633	74577416	+	Rqcd1	H3K4me3-only	286.879	40.907	3.212	0.1	49	25	73	48	23	40	55	62	63	48	110	100	60	68	82	93
6431	NM_001081456	chr1	74589462	74612551	+	Plcd4	Unmarked	9.208	1.25	43.359	1.845	64	41	90	57	40	59	65	73	69	40	62	61	79	98	14	87
5098	NM_148937	chr1	74590933	74612551	+	Plcd4	Unmarked	2.125	0.289	51.389	2.364	87	54	87	49	46	67	83	57	93	51	70	38	52	80	12	73
21383	NM_029888	chr1	74611701	74634602	-	Zfp142	H3K4me3-only	342.838	65.178	6.424	0.278	40	24	86	52	20	27	56	70	75	42	95	93	67	79	69	104
18927	NM_025784	chr1	74634934	74639017	+	Bcs1l	H3K4me3-only	228.441	36.192	8.565	0.382	71	34	89	31	33	45	69	70	66	63	104	73	54	75	44	78
18016	NM_021313	chr1	74640325	74647971	-	Rnf25	H3K4me3-only	275.9	35.762	9.368	0.326	32	30	66	56	36	68	56	78	57	40	81	72	60	100	47	120
17952	NM_175031	chr1	74648028	74683467	+	Stk36	H3K4me3-only	258.191	33.466	9.635	0.339	63	29	96	42	34	36	61	59	76	56	122	70	57	69	45	84
22147	NM_001014974	chr1	74708327	74744547	+	Ttll4	H3K4me3-only	199.399	40.619	5.888	0.23	36	22	63	31	27	76	58	87	46	64	82	82	43	86	71	125
8316	NM_024264	chr1	74760147	74784464	+	Cyp27a1	H3K4me3-only	137.419	14.514	33.992	1.259	60	33	87	43	29	44	72	65	72	44	97	84	62	88	42	77
2754	NM_153744	chr1	74785495	74795529	-	Prkag3	Bivalent	47.105	12.213	70.392	4.182	39	35	77	53	31	47	86	67	62	69	86	69	72	80	37	89
586	NM_009526	chr1	74818465	74831893	+	Wnt6	Bivalent	136.002	38.78	101.44	4.592	14	17	50	43	13	31	51	81	40	35	71	109	57	93	83	211
848	NM_009518	chr1	74838592	74850749	+	Wnt10a	Bivalent	29.75	6.06	96.354	4.907	27	18	70	46	19	20	70	56	51	46	119	102	63	81	60	151
2408	NM_009872	chr1	74901602	74904306	+	Cdk5r2	H3K4me3-only	135.294	15.432	74.139	2.936	55	19	76	39	16	29	46	50	54	34	122	123	63	59	89	125
520	NM_153111	chr1	74928082	74931982	-	Fev	Bivalent	73.314	10.454	103.045	3.816	44	24	89	42	18	36	65	39	76	43	153	94	60	55	60	101
1802	NM_021541	chr1	74936517	74939709	-	Cryba2	H3K4me3-only	74.022	6.809	80.83	2.561	46	22	91	51	29	44	64	65	66	48	81	93	68	88	52	91
1200	NR_029876	chr1	74947231	74947295	-	Mir375	Bivalent	89.251	16.968	89.395	4.046	32	22	65	41	16	28	83	62	49	64	112	101	63	75	66	120
5847	NM_001039495	chr1	74948653	74982173	-	Ccdc108	H3K4me3-only	22.313	4.545	46.839	2.783	147	53	72	78	50	83	53	47	72	44	50	33	81	53	24	59
17	NM_010544	chr1	74991891	74998225	-	Ihh	Bivalent	99.522	20.273	131.952	5.3	18	16	67	31	10	27	57	52	46	42	128	136	57	61	101	150
20245	NM_029342	chr1	75013919	75121800	-	Nhej1	H3K4me3-only	111.918	11.398	7.227	0.248	67	33	77	38	37	77	80	43	62	66	99	78	48	61	50	83
5846	NM_194333	chr1	75122115	75130464	-	Slc23a3	Unmarked	3.896	0.855	46.839	2.671	37	50	64	51	40	70	78	86	52	50	77	58	74	104	17	91
4589	NM_026977	chr1	75131788	75138942	-	Cnppd1	H3K4me3-only	54.542	6.481	54.868	1.647	57	37	56	51	30	72	69	65	51	60	78	84	63	67	71	88
4585	NM_170755	chr1	75139359	75144483	+	Fam134a	H3K4me3-only	128.564	12.221	54.868	1.719	30	17	67	47	12	41	69	48	62	46	140	120	57	67	92	84
17789	NM_001159905	chr1	75165219	75168200	+	Zfand2b	H3K4me3-only	188.419	19.901	9.635	0.302	58	20	88	54	25	41	74	49	84	54	132	80	54	73	56	57
17894	NM_001159906	chr1	75165219	75168200	+	Zfand2b	H3K4me3-only	188.419	19.901	9.635	0.302	58	20	88	54	25	41	74	49	84	54	132	80	54	73	56	57
18374	NM_026846	chr1	75165308	75168200	+	Zfand2b	H3K4me3-only	202.232	21.36	9.1	0.292	56	22	85	52	25	44	71	52	81	51	129	83	53	74	59	62
15102	NM_023732	chr1	75168214	75176857	-	Abcb6	H3K4me3-only	140.96	18.271	13.65	0.608	33	23	75	46	32	46	90	54	56	69	111	92	56	85	51	80
16109	NM_001003917	chr1	75177439	75188497	-	Atg9a	H3K4me3-only	302.463	37.503	12.044	0.424	36	30	76	64	25	36	57	55	66	39	106	85	78	68	58	120
15844	NR_051998	chr1	75188733	75195960	+	Ankzf1	H3K4me3-only	341.422	33.571	12.312	0.423	36	26	64	34	21	48	75	73	50	59	116	96	53	84	67	97
15948	NM_001267620	chr1	75188733	75192113	+	Ankzf1	H3K4me3-only	341.422	33.571	12.312	0.423	36	26	64	34	21	48	75	73	50	59	116	96	53	84	67	97
15949	NM_026187	chr1	75188733	75195960	+	Ankzf1	H3K4me3-only	341.422	33.571	12.312	0.423	36	26	64	34	21	48	75	73	50	59	116	96	53	84	67	97
15963	NR_051999	chr1	75188733	75192113	+	Ankzf1	H3K4me3-only	341.422	33.571	12.312	0.423	36	26	64	34	21	48	75	73	50	59	116	96	53	84	67	97
18432	NM_029010	chr1	75194809	75207353	-	Glb1l	H3K4me3-only	241.545	29.95	9.1	0.316	52	21	87	53	40	34	52	72	56	59	101	76	65	85	51	95
19076	NR_102731	chr1	75207403	75212181	+	Stk16	H3K4me3-only	251.462	34.147	8.297	0.292	33	22	86	57	35	51	66	57	78	50	95	74	51	87	50	107
19138	NM_001277992	chr1	75207403	75212181	+	Stk16	H3K4me3-only	251.462	34.147	8.297	0.292	33	22	86	57	35	51	66	57	78	50	95	74	51	87	50	107
19173	NM_011494	chr1	75207403	75212181	+	Stk16	H3K4me3-only	251.462	34.147	8.297	0.292	33	22	86	57	35	51	66	57	78	50	95	74	51	87	50	107
11061	NM_009447	chr1	75211548	75215828	-	Tuba4a	H3K4me3-only	262.441	32.541	23.821	0.882	38	27	70	62	31	40	61	64	72	50	90	73	56	78	64	123
23879	NM_001243091	chr1	75216669	75220229	-	A630095N17Rik	H3K4me3-only	19.479	3.268	5.085	0.179	96	61	97	43	64	56	66	57	68	54	67	54	69	72	13	62
18571	NM_001243090	chr1	75216669	75228668	-	A630095N17Rik	Unmarked	6.375	0.826	8.832	0.37	87	40	105	67	44	42	69	41	79	53	85	52	88	62	10	75
11896	NM_001159883	chr1	75232997	75242267	+	Dnajb2	H3K4me3-only	167.878	17.731	21.144	0.726	39	30	81	48	39	36	66	51	71	49	108	89	49	78	61	104
11898	NM_178055	chr1	75232997	75242267	+	Dnajb2	H3K4me3-only	167.878	17.731	21.144	0.726	39	30	81	48	39	36	66	51	71	49	108	89	49	78	61	104
11911	NM_001159884	chr1	75232997	75242267	+	Dnajb2	H3K4me3-only	167.878	17.731	21.144	0.726	39	30	81	48	39	36	66	51	71	49	108	89	49	78	61	104
11923	NM_020266	chr1	75232997	75242267	+	Dnajb2	H3K4me3-only	167.878	17.731	21.144	0.726	39	30	81	48	39	36	66	51	71	49	108	89	49	78	61	104
12141	NM_001159885	chr1	75233276	75242267	+	Dnajb2	H3K4me3-only	181.69	21.589	20.609	0.7	34	20	81	45	32	29	67	53	64	51	100	97	49	81	64	132
2528	NM_008985	chr1	75243615	75260783	-	Ptprn	Bivalent	26.209	4.983	72.533	3.978	47	32	99	37	37	39	67	46	88	53	157	74	44	64	49	66
3536	NM_009049	chr1	75268776	75274955	-	Resp18	Unmarked	10.271	1.627	63.166	2.815	82	47	100	42	38	62	66	53	82	54	114	59	70	55	29	46
27047	NM_016878	chr1	75305139	75313592	-	Dnpep	H3K4me3-only	276.962	27.233	3.212	0.109	37	20	89	38	28	41	62	59	81	50	141	89	38	79	68	79
28329	NM_001110831	chr1	75305139	75314212	-	Dnpep	H3K4me3-only	110.856	17.563	2.409	0.078	39	14	93	46	25	18	60	36	89	51	170	110	39	57	96	56
999	NM_010043	chr1	75356918	75364290	+	Des	Bivalent	36.126	3.962	93.678	3.71	48	22	64	42	21	37	56	78	45	41	104	104	62	92	70	113
2016	NR_037976	chr1	75364784	75371590	-	Gm15179	H3K27me3-only	10.271	1.274	78.689	3.869	41	33	84	40	28	50	67	54	68	42	129	80	62	73	39	109
1793	NM_007463	chr1	75371871	75428881	+	Speg	H3K27me3-only	15.229	1.81	81.098	3.92	35	22	83	36	24	22	61	56	57	41	139	104	60	78	57	124
2741	NM_001085371	chr1	75378688	75401140	+	Speg	H3K4me3-only	116.523	19.548	70.392	2.307	36	20	70	24	12	29	66	51	50	37	137	122	52	72	72	149
811	NM_001085370	chr1	75382184	75428879	+	Speg	H3K27me3-only	2.125	0.404	97.157	4.947	21	39	73	42	28	44	92	68	65	63	132	63	60	86	27	96
5902	NM_001173477	chr1	75396659	75401140	+	Speg	Unmarked	1.771	0.505	46.304	2.277	34	25	84	27	28	53	89	64	43	58	125	88	65	98	16	102
11802	NM_133708	chr1	75432517	75439751	+	Gmppa	H3K4me3-only	119.71	12.644	21.412	0.754	57	42	85	47	45	73	66	75	55	68	80	57	74	75	29	71
583	NM_183022	chr1	75447084	75470915	+	Asic4	Bivalent	25.146	3.415	101.44	5.357	37	25	96	37	11	32	83	51	74	42	120	103	72	78	40	98
6680	NM_001001565	chr1	75471143	75476046	-	Chpf	H3K4me3-only	199.753	25.892	42.021	1.479	19	12	56	43	8	19	65	64	61	36	159	114	42	89	90	122
6683	NM_001001566	chr1	75471143	75476046	-	Chpf	H3K4me3-only	199.753	25.892	42.021	1.479	19	12	56	43	8	19	65	64	61	36	159	114	42	89	90	122
6585	NM_177056	chr1	75476106	75482268	+	Tmem198	H3K4me3-only	184.524	23.918	42.556	1.536	19	14	90	35	12	22	40	64	62	44	111	112	65	59	87	163
2115	NM_178884	chr1	75482399	75503027	-	Obsl1	H3K4me3-only	121.127	21.587	77.351	2.658	38	21	92	56	22	25	54	49	60	43	116	108	86	61	66	102
2505	NM_010564	chr1	75503651	75506929	+	Inha	Unmarked	15.938	2.164	72.801	2.662	43	41	84	43	30	39	109	50	75	76	123	61	63	72	19	71
28477	NM_027886	chr1	75518103	75533910	+	Stk11ip	H3K4me3-only	295.379	35.097	2.409	0.106	49	35	72	41	36	83	72	67	66	51	84	74	46	90	47	86
1976	NM_009208	chr1	75542840	75556006	+	Slc4a3	Bivalent	104.481	14.898	78.957	3.816	32	28	82	27	18	41	76	43	71	52	172	98	48	57	62	92
13593	NR_038012	chr1	76485707	76498603	+	Gm17751	Unmarked	0.708	0.288	16.862	1.023	99	74	79	52	67	73	59	71	52	43	48	46	86	80	3	67
13624	NR_038013	chr1	76485707	76498603	+	Gm17751	Unmarked	0.708	0.288	16.862	1.023	99	74	79	52	67	73	59	71	52	43	48	46	86	80	3	67
19949	NM_007936	chr1	77363759	77511663	-	Epha4	H3K4me3-only	289.004	41.21	7.494	0.232	48	31	71	51	20	53	64	66	73	46	131	76	61	73	59	76
480	NM_001159520	chr1	78097841	78193711	-	Pax3	Bivalent	84.293	18.489	104.116	5.119	55	39	76	42	25	47	54	78	74	37	89	76	57	82	57	111
484	NM_008781	chr1	78097841	78193711	-	Pax3	Bivalent	84.293	18.489	104.116	5.119	55	39	76	42	25	47	54	78	74	37	89	76	57	82	57	111
2190	NM_001004173	chr1	78306920	78416861	+	Sgpp2	Bivalent	154.419	20.969	76.548	3.358	42	26	70	55	19	52	65	56	66	50	136	91	66	64	72	69
27900	NM_001278075	chr1	78414532	78485472	-	Farsb	H3K4me3-only	388.172	35.707	2.677	0.073	62	37	72	51	35	62	65	72	59	59	75	77	66	77	58	72
27865	NR_102758	chr1	78421319	78485472	-	Farsb	H3K4me3-only	388.172	35.707	2.677	0.073	62	37	72	51	35	62	65	72	59	59	75	77	66	77	58	72
27930	NR_102757	chr1	78421319	78485472	-	Farsb	H3K4me3-only	388.172	35.707	2.677	0.073	62	37	72	51	35	62	65	72	59	59	75	77	66	77	58	72
27957	NM_011811	chr1	78421319	78485472	-	Farsb	H3K4me3-only	388.172	35.707	2.677	0.073	62	37	72	51	35	62	65	72	59	59	75	77	66	77	58	72
6175	NM_026713	chr1	78507634	78534748	+	Mogat1	Unmarked	4.604	0.938	44.965	2.29	119	54	83	57	52	79	66	56	64	55	59	44	78	65	13	55
24602	NM_001001981	chr1	78654399	78664176	+	Utp14b	H3K4me3-only	255.712	25.144	4.55	0.158	40	27	69	24	15	47	58	58	49	49	119	127	55	55	99	108
24614	NM_001033606	chr1	78654399	78704318	+	Acsl3	H3K4me3-only	255.712	25.144	4.55	0.158	40	27	69	24	15	47	58	58	49	49	119	127	55	55	99	108
24660	NM_028817	chr1	78654399	78704318	+	Acsl3	H3K4me3-only	255.712	25.144	4.55	0.158	40	27	69	24	15	47	58	58	49	49	119	127	55	55	99	108
24959	NM_001136222	chr1	78654399	78704318	+	Acsl3	H3K4me3-only	255.712	25.144	4.55	0.158	40	27	69	24	15	47	58	58	49	49	119	127	55	55	99	108
27563	NM_001136226	chr1	78655014	78664176	+	Utp14b	H3K4me3-only	436.34	42.905	2.944	0.098	30	30	80	40	25	39	71	51	73	64	141	98	52	53	83	69
6373	NM_021342	chr1	78813523	78816600	+	Kcne4	Unmarked	1.063	0.379	43.895	1.987	73	64	63	45	56	122	64	89	51	46	35	44	65	99	14	69
10212	NM_009129	chr1	79431243	79436665	-	Scg2	Unmarked	2.833	0.425	26.765	1.413	112	71	78	40	61	99	72	58	73	50	42	54	56	70	26	37
3339	NM_183027	chr1	79603450	79668547	-	Ap1s3	Bivalent	71.897	14.646	64.771	3.185	54	25	97	40	21	37	71	52	79	56	140	88	63	62	55	59
13276	NM_001111279	chr1	79698836	79758344	-	Wdfy1	H3K4me3-only	227.733	30.925	17.665	0.709	33	34	63	46	30	81	70	61	54	65	103	81	58	62	67	91
13246	NM_027057	chr1	79722977	79758344	-	Wdfy1	H3K4me3-only	227.733	30.925	17.665	0.709	33	34	63	46	30	81	70	61	54	65	103	81	58	62	67	91
28781	NM_001081210	chr1	79772592	79778020	+	Mrpl44	H3K4me3-only	289.004	43.374	1.874	0.089	83	35	62	49	43	93	76	51	53	54	87	76	51	80	45	61
2547	NM_009255	chr1	79790895	79855240	-	Serpine2	Bivalent	144.856	27.539	72.266	3.324	22	13	49	60	12	27	53	60	50	46	139	109	61	65	103	130
9031	NM_173425	chr1	80195273	80210519	-	Fam124b	H3K4me3-only	25.5	4.545	31.047	1.213	66	57	77	48	50	90	81	63	60	57	63	59	72	79	18	59
26252	NM_016716	chr1	80263392	80337005	-	Cul3	H3K4me3-only	160.44	32.683	3.747	0.139	15	14	51	26	4	19	28	64	52	28	103	144	35	54	145	217
12668	NR_040460	chr1	80442506	80472235	+	1700016L21Rik	Unmarked	2.125	0.433	19.271	0.999	81	70	78	47	53	101	87	59	79	48	55	46	63	82	8	42
4060	NM_175291	chr1	80497647	80755128	-	Dock10	H3K4me3-only	155.836	34.182	58.615	2.985	48	21	92	47	23	28	48	46	72	44	117	105	65	51	82	110
9689	NM_172849	chr1	81073891	81268226	+	Nyap2	Unmarked	1.771	0.266	28.639	1.384	66	53	112	38	35	88	69	61	110	35	75	55	57	77	19	49
3509	NM_010570	chr1	82229679	82288014	-	Irs1	H3K4me3-only	269.171	34.889	63.433	2.261	23	8	93	29	7	27	52	55	76	33	140	120	47	73	84	132
15347	NM_029777	chr1	82313153	82441941	+	Rhbdd1	H3K4me3-only	244.733	19.386	13.115	0.378	45	28	77	45	35	55	69	50	64	58	110	99	52	67	75	70
12189	NM_001122685	chr1	82335623	82441941	+	Rhbdd1	Unmarked	1.417	0.311	20.609	0.98	64	59	62	63	58	100	78	66	58	53	48	37	68	89	9	87
4314	NM_007735	chr1	82447297	82583424	-	Col4a4	H3K4me3-only	40.021	7.133	56.742	2.942	38	22	87	38	17	51	81	58	63	60	123	87	67	74	42	91
4361	NM_007734	chr1	82583495	82718634	+	Col4a3	H3K4me3-only	41.438	7.385	56.474	2.876	52	18	72	62	18	32	70	63	55	40	91	88	78	93	42	125
19314	NM_029409	chr1	82721492	82748964	+	Mff	H3K4me3-only	324.776	40.27	8.03	0.266	72	39	57	49	39	85	49	79	52	48	71	69	55	79	63	93
7975	NM_025453	chr1	82753223	82765031	-	Tm4sf20	Unmarked	0.708	0.119	35.598	1.781	83	92	65	58	87	121	63	58	59	46	44	31	69	70	8	45
20302	NM_010472	chr1	82836057	82892850	+	Agfg1	H3K4me3-only	240.837	49.06	7.227	0.375	35	23	71	36	26	40	68	45	60	53	121	117	44	63	91	106
22056	NM_030556	chr1	83009097	83035023	-	Slc19a3	H3K4me3-only	71.189	9.227	5.888	0.243	81	37	77	54	52	77	63	59	56	47	62	70	60	90	33	81
9295	NM_001159738	chr1	83113340	83115742	+	Ccl20	Unmarked	1.771	0.421	29.977	2.035	46	49	120	63	39	62	66	58	107	45	74	45	86	68	11	60
9335	NM_016960	chr1	83113340	83115742	+	Ccl20	Unmarked	1.771	0.421	29.977	2.035	46	49	120	63	39	62	66	58	107	45	74	45	86	68	11	60
10155	NM_027725	chr1	83156336	83207147	+	Daw1	H3K4me3-only	47.459	5.013	26.765	1.294	95	54	68	60	59	90	65	60	59	46	68	51	64	84	23	53
10179	NR_027636	chr1	83156336	83207147	+	Daw1	H3K4me3-only	47.459	5.013	26.765	1.294	95	54	68	60	59	90	65	60	59	46	68	51	64	84	23	53
5133	NM_172430	chr1	83252355	83404775	-	Sphkap	H3K4me3-only	38.251	5.454	51.121	2.025	58	31	102	42	23	48	77	60	76	51	112	79	75	78	28	59
19916	NM_001003948	chr1	84032867	84281220	-	Pid1	H3K4me3-only	256.421	27.083	7.494	0.248	31	32	75	48	20	46	55	69	54	35	95	94	81	76	54	134
6821	NM_152915	chr1	84366413	84692796	-	Dner	H3K4me3-only	136.002	19.393	41.218	1.416	37	26	79	41	21	42	59	83	56	47	84	95	68	90	60	111
5837	NR_039588	chr1	84692413	84692490	+	Mir5126	H3K4me3-only	209.67	35.174	46.839	1.67	31	17	94	45	21	19	58	47	69	44	137	121	67	65	81	83
26248	NM_133975	chr1	84717763	84835879	-	Trip12	H3K4me3-only	451.215	55.947	3.747	0.105	41	15	78	32	18	52	58	43	80	44	193	99	27	60	88	71
27177	NM_025386	chr1	84836415	84897061	+	Fbxo36	H3K4me3-only	385.339	34.338	3.212	0.09	64	17	68	40	18	38	45	83	52	44	66	94	55	84	78	153
4437	NM_027921	chr1	84903279	84931658	-	Slc16a14	H3K4me3-only	188.774	23.407	55.939	2.019	60	42	86	49	33	47	63	47	82	44	96	81	62	57	58	92
16575	NM_213615	chr1	85084713	85106428	-	A530032D15Rik	Unmarked	1.417	1.347	11.241	2.466	37	27	76	43	35	106	81	79	52	56	73	66	59	112	17	80
29463	NM_001081746	chr1	85196185	85210337	+	Gm7609	Unmarked	0	0	0.535	0.254	45	38	105	61	24	77	76	67	96	46	68	45	84	83	6	78
14002	NM_175219	chr1	85242918	85267141	-	C130026I21Rik	Unmarked	3.188	0.433	16.059	1.477	37	26	76	44	34	107	82	82	51	58	72	61	61	114	12	82
14023	NM_001037909	chr1	85242918	85267141	-	C130026I21Rik	Unmarked	3.188	0.433	16.059	1.477	37	26	76	44	34	107	82	82	51	58	72	61	61	114	12	82
9819	NM_030194	chr1	87473474	87495385	-	Sp110	Unmarked	2.125	1.515	28.103	1.431	47	40	74	54	32	94	75	74	66	55	93	47	70	86	19	73
19682	NM_175397	chr1	87473474	87500466	-	Sp110	Unmarked	1.063	0.505	7.762	1.302	95	66	83	56	58	71	80	58	88	42	64	40	59	88	8	43
14240	NM_001013817	chr1	87497277	87541611	+	Sp140	Unmarked	0.708	0.288	15.524	1.925	40	28	75	44	35	98	81	80	50	56	77	64	61	113	14	83
29385	NM_013673	chr1	87546624	87606023	+	Sp100	Unmarked	0.708	0	0.803	1.146	44	40	113	53	27	83	76	65	105	47	63	46	74	82	8	73
15022	NM_177055	chr1	87613657	87633181	-	A630001G21Rik	Unmarked	23.73	2.333	13.918	0.551	77	46	96	55	48	72	72	56	89	55	69	43	61	75	18	67
15521	NM_133781	chr1	87690021	87748152	+	Cab39	H3K4me3-only	177.44	42.167	12.847	0.632	37	18	82	44	18	49	45	46	73	38	99	120	53	53	103	121
13559	NM_022417	chr1	87791084	87805273	+	Itm2c	H3K4me3-only	188.774	24.468	16.862	0.687	56	45	100	35	28	42	59	62	79	53	122	84	73	50	57	54
12390	NR_037692	chr1	87825057	87828331	+	4933407L21Rik	Unmarked	1.771	0.505	19.806	1.027	55	45	81	44	47	81	77	75	55	61	83	51	69	93	8	74
10116	NM_001033290	chr1	87836111	87857630	-	Gpr55	Unmarked	5.313	0.758	27.033	1.264	57	65	101	41	53	57	76	74	92	48	73	45	62	90	7	58
5192	NM_027300	chr1	87918516	87926533	+	Spata3	H3K4me3-only	41.438	5.138	50.586	2.061	79	42	96	60	40	45	57	64	66	49	70	60	92	70	23	86
5201	NM_001122732	chr1	87918516	87926533	+	Spata3	H3K4me3-only	41.438	5.138	50.586	2.061	79	42	96	60	40	45	57	64	66	49	70	60	92	70	23	86
5209	NM_028647	chr1	87918516	87923753	+	Spata3	H3K4me3-only	41.438	5.138	50.586	2.061	79	42	96	60	40	45	57	64	66	49	70	60	92	70	23	86
5224	NM_027029	chr1	87918516	87921244	+	Spata3	H3K4me3-only	41.438	5.138	50.586	2.061	79	42	96	60	40	45	57	64	66	49	70	60	92	70	23	86
623	NM_001144993	chr1	87942437	87952031	+	2810459M11Rik	Bivalent	80.397	9.17	100.637	3.827	64	41	82	40	40	31	62	48	72	53	102	105	50	56	86	67
626	NM_001144992	chr1	87942437	87952031	+	2810459M11Rik	Bivalent	80.397	9.17	100.637	3.827	64	41	82	40	40	31	62	48	72	53	102	105	50	56	86	67
28384	NM_027357	chr1	87961193	88035870	+	Psmd1	H3K4me3-only	364.443	34.643	2.409	0.084	35	37	79	42	32	58	66	57	66	44	99	95	60	74	59	96
20240	NM_008311	chr1	87995611	88008545	-	Htr2b	Unmarked	2.833	0.311	7.227	0.237	133	75	82	60	77	95	60	51	63	43	43	42	77	70	6	22
24290	NM_030184	chr1	88051354	88174859	+	Armc9	H3K4me3-only	231.983	36.753	4.818	0.191	39	35	64	43	40	61	56	106	49	46	68	78	54	120	53	87
23972	NM_027456	chr1	88051389	88149066	+	Armc9	H3K4me3-only	234.462	33.432	4.818	0.191	39	38	64	40	40	55	57	108	48	47	67	80	54	120	54	88
13958	NM_145222	chr1	88199795	88203880	+	B3gnt7	H3K4me3-only	165.752	22.508	16.059	0.509	55	22	87	43	22	36	59	55	70	48	118	92	61	66	63	102
27928	NM_010880	chr1	88241293	88256030	-	Ncl	H3K4me3-only	429.256	47.078	2.677	0.081	34	17	76	51	21	35	37	63	65	38	99	122	58	66	112	105
17676	NR_028478	chr1	88247744	88247860	-	Snora75	Unmarked	9.208	2.188	9.903	0.471	85	46	84	47	44	106	91	53	82	65	83	41	50	77	13	32
15772	NR_002851	chr1	88252834	88252902	-	Snord82	H3K4me3-only	79.689	15.15	12.58	0.466	119	71	91	42	64	90	95	37	89	62	49	40	52	62	5	31
28347	NR_015507	chr1	88256148	88264539	+	C130036L24Rik	H3K4me3-only	436.694	51.889	2.409	0.073	34	17	68	38	23	33	69	60	63	64	113	119	37	71	108	82
2576	NM_010341	chr1	88282899	88284716	-	Nmur1	H3K27me3-only	5.667	0.898	71.998	3.666	37	49	53	49	45	79	111	67	47	73	55	71	59	100	27	77
4214	NM_027966	chr1	88322903	88324624	+	1700019O17Rik	Unmarked	6.729	0.96	57.545	2.829	73	56	91	83	45	39	60	57	86	30	44	53	100	76	17	89
24861	NM_008972	chr1	88423310	88427273	+	Ptma	H3K4me3-only	269.879	25.654	4.55	0.125	36	22	51	46	11	38	45	66	50	28	106	132	58	72	114	124
18308	NM_008801	chr1	88439589	88479076	-	Pde6d	H3K4me3-only	410.839	30.041	9.1	0.265	55	31	87	41	23	30	64	52	77	41	155	88	59	66	55	75
26597	NM_172974	chr1	88483674	88503075	+	Cops7b	H3K4me3-only	255.358	26.971	3.479	0.129	46	40	81	53	40	70	62	65	71	48	94	69	63	80	45	72
816	NM_010933	chr1	88562867	88567148	-	Nppc	Bivalent	172.836	23.47	96.89	4.124	35	31	79	46	18	39	71	52	66	42	94	113	71	69	71	102
15131	NM_153530	chr1	88600378	88946672	+	Dis3l2	H3K4me3-only	310.963	35.47	13.65	0.401	28	26	59	43	28	54	68	70	57	52	91	99	44	87	81	112
15135	NM_001172157	chr1	88600378	88946672	+	Dis3l2	H3K4me3-only	310.963	35.47	13.65	0.401	28	26	59	43	28	54	68	70	57	52	91	99	44	87	81	112
5307	NM_007433	chr1	88983265	88986503	-	Alppl2	Unmarked	2.125	0.319	50.051	2.266	47	46	88	45	33	56	73	72	65	46	81	68	81	86	18	94
8943	NM_001081082	chr1	88994576	88998181	-	Alpi	Unmarked	1.063	0.276	31.583	1.958	43	37	101	57	39	50	72	60	66	50	87	60	91	83	3	100
5296	NM_007432	chr1	89021582	89024487	+	Akp3	H3K27me3-only	5.313	1.377	50.051	3.037	36	35	86	52	28	50	81	63	53	57	89	70	91	80	14	114
89	NM_001277925	chr1	89044229	89052711	-	Ecel1	Bivalent	79.335	10.283	121.246	4.49	34	23	83	34	10	30	64	73	72	38	129	102	58	85	66	98
120	NM_021306	chr1	89044229	89052931	-	Ecel1	Bivalent	65.168	8.85	118.302	4.325	38	21	86	39	18	31	56	79	64	39	105	95	64	92	56	116
3732	NM_027084	chr1	89080067	89084979	+	Prss56	Unmarked	13.104	2.491	61.292	2.533	47	33	99	49	27	37	68	56	73	50	110	65	80	68	21	116
6090	NM_021600	chr1	89087171	89096645	+	Chrnd	Unmarked	10.271	2.092	45.233	1.925	63	32	69	81	34	45	66	59	45	35	72	65	103	92	10	128
3147	NM_009604	chr1	89102385	89108410	+	Chrng	H3K27me3-only	5.313	1.377	66.377	3.264	41	34	75	63	32	31	91	59	66	54	95	64	73	94	19	108
26566	NM_023314	chr1	89110488	89137063	+	Eif4e2	H3K4me3-only	223.483	28.967	3.479	0.109	41	24	69	45	19	38	53	59	63	48	106	99	55	59	88	133
26758	NM_001039170	chr1	89110488	89125433	+	Eif4e2	H3K4me3-only	223.483	28.967	3.479	0.109	41	24	69	45	19	38	53	59	63	48	106	99	55	59	88	133
26840	NM_001039169	chr1	89110513	89125433	+	Eif4e2	H3K4me3-only	240.129	29.774	3.479	0.108	40	24	68	43	19	40	50	62	62	46	103	100	53	62	90	137
1104	NM_028889	chr1	89160938	89207366	+	Efhd1	Bivalent	165.752	16.881	91.001	3.46	42	26	83	58	23	37	51	57	71	41	82	97	73	63	75	120
24817	NM_146112	chr1	89223572	89347385	+	Gigyf2	H3K4me3-only	259.962	30.889	4.55	0.141	35	29	74	35	17	35	67	55	62	55	135	103	59	55	79	104
24058	NM_001110212	chr1	89223603	89347385	+	Gigyf2	H3K4me3-only	281.213	33.414	4.818	0.151	32	28	74	34	18	31	68	54	61	55	138	107	57	56	81	105
20026	NM_001110227	chr1	89282858	89291304	-	Kcnj13	Unmarked	1.063	0.217	7.494	0.281	143	67	83	59	75	83	54	45	66	43	52	35	67	65	7	55
4914	NM_028473	chr1	89366838	89372034	+	3110079O15Rik	Unmarked	0.354	0.072	52.46	2.452	32	25	73	35	21	31	83	132	61	55	77	54	51	156	14	99
983	NM_019867	chr1	89373403	89406937	-	Ngef	Bivalent	149.106	30.374	93.945	3.999	23	21	55	68	18	16	53	58	49	36	98	113	77	72	90	152
8345	NM_001111314	chr1	89373403	89470445	-	Ngef	Unmarked	4.958	0.884	33.724	1.749	63	40	99	56	41	53	76	46	73	60	100	57	81	64	14	76
8428	NM_001160163	chr1	89470601	89494415	+	Neu2	Unmarked	5.313	0.891	33.456	1.8	49	40	59	61	40	75	80	76	39	57	64	58	81	99	15	106
8468	NM_001160164	chr1	89470601	89494415	+	Neu2	Unmarked	5.313	0.891	33.456	1.8	49	40	59	61	40	75	80	76	39	57	64	58	81	99	15	106
7400	NM_001160165	chr1	89480596	89494415	+	Neu2	Unmarked	2.479	0.643	38.542	2.818	76	45	94	37	43	68	82	58	62	63	95	61	71	75	10	59
10470	NM_015750	chr1	89491124	89494415	+	Neu2	Unmarked	2.125	0.379	25.694	1.526	48	49	85	54	40	72	70	71	63	44	73	63	85	88	15	79
9705	NM_010566	chr1	89516886	89617083	+	Inpp5d	H3K4me3-only	17.709	5.05	28.639	1.633	49	38	91	43	29	47	91	57	70	65	100	67	73	74	21	84
9713	NM_001110192	chr1	89516886	89617083	+	Inpp5d	H3K4me3-only	17.709	5.05	28.639	1.633	49	38	91	43	29	47	91	57	70	65	100	67	73	74	21	84
9722	NM_001110193	chr1	89516886	89617083	+	Inpp5d	H3K4me3-only	17.709	5.05	28.639	1.633	49	38	91	43	29	47	91	57	70	65	100	67	73	74	21	84
27529	NM_001205391	chr1	89652585	89689003	+	Atg16l1	H3K4me3-only	371.881	46.11	2.944	0.118	67	32	65	49	23	67	47	63	58	42	94	97	65	60	84	86
27806	NM_001205392	chr1	89652585	89689003	+	Atg16l1	H3K4me3-only	371.881	46.11	2.944	0.118	67	32	65	49	23	67	47	63	58	42	94	97	65	60	84	86
27815	NM_029846	chr1	89652585	89689003	+	Atg16l1	H3K4me3-only	371.881	46.11	2.944	0.118	67	32	65	49	23	67	47	63	58	42	94	97	65	60	84	86
18891	NR_028519	chr1	89681145	89681393	+	Scarna6	Unmarked	1.063	0.16	8.565	0.382	86	49	106	41	68	70	71	58	64	76	66	47	63	73	10	51
13555	NM_009118	chr1	89700254	89741732	+	Sag	Unmarked	0.708	0.135	16.862	0.844	83	48	81	50	41	54	80	55	69	46	90	61	69	82	15	75
6019	NM_177646	chr1	89749861	89841064	+	Dgkd	H3K4me3-only	128.564	40.736	45.768	1.892	38	17	59	42	24	34	48	58	47	43	115	118	47	69	101	139
12751	NM_001033291	chr1	89841695	89905126	-	Usp40	H3K4me3-only	129.273	13.654	19.003	0.713	69	45	80	47	46	69	66	49	68	55	107	76	58	61	53	50
12765	NM_001198573	chr1	89841695	89905126	-	Usp40	H3K4me3-only	129.273	13.654	19.003	0.713	69	45	80	47	46	69	66	49	68	55	107	76	58	61	53	50
15418	NM_201641	chr1	89951985	90116577	+	Ugt1a10	Unmarked	4.25	1.212	13.115	0.912	70	58	73	56	52	102	85	76	64	63	53	36	71	92	5	43
15598	NM_201644	chr1	89967353	90116577	+	Ugt1a9	Unmarked	1.771	0.505	12.847	0.894	60	56	67	56	50	126	85	70	57	56	51	47	72	94	7	45
15273	NM_201642	chr1	89991575	90116577	+	Ugt1a7c	Unmarked	1.417	0.337	13.383	1.59	63	48	78	40	32	97	90	78	62	59	61	58	72	93	12	56
14987	NM_201410	chr1	89999831	90115573	+	Ugt1a6b	Unmarked	0.354	1.009	13.918	1.588	91	59	71	46	46	84	97	47	66	55	78	54	64	77	6	58
22842	NM_145079	chr1	90031383	90116577	+	Ugt1a6a	Unmarked	1.771	1.01	5.621	0.844	92	49	70	46	37	93	93	48	63	52	80	54	65	76	7	74
13553	NM_201643	chr1	90062586	90116577	+	Ugt1a5	Unmarked	2.479	0.505	16.862	1.336	91	67	85	44	47	73	93	50	87	54	64	47	62	69	11	55
8277	NM_013701	chr1	90097185	90116577	+	Ugt1a2	Unmarked	2.125	0.337	34.259	2.124	69	55	85	56	32	71	88	54	84	44	65	55	81	75	10	75
3152	NM_008299	chr1	90101306	90102323	-	Dnajb3	H3K4me3-only	50.292	5.516	66.377	2.558	55	23	97	48	27	47	46	53	75	43	106	97	67	60	72	83
6353	NM_201645	chr1	90108533	90116577	+	Ugt1a1	Unmarked	4.958	0.428	43.895	1.159	73	57	70	49	40	91	94	70	63	60	54	54	72	87	14	51
7949	NM_001177364	chr1	90123594	90158864	+	Mroh2a	Unmarked	5.667	0.703	35.865	0.983	56	55	72	52	49	98	83	76	71	61	71	28	59	92	5	71
9455	NM_198652	chr1	90155430	90174154	-	Hjurp	H3K4me3-only	663.718	33.206	29.442	0.383	78	47	71	49	39	67	56	54	69	40	83	74	59	63	55	95
12978	NR_040291	chr1	90159687	90165983	-	6430706D22Rik	Unmarked	8.854	0.664	18.2	0.451	40	51	90	49	41	69	82	77	75	63	68	45	75	85	11	78
9565	NM_172505	chr1	90161402	90174132	-	A730008H23Rik	H3K4me3-only	682.135	34.127	29.174	0.38	76	47	72	49	39	67	58	52	69	41	84	75	60	62	55	93
5961	NM_134252	chr1	90203286	90285426	+	Trpm8	Unmarked	4.25	0.433	46.036	1.412	82	74	70	28	58	125	86	71	61	50	50	52	54	90	7	41
5776	NM_029269	chr1	90303593	90323013	+	Spp2	Unmarked	3.542	0.594	47.107	2.239	65	38	85	57	30	49	82	73	74	58	64	56	77	88	21	82
10763	NM_008132	chr1	90396445	90406641	-	Glrp1	Unmarked	0.354	0.063	24.892	1.203	120	56	71	64	48	63	87	51	69	61	57	44	74	69	16	49
15024	NR_037971	chr1	90448091	90458741	+	Gm19589	Unmarked	1.771	0.842	13.918	1.167	67	45	72	65	42	69	75	76	52	45	55	67	89	102	17	61
3110	NM_177305	chr1	90594800	90598766	-	Arl4c	Bivalent	205.42	25.471	66.913	3.029	33	10	91	41	23	15	39	37	66	35	134	145	53	54	116	107
16291	NR_040493	chr1	90651464	90652308	+	2410088K16Rik	Unmarked	5.313	1.894	11.777	0.525	58	48	80	52	38	67	89	62	63	56	68	60	78	85	10	85
16300	NR_040471	chr1	90912687	90918785	+	1700067G17Rik	H3K4me3-only	30.105	3.066	11.777	0.509	71	33	56	49	31	105	67	100	45	51	56	49	62	115	22	87
16357	NM_133816	chr1	90967036	91050368	+	Sh3bp4	H3K4me3-only	258.546	32.058	11.509	0.357	25	19	61	38	17	40	53	61	55	33	90	125	47	79	98	158
12142	NR_040482	chr1	91256916	91302708	-	C030007H22Rik	Unmarked	1.771	0.721	20.609	1.781	86	53	93	35	40	73	83	61	74	54	78	57	67	76	9	60
6580	NM_178119	chr1	91351385	91791857	+	Agap1	H3K4me3-only	182.753	34.744	42.556	1.305	26	13	62	31	15	62	39	50	44	27	145	157	47	64	127	90
6594	NM_001037136	chr1	91351385	91791857	+	Agap1	H3K4me3-only	182.753	34.744	42.556	1.305	26	13	62	31	15	62	39	50	44	27	145	157	47	64	127	90
12050	NR_015540	chr1	91573081	91580467	-	4933400F21Rik	Unmarked	2.479	0.505	20.877	1.167	76	39	80	69	38	42	73	68	59	55	95	48	91	85	9	72
8521	NM_010262	chr1	91824536	91827751	-	Gbx2	H3K4me3-only	234.108	21.535	33.189	1.076	32	20	73	46	22	28	58	54	58	46	109	125	59	67	98	104
9797	NM_139152	chr1	91849252	91911152	-	Asb18	Unmarked	0.708	0.168	28.103	1.382	61	48	89	56	53	37	85	53	64	56	79	67	76	88	12	75
6121	NM_029122	chr1	91938706	92049976	-	Iqca	Unmarked	9.563	1.435	45.233	2.263	68	27	84	47	29	61	64	73	62	47	78	64	67	93	25	110
25033	NM_007722	chr1	92100554	92112297	+	Cxcr7	H3K4me3-only	107.668	15.353	4.282	0.157	73	39	89	45	33	76	83	53	75	48	85	72	65	82	23	58
25412	NM_001271607	chr1	92100554	92112297	+	Cxcr7	H3K4me3-only	107.668	15.353	4.282	0.157	73	39	89	45	33	76	83	53	75	48	85	72	65	82	23	58
18473	NM_133805	chr1	92499999	92509916	+	Cops8	H3K4me3-only	308.484	38.25	9.1	0.292	81	28	77	38	32	70	78	46	62	83	99	84	49	45	73	54
5613	NM_001243008	chr1	92663434	92740548	-	Col6a3	H3K27me3-only	0.708	0.168	48.177	3.195	53	33	108	35	32	82	75	69	80	62	89	57	64	80	17	63
5614	NM_001243009	chr1	92663434	92740548	-	Col6a3	H3K27me3-only	0.708	0.168	48.177	3.195	53	33	108	35	32	82	75	69	80	62	89	57	64	80	17	63
5782	NM_053015	chr1	92811676	92847719	+	Mlph	H3K4me3-only	30.105	4.293	47.107	2.799	50	23	85	45	22	54	79	63	67	45	118	81	64	95	29	79
5660	NM_001101647	chr1	92849684	92850589	+	Prlh	Unmarked	2.479	0.471	47.642	2.891	53	58	69	62	43	48	88	64	53	52	57	61	93	85	9	104
6063	NM_008998	chr1	92854709	92866197	-	Rab17	Unmarked	18.771	2.974	45.501	1.937	42	29	85	46	19	47	121	53	68	86	92	70	72	79	18	72
6676	NM_001159725	chr1	92854709	92864244	-	Rab17	Unmarked	4.25	1.515	42.021	2.663	41	39	85	44	28	58	98	54	64	60	104	75	77	80	16	76
1147	NM_001111312	chr1	92895303	93025521	+	Lrrfip1	Bivalent	61.272	9.196	90.466	4.031	22	22	54	56	22	33	53	68	41	54	91	99	68	67	87	162
2397	NM_001111311	chr1	92950020	93013899	+	Lrrfip1	H3K4me3-only	89.96	14.252	74.139	2.746	43	20	89	35	20	28	83	46	79	61	156	87	46	68	54	84
2401	NM_008515	chr1	92950020	93025521	+	Lrrfip1	H3K4me3-only	89.96	14.252	74.139	2.746	43	20	89	35	20	28	83	46	79	61	156	87	46	68	54	84
7515	NM_001033408	chr1	93041679	93067372	+	Rbm44	Unmarked	12.396	2.357	38.006	1.748	65	36	83	73	37	67	65	47	61	47	71	71	95	65	31	85
1507	NM_178401	chr1	93076398	93103367	+	Ramp1	Bivalent	45.688	5.665	85.113	3.518	17	23	71	53	25	47	75	63	42	53	109	97	79	87	46	112
1512	NM_016894	chr1	93076398	93121773	+	Ramp1	Bivalent	45.688	5.665	85.113	3.518	17	23	71	53	25	47	75	63	42	53	109	97	79	87	46	112
1514	NM_001168392	chr1	93076398	93103367	+	Ramp1	Bivalent	45.688	5.665	85.113	3.518	17	23	71	53	25	47	75	63	42	53	109	97	79	87	46	112
14304	NM_026454	chr1	93146895	93182602	+	Ube2f	H3K4me3-only	265.275	31.52	15.524	0.582	49	24	65	40	25	41	60	50	58	50	117	115	46	61	98	100
8796	NM_016717	chr1	93194914	93217657	+	Scly	H3K4me3-only	253.587	24.935	32.118	1.255	40	36	73	55	27	40	61	51	67	42	127	95	70	61	70	84
4727	NM_001033292	chr1	93218651	93244880	+	Espnl	H3K27me3-only	3.542	0.722	53.798	3.487	34	30	83	54	26	28	98	52	55	51	92	97	86	95	23	95
8813	NM_027551	chr1	93247649	93258981	+	Klhl30	Unmarked	4.958	2.02	32.118	2.234	52	32	102	53	45	37	69	65	57	56	64	68	85	91	11	112
3220	NM_173395	chr1	93263006	93270794	+	Fam132b	H3K4me3-only	79.335	10.773	65.842	2.608	45	21	91	38	29	24	65	48	67	53	117	107	53	69	71	101
17317	NM_023343	chr1	93272407	93295360	-	Ilkap	H3K4me3-only	170.003	22.035	10.438	0.359	43	29	55	41	21	47	67	53	49	47	108	117	55	64	92	111
4016	NR_026924	chr1	93301456	93302606	-	1700020N18Rik	Unmarked	4.958	1.178	59.151	2.959	47	49	76	44	46	53	71	68	48	46	70	81	75	89	29	107
2932	NM_019479	chr1	93308059	93309799	-	Hes6	H3K4me3-only	131.044	14.947	68.251	2.403	42	22	90	48	25	21	64	40	76	42	137	109	59	65	73	86
2159	NM_011066	chr1	93312558	93355905	-	Per2	Bivalent	111.564	15.908	76.816	3.129	33	31	74	49	18	30	72	48	72	57	114	119	65	50	102	65
10983	NM_028718	chr1	93391244	93425884	+	Traf3ip1	H3K4me3-only	213.566	32.053	24.089	1.108	41	28	92	32	29	38	70	46	70	74	146	101	53	43	84	52
23125	NM_001039126	chr1	93437141	93456167	+	Asb1	H3K4me3-only	255.712	26.043	5.353	0.173	49	20	77	58	25	29	53	61	65	59	105	85	65	59	79	110
21544	NM_023046	chr1	93437656	93456167	+	Asb1	H3K4me3-only	261.025	29.774	6.424	0.235	32	20	75	51	30	43	64	65	56	60	105	86	61	79	63	109
329	NM_007855	chr1	93698053	93744604	+	Twist2	Bivalent	94.564	16.853	109.201	3.798	47	20	91	39	12	26	47	53	64	29	101	134	74	64	89	109
23404	NM_207225	chr1	93829331	94044970	-	Hdac4	Unmarked	1.771	0.316	5.353	0.268	49	45	79	46	38	103	103	56	60	67	68	62	73	85	7	58
17024	NM_024197	chr1	94336295	94370335	-	Ndufa10	H3K4me3-only	369.401	39.016	10.706	0.368	36	31	77	54	25	49	59	68	74	44	98	92	62	78	74	78
12410	NM_147038	chr1	94376257	94377196	-	Olfr1416	Unmarked	0.708	0.505	19.806	1.345	61	61	58	57	47	64	82	85	45	46	48	58	83	107	9	88
12780	NM_001011525	chr1	94387394	94388330	-	Olfr1415	Unmarked	0.354	0.084	18.736	1.09	41	50	67	64	42	67	81	89	53	47	54	54	85	115	6	84
9383	NM_147039	chr1	94407624	94415092	-	Olfr1414	Unmarked	2.833	0.577	29.709	1.366	49	43	80	61	25	54	85	79	66	47	73	59	93	99	7	79
9727	NM_147037	chr1	94469701	94470783	+	Olfr1413	Unmarked	0.708	0.337	28.371	1.798	41	50	75	45	29	66	94	89	61	62	65	57	80	101	10	74
12412	NM_146277	chr1	94484908	94485874	+	Olfr1412	Unmarked	0.708	0.252	19.806	1.066	36	37	73	55	24	74	94	87	60	57	63	56	80	111	7	85
11131	NM_146490	chr1	94493097	94494069	+	Olfr1411	Unmarked	2.125	0.551	23.553	1.638	43	40	63	57	28	52	95	84	47	63	70	60	85	104	12	96
10898	NM_146491	chr1	94504415	94505384	+	Olfr1410	Unmarked	1.417	0.673	24.356	1.654	45	44	73	51	29	62	95	86	58	63	65	56	81	102	9	80
10723	NM_206896	chr1	94516457	94517578	+	Olfr12	Unmarked	1.417	0.367	24.892	1.69	49	43	69	57	29	52	94	80	47	64	61	61	93	97	9	94
14492	NM_001163425	chr1	94533721	94538562	-	Myeov2	H3K4me3-only	257.129	24.442	14.988	0.562	39	38	74	46	32	63	84	57	74	60	90	80	51	75	56	80
14584	NR_028108	chr1	94533721	94538525	-	Myeov2	H3K4me3-only	264.921	26.049	14.721	0.545	36	41	77	41	31	56	88	57	77	61	94	80	50	74	54	82
8520	NM_153114	chr1	94540794	94545418	-	Otos	Unmarked	13.459	1.535	33.189	1.168	56	45	82	53	27	63	78	72	69	57	78	54	85	75	20	85
1741	NM_016696	chr1	94728262	94756773	+	Gpc1	Bivalent	99.522	25.803	81.901	3.486	20	14	62	31	14	16	51	53	58	26	121	143	35	77	115	163
4181	NR_029559	chr1	94746954	94747020	+	Mir149	H3K27me3-only	7.083	1.188	57.813	4.122	58	31	84	39	27	49	90	55	62	60	126	69	66	81	16	86
6404	NM_172850	chr1	94766705	94799483	-	Ankmy1	H3K4me3-only	27.271	3.889	43.627	1.885	48	33	84	56	34	61	74	63	71	54	97	65	68	85	31	75
15495	NM_175118	chr1	94803565	94805197	+	Dusp28	H3K4me3-only	209.316	31.415	13.115	0.44	60	30	61	49	31	54	67	51	51	50	87	104	58	69	77	100
11496	NM_181405	chr1	94807401	94817162	+	Rnpepl1	H3K4me3-only	115.106	41.036	22.483	0.957	29	19	41	52	16	29	58	50	36	34	72	154	59	71	125	154
16305	NR_015525	chr1	94830119	94847167	-	9430060I03Rik	Unmarked	1.771	0.253	11.777	0.494	64	40	85	57	38	65	69	67	57	47	83	60	87	87	9	84
15099	NM_011796	chr1	94830984	94844525	+	Capn10	H3K4me3-only	172.482	23.422	13.65	0.512	55	33	79	64	27	43	62	58	71	43	70	93	78	71	67	85
11233	NM_001104529	chr1	94869695	94882968	+	Gpr35	Unmarked	1.417	0.367	23.286	1.476	46	34	110	42	35	73	86	55	83	54	97	62	68	87	3	64
7421	NM_001271766	chr1	94871923	94882968	+	Gpr35	Unmarked	0.708	0.288	38.274	2.662	66	38	92	62	40	82	64	67	63	57	62	47	88	76	12	83
5472	NM_022320	chr1	94875479	94882968	+	Gpr35	H3K27me3-only	15.584	2.777	48.98	3.174	45	42	88	38	35	46	95	47	69	60	135	77	64	75	23	60
5261	NM_001159658	chr1	94902910	94908846	+	Aqp12	Unmarked	2.125	0.505	50.318	2.989	31	25	80	44	28	48	104	54	52	71	115	80	70	89	19	89
5263	NM_177587	chr1	94902910	94908846	+	Aqp12	Unmarked	2.125	0.505	50.318	2.989	31	25	80	44	28	48	104	54	52	71	115	80	70	89	19	89
150	NM_008440	chr1	94912032	94998442	-	Kif1a	Bivalent	43.209	5.601	116.16	5.343	39	36	70	43	18	42	64	72	55	44	87	92	76	74	58	129
153	NM_001110315	chr1	94912032	94998442	-	Kif1a	Bivalent	43.209	5.601	116.16	5.343	39	36	70	43	18	42	64	72	55	44	87	92	76	74	58	129
5821	NM_016702	chr1	95031816	95041998	+	Agxt	H3K27me3-only	3.896	1.234	46.839	4.309	48	36	81	56	21	38	93	58	66	52	102	75	86	84	19	84
5838	NM_001276710	chr1	95031816	95041998	+	Agxt	H3K27me3-only	3.896	1.234	46.839	4.309	48	36	81	56	21	38	93	58	66	52	102	75	86	84	19	84
2727	NM_001159940	chr1	95047931	95057447	-	2310007B03Rik	H3K27me3-only	3.188	0.699	70.66	3.598	35	29	104	46	28	43	83	50	74	41	111	85	77	91	13	89
2763	NM_172411	chr1	95047931	95057525	-	2310007B03Rik	H3K27me3-only	3.188	0.699	70.392	3.65	33	31	98	51	29	44	87	48	69	43	115	84	82	90	12	83
3381	NM_172463	chr1	95132473	95193025	+	Sned1	H3K4me3-only	137.419	20.624	64.504	2.666	42	13	72	52	18	28	55	55	56	38	102	122	63	77	89	117
25206	NM_178051	chr1	95195787	95202447	-	Mterfd2	H3K4me3-only	267.754	28.28	4.282	0.172	65	41	65	49	38	82	84	59	53	70	92	65	64	70	39	63
24512	NM_080850	chr1	95206013	95239365	-	Pask	H3K4me3-only	290.421	30.674	4.55	0.154	54	27	64	38	36	81	74	62	50	71	93	86	44	74	68	77
25672	NM_023200	chr1	95240221	95264195	+	Ppp1r7	H3K4me3-only	453.694	46.206	4.015	0.133	58	34	79	41	26	35	66	60	69	46	104	94	59	72	65	91
8376	NM_207031	chr1	95270472	95300881	+	Ano7	Unmarked	2.479	0.236	33.724	1.394	55	36	71	58	31	44	98	60	58	54	86	69	76	99	12	92
8400	NM_001271884	chr1	95270472	95300881	+	Ano7	Unmarked	2.479	0.236	33.724	1.394	55	36	71	58	31	44	98	60	58	54	86	69	76	99	12	92
29078	NM_133808	chr1	95302516	95375385	-	Hdlbp	H3K4me3-only	438.819	46.348	1.606	0.045	24	31	74	45	31	37	57	60	62	50	103	102	56	67	84	116
29164	NM_001159717	chr1	95375569	95406309	+	44076	H3K4me3-only	489.82	42.328	1.338	0.039	41	34	63	43	35	32	63	66	55	53	117	98	50	77	80	92
29179	NM_001159718	chr1	95375569	95406309	+	44076	H3K4me3-only	489.82	42.328	1.338	0.039	41	34	63	43	35	32	63	66	55	53	117	98	50	77	80	92
29207	NM_010891	chr1	95375569	95406309	+	44076	H3K4me3-only	489.82	42.328	1.338	0.039	41	34	63	43	35	32	63	66	55	53	117	98	50	77	80	92
29130	NM_001159719	chr1	95375637	95406309	+	44076	H3K4me3-only	492.299	42.542	1.338	0.039	43	34	64	44	35	38	68	63	55	58	116	94	51	74	75	87
5423	NM_145519	chr1	95408680	95518553	+	Farp2	H3K4me3-only	139.898	23.469	49.515	1.989	33	14	93	37	11	26	63	53	72	56	135	109	61	57	81	98
17603	NM_021537	chr1	95517327	95532304	-	Stk25	H3K4me3-only	256.421	34.821	9.903	0.34	46	19	66	51	15	32	74	51	63	57	132	108	58	64	88	75
2850	NM_016778	chr1	95582270	95592339	+	Bok	H3K4me3-only	221.003	23.342	69.322	2.502	45	36	62	37	27	59	72	57	64	49	111	98	43	72	77	90
24834	NM_025920	chr1	95601967	95651415	-	Thap4	H3K4me3-only	367.985	41.974	4.55	0.144	17	9	45	50	10	9	39	50	46	37	127	159	47	53	159	142
26406	NM_174874	chr1	95651609	95686106	+	Atg4b	H3K4me3-only	309.9	36.823	3.747	0.123	16	14	52	42	16	28	60	50	51	56	127	144	42	55	139	107
22779	NM_001105667	chr1	95689152	95698511	-	Dtymk	H3K4me3-only	293.609	38.057	5.621	0.203	69	44	58	48	39	81	75	60	53	55	87	80	58	75	56	61
22962	NM_023136	chr1	95697071	95698511	-	Dtymk	H3K4me3-only	293.609	38.057	5.621	0.203	69	44	58	48	39	81	75	60	53	55	87	80	58	75	56	61
27316	NM_025454	chr1	95700541	95718677	+	Ing5	H3K4me3-only	238.712	21.272	3.212	0.091	31	21	67	44	10	31	61	52	58	45	116	124	64	57	99	119
17464	NM_178882	chr1	95721816	95748751	+	D2hgdh	H3K4me3-only	74.73	10.656	10.171	0.42	44	28	89	40	29	63	88	54	69	78	130	74	59	65	43	46
29869	NM_199366	chr1	95757920	95773071	+	Gal3st2	Unmarked	0	0	0	0	79	62	83	36	51	103	73	70	62	57	80	42	68	76	5	52
26124	NM_001205249	chr1	95815013	95837816	+	Gm9994	Unmarked	0	0	3.747	1.068	69	55	81	50	54	73	94	65	63	66	46	53	69	92	7	62
18474	NM_001039219	chr1	95887085	95908116	+	Gm6086	Unmarked	0.708	1.01	9.1	1.366	50	55	56	49	46	73	76	86	39	45	72	62	76	107	14	93
7603	NM_173772	chr1	95917069	95924907	+	Neu4	Unmarked	1.063	0.379	37.739	2.69	31	41	71	41	38	63	111	78	56	75	90	63	59	111	12	59
8490	NM_008798	chr1	95934881	95949130	-	Pdcd1	Unmarked	5.667	1.243	33.189	1.856	44	32	82	52	33	50	67	73	60	46	111	60	72	96	17	104
19298	NR_040473	chr1	96694018	96699049	+	4930440C22Rik	Unmarked	1.063	0.303	8.03	0.509	83	91	70	36	68	121	94	70	64	71	44	31	64	71	2	19
16025	NM_026321	chr1	97210204	97231861	+	Fam174a	H3K4me3-only	164.336	18.023	12.044	0.399	60	31	69	46	32	54	59	60	62	49	93	92	52	70	75	95
3694	NM_009183	chr1	97484258	97564171	-	St8sia4	H3K4me3-only	105.189	16.665	61.827	2.483	60	49	71	50	33	60	75	61	72	49	63	81	65	72	56	82
3686	NM_001159745	chr1	97523819	97564171	-	St8sia4	H3K4me3-only	105.189	16.665	61.827	2.483	60	49	71	50	33	60	75	61	72	49	63	81	65	72	56	82
19960	NR_040479	chr1	97597760	97613095	-	4930598F16Rik	Unmarked	0.708	0.144	7.494	0.562	106	69	97	42	63	69	80	47	74	68	85	37	71	52	2	37
19435	NR_040467	chr1	97887235	97918335	-	1700063A18Rik	Unmarked	1.417	0.367	8.03	0.382	119	103	61	69	98	105	52	57	59	36	28	22	76	67	4	43
24766	NR_040478	chr1	98508633	98559150	-	4930533P14Rik	Unmarked	2.125	0.356	4.55	0.341	65	90	53	49	86	140	86	66	46	71	41	25	59	78	3	41
25381	NM_172658	chr1	98715360	98768748	-	Slco4c1	H3K4me3-only	287.942	54.742	4.282	0.182	56	20	90	44	19	44	69	66	68	52	103	83	67	81	44	93
15625	NM_001039475	chr1	98802752	98894137	-	Slco6b1	Unmarked	0.354	0.092	12.847	0.796	62	63	62	50	51	132	65	88	62	50	50	37	62	91	21	53
16549	NM_028942	chr1	98956025	99024880	-	Slco6c1	Unmarked	0.354	0.048	11.241	0.89	79	64	70	47	57	131	73	74	62	63	41	34	63	77	15	49
3370	NM_133825	chr1	99540478	99558595	-	D1Ertd622e	H3K4me3-only	176.732	29.648	64.504	2.787	31	25	68	38	25	41	66	45	57	47	120	124	49	63	95	105
16830	NM_173760	chr1	99602622	99666669	-	Ppip5k2	H3K4me3-only	394.548	37.505	10.974	0.364	70	20	74	45	23	54	53	68	63	56	89	87	54	67	79	97
16758	NM_026250	chr1	99666755	99689548	+	Gin1	H3K4me3-only	388.881	41.073	10.974	0.364	48	18	63	55	21	69	58	63	62	47	94	95	52	78	83	93
5272	NM_013626	chr1	99717670	99992209	-	Pam	H3K4me3-only	263.504	41.747	50.318	1.966	31	11	63	37	9	41	51	58	53	40	143	118	49	67	96	132
11983	NR_037993	chr1	99927699	99944370	-	B230216N24Rik	Unmarked	2.479	0.505	20.877	0.976	98	93	59	39	84	96	86	59	43	61	38	51	63	75	10	44
13191	NR_040439	chr1	100028043	100041232	+	1810006J02Rik	Unmarked	1.063	0.202	17.933	0.983	102	81	94	52	83	77	63	57	84	51	46	32	60	71	10	36
14224	NM_001164233	chr1	100317700	100405957	+	Slco6d1	Unmarked	3.188	0.649	15.524	0.805	78	61	66	53	47	114	71	85	64	58	51	34	68	85	19	45
14270	NM_027584	chr1	100317700	100405957	+	Slco6d1	Unmarked	3.188	0.649	15.524	0.805	78	61	66	53	47	114	71	85	64	58	51	34	68	85	19	45
12474	NM_172851	chr1	101669341	102382519	+	Cntnap5b	Unmarked	4.958	1.414	19.806	1.255	93	41	93	47	34	52	78	54	84	42	94	69	63	82	25	48
17428	NR_037989	chr1	103052344	103071779	+	Gm20268	Unmarked	1.417	0.337	10.171	0.744	95	75	107	37	65	74	72	42	92	54	92	37	63	50	3	41
3067	NM_011800	chr1	106665395	106892058	+	Cdh20	Bivalent	84.647	18.567	67.448	3.26	47	29	84	53	22	41	71	58	72	43	115	91	72	79	51	71
3400	NM_001160368	chr1	107173493	107253287	-	Rnf152	H3K4me3-only	224.899	40.082	64.236	2.818	28	9	91	38	20	37	72	62	61	68	121	97	57	77	63	98
3421	NM_178779	chr1	107173493	107253287	-	Rnf152	H3K4me3-only	224.899	40.082	64.236	2.818	28	9	91	38	20	37	72	62	61	68	121	97	57	77	63	98
28601	NM_013784	chr1	107414998	107560253	-	Pign	H3K4me3-only	400.569	36.847	2.141	0.067	29	26	81	41	25	59	60	74	65	47	83	84	58	86	55	126
28600	NM_173187	chr1	107560437	107651708	+	2310035C23Rik	H3K4me3-only	436.694	38.914	2.141	0.07	47	22	80	48	21	24	61	59	74	42	138	94	56	77	68	88
28673	NM_029349	chr1	107560437	107651708	+	2310035C23Rik	H3K4me3-only	436.694	38.914	2.141	0.07	47	22	80	48	21	24	61	59	74	42	138	94	56	77	68	88
1833	NM_009399	chr1	107677299	107744558	+	Tnfrsf11a	Bivalent	133.169	23.734	80.83	3.546	35	18	76	51	24	28	69	43	60	55	137	111	61	63	81	87
10621	NM_001122676	chr1	107886982	107930654	+	Zcchc2	H3K4me3-only	233.399	39.154	25.159	0.875	37	18	64	44	9	19	43	68	63	38	98	124	54	63	119	138
10666	NM_001122675	chr1	107886982	107930654	+	Zcchc2	H3K4me3-only	233.399	39.154	25.159	0.875	37	18	64	44	9	19	43	68	63	38	98	124	54	63	119	138
15242	NR_040630	chr1	108049201	108068101	-	Gm20753	H3K4me3-only	175.315	19.997	13.383	0.46	42	41	69	40	31	65	59	61	66	49	101	92	54	61	78	90
13386	NM_133821	chr1	108068445	108290822	+	Phlpp1	H3K4me3-only	187.357	28.119	17.397	0.584	27	27	44	40	13	18	50	61	59	31	115	140	39	65	136	134
2130	NM_009741	chr1	108434755	108610867	-	Bcl2	Bivalent	153.356	33.638	77.083	3.545	38	17	70	36	16	41	40	49	46	42	116	126	62	45	104	151
2145	NM_177410	chr1	108608349	108610867	-	Bcl2	Bivalent	153.356	33.638	77.083	3.545	38	17	70	36	16	41	40	49	46	42	116	126	62	45	104	151
26185	NM_027534	chr1	108616986	108656319	-	Kdsr	H3K4me3-only	250.754	26.484	3.747	0.137	59	32	67	49	31	48	70	58	55	54	78	95	63	73	67	100
23585	NM_009190	chr1	108667364	108693302	-	Vps4b	H3K4me3-only	286.171	38.861	5.085	0.177	53	38	60	55	43	71	64	56	57	51	103	79	53	75	63	78
14838	NM_009257	chr1	108757756	108779925	+	Serpinb5	Unmarked	8.146	1.223	14.185	0.674	62	49	89	37	44	73	82	61	56	66	92	66	75	73	17	57
14775	NM_027971	chr1	108831025	108853655	+	Serpinb12	Unmarked	1.063	0.217	14.453	0.808	83	74	73	43	69	91	96	56	66	63	60	48	56	84	7	30
13609	NM_001199213	chr1	108835533	108853657	+	Serpinb12	Unmarked	1.063	0.217	16.862	0.874	103	104	65	51	89	117	77	47	62	47	31	35	69	62	2	38
21745	NM_172852	chr1	108877560	108897772	+	Serpinb13	Unmarked	1.063	0.217	6.156	0.303	91	80	61	65	75	139	74	56	62	45	31	32	70	80	4	34
24548	NM_009126	chr1	108942163	108948880	-	Serpinb3a	Unmarked	0.708	0.252	4.55	0.447	132	86	83	52	81	96	72	50	68	56	31	33	71	61	2	25
25537	NM_201376	chr1	108974769	108980057	-	Serpinb3d	Unmarked	0.354	0.092	4.015	0.26	110	82	73	64	76	104	80	49	71	48	28	36	72	76	2	28
28582	NM_198680	chr1	109050537	109057691	-	Serpinb3b	Unmarked	1.417	1.347	2.141	0.278	97	92	66	50	80	107	77	54	59	50	45	37	69	69	3	44
26336	NM_201363	chr1	109167777	109174948	-	Serpinb3c	Unmarked	0.354	0.168	3.747	0.89	96	89	69	49	89	105	70	58	47	60	44	35	71	68	3	46
13289	NM_025867	chr1	109258890	109277052	+	Serpinb11	Unmarked	0.708	0.337	17.665	1.259	91	86	72	35	73	92	103	62	67	78	42	34	53	73	4	34
14480	NM_027548	chr1	109319265	109349266	+	Serpinb7	Unmarked	2.479	0.643	14.988	0.872	107	102	78	35	76	108	62	72	67	47	44	32	72	61	7	29
13875	NM_001174170	chr1	109407999	109422177	+	Serpinb2	Unmarked	1.063	0.16	16.327	0.763	120	103	72	33	87	129	77	54	64	62	26	29	57	54	5	27
13808	NM_011111	chr1	109408086	109422177	+	Serpinb2	Unmarked	0.708	0.112	16.327	0.776	125	99	70	37	85	121	78	52	62	61	30	30	60	54	5	30
17156	NM_001160307	chr1	109425579	109445848	+	Serpinb10	Unmarked	0	0	10.438	1.026	109	75	74	47	65	133	71	62	66	56	40	28	65	67	6	35
17229	NM_198028	chr1	109425579	109445848	+	Serpinb10	Unmarked	0	0	10.438	1.026	109	75	74	47	65	133	71	62	66	56	40	28	65	67	6	35
17813	NM_001159748	chr1	109486582	109502727	+	Serpinb8	H3K4me3-only	29.042	3.313	9.635	0.357	90	39	89	67	36	73	71	47	56	51	58	69	104	64	16	69
17940	NM_011459	chr1	109486582	109505555	+	Serpinb8	H3K4me3-only	29.042	3.313	9.635	0.357	90	39	89	67	36	73	71	47	56	51	58	69	104	64	16	69
13498	NR_102306	chr1	109813835	109847524	+	D830032E09Rik	Unmarked	0	0	17.13	1.253	64	81	69	49	68	129	82	65	58	67	45	34	74	66	8	40
13534	NR_102307	chr1	109813835	109847524	+	D830032E09Rik	Unmarked	0	0	17.13	1.253	64	81	69	49	68	129	82	65	58	67	45	34	74	66	8	40
6719	NM_172853	chr1	111880313	112035578	+	Cdh7	Unmarked	18.417	2.626	41.753	2.381	85	64	73	46	55	107	76	61	62	58	59	44	66	70	16	57
27288	NM_001081386	chr1	112785771	112873949	-	Cdh19	Unmarked	0	0	3.212	0.199	127	61	119	46	65	98	57	45	110	47	54	26	50	60	7	27
19093	NM_001081316	chr1	113755278	113761495	-	Dsel	H3K4me3-only	123.606	13.055	8.297	0.269	48	28	80	38	28	50	57	65	53	42	69	106	66	79	64	126
10978	NM_001077425	chr1	117581713	118477251	+	Cntnap5a	Unmarked	1.063	0.16	24.089	1.347	84	39	93	46	39	62	71	56	77	39	91	76	62	87	29	48
26191	NM_011650	chr1	120195094	120207709	-	Tsn	H3K4me3-only	432.444	68.511	3.747	0.124	39	37	61	34	40	88	59	69	41	49	81	100	50	83	70	98
20815	NM_026472	chr1	120218419	120230408	+	Mki67ip	H3K4me3-only	318.755	39.523	6.959	0.22	51	36	81	48	28	73	70	57	75	53	113	73	62	66	50	63
25137	NM_029709	chr1	120285634	120506039	+	Clasp1	H3K4me3-only	366.214	34.811	4.282	0.109	91	34	73	59	44	85	43	64	50	44	72	77	71	74	55	63
25291	NM_177548	chr1	120285634	120506039	+	Clasp1	H3K4me3-only	366.214	34.811	4.282	0.109	91	34	73	59	44	85	43	64	50	44	72	77	71	74	55	63
25486	NM_001081276	chr1	120285634	120506039	+	Clasp1	H3K4me3-only	366.214	34.811	4.282	0.109	91	34	73	59	44	85	43	64	50	44	72	77	71	74	55	63
14736	NR_027901	chr1	120355245	120355842	-	2900060B14Rik	H3K4me3-only	85.001	6.733	14.453	0.434	88	34	71	59	55	67	65	44	52	50	68	81	57	79	48	81
27043	NM_023755	chr1	120524521	120581745	+	Tfcp2l1	H3K4me3-only	359.839	41.045	3.212	0.085	55	24	88	44	35	36	68	54	52	52	89	103	69	80	52	98
25649	NM_001081125	chr1	120730637	120950196	-	Gli2	H3K4me3-only	287.233	35.615	4.015	0.109	30	19	71	35	16	74	66	68	59	46	98	96	50	84	65	122
2769	NM_008381	chr1	121312041	121318825	-	Inhbb	H3K4me3-only	182.753	30.658	70.124	2.409	43	15	86	41	10	32	45	49	77	31	139	114	54	58	91	114
14839	NM_022327	chr1	121366881	121401359	-	Ralb	H3K4me3-only	195.149	15.899	14.185	0.382	34	25	70	49	23	53	67	61	60	50	131	87	61	76	60	92
13201	NM_146103	chr1	121422730	121425560	+	Tmem185b	H3K4me3-only	253.587	31.443	17.665	0.638	25	16	58	48	18	29	55	74	38	44	78	116	66	87	85	162
17208	NM_145506	chr1	121441609	121545577	-	Epb4.1l5	H3K4me3-only	243.67	25.736	10.438	0.327	48	36	53	35	31	53	72	79	47	62	115	83	45	84	67	89
17312	NM_001113416	chr1	121491400	121545577	-	Epb4.1l5	H3K4me3-only	243.67	25.736	10.438	0.327	48	36	53	35	31	53	72	79	47	62	115	83	45	84	67	89
14680	NM_019933	chr1	121554669	121733648	-	Ptpn4	H3K4me3-only	299.984	40.737	14.453	0.425	28	30	72	35	22	70	59	56	83	39	121	103	32	69	94	86
16632	NM_175106	chr1	121804477	121809745	-	Tmem177	H3K4me3-only	126.085	11.985	11.241	0.406	76	34	76	52	36	82	60	70	57	51	51	73	69	81	45	86
9195	NM_001115074	chr1	121820095	121891787	-	Gm101	Unmarked	2.833	0.577	30.512	1.403	75	74	84	43	59	92	80	54	72	61	55	41	71	57	10	71
1659	NM_001012322	chr1	121903556	121960109	+	Sctr	Bivalent	35.771	3.923	82.972	3.073	68	33	87	40	36	39	79	71	67	63	86	67	57	91	30	85
4226	NM_019432	chr1	121963953	121970357	-	Tmem37	H3K4me3-only	47.459	6.445	57.545	2.218	52	28	78	64	33	49	55	65	64	50	98	71	73	75	52	92
18847	NM_007830	chr1	122009856	122017673	-	Dbi	H3K4me3-only	201.17	40.98	8.565	0.365	73	43	64	41	25	50	70	64	70	40	92	83	53	76	59	96
19018	NM_001037999	chr1	122009856	122017496	-	Dbi	H3K4me3-only	189.128	28.385	8.297	0.364	63	34	68	44	25	45	76	66	73	44	84	81	48	89	54	105
18707	NM_001172074	chr1	122017763	122084766	+	3110009E18Rik	H3K4me3-only	195.149	39.753	8.832	0.365	58	44	79	44	28	70	55	62	67	42	93	85	72	59	60	81
18740	NM_028439	chr1	122017763	122084766	+	3110009E18Rik	H3K4me3-only	195.149	39.753	8.832	0.365	58	44	79	44	28	70	55	62	67	42	93	85	72	59	60	81
8717	NM_133186	chr1	122122992	122161857	-	Steap3	H3K4me3-only	106.96	13.864	32.386	1.126	38	17	83	58	32	43	79	53	66	60	104	78	60	86	43	99
12683	NM_001085409	chr1	122122992	122167659	-	Steap3	Unmarked	2.125	0.319	19.003	0.809	39	50	80	55	42	79	91	63	67	60	85	53	75	86	9	65
1493	NM_207233	chr1	122237158	122239751	+	C1ql2	Bivalent	109.439	14.185	85.381	3.529	26	26	78	42	24	34	75	59	64	60	98	101	58	71	73	110
10677	NM_010766	chr1	122371114	122401661	-	Marco	Unmarked	1.417	0.253	25.159	1.38	80	53	75	48	43	71	79	73	62	47	73	50	71	94	6	74
116	NM_010133	chr1	122499063	122504568	+	En1	Bivalent	41.792	11.917	118.569	5.83	82	33	70	36	24	100	56	71	63	36	73	81	52	82	54	86
23613	NR_038008	chr1	122983981	123017552	+	B230209K01Rik	H3K4me3-only	35.063	4.166	5.085	0.216	77	32	90	45	36	91	82	60	69	66	89	47	62	80	9	64
17732	NM_001271531	chr1	123200929	123224255	-	Insig2	H3K4me3-only	285.817	45.282	9.903	0.434	41	24	97	46	26	35	66	50	86	55	136	81	55	63	60	78
18368	NM_133748	chr1	123200929	123224601	-	Insig2	H3K4me3-only	217.816	31.059	9.1	0.393	44	23	85	50	26	47	64	64	62	54	108	89	70	76	57	80
18425	NM_001271532	chr1	123200929	123224601	-	Insig2	H3K4me3-only	217.816	31.059	9.1	0.393	44	23	85	50	26	47	64	64	62	54	108	89	70	76	57	80
16694	NM_178082	chr1	123200929	123229166	-	Insig2	Unmarked	1.417	0.337	10.974	0.626	63	74	59	55	65	94	89	78	51	56	43	46	73	102	5	46
16331	NM_001025156	chr1	123327643	123403037	+	Ccdc93	H3K4me3-only	145.565	17.296	11.509	0.469	127	34	89	42	36	36	58	54	70	53	118	58	58	61	35	70
16436	NM_029955	chr1	123327643	123403037	+	Ccdc93	H3K4me3-only	145.565	17.296	11.509	0.469	127	34	89	42	36	36	58	54	70	53	118	58	58	61	35	70
1331	NM_010483	chr1	123406349	123425042	-	Htr5b	Bivalent	41.084	6.892	87.522	3.782	63	34	76	52	30	61	71	66	55	43	83	81	77	91	31	85
24655	NM_025860	chr1	123450411	123464557	-	Ddx18	H3K4me3-only	233.754	35.082	4.55	0.213	63	27	67	52	21	80	71	63	63	55	91	75	61	74	55	81
2676	NM_199021	chr1	125228714	125942136	-	Dpp10	Bivalent	78.272	12.401	70.927	3.428	32	24	73	38	18	27	80	58	59	49	110	111	58	83	66	113
27037	NM_001205386	chr1	127289481	127332304	-	Actr3	H3K4me3-only	193.378	22.057	3.212	0.127	45	23	74	54	24	30	53	50	64	27	137	111	63	76	76	92
27163	NM_023735	chr1	127289481	127332304	-	Actr3	H3K4me3-only	193.378	22.057	3.212	0.127	45	23	74	54	24	30	53	50	64	27	137	111	63	76	76	92
27166	NM_001205385	chr1	127289481	127332304	-	Actr3	H3K4me3-only	193.378	22.057	3.212	0.127	45	23	74	54	24	30	53	50	64	27	137	111	63	76	76	92
18203	NM_028787	chr1	127457592	127492261	+	Slc35f5	H3K4me3-only	306.005	39.664	9.368	0.318	15	20	67	35	14	31	85	55	61	56	184	105	47	79	70	75
4505	NM_027677	chr1	127573572	127770438	+	Gpr39	Unmarked	20.896	2.128	55.404	2.052	49	40	86	48	25	55	77	69	68	53	99	65	81	77	24	83
1365	NM_145100	chr1	127768618	127808791	-	Lypd1	Bivalent	101.647	13.175	86.986	3.758	36	17	88	43	22	32	53	64	57	42	112	112	69	79	71	102
2030	NM_176957	chr1	127810212	128727209	-	Nckap5	Bivalent	26.563	3.03	78.422	3.195	73	42	84	47	41	83	73	56	71	55	71	63	61	73	32	74
2034	NM_001081756	chr1	127810212	128727209	-	Nckap5	Bivalent	26.563	3.03	78.422	3.195	73	42	84	47	41	83	73	56	71	55	71	63	61	73	32	74
4199	NM_172484	chr1	127810212	128389504	-	Nckap5	Bivalent	72.251	10.302	57.545	3.039	35	24	64	34	15	117	63	88	49	31	99	78	58	111	31	102
20356	NM_145128	chr1	129101562	129379549	+	Mgat5	H3K4me3-only	238.004	29.511	7.227	0.254	62	32	75	39	36	45	67	68	65	50	85	81	44	89	55	106
200	NM_028135	chr1	129386918	129574598	-	Tmem163	Bivalent	110.502	13.13	114.822	3.559	33	23	73	39	16	22	62	61	58	48	124	108	61	68	79	124
16530	NM_001033041	chr1	129625989	129664141	+	Acmsd	Unmarked	0.708	0.126	11.241	0.616	81	63	56	53	44	96	87	77	63	54	65	38	65	91	12	54
27686	NR_045298	chr1	129650193	129670631	-	2900009J06Rik	H3K4me3-only	420.756	38.704	2.944	0.088	47	25	58	41	29	75	66	69	53	54	95	93	42	85	76	91
27199	NM_028399	chr1	129670740	129701414	+	Ccnt2	H3K4me3-only	454.048	47.956	3.212	0.094	62	25	90	46	24	43	49	47	78	45	108	98	59	50	82	93
9846	NM_011737	chr1	129711847	129736867	-	Map3k19	Unmarked	0.708	0.126	28.103	1.431	71	82	67	38	65	104	94	80	51	74	35	39	71	83	3	42
17103	NM_178690	chr1	129765349	129840453	+	Rab3gap1	H3K4me3-only	270.942	33.595	10.706	0.545	56	37	67	54	32	80	66	79	47	63	55	72	79	77	49	86
27784	NM_027678	chr1	129850762	129998985	-	Zranb3	H3K4me3-only	264.212	20.929	2.944	0.081	80	53	81	37	57	104	82	55	67	69	64	51	48	71	24	56
25909	NM_181750	chr1	129999882	130134312	+	R3hdm1	H3K4me3-only	391.36	50.727	4.015	0.109	48	31	59	37	32	54	64	70	56	53	94	90	39	82	76	114
24687	NR_029543	chr1	130098937	130099007	+	Mir128-1	Unmarked	1.417	0.238	4.55	0.164	90	90	49	49	93	182	66	57	39	43	29	39	57	82	6	28
23905	NM_026390	chr1	130140757	130175954	+	Ubxn4	H3K4me3-only	182.044	16.222	5.085	0.159	40	28	66	53	32	71	64	62	56	62	103	88	60	68	75	71
20984	NM_001081078	chr1	130181340	130224895	-	Lct	Unmarked	1.771	0.459	6.691	0.313	56	48	68	67	43	78	79	71	54	47	52	58	87	98	11	82
27903	NM_008567	chr1	130228167	130256233	-	Mcm6	H3K4me3-only	255.712	40.512	2.677	0.114	68	31	66	43	34	52	76	54	60	51	101	97	46	82	67	71
24738	NM_177445	chr1	130260283	130313993	-	Dars	H3K4me3-only	319.109	45.502	4.55	0.194	52	28	91	50	28	35	52	61	75	45	116	81	66	68	59	92
24703	NM_145507	chr1	130308694	130313993	-	Dars	H3K4me3-only	319.109	45.502	4.55	0.194	52	28	91	50	28	35	52	61	75	45	116	81	66	68	59	92
6191	NM_009911	chr1	130484775	130488876	-	Cxcr4	H3K4me3-only	108.022	14.002	44.698	1.593	65	35	70	53	41	78	75	57	54	67	67	66	63	71	43	94
2471	NM_172485	chr1	131169880	132115855	+	Thsd7b	Bivalent	93.147	11.068	73.336	3.031	25	25	90	38	19	41	74	61	65	44	124	97	69	84	43	100
13367	NM_007827	chr1	132285104	132319576	-	Daf2	Unmarked	15.584	2.777	17.397	1.503	61	44	72	57	43	50	85	57	57	52	84	73	73	89	25	77
23747	NM_010016	chr1	132335606	132359317	-	Cd55	H3K4me3-only	147.336	16.806	5.085	0.21	28	30	64	49	26	44	83	65	53	45	94	96	63	99	48	112
10406	NM_009581	chr1	132473282	132526183	-	Zp3r	Unmarked	1.063	0.217	25.962	1.397	117	70	81	75	75	70	64	51	66	49	48	31	85	70	2	45
16773	NM_007576	chr1	132532497	132558195	-	C4bp	Unmarked	0.708	0.135	10.974	0.53	77	75	72	45	60	90	83	76	61	64	62	35	70	81	5	43
15781	NR_028304	chr1	132566778	132578148	-	C4bp-ps1	Unmarked	1.417	0.311	12.58	0.552	93	72	67	53	65	93	72	72	54	47	42	45	74	89	7	54
13561	NR_027859	chr1	132585619	132612398	-	Pfkfb2	H3K4me3-only	223.483	27.71	16.862	0.594	36	29	86	41	31	78	65	62	57	54	102	84	67	75	45	87
22045	NM_001162415	chr1	132585619	132625830	-	Pfkfb2	Unmarked	0.354	0.05	6.156	0.199	81	73	52	61	64	108	77	69	54	42	50	40	68	95	7	58
13653	NM_008825	chr1	132588831	132612398	-	Pfkfb2	H3K4me3-only	223.483	27.71	16.862	0.594	36	29	86	41	31	78	65	62	57	54	102	84	67	75	45	87
11650	NM_001162416	chr1	132593593	132611153	-	Pfkfb2	Unmarked	12.75	3.306	21.947	0.92	58	54	73	45	53	108	86	67	62	63	63	46	57	88	12	64
24057	NM_178691	chr1	132613903	132618634	+	Yod1	H3K4me3-only	403.402	39.666	4.818	0.17	26	28	54	51	13	48	66	72	63	43	89	95	57	79	81	134
17937	NM_177604	chr1	132628552	132641199	+	AA986860	H3K4me3-only	37.188	4.242	9.635	0.309	75	43	96	48	45	73	61	69	75	48	84	51	67	85	16	63
8693	NM_144960	chr1	132697478	132711317	+	Fcamr	Unmarked	1.417	0.202	32.386	2.008	80	33	104	51	30	47	61	73	70	45	72	63	87	87	13	83
8706	NM_001170632	chr1	132697478	132711317	+	Fcamr	Unmarked	1.417	0.202	32.386	2.008	80	33	104	51	30	47	61	73	70	45	72	63	87	87	13	83
9725	NM_011082	chr1	132723260	132748826	+	Pigr	Unmarked	8.5	0.898	28.371	1.264	83	50	98	50	48	42	72	63	71	57	86	52	79	77	10	61
9480	NM_026976	chr1	132762353	132777367	+	Faim3	Unmarked	1.417	0.289	29.442	1.953	95	39	84	59	38	95	73	68	64	57	59	43	80	83	7	55
5569	NM_053095	chr1	132778650	132783988	-	Il24	Unmarked	2.833	0.621	48.445	2.709	72	61	86	49	55	106	72	51	74	42	60	45	66	76	3	81
8111	NM_021380	chr1	132803768	132807873	-	Il20	Unmarked	3.896	0.694	35.062	1.923	61	48	72	38	39	88	99	80	65	69	75	47	55	101	10	52
9049	NM_001009940	chr1	132829232	132835818	-	Il19	Unmarked	2.125	0.505	31.047	1.845	58	50	84	49	44	76	82	73	68	66	64	47	71	82	16	69
6260	NM_010548	chr1	132916421	132921547	+	Il10	Unmarked	4.604	0.729	44.43	1.667	109	50	83	43	49	68	55	81	62	29	49	59	64	107	12	79
4938	NM_008551	chr1	132950280	132994120	-	Mapkapk2	Bivalent	201.878	41.124	52.192	3.383	29	16	55	44	12	31	41	67	49	33	115	114	54	71	100	168
27767	NM_145508	chr1	133025017	133034811	-	Dyrk3	H3K4me3-only	343.547	39.186	2.944	0.087	40	21	68	40	19	48	65	57	55	47	108	120	54	73	89	95
21908	NM_001136070	chr1	133049783	133070048	+	Eif2d	H3K4me3-only	249.337	35.554	6.156	0.247	94	49	86	40	57	80	62	54	57	60	78	64	61	64	33	60
22013	NM_010709	chr1	133049783	133068811	+	Eif2d	H3K4me3-only	249.337	35.554	6.156	0.247	94	49	86	40	57	80	62	54	57	60	78	64	61	64	33	60
633	NM_018750	chr1	133072986	133141755	-	Rassf5	Bivalent	183.815	20.967	100.369	3.253	16	18	71	43	16	19	54	59	66	41	106	125	50	70	107	138
10549	NM_019777	chr1	133151178	133176140	-	Ikbke	Unmarked	2.125	0.466	25.427	1.151	55	31	105	38	28	61	96	56	83	64	100	60	63	85	7	67
20998	NM_001081011	chr1	133181827	133423938	-	Srgap2	H3K4me3-only	251.462	23.131	6.691	0.185	28	30	55	42	39	59	58	79	43	53	97	86	45	93	70	122
23670	NM_175382	chr1	133424565	133436449	+	Fam72a	H3K4me3-only	194.086	17.295	5.085	0.141	85	27	102	42	29	34	55	51	96	40	106	84	46	68	63	71
2732	NM_011924	chr1	133495690	133508577	+	Avpr1b	Unmarked	15.229	2.068	70.66	2.92	42	30	61	62	23	62	64	117	41	45	49	59	90	128	20	106
9071	NM_007799	chr1	133534890	133572084	+	Ctse	Unmarked	3.896	0.926	31.047	2.213	82	63	64	54	53	118	84	62	54	61	48	45	73	76	12	50
9440	NM_145509	chr1	133585271	133610041	+	5430435G22Rik	Unmarked	1.417	0.337	29.442	1.473	80	35	95	54	21	32	96	57	89	59	65	59	74	79	16	88
6180	NM_177243	chr1	133640598	133666982	+	Slc26a9	Unmarked	8.146	2.112	44.965	1.886	58	31	92	48	30	52	65	67	61	44	77	66	80	88	14	126
13656	NM_178079	chr1	133693971	133714692	+	Pm20d1	H3K4me3-only	75.793	12.008	16.862	0.829	59	39	62	64	41	73	64	81	39	49	72	68	84	99	30	75
21435	NM_173865	chr1	133724588	133745440	+	Slc41a1	H3K4me3-only	311.317	38.601	6.424	0.223	41	27	85	45	16	36	56	61	78	42	126	88	63	63	67	105
13832	NM_144875	chr1	133763853	133769464	+	Rab7l1	H3K4me3-only	152.648	12.803	16.327	0.461	93	34	77	56	34	73	66	58	70	56	90	58	63	67	42	62
25990	NM_001145804	chr1	133807034	133832898	+	Nucks1	H3K4me3-only	288.65	32.925	4.015	0.123	50	40	65	42	26	50	59	58	61	43	135	100	60	60	81	69
26014	NM_175294	chr1	133807034	133832898	+	Nucks1	H3K4me3-only	288.65	32.925	4.015	0.123	50	40	65	42	26	50	59	58	61	43	135	100	60	60	81	69
4400	NM_001177628	chr1	133859491	133879549	+	Slc45a3	H3K4me3-only	199.753	20.344	56.207	1.652	40	17	74	29	18	52	63	48	54	55	119	116	47	57	88	122
10716	NM_145977	chr1	133867185	133879549	+	Slc45a3	Unmarked	20.542	2.343	24.892	1.029	49	36	97	45	39	70	74	58	58	71	90	58	80	64	16	94
26316	NM_007923	chr1	133904181	133922261	+	Elk4	H3K4me3-only	272.358	36.985	3.747	0.167	73	13	83	42	22	33	51	44	71	56	135	105	45	47	98	81
705	NM_172510	chr1	133923197	133964639	-	Mfsd4	Bivalent	86.772	9.898	99.298	4.642	38	24	67	45	24	42	69	58	53	46	95	108	59	81	71	119
694	NM_001114662	chr1	133933359	133964639	-	Mfsd4	Bivalent	86.772	9.898	99.298	4.642	38	24	67	45	24	42	69	58	53	46	95	108	59	81	71	119
12685	NM_008795	chr1	134010123	134036262	-	Cdk18	H3K4me3-only	140.96	20.1	19.003	0.661	48	27	93	40	31	61	56	44	68	41	133	88	61	63	49	96
4024	NM_001033250	chr1	134088012	134153959	+	Lemd1	H3K4me3-only	133.169	14.065	59.151	1.576	55	30	91	28	22	46	81	46	79	56	122	93	49	63	55	83
18871	NR_029777	chr1	134094664	134094761	+	Mir135b	H3K4me3-only	72.251	9.365	8.565	0.309	40	39	75	40	40	71	88	60	61	53	118	67	52	96	19	80
929	NM_144810	chr1	134195202	134203934	+	Klhdc8a	Bivalent	116.168	22.085	94.748	3.973	36	20	58	49	20	38	83	57	53	57	112	105	53	83	75	100
2341	NM_028778	chr1	134212701	134230065	+	Nuak2	H3K4me3-only	89.606	10.221	74.942	2.812	48	31	70	49	26	57	54	76	56	44	89	95	69	81	71	83
2349	NM_001195025	chr1	134212701	134230065	+	Nuak2	H3K4me3-only	89.606	10.221	74.942	2.812	48	31	70	49	26	57	54	76	56	44	89	95	69	81	71	83
7173	NM_178874	chr1	134252891	134287858	-	Tmcc2	H3K4me3-only	101.647	16.104	39.612	1.43	45	29	68	28	22	31	58	56	55	35	128	119	48	73	82	122
15699	NM_172516	chr1	134314029	134363536	+	Dstyk	H3K4me3-only	168.94	19.27	12.58	0.408	66	27	88	39	30	50	46	59	69	45	106	95	55	63	75	86
24619	NM_172517	chr1	134373943	134402242	+	Rbbp5	H3K4me3-only	481.674	49.055	4.55	0.125	62	42	92	51	44	89	63	48	86	54	85	67	55	59	52	50
18030	NM_029025	chr1	134402806	134405216	+	Tmem81	Unmarked	1.771	0.21	9.368	0.382	72	56	87	41	60	88	81	68	58	67	58	55	66	86	13	43
3808	NM_177129	chr1	134406001	134439517	-	Cntn2	H3K4me3-only	41.792	5.182	60.757	2.25	51	34	93	42	25	58	68	50	66	38	110	95	77	71	39	82
1974	NM_182716	chr1	134461266	134638374	-	Nfasc	Bivalent	79.335	10.773	78.957	3.412	39	28	60	52	23	70	59	86	48	48	88	75	69	92	52	110
1979	NM_001160317	chr1	134461266	134638374	-	Nfasc	Bivalent	79.335	10.773	78.957	3.412	39	28	60	52	23	70	59	86	48	48	88	75	69	92	52	110
3709	NM_001160318	chr1	134461266	134603903	-	Nfasc	H3K27me3-only	6.729	1.476	61.56	3.735	41	39	94	48	39	51	79	56	70	55	117	70	72	80	23	65
6540	NM_001160316	chr1	134461266	134539435	-	Nfasc	H3K27me3-only	3.188	1.299	42.824	3.489	37	47	84	49	34	80	84	66	76	49	90	59	70	88	15	71
3725	NR_045892	chr1	134625929	134629403	+	Gm10538	Unmarked	4.25	0.808	61.292	2.865	70	48	96	60	33	47	67	65	72	53	68	56	99	64	18	83
19489	NM_010732	chr1	134776931	134836582	+	Lrrn2	H3K4me3-only	150.877	15.366	8.03	0.244	32	23	86	41	18	35	69	42	77	41	128	116	56	64	79	92
28974	NM_008575	chr1	134886421	134921925	-	Mdm4	H3K4me3-only	331.151	52.464	1.606	0.088	61	29	79	34	35	63	72	65	67	61	117	73	40	83	50	70
8247	NM_001099276	chr1	134942588	135005265	+	Pik3c2b	H3K4me3-only	246.15	36.943	34.259	1.285	38	21	77	43	20	38	55	50	73	44	124	108	49	60	92	107
23541	NM_133819	chr1	135027742	135036377	+	Ppp1r15b	H3K4me3-only	283.338	21.837	5.085	0.118	42	35	67	50	34	48	54	71	65	50	93	90	53	73	84	90
4739	NM_001160268	chr1	135142673	135200012	+	Plekha6	Unmarked	4.958	0.707	53.798	2.6	52	38	103	42	31	53	84	59	71	57	103	70	80	79	12	65
4742	NM_182930	chr1	135142673	135200012	+	Plekha6	Unmarked	4.958	0.707	53.798	2.6	52	38	103	42	31	53	84	59	71	57	103	70	80	79	12	65
5733	NR_037984	chr1	135146428	135166385	-	Gm19461	Unmarked	5.313	0.758	47.374	2.016	51	28	109	73	33	25	56	58	79	37	86	70	98	82	21	93
8780	NM_026680	chr1	135206399	135219603	+	Golt1a	Unmarked	4.25	0.638	32.118	1.347	68	35	85	46	30	49	80	63	62	61	101	61	74	77	20	87
21521	NM_178260	chr1	135223788	135226299	+	Kiss1	H3K4me3-only	21.25	3.787	6.424	0.221	45	37	54	56	33	71	80	92	43	44	59	56	70	125	9	125
6596	NM_031193	chr1	135247142	135256900	+	Ren2	Unmarked	3.896	0.397	42.556	1.084	68	40	114	45	46	50	73	45	89	49	120	60	64	75	11	50
6660	NM_031192	chr1	135247250	135256896	+	Ren1	Unmarked	3.896	0.397	42.021	1.08	75	46	116	45	52	54	68	47	89	52	108	53	66	69	10	49
2079	NM_175443	chr1	135260148	135276895	+	Etnk2	H3K4me3-only	282.629	25.998	77.886	1.836	32	31	72	40	21	31	77	53	61	48	126	101	61	72	62	111
9509	NM_011439	chr1	135278876	135320789	-	Sox13	H3K4me3-only	184.524	58.468	29.174	1.28	16	7	91	32	6	24	44	58	82	27	125	133	43	74	106	131
22413	NM_009227	chr1	135500447	135506857	-	Snrpe	H3K4me3-only	350.63	58.821	5.888	0.258	49	32	84	41	26	39	61	52	79	45	127	98	51	62	78	75
26675	NM_144530	chr1	135516447	135557976	-	Zc3h11a	H3K4me3-only	279.442	30.647	3.479	0.109	58	33	58	54	38	98	65	63	53	52	77	67	53	82	49	99
26936	NM_001276767	chr1	135516447	135557976	-	Zc3h11a	H3K4me3-only	279.442	30.647	3.479	0.109	58	33	58	54	38	98	65	63	53	52	77	67	53	82	49	99
26303	NM_001166552	chr1	135552455	135557462	-	Zbed6	H3K4me3-only	499.028	56.921	3.747	0.127	40	31	65	50	37	75	52	70	64	47	100	64	45	81	57	121
18124	NM_172842	chr1	135575605	135586593	-	Lax1	Unmarked	8.146	0.726	9.368	0.33	66	36	81	65	41	68	99	51	63	82	66	50	79	73	14	65
18889	NM_001159649	chr1	135575605	135586685	-	Lax1	Unmarked	7.438	0.684	8.565	0.302	75	38	73	67	39	64	104	54	61	83	67	46	79	75	13	61
9938	NM_213616	chr1	135599250	135650324	-	Atp2b4	H3K4me3-only	44.98	8.016	27.568	1.483	63	59	82	51	57	91	63	79	68	50	48	41	67	90	14	76
9958	NM_001167949	chr1	135599250	135650324	-	Atp2b4	H3K4me3-only	44.98	8.016	27.568	1.483	63	59	82	51	57	91	63	79	68	50	48	41	67	90	14	76
966	NM_001160420	chr1	135793770	135804576	-	Optc	H3K27me3-only	13.104	1.967	94.213	4.133	48	38	87	30	25	58	90	75	77	72	122	53	53	80	24	67
1361	NM_001160421	chr1	135793770	135803750	-	Optc	H3K27me3-only	4.25	0.638	86.986	3.445	69	41	87	45	31	53	97	62	75	74	100	46	67	75	11	66
1363	NM_054076	chr1	135793770	135803750	-	Optc	H3K27me3-only	4.25	0.638	86.986	3.445	69	41	87	45	31	53	97	62	75	74	100	46	67	75	11	66
1366	NM_001160422	chr1	135797412	135803750	-	Optc	H3K27me3-only	4.25	0.638	86.986	3.445	69	41	87	45	31	53	97	62	75	74	100	46	67	75	11	66
6144	NM_054077	chr1	135806881	135817978	-	Prelp	Unmarked	3.896	0.654	44.965	2.466	60	31	89	48	28	63	74	87	60	53	57	63	79	105	13	89
6026	NM_021355	chr1	135934091	135944854	+	Fmod	Unmarked	1.417	0.253	45.768	2.664	77	44	92	46	37	62	74	62	73	42	83	62	72	88	11	74
14268	NM_007570	chr1	135971441	135975732	-	Btg2	H3K4me3-only	211.441	33.498	15.524	0.624	37	33	74	49	19	37	59	72	76	52	116	79	61	65	73	97
11687	NM_027979	chr1	136007818	136048013	+	Chit1	Unmarked	6.021	1.145	21.947	0.963	101	48	101	41	45	75	82	53	74	63	62	55	71	69	9	50
7729	NM_007695	chr1	136078980	136086608	+	Chi3l1	Unmarked	7.792	1.234	36.936	1.756	71	32	103	49	32	46	62	56	83	33	119	58	69	85	10	91
9803	NM_016749	chr1	136090024	136097809	+	Mybph	H3K4me3-only	15.938	3.247	28.103	1.252	42	26	93	52	21	33	83	55	71	36	96	81	80	97	11	122
408	NM_001039510	chr1	136095798	136132008	-	Adora1	Bivalent	82.168	13.784	106.257	4.392	36	28	84	42	24	42	77	50	77	57	137	81	53	66	54	91
411	NM_001008533	chr1	136095798	136132004	-	Adora1	Bivalent	82.522	13.844	106.257	4.392	33	28	84	42	24	42	77	50	76	58	138	82	53	66	55	91
5797	NM_031189	chr1	136186580	136189125	+	Myog	Unmarked	6.729	1.476	46.839	2.842	56	33	99	43	28	41	74	41	80	43	117	79	67	66	30	102
9886	NM_001144855	chr1	136193359	136229505	-	Ppfia4	Unmarked	3.896	1.234	27.836	1.26	34	29	64	57	14	43	82	62	54	36	109	79	83	93	22	138
20614	NM_020588	chr1	136242673	136258576	-	Tmem183a	H3K4me3-only	299.984	53.464	6.959	0.268	49	38	71	45	28	54	60	54	81	40	125	91	44	65	81	73
20664	NM_001042485	chr1	136242673	136258576	-	Tmem183a	H3K4me3-only	299.984	53.464	6.959	0.268	49	38	71	45	28	54	60	54	81	40	125	91	44	65	81	73
28114	NM_173771	chr1	136282516	136287560	+	4933406M09Rik	H3K4me3-only	19.125	3.636	2.677	0.108	107	63	80	59	52	91	64	60	66	43	70	37	85	69	2	51
27466	NM_028057	chr1	136302566	136308315	+	Cyb5r1	H3K4me3-only	308.13	32.544	2.944	0.187	50	29	66	47	30	54	65	82	52	43	88	83	60	104	47	99
23916	NM_028320	chr1	136312043	136328918	+	Adipor1	H3K4me3-only	292.192	37.873	5.085	0.191	51	21	76	32	26	27	53	47	59	55	136	112	44	51	97	112
12967	NM_153128	chr1	136352131	136387450	+	Klhl12	H3K4me3-only	341.068	64.842	18.468	0.863	43	28	77	43	36	56	56	66	58	52	95	85	54	78	62	110
27002	NM_145510	chr1	136391236	136404461	+	Rabif	H3K4me3-only	250.754	25.538	3.479	0.104	50	38	73	44	52	53	72	51	54	56	78	96	49	80	62	91
20485	NR_026896	chr1	136437521	136443599	-	4931440L10Rik	Unmarked	5.667	0.851	7.227	0.312	76	56	105	41	39	48	79	62	85	57	93	49	78	68	6	57
20549	NM_001145300	chr1	136437521	136443599	-	4931440L10Rik	Unmarked	5.667	0.851	7.227	0.312	76	56	105	41	39	48	79	62	85	57	93	49	78	68	6	57
26797	NM_152895	chr1	136456754	136529455	+	Kdm5b	H3K4me3-only	301.4	27.725	3.479	0.138	48	28	69	37	31	54	66	64	64	55	105	90	39	78	75	96
902	NM_009307	chr1	136543257	136645994	+	Syt2	Bivalent	158.669	20.566	95.284	3.396	23	15	71	31	11	38	59	72	57	50	116	109	49	78	86	134
13355	NM_001081307	chr1	136662519	136852517	-	Ppp1r12b	H3K4me3-only	242.254	22.284	17.397	0.644	64	37	84	47	46	56	73	48	62	56	99	93	59	74	54	47
5758	NR_015606	chr1	136676299	136700298	-	Ppp1r12b	Unmarked	3.542	0.594	47.374	2.078	66	45	85	50	39	89	80	68	71	58	75	51	70	83	16	53
23503	NM_001278115	chr1	136859141	136870756	+	Ube2t	H3K4me3-only	206.482	28.039	5.085	0.181	68	29	83	51	42	72	66	49	64	62	79	81	58	66	58	71
23568	NM_026024	chr1	136859141	136870756	+	Ube2t	H3K4me3-only	206.482	28.039	5.085	0.181	68	29	83	51	42	72	66	49	64	62	79	81	58	66	58	71
2888	NM_001033409	chr1	136882929	137001853	-	Lgr6	Bivalent	131.398	24.981	68.786	4.67	43	19	52	41	15	64	84	62	47	50	69	103	50	92	65	143
7900	NM_007955	chr1	137005074	137029152	-	Ptprv	Unmarked	5.313	1.01	36.133	1.561	35	26	84	50	25	47	77	73	52	44	90	77	82	105	12	120
7837	NM_177081	chr1	137029301	137041897	+	Ptpn7	Unmarked	7.438	1.326	36.4	1.674	44	30	99	47	24	35	83	51	71	48	116	78	81	80	15	97
8824	NM_026823	chr1	137043410	137052845	+	Arl8a	H3K4me3-only	261.379	43.848	32.118	1.431	44	24	64	44	21	31	44	49	55	38	150	126	56	52	110	91
12038	NM_134438	chr1	137056826	137064258	-	Gpr37l1	Unmarked	5.667	0.951	20.877	1.123	72	46	80	53	35	42	76	54	63	44	87	68	81	75	19	104
28236	NM_007921	chr1	137150150	137155049	-	Elf3	H3K4me3-only	199.399	21.06	2.409	0.092	35	35	82	52	27	71	70	62	63	48	90	68	79	77	26	114
28476	NM_001163131	chr1	137150150	137155049	-	Elf3	H3K4me3-only	199.399	21.06	2.409	0.092	35	35	82	52	27	71	70	62	63	48	90	68	79	77	26	114
11814	NM_145417	chr1	137159275	137180661	-	Rnpep	H3K4me3-only	195.857	27.928	21.412	0.985	36	24	68	58	20	40	85	48	66	61	105	98	64	68	72	86
11853	NM_001159624	chr1	137159275	137180661	-	Rnpep	H3K4me3-only	195.857	27.928	21.412	0.985	36	24	68	58	20	40	85	48	66	61	105	98	64	68	72	86
24310	NM_011590	chr1	137198111	137210314	-	Timm17a	H3K4me3-only	372.943	39.39	4.818	0.183	58	51	71	48	41	50	73	61	70	50	75	79	59	74	55	84
3274	NM_053106	chr1	137221389	137264642	+	Lmod1	Unmarked	14.875	1.571	65.307	2.483	65	27	84	50	29	57	78	59	60	55	86	71	72	84	25	97
2560	NM_175259	chr1	137268032	137271640	-	Shisa4	H3K4me3-only	89.251	14.14	72.266	2.483	32	20	93	33	16	37	79	52	69	55	143	94	60	72	46	98
14868	NM_153774	chr1	137278891	137327068	-	Ipo9	H3K4me3-only	302.817	35.981	14.185	0.506	44	35	81	30	32	50	69	49	71	57	145	94	43	58	72	69
6054	NM_173437	chr1	137331156	137481932	-	Nav1	H3K4me3-only	144.502	18.73	45.501	1.458	36	25	72	33	13	54	49	81	53	33	70	110	64	85	75	146
21786	NM_007791	chr1	137625773	137648806	+	Csrp1	H3K4me3-only	186.649	20.47	6.156	0.225	47	28	73	41	28	57	76	70	51	70	85	74	62	77	46	114
18064	NM_013750	chr1	137662661	137665711	+	Phlda3	H3K4me3-only	315.921	31.064	9.368	0.342	26	18	97	31	14	20	61	40	70	39	142	137	62	57	89	96
16557	NM_021467	chr1	137695997	137707566	+	Tnni1	Unmarked	7.792	1.307	11.241	0.605	45	29	93	47	23	57	94	62	62	67	110	66	84	82	9	69
17025	NM_001112702	chr1	137696087	137707566	+	Tnni1	Unmarked	7.792	1.389	10.706	0.599	42	29	92	44	22	60	96	64	63	66	107	67	80	86	9	72
5084	NM_133664	chr1	137715174	137729918	+	Lad1	H3K4me3-only	145.565	16.604	51.389	1.647	17	20	70	44	26	54	57	66	51	53	115	103	58	76	79	110
7143	NM_001130174	chr1	137732910	137748845	+	Tnnt2	Unmarked	1.771	0.337	39.612	1.793	38	46	82	43	37	75	86	67	62	49	68	66	72	94	9	105
7147	NM_001130179	chr1	137732910	137748845	+	Tnnt2	Unmarked	1.771	0.337	39.612	1.793	38	46	82	43	37	75	86	67	62	49	68	66	72	94	9	105
7156	NM_011619	chr1	137732910	137748845	+	Tnnt2	Unmarked	1.771	0.337	39.612	1.793	38	46	82	43	37	75	86	67	62	49	68	66	72	94	9	105
7157	NM_001130181	chr1	137732910	137748845	+	Tnnt2	Unmarked	1.771	0.337	39.612	1.793	38	46	82	43	37	75	86	67	62	49	68	66	72	94	9	105
7162	NM_001130175	chr1	137732910	137748845	+	Tnnt2	Unmarked	1.771	0.337	39.612	1.793	38	46	82	43	37	75	86	67	62	49	68	66	72	94	9	105
7171	NM_001130180	chr1	137732910	137748845	+	Tnnt2	Unmarked	1.771	0.337	39.612	1.793	38	46	82	43	37	75	86	67	62	49	68	66	72	94	9	105
7189	NM_001130178	chr1	137732910	137748845	+	Tnnt2	Unmarked	1.771	0.337	39.612	1.793	38	46	82	43	37	75	86	67	62	49	68	66	72	94	9	105
7199	NM_001130177	chr1	137732910	137748845	+	Tnnt2	Unmarked	1.771	0.337	39.612	1.793	38	46	82	43	37	75	86	67	62	49	68	66	72	94	9	105
7408	NM_001130176	chr1	137737437	137748838	+	Tnnt2	Unmarked	12.396	1.768	38.542	1.998	56	39	87	50	31	65	82	69	66	64	80	59	79	79	20	73
621	NM_019645	chr1	137767971	137815601	-	Pkp1	Bivalent	108.731	14.093	100.637	4.629	27	19	81	54	11	25	62	63	68	39	104	109	74	78	73	112
4031	NM_177642	chr1	137850154	137902919	-	Igfn1	Unmarked	2.479	0.643	59.151	2.518	82	70	86	42	68	92	73	51	60	50	68	55	70	73	5	54
4521	NM_001160145	chr1	137904795	137931607	+	Tmem9	H3K4me3-only	114.398	23.304	55.404	2.772	66	59	64	53	48	95	82	66	58	65	70	48	70	73	25	57
19204	NM_025439	chr1	137914577	137931607	+	Tmem9	H3K4me3-only	236.941	32.176	8.297	0.329	73	38	85	39	42	67	74	57	64	53	112	71	55	82	29	58
18396	NM_001160146	chr1	137914732	137931607	+	Tmem9	H3K4me3-only	286.525	37.139	9.1	0.341	65	35	86	35	36	60	82	54	64	56	122	79	55	81	32	57
1261	NM_001270609	chr1	137947380	137947947	+	Ascl5	Bivalent	41.438	7.878	88.592	4.075	43	21	81	63	23	33	63	52	61	37	75	110	81	80	64	112
1731	NM_001081023	chr1	137949477	138016399	+	Cacna1s	H3K27me3-only	3.188	0.649	81.901	3.958	48	30	95	47	27	40	71	58	79	45	126	66	66	81	24	96
1739	NM_014193	chr1	137949477	138016399	+	Cacna1s	H3K27me3-only	3.188	0.649	81.901	3.958	48	30	95	47	27	40	71	58	79	45	126	66	66	81	24	96
1765	NR_046170	chr1	138024295	138027760	-	Gm15850	H3K4me3-only	93.147	9.486	81.366	2.698	44	30	77	49	21	42	62	59	63	44	128	89	73	68	56	94
1766	NR_046169	chr1	138024295	138027760	-	Gm15850	H3K4me3-only	93.147	9.486	81.366	2.698	44	30	77	49	21	42	62	59	63	44	128	89	73	68	56	94
1777	NR_046167	chr1	138024295	138027760	-	Gm15850	H3K4me3-only	93.147	9.486	81.366	2.698	44	30	77	49	21	42	62	59	63	44	128	89	73	68	56	94
1785	NR_046168	chr1	138024295	138027760	-	Gm15850	H3K4me3-only	93.147	9.486	81.366	2.698	44	30	77	49	21	42	62	59	63	44	128	89	73	68	56	94
1770	NM_001039472	chr1	138027977	138074591	+	Kif21b	H3K4me3-only	140.96	15.46	81.366	2.667	25	25	65	35	15	38	73	65	60	48	117	109	50	80	78	116
15129	NM_028872	chr1	138110098	138130857	-	5730559C18Rik	H3K4me3-only	162.919	16.592	13.65	0.453	66	31	78	39	20	40	61	51	77	39	146	87	51	63	63	87
677	NM_001101516	chr1	138155490	138157450	-	Gpr25	Bivalent	83.23	10.788	99.566	3.837	38	17	60	49	18	25	76	50	46	40	97	128	62	87	77	129
6515	NM_001081360	chr1	138164699	138242681	-	Camsap2	H3K4me3-only	245.087	26.879	43.092	1.307	47	38	67	35	22	36	58	52	59	41	116	126	59	52	101	90
21741	NR_024328	chr1	138308492	138312096	-	9230116N13Rik	H3K4me3-only	190.545	31.965	6.156	0.193	91	42	78	49	37	49	43	45	64	36	90	96	69	47	74	89
23083	NM_026500	chr1	138311847	138336797	+	Ddx59	H3K4me3-only	177.44	25.302	5.353	0.173	54	34	49	38	30	74	65	61	45	48	98	100	46	75	79	103
12513	NM_001081258	chr1	138364534	138428088	+	Kif14	Unmarked	18.063	2.576	19.538	0.763	79	51	92	49	46	73	84	61	83	69	66	44	63	72	20	47
23086	NM_001160251	chr1	138521477	138526968	+	Zfp281	H3K4me3-only	175.669	31.308	5.353	0.173	50	22	62	37	27	45	39	64	40	37	110	122	54	70	99	121
23287	NM_177643	chr1	138521477	138526968	+	Zfp281	H3K4me3-only	175.669	31.308	5.353	0.173	50	22	62	37	27	45	39	64	40	37	110	122	54	70	99	121
13827	NR_045324	chr1	138579972	138587382	+	Gm19705	Unmarked	13.459	1.828	16.327	0.675	74	61	76	44	47	89	89	50	61	57	86	59	73	67	12	54
13608	NR_045325	chr1	138580205	138587382	+	Gm19705	Unmarked	10.979	1.957	16.862	0.668	58	52	74	42	38	97	102	54	65	62	77	61	66	79	12	60
26443	NR_037986	chr1	138592787	138622305	+	Gm16880	H3K4me3-only	60.209	5.538	3.747	0.115	85	45	90	51	46	68	79	47	78	66	91	48	62	61	23	59
27469	NM_001159769	chr1	138740160	138850207	-	Nr5a2	H3K4me3-only	180.274	21.42	2.944	0.095	82	37	80	39	41	145	53	64	54	47	83	55	61	73	24	61
16391	NM_030676	chr1	138740160	138857025	-	Nr5a2	Unmarked	0.354	0.067	11.509	0.576	81	74	71	48	61	120	77	66	54	57	44	43	78	74	5	46
8742	NR_029795	chr1	139863031	139863118	+	Mir181a-1	Unmarked	2.125	0.551	32.386	1.847	99	71	45	51	59	118	82	69	47	54	41	43	61	85	17	57
8642	NR_029820	chr1	139863215	139863295	+	Mir181b-1	Unmarked	1.771	0.421	32.653	2.024	97	59	47	49	44	111	81	77	49	54	53	44	62	89	19	64
14952	NM_011210	chr1	139959435	140071882	-	Ptprc	Unmarked	0.354	0.063	13.918	0.863	89	64	84	51	68	141	72	42	68	59	48	41	63	59	12	38
15047	NM_001268286	chr1	139959435	140071882	-	Ptprc	Unmarked	0.354	0.063	13.918	0.863	89	64	84	51	68	141	72	42	68	59	48	41	63	59	12	38
15144	NM_001111316	chr1	139959435	140071703	-	Ptprc	Unmarked	1.417	0.253	13.65	0.721	100	70	76	46	69	151	74	45	67	53	46	39	56	64	9	34
11889	NM_177397	chr1	140170314	140186039	+	Atp6v1g3	Unmarked	1.063	0.276	21.412	1.526	91	53	89	59	43	78	74	60	73	53	67	41	85	71	4	58
15140	NM_021605	chr1	140381290	140516273	-	Nek7	H3K4me3-only	240.129	31.125	13.65	0.432	53	29	74	42	33	41	61	48	67	50	124	100	44	63	83	87
11433	NR_040304	chr1	140536671	140578652	-	Gm5833	Unmarked	1.417	0.337	22.75	1.158	98	73	70	43	53	112	92	47	66	49	56	57	67	70	10	36
276	NM_001025565	chr1	140721762	140739021	-	Lhx9	Bivalent	44.271	6.313	111.075	3.959	67	38	47	40	34	104	85	83	46	72	67	50	45	93	36	92
419	NM_010714	chr1	140721762	140744156	-	Lhx9	Bivalent	17.354	3.299	105.99	3.826	58	31	126	43	29	60	48	50	118	37	118	52	54	59	33	83
277	NM_001042577	chr1	140727523	140739021	-	Lhx9	Bivalent	44.271	6.313	111.075	3.959	67	38	47	40	34	104	85	83	46	72	67	50	45	93	36	92
22538	NM_001081226	chr1	140748555	140753431	-	2310009B15Rik	H3K4me3-only	34.355	13.994	5.621	0.247	45	39	70	45	30	74	56	60	72	37	77	91	52	71	73	107
25109	NM_001166501	chr1	140860285	141072619	+	Dennd1b	H3K4me3-only	211.086	30.099	4.282	0.172	27	18	68	24	13	39	65	43	54	60	152	131	43	43	113	106
20218	NM_181347	chr1	140864297	141072619	+	Dennd1b	Unmarked	1.063	0.379	7.227	0.355	50	60	61	44	62	104	99	75	40	85	54	45	62	92	10	56
13070	NM_133239	chr1	141094830	141273653	-	Crb1	Unmarked	5.667	0.735	18.2	0.798	103	62	88	42	68	96	67	67	62	55	47	43	62	86	5	46
13144	NR_040455	chr1	141276028	141299429	+	4933436E23Rik	Unmarked	10.979	1.842	17.933	1.218	20	40	78	53	23	42	94	72	45	51	78	91	102	98	15	97
10090	NM_172643	chr1	141318959	141349584	+	Zbtb41	H3K4me3-only	279.088	53.059	27.033	1.186	35	21	52	38	15	48	73	58	49	51	138	113	47	74	87	100
21932	NM_009791	chr1	141351349	141390665	+	Aspm	H3K4me3-only	314.151	44.796	6.156	0.217	37	34	61	44	31	83	75	58	55	57	95	92	53	73	68	83
16228	NM_031164	chr1	141398283	141420333	+	F13b	Unmarked	0.708	0.135	11.777	0.542	86	97	64	45	100	142	70	61	48	55	25	37	59	78	6	26
23621	NM_015780	chr1	141443640	141456799	-	Cfhr1	Unmarked	1.417	0.238	5.085	0.279	165	91	61	51	90	103	71	39	50	53	33	32	63	56	3	38
28596	NM_001160304	chr1	141594495	141677816	-	Gm4788	Unmarked	1.771	1.683	2.141	0.763	153	99	65	44	83	106	65	52	56	41	30	34	68	60	1	42
28641	NM_001029977	chr1	141594495	141677816	-	Gm4788	Unmarked	1.771	1.683	2.141	0.763	153	99	65	44	83	106	65	52	56	41	30	34	68	60	1	42
28646	NM_001160303	chr1	141594495	141677816	-	Gm4788	Unmarked	1.771	1.683	2.141	0.763	153	99	65	44	83	106	65	52	56	41	30	34	68	60	1	42
22667	NM_001025575	chr1	141706868	141755276	-	Cfhr2	Unmarked	0.354	0.144	5.621	0.433	143	100	61	47	84	104	74	53	62	45	30	29	61	67	1	38
28251	NM_009888	chr1	141982431	142079988	-	Cfh	Unmarked	21.25	2.525	2.409	0.101	100	76	58	57	59	111	81	61	50	51	38	42	83	73	4	55
18597	NM_001081027	chr1	142142833	142506838	+	Kcnt2	H3K4me3-only	280.15	24.964	8.832	0.307	47	40	67	42	25	112	69	71	57	46	68	63	67	80	29	116
27290	NR_040604	chr1	142466752	142552979	-	4930590L20Rik	H3K4me3-only	35.771	7.846	3.212	0.208	51	69	56	52	56	107	76	82	53	54	47	51	68	90	26	61
16303	NM_145991	chr1	145454628	145549814	-	Cdc73	H3K4me3-only	291.129	69.185	11.777	0.525	45	17	74	21	17	34	62	47	65	61	160	125	30	49	114	78
15535	NM_020025	chr1	145487826	145497067	+	B3galt2	Unmarked	6.375	0.909	12.847	0.572	148	60	91	76	61	63	57	43	74	34	29	54	92	67	14	36
14065	NM_001038593	chr1	145586478	145596808	+	Glrx2	H3K4me3-only	166.461	19.779	15.791	0.738	55	42	56	47	41	65	63	56	61	47	120	89	43	71	78	65
14316	NM_001038592	chr1	145586697	145596808	+	Glrx2	H3K4me3-only	210.024	27.223	15.256	0.68	50	40	51	48	39	65	70	59	62	46	114	91	38	83	77	66
14443	NM_023505	chr1	145586744	145596808	+	Glrx2	H3K4me3-only	214.982	26.656	14.988	0.638	44	40	52	47	36	62	76	57	64	46	117	94	38	83	76	67
16688	NM_001038594	chr1	145587576	145596808	+	Glrx2	H3K4me3-only	74.73	12.536	11.241	0.396	56	56	63	38	55	133	81	62	50	49	59	65	52	92	20	68
11488	NM_013835	chr1	145597920	145624181	-	Trove2	H3K4me3-only	344.964	30.74	22.483	0.641	30	19	56	55	11	38	46	72	58	30	111	107	62	80	93	131
12229	NM_001159866	chr1	145624407	145654596	+	Uchl5	H3K4me3-only	389.589	37.033	20.341	0.604	25	14	68	35	9	29	69	62	69	60	136	107	39	67	98	112
12234	NM_019562	chr1	145624407	145654596	+	Uchl5	H3K4me3-only	389.589	37.033	20.341	0.604	25	14	68	35	9	29	69	62	69	60	136	107	39	67	98	112
2977	NM_009061	chr1	145846467	145851279	-	Rgs2	H3K4me3-only	86.064	10.671	67.983	2.551	53	36	70	42	35	55	80	58	56	59	80	95	57	78	60	85
12483	NM_153171	chr1	145985796	146024502	-	Rgs13	Unmarked	0.354	0.048	19.538	0.819	121	82	86	46	80	111	66	51	58	62	38	38	76	53	6	25
22443	NM_015811	chr1	146091798	146096234	-	Rgs1	Unmarked	0.708	0.155	5.888	0.329	106	67	73	52	61	98	89	59	66	76	31	33	66	65	13	44
27025	NM_022881	chr1	146599970	146622551	-	Rgs18	Unmarked	4.958	0.643	3.212	0.187	124	98	60	36	68	143	73	67	62	46	36	33	65	64	8	16
8610	NM_153539	chr1	148342795	148749602	+	Fam5c	H3K4me3-only	13.813	4.377	32.653	1.478	85	61	55	56	54	100	81	79	57	46	44	44	61	106	11	59
8711	NM_001145807	chr1	148344816	148749602	+	Fam5c	H3K4me3-only	138.481	20.784	32.386	1.319	52	30	86	41	32	89	72	73	62	59	81	70	63	88	33	68
9811	NM_008869	chr1	151676751	151808414	-	Pla2g4a	H3K4me3-only	26.563	3.788	28.103	1.002	68	43	78	77	45	98	55	80	55	44	45	52	99	93	17	50
7098	NR_015466	chr1	151923790	151946896	-	7530420F21Rik	H3K4me3-only	83.939	9.974	39.88	1.387	55	34	79	44	35	78	72	73	52	58	68	77	70	88	36	80
7084	NM_011198	chr1	151947253	151955142	+	Ptgs2	H3K4me3-only	92.085	8.471	39.88	1.387	69	31	86	53	38	67	74	50	64	45	80	85	67	87	34	69
17018	NM_024458	chr1	152166546	152181036	+	Pdc	Unmarked	2.833	0.673	10.706	0.492	120	77	81	48	67	115	75	63	69	65	35	26	69	63	5	21
17073	NM_001159730	chr1	152166546	152181036	+	Pdc	Unmarked	2.833	0.673	10.706	0.492	120	77	81	48	67	115	75	63	69	65	35	26	69	63	5	21
16202	NR_040603	chr1	152167810	152193901	-	2310030A07Rik	Unmarked	0.354	0.059	11.777	0.763	67	98	58	46	90	132	90	63	47	70	32	34	66	74	3	29
29427	NM_001077237	chr1	152208440	152240185	-	BC003331	H3K4me3-only	392.777	44.802	0.803	0.026	29	24	73	47	24	47	58	64	59	49	89	109	61	73	86	107
29441	NM_145511	chr1	152208440	152240185	-	BC003331	H3K4me3-only	392.777	44.802	0.803	0.026	29	24	73	47	24	47	58	64	59	49	89	109	61	73	86	107
29156	NM_133780	chr1	152239967	152297065	+	Tpr	H3K4me3-only	344.609	42.729	1.338	0.043	65	35	70	62	40	47	60	59	59	52	84	79	68	72	61	86
12769	NM_001110146	chr1	152296541	152313295	-	Prg4	Unmarked	4.604	0.41	19.003	0.785	90	69	82	40	63	141	82	51	67	59	41	46	61	69	8	30
12773	NM_021400	chr1	152296541	152313295	-	Prg4	Unmarked	4.604	0.41	19.003	0.785	90	69	82	40	63	141	82	51	67	59	41	46	61	69	8	30
7556	NM_001024720	chr1	152409631	152840565	-	Hmcn1	H3K4me3-only	147.69	16.198	37.739	1.237	66	26	102	33	22	52	68	50	75	36	112	99	64	78	40	76
15381	NR_038011	chr1	152985163	152991225	+	C730036E19Rik	Unmarked	0.354	0.084	13.115	0.984	70	59	76	49	55	73	78	73	54	60	50	49	75	87	9	82
15817	NM_001039512	chr1	153191627	153211575	+	Ivns1abp	H3K4me3-only	204.357	26.488	12.312	0.374	32	19	83	30	16	26	52	67	79	56	141	107	37	60	107	87
15860	NM_001039511	chr1	153191627	153203928	+	Ivns1abp	H3K4me3-only	204.357	26.488	12.312	0.374	32	19	83	30	16	26	52	67	79	56	141	107	37	60	107	87
15961	NM_054102	chr1	153191627	153211575	+	Ivns1abp	H3K4me3-only	204.357	26.488	12.312	0.374	32	19	83	30	16	26	52	67	79	56	141	107	37	60	107	87
24511	NM_025819	chr1	153214828	153275565	-	Swt1	H3K4me3-only	373.297	38.018	4.55	0.137	39	21	62	58	22	45	65	67	63	55	119	85	57	78	76	87
23560	NM_026876	chr1	153275777	153305313	+	Trmt1l	H3K4me3-only	396.318	45.206	5.085	0.149	33	21	74	48	22	36	54	68	69	54	83	92	53	69	87	136
18108	NM_011277	chr1	153316535	153347953	-	Rnf2	H3K4me3-only	249.337	47.402	9.368	0.366	26	14	63	28	11	22	53	51	56	39	162	140	38	62	120	114
16260	NM_022018	chr1	153418502	153566477	+	Fam129a	H3K4me3-only	187.711	19.826	11.777	0.382	33	22	86	47	23	42	63	69	63	54	123	81	69	78	49	97
18114	NM_001039644	chr1	153602503	153669458	+	Edem3	H3K4me3-only	345.672	65.717	9.368	0.304	46	13	75	43	23	28	75	52	53	65	123	112	55	72	80	84
5136	NM_197990	chr1	153731653	153937450	-	1700025G04Rik	H3K4me3-only	285.108	54.203	51.121	2.243	14	8	70	80	8	25	36	48	53	26	124	124	97	58	96	132
14329	NM_025677	chr1	154217865	154233812	-	Tsen15	H3K4me3-only	166.815	23.787	15.256	0.725	46	41	60	51	43	81	58	60	49	49	99	82	60	71	62	87
3629	NM_177756	chr1	154246996	154357825	+	Colgalt2	Bivalent	146.627	38.016	62.363	3.42	91	32	80	59	26	43	53	65	71	46	74	83	73	66	67	70
1856	NM_016846	chr1	154364659	154472241	-	Rgl1	Bivalent	159.023	19.718	80.563	3.59	56	35	69	45	23	53	62	67	64	37	96	97	62	80	66	87
8211	NM_001081197	chr1	154597680	154604674	+	Apobec4	Unmarked	3.542	0.631	34.527	1.368	99	58	94	61	64	60	65	58	69	52	44	51	79	77	13	55
7446	NM_026369	chr1	154613671	154622710	+	Arpc5	H3K4me3-only	269.525	27.449	38.274	1.269	27	19	69	51	14	19	40	51	66	35	123	132	58	51	125	119
13658	NM_010877	chr1	154655019	154684120	+	Ncf2	H3K4me3-only	23.73	3.561	16.862	0.697	65	30	100	53	31	44	65	63	77	37	74	69	75	91	19	106
22374	NM_001160256	chr1	154684124	154749776	-	Smg7	H3K4me3-only	470.695	63.918	5.888	0.202	35	7	86	30	4	20	45	46	89	35	153	125	30	53	118	123
22459	NM_001005507	chr1	154684124	154749776	-	Smg7	H3K4me3-only	470.695	63.918	5.888	0.202	35	7	86	30	4	20	45	46	89	35	153	125	30	53	118	123
23378	NM_001160257	chr1	154684124	154725298	-	Smg7	Unmarked	1.063	0.276	5.353	0.228	132	96	60	43	87	128	72	54	58	56	39	23	54	62	5	30
715	NM_175460	chr1	154802230	154966391	+	Nmnat2	H3K4me3-only	90.668	12.312	99.031	2.973	76	39	102	40	34	47	60	49	82	52	112	75	66	51	47	67
8884	NM_008485	chr1	154969885	155033577	-	Lamc2	H3K4me3-only	104.835	11.498	31.85	1.094	51	34	80	41	37	55	98	52	72	82	94	69	45	71	45	73
22765	NM_010683	chr1	155066051	155179916	-	Lamc1	H3K4me3-only	240.837	31.217	5.621	0.198	7	16	46	45	12	25	55	67	39	35	103	128	57	83	101	180
29185	NR_033736	chr1	155251315	155261363	-	E330020D12Rik	H3K4me3-only	54.542	14.141	1.338	0.136	84	78	73	51	60	84	73	54	67	54	56	54	75	55	29	52
5770	NM_001033162	chr1	155272338	155299704	+	Shcbp1l	H3K4me3-only	89.606	8.811	47.107	1.544	48	32	78	40	22	38	62	59	59	51	115	94	69	61	64	107
25994	NM_007842	chr1	155302887	155334790	-	Dhx9	H3K4me3-only	349.568	62.3	4.015	0.171	53	32	59	37	36	51	71	51	47	56	121	109	45	70	82	79
7800	NM_028749	chr1	155350145	155396844	-	Npl	H3K4me3-only	41.438	7.878	36.668	1.584	63	37	83	54	39	70	56	72	54	49	69	70	80	81	35	87
1375	NM_026380	chr1	155500166	155544795	+	Rgs8	Bivalent	34.001	7.458	86.719	4.849	35	39	76	49	19	62	80	76	62	41	65	83	84	95	30	103
2495	NR_046171	chr1	155568369	155584959	-	C230024C17Rik	H3K27me3-only	3.188	0.699	73.069	3.473	50	51	81	61	24	67	82	71	63	45	56	68	106	81	13	80
1097	NM_011267	chr1	155587482	155592598	+	Rgs16	Bivalent	48.167	8.08	91.269	3.944	41	22	51	54	28	69	67	98	48	53	67	62	50	119	45	125
10078	NM_011882	chr1	155596555	155611351	+	Rnasel	H3K4me3-only	32.584	3.717	27.033	1.117	94	44	69	58	46	71	67	73	51	55	69	60	74	86	30	52
12423	NM_001243223	chr1	155626516	155691271	-	Rgsl1	Unmarked	0.708	0.112	19.806	0.897	55	66	87	49	50	87	89	67	80	75	70	33	72	64	12	43
9357	NM_178243	chr1	155696671	155698325	-	5830403L16Rik	Unmarked	2.125	0.505	29.977	1.988	66	69	84	40	46	78	87	57	69	57	64	58	78	65	12	69
10679	NM_001008426	chr1	155721474	155724001	+	Gm5531	Unmarked	1.063	0.233	24.892	1.577	76	70	87	53	57	59	74	62	76	48	66	52	77	75	15	52
8119	NM_178244	chr1	155738775	155740190	+	Teddm1	Unmarked	0	0	34.795	3.201	71	51	87	51	45	60	84	60	69	63	84	49	75	74	10	66
15231	NM_008131	chr1	155747074	155756844	+	Glul	H3K4me3-only	232.337	33.129	13.383	0.415	39	23	64	30	16	45	60	88	42	46	106	106	60	94	70	110
5109	NM_001204908	chr1	156048316	156052804	+	Zfp648	H3K27me3-only	3.188	0.649	51.389	3.118	65	32	141	33	33	32	78	35	111	54	143	65	61	60	12	44
10459	NR_040629	chr1	156088650	156104036	-	4930452N14Rik	Unmarked	4.25	0.505	25.694	1.145	112	61	77	44	38	58	80	70	75	49	66	51	70	78	17	53
1216	NM_009782	chr1	156239648	156573050	-	Cacna1e	H3K27me3-only	13.459	2.399	89.128	3.851	43	37	62	43	28	111	66	77	51	51	81	63	63	83	37	103
5252	NM_010500	chr1	156943496	156946766	-	Ier5	H3K4me3-only	114.398	12.546	50.318	1.594	55	42	72	47	35	41	64	67	55	47	80	95	71	77	60	91
7714	NM_008209	chr1	156975007	156993910	-	Mr1	Unmarked	11.334	1.701	37.203	1.658	111	59	68	52	56	92	75	64	57	56	52	40	66	80	11	60
6083	NM_021433	chr1	157005832	157050647	+	Stx6	H3K4me3-only	269.879	30.784	45.233	1.449	49	35	77	43	30	34	68	52	74	53	126	91	51	62	73	81
13231	NM_011273	chr1	157122786	157264574	-	Xpr1	H3K4me3-only	187.003	19.751	17.665	0.763	47	45	82	39	40	55	60	43	65	40	114	101	61	58	65	84
16699	NM_026683	chr1	157405249	157419417	+	Acbd6	H3K4me3-only	266.337	31.647	10.974	0.382	47	27	66	62	24	50	60	57	71	53	94	81	59	61	79	108
16824	NM_028250	chr1	157405249	157534363	+	Acbd6	H3K4me3-only	266.337	31.647	10.974	0.382	47	27	66	62	24	50	60	57	71	53	94	81	59	61	79	108
16869	NM_001145781	chr1	157405249	157434924	+	Acbd6	H3K4me3-only	266.337	31.647	10.974	0.382	47	27	66	62	24	50	60	57	71	53	94	81	59	61	79	108
604	NM_010712	chr1	157548823	157589157	-	Lhx4	Bivalent	150.169	21.413	101.172	3.355	39	32	81	39	26	46	57	50	74	38	144	96	52	63	70	92
4758	NM_001024945	chr1	157625284	157660029	-	Qsox1	H3K4me3-only	284.046	32.399	53.53	2.12	35	20	55	45	22	29	61	81	54	42	101	101	45	102	81	125
4786	NM_023268	chr1	157625284	157660029	-	Qsox1	H3K4me3-only	284.046	32.399	53.53	2.12	35	20	55	45	22	29	61	81	54	42	101	101	45	102	81	125
15666	NM_001039184	chr1	157692093	157820385	-	Cep350	H3K4me3-only	325.484	35.697	12.58	0.437	26	17	66	31	9	28	59	74	60	46	118	113	45	79	94	134
25220	NM_001160018	chr1	157851728	157883610	-	Tor1aip1	H3K4me3-only	315.567	32.138	4.282	0.134	74	37	72	67	32	43	49	52	68	33	98	78	76	62	58	100
25282	NM_001160019	chr1	157851728	157881947	-	Tor1aip1	H3K4me3-only	74.73	9.686	4.282	0.17	84	69	68	59	71	137	66	56	59	53	42	32	66	72	10	55
25471	NM_144791	chr1	157851728	157883610	-	Tor1aip1	H3K4me3-only	315.567	32.138	4.282	0.134	74	37	72	67	32	43	49	52	68	33	98	78	76	62	58	100
25683	NM_172843	chr1	157882793	157915989	+	Tor1aip2	H3K4me3-only	289.713	37.552	4.015	0.135	89	18	63	45	21	46	41	75	62	40	81	94	43	79	92	110
24502	NM_001160180	chr1	157882856	157900866	+	Tor1aip2	H3K4me3-only	295.379	40.111	4.55	0.151	86	14	59	45	16	45	45	74	62	39	90	96	39	82	93	114
25428	NM_001160182	chr1	157883165	157900866	+	Tor1aip2	H3K4me3-only	341.776	44.3	4.282	0.134	21	13	61	35	13	37	57	85	54	59	108	110	42	83	105	116
25596	NM_022329	chr1	157887990	157900866	+	Tor1aip2	H3K4me3-only	239.066	25.25	4.015	0.151	78	48	80	52	63	88	72	54	68	63	73	50	49	79	29	53
25703	NM_001160181	chr1	157887990	157900866	+	Tor1aip2	H3K4me3-only	239.066	25.25	4.015	0.151	78	48	80	52	63	88	72	54	68	63	73	50	49	79	29	53
518	NM_177838	chr1	157923085	158135156	-	Fam163a	Bivalent	120.418	12.718	103.045	3.816	21	23	79	52	22	32	62	64	67	31	106	102	64	94	60	120
1444	NM_001134741	chr1	158185425	158233479	-	Tdrd5	Bivalent	114.398	14.828	85.916	3.828	26	25	79	44	25	37	45	54	65	39	132	114	58	60	94	102
1534	NM_001277730	chr1	158185425	158233737	-	Tdrd5	Bivalent	106.606	14.477	84.578	4.088	31	35	68	41	29	48	35	80	51	45	120	98	64	63	91	100
1063	NM_130456	chr1	158240865	158258166	+	Nphs2	Bivalent	44.271	8.417	92.072	4.606	63	27	111	48	23	37	70	42	84	54	106	82	79	53	40	80
5701	NM_009230	chr1	158358238	158404459	-	Soat1	H3K4me3-only	144.148	18.684	47.642	1.72	43	40	72	37	38	83	68	65	61	53	89	79	50	78	53	90
17548	NM_009595	chr1	158488917	158579750	+	Abl2	H3K4me3-only	275.9	30.259	9.903	0.523	38	19	88	29	13	26	59	46	71	51	167	119	53	47	94	79
17557	NM_001136104	chr1	158488917	158579750	+	Abl2	H3K4me3-only	275.9	30.259	9.903	0.523	38	19	88	29	13	26	59	46	71	51	167	119	53	47	94	79
8194	NM_023141	chr1	158583747	158604470	-	Tor3a	H3K4me3-only	107.314	12.241	34.527	1.368	37	24	65	51	16	50	76	72	55	39	91	98	69	102	50	104
10871	NM_145413	chr1	158608701	158649041	-	Fam20b	H3K4me3-only	289.359	48.542	24.356	1.007	40	15	83	28	18	15	61	37	73	47	174	130	34	54	107	83
16690	NM_001159968	chr1	158734296	158869757	-	Ralgps2	H3K4me3-only	208.607	119	10.974	0.454	11	15	46	41	8	24	57	43	51	41	137	156	42	52	146	129
16701	NM_023884	chr1	158734296	158869757	-	Ralgps2	H3K4me3-only	208.607	119	10.974	0.454	11	15	46	41	8	24	57	43	51	41	137	156	42	52	146	129
16763	NM_001159965	chr1	158734296	158869757	-	Ralgps2	H3K4me3-only	208.607	119	10.974	0.454	11	15	46	41	8	24	57	43	51	41	137	156	42	52	146	129
16861	NM_001159967	chr1	158734296	158869757	-	Ralgps2	H3K4me3-only	208.607	119	10.974	0.454	11	15	46	41	8	24	57	43	51	41	137	156	42	52	146	129
16885	NR_027640	chr1	158734296	158869757	-	Ralgps2	H3K4me3-only	208.607	119	10.974	0.454	11	15	46	41	8	24	57	43	51	41	137	156	42	52	146	129
17450	NM_001159966	chr1	158734296	158869518	-	Ralgps2	H3K4me3-only	228.087	92.907	10.171	0.46	13	10	50	30	10	24	64	33	55	47	151	165	26	50	152	119
11920	NM_028333	chr1	158769153	158791209	+	Angptl1	Unmarked	5.313	0.947	21.144	0.972	78	51	74	53	50	111	62	91	55	43	35	52	74	109	14	47
15152	NM_028540	chr1	159029278	159038776	-	Tex35	Unmarked	2.479	1.414	13.65	0.763	69	44	93	56	46	49	73	56	60	51	91	64	86	80	10	71
12907	NM_177644	chr1	159065313	159342726	-	Rasal2	H3K4me3-only	241.899	49.277	18.468	0.823	31	28	74	30	17	44	42	62	64	32	111	124	50	62	104	124
12280	NR_027984	chr1	159342482	159350367	+	2810025M15Rik	H3K4me3-only	319.463	56.935	20.341	0.879	39	13	62	39	8	12	37	57	58	26	143	142	49	63	127	124
20541	NM_001033284	chr1	159388712	159418864	+	BC026585	H3K4me3-only	64.813	9.242	7.227	0.245	61	26	86	56	28	58	61	65	57	47	69	74	84	81	30	116
11869	NR_027641	chr1	159436926	159498555	+	Sec16b	Unmarked	1.063	0.505	21.412	1.327	126	63	73	56	57	99	81	45	57	58	53	46	77	62	8	38
11876	NM_033354	chr1	159436926	159498555	+	Sec16b	Unmarked	1.063	0.505	21.412	1.327	126	63	73	56	57	99	81	45	57	58	53	46	77	62	8	38
13745	NM_001159986	chr1	159456300	159498555	+	Sec16b	Unmarked	2.479	0.393	16.594	1.075	58	38	86	44	47	72	87	66	55	75	80	61	66	87	18	59
2983	NM_207583	chr1	160175399	160286391	-	Fam5b	Bivalent	82.876	13.13	67.983	3.029	74	35	78	49	27	41	63	62	62	41	94	93	72	76	56	76
6344	NM_001205204	chr1	160292434	160621917	+	Astn1	H3K4me3-only	27.625	5.252	43.895	2.407	100	29	101	44	16	50	54	58	92	18	69	75	66	82	29	116
6354	NM_007495	chr1	160292434	160621917	+	Astn1	H3K4me3-only	27.625	5.252	43.895	2.407	100	29	101	44	16	50	54	58	92	18	69	75	66	82	29	116
8756	NR_030441	chr1	160435755	160435864	+	Mir488	Unmarked	1.417	0.311	32.386	1.742	61	53	82	55	47	69	76	80	69	55	64	46	73	96	12	61
6834	NM_001085376	chr1	160641861	160887569	-	Pappa2	Unmarked	1.771	0.505	41.218	2.733	79	35	109	52	33	48	74	59	98	51	98	48	65	79	14	57
23793	NM_011931	chr1	161162456	161277711	+	Rfwd2	H3K4me3-only	149.106	53.157	5.085	0.213	20	21	49	30	21	34	39	82	31	46	108	140	47	75	130	126
22111	NR_028518	chr1	161270437	161270555	+	Scarna3a	Unmarked	0.708	0.101	5.888	0.21	122	98	50	55	100	141	60	54	45	44	29	27	58	72	6	38
22254	NR_039543	chr1	161270488	161270554	+	Mir1843b	Unmarked	1.063	0.16	5.888	0.21	125	99	51	52	99	144	63	51	48	45	32	26	55	69	6	34
6974	NM_022312	chr1	161453899	161855053	+	Tnr	Unmarked	4.958	0.785	40.415	1.829	81	24	104	53	38	76	63	66	75	47	62	65	67	96	20	62
5172	NM_001162896	chr1	161974510	162008717	+	4930523C07Rik	H3K4me3-only	53.834	10.235	50.854	2.5	57	22	90	60	27	61	63	52	73	49	99	71	73	71	40	91
5175	NR_028111	chr1	161974510	162002913	+	4930523C07Rik	H3K4me3-only	53.834	10.235	50.854	2.5	57	22	90	60	27	61	63	52	73	49	99	71	73	71	40	91
6195	NR_038031	chr1	162004865	162008116	-	4930562F07Rik	Unmarked	0.708	0.144	44.698	2.16	69	59	72	46	44	77	88	76	59	67	72	45	73	82	11	59
6277	NR_038030	chr1	162004865	162008049	-	4930562F07Rik	Unmarked	0.708	0.155	44.43	2.184	69	58	80	46	45	63	90	69	65	69	82	46	74	77	10	56
6773	NM_177839	chr1	162015162	162083706	-	Tnn	Unmarked	0.708	0.155	41.486	2.414	66	57	95	37	51	80	66	71	71	56	77	49	66	75	15	67
25468	NM_025474	chr1	162125390	162131317	+	Mrps14	H3K4me3-only	317.692	32.355	4.282	0.165	66	60	82	41	58	45	72	49	69	51	84	78	56	68	44	76
28469	NM_009786	chr1	162132497	162143023	-	Cacybp	H3K4me3-only	382.86	51.991	2.409	0.079	30	17	52	35	16	56	65	73	51	54	115	114	37	83	102	99
8496	NM_001038621	chr1	162149304	162281702	-	Rabgap1l	H3K4me3-only	14.167	4.489	33.189	1.893	27	44	58	62	29	83	87	93	50	40	55	75	85	126	20	65
9631	NM_013862	chr1	162186702	162723069	-	Rabgap1l	H3K4me3-only	229.858	28.501	28.906	0.947	38	13	62	31	14	34	57	67	60	51	144	109	32	74	101	112
12759	NM_001146330	chr1	162506798	162507884	-	Gpr52	Unmarked	2.125	0.379	19.003	0.968	62	76	59	53	54	111	90	73	59	49	38	50	74	93	9	49
16456	NM_001024952	chr1	162836541	162905107	+	Rc3h1	H3K4me3-only	372.943	50.644	11.509	0.444	24	10	93	76	12	13	46	39	79	38	143	114	87	49	92	84
15498	NM_080844	chr1	162908736	162933145	+	Serpinc1	Unmarked	1.771	0.297	13.115	0.594	85	69	86	40	60	79	91	48	65	69	66	50	70	60	8	53
19077	NM_173424	chr1	162947886	162964390	-	Zbtb37	H3K4me3-only	310.963	46.67	8.297	0.275	66	34	51	51	35	68	63	66	43	48	58	84	59	82	61	130
23887	NR_002840	chr1	162965296	162968668	+	Gas5	H3K4me3-only	442.361	43.497	5.085	0.163	47	39	76	47	30	53	78	45	76	51	114	88	56	63	61	75
20719	NR_039577	chr1	162967483	162967574	+	Mir5117	H3K4me3-only	279.442	49.803	6.959	0.272	108	91	64	52	82	109	91	41	60	67	44	35	65	57	6	27
21280	NR_028543	chr1	162968222	162968287	+	Snord47	H3K4me3-only	237.295	25.063	6.424	0.321	101	85	67	57	74	99	100	47	75	70	29	28	61	66	6	34
28194	NM_172644	chr1	162970743	163000763	-	Dars2	H3K4me3-only	320.88	33.891	2.677	0.086	66	37	54	47	27	81	66	71	59	45	86	77	52	82	62	87
28058	NM_001159930	chr1	163001022	163016474	+	Cenpl	H3K4me3-only	367.631	34.946	2.677	0.092	75	34	78	45	24	77	53	68	73	49	88	74	60	63	64	74
28215	NM_027429	chr1	163001022	163016474	+	Cenpl	H3K4me3-only	367.631	34.946	2.677	0.092	75	34	78	45	24	77	53	68	73	49	88	74	60	63	64	74
20078	NM_001039482	chr1	163018508	163061610	-	Klhl20	H3K4me3-only	225.608	35.743	7.494	0.339	79	59	90	45	62	63	60	58	67	45	75	73	66	76	35	46
25218	NM_028664	chr1	163072842	163100638	+	Ankrd45	H3K4me3-only	80.751	9.595	4.282	0.127	90	53	66	46	46	102	60	64	62	48	74	55	58	68	39	68
24321	NM_001195189	chr1	163086973	163089445	-	4930469G21Rik	Unmarked	11.334	1.405	4.818	0.145	90	64	56	61	48	123	84	61	61	43	46	43	73	85	7	54
10733	NM_007453	chr1	163170242	163181297	-	Prdx6	H3K4me3-only	158.669	12.569	24.892	0.645	44	32	59	44	26	64	67	71	45	50	74	93	63	82	62	123
4875	NM_009452	chr1	163325568	163348337	+	Tnfsf4	H3K27me3-only	4.604	1.094	52.727	3.199	105	60	65	37	46	79	81	76	55	51	60	53	61	91	14	65
12928	NM_183391	chr1	163424787	163435421	+	Tnfsf18	Unmarked	1.063	0.233	18.468	1.12	67	63	69	52	69	103	83	73	51	73	40	43	64	90	15	44
7988	NM_010177	chr1	163710822	163718626	-	Fasl	Unmarked	4.958	1.285	35.598	2.03	58	36	88	60	23	68	73	70	72	47	87	56	88	84	14	75
7995	NM_001205243	chr1	163710822	163718626	-	Fasl	Unmarked	4.958	1.285	35.598	2.03	58	36	88	60	23	68	73	70	72	47	87	56	88	84	14	75
24823	NM_172645	chr1	163746242	163806792	-	Suco	H3K4me3-only	276.608	41.514	4.55	0.173	46	15	81	34	14	34	66	57	76	54	142	105	40	69	87	79
14397	NM_001204905	chr1	163872219	163899279	-	4930558K02Rik	H3K4me3-only	189.128	20.742	15.256	0.524	100	41	71	57	35	46	54	62	63	38	86	71	70	72	47	86
7913	NM_001204904	chr1	163872219	163909767	-	4930558K02Rik	Unmarked	1.063	0.276	36.133	1.746	109	80	92	43	68	73	66	65	63	54	48	44	84	65	2	43
14428	NM_026078	chr1	163899318	163903566	+	Pigc	H3K4me3-only	195.149	23.188	14.988	0.515	51	38	72	38	35	101	72	63	61	59	85	70	52	72	47	83
14446	NM_001039045	chr1	163899318	163903566	+	Pigc	H3K4me3-only	195.149	23.188	14.988	0.515	51	38	72	38	35	101	72	63	61	59	85	70	52	72	47	83
3102	NM_001038619	chr1	163917432	164408161	-	Dnm3	H3K4me3-only	74.376	8.157	66.913	2.936	40	30	89	40	28	48	92	51	70	74	128	83	60	67	47	52
3111	NM_172646	chr1	163920353	164408165	-	Dnm3	H3K4me3-only	73.314	8.041	66.913	2.936	41	30	88	41	29	48	92	51	70	74	127	82	59	68	47	52
4711	NR_040562	chr1	163935099	163946616	+	2810442N19Rik	Unmarked	7.083	0.878	54.065	2.301	77	46	80	48	45	87	78	62	64	52	54	68	65	87	26	60
7681	NR_002870	chr1	164147753	164155681	+	Dnm3os	Unmarked	8.854	1.683	37.203	1.894	79	41	76	61	35	81	64	66	55	43	73	60	87	81	19	78
7781	NR_029810	chr1	164147944	164148054	+	Mir199a-2	Unmarked	9.208	1.313	36.668	1.901	62	47	74	60	36	81	75	65	62	53	74	55	83	77	21	74
11963	NR_029796	chr1	164153498	164153608	+	Mir214	Unmarked	1.063	0.233	21.144	1.206	102	70	48	63	56	108	92	52	55	53	42	41	71	77	9	60
11067	NM_144877	chr1	164463802	164478476	-	Mettl13	H3K4me3-only	111.918	14.507	23.821	0.828	61	33	87	35	33	56	75	60	64	64	89	88	59	71	53	71
15325	NM_016796	chr1	164500958	164529209	+	Vamp4	H3K4me3-only	342.838	54.315	13.383	0.439	32	24	79	34	11	28	57	61	86	37	126	102	40	67	90	125
9274	NM_010865	chr1	164569280	164579825	+	Myoc	Unmarked	0.354	0.084	30.245	1.917	56	47	81	59	33	47	70	72	58	43	83	62	97	84	12	95
8809	NM_001177581	chr1	164577373	164588350	-	7420461P10Rik	Unmarked	1.771	0.505	32.118	2.035	64	49	98	42	43	71	89	64	69	68	63	58	76	79	8	58
17975	NM_001081290	chr1	164601915	164670687	-	Prrc2c	H3K4me3-only	325.484	66.304	9.635	0.331	45	25	60	41	20	63	57	69	55	54	100	95	51	67	87	110
11752	NM_144878	chr1	164724013	164742680	-	Fmo4	Unmarked	1.063	0.178	21.68	1.315	73	64	76	63	68	113	74	68	57	75	53	22	79	71	4	39
11502	NM_010231	chr1	164759691	164796679	-	Fmo1	Unmarked	0.708	0.202	22.483	1.425	99	68	72	58	66	105	71	65	54	61	37	37	78	73	9	46
11271	NM_018881	chr1	164805177	164828843	-	Fmo2	Unmarked	2.125	0.758	23.018	1.931	88	70	65	55	58	81	82	63	64	53	64	43	68	80	12	53
9755	NM_001178038	chr1	164846681	164867356	-	Fmo6	Unmarked	3.188	0.909	28.371	1.839	105	66	68	51	56	103	66	65	59	55	66	37	69	67	17	49
13178	NM_008030	chr1	164883930	164914622	-	Fmo3	Unmarked	0.354	0.072	17.933	0.93	123	75	86	50	68	95	76	38	79	55	74	31	63	53	3	30
13601	NM_030071	chr1	164954432	165015801	-	Mroh9	Unmarked	1.063	0.303	16.862	1.045	103	90	69	43	83	124	69	59	48	51	34	42	70	70	4	40
393	NM_011127	chr1	165175249	165243781	-	Prrx1	Bivalent	24.084	3.816	106.793	3.955	82	41	71	34	35	111	57	90	63	34	65	56	48	106	26	80
395	NM_175686	chr1	165175249	165243781	-	Prrx1	Bivalent	24.084	3.816	106.793	3.955	82	41	71	34	35	111	57	90	63	34	65	56	48	106	26	80
398	NM_001025570	chr1	165185407	165243781	-	Prrx1	Bivalent	24.084	3.816	106.793	3.955	82	41	71	34	35	111	57	90	63	34	65	56	48	106	26	80
21393	NM_178883	chr1	165315039	165333772	-	Gorab	H3K4me3-only	309.192	51.869	6.424	0.333	69	43	83	44	43	61	74	53	68	55	97	68	59	72	34	76
12430	NM_001143956	chr1	165633123	165655363	-	Mettl11b	Unmarked	7.438	1.116	19.806	0.974	84	58	91	43	39	77	77	55	86	46	75	51	68	67	15	67
19037	NM_010629	chr1	165709809	165847231	+	Kifap3	H3K4me3-only	136.71	16.951	8.297	0.289	50	45	75	43	33	66	65	63	60	44	85	84	70	71	49	96
15426	NM_028776	chr1	165860194	165885257	+	Scyl3	H3K4me3-only	391.36	69.749	13.115	0.473	39	29	65	52	26	30	64	54	58	48	118	102	62	67	79	106
23068	NM_201364	chr1	165884138	165924912	-	BC055324	H3K4me3-only	360.547	42.841	5.353	0.196	52	40	73	45	33	52	77	65	81	63	101	75	44	72	69	57
22693	NM_027279	chr1	165925075	165927374	+	Mettl18	H3K4me3-only	366.922	41.853	5.621	0.205	59	42	65	67	35	56	58	69	68	53	55	66	72	67	64	103
7025	NM_011345	chr1	165978364	165987808	+	Sele	Unmarked	0.354	0.056	40.148	1.877	114	72	81	59	62	74	72	57	78	45	33	44	72	75	14	47
16574	NM_001164059	chr1	165992206	166010916	+	Sell	Unmarked	1.417	0.253	11.241	0.458	103	55	107	42	43	85	66	37	104	33	109	44	57	58	8	48
16668	NM_011346	chr1	165992206	166010916	+	Sell	Unmarked	1.417	0.253	11.241	0.458	103	55	107	42	43	85	66	37	104	33	109	44	57	58	8	48
6841	NM_011347	chr1	166045394	166080157	+	Selp	Unmarked	1.771	0.281	41.218	1.896	76	56	78	43	43	115	69	70	63	48	66	49	71	79	12	61
7522	NR_037987	chr1	166078706	166082348	-	Gm16548	H3K4me3-only	15.938	3.247	38.006	1.971	75	45	76	53	47	67	67	74	58	46	59	53	69	97	14	99
8232	NM_007976	chr1	166081989	166150405	+	F5	H3K4me3-only	18.771	4.461	34.527	1.931	52	36	95	48	36	52	83	52	79	51	113	65	65	83	17	72
16005	NM_054087	chr1	166179176	166195516	+	Slc19a2	H3K4me3-only	304.588	33.405	12.044	0.382	24	20	78	37	17	25	61	51	70	56	153	114	49	52	101	91
16115	NM_001276455	chr1	166179176	166195516	+	Slc19a2	H3K4me3-only	304.588	33.405	12.044	0.382	24	20	78	37	17	25	61	51	70	56	153	114	49	52	101	91
13513	NM_029115	chr1	166205728	166217978	+	Ccdc181	H3K4me3-only	80.043	10.375	17.13	0.626	74	55	84	42	50	86	59	61	69	44	82	64	62	71	35	61
26082	NM_001160208	chr1	166219930	166237615	-	Blzf1	H3K4me3-only	363.735	39.892	3.747	0.142	55	44	81	47	44	74	65	62	67	57	84	68	61	70	46	74
26177	NM_001160209	chr1	166219930	166237615	-	Blzf1	H3K4me3-only	363.735	39.892	3.747	0.142	55	44	81	47	44	74	65	62	67	57	84	68	61	70	46	74
26430	NM_025505	chr1	166219930	166237615	-	Blzf1	H3K4me3-only	363.735	39.892	3.747	0.142	55	44	81	47	44	74	65	62	67	57	84	68	61	70	46	74
26302	NM_138314	chr1	166237805	166367427	+	Nme7	H3K4me3-only	306.713	39.755	3.747	0.144	78	47	69	54	49	68	66	66	65	50	70	66	56	84	46	65
26414	NM_178071	chr1	166237805	166279566	+	Nme7	H3K4me3-only	306.713	39.755	3.747	0.144	78	47	69	54	49	68	66	66	65	50	70	66	56	84	46	65
24698	NM_009721	chr1	166367229	166388486	-	Atp1b1	H3K4me3-only	385.339	35.447	4.55	0.144	14	13	90	31	19	25	45	57	58	38	105	139	57	71	99	138
7259	NM_019759	chr1	166726862	166754397	+	Dpt	Unmarked	4.25	1.515	39.077	2.371	64	53	91	47	45	61	89	46	68	61	95	66	77	66	16	54
8424	NR_040303	chr1	166793251	166801569	+	Gm20743	Unmarked	2.125	0.379	33.456	1.564	89	61	78	40	52	89	71	68	62	49	68	50	66	81	11	64
8018	NM_008510	chr1	166861778	166865641	-	Xcl1	Unmarked	1.771	0.297	35.33	1.574	100	73	69	56	49	99	75	60	68	42	59	43	81	69	9	47
12684	NR_040480	chr1	166996747	167022061	-	4930568G15Rik	H3K4me3-only	21.959	4.817	19.003	0.918	71	53	84	32	38	70	83	67	72	63	102	53	59	72	21	59
4944	NM_032005	chr1	167067983	167090904	-	Tbx19	H3K27me3-only	3.188	1.819	52.192	3.167	64	36	98	56	39	68	71	60	76	49	75	63	76	85	18	65
6364	NM_145512	chr1	167104471	167124564	-	Sft2d2	H3K4me3-only	202.586	28.887	43.895	1.565	41	36	68	42	25	52	75	49	63	50	115	99	58	62	70	94
15551	NM_145513	chr1	167142416	167167089	-	Tiprl	H3K4me3-only	287.588	29.289	12.847	0.495	51	27	70	52	23	42	68	62	69	57	117	89	57	69	77	69
15153	NM_001081126	chr1	167225896	167251982	+	Gpr161	Unmarked	1.417	0.577	13.65	0.811	56	65	81	53	42	65	101	60	90	51	83	44	67	87	3	51
21859	NM_028759	chr1	167259631	167390594	-	Dcaf6	H3K4me3-only	465.382	57.704	6.156	0.214	16	24	61	28	20	40	66	74	64	51	131	99	28	85	88	124
26793	NM_027430	chr1	167391338	167411345	+	Mpc2	H3K4me3-only	276.608	31.551	3.479	0.126	56	32	82	45	25	41	51	68	67	37	81	95	67	74	66	112
16417	NM_173029	chr1	167415313	167506904	+	Adcy10	Unmarked	3.188	0.478	11.509	0.619	86	55	99	54	52	76	80	60	85	68	55	37	72	69	11	40
21938	NM_001083897	chr1	167522311	167564672	-	Mpzl1	H3K4me3-only	202.586	44.436	6.156	0.199	28	21	85	34	14	32	60	50	72	41	167	112	54	62	79	88
22029	NM_001001880	chr1	167522311	167564672	-	Mpzl1	H3K4me3-only	202.586	44.436	6.156	0.199	28	21	85	34	14	32	60	50	72	41	167	112	54	62	79	88
1815	NM_178593	chr1	167579075	167638225	-	Rcsd1	Bivalent	144.148	20.554	80.83	3.546	86	26	98	31	32	36	53	55	77	47	136	75	45	67	49	86
1831	NM_001038846	chr1	167579075	167638225	-	Rcsd1	Bivalent	144.148	20.554	80.83	3.546	86	26	98	31	32	36	53	55	77	47	136	75	45	67	49	86
6957	NM_011804	chr1	167693910	167705435	+	Creg1	H3K4me3-only	178.857	17.002	40.683	1.318	53	33	70	59	33	56	68	67	56	48	85	94	73	86	60	58
2623	NM_001113393	chr1	167718811	167801284	+	Cd247	H3K27me3-only	5.667	1.01	71.463	3.235	99	45	91	43	39	61	73	65	66	58	74	59	73	74	20	59
2624	NR_103716	chr1	167718811	167801284	+	Cd247	H3K27me3-only	5.667	1.01	71.463	3.235	99	45	91	43	39	61	73	65	66	58	74	59	73	74	20	59
2629	NM_001113394	chr1	167718811	167801284	+	Cd247	H3K27me3-only	5.667	1.01	71.463	3.235	99	45	91	43	39	61	73	65	66	58	74	59	73	74	20	59
2631	NM_001113391	chr1	167718811	167792243	+	Cd247	H3K27me3-only	5.667	1.01	71.463	3.235	99	45	91	43	39	61	73	65	66	58	74	59	73	74	20	59
2638	NM_031162	chr1	167718811	167797567	+	Cd247	H3K27me3-only	5.667	1.01	71.463	3.235	99	45	91	43	39	61	73	65	66	58	74	59	73	74	20	59
2640	NM_001113392	chr1	167718811	167801284	+	Cd247	H3K27me3-only	5.667	1.01	71.463	3.235	99	45	91	43	39	61	73	65	66	58	74	59	73	74	20	59
20144	NM_198932	chr1	167795284	167932765	-	Pou2f1	H3K4me3-only	248.983	47.335	7.494	0.271	57	34	81	44	31	35	31	33	79	18	165	114	49	42	100	86
20175	NM_011137	chr1	167795284	167932765	-	Pou2f1	H3K4me3-only	248.983	47.335	7.494	0.271	57	34	81	44	31	35	31	33	79	18	165	114	49	42	100	86
25162	NM_198934	chr1	167795284	167865079	-	Pou2f1	Unmarked	3.542	0.842	4.282	0.222	79	77	67	38	60	131	90	58	56	53	45	55	66	77	7	40
25380	NM_198933	chr1	167795284	167865079	-	Pou2f1	Unmarked	3.542	0.842	4.282	0.222	79	77	67	38	60	131	90	58	56	53	45	55	66	77	7	40
27532	NM_001033344	chr1	168028278	168058029	-	Dusp27	H3K4me3-only	59.147	6.747	2.944	0.092	70	46	81	46	48	85	76	71	58	61	72	47	67	88	9	74
27612	NM_001160049	chr1	168028278	168058029	-	Dusp27	H3K4me3-only	59.147	6.747	2.944	0.092	70	46	81	46	48	85	76	71	58	61	72	47	67	88	9	74
25580	NM_021610	chr1	168060590	168096641	+	Gpa33	H3K4me3-only	168.232	23.989	4.015	0.151	56	33	94	53	33	58	88	60	66	68	86	57	80	80	10	77
2856	NM_175296	chr1	168131515	168168875	-	Mael	Unmarked	22.667	2.811	69.054	2.401	63	29	74	53	27	44	56	58	59	43	94	89	69	70	61	110
1518	NM_001164528	chr1	168184269	168246963	+	Ildr2	Bivalent	42.146	9.245	85.113	5.644	53	27	58	41	25	54	77	62	45	61	94	99	56	76	71	100
5396	NM_030245	chr1	168309297	168323751	+	Tada1	H3K4me3-only	166.461	24.983	49.515	1.989	48	21	85	38	19	40	55	47	84	46	120	112	42	54	102	86
1405	NM_175170	chr1	168323741	168339959	-	Pogk	Bivalent	48.876	13.937	86.451	3.976	47	21	55	50	18	37	65	54	56	52	116	104	53	63	92	116
1407	NM_001142948	chr1	168323741	168339959	-	Pogk	Bivalent	48.876	13.937	86.451	3.976	47	21	55	50	18	37	65	54	56	52	116	104	53	63	92	116
17221	NM_001164306	chr1	168413743	168427719	-	Gm4846	Unmarked	0.354	0.168	10.438	1.353	82	78	68	43	63	135	77	72	66	48	44	35	60	86	4	38
14365	NM_001164312	chr1	168559101	168577824	-	Gm4847	Unmarked	0.708	0.101	15.256	0.68	105	61	64	51	42	66	95	66	66	48	65	52	68	94	7	49
11637	NM_172844	chr1	168592185	168611976	-	Fmo9	Unmarked	0.354	0.126	21.947	1.061	109	98	75	51	92	126	57	50	54	50	38	32	78	52	3	34
4476	NR_037988	chr1	168904153	168929861	-	Gm16701	Unmarked	5.667	0.49	55.671	1.936	67	52	71	60	54	95	77	72	58	68	53	43	71	83	21	54
2681	NM_001160261	chr1	168931547	169021433	+	Fam78b	H3K4me3-only	150.169	42.82	70.927	2.352	20	20	47	39	9	11	52	53	45	28	123	158	52	66	131	145
2691	NM_001160262	chr1	168931547	169021433	+	Fam78b	H3K4me3-only	150.169	42.82	70.927	2.352	20	20	47	39	9	11	52	53	45	28	123	158	52	66	131	145
2696	NM_175461	chr1	168931547	169021433	+	Fam78b	H3K4me3-only	150.169	42.82	70.927	2.352	20	20	47	39	9	11	52	53	45	28	123	158	52	66	131	145
14588	NM_030724	chr1	169156216	169215258	-	Uck2	H3K4me3-only	210.732	35.352	14.721	0.466	31	21	76	45	15	42	42	63	60	34	119	117	67	66	93	108
22222	NM_001039483	chr1	169238800	169264109	+	Tmco1	H3K4me3-only	405.881	50.326	5.888	0.221	48	25	59	53	22	48	53	70	58	54	92	92	57	67	91	110
10484	NM_019993	chr1	169280121	169298661	+	Aldh9a1	H3K4me3-only	132.106	12.99	25.694	1.127	62	37	70	46	40	40	55	75	46	55	94	74	66	78	51	110
7057	NM_025569	chr1	169302514	169323928	-	Mgst3	H3K4me3-only	272.358	26.781	40.148	1.379	63	31	78	61	47	47	52	66	52	46	82	81	71	89	48	85
4541	NM_001013382	chr1	169375805	169396911	-	Lrrc52	H3K27me3-only	3.542	0.722	55.136	3.276	62	36	73	75	33	61	70	73	57	48	53	55	94	93	17	99
1460	NM_009107	chr1	169528492	169569754	+	Rxrg	Bivalent	24.084	4.579	85.648	4.789	54	37	107	43	32	61	64	54	81	41	76	86	75	72	37	79
3486	NM_001159731	chr1	169548395	169569754	+	Rxrg	H3K27me3-only	10.979	1.739	63.433	3.35	85	41	66	56	41	68	96	48	57	60	86	70	65	84	26	50
292	NM_033652	chr1	169619688	169778864	+	Lmx1a	Bivalent	65.522	13.347	110.272	4.084	34	26	74	57	31	41	57	81	60	56	97	68	65	87	53	112
11374	NM_008783	chr1	170049494	170362389	-	Pbx1	H3K4me3-only	140.96	22.332	22.75	0.854	49	24	74	36	23	72	56	90	67	33	102	64	45	112	34	118
11432	NM_183355	chr1	170083999	170362389	-	Pbx1	H3K4me3-only	140.96	22.332	22.75	0.854	49	24	74	36	23	72	56	90	67	33	102	64	45	112	34	118
28250	NM_023284	chr1	171428064	171461595	-	Nuf2	H3K4me3-only	268.817	36.504	2.409	0.109	75	57	44	51	46	78	68	80	52	47	66	54	53	90	41	97
10498	NM_009063	chr1	171585631	171623657	+	Rgs5	Unmarked	8.146	1.291	25.694	1.495	79	47	90	42	36	54	90	63	76	66	57	58	67	76	20	78
5994	NM_009062	chr1	171671607	171677773	-	Rgs4	Unmarked	12.042	2.02	45.768	2.462	61	54	82	45	49	96	78	64	71	48	53	65	62	89	24	58
8925	NM_001033185	chr1	171859069	171864784	+	1700084C01Rik	Unmarked	13.104	2.874	31.583	1.801	73	35	81	53	35	81	55	66	61	37	80	56	72	85	18	111
14229	NM_010476	chr1	171879667	171899336	-	Hsd17b7	H3K4me3-only	148.752	18.444	15.524	0.515	58	43	74	50	31	65	74	66	77	56	83	69	60	72	53	68
14826	NR_040438	chr1	171899539	171902527	+	3110045C21Rik	H3K4me3-only	136.356	21.603	14.185	0.455	62	45	69	45	32	78	49	91	57	43	66	73	70	84	55	80
12629	NM_022563	chr1	171902437	172019075	-	Ddr2	Unmarked	1.771	0.337	19.271	0.886	100	88	72	41	64	94	85	63	70	55	46	37	67	68	6	43
11709	NM_133806	chr1	172072133	172105077	-	Uap1	H3K4me3-only	184.878	35.148	21.68	0.981	30	21	68	39	22	36	62	52	63	50	130	111	43	64	95	113
18852	NM_010633	chr1	172129386	172145524	-	Uhmk1	H3K4me3-only	104.835	27.18	8.565	0.4	65	45	54	40	41	49	57	65	35	47	97	98	63	71	69	103
15944	NM_001033499	chr1	172163001	172181718	+	Sh2d1b2	Unmarked	0	0	12.312	1.527	53	53	91	52	42	51	82	63	75	47	78	66	79	88	14	65
20739	NM_012009	chr1	172207454	172215793	+	Sh2d1b1	Unmarked	0.354	0.202	6.959	0.794	57	56	87	52	42	64	79	63	74	48	79	55	79	79	12	73
11227	NM_001198955	chr1	172228323	172236463	-	Gm7694	Unmarked	0.708	0.168	23.286	1.66	41	50	87	38	39	97	89	75	69	71	79	48	67	81	12	56
9397	NM_001039593	chr1	172238991	172242256	+	1700015E13Rik	Unmarked	1.771	0.842	29.709	2.066	112	62	81	52	62	70	80	58	74	67	58	28	58	71	9	57
2543	NM_001109985	chr1	172247626	172519980	-	Nos1ap	Bivalent	156.19	27.836	72.533	3.447	42	22	44	47	17	37	41	74	39	29	96	127	57	81	110	136
15116	NM_027528	chr1	172257344	172487241	-	Nos1ap	Unmarked	1.771	0.316	13.65	0.865	66	57	93	36	37	77	104	51	94	68	88	48	54	68	13	45
3406	NM_177068	chr1	172574662	172612920	+	Olfml2b	Bivalent	62.334	9.355	64.236	3.592	53	21	70	46	22	42	61	90	42	57	77	84	73	96	52	113
18884	NM_001081304	chr1	172634587	172797902	-	Atf6	H3K4me3-only	292.192	49.017	8.565	0.287	72	50	72	36	45	92	83	62	68	85	69	55	45	55	53	57
28557	NM_023173	chr1	172804318	172815671	-	Dusp12	H3K4me3-only	284.046	80.994	2.141	0.142	40	53	59	43	37	90	80	62	51	51	94	84	67	75	47	66
6582	NM_001029984	chr1	172837403	172843072	-	Fcrlb	Unmarked	2.125	0.866	42.556	2.528	52	63	83	41	43	65	89	74	74	55	96	46	70	87	4	57
11540	NM_001160215	chr1	172847724	172857714	-	Fcrla	Unmarked	1.063	0.303	22.215	1.377	89	46	81	58	44	72	85	60	73	56	62	48	68	87	11	59
11556	NM_145141	chr1	172847724	172857714	-	Fcrla	Unmarked	1.063	0.303	22.215	1.377	89	46	81	58	44	72	85	60	73	56	62	48	68	87	11	59
11623	NR_027666	chr1	172847724	172857714	-	Fcrla	Unmarked	1.063	0.303	22.215	1.377	89	46	81	58	44	72	85	60	73	56	62	48	68	87	11	59
12588	NM_010187	chr1	172890688	172906202	-	Fcgr2b	Unmarked	3.542	0.439	19.271	0.82	67	45	89	50	40	77	86	68	82	65	76	40	62	84	13	55
12665	NM_001077189	chr1	172890688	172906202	-	Fcgr2b	Unmarked	3.542	0.439	19.271	0.82	67	45	89	50	40	77	86	68	82	65	76	40	62	84	13	55
8169	NM_144559	chr1	172949056	172959892	+	Fcgr4	Unmarked	2.125	0.466	34.795	1.711	67	58	81	48	59	83	80	60	71	63	86	36	57	78	9	63
11252	NM_010188	chr1	172981299	172989534	-	Fcgr3	Unmarked	2.125	0.289	23.286	0.83	73	51	93	45	53	90	75	75	64	74	54	39	71	78	9	55
18421	NM_001081275	chr1	173051791	173057098	+	1700009P17Rik	Unmarked	3.896	0.855	9.1	0.382	52	53	74	50	41	83	93	63	63	64	63	49	72	80	9	90
14701	NM_025321	chr1	173059287	173080734	-	Sdhc	H3K4me3-only	263.504	24.239	14.453	0.463	111	24	73	54	33	45	61	45	61	41	105	79	58	74	46	89
14739	NM_008623	chr1	173080843	173091254	+	Mpz	H3K4me3-only	231.274	21.274	14.453	0.463	50	28	70	41	35	108	56	62	41	55	86	78	62	71	48	108
5479	NM_025557	chr1	173103394	173126399	-	Pcp4l1	H3K4me3-only	110.147	14.957	48.98	1.862	54	33	81	45	45	69	62	65	58	48	81	79	56	92	41	90
8187	NM_001243063	chr1	173144100	173148976	+	Nr1i3	Unmarked	6.729	1.01	34.527	1.669	85	50	92	49	47	70	64	56	67	44	72	56	76	74	11	86
8195	NM_009803	chr1	173144100	173148976	+	Nr1i3	Unmarked	6.729	1.01	34.527	1.669	85	50	92	49	47	70	64	56	67	44	72	56	76	74	11	86
8242	NM_001243062	chr1	173144100	173148976	+	Nr1i3	Unmarked	6.729	1.01	34.527	1.669	85	50	92	49	47	70	64	56	67	44	72	56	76	74	11	86
23395	NM_001037170	chr1	173147933	173152645	-	Tomm40l	H3K4me3-only	103.064	11.303	5.353	0.18	60	48	75	41	44	70	77	59	69	61	129	49	51	71	27	68
9256	NM_013474	chr1	173155184	173156510	+	Apoa2	Unmarked	0.354	0.053	30.245	1.198	82	54	71	49	44	55	85	68	63	54	80	53	66	89	14	72
10902	NM_010185	chr1	173159702	173164480	-	Fcer1g	Unmarked	4.958	0.673	24.356	1.069	49	41	80	29	38	70	81	85	55	61	96	63	58	101	18	74
28332	NM_153064	chr1	173164990	173177243	-	Ndufs2	H3K4me3-only	275.9	29.14	2.409	0.088	57	39	90	38	32	57	62	70	85	47	81	69	49	79	49	95
14802	NM_172845	chr1	173180552	173190053	+	Adamts4	Unmarked	9.917	1.885	14.185	0.595	106	31	114	46	18	57	61	50	95	28	90	61	77	70	9	86
19306	NM_020579	chr1	173200458	173207026	+	B4galt3	H3K4me3-only	298.213	26.574	8.03	0.263	59	32	80	56	36	50	68	53	79	54	107	64	53	70	50	88
18487	NM_008911	chr1	173207122	173211317	-	Ppox	H3K4me3-only	172.836	23.47	9.1	0.376	59	33	68	57	37	49	70	71	61	58	93	62	60	86	43	92
20451	NM_013919	chr1	173212083	173218092	-	Usp21	H3K4me3-only	255.358	24.274	7.227	0.226	45	32	66	40	28	61	79	51	59	49	140	87	50	77	50	85
28161	NM_025388	chr1	173218694	173225113	-	Ufc1	H3K4me3-only	284.046	36.817	2.677	0.109	100	64	73	43	59	92	61	60	66	61	72	46	54	56	39	53
28810	NM_011615	chr1	173259275	173272632	+	Dedd	H3K4me3-only	380.027	67.729	1.874	0.077	48	30	76	36	23	42	43	67	63	33	106	105	56	69	82	120
28939	NM_001128609	chr1	173259275	173272632	+	Dedd	H3K4me3-only	380.027	67.729	1.874	0.077	48	30	76	36	23	42	43	67	63	33	106	105	56	69	82	120
26217	NM_001242580	chr1	173272367	173275776	-	Nit1	H3K4me3-only	415.444	53.849	3.747	0.144	49	38	56	62	31	57	64	68	68	39	83	70	57	86	57	114
26311	NM_012049	chr1	173272367	173275776	-	Nit1	H3K4me3-only	415.444	53.849	3.747	0.144	49	38	56	62	31	57	64	68	68	39	83	70	57	86	57	114
26341	NM_011070	chr1	173275829	173288301	+	Pfdn2	H3K4me3-only	420.402	54.492	3.747	0.144	54	36	86	41	30	50	57	69	63	66	110	71	70	55	57	84
16692	NM_001033039	chr1	173288579	173290929	-	Klhdc9	H3K4me3-only	138.835	19.797	10.974	0.401	58	33	72	56	36	62	70	66	63	64	87	67	62	76	52	75
4789	NM_027893	chr1	173300303	173318418	+	Pvrl4	Unmarked	12.042	2.289	53.53	2.775	45	21	80	50	22	68	64	79	59	44	90	66	69	100	25	117
4798	NM_001122680	chr1	173300303	173318418	+	Pvrl4	Unmarked	12.042	2.289	53.53	2.775	45	21	80	50	22	68	64	79	59	44	90	66	69	100	25	117
8664	NM_001005508	chr1	173319090	173340370	+	Arhgap30	H3K4me3-only	29.396	3.645	32.653	1.001	56	32	77	52	25	45	83	65	63	55	98	66	74	86	23	99
22005	NM_009480	chr1	173341811	173348873	+	Usf1	H3K4me3-only	409.777	106.242	6.156	0.258	27	26	57	36	24	66	75	63	48	61	126	104	47	75	81	83
20484	NM_001164525	chr1	173349163	173350483	+	Tstd1	Unmarked	7.792	2.02	7.227	0.382	42	32	78	38	34	80	90	61	55	65	117	68	58	88	20	73
16602	NM_172647	chr1	173367691	173394724	+	F11r	H3K4me3-only	210.732	21.462	11.241	0.364	57	34	69	49	30	55	58	78	70	49	101	58	53	83	49	106
23059	NM_019484	chr1	173433608	173434881	+	Alyref2	H3K4me3-only	131.752	23.481	5.353	0.242	95	54	67	66	49	61	58	49	71	47	75	67	66	55	60	59
7984	NM_010584	chr1	173448254	173465425	-	Itln1	Unmarked	2.833	0.299	35.598	0.769	115	61	80	66	55	64	66	46	68	42	65	46	84	65	10	66
7710	NM_018729	chr1	173489323	173515447	+	Cd244	Unmarked	36.834	1.479	37.203	0.405	42	40	84	48	35	83	100	62	66	75	85	53	71	82	10	63
11675	NR_102726	chr1	173518743	173537465	-	Ly9	Unmarked	0.708	0.505	21.947	1.841	69	66	99	61	50	61	83	70	95	64	44	35	81	73	11	37
11766	NM_008534	chr1	173518743	173537541	-	Ly9	Unmarked	0.708	0.505	21.68	1.873	65	75	98	73	59	54	79	63	96	57	43	34	91	68	10	34
11790	NM_001277968	chr1	173518743	173537541	-	Ly9	Unmarked	0.708	0.505	21.68	1.873	65	75	98	73	59	54	79	63	96	57	43	34	91	68	10	34
10584	NM_144539	chr1	173562533	173583168	-	Slamf7	Unmarked	2.125	0.758	25.427	1.859	80	48	107	59	44	68	75	60	100	58	50	35	70	73	11	61
10572	NM_007649	chr1	173612185	173635388	+	Cd48	Unmarked	6.375	2.273	25.427	1.813	68	52	69	39	43	72	93	69	62	62	89	57	55	91	19	59
9548	NM_013730	chr1	173697262	173731315	+	Slamf1	Unmarked	1.771	0.505	29.174	1.77	87	45	90	44	41	84	82	65	73	59	66	48	64	84	8	59
27031	NM_001252472	chr1	173769827	173785228	+	Cd84	Unmarked	3.896	1.234	3.212	0.218	32	50	55	35	36	75	151	91	53	124	67	36	52	103	7	32
27403	NM_013489	chr1	173769827	173820849	+	Cd84	Unmarked	3.896	1.234	3.212	0.218	32	50	55	35	36	75	151	91	53	124	67	36	52	103	7	32
8869	NM_030710	chr1	173847667	173873999	+	Slamf6	Unmarked	1.771	0.459	31.85	1.714	61	40	74	44	31	89	89	84	57	69	62	51	69	95	15	69
9750	NM_033509	chr1	173934501	173957399	-	Vangl2	H3K4me3-only	304.588	29.95	28.371	0.93	65	24	85	31	10	33	52	53	74	36	149	93	56	56	66	116
10160	NM_010916	chr1	173982422	173987727	-	Nhlh1	Unmarked	2.479	0.471	26.765	1.363	37	44	77	38	42	54	93	77	60	60	88	56	57	109	5	102
24532	NM_021607	chr1	173996143	174012880	-	Ncstn	H3K4me3-only	502.216	62.271	4.55	0.158	44	23	77	48	32	66	42	88	55	49	79	71	61	91	55	118
24792	NM_009938	chr1	174012659	174052463	+	Copa	H3K4me3-only	448.382	51.144	4.55	0.162	95	31	96	59	39	49	46	50	91	37	104	64	56	67	49	66
23731	NM_023041	chr1	174056885	174066628	+	Pex19	H3K4me3-only	367.276	36.114	5.085	0.151	87	37	77	47	38	58	66	62	68	57	102	60	55	72	41	72
23907	NM_001159525	chr1	174056885	174066628	+	Pex19	H3K4me3-only	367.276	36.114	5.085	0.151	87	37	77	47	38	58	66	62	68	57	102	60	55	72	41	72
18869	NM_153555	chr1	174078145	174126524	+	Dcaf8	H3K4me3-only	293.254	33.45	8.565	0.305	78	26	66	48	25	56	57	59	61	44	93	81	54	71	63	117
7218	NM_011063	chr1	174126859	174136912	-	Pea15a	H3K4me3-only	62.334	8.888	39.345	1.781	46	41	90	29	28	41	52	73	67	46	115	72	65	66	42	126
6418	NM_009813	chr1	174140024	174150026	-	Casq1	Unmarked	3.188	0.478	43.627	1.752	27	40	84	50	45	51	68	74	73	45	101	54	55	102	20	110
10104	NM_013734	chr1	174153638	174188555	-	Atp1a4	Unmarked	0.708	0.202	27.033	1.573	54	44	84	74	50	62	55	73	61	33	40	57	90	101	13	108
3846	NM_178405	chr1	174201839	174228195	-	Atp1a2	Unmarked	4.25	0.551	60.489	2.614	45	36	83	43	28	57	74	84	69	46	99	60	64	105	18	88
9320	NM_080419	chr1	174242537	174249966	+	Igsf8	H3K4me3-only	165.398	22.46	29.977	1.096	23	27	73	40	22	32	63	64	47	45	125	105	71	76	61	125
2790	NM_008429	chr1	174251163	174259394	-	Kcnj9	H3K27me3-only	4.958	0.884	69.857	3.435	56	35	88	47	30	54	85	64	81	54	102	56	60	89	18	80
2024	NM_001039484	chr1	174271340	174304216	+	Kcnj10	Bivalent	70.48	13.399	78.422	3.388	33	37	47	39	28	60	49	107	33	42	69	74	62	105	54	160
15821	NM_026234	chr1	174306661	174314230	+	Pigm	H3K4me3-only	328.317	52.015	12.312	0.516	39	27	69	55	33	52	50	72	69	56	110	75	50	72	80	90
5557	NM_029612	chr1	174405490	174408540	+	Slamf9	Unmarked	0.708	0.126	48.445	2.512	60	65	87	44	45	58	98	55	77	58	93	59	73	75	9	43
3595	NM_001145800	chr1	174412343	174429008	+	Igsf9	H3K4me3-only	48.522	7.282	62.63	2.319	51	30	107	22	29	43	70	47	90	63	168	74	39	54	50	62
3735	NM_033608	chr1	174412447	174429008	+	Igsf9	H3K4me3-only	45.334	6.804	61.292	2.27	59	30	108	26	30	42	76	40	99	64	165	70	35	52	50	53
7251	NM_178598	chr1	174430376	174437506	+	Tagln2	H3K4me3-only	169.648	21.035	39.077	1.429	49	22	75	42	31	68	66	58	51	55	95	89	57	78	54	109
13866	NM_027972	chr1	174451260	174476001	+	Ccdc19	H3K4me3-only	53.48	6.631	16.327	0.695	74	45	79	34	34	53	98	59	86	65	116	56	39	81	29	51
4211	NR_040558	chr1	174471750	174480937	-	4933439K11Rik	H3K4me3-only	51.709	8.675	57.545	2.525	60	38	82	52	36	66	73	68	69	50	75	58	66	89	23	94
2742	NM_177723	chr1	174486068	174493848	+	Vsig8	H3K27me3-only	3.896	0.926	70.392	3.402	36	41	72	48	29	48	87	63	69	39	115	69	63	99	19	102
3513	NR_027644	chr1	174490036	174493848	+	Vsig8	H3K27me3-only	2.479	0.785	63.166	4.094	52	47	84	84	34	47	74	70	68	46	62	52	112	85	9	73
4561	NM_029084	chr1	174511507	174520699	-	Slamf8	H3K27me3-only	3.188	0.758	55.136	3.209	69	44	105	36	28	48	91	58	82	58	93	66	75	75	10	61
8407	NM_001164725	chr1	174526770	174532682	-	Fcrl6	Unmarked	0.708	0.144	33.724	1.963	83	54	91	57	53	63	75	62	76	51	77	42	73	84	4	54
7074	NM_026725	chr1	174560899	174563105	-	Dusp23	H3K4me3-only	170.357	13.88	40.148	1.286	43	27	79	52	30	46	69	47	68	50	108	85	60	69	55	111
12805	NM_007768	chr1	174628186	174630097	+	Crp	Unmarked	0.708	0.184	18.736	1.484	64	66	85	43	51	103	69	80	63	55	63	41	80	79	6	51
12081	NM_011318	chr1	174824091	174825185	-	Apcs	Unmarked	0	0	20.609	1.306	85	67	80	60	58	90	71	73	71	48	41	37	78	87	5	48
14981	NM_008763	chr1	174886898	174887948	+	Olfr16	Unmarked	1.063	0.202	13.918	0.827	70	64	50	64	52	127	82	78	40	65	41	37	86	84	9	50
16065	NM_146764	chr1	175060413	175061346	-	Olfr1408	Unmarked	0	0	12.044	0.928	33	79	56	44	50	99	79	94	46	52	53	49	82	92	12	79
16670	NM_146763	chr1	175113572	175114635	-	Olfr1406	Unmarked	0	0	11.241	0.572	52	85	56	49	67	124	81	85	47	59	36	40	76	89	9	44
19368	NM_001001809	chr1	175133488	175134430	+	Olfr218	Unmarked	1.771	0.459	8.03	0.498	83	81	55	48	61	103	78	75	52	47	47	44	70	87	10	58
13668	NM_146881	chr1	175145737	175146771	+	Olfr1404	Unmarked	1.063	0.303	16.594	1.314	75	83	56	58	69	103	81	73	52	56	42	39	76	84	10	42
16314	NM_010184	chr1	175151401	175157360	-	Fcer1a	Unmarked	0.708	0.168	11.777	0.763	88	82	75	46	65	103	81	57	61	46	48	53	77	75	4	38
14915	NM_146651	chr1	175200277	175201268	+	Olfr418-ps1	Unmarked	3.542	0.439	14.185	0.826	76	75	56	55	58	109	94	65	54	56	44	47	73	87	7	43
15114	NM_001205011	chr1	175204591	175207887	-	Mptx2	Unmarked	0.354	0.112	13.65	1.052	72	76	73	46	67	138	78	70	60	69	43	27	67	71	5	37
5783	NM_010045	chr1	175262016	175263634	-	Darc	Unmarked	1.417	0.449	47.107	2.442	51	51	55	50	34	85	68	109	47	42	44	45	74	119	11	114
2363	NM_053199	chr1	175264384	175297826	-	Cadm3	H3K4me3-only	83.23	13.186	74.675	2.917	30	21	79	38	20	37	67	51	64	49	131	91	54	68	58	141
28419	NM_001013779	chr1	175350734	175396167	+	Aim2	H3K4me3-only	143.794	19.527	2.409	0.098	123	81	53	33	70	124	84	60	54	60	55	32	42	74	9	45
28491	NM_001024721	chr1	175451441	175466088	-	BC094916	Unmarked	0.354	0.252	2.409	0.528	90	49	95	70	43	91	69	63	78	50	44	40	93	75	4	45
28561	NM_001177350	chr1	175522087	175529405	-	Pydc4	Unmarked	0	0	2.141	0.555	75	56	76	68	49	101	78	72	71	46	41	42	80	97	5	42
28585	NM_001177349	chr1	175522087	175529405	-	Pydc4	Unmarked	0	0	2.141	0.555	75	56	76	68	49	101	78	72	71	46	41	42	80	97	5	42
27981	NM_175026	chr1	175560989	175578059	+	Pyhin1	Unmarked	0.354	0.505	2.677	0.763	86	46	89	71	41	116	66	66	71	49	38	39	95	78	3	45
25768	NM_001162938	chr1	175603810	175628523	+	Pydc3	Unmarked	1.063	0.758	4.015	0.458	71	53	80	80	38	77	80	75	80	41	40	43	96	99	3	43
18904	NM_001204910	chr1	175653558	175671940	-	AI607873	Unmarked	0	0	8.565	0.582	88	54	87	55	58	90	71	68	61	63	50	41	77	80	7	49
28775	NM_008329	chr1	175677424	175697050	-	Ifi204	Unmarked	0.354	0.202	1.874	0.763	96	58	82	64	62	91	83	53	74	63	41	35	69	77	6	45
27370	NM_001170853	chr1	175787350	175810318	-	Mndal	Unmarked	1.063	0.606	3.212	0.572	77	59	74	52	44	86	85	72	62	50	41	52	79	92	6	68
27012	NM_001033450	chr1	175826485	175843053	-	Mnda	Unmarked	0	0	3.479	0.62	94	59	83	64	65	90	80	56	73	64	40	32	69	78	6	46
28814	NM_008328	chr1	175850533	175872591	-	Ifi203	Unmarked	0	0	1.874	0.763	81	62	78	51	51	87	79	74	60	51	40	49	81	91	3	61
28911	NM_001045481	chr1	175850533	175872623	-	Ifi203	Unmarked	0	0	1.874	0.763	75	60	76	53	46	88	81	76	62	49	41	48	81	93	3	67
25071	NM_011940	chr1	175892699	175912975	-	Ifi202b	Unmarked	0	0	4.282	0.23	73	66	70	51	68	125	87	72	73	68	37	26	46	92	11	34
25358	NM_008327	chr1	175892699	175912975	-	Ifi202b	Unmarked	0	0	4.282	0.23	73	66	70	51	68	125	87	72	73	68	37	26	46	92	11	34
18530	NM_172648	chr1	175942128	175961886	-	Ifi205	Unmarked	0.708	0.184	8.832	0.484	96	60	80	60	61	79	84	54	71	61	57	37	67	78	5	49
18759	NM_146717	chr1	175972063	175973067	+	Olfr433	Unmarked	1.063	0.303	8.565	0.698	44	62	67	66	52	73	78	81	55	53	59	45	87	97	8	72
20139	NM_146716	chr1	175980505	175981444	+	Olfr432	Unmarked	1.417	0.449	7.494	0.578	49	68	47	57	52	136	85	80	44	53	51	41	76	96	6	58
18081	NM_146718	chr1	175999430	176000384	+	Olfr430	Unmarked	0.354	0.078	9.368	0.495	73	84	55	55	69	100	91	66	59	53	36	39	66	89	5	59
23612	NM_146722	chr1	176019168	176020111	+	Olfr429	Unmarked	3.542	0.722	5.085	0.274	76	77	62	51	59	91	94	58	65	52	63	47	66	82	7	49
17159	NM_207158	chr1	176029590	176030538	+	Olfr427	Unmarked	1.417	0.404	10.438	0.488	96	100	45	38	77	142	71	81	44	46	27	35	62	82	9	44
17224	NM_001206926	chr1	176029590	176030541	+	Olfr426	Unmarked	1.417	0.404	10.438	0.488	96	100	45	38	77	142	71	81	44	46	27	35	62	82	9	44
15692	NM_001005520	chr1	176047221	176048145	-	Olfr231	Unmarked	1.063	0.505	12.58	0.747	40	73	50	50	58	101	75	91	41	50	45	41	74	102	7	101
18943	NM_146721	chr1	176066876	176067824	+	Olfr424	Unmarked	1.417	0.367	8.565	0.461	66	94	46	54	57	129	83	80	59	42	39	32	78	84	3	53
18084	NR_047667	chr1	176081611	176082661	+	Olfr421-ps1	Unmarked	0.354	0.101	9.368	0.486	61	90	43	59	63	87	98	84	45	65	39	35	85	89	4	52
18205	NM_146720	chr1	176081611	176082661	+	Olfr421-ps1	Unmarked	0.354	0.101	9.368	0.486	61	90	43	59	63	87	98	84	45	65	39	35	85	89	4	52
14646	NM_146305	chr1	176088852	176089898	+	Olfr420	Unmarked	1.063	0.276	14.721	0.875	58	81	53	52	45	120	85	87	58	52	37	38	83	85	9	56
23617	NM_011465	chr1	176102906	176178580	+	Spta1	Unmarked	4.25	1.212	5.085	0.302	174	58	92	46	51	99	58	59	96	34	33	26	49	77	5	42
16266	NM_146715	chr1	176180019	176181107	-	Olfr419	Unmarked	0.708	0.184	11.777	0.501	70	99	53	52	78	91	91	69	47	59	43	40	79	80	2	46
24992	NM_025470	chr1	176260648	176263008	+	Mptx1	Unmarked	0	0	4.55	0.419	76	78	75	41	67	135	83	66	64	66	40	32	64	72	4	36
22817	NM_207137	chr1	176299049	176299979	+	Olfr417	Unmarked	0	0	5.621	0.422	73	85	53	62	61	100	92	66	64	52	55	31	74	82	3	46
17234	NM_146714	chr1	176321176	176322186	+	Olfr248	Unmarked	0.708	0.184	10.438	0.465	82	89	53	61	63	114	86	65	58	52	41	34	83	73	5	40
16973	NM_146761	chr1	176360560	176361515	+	Olfr414	Unmarked	2.833	0.425	10.706	0.536	54	57	54	45	47	111	83	80	56	51	64	52	53	102	21	69
17799	NM_207694	chr1	176378755	176379733	+	Olfr220	Unmarked	0.354	0.05	9.635	0.55	70	71	64	69	61	75	84	70	56	47	48	50	87	97	5	45
11773	NM_019445	chr1	176431955	176752860	+	Fmn2	H3K4me3-only	147.69	20.056	21.68	0.835	59	34	87	31	16	47	70	75	75	43	107	89	61	83	51	71
4009	NM_011825	chr1	176763915	176851950	-	Grem2	H3K4me3-only	50.292	6.519	59.151	2.191	57	42	71	48	35	53	119	51	66	91	72	68	61	72	35	58
4366	NM_011880	chr1	176989206	177422676	-	Rgs7	H3K4me3-only	143.085	15.693	56.474	2.206	20	22	69	38	13	29	62	55	56	42	134	123	60	65	90	121
4369	NM_001199003	chr1	176989206	177422676	-	Rgs7	H3K4me3-only	143.085	15.693	56.474	2.206	20	22	69	38	13	29	62	55	56	42	134	123	60	65	90	121
21756	NM_010209	chr1	177531508	177555766	-	Fh1	H3K4me3-only	223.837	21.277	6.156	0.197	44	44	64	51	39	58	65	65	56	55	88	83	64	69	65	89
10680	NM_133809	chr1	177562323	177590984	+	Kmo	Unmarked	2.125	0.758	24.892	1.479	80	66	71	53	56	101	76	72	67	63	40	43	67	74	26	44
19119	NM_010098	chr1	177592558	177622721	-	Opn3	H3K4me3-only	208.253	28.28	8.297	0.329	27	11	69	40	22	22	57	54	55	49	171	121	43	72	100	86
17511	NM_021350	chr1	177612368	177618484	-	Chml	Unmarked	2.125	0.379	10.171	0.377	77	62	93	53	48	99	74	59	80	51	45	55	79	68	19	37
12076	NM_029453	chr1	177628723	177745864	+	Wdr64	Unmarked	3.542	0.631	20.877	0.805	109	63	97	67	54	71	57	54	87	39	53	37	86	63	9	53
23852	NM_012012	chr1	177810908	177841527	+	Exo1	H3K4me3-only	350.63	29.408	5.085	0.196	54	34	64	52	31	54	71	60	65	51	93	90	54	77	70	79
1467	NM_176916	chr1	177892436	178205443	-	Pld5	Bivalent	150.169	17.129	85.648	3.54	16	29	67	37	15	31	54	86	57	35	90	112	61	90	84	135
6460	NM_001195816	chr1	177892436	178144073	-	Pld5	H3K27me3-only	12.396	1.964	43.359	3.016	61	51	94	43	41	67	78	60	74	52	73	71	72	77	25	60
21530	NM_001099637	chr1	178663783	178737255	-	Cep170	Unmarked	1.417	0.202	6.424	0.269	111	80	86	48	70	98	91	38	82	67	53	31	62	51	4	27
25325	NR_029775	chr1	178702455	178702554	-	Mir350	Unmarked	0.354	0.072	4.282	0.235	108	104	84	55	107	120	50	47	71	38	21	29	65	63	4	33
25519	NM_029756	chr1	178744942	178950563	+	Sdccag8	H3K4me3-only	238.358	35.773	4.282	0.136	49	32	85	53	39	86	57	60	65	51	90	72	66	74	45	75
11135	NR_037996	chr1	178764754	178766264	-	Hmga2-ps1	H3K4me3-only	35.417	33.666	23.553	2.316	59	39	63	43	39	81	75	75	45	61	67	69	60	90	37	96
11361	NM_011785	chr1	178952245	179178898	-	Akt3	Unmarked	2.125	0.433	23.018	1.026	101	85	87	38	76	117	71	48	58	56	44	51	75	55	7	30
4728	NM_001012330	chr1	179374791	179380897	+	Zbtb18	Unmarked	4.604	0.729	53.798	2.131	91	70	83	38	62	113	83	55	70	62	61	44	59	68	10	30
4300	NM_013915	chr1	179375951	179380897	+	Zbtb18	Unmarked	2.479	0.353	57.01	2.139	84	73	80	27	69	162	72	59	64	55	47	40	48	71	7	41
7075	NR_037994	chr1	179571672	179573074	-	2310043L19Rik	Unmarked	10.979	2.087	40.148	1.413	41	22	79	47	21	71	69	102	56	52	56	49	70	118	9	137
13765	NM_027077	chr1	179659944	179683436	+	1700016C15Rik	Unmarked	6.729	1.279	16.594	0.728	58	48	59	53	45	117	95	64	44	60	59	60	71	95	10	61
26660	NM_007422	chr1	179693308	179726640	-	Adss	H3K4me3-only	252.879	30.047	3.479	0.11	29	22	58	36	14	47	78	52	55	52	143	109	47	70	81	106
26667	NM_001034899	chr1	179921565	179978422	+	Gm16432	Unmarked	6.021	2.862	3.479	0.268	64	78	83	30	75	78	82	47	60	54	63	69	56	73	18	69
21977	NM_024282	chr1	180117547	180182728	+	Desi2	H3K4me3-only	42.855	17.456	6.156	0.319	60	37	61	48	37	71	60	74	57	41	84	79	52	93	56	89
24100	NM_025511	chr1	180249283	180252824	+	Cox20	H3K4me3-only	281.213	27.651	4.818	0.127	70	34	78	45	29	38	60	47	68	52	129	90	60	50	71	78
26958	NM_016805	chr1	180258430	180267915	-	Hnrnpu	H3K4me3-only	423.944	38.998	3.479	0.106	93	18	85	43	16	25	39	46	72	33	118	121	59	50	102	79
15386	NM_026626	chr1	180336011	180413380	+	Efcab2	H3K4me3-only	302.109	34.46	13.115	0.499	63	34	56	38	22	44	61	80	51	52	111	85	54	78	71	99
550	NM_001161665	chr1	180459255	180862988	+	Kif26b	H3K4me3-only	184.524	21.048	102.51	2.983	38	29	67	45	22	51	52	54	73	27	109	109	46	72	91	114
23413	NM_027188	chr1	180885169	181448134	-	Smyd3	H3K4me3-only	228.087	24.09	5.353	0.204	82	33	79	46	32	39	85	56	68	64	107	76	59	75	44	54
23720	NM_008249	chr1	181458186	181476398	-	Tfb2m	H3K4me3-only	271.296	45.512	5.085	0.158	37	35	77	48	28	35	59	49	81	44	109	103	51	58	91	94
24214	NM_146105	chr1	181476659	181557604	+	Cnst	H3K4me3-only	339.651	44.025	4.818	0.137	24	24	51	39	23	49	49	86	39	50	87	110	51	85	99	133
18232	NM_178653	chr1	181598361	181617315	+	Sccpdh	H3K4me3-only	285.108	32.521	9.368	0.356	54	21	72	30	16	35	58	51	57	45	131	126	49	59	98	97
16611	NM_026375	chr1	181675034	181734146	-	Ahctf1	H3K4me3-only	106.252	10.448	11.241	0.368	85	40	83	37	37	59	65	58	70	59	77	82	53	60	64	70
14968	NM_001033285	chr1	181891219	182095733	+	Cdc42bpa	H3K4me3-only	141.315	20.15	13.918	0.509	82	75	66	40	61	146	80	49	62	59	65	45	58	55	21	35
8014	NM_023341	chr1	182095368	182126151	-	Adck3	H3K4me3-only	133.877	9.789	35.33	0.988	61	15	69	49	25	60	64	63	43	55	97	99	64	83	64	88
4072	NM_001163290	chr1	182095368	182123616	-	Adck3	Unmarked	5.313	0.842	58.615	2.533	79	57	104	40	53	76	81	41	81	68	101	48	67	50	12	41
11755	NM_001128605	chr1	182157134	182186431	-	Psen2	H3K4me3-only	187.003	23.187	21.68	0.835	46	27	77	38	22	33	65	52	54	48	119	110	66	63	70	109
12425	NM_011183	chr1	182157134	182176081	-	Psen2	Unmarked	1.063	0.217	19.806	1.228	34	53	71	51	40	89	84	75	60	60	56	55	74	86	21	90
1476	NR_003623	chr1	182257099	182260680	-	Gm5069	Bivalent	58.084	10.352	85.648	3.701	120	26	75	44	34	88	55	44	63	48	98	72	49	59	52	72
1480	NM_001081175	chr1	182260606	182353790	+	Itpkb	Bivalent	52.772	10.033	85.648	3.816	101	33	63	49	43	121	53	59	45	49	62	61	57	73	39	91
2084	NM_001081227	chr1	182362503	182413635	-	6330403A02Rik	H3K4me3-only	96.335	9.811	77.886	2.709	30	27	76	36	19	47	75	63	58	53	107	103	62	77	64	102
25810	NM_007415	chr1	182499105	182531385	+	Parp1	H3K4me3-only	320.171	33.816	4.015	0.113	57	31	74	42	30	50	62	49	62	43	115	107	54	67	77	79
21366	NM_175186	chr1	182571464	182611757	+	Lin9	H3K4me3-only	408.36	89.572	6.424	0.213	21	10	56	27	7	23	44	62	49	45	141	139	37	58	133	147
21648	NM_001103182	chr1	182571464	182620818	+	Lin9	H3K4me3-only	408.36	89.572	6.424	0.213	21	10	56	27	7	23	44	62	49	45	141	139	37	58	133	147
2724	NM_013729	chr1	182623178	182627165	-	Mixl1	H3K4me3-only	212.149	25.208	70.66	2.76	27	22	77	40	16	37	51	57	52	44	118	123	70	58	92	115
15940	NM_133225	chr1	182656173	182684335	+	Acbd3	H3K4me3-only	404.464	67.852	12.312	0.474	40	12	73	60	15	25	52	46	74	40	127	109	56	61	98	111
23536	NM_008210	chr1	182732698	182743734	-	H3f3a	H3K4me3-only	363.026	86.27	5.085	0.196	22	10	48	31	9	47	42	62	41	40	144	135	40	63	125	140
27072	NM_145943	chr1	182781281	182798245	+	Sde2	H3K4me3-only	370.464	40.63	3.212	0.086	44	36	67	47	33	48	60	64	57	56	92	88	60	66	73	108
19962	NM_177099	chr1	182823249	182829233	+	Lefty2	H3K4me3-only	61.272	8.32	7.494	0.271	37	41	101	49	33	48	76	70	77	59	73	61	81	78	21	94
20608	NM_133705	chr1	182834404	182838219	+	Pycr2	H3K4me3-only	185.94	21.209	6.959	0.261	47	49	68	41	31	56	79	69	60	58	93	85	67	72	56	68
12262	NM_010094	chr1	182865169	182868532	+	Lefty1	H3K4me3-only	53.48	7.262	20.341	0.753	27	36	84	57	22	42	83	72	66	58	94	65	89	83	22	99
2460	NM_144794	chr1	182872648	182905235	+	Tmem63a	H3K4me3-only	211.086	16.269	73.604	2.099	41	18	67	51	24	47	59	57	62	52	129	91	50	69	79	103
10576	NM_010145	chr1	182919686	182947626	-	Ephx1	H3K4me3-only	109.085	12.443	25.427	1.066	44	30	82	48	33	62	74	58	49	48	81	96	78	87	37	92
8794	NM_001033819	chr1	182981367	182990798	+	9130409I23Rik	Unmarked	1.417	0.224	32.118	1.454	84	63	81	63	50	54	84	44	73	58	77	54	84	57	20	53
25992	NM_026171	chr1	183023553	183074288	-	Nvl	H3K4me3-only	438.819	73.615	4.015	0.14	51	25	68	47	33	91	77	53	55	59	90	90	52	79	59	70
23562	NM_030131	chr1	183081061	183099125	+	Cnih4	H3K4me3-only	210.024	16.187	5.085	0.149	60	44	83	37	31	45	65	53	70	43	109	93	63	62	59	82
20901	NM_145514	chr1	183103356	183142109	-	Wdr26	H3K4me3-only	235.17	35.295	6.691	0.236	20	8	61	40	9	13	37	61	49	29	109	131	50	70	111	201
758	NM_001160211	chr1	183282758	183390772	+	Cnih3	Bivalent	112.273	9.147	97.96	3.104	27	21	82	37	16	34	50	62	59	36	115	117	65	71	80	127
764	NM_028408	chr1	183282758	183390772	+	Cnih3	Bivalent	112.273	9.147	97.96	3.104	27	21	82	37	16	34	50	62	59	36	115	117	65	71	80	127
767	NM_001160212	chr1	183282758	183390772	+	Cnih3	Bivalent	112.273	9.147	97.96	3.104	27	21	82	37	16	34	50	62	59	36	115	117	65	71	80	127
3248	NM_207280	chr1	183439763	183441582	-	Ccdc121	H3K27me3-only	6.021	1.321	65.574	3.596	99	42	86	65	35	44	80	54	81	43	62	61	78	83	19	67
23858	NM_133815	chr1	183745445	183772532	-	Lbr	H3K4me3-only	266.691	29.249	5.085	0.138	33	11	59	38	12	27	55	49	64	39	160	137	32	65	127	91
21348	NM_001083120	chr1	183834575	183950111	-	Enah	H3K4me3-only	137.065	65.145	6.424	0.241	14	11	47	30	3	7	30	55	56	27	162	164	29	50	169	145
21377	NM_010135	chr1	183834575	183950111	-	Enah	H3K4me3-only	137.065	65.145	6.424	0.241	14	11	47	30	3	7	30	55	56	27	162	164	29	50	169	145
21394	NM_008680	chr1	183834575	183950111	-	Enah	H3K4me3-only	137.065	65.145	6.424	0.241	14	11	47	30	3	7	30	55	56	27	162	164	29	50	169	145
21399	NM_001083121	chr1	183834575	183950111	-	Enah	H3K4me3-only	137.065	65.145	6.424	0.241	14	11	47	30	3	7	30	55	56	27	162	164	29	50	169	145
14850	NM_012058	chr1	184054867	184062546	+	Srp9	H3K4me3-only	214.982	25.544	14.185	0.539	23	18	65	55	23	56	67	74	55	49	75	98	61	96	70	114
8883	NM_001166728	chr1	184087308	184088229	-	Vmn1r1	Unmarked	1.417	0.367	31.85	1.566	82	70	89	44	41	66	74	58	84	49	108	37	77	55	7	58
23273	NM_007853	chr1	184205900	184212890	-	Degs1	H3K4me3-only	184.169	18.109	5.353	0.15	54	28	79	37	26	45	49	56	68	42	103	105	49	61	87	110
12420	NR_015458	chr1	184230964	184233420	+	1700047M11Rik	Unmarked	8.146	1.452	19.806	0.753	76	64	77	45	40	66	91	60	74	61	74	52	71	66	19	63
16199	NM_175127	chr1	184243232	184271737	-	Fbxo28	H3K4me3-only	210.024	29.948	11.777	0.382	44	37	53	43	30	70	58	67	59	39	86	98	44	78	85	108
11091	NM_173378	chr1	184339297	184392567	+	Trp53bp2	H3K4me3-only	322.296	31.691	23.821	0.781	24	16	56	22	7	43	55	72	47	47	141	127	39	72	110	121
1209	NM_009794	chr1	184397389	184447614	-	Capn2	Bivalent	155.127	17.013	89.395	3.227	32	30	66	37	20	38	53	69	50	43	103	111	63	69	85	130
6876	NM_001145806	chr1	184495137	184536657	+	Capn8	Unmarked	2.479	0.471	40.951	1.692	62	46	93	63	40	52	71	63	64	49	81	61	97	79	11	67
6909	NM_130890	chr1	184495137	184562483	+	Capn8	Unmarked	2.479	0.471	40.951	1.692	62	46	93	63	40	52	71	63	64	49	81	61	97	79	11	67
1598	NM_001033547	chr1	184677256	184679311	-	4922505E12Rik	H3K27me3-only	12.042	2.02	83.775	3.792	52	33	85	64	26	34	67	61	65	44	82	79	91	77	35	104
2120	NM_144796	chr1	184695036	184825785	+	Susd4	H3K4me3-only	89.606	14.196	77.351	2.902	51	40	83	36	22	40	83	49	69	46	122	87	68	68	36	99
2202	NM_016928	chr1	184884918	184906175	+	Tlr5	Bivalent	27.98	6.137	76.548	3.7	47	28	96	41	30	55	68	75	62	55	79	77	72	90	31	93
9558	NM_028516	chr1	185856910	185857877	-	1700056E22Rik	H3K4me3-only	155.836	26.143	29.174	1.321	36	20	61	45	19	42	65	63	56	46	94	107	52	80	83	130
10112	NM_022019	chr1	185858339	185899515	+	Dusp10	H3K4me3-only	94.564	17.978	27.033	1.243	49	33	100	43	31	55	88	46	86	75	92	73	59	57	46	66
14341	NR_040472	chr1	186351719	186381570	-	1700112H15Rik	Unmarked	4.604	1.313	15.256	1.176	55	56	78	44	46	91	75	70	61	48	83	55	71	86	11	69
8747	NR_040627	chr1	186536375	186542868	+	4930488B22Rik	Unmarked	3.542	0.777	32.386	1.592	78	58	69	82	47	64	71	61	69	41	55	43	94	80	12	75
485	NM_008250	chr1	186551023	186556372	-	Hlx	Bivalent	163.982	18.704	103.848	3.897	32	19	66	35	20	92	41	74	50	36	97	101	50	80	79	127
3281	NM_001081361	chr1	186610645	186635192	-	43891	H3K4me3-only	43.917	5.218	65.307	2.271	46	30	74	44	21	37	76	54	56	55	133	98	71	65	59	80
19643	NM_133684	chr1	186636946	186669726	-	43892	H3K4me3-only	245.087	25.886	7.762	0.235	46	22	79	42	25	41	80	53	58	65	94	104	60	71	68	91
23434	NR_035502	chr1	186646285	186646367	-	Mir1981	Unmarked	14.167	2.02	5.085	0.191	33	49	59	36	39	77	127	81	58	93	60	55	47	105	20	60
13967	NM_178692	chr1	186695804	186706915	-	C130074G19Rik	H3K4me3-only	260.671	26.548	16.059	0.673	38	31	76	49	29	42	72	45	67	50	100	101	61	64	70	104
2619	NM_145515	chr1	186720302	186823428	-	Mark1	Bivalent	114.752	27.27	71.73	4.447	16	20	41	33	6	25	47	52	54	24	119	158	34	62	147	161
14513	NM_001163754	chr1	187028046	187110625	+	Rab3gap2	H3K4me3-only	261.025	32.365	14.988	0.521	50	26	65	47	23	41	54	85	45	50	63	90	69	87	66	138
19992	NR_034044	chr1	187066804	187066917	+	Snora36b	Unmarked	0.708	0.144	7.494	0.562	77	66	86	51	65	61	77	59	60	56	62	61	79	78	14	47
20148	NR_035529	chr1	187066853	187066922	+	Mir664	Unmarked	0.354	0.072	7.494	0.578	79	67	86	51	63	60	77	60	63	57	66	58	78	76	15	43
27927	NM_198653	chr1	187110540	187153280	-	Iars2	H3K4me3-only	317.692	33.554	2.677	0.102	39	35	60	45	39	63	74	49	51	47	90	102	50	79	66	110
14667	NR_029580	chr1	187137197	187137264	+	Mir194-1	Unmarked	4.604	1.01	14.453	0.736	84	60	87	57	48	52	72	67	74	55	70	52	81	73	22	45
14425	NR_029908	chr1	187137459	187137570	+	Mir215	Unmarked	3.896	0.926	14.988	0.763	67	50	81	58	40	47	98	70	70	79	71	49	80	79	18	42
27372	NM_011794	chr1	187156037	187181648	+	Bpnt1	H3K4me3-only	163.982	22.268	3.212	0.117	98	55	73	61	56	74	67	44	58	56	59	69	75	57	43	54
25348	NM_029735	chr1	187186973	187252234	+	Eprs	H3K4me3-only	429.965	61.31	4.282	0.191	36	24	56	52	22	38	69	56	63	57	104	104	47	67	98	106
10263	NR_038006	chr1	187253235	187265698	-	9630028B13Rik	Unmarked	1.771	0.388	26.497	1.608	90	50	98	51	42	55	88	44	87	65	77	50	70	59	15	58
6169	NR_040305	chr1	187270994	187279447	-	Gm2061	H3K4me3-only	162.919	33.188	44.965	1.781	70	30	119	47	19	23	52	33	108	39	105	95	69	35	71	84
6677	NM_001033286	chr1	187278726	187292640	+	Slc30a10	H3K4me3-only	169.648	17.278	42.021	1.872	40	32	80	48	33	29	64	60	60	47	121	97	67	77	60	84
6228	NR_033600	chr1	187321184	187321893	+	5033404E19Rik	Unmarked	6.375	1.069	44.698	2.236	90	66	73	41	45	114	77	62	65	52	47	54	69	66	22	56
16467	NM_146106	chr1	187911610	187941189	-	Lyplal1	H3K4me3-only	182.044	24.721	11.509	0.497	64	56	59	59	49	54	69	70	37	56	52	79	89	75	44	87
4283	NM_009367	chr1	188447064	188529871	-	Tgfb2	H3K4me3-only	76.147	19.743	57.01	2.463	53	30	99	45	28	35	94	45	77	74	95	85	69	63	42	65
23822	NM_026041	chr1	188544964	188573237	-	Rrp15	H3K4me3-only	427.131	46.845	5.085	0.196	93	32	90	60	27	54	58	59	77	54	82	64	78	58	46	67
9153	NM_033077	chr1	188791294	188794506	+	D1Pas1	H3K4me3-only	112.981	18.953	30.78	1.202	65	24	83	66	22	43	49	53	81	37	100	80	69	63	66	98
20950	NM_028848	chr1	188872285	189039325	-	Spata17	H3K4me3-only	270.233	36.696	6.691	0.303	82	52	72	58	49	60	47	65	73	41	76	62	61	68	56	77
7692	NR_040554	chr1	188949016	188951731	+	1700007P06Rik	Unmarked	3.188	0.535	37.203	1.684	99	64	105	63	43	60	75	44	97	47	56	47	93	50	11	45
21076	NM_029067	chr1	188959171	189039325	-	Spata17	H3K4me3-only	270.233	36.696	6.691	0.303	82	52	72	58	49	60	47	65	73	41	76	62	61	68	56	77
20919	NM_026367	chr1	189039389	189175308	+	Gpatch2	H3K4me3-only	284.4	38.62	6.691	0.298	57	45	72	39	44	83	61	71	63	62	84	64	48	69	57	80
133	NM_001243792	chr1	189432884	190038763	+	Esrrg	Bivalent	34.001	8.08	117.231	5.865	48	23	60	44	25	71	68	71	56	57	96	81	47	83	66	103
4955	NM_011935	chr1	189821705	190038763	+	Esrrg	Bivalent	50.647	8.024	52.192	3.236	75	40	60	39	44	82	84	61	48	73	89	71	47	76	48	62
4835	NR_038007	chr1	189830454	189832869	-	9330162B11Rik	Unmarked	3.896	0.505	52.995	2.477	103	62	73	56	56	121	60	47	52	33	52	64	83	68	16	53
9171	NM_021408	chr1	190086716	190788918	+	Ush2a	Unmarked	1.417	0.449	30.512	2.352	60	62	62	45	50	89	96	67	48	69	65	59	71	82	18	56
19243	NM_172650	chr1	190794976	190831719	-	Kctd3	H3K4me3-only	270.587	59.352	8.297	0.503	43	33	70	50	28	38	68	54	50	56	113	107	74	62	75	78
1689	NM_001159850	chr1	191031808	191167232	-	Kcnk2	Bivalent	68.001	19.39	82.704	4.624	102	23	79	43	13	32	48	52	69	33	100	100	62	58	75	110
1850	NM_010607	chr1	191031808	191167583	-	Kcnk2	Bivalent	81.46	17.868	80.563	4.595	68	22	87	45	15	16	49	44	77	32	139	109	62	54	83	97
2092	NR_027627	chr1	191031808	191168071	-	Kcnk2	Bivalent	44.98	9.866	77.619	4.34	34	30	100	38	17	36	70	54	73	46	144	95	77	65	44	76
23549	NM_001081363	chr1	191464492	191511965	-	Cenpf	H3K4me3-only	276.608	26.294	5.085	0.158	46	26	82	44	33	62	47	68	55	42	94	99	64	79	67	91
1542	NM_008976	chr1	191552146	191700572	+	Ptpn14	H3K4me3-only	251.108	47.739	84.31	2.613	21	14	51	32	14	38	44	84	30	39	106	127	52	89	102	156
13094	NM_026796	chr1	191704370	191746167	-	Smyd2	H3K4me3-only	159.023	19.718	17.933	0.691	21	24	53	50	19	51	69	51	53	41	104	121	55	74	93	120
684	NM_008937	chr1	191945657	191994559	-	Prox1	Bivalent	152.648	27.205	99.566	3.944	59	25	70	29	17	43	56	83	62	40	78	98	46	90	74	129
12434	NM_178775	chr1	192596757	192735649	-	Rps6kc1	H3K4me3-only	237.649	28.238	19.806	0.734	25	35	98	62	36	24	65	54	94	53	125	68	65	67	52	76
16285	NM_001199020	chr1	192748986	192770370	+	Angel2	Unmarked	1.063	0.433	11.777	0.685	75	57	88	32	43	98	92	63	74	62	49	50	60	79	6	71
18049	NR_037579	chr1	192752383	192770370	+	Angel2	H3K4me3-only	265.629	39.866	9.368	0.356	67	37	73	52	39	32	45	50	66	33	116	106	57	63	87	76
18229	NR_037578	chr1	192752383	192770370	+	Angel2	H3K4me3-only	265.629	39.866	9.368	0.356	67	37	73	52	39	32	45	50	66	33	116	106	57	63	87	76
18233	NM_021421	chr1	192752383	192770370	+	Angel2	H3K4me3-only	265.629	39.866	9.368	0.356	67	37	73	52	39	32	45	50	66	33	116	106	57	63	87	76
881	NM_144879	chr1	192771524	192802877	-	Vash2	Bivalent	61.626	10.338	95.551	4.192	30	25	55	38	17	37	65	68	50	48	108	109	51	76	88	134
895	NR_027352	chr1	192771524	192803175	-	Vash2	Bivalent	53.126	10.1	95.284	4.313	41	32	62	53	29	42	58	67	55	39	94	96	63	83	69	116
17363	NM_001081259	chr1	192829710	192850069	-	Mfsd7b	H3K4me3-only	188.419	23.363	10.171	0.315	35	25	71	46	21	39	60	52	65	34	125	120	55	75	88	88
16264	NR_027298	chr1	192849229	192853660	+	A230020J21Rik	H3K4me3-only	180.274	28.561	11.777	0.41	42	36	77	69	35	47	74	51	61	54	71	86	86	70	49	91
15999	NM_029336	chr1	192860700	192866820	+	1700022P22Rik	Unmarked	2.833	0.505	12.044	0.731	65	69	74	47	61	83	87	73	58	65	61	46	70	88	8	44
14550	NM_026895	chr1	192869708	192886811	-	Tatdn3	H3K4me3-only	427.486	43.537	14.721	0.525	44	32	73	49	27	53	60	71	68	51	93	80	59	76	66	97
14632	NM_001163422	chr1	192869708	192886811	-	Tatdn3	H3K4me3-only	427.486	43.537	14.721	0.525	44	32	73	49	27	53	60	71	68	51	93	80	59	76	66	97
14648	NM_001163421	chr1	192869708	192886811	-	Tatdn3	H3K4me3-only	427.486	43.537	14.721	0.525	44	32	73	49	27	53	60	71	68	51	93	80	59	76	66	97
14767	NM_198654	chr1	192886899	192908437	+	Nsl1	H3K4me3-only	438.111	41.646	14.453	0.497	55	33	80	53	33	34	61	59	75	52	100	84	59	67	70	84
1233	NM_030060	chr1	192922292	192932822	+	Batf3	Bivalent	139.19	24.807	88.86	3.569	32	22	65	39	9	23	66	45	60	52	170	112	57	47	93	107
8153	NM_001109759	chr1	192986462	192988696	-	Fam71a	Unmarked	2.125	0.606	34.795	1.682	70	52	83	54	44	64	76	63	63	64	85	45	82	68	12	74
2816	NM_007498	chr1	192994175	193007212	-	Atf3	H3K4me3-only	246.504	25.105	69.589	1.946	43	21	71	50	25	47	59	60	58	44	77	100	59	79	73	133
3797	NM_025424	chr1	193130675	193141997	-	Nenf	Bivalent	92.439	17.574	60.757	3.536	79	16	119	29	22	20	57	36	111	40	156	82	30	59	58	85
1923	NM_025864	chr1	193149843	193176804	+	Tmem206	H3K4me3-only	134.231	15.311	79.76	2.499	39	30	68	42	30	56	67	70	53	50	84	99	56	87	68	100
19852	NM_144880	chr1	193175859	193220920	-	Ppp2r5a	H3K4me3-only	206.128	32.657	7.762	0.267	22	14	66	41	14	33	45	59	58	38	102	131	49	65	117	145
27622	NM_029766	chr1	193361243	193399413	-	Dtl	H3K4me3-only	474.945	52.089	2.944	0.086	27	20	68	42	21	55	52	69	63	52	93	109	45	70	105	108
27200	NM_178632	chr1	193399612	193445570	+	Ints7	H3K4me3-only	380.735	57.142	3.212	0.092	45	25	78	44	22	40	59	51	71	41	116	116	55	66	90	80
8106	NM_172266	chr1	193541902	193608134	+	Lpgat1	H3K4me3-only	115.106	29.843	35.062	1.266	39	12	62	25	13	32	59	42	49	52	140	139	37	50	119	129
7966	NM_001134829	chr1	193542273	193608134	+	Lpgat1	H3K4me3-only	171.419	122.18	35.598	1.269	7	7	47	24	7	18	30	67	45	24	148	149	27	73	141	185
26435	NM_010892	chr1	193645351	193656928	+	Nek2	H3K4me3-only	304.942	39.526	3.747	0.127	46	23	86	49	20	32	54	57	69	50	120	107	69	57	86	74
13405	NR_030669	chr1	193717950	193731406	-	1700034H15Rik	H3K4me3-only	191.253	27.271	17.397	0.661	40	30	59	70	14	38	62	53	48	53	77	112	96	46	93	108
12628	NM_009579	chr1	193730659	193737126	+	Slc30a1	H3K4me3-only	198.336	26.933	19.271	0.723	27	13	47	41	6	19	58	49	40	41	113	153	55	59	128	150
4911	NM_023727	chr1	193801253	193812163	+	Rd3	Unmarked	2.479	0.589	52.46	2.823	59	29	115	53	36	38	66	65	74	53	86	64	86	86	10	79
4926	NM_001177900	chr1	193801253	193812163	+	Rd3	Unmarked	2.479	0.589	52.46	2.823	59	29	115	53	36	38	66	65	74	53	86	64	86	86	10	79
3403	NM_011633	chr1	193821083	193916480	-	Traf5	H3K4me3-only	132.106	10.763	64.236	2.181	51	26	90	61	29	44	64	48	82	45	75	90	66	70	62	96
4435	NR_039566	chr1	193822434	193822515	-	Mir3473c	H3K27me3-only	1.417	0.577	56.207	3.816	71	63	73	115	55	49	67	50	66	42	45	43	129	68	11	52
15911	NM_144814	chr1	193924342	193961669	-	Rcor3	H3K4me3-only	191.607	42.028	12.312	0.481	16	28	47	33	18	33	40	69	54	26	131	122	37	73	114	158
15936	NR_033536	chr1	193960779	193974907	+	Gm10516	H3K4me3-only	202.586	26.259	12.312	0.418	52	18	72	50	12	25	71	51	54	45	106	108	73	71	65	126
2237	NM_001038607	chr1	194014753	194334040	+	Kcnh1	Bivalent	72.605	12.94	76.28	3.296	29	22	60	46	17	63	79	49	57	48	117	111	54	75	77	95
2238	NM_010600	chr1	194014753	194334040	+	Kcnh1	Bivalent	72.605	12.94	76.28	3.296	29	22	60	46	17	63	79	49	57	48	117	111	54	75	77	95
7577	NM_144881	chr1	194336709	194597413	-	Hhat	H3K4me3-only	139.544	33.162	37.739	1.237	44	32	70	48	33	52	68	58	52	51	119	94	65	76	58	79
6475	NR_040468	chr1	194667898	194668933	+	1700065J18Rik	H3K27me3-only	1.417	0.449	43.092	3.413	81	50	97	82	41	47	74	47	70	46	61	62	118	66	7	50
2204	NM_198247	chr1	194670681	194681946	-	Sertad4	Bivalent	78.626	24.913	76.28	3.508	39	20	65	36	16	52	45	50	52	43	160	132	53	48	116	72
1756	NM_001177794	chr1	194670681	194677941	-	Sertad4	H3K27me3-only	1.771	0.297	81.633	4.157	64	43	92	37	35	59	90	62	83	52	112	56	55	92	8	59
10734	NM_181546	chr1	194723500	194861892	-	Syt14	H3K4me3-only	136.356	18.517	24.892	0.807	30	18	85	38	29	24	87	42	77	59	139	107	35	81	71	77
19498	NM_145415	chr1	194930596	194956445	-	Diexf	H3K4me3-only	277.317	49.424	8.03	0.279	71	26	76	51	30	52	64	53	59	60	86	94	63	62	73	79
2276	NM_016851	chr1	194979305	194998229	+	Irf6	H3K4me3-only	93.147	9.159	75.745	2.7	39	20	72	55	19	39	72	59	63	54	133	82	65	76	55	96
16566	NM_001160360	chr1	194999662	195004026	+	A130010J15Rik	H3K4me3-only	295.379	22.166	11.241	0.327	57	29	79	52	43	60	70	54	47	65	85	91	70	73	55	69
15682	NM_181048	chr1	194999770	195004026	+	A130010J15Rik	H3K4me3-only	269.525	18.3	12.58	0.352	55	26	81	47	42	69	74	52	48	67	91	91	64	75	51	66
15708	NM_001160359	chr1	194999770	195004026	+	A130010J15Rik	H3K4me3-only	269.525	18.3	12.58	0.352	55	26	81	47	42	69	74	52	48	67	91	91	64	75	51	66
9241	NM_153137	chr1	195001697	195027740	-	Traf3ip3	Unmarked	3.188	0.909	30.245	1.597	72	39	88	53	40	56	92	54	76	55	88	59	64	92	10	61
8584	NM_001044751	chr1	195047834	195068554	-	Hsd11b1	Unmarked	3.542	1.122	32.921	1.771	50	51	72	42	39	63	90	83	60	56	64	55	66	104	10	94
9649	NM_008288	chr1	195047834	195090239	-	Hsd11b1	Unmarked	0.708	0.144	28.906	1.472	108	48	97	54	46	52	68	59	73	51	76	51	79	75	10	52
10469	NM_008059	chr1	195098353	195099382	-	G0s2	H3K4me3-only	73.668	12.358	25.694	1.094	39	13	83	59	17	49	62	76	56	45	67	74	81	98	30	150
7293	NM_008484	chr1	195128187	195170072	+	Lamb3	Unmarked	5.313	1.263	39.077	1.99	47	33	79	46	27	67	88	58	63	51	106	67	68	89	14	96
6997	NM_001277928	chr1	195128436	195170072	+	Lamb3	Unmarked	4.958	0.744	40.415	2.134	43	32	90	40	21	55	94	56	71	50	106	77	69	90	14	91
6443	NM_144817	chr1	195172539	195196476	-	Camk1g	Unmarked	2.125	0.866	43.359	2.748	58	34	88	56	48	89	60	71	62	44	95	50	68	101	9	66
22598	NR_029592	chr1	195333656	195333724	-	Mir205	Unmarked	18.417	2.626	5.621	0.182	64	52	80	61	46	59	79	65	56	49	61	61	90	89	7	80
19710	NR_040477	chr1	196038380	196048953	-	4930503O07Rik	Unmarked	0.354	0.059	7.762	0.418	74	62	81	58	54	69	70	71	62	47	52	56	85	87	14	57
10939	NM_008882	chr1	196446022	196643062	+	Plxna2	H3K4me3-only	159.023	19.718	24.089	0.799	43	31	86	51	26	34	68	44	83	40	115	99	58	67	68	86
4971	NM_001111059	chr1	196765014	196787486	+	Cd34	H3K4me3-only	65.168	10.932	51.924	2.598	84	51	93	52	47	38	72	45	82	44	89	71	66	70	32	63
4993	NM_133654	chr1	196765014	196787486	+	Cd34	H3K4me3-only	65.168	10.932	51.924	2.598	84	51	93	52	47	38	72	45	82	44	89	71	66	70	32	63
9485	NR_033564	chr1	196781952	196803153	-	Gm16897	H3K4me3-only	138.835	18.853	29.442	1.037	51	28	73	57	35	37	60	60	47	42	88	97	76	86	52	110
11824	NR_015566	chr1	196843592	196864102	+	A330023F24Rik	Unmarked	6.729	1.919	21.412	1.221	43	33	147	38	34	80	71	48	125	60	102	47	59	60	14	38
17505	NR_029809	chr1	196863233	196863314	+	Mir29b-2	Unmarked	1.063	0.178	10.171	0.592	66	72	81	51	54	99	93	67	70	68	63	39	80	73	4	19
15595	NR_029745	chr1	196863740	196863828	+	Mir29c	Unmarked	1.063	0.233	12.847	0.814	71	74	83	44	62	101	83	67	61	73	61	40	77	66	8	28
13588	NM_010778	chr1	196868093	196918442	-	Cd46	H3K4me3-only	72.251	9.811	16.862	0.718	55	32	100	43	44	64	81	49	62	59	78	84	69	83	25	71
20747	NM_013499	chr1	196929981	196957764	-	Cr1l	H3K4me3-only	143.085	15.693	6.959	0.258	83	51	65	56	54	96	70	58	54	49	70	59	63	82	27	62
9622	NM_007758	chr1	196963004	197002909	-	Cr2	Unmarked	19.125	2.727	28.906	1.421	70	50	61	57	42	96	85	59	52	57	69	58	73	80	21	69
9283	NM_172546	chr10	3134303	3227479	+	Cnksr3	H3K4me3-only	197.628	28.18	29.977	1.096	65	25	78	65	28	42	49	45	70	32	93	105	71	64	80	87
8886	NM_001039652	chr10	3308331	3557940	-	Oprm1	Unmarked	11.334	1.701	31.85	1.442	52	40	68	54	34	91	72	70	58	46	69	63	70	90	27	95
17417	NM_001033391	chr10	3323355	3434998	+	Ipcef1	Unmarked	3.188	1.01	10.171	0.518	70	94	82	50	79	93	72	62	72	46	41	40	75	73	5	45
13938	NM_001170802	chr10	3366075	3428987	+	Ipcef1	Unmarked	2.833	0.621	16.059	0.954	85	79	68	28	58	138	78	71	68	51	47	39	48	77	13	51
13954	NM_001170800	chr10	3366075	3460176	+	Ipcef1	Unmarked	2.833	0.621	16.059	0.954	85	79	68	28	58	138	78	71	68	51	47	39	48	77	13	51
13993	NM_001170801	chr10	3366075	3428987	+	Ipcef1	Unmarked	2.833	0.621	16.059	0.954	85	79	68	28	58	138	78	71	68	51	47	39	48	77	13	51
2506	NM_001161822	chr10	4424140	4520877	+	Rgs17	Bivalent	155.836	27.773	72.801	3.053	50	25	64	48	23	35	63	67	67	37	111	90	47	91	68	113
2521	NM_019958	chr10	4424140	4520877	+	Rgs17	Bivalent	155.836	27.773	72.801	3.053	50	25	64	48	23	35	63	67	67	37	111	90	47	91	68	113
27289	NM_175374	chr10	4522597	4534654	+	Mtrf1l	H3K4me3-only	266.337	33.024	3.212	0.131	21	16	92	32	21	52	61	55	82	43	131	106	37	78	77	95
23033	NM_025995	chr10	4541075	4547383	+	Fbxo5	H3K4me3-only	369.756	42.176	5.353	0.198	30	27	70	39	17	48	75	53	59	50	122	109	59	69	73	99
11332	NM_011702	chr10	4698926	4707323	-	Vip	Unmarked	0.708	0.101	23.018	0.887	109	66	82	44	64	121	57	65	59	40	38	51	68	80	11	44
8280	NM_026793	chr10	4739751	4752813	-	Myct1	Unmarked	1.063	0.253	34.259	1.526	139	83	65	64	72	97	75	37	66	40	52	41	74	61	7	26
16425	NM_153399	chr10	4795848	5009592	+	Syne1	H3K4me3-only	173.898	30.992	11.509	0.469	44	30	102	49	26	30	76	39	65	52	118	104	90	59	43	72
13537	NM_001079686	chr10	5151833	5326342	+	Syne1	H3K4me3-only	84.647	10.058	17.13	0.596	54	44	72	47	38	99	88	53	58	42	65	86	67	94	26	66
12424	NM_022027	chr10	5277477	5326342	+	Syne1	Unmarked	4.958	1.088	19.806	0.941	31	44	75	51	33	93	107	63	63	64	56	75	74	95	20	55
5874	NM_007956	chr10	5342779	5734495	-	Esr1	Unmarked	9.208	1.05	46.571	1.66	74	49	80	38	37	100	69	84	60	52	49	59	69	90	22	67
15904	NM_001195672	chr10	5785429	5836669	-	Ccdc170	Unmarked	3.542	0.777	12.312	0.638	73	65	60	54	64	108	81	71	45	70	45	38	69	82	12	62
25662	NM_024261	chr10	5891400	5913936	-	1700052N19Rik	H3K4me3-only	265.629	32.936	4.015	0.155	74	19	59	48	26	53	66	56	57	50	85	99	43	78	81	105
25739	NM_025343	chr10	5914188	5943372	+	Rmnd1	H3K4me3-only	248.983	28.4	4.015	0.147	58	28	66	50	27	74	51	55	50	46	104	96	68	59	74	93
26224	NM_001033466	chr10	5958432	5979467	+	Zbtb2	H3K4me3-only	271.296	35.165	3.747	0.124	40	12	78	47	15	16	30	45	51	21	141	152	71	57	116	107
27605	NM_031185	chr10	5987069	6080212	-	Akap12	H3K4me3-only	323.713	34.19	2.944	0.076	56	26	80	32	19	57	66	58	60	43	112	96	58	75	53	108
17120	NM_001170785	chr10	6179459	6373466	-	Mthfd1l	H3K4me3-only	285.463	31.308	10.706	0.377	60	32	69	59	38	48	62	63	43	44	78	88	80	87	44	104
16918	NM_172308	chr10	6190410	6373466	-	Mthfd1l	H3K4me3-only	285.463	31.308	10.706	0.377	60	32	69	59	38	48	62	63	43	44	78	88	80	87	44	104
16962	NM_001170786	chr10	6190410	6373466	-	Mthfd1l	H3K4me3-only	285.463	31.308	10.706	0.377	60	32	69	59	38	48	62	63	43	44	78	88	80	87	44	104
5071	NM_001159942	chr10	6379238	6606164	-	Plekhg1	H3K4me3-only	139.19	23.35	51.389	2.714	122	11	126	30	10	34	44	35	115	27	128	89	42	51	62	73
18777	NM_001033253	chr10	6379238	6473874	-	Plekhg1	H3K4me3-only	61.98	6.798	8.565	0.344	73	36	70	49	36	91	75	79	48	62	60	58	71	91	23	77
4905	NM_027391	chr10	6791663	6806262	-	Iyd	Unmarked	5.313	1.01	52.46	2.933	77	53	83	48	40	77	79	66	58	58	55	61	86	74	15	69
2003	NM_133485	chr10	6881565	6980391	-	Ppp1r14c	Bivalent	68.355	11.467	78.689	3.869	58	35	79	44	30	57	57	70	61	43	99	81	67	78	50	90
14415	NM_001204916	chr10	7078769	7090333	+	H60c	Unmarked	8.146	2.112	15.256	0.946	112	39	104	47	31	58	60	60	94	36	86	55	66	76	20	55
29544	NR_045946	chr10	7213347	7221452	+	B020014A21Rik	Unmarked	0.354	1.009	0.535	1.524	52	87	61	20	74	172	94	79	55	79	44	25	38	82	4	33
14544	NM_172784	chr10	7309597	7345275	+	Lrp11	H3K4me3-only	286.525	43.002	14.721	0.531	44	24	64	37	29	40	59	59	55	43	84	118	42	80	93	128
16122	NM_008786	chr10	7350033	7383382	-	Pcmt1	H3K4me3-only	261.025	28.627	12.044	0.419	46	37	77	55	34	47	61	50	64	42	92	103	71	66	71	83
16533	NR_030698	chr10	7383168	7384421	+	A630066F11Rik	H3K4me3-only	355.589	42.252	11.241	0.373	35	26	62	45	20	32	67	64	51	53	99	116	62	71	91	105
17920	NM_145706	chr10	7387301	7398684	+	Nup43	H3K4me3-only	325.838	46.462	9.635	0.348	72	42	61	40	36	105	87	66	53	59	63	74	55	88	37	61
25724	NR_033219	chr10	7398768	7400956	-	BC020402	H3K4me3-only	298.213	38.654	4.015	0.13	21	21	62	40	11	40	55	57	63	45	125	119	48	57	111	124
25616	NM_010690	chr10	7401006	7436259	+	Lats1	H3K4me3-only	298.213	38.654	4.015	0.132	32	16	57	45	10	19	47	61	57	38	133	124	50	64	116	130
18561	NM_011835	chr10	7445797	7482948	+	Katna1	H3K4me3-only	310.963	25.335	8.832	0.319	42	38	69	41	46	85	74	59	52	67	72	77	50	74	53	100
14892	NM_145418	chr10	7487744	7500715	-	Ginm1	H3K4me3-only	318.046	53.354	14.185	0.595	64	34	70	36	32	57	61	63	56	62	91	82	52	59	69	111
22893	NM_026141	chr10	7512691	7542361	+	Ppil4	H3K4me3-only	519.57	52.915	5.621	0.229	57	35	72	49	30	66	81	58	67	66	87	81	59	68	61	62
5228	NM_172785	chr10	7552267	7590195	+	Zc3h12d	Unmarked	15.229	1.974	50.586	2.404	40	28	77	52	30	79	82	71	58	55	89	76	69	100	30	63
8172	NR_039563	chr10	7556178	7556272	+	Mir5104	Unmarked	1.417	0.269	34.795	1.908	54	69	74	116	61	56	65	53	62	47	41	42	136	63	12	48
17307	NM_138667	chr10	7625445	7675921	-	Tab2	H3K4me3-only	251.816	55.235	10.438	0.425	6	10	60	23	4	12	36	51	60	29	173	156	29	53	149	148
7411	NM_177387	chr10	7924550	8238623	-	Ust	H3K4me3-only	255.712	27.008	38.542	1.11	51	24	87	39	18	32	49	43	81	35	138	101	51	50	81	119
26728	NM_175155	chr10	8442016	8605868	-	Sash1	H3K4me3-only	299.275	32.822	3.479	0.103	54	23	65	43	20	42	69	52	62	52	121	103	49	66	83	95
1424	NM_177271	chr10	9347056	9395006	-	Samd5	Bivalent	127.856	19.189	86.183	4.237	42	23	65	59	20	32	59	56	66	41	86	107	61	71	91	120
7971	NR_038036	chr10	9404519	9411707	+	Gm6150	Unmarked	2.479	1.01	35.598	2.256	62	48	86	46	30	77	80	67	71	48	78	62	79	82	14	69
6965	NM_001081344	chr10	9475344	9620838	-	Stxbp5	H3K4me3-only	136.002	48.486	40.415	2.058	22	19	64	42	8	29	49	56	63	25	125	140	55	69	114	119
9882	NM_001127353	chr10	10055500	10192112	-	Adgb	Unmarked	14.875	2.232	27.836	1.221	95	52	82	37	52	74	61	72	55	49	57	66	64	84	27	72
8700	NM_026405	chr10	10264836	10278005	-	Rab32	H3K4me3-only	100.585	13.659	32.386	1.885	67	38	81	62	40	39	58	65	62	51	83	79	79	75	53	67
10468	NR_033630	chr10	10325742	10336111	+	Gm5177	Unmarked	2.125	0.758	25.694	1.704	88	74	88	37	56	107	83	54	77	50	72	48	65	69	4	27
3837	NM_016976	chr10	10405856	10802129	-	Grm1	Bivalent	15.584	3.418	60.489	3.08	62	56	75	40	50	101	70	72	75	40	49	50	47	95	20	97
3845	NM_001114333	chr10	10405856	10802129	-	Grm1	Bivalent	15.584	3.418	60.489	3.08	62	56	75	40	50	101	70	72	75	40	49	50	47	95	20	97
15675	NR_046010	chr10	10470843	10477929	+	4930567K20Rik	Unmarked	1.417	0.269	12.58	0.703	85	76	83	49	75	99	73	64	61	61	40	39	71	76	5	42
14744	NM_172937	chr10	10869227	10929413	+	Shprh	H3K4me3-only	246.858	22.708	14.453	0.468	39	29	66	33	23	87	69	60	58	42	103	108	48	81	72	81
14752	NM_001077707	chr10	10869227	10935071	+	Shprh	H3K4me3-only	246.858	22.708	14.453	0.468	39	29	66	33	23	87	69	60	58	42	103	108	48	81	72	81
25606	NM_027968	chr10	11001127	11017767	+	Fbxo30	H3K4me3-only	271.65	48.414	4.015	0.166	31	5	70	40	7	19	48	36	63	44	167	138	45	43	127	116
27154	NM_001168297	chr10	11001384	11017767	+	Fbxo30	H3K4me3-only	283.692	67.417	3.212	0.127	41	13	71	37	10	30	48	39	66	45	169	122	44	39	115	110
15280	NM_010146	chr10	11063242	11177275	+	Epm2a	H3K4me3-only	127.856	26.045	13.383	0.681	30	25	55	39	26	55	68	55	47	52	99	125	46	73	101	103
11359	NM_011682	chr10	12101985	12581533	-	Utrn	Unmarked	2.125	0.379	23.018	1.094	69	65	78	58	55	76	96	53	69	66	45	52	77	73	12	55
19970	NR_038027	chr10	12636443	12642925	-	B230208H11Rik	H3K4me3-only	202.586	26.259	7.494	0.31	70	18	91	57	27	44	65	39	71	51	104	88	68	62	55	89
20024	NR_038028	chr10	12636443	12642925	-	B230208H11Rik	H3K4me3-only	202.586	26.259	7.494	0.31	70	18	91	57	27	44	65	39	71	51	104	88	68	62	55	89
4348	NM_029075	chr10	12659786	12684065	-	Stx11	H3K4me3-only	204.003	27.703	56.474	1.732	37	20	80	38	22	92	57	60	56	60	113	92	59	60	71	82
4350	NM_001163590	chr10	12659786	12684065	-	Stx11	H3K4me3-only	204.003	27.703	56.474	1.732	37	20	80	38	22	92	57	60	56	60	113	92	59	60	71	82
4371	NM_001163591	chr10	12659786	12684065	-	Stx11	H3K4me3-only	204.003	27.703	56.474	1.732	37	20	80	38	22	92	57	60	56	60	113	92	59	60	71	82
22933	NM_175102	chr10	12728255	12728989	+	Sf3b5	H3K4me3-only	347.797	38.144	5.621	0.195	65	26	69	72	27	45	61	59	67	42	65	90	72	80	69	90
24508	NM_009538	chr10	12810593	12851501	+	Plagl1	H3K4me3-only	58.793	9.863	4.55	0.162	30	36	53	49	23	39	75	57	52	43	114	110	63	75	77	103
17593	NM_029172	chr10	12869449	12897829	-	Zc2hc1b	Unmarked	0.708	0.119	9.903	0.495	90	63	73	49	63	100	85	63	60	63	48	42	62	85	7	46
22398	NM_181470	chr10	12898443	12912943	-	Ltv1	H3K4me3-only	257.129	28.2	5.888	0.227	81	21	70	57	31	64	68	56	57	61	72	69	60	74	48	110
14426	NM_001195065	chr10	12927522	13194202	-	Phactr2	H3K4me3-only	268.108	34.752	14.988	0.503	28	20	74	40	19	33	63	61	58	44	112	111	57	79	75	125
16242	NM_001195096	chr10	12927522	13043966	-	Phactr2	H3K4me3-only	112.273	15.246	11.777	0.48	54	30	68	46	33	76	55	49	55	36	90	100	57	71	68	111
16259	NM_001033257	chr10	12927522	13043966	-	Phactr2	H3K4me3-only	112.273	15.246	11.777	0.48	54	30	68	46	33	76	55	49	55	36	90	100	57	71	68	111
14706	NM_001195066	chr10	12927522	13108776	-	Phactr2	Unmarked	13.459	2.559	14.453	0.793	64	57	62	34	42	90	79	97	50	50	64	56	61	111	15	67
14227	NM_025799	chr10	13220833	13237081	+	Fuca2	H3K4me3-only	128.21	15.234	15.524	0.661	48	25	78	66	24	51	70	64	60	50	99	78	85	84	39	78
27477	NM_001164195	chr10	13243647	13272948	-	Pex3	H3K4me3-only	364.443	49.49	2.944	0.09	66	41	76	64	31	50	50	68	77	36	83	67	73	73	54	90
27553	NM_019961	chr10	13243750	13272948	-	Pex3	H3K4me3-only	364.443	49.49	2.944	0.09	66	41	76	64	31	50	50	68	77	36	83	67	73	73	54	90
28562	NM_025748	chr10	13272712	13283182	+	Adat2	H3K4me3-only	300.338	35.687	2.141	0.069	78	36	82	42	28	60	65	70	79	58	89	62	53	69	52	76
10710	NM_025446	chr10	13372514	13588636	-	Aig1	H3K4me3-only	141.315	26.866	24.892	1.145	43	34	49	51	27	33	86	45	45	60	101	107	62	63	78	115
10143	NM_010437	chr10	13686184	13871184	+	Hivep2	H3K4me3-only	307.067	58.378	27.033	1.042	62	18	67	34	19	32	55	66	57	36	114	105	43	86	77	128
14285	NM_001002268	chr10	14122390	14264842	-	Gpr126	H3K4me3-only	269.171	27.413	15.524	0.476	47	20	69	43	18	38	63	67	58	48	95	103	56	80	78	116
26413	NM_025418	chr10	14375138	14425295	-	Vta1	H3K4me3-only	363.026	47.055	3.747	0.142	74	31	96	51	37	56	44	59	87	42	93	65	54	67	54	89
26464	NR_045824	chr10	14425414	14478825	+	1700016L04Rik	H3K4me3-only	315.213	49.939	3.747	0.148	58	36	69	44	42	73	53	78	61	46	95	66	46	92	50	90
11193	NM_029722	chr10	14435431	14438020	-	Gje1	Unmarked	1.417	0.213	23.286	1.006	119	91	72	49	77	97	75	52	65	48	42	40	70	66	5	31
7786	NM_008703	chr10	14480094	14490362	+	Nmbr	H3K4me3-only	165.044	26.148	36.668	1.394	86	45	71	55	35	49	71	67	68	45	81	69	68	83	40	66
23799	NR_038020	chr10	16670899	16815588	-	Gm20125	Unmarked	6.729	3.839	5.085	0.372	59	81	72	45	57	112	79	71	67	57	50	38	74	69	11	57
22654	NM_010828	chr10	17443033	17445480	+	Cited2	H3K4me3-only	328.672	55.137	5.621	0.189	48	23	83	36	22	38	64	53	68	40	132	109	52	75	71	85
19898	NM_138628	chr10	17516024	17565469	+	Txlnb	H3K4me3-only	26.917	5.904	7.494	0.289	93	34	70	60	36	75	95	61	49	72	47	58	78	87	14	70
12569	NM_001033432	chr10	17620271	17667873	-	Heca	H3K4me3-only	106.606	18.999	19.538	1.211	44	14	64	41	12	36	49	49	54	43	139	134	52	53	118	97
17256	NM_028440	chr10	17731066	17743058	-	Abracl	H3K4me3-only	149.461	20.296	10.438	0.522	60	39	71	43	38	84	75	56	66	58	104	66	49	73	44	73
14252	NM_009048	chr10	17775745	17844961	+	Reps1	H3K4me3-only	297.859	44.703	15.524	0.547	24	19	63	33	17	17	44	60	54	39	145	136	44	64	121	119
14286	NM_001111065	chr10	17775745	17844961	+	Reps1	H3K4me3-only	297.859	44.703	15.524	0.547	24	19	63	33	17	17	44	60	54	39	145	136	44	64	121	119
13105	NM_001195036	chr10	17848827	17930696	-	Ect2l	Unmarked	10.979	1.361	17.933	0.609	83	40	74	52	37	76	89	62	67	53	67	60	62	95	17	65
26428	NM_144820	chr10	17933490	17954787	-	Ccdc28a	H3K4me3-only	337.172	26.709	3.747	0.121	60	42	72	55	29	69	67	57	65	43	95	76	76	68	44	81
20018	NM_173390	chr10	18127480	18253697	+	Nhsl1	H3K4me3-only	125.023	14.855	7.494	0.301	61	43	74	41	46	106	77	62	58	53	73	67	53	89	28	68
11288	NM_001163592	chr10	18189786	18253697	+	Nhsl1	H3K4me3-only	27.625	3.03	23.018	0.677	81	45	67	46	45	92	113	59	56	98	66	43	57	73	18	40
9528	NM_019487	chr10	18259928	18265882	-	Hebp2	H3K4me3-only	74.022	11.727	29.174	1.3	40	48	89	63	41	37	66	53	73	40	97	77	86	72	35	82
3585	NM_001033258	chr10	18307816	18463564	-	D10Bwg1379e	H3K4me3-only	90.668	12.312	62.63	2.261	37	51	73	40	46	50	70	57	64	47	106	85	53	75	53	92
22327	NM_177706	chr10	18499532	18506599	-	Gm4922	Unmarked	0.354	0.067	5.888	0.442	47	68	64	39	74	149	91	59	49	63	58	49	48	93	6	42
10624	NR_038035	chr10	18517104	18551736	-	4930444F02Rik	Unmarked	2.125	0.505	25.159	1.139	77	48	83	63	51	57	87	40	63	63	91	63	81	67	18	47
10646	NR_102728	chr10	18517104	18551736	-	4930444F02Rik	Unmarked	2.125	0.505	25.159	1.139	77	48	83	63	51	57	87	40	63	63	91	63	81	67	18	47
10674	NR_038034	chr10	18520891	18551736	-	4930444F02Rik	Unmarked	2.125	0.505	25.159	1.139	77	48	83	63	51	57	87	40	63	63	91	63	81	67	18	47
2502	NM_022032	chr10	18564876	18576878	+	Perp	H3K4me3-only	141.669	15.537	73.069	2.605	29	25	76	41	20	41	79	54	51	53	105	120	71	75	69	90
6051	NM_009397	chr10	18720716	18735216	-	Tnfaip3	H3K4me3-only	169.294	15.573	45.501	1.395	47	29	63	46	16	63	69	63	57	49	105	94	65	70	68	95
7120	NM_001166402	chr10	18720716	18731769	-	Tnfaip3	Unmarked	2.479	0.589	39.88	2.274	87	59	84	56	52	88	77	57	79	54	54	44	68	74	16	50
14250	NR_038021	chr10	18861554	18927753	+	Gm20139	Unmarked	0.354	0.063	15.524	0.671	82	73	54	46	58	171	72	74	46	51	33	35	69	80	6	49
15684	NR_038022	chr10	18887043	18927753	+	Gm20139	Unmarked	3.542	0.505	12.58	0.569	80	59	66	51	49	60	70	89	62	48	59	45	65	101	20	75
2422	NM_053008	chr10	19076344	19078410	+	Olig3	H3K4me3-only	36.48	6.935	73.872	2.772	87	47	91	49	30	70	58	64	71	40	72	72	86	66	34	62
5526	NM_010511	chr10	19311763	19330031	+	Ifngr1	H3K4me3-only	159.023	22.675	48.712	2.137	43	23	72	51	30	54	62	69	51	53	80	85	66	84	55	121
10540	NM_178258	chr10	19341833	19354487	+	Il22ra2	Unmarked	0.708	0.106	25.427	1.611	68	66	62	47	56	72	58	118	44	37	38	44	74	130	5	80
1789	NM_172786	chr10	19432392	19479859	+	Il20ra	Bivalent	78.626	7.474	81.098	3.003	61	35	69	53	33	55	80	62	61	52	87	76	63	88	40	84
483	NM_029529	chr10	19567722	19571265	-	Slc35d3	Bivalent	152.294	17.371	104.116	3.093	27	25	58	45	14	38	53	71	45	36	92	118	69	78	87	143
19172	NM_001161825	chr10	19579895	19627480	-	Pex7	H3K4me3-only	132.46	15.109	8.297	0.315	83	43	64	45	48	78	54	62	51	50	73	84	54	70	67	73
19199	NM_008822	chr10	19579895	19627480	-	Pex7	H3K4me3-only	132.46	15.109	8.297	0.315	83	43	64	45	48	78	54	62	51	50	73	84	54	70	67	73
5303	NM_008580	chr10	19654331	19862556	+	Map3k5	H3K4me3-only	238.004	35.72	50.051	1.641	10	9	84	29	8	22	51	33	68	38	154	158	46	45	129	115
9903	NM_008635	chr10	19868725	20001396	+	Map7	H3K4me3-only	257.129	56.4	27.568	1.173	29	10	65	48	10	10	33	53	67	41	172	135	46	45	145	90
9992	NM_001198635	chr10	19868725	20001396	+	Map7	H3K4me3-only	257.129	56.4	27.568	1.173	29	10	65	48	10	10	33	53	67	41	172	135	46	45	145	90
20849	NR_045350	chr10	19919052	19921660	-	4930405J17Rik	Unmarked	9.563	2.098	6.959	0.288	57	47	81	65	41	73	68	67	65	40	53	59	88	88	15	92
12479	NM_001101561	chr10	19928244	19928836	+	Gm6251	Unmarked	3.542	0.594	19.538	0.796	107	72	77	51	51	78	76	61	64	56	38	54	85	60	21	48
22546	NM_001025393	chr10	20032274	20062307	+	Bclaf1	H3K4me3-only	357.36	35.139	5.621	0.147	31	12	65	46	15	39	45	70	60	48	121	114	48	70	112	103
22697	NM_001025392	chr10	20032274	20062307	+	Bclaf1	H3K4me3-only	357.36	35.139	5.621	0.147	31	12	65	46	15	39	45	70	60	48	121	114	48	70	112	103
22895	NM_153787	chr10	20032274	20062307	+	Bclaf1	H3K4me3-only	357.36	35.139	5.621	0.147	31	12	65	46	15	39	45	70	60	48	121	114	48	70	112	103
23250	NM_027930	chr10	20067624	20081475	+	Mtfr2	H3K4me3-only	165.044	17.432	5.353	0.191	66	45	65	62	41	60	69	60	56	60	90	78	76	65	59	47
2697	NM_013875	chr10	20117809	20444874	-	Pde7b	H3K27me3-only	8.146	1.452	70.927	3.211	79	45	65	52	45	120	65	75	42	50	48	69	76	89	31	48
13377	NM_026203	chr10	20672352	20800235	+	Ahi1	H3K4me3-only	261.025	32.365	17.397	0.577	37	30	52	45	20	40	60	72	46	45	96	114	62	77	93	110
18063	NM_001177776	chr10	20760625	20800235	+	Ahi1	Unmarked	0	0	9.368	0.405	102	75	70	61	73	96	80	49	60	54	39	44	73	72	8	43
3131	NM_010848	chr10	20844735	20880790	-	Myb	H3K4me3-only	169.648	34.559	66.645	2.501	40	24	68	35	16	44	52	57	63	38	133	112	47	64	93	113
3137	NM_001198914	chr10	20844735	20880790	-	Myb	H3K4me3-only	169.648	34.559	66.645	2.501	40	24	68	35	16	44	52	57	63	38	133	112	47	64	93	113
20662	NM_001042593	chr10	21015784	21088695	+	Hbs1l	H3K4me3-only	275.9	35.762	6.959	0.213	62	48	71	40	40	63	62	56	65	55	81	88	53	56	75	84
20688	NM_019702	chr10	21015784	21088695	+	Hbs1l	H3K4me3-only	275.9	35.762	6.959	0.213	62	48	71	40	40	63	62	56	65	55	81	88	53	56	75	84
20785	NM_001145209	chr10	21015784	21031004	+	Hbs1l	H3K4me3-only	275.9	35.762	6.959	0.213	62	48	71	40	40	63	62	56	65	55	81	88	53	56	75	84
14702	NR_045352	chr10	21038893	21061861	-	4930455C13Rik	H3K4me3-only	24.438	3.03	14.453	0.597	72	58	79	55	41	85	67	59	61	40	69	66	91	68	21	67
9177	NM_178713	chr10	21097105	21116384	+	Aldh8a1	Unmarked	7.083	2.525	30.512	1.28	91	69	74	61	60	88	85	53	68	67	69	34	76	62	9	33
8450	NR_027968	chr10	21312950	21342181	+	1700020N01Rik	Unmarked	11.334	2.02	33.456	1.645	69	61	73	47	53	57	80	65	64	71	70	55	64	67	37	66
5730	NR_045843	chr10	21410650	21413784	+	Gm5420	H3K27me3-only	8.854	1.804	47.374	3.142	95	39	81	62	33	83	61	72	73	49	62	47	75	79	27	61
4636	NM_001161845	chr10	21601989	21719708	+	Sgk1	H3K4me3-only	53.126	5.411	54.601	1.899	60	51	65	45	33	69	67	83	56	44	64	67	72	88	35	100
27326	NM_001161847	chr10	21698477	21719708	+	Sgk1	H3K4me3-only	118.648	11.666	3.212	0.103	75	62	56	80	51	102	77	66	55	48	38	46	92	83	16	52
26998	NM_001161848	chr10	21705909	21719708	+	Sgk1	Unmarked	8.146	2.904	3.479	0.121	60	70	70	53	55	70	92	70	77	53	65	42	60	94	10	58
23521	NM_001161849	chr10	21712028	21719708	+	Sgk1	H3K4me3-only	83.585	11.919	5.085	0.177	79	59	75	44	42	84	76	63	68	48	86	56	69	73	21	56
26029	NM_001161850	chr10	21713695	21719708	+	Sgk1	H3K4me3-only	273.775	45.928	3.747	0.127	84	29	71	39	26	77	54	60	64	48	108	76	48	63	63	89
25838	NM_011361	chr10	21714471	21719708	+	Sgk1	H3K4me3-only	403.756	46.054	4.015	0.129	42	37	74	38	30	54	64	64	69	48	124	89	50	74	68	74
29669	NM_053264	chr10	21786114	21787885	-	4930444G20Rik	Unmarked	1.063	1.516	0	0	100	43	93	65	42	52	66	51	90	48	72	43	70	67	22	75
9515	NM_001254744	chr10	21832855	21869076	-	E030030I06Rik	H3K4me3-only	134.585	19.191	29.174	1.849	43	26	72	44	25	41	62	72	66	56	89	83	51	76	72	121
9542	NM_001254745	chr10	21864109	21869076	-	E030030I06Rik	H3K4me3-only	134.585	19.191	29.174	1.849	43	26	72	44	25	41	62	72	66	56	89	83	51	76	72	121
1304	NM_009016	chr10	21878414	22093945	+	Raet1a	H3K4me3-only	48.876	10.721	88.057	2.589	35	32	54	57	30	66	64	62	51	52	100	75	62	72	60	127
29080	NM_198193	chr10	21893326	21903720	+	Raet1e	Unmarked	3.542	5.053	1.606	0.763	83	35	110	47	28	65	76	44	99	53	120	51	64	60	17	47
29561	NM_009017	chr10	21893680	22093919	+	Raet1b	Unmarked	0	0	0.535	0.763	69	35	123	44	32	63	65	41	97	53	131	56	74	50	17	49
29532	NM_009018	chr10	21893707	22093945	+	Raet1c	Unmarked	0	0	0.535	0.763	70	37	119	47	33	62	67	40	95	52	130	56	75	51	18	47
12704	NM_001177775	chr10	21993279	22008654	+	H60b	H3K4me3-only	18.771	10.708	19.003	2.168	66	40	66	58	43	59	77	44	58	63	100	70	63	62	48	82
7447	NR_015465	chr10	22026525	22032748	+	C920009B18Rik	Unmarked	10.979	1.252	38.274	1.001	81	41	102	41	28	40	84	64	89	57	114	47	68	77	7	59
27434	NM_020030	chr10	22081699	22093945	+	Raet1d	Unmarked	1.417	4.037	3.212	0.916	85	36	110	47	30	66	77	43	99	54	117	50	63	60	17	45
29554	NR_028580	chr10	22122618	22127276	+	Gm10825	Unmarked	0	0	0.535	0	57	39	91	44	28	64	77	59	63	49	113	75	83	76	18	63
4843	NM_178934	chr10	22364816	22423686	+	Slc2a12	H3K4me3-only	100.939	20.562	52.995	2.561	71	34	70	56	40	65	81	43	63	57	80	81	57	73	50	78
12413	NM_011603	chr10	22423682	22451253	-	Tbpl1	H3K4me3-only	340.359	40.442	19.806	0.715	34	17	69	33	22	30	46	56	53	46	139	125	44	61	108	116
2245	NM_011545	chr10	22537078	22539934	-	Tcf21	H3K27me3-only	8.146	1.291	76.013	4.014	66	29	85	43	28	58	66	78	71	58	97	60	58	85	38	79
2849	NM_010167	chr10	22823973	23069709	-	Eya4	H3K4me3-only	172.482	25.887	69.322	2.534	42	24	70	43	23	43	54	67	67	47	93	89	46	74	79	138
18859	NM_011295	chr10	23504988	23507015	-	Rps12	H3K4me3-only	445.194	57.705	8.565	0.294	72	34	66	57	35	47	71	58	55	60	78	90	68	69	68	71
15578	NR_037680	chr10	23505152	23505257	-	Snora33	H3K4me3-only	229.503	23.373	12.847	0.452	106	68	71	46	63	103	84	45	62	53	69	53	60	71	13	32
15768	NR_037681	chr10	23505559	23505627	-	Snord100	H3K4me3-only	310.255	35.389	12.58	0.422	87	62	74	40	62	104	99	45	54	78	62	52	60	66	11	43
21503	NM_183116	chr10	23516791	23547774	+	Slc18b1	H3K4me3-only	185.232	27.8	6.424	0.269	66	47	72	53	43	77	66	63	57	47	64	77	72	77	43	75
20253	NM_011979	chr10	23571267	23589649	+	Vnn3	Unmarked	1.063	0.152	7.227	0.382	91	83	51	66	58	104	90	57	61	48	38	39	82	74	7	50
12011	NM_011704	chr10	23614493	23625149	+	Vnn1	Unmarked	15.229	1.974	20.877	0.902	69	49	75	48	49	90	79	66	70	55	71	53	53	91	23	58
13370	NM_053205	chr10	23640211	23641210	+	Taar1	Unmarked	3.896	0.926	17.397	1.154	75	71	60	55	53	100	83	77	59	48	38	46	74	94	10	56
12334	NM_001007266	chr10	23658377	23661389	+	Taar2	Unmarked	4.25	0.673	20.074	0.97	97	60	97	53	55	85	68	55	74	60	55	42	82	58	10	48
7773	NM_001008429	chr10	23669363	23670395	+	Taar3	Unmarked	2.833	0.404	36.668	1.515	87	83	62	52	55	101	78	63	72	46	45	43	70	68	20	54
13294	NM_001008499	chr10	23680299	23681343	+	Taar4	Unmarked	2.833	0.621	17.665	0.9	54	68	56	61	43	81	85	86	54	63	56	43	88	82	20	59
8290	NM_001009574	chr10	23690511	23691525	+	Taar5	Unmarked	4.25	0.866	33.992	1.425	40	61	67	44	45	98	90	84	52	65	47	54	75	92	14	71
9721	NM_001010828	chr10	23704414	23705452	-	Taar6	Unmarked	1.771	0.361	28.639	1.104	74	68	52	49	48	82	86	84	53	57	53	48	68	93	20	64
16463	NM_001010829	chr10	23712210	23713287	-	Taar7a	Unmarked	0.708	0.337	11.509	0.82	73	75	64	50	55	88	95	63	63	56	63	47	70	82	8	47
17834	NM_001010827	chr10	23719744	23720821	+	Taar7b	Unmarked	0	0	9.635	0.67	59	73	67	55	63	90	102	51	61	65	64	49	71	77	7	45
23063	NM_001010838	chr10	23747027	23748104	+	Taar7d	Unmarked	1.417	0.367	5.353	0.305	75	71	68	46	51	84	95	72	61	56	68	46	73	90	1	42
20051	NM_001010835	chr10	23757419	23758496	+	Taar7e	Unmarked	0	0	7.494	0.611	73	71	68	52	59	85	96	59	62	57	64	50	70	86	5	42
19756	NM_001010839	chr10	23769315	23770392	+	Taar7f	Unmarked	1.063	0.168	7.762	0.434	70	76	69	51	64	81	95	62	62	58	64	46	69	87	3	42
22060	NM_001010830	chr10	23796305	23797340	+	Taar8a	Unmarked	0	0	5.888	0.84	72	82	54	45	56	105	91	77	47	63	52	42	77	80	7	49
16096	NM_001010837	chr10	23811065	23812100	-	Taar8b	Unmarked	0.708	1.01	12.044	1.272	71	77	67	41	54	114	87	72	49	62	49	47	81	75	4	49
22435	NM_001010840	chr10	23820648	23821757	-	Taar8c	Unmarked	0	0	5.888	0.672	81	84	58	48	66	106	86	71	50	60	46	39	74	80	5	45
11011	NM_001010831	chr10	23828293	23829340	-	Taar9	Unmarked	3.542	1.122	23.821	1.014	48	46	65	54	37	94	94	69	61	60	64	58	67	94	20	68
16353	NM_016797	chr10	23869122	23908765	+	Stx7	H3K4me3-only	194.44	20.537	11.509	0.444	46	35	75	45	27	68	68	60	61	42	98	90	67	79	50	88
2076	NM_021509	chr10	23943322	24022589	+	Moxd1	Bivalent	70.126	11.764	77.886	3.417	34	24	71	35	17	54	60	74	54	43	124	93	60	84	58	114
16403	NM_010217	chr10	24315247	24318488	+	Ctgf	H3K4me3-only	114.752	14.228	11.509	0.345	67	41	92	39	29	65	56	70	75	44	63	76	68	69	47	98
1709	NM_008813	chr10	24361216	24431908	-	Enpp1	H3K4me3-only	188.419	29.851	82.169	2.757	49	29	73	51	28	38	49	50	57	48	125	101	69	49	84	99
14338	NM_134005	chr10	24493619	24556001	-	Enpp3	Unmarked	3.542	0.594	15.256	0.702	91	63	82	58	60	102	77	47	67	56	49	50	75	66	14	42
17608	NM_027347	chr10	24589791	24633335	+	Med23	H3K4me3-only	264.566	22.19	9.903	0.372	66	46	69	48	41	74	62	60	58	54	84	70	64	63	52	88
17725	NM_001166416	chr10	24589791	24633335	+	Med23	H3K4me3-only	264.566	22.19	9.903	0.372	66	46	69	48	41	74	62	60	58	54	84	70	64	63	52	88
7943	NM_007482	chr10	24635012	24647276	-	Arg1	Unmarked	6.375	1.299	35.865	1.86	80	49	80	55	38	71	82	55	67	52	68	57	79	74	14	78
10720	NM_018747	chr10	24888895	25018969	-	Akap7	Unmarked	3.896	0.741	24.892	1.059	81	50	79	63	42	51	76	65	70	63	42	45	81	70	23	98
9604	NM_001199265	chr10	25079603	25243324	+	Epb4.1l2	H3K4me3-only	183.815	34.946	28.906	1.114	41	16	65	36	13	38	41	60	61	36	164	114	42	62	105	105
16250	NM_013511	chr10	25128173	25243324	+	Epb4.1l2	Unmarked	4.604	0.691	11.777	0.46	44	60	68	39	53	114	110	52	59	78	70	62	55	78	20	37
7610	NM_001195596	chr10	25247748	25256078	-	Smlr1	Unmarked	8.146	1.659	37.471	1.752	64	42	87	56	34	66	70	69	66	54	69	56	85	77	19	85
22785	NR_045349	chr10	25499119	25557243	-	4930401C15Rik	Unmarked	1.063	0.379	5.621	0.364	115	64	58	66	75	80	75	76	42	64	31	33	72	98	5	45
3603	NM_029881	chr10	25710991	25798858	-	Tmem200a	H3K4me3-only	123.96	11.783	62.63	2.126	51	47	61	48	39	77	64	65	57	44	94	75	61	77	50	89
3286	NR_028030	chr10	25798060	25799253	+	Gm9767	H3K4me3-only	195.503	25.341	65.307	2.116	50	21	72	55	18	27	50	64	66	38	121	94	63	73	77	110
9708	NM_001013766	chr10	25949512	25980610	+	Samd3	Unmarked	2.125	0.466	28.639	1.458	85	97	96	43	92	76	74	42	84	59	61	34	59	53	7	37
9711	NM_001115154	chr10	25949512	25991978	+	Samd3	Unmarked	2.125	0.466	28.639	1.458	85	97	96	43	92	76	74	42	84	59	61	34	59	53	7	37
9868	NM_172787	chr10	25995257	26094991	-	L3mbtl3	H3K4me3-only	213.92	38.125	27.836	1.087	38	10	66	30	8	25	101	31	68	93	153	122	30	37	116	71
28175	NR_033633	chr10	26393251	26394457	-	Gm8709	Unmarked	1.417	0.367	2.677	0.156	60	78	41	75	52	101	82	76	47	46	49	39	95	85	9	64
8571	NM_176837	chr10	26492317	26638454	+	Arhgap18	H3K4me3-only	67.647	9.646	32.921	1.49	112	39	73	49	32	52	88	47	66	53	96	69	63	74	27	59
9159	NM_008481	chr10	26701091	27336748	-	Lama2	H3K4me3-only	19.479	3.086	30.78	1.567	57	33	83	50	33	73	63	67	62	39	91	69	72	91	23	93
17838	NM_008983	chr10	27794625	28317203	+	Ptprk	H3K4me3-only	347.797	82.651	9.635	0.302	32	19	66	35	20	51	62	64	53	50	121	114	48	76	89	99
18179	NM_178666	chr10	28388200	28602555	+	Themis	Unmarked	5.667	0.77	9.368	0.387	90	57	76	65	58	88	73	62	55	60	37	41	84	76	7	70
21867	NR_033601	chr10	28641768	28643313	-	4930519F09Rik	Unmarked	1.417	0.238	6.156	0.462	82	79	70	49	57	73	92	51	61	53	57	62	81	68	14	50
19145	NM_026336	chr10	28692093	28706112	-	2310057J18Rik	Unmarked	1.417	0.337	8.297	0.563	96	101	56	51	84	113	77	59	59	45	51	33	66	73	4	31
7287	NM_026138	chr10	28863801	28919434	+	Soga3	H3K4me3-only	83.585	10.364	39.077	1.548	79	42	86	35	29	67	68	72	80	44	76	70	54	83	40	74
18585	NM_001162537	chr10	28931448	28950585	+	9330159F19Rik	Unmarked	3.188	1.01	8.832	0.494	81	54	77	48	48	85	104	59	65	69	49	53	66	89	6	46
14818	NM_001110195	chr10	29032971	29066467	+	Echdc1	H3K4me3-only	208.961	54.177	14.185	0.525	76	32	76	43	25	68	61	61	58	43	83	93	68	71	58	83
14171	NM_025855	chr10	29033305	29066467	+	Echdc1	H3K4me3-only	185.94	33.138	15.524	0.575	69	39	74	41	27	68	66	63	64	47	92	86	63	70	57	73
20597	NM_026518	chr10	29063981	29082248	-	Rnf146	H3K4me3-only	150.523	28.617	6.959	0.283	79	45	76	53	35	64	61	48	69	46	89	78	70	54	55	77
20639	NM_001110198	chr10	29063981	29082248	-	Rnf146	H3K4me3-only	150.523	28.617	6.959	0.283	79	45	76	53	35	64	61	48	69	46	89	78	70	54	55	77
20734	NM_001110197	chr10	29063981	29082248	-	Rnf146	H3K4me3-only	150.523	28.617	6.959	0.283	79	45	76	53	35	64	61	48	69	46	89	78	70	54	55	77
20883	NM_001110196	chr10	29063981	29082248	-	Rnf146	H3K4me3-only	150.523	28.617	6.959	0.283	79	45	76	53	35	64	61	48	69	46	89	78	70	54	55	77
2456	NM_028351	chr10	29172912	29255673	-	Rspo3	Bivalent	102.002	24.24	73.604	3.133	55	32	64	46	26	54	63	74	50	44	59	86	67	86	53	140
26163	NM_001109747	chr10	29915814	29920346	-	Cenpw	H3K4me3-only	206.482	16.356	3.747	0.146	85	46	69	47	46	60	59	54	55	48	84	78	60	66	53	89
22356	NM_028604	chr10	30254030	30320555	-	Trmt11	H3K4me3-only	275.192	21.799	5.888	0.193	52	35	76	46	30	63	76	55	66	53	121	83	61	73	50	59
23811	NR_045008	chr10	30323000	30326440	-	Gm20300	Unmarked	0	0	5.085	0.414	40	76	55	26	51	184	93	75	50	69	48	35	57	73	6	61
22843	NM_025798	chr10	30328012	30338172	-	Hint3	H3K4me3-only	184.169	21.883	5.621	0.198	51	41	66	50	42	77	71	72	59	59	77	72	57	84	53	68
16630	NM_172495	chr10	30365387	30522913	-	Ncoa7	H3K4me3-only	271.296	48.351	11.241	0.486	32	16	78	37	22	15	43	55	52	28	118	136	57	75	96	139
16868	NM_001111267	chr10	30365387	30375673	-	Ncoa7	H3K4me3-only	23.73	4.834	10.974	0.53	100	39	82	52	41	87	86	51	73	62	59	47	59	78	14	69
2217	NM_013904	chr10	30552164	30562589	-	Hey2	H3K4me3-only	148.398	20.152	76.28	2.364	45	18	89	53	20	22	45	45	80	39	128	108	61	53	93	100
27613	NM_027168	chr10	31033210	31047892	+	Hddc2	H3K4me3-only	176.023	19.305	2.944	0.104	50	25	99	37	25	58	74	46	75	44	120	99	60	77	45	65
17966	NM_009413	chr10	31052185	31165727	-	Tpd52l1	H3K4me3-only	174.961	20.789	9.635	0.331	48	41	63	54	47	51	76	54	49	63	94	83	62	74	55	85
22870	NM_011509	chr10	31133531	31134241	-	Gm3258	Unmarked	2.125	0.466	5.621	0.458	118	94	69	51	73	112	74	49	75	46	40	34	66	56	12	30
3232	NM_001146349	chr10	31221692	31329531	-	Rnf217	H3K4me3-only	161.857	24.292	65.842	2.845	48	23	80	44	24	37	56	49	70	50	116	104	53	56	89	100
13101	NM_001013411	chr10	31409124	32609721	-	Nkain2	H3K4me3-only	195.149	30.917	17.933	0.647	41	30	74	36	22	40	69	43	52	46	112	127	66	59	82	100
13087	NM_001025286	chr10	31670384	32609721	-	Nkain2	H3K4me3-only	195.149	30.917	17.933	0.647	41	30	74	36	22	40	69	43	52	46	112	127	66	59	82	100
23465	NM_029726	chr10	32803288	33196515	+	Trdn	Unmarked	2.125	0.303	5.085	0.213	85	57	81	54	64	100	82	50	67	55	54	47	60	85	6	52
18975	NR_040657	chr10	32942150	32976163	-	D830005E20Rik	Unmarked	0.354	0.046	8.565	0.365	101	97	64	49	95	124	74	56	51	59	30	30	63	70	2	34
14379	NM_175448	chr10	33232139	33344406	-	Clvs2	H3K4me3-only	123.252	27.035	15.256	0.713	58	42	73	41	40	65	72	67	60	41	88	82	56	96	38	80
20470	NM_001101452	chr10	33486229	33501921	-	Gm4794	Unmarked	0	0	7.227	0.343	133	120	57	47	111	112	61	60	50	53	31	17	62	59	2	24
28155	NM_020565	chr10	33577527	33599281	+	Sult3a1	Unmarked	0.354	0.202	2.677	0.254	47	85	50	25	71	193	98	77	44	78	43	27	46	82	1	32
26783	NM_001162957	chr10	33624916	33635827	+	Rsph4a	H3K4me3-only	103.418	12.823	3.479	0.129	77	51	81	75	43	62	54	74	77	38	53	43	87	81	23	80
21338	NM_028287	chr10	33646741	33671018	-	Zufsp	H3K4me3-only	199.045	21.83	6.424	0.211	85	51	68	48	51	75	67	62	65	59	82	58	51	70	47	60
20798	NR_015526	chr10	33707021	33714861	-	A830082N09Rik	Unmarked	0	0	6.959	0.382	101	65	86	43	50	106	93	52	78	67	50	40	65	64	6	33
25186	NM_025614	chr10	33716360	33739422	-	Rwdd1	H3K4me3-only	385.339	49.947	4.282	0.137	39	22	65	51	9	40	48	73	62	37	95	109	68	70	95	116
16477	NM_001162937	chr10	33757402	33829621	+	Trappc3l	Unmarked	1.771	0.266	11.509	0.45	97	63	80	40	65	135	66	43	51	55	49	52	67	56	12	68
9319	NM_001081165	chr10	33758589	33764119	-	Fam26d	Unmarked	2.125	0.551	29.977	1.474	63	52	64	42	42	107	107	72	63	72	43	53	53	97	16	53
21635	NM_178908	chr10	33811157	33816325	-	Fam26e	H3K4me3-only	113.335	14.69	6.424	0.221	83	50	57	53	45	90	92	66	54	53	54	63	62	99	21	57
8922	NM_175449	chr10	33845872	33847778	-	Fam26f	H3K4me3-only	51.001	6.926	31.583	1.112	54	37	68	55	33	62	89	55	57	58	80	86	71	82	44	68
26582	NM_172508	chr10	33871198	33927357	-	Dse	H3K4me3-only	289.359	31.735	3.479	0.109	44	27	66	54	21	59	53	66	61	41	126	86	64	72	69	90
25862	NM_009433	chr10	34001995	34004691	+	Tspyl1	H3K4me3-only	346.026	41.115	4.015	0.121	43	26	84	61	20	43	71	45	83	64	118	79	68	46	71	77
12490	NM_030203	chr10	34017226	34021126	+	Tspyl4	H3K4me3-only	210.732	24.037	19.538	0.619	93	58	74	49	42	55	72	57	77	42	69	74	62	71	47	57
23696	NM_176968	chr10	34023417	34138334	-	Nt5dc1	H3K4me3-only	212.857	25.292	5.085	0.21	56	30	70	57	38	57	68	60	51	55	66	85	69	80	53	104
13464	NM_009925	chr10	34109786	34116891	+	Col10a1	Unmarked	2.479	0.372	17.13	0.857	120	93	71	46	82	107	47	59	53	38	48	39	74	58	12	52
10989	NM_010237	chr10	34203205	34331036	+	Frk	H3K4me3-only	43.209	4.564	24.089	0.708	81	44	91	35	47	91	67	72	62	48	82	61	61	94	13	50
11005	NM_001159544	chr10	34203205	34331036	+	Frk	H3K4me3-only	43.209	4.564	24.089	0.708	81	44	91	35	47	91	67	72	62	48	82	61	61	94	13	50
3798	NM_001253356	chr10	36226612	36554200	+	Hs3st5	H3K4me3-only	192.67	16.65	60.757	1.969	30	26	80	42	23	35	59	76	64	38	93	99	61	94	63	116
3823	NM_001081208	chr10	36226612	36554200	+	Hs3st5	H3K4me3-only	192.67	16.65	60.757	1.969	30	26	80	42	23	35	59	76	64	38	93	99	61	94	63	116
3825	NM_001253355	chr10	36226612	36554200	+	Hs3st5	H3K4me3-only	192.67	16.65	60.757	1.969	30	26	80	42	23	35	59	76	64	38	93	99	61	94	63	116
10721	NM_008229	chr10	36694349	36721694	+	Hdac2	H3K4me3-only	305.296	27.205	24.892	0.732	24	10	67	41	19	12	65	54	54	61	136	120	45	66	104	121
9695	NM_008538	chr10	36853048	36858732	-	Marcks	H3K4me3-only	226.67	17.47	28.639	0.756	65	49	54	44	39	113	60	62	51	41	62	82	57	71	60	89
19657	NM_001177783	chr10	38540346	38541585	-	Rfpl4b	Unmarked	0.708	0.119	7.762	0.452	104	72	66	55	69	95	74	72	67	50	43	31	57	93	8	43
7381	NM_010681	chr10	38685320	38829994	+	Lama4	H3K4me3-only	45.334	7.182	38.542	1.465	73	43	102	44	31	37	64	68	89	46	101	57	69	74	25	76
18617	NM_183254	chr10	38838613	38853701	-	Fam229b	H3K4me3-only	188.419	26.867	8.832	0.327	68	43	87	68	44	42	47	54	66	38	76	79	88	64	49	86
18431	NM_028006	chr10	38853828	38870864	+	Tube1	H3K4me3-only	207.545	26.901	9.1	0.351	42	42	63	44	44	61	81	69	53	61	87	79	52	90	49	82
4685	NM_001127376	chr10	38870776	38883600	-	Wisp3	Unmarked	6.729	1.199	54.065	2.855	67	42	80	63	37	55	74	65	71	56	89	48	77	78	21	76
2852	NM_001122892	chr10	39089604	39285180	+	Fyn	H3K4me3-only	150.169	15.861	69.054	2.188	29	22	71	46	11	26	44	68	55	27	99	128	73	73	96	131
2864	NM_001122893	chr10	39089604	39285180	+	Fyn	H3K4me3-only	150.169	15.861	69.054	2.188	29	22	71	46	11	26	44	68	55	27	99	128	73	73	96	131
2870	NM_008054	chr10	39089604	39285180	+	Fyn	H3K4me3-only	150.169	15.861	69.054	2.188	29	22	71	46	11	26	44	68	55	27	99	128	73	73	96	131
26542	NM_134000	chr10	39332739	39375113	+	Traf3ip2	H3K4me3-only	94.564	11.725	3.479	0.12	89	35	89	43	31	58	94	58	64	77	67	63	72	71	21	67
28435	NR_038037	chr10	39341216	39451813	-	E130307A14Rik	H3K4me3-only	416.86	54.032	2.409	0.069	20	18	68	30	11	33	44	47	66	35	177	141	39	49	129	92
28738	NM_011264	chr10	39451965	39595011	+	Rev3l	H3K4me3-only	456.528	50.069	2.141	0.057	35	20	52	37	12	17	44	65	50	36	105	133	47	65	124	157
16768	NR_033628	chr10	39612565	39619044	-	AA474331	H3K4me3-only	130.335	14.867	10.974	0.441	46	33	64	48	29	59	78	61	52	63	104	87	65	71	60	79
3017	NM_001163503	chr10	39640187	39646729	-	2010001E11Rik	H3K4me3-only	74.022	8.443	67.716	2.971	44	25	83	42	20	56	76	61	76	54	120	82	53	78	53	76
4658	NM_001173500	chr10	39666717	39679959	-	G630090E17Rik	H3K4me3-only	64.813	8.036	54.333	1.703	42	28	80	47	28	74	66	75	54	51	83	89	74	90	47	71
3207	NM_001113388	chr10	39677866	39706452	-	BC021785	H3K27me3-only	6.021	0.954	65.842	3.477	69	25	74	54	24	60	97	54	72	67	98	56	57	82	24	86
3201	NM_001113385	chr10	39687958	39706452	-	BC021785	H3K27me3-only	6.021	0.954	65.842	3.477	69	25	74	54	24	60	97	54	72	67	98	56	57	82	24	86
3213	NM_001001489	chr10	39687958	39706452	-	BC021785	H3K27me3-only	6.021	0.954	65.842	3.477	69	25	74	54	24	60	97	54	72	67	98	56	57	82	24	86
2617	NM_144821	chr10	39721378	39745074	-	AI317395	Bivalent	93.501	16.664	71.73	3.353	34	27	84	49	25	43	86	51	76	54	107	91	59	81	51	81
4102	NM_001114332	chr10	39753340	39862060	-	Slc16a10	H3K4me3-only	121.127	19.19	58.348	2.054	44	35	59	37	30	43	66	58	55	56	109	105	46	63	90	103
4127	NM_028247	chr10	39795207	39862060	-	Slc16a10	H3K4me3-only	121.127	19.19	58.348	2.054	44	35	59	37	30	43	66	58	55	56	109	105	46	63	90	103
25161	NM_001042556	chr10	39943051	39966785	-	Rpf2	H3K4me3-only	293.963	33.531	4.282	0.133	68	47	57	54	42	75	75	67	60	67	71	65	56	71	60	64
25429	NM_023323	chr10	39943051	39966845	-	Rpf2	H3K4me3-only	279.442	34.649	4.282	0.134	65	45	56	52	42	67	78	69	57	68	72	70	55	75	61	67
23604	NM_026113	chr10	39969008	39977471	-	Gtf3c6	H3K4me3-only	301.4	30.696	5.085	0.161	56	44	78	34	42	91	72	66	70	64	95	61	45	71	45	65
16239	NM_009665	chr10	40007263	40021994	-	Amd1	H3K4me3-only	206.836	31.042	11.777	0.405	92	31	67	59	33	62	50	61	57	44	72	83	68	69	66	85
16274	NM_007444	chr10	40007270	40021992	-	Amd2	H3K4me3-only	206.836	31.042	11.777	0.405	92	31	68	59	33	62	50	61	57	44	72	82	68	69	66	85
23469	NM_001168304	chr10	40069113	40203624	+	Cdk19	H3K4me3-only	383.568	40.512	5.085	0.148	58	24	85	37	25	32	55	47	75	45	133	110	46	58	91	78
23878	NM_198164	chr10	40069113	40203624	+	Cdk19	H3K4me3-only	383.568	40.512	5.085	0.148	58	24	85	37	25	32	55	47	75	45	133	110	46	58	91	78
14515	NM_027572	chr10	40290167	40323938	+	Slc22a16	Unmarked	9.563	1.948	14.988	0.89	86	39	69	71	26	43	74	47	59	51	101	62	94	57	29	91
6925	NM_027442	chr10	40349816	40369737	+	Ddo	Unmarked	6.021	0.904	40.683	1.785	53	43	79	57	42	85	76	75	61	53	77	53	77	96	12	60
6756	NM_177793	chr10	40403087	40530889	+	Mettl24	H3K4me3-only	100.585	11.952	41.486	1.376	31	21	63	48	27	45	68	83	48	41	100	96	57	115	55	101
22462	NM_027879	chr10	40551426	40602949	-	Cdc40	H3K4me3-only	328.317	40.709	5.621	0.186	57	50	71	40	44	71	66	80	68	56	86	63	49	84	50	64
20500	NM_031877	chr10	40603339	40658375	+	Wasf1	H3K4me3-only	226.67	28.105	7.227	0.245	51	39	76	37	25	44	49	62	65	42	96	104	62	55	87	105
1394	NM_199058	chr10	40790298	40791390	-	Gpr6	Bivalent	81.105	10.056	86.719	3.864	36	33	71	41	27	57	83	68	47	63	88	101	71	82	57	74
29203	NM_133999	chr10	40907977	41023047	-	Fig4	H3K4me3-only	350.276	26.996	1.338	0.037	66	37	66	55	32	68	71	53	56	49	94	82	70	70	50	80
22082	NM_001277229	chr10	41170163	41185388	+	Zbtb24	H3K4me3-only	356.651	27.488	5.888	0.191	55	40	73	54	47	64	46	62	57	55	99	73	63	61	65	85
22091	NR_102360	chr10	41170163	41185388	+	Zbtb24	H3K4me3-only	356.651	27.488	5.888	0.191	55	40	73	54	47	64	46	62	57	55	99	73	63	61	65	85
22296	NM_001277230	chr10	41170163	41173274	+	Zbtb24	H3K4me3-only	356.651	27.488	5.888	0.191	55	40	73	54	47	64	46	62	57	55	99	73	63	61	65	85
22440	NM_153398	chr10	41170163	41185388	+	Zbtb24	H3K4me3-only	356.651	27.488	5.888	0.191	55	40	73	54	47	64	46	62	57	55	99	73	63	61	65	85
20681	NM_001164433	chr10	41196119	41206836	+	Mical1	H3K4me3-only	162.211	17.79	6.959	0.226	31	22	67	53	25	62	81	65	54	53	94	83	64	95	42	108
20847	NM_138315	chr10	41196119	41206836	+	Mical1	H3K4me3-only	162.211	17.79	6.959	0.226	31	22	67	53	25	62	81	65	54	53	94	83	64	95	42	108
14877	NM_009213	chr10	41206977	41210146	-	Smpd2	H3K4me3-only	268.108	27.305	14.185	0.487	45	23	73	51	17	45	51	63	58	39	96	104	73	69	77	115
14837	NM_028430	chr10	41210244	41234094	+	Ppil6	H3K4me3-only	260.316	27.494	14.185	0.487	57	32	63	39	20	54	68	59	58	48	106	101	56	67	76	95
25787	NM_016898	chr10	41239305	41250848	+	Cd164	H3K4me3-only	412.61	37.955	4.015	0.105	35	15	55	54	15	26	48	62	54	40	108	129	55	70	120	113
11225	NM_001177571	chr10	41258654	41307559	-	Ccdc162	Unmarked	3.188	0.827	23.286	1.207	65	64	68	54	54	80	80	77	48	64	46	49	83	83	14	70
10886	NR_045341	chr10	41287821	41296282	+	5730435O14Rik	Unmarked	0.708	0.112	24.356	1.615	108	70	48	74	59	112	70	63	45	52	46	31	88	70	10	53
22549	NM_026643	chr10	41438645	41529674	-	Cep57l1	H3K4me3-only	264.566	25.149	5.621	0.172	60	30	73	43	24	58	63	48	63	49	93	93	59	56	70	117
22722	NM_001243074	chr10	41438645	41529674	-	Cep57l1	H3K4me3-only	264.566	25.149	5.621	0.172	60	30	73	43	24	58	63	48	63	49	93	93	59	56	70	117
23141	NM_029132	chr10	41438645	41529469	-	Cep57l1	H3K4me3-only	230.92	23.518	5.353	0.17	91	35	71	44	27	68	72	42	68	48	84	86	55	58	59	91
23190	NM_001243075	chr10	41438645	41529469	-	Cep57l1	H3K4me3-only	230.92	23.518	5.353	0.17	91	35	71	44	27	68	72	42	68	48	84	86	55	58	59	91
21126	NM_001162908	chr10	41530379	41628242	+	Sesn1	H3K4me3-only	217.816	28.233	6.691	0.199	55	25	67	55	18	58	77	47	82	41	119	83	48	76	61	87
13799	NM_001013370	chr10	41607244	41628242	+	Sesn1	H3K4me3-only	132.814	21.042	16.327	0.638	54	30	66	44	24	49	71	48	52	48	99	111	64	65	74	100
2305	NM_001034858	chr10	41634796	41738188	-	Armc2	H3K4me3-only	100.231	12.992	75.477	2.562	39	35	72	49	35	49	73	62	58	56	87	90	63	80	59	92
20858	NM_019740	chr10	41905591	41996548	-	Foxo3	H3K4me3-only	345.318	46.893	6.959	0.196	25	15	64	41	13	41	60	55	56	52	114	113	51	61	96	142
21968	NM_145743	chr10	42032390	42198371	-	Lace1	H3K4me3-only	182.753	22.66	6.156	0.217	53	39	72	48	39	61	61	73	49	56	85	79	71	78	52	83
22301	NM_017472	chr10	42221859	42255175	+	Snx3	H3K4me3-only	307.775	28.312	5.888	0.17	42	28	63	43	21	41	48	71	56	46	85	108	57	66	99	125
8	NM_152229	chr10	42281776	42303394	-	Nr2e1	Bivalent	81.105	12.849	136.502	4.99	47	48	67	49	28	61	54	86	60	36	62	78	76	84	53	110
19658	NM_172416	chr10	42398721	42422268	+	Ostm1	H3K4me3-only	278.379	28.351	7.762	0.351	47	32	75	51	24	33	76	56	59	45	100	110	74	79	63	75
14048	NM_153055	chr10	42481301	42552320	+	Sec63	H3K4me3-only	162.919	20.201	15.791	0.682	36	24	67	38	23	54	54	59	65	43	145	113	41	69	100	68
3153	NM_172938	chr10	42580317	42680588	+	Scml4	H3K27me3-only	9.563	1.186	66.377	3.155	62	43	69	78	51	64	98	52	46	76	64	66	94	82	20	34
1490	NM_175407	chr10	42722305	42894336	-	Sobp	Bivalent	234.462	47.762	85.381	3.29	22	14	67	55	10	17	30	67	52	26	100	127	75	67	108	162
1744	NR_102361	chr10	42894504	42896371	+	9030612E09Rik	Bivalent	212.149	37.809	81.901	3.073	20	10	77	32	11	22	61	59	72	45	146	125	36	76	104	103
25470	NM_001168289	chr10	42941291	43184688	+	Pdss2	H3K4me3-only	452.986	51.669	4.282	0.129	32	30	71	42	26	50	52	78	47	44	93	100	70	82	68	114
25506	NM_027772	chr10	42941291	43160054	+	Pdss2	H3K4me3-only	452.986	51.669	4.282	0.129	32	30	71	42	26	50	52	78	47	44	93	100	70	82	68	114
13576	NM_199028	chr10	43198945	43235223	+	Bend3	H3K4me3-only	197.628	40.258	16.862	0.601	33	8	59	41	5	13	42	37	52	42	126	156	52	34	149	150
22315	NM_026411	chr10	43244926	43260800	-	1700021F05Rik	H3K4me3-only	267.754	33.2	5.888	0.23	40	22	62	56	30	54	59	66	56	50	111	78	54	82	64	115
7551	NM_009846	chr10	43298974	43304071	+	Cd24a	H3K4me3-only	291.129	43.693	38.006	1.322	32	16	60	45	16	38	72	46	54	57	136	111	52	61	89	114
[truncated: 27,944 more rows]
