# Supplementary material for: Decoding the function of bivalent chromatin in development and cancer
Source: HighWire-hosted journal article supplement (doi:10.1101/gr.275736.121), 2021-10-19
Supplement: Supplemental_Table_S3.xlsx [file Supplemental_Table_S3.xlsx]

## Sheet: Genes Upreg. in EpiLC vs ESCs
Supplemental Table 3A. Genes upregulated during ESC to EpiLC differentiation
RefSeq Accession	Gene Symbol	Gene Coordinates (mm9)	Gene Expression (FPKM)		Fold Change (Log2)	Test Statistics	P-value	Q-value	Significant?
			Naïve ESCs (0h)	EpiLCs (72h)
NM_011580	Thbs1	chr2:117937657-117952869	0.0121702	12.4598	9.99971	-9.66435	0	0	yes
NM_001007580	Fndc3c1	chrX:103615381-103680568	0.0147586	8.11633	9.10312	-8.7911	0	0	yes
NM_018744	Sema6a	chr18:47404907-47528522	0.0348163	13.3156	8.57914	-11.2365	0	0	yes
NM_175751	Zfp608	chr18:55047698-55149834	0.0279971	8.1398	8.18357	-9.34739	0	0	yes
NM_001033339	Mmp25	chr17:23766424-23782236	0.0733887	20.7508	8.14339	-10.676	0	0	yes
NM_194055	Esrp1	chr4:11259079-11313930	0.111914	27.5862	7.94541	-11.2881	0	0	yes
NM_011141	Pou3f1	chr4:124334888-124337899	0.107278	17.689	7.36536	-10.1722	0	0	yes
NM_010664	Krt18	chr15:101858646-101862457	0.994407	122.703	6.94712	-11.4672	0	0	yes
NM_177305	Arl4c	chr1:90594800-90598766	0.327465	37.2745	6.8307	-11.5493	0	0	yes
NM_015736	Galnt3	chr2:65920822-65962850	0.0890856	9.79749	6.78108	-9.39768	0	0	yes
NM_001080814	Fat3	chr9:15714636-16182675	0.0198247	1.85101	6.54487	-9.23175	0	0	yes
NM_198029	Fermt1	chr2:132729914-132771772	0.0481536	4.32111	6.48761	-8.50958	0	0	yes
NM_013657	Sema3c	chr5:17080633-17236085	0.0909448	8.13815	6.48356	-9.44632	0	0	yes
NM_010288	Gja1	chr10:56097105-56110225	1.35567	114.949	6.40585	-12.3057	0	0	yes
NM_181395	Pxdn	chr12:30622900-30702523	0.196275	14.7299	6.22973	-10.4165	0	0	yes
NM_176933	Dusp4	chr8:35870663-35882948	0.387368	28.4217	6.19715	-9.92123	0	0	yes
NM_010330	Emb	chr13:118009379-118063222	2.44002	166.638	6.09368	-12.5881	0	0	yes
NM_016917	Slc40a1	chr1:45964914-45982439	0.202094	13.4633	6.05786	-9.13843	0	0	yes
NM_001145800	Igsf9	chr1:174412343-174429008	0.210411	12.743	5.92035	-9.16947	0	0	yes
NM_029357	Pcdh1	chr18:38356347-38369416	0.11921	6.67202	5.80655	-8.55519	0	0	yes
NM_144552	Stxbp6	chr12:45953472-46175470	0.107313	5.53466	5.6886	-8.33239	0	0	yes
NM_001081185	Flnc	chr6:29383152-29411888	0.105672	5.30841	5.65061	-9.28345	0	0	yes
NM_010071	Dok2	chr14:71174187-71178301	0.325138	15.2972	5.55607	-8.36215	0	0	yes
NM_018777	Cldn6	chr17:23816331-23819414	1.66115	73.6204	5.46985	-9.7243	0	0	yes
NM_016798	Pdlim3	chr8:46970838-47004900	0.420728	18.3942	5.45022	-8.39267	0	0	yes
NM_009234	Sox11	chr12:28019132-28027583	0.179219	6.35956	5.14913	-8.34244	0	0	yes
NM_001081088	Lrp2	chr2:69262391-69424124	0.634796	21.4876	5.08107	-11.4775	0	0	yes
NM_007725	Cnn2	chr10:79451344-79458145	3.32359	104.821	4.97905	-9.98635	0	0	yes
NM_001122997	Dnmt3b	chr2:153475184-153513466	4.77197	144.729	4.92263	-8.38014	0	0	yes
NM_026268	Dusp6	chr10:98725864-98730123	3.51992	95.476	4.76152	-10.9788	0	0	yes
NM_080793	Setd7	chr3:51319239-51371038	0.378362	9.44093	4.64109	-8.55125	0	0	yes
NM_001029868	Pdzd4	chrX:71038695-71070308	2.10111	50.6035	4.59001	-9.57418	0	0	yes
NM_138606	Pim2	chrX:7455431-7460558	2.99751	65.2666	4.44451	-9.27893	0	0	yes
NM_144841	Otx2	chr14:49277351-49287319	2.69809	51.9537	4.26722	-8.29477	0	0	yes
NM_001081298	Lphn2	chr3:148478549-148617599	0.866357	15.8567	4.19399	-8.3366	0	0	yes
NM_001081302	Trio	chr15:27660403-27955603	1.13067	17.4081	3.9445	-9.818	0	0	yes
NM_011204	Ptpn13	chr5:103854210-104027380	1.17035	15.5933	3.73591	-8.76163	0	0	yes
NM_013723	Podxl	chr6:31469492-31513937	1.69072	22.057	3.70552	-8.55069	0	0	yes
NM_008482	Lamb1	chr12:31950158-32014504	3.22319	40.5943	3.65472	-9.74784	0	0	yes
NM_009230	Soat1	chr1:158358238-158404459	3.33987	38.4349	3.52455	-9.12756	0	0	yes
NM_008532	Epcam	chr17:88035318-88050467	11.7192	130.092	3.47259	-9.57384	0	0	yes
NM_016701	Nes	chr3:87775014-87784373	2.59157	25.1279	3.27739	-8.56899	0	0	yes
NM_178920	Mal2	chr15:54402920-54434401	0.0483085	8.45808	7.45191	-8.17799	2.22045e-16	2.23551e-14	yes
NM_008216	Has2	chr15:56497181-56526101	0.0674472	7.08462	6.71479	-8.21481	2.22045e-16	2.23551e-14	yes
NM_016887	Cldn7	chr11:69778280-69781388	1.0149	44.3334	5.44898	-8.14324	4.44089e-16	4.33705e-14	yes
NM_016866	Stk39	chr2:68048503-68310038	1.56606	25.7686	4.04041	-8.1564	4.44089e-16	4.33705e-14	yes
NR_015456	D7Ertd715e	chr7:67114462-67119317	1.74164	32.6627	4.22913	-8.08388	6.66134e-16	6.39423e-14	yes
NM_133942	Plekha1	chr7:138009423-138056816	10.3918	71.1569	2.77556	-8.0956	6.66134e-16	6.39423e-14	yes
NM_182991	Tmem59l	chr8:73007769-73011257	0.0862784	13.8643	7.32816	-8.05432	8.88178e-16	8.38711e-14	yes
NM_019634	Tspan7	chrX:10062241-10173730	0.500896	19.0138	5.24639	-8.04084	8.88178e-16	8.38711e-14	yes
NM_001031772	Lin28b	chr10:45096424-45190007	0.739127	13.0152	4.13823	-8.03403	8.88178e-16	8.38711e-14	yes
NM_145833	Lin28a	chr4:133559244-133574731	16.1855	114.247	2.81938	-8.05408	8.88178e-16	8.38711e-14	yes
NM_030082	Hist3h2ba	chr11:58762412-58762874	14.7679	244.532	4.04949	-7.95432	1.77636e-15	1.62524e-13	yes
NM_013871	Mapk12	chr15:88961013-88971133	1.02647	23.0639	4.48988	-7.85359	3.9968e-15	3.51864e-13	yes
NM_007765	Crmp1	chr5:37633296-37683402	0.782364	20.9385	4.74217	-7.82133	5.32907e-15	4.624e-13	yes
NM_010590	Ajuba	chr14:55186305-55196498	11.1638	67.9674	2.60602	-7.73981	9.99201e-15	8.36455e-13	yes
NM_010820	Mpdz	chr4:80924403-81088709	0.380847	6.84539	4.16785	-7.66482	1.79856e-14	1.45903e-12	yes
NM_026778	Cthrc1	chr15:38908477-38918665	0.112519	13.9291	6.95179	-7.63516	2.26485e-14	1.81441e-12	yes
NM_030725	Syt13	chr2:92755257-92796208	0.0303115	4.79967	7.30692	-7.62916	2.35367e-14	1.88119e-12	yes
NM_010217	Ctgf	chr10:24315247-24318488	2.27385	30.185	3.73062	-7.62069	2.53131e-14	2.01482e-12	yes
NM_008976	Ptpn14	chr1:191552146-191700572	1.61459	11.564	2.8404	-7.60478	2.86438e-14	2.26423e-12	yes
NM_026240	Gramd3	chr18:56591785-56663446	0.117911	5.59649	5.56876	-7.50527	6.12843e-14	4.63186e-12	yes
NM_197988	1190005I06Rik	chr8:123132501-123158282	1.08939	33.3971	4.93813	-7.42996	1.0858e-13	7.93419e-12	yes
NM_009482	Utf1	chr7:147129754-147131011	6.58752	71.9427	3.44904	-7.42528	1.12577e-13	8.20511e-12	yes
NM_173774	Slc45a1	chr4:150003504-150026283	0.159497	6.23386	5.28852	-7.41574	1.21014e-13	8.79219e-12	yes
NM_198095	Bst2	chr8:74058160-74061336	5.96425	92.3737	3.95307	-7.40849	1.27676e-13	9.24275e-12	yes
NM_008430	Kcnk1	chr8:128519001-128554585	2.36499	28.8073	3.60652	-7.32261	2.43139e-13	1.69013e-11	yes
NM_001277876	Tpm2	chr4:43526597-43536426	0.735684	17.7075	4.58913	-7.32158	2.45137e-13	1.70329e-11	yes
NM_001081403	Klhl14	chr18:21708877-21814608	0.0195052	5.77757	8.21046	-7.29665	2.95097e-13	2.02649e-11	yes
NM_028478	Rassf6	chr5:91032101-91069513	0.152595	6.81161	5.48021	-7.2585	3.91465e-13	2.64199e-11	yes
NM_011978	Slc27a2	chr2:126378759-126413979	6.00969	44.0662	2.87431	-7.25266	4.08562e-13	2.74854e-11	yes
NM_007789	Ncan	chr8:72616983-72644743	0.0490088	2.13961	5.44816	-7.24861	4.20997e-13	2.82667e-11	yes
NM_027289	Nt5dc2	chr14:31948038-31981827	20.2471	116.68	2.52677	-7.23138	4.78062e-13	3.18148e-11	yes
NM_009238	Sox4	chr13:29042598-29045551	1.17386	19.0678	4.02181	-7.21638	5.33795e-13	3.52273e-11	yes
NM_177353	Slc9a7	chrX:19682880-19868890	0.268699	6.96447	4.69595	-7.20672	5.73097e-13	3.76716e-11	yes
NM_172051	Tmcc3	chr10:93977601-94053699	0.128328	3.34126	4.70249	-7.15596	8.30891e-13	5.33166e-11	yes
NM_148938	Slc1a3	chr15:8584123-8660807	0.373643	6.91916	4.21086	-7.15592	8.31113e-13	5.33238e-11	yes
NM_175260	Myh10	chr11:68505416-68630126	7.63935	39.0198	2.35268	-7.1425	9.166e-13	5.84432e-11	yes
NM_012026	Arhgef28	chr13:98668549-98976120	0.189325	3.71393	4.29401	-7.14024	9.31699e-13	5.9351e-11	yes
NM_199028	Bend3	chr10:43198945-43235223	4.55985	25.0126	2.4556	-7.10728	1.1835e-12	7.43212e-11	yes
NM_177049	Jph4	chr14:55725662-55735772	0.0180492	2.51325	7.12148	-7.10042	1.24367e-12	7.77458e-11	yes
NM_172731	Fgd5	chr6:91937103-92025999	0.171788	3.47515	4.33837	-7.02064	2.20846e-12	1.33323e-10	yes
NM_023580	Epha1	chr6:42299826-42330557	0.237953	26.6563	6.80765	-7.01561	2.2895e-12	1.37853e-10	yes
NM_029999	Lbh	chr17:73267644-73291286	0.186256	4.67137	4.64848	-7.00584	2.45493e-12	1.47098e-10	yes
NM_008610	Mmp2	chr8:95351226-95377319	0.478659	8.29961	4.11597	-6.96899	3.19234e-12	1.88036e-10	yes
NM_134005	Enpp3	chr10:24493619-24556001	1.34285	16.9432	3.65733	-6.95205	3.60001e-12	2.10455e-10	yes
NM_025951	Pi4k2b	chr5:53132812-53160583	3.32321	25.1126	2.91776	-6.93328	4.11182e-12	2.38784e-10	yes
NM_001047604	Ttc21b	chr2:66022383-66094674	1.79331	15.9529	3.15312	-6.92567	4.3392e-12	2.51202e-10	yes
NM_013675	Sptb	chr12:77681474-77811534	0.400779	4.71874	3.55753	-6.91457	4.69269e-12	2.70175e-10	yes
NM_001039485	Piezo2	chr18:63169866-63546837	0.0226038	0.950447	5.39397	-6.91255	4.76019e-12	2.73832e-10	yes
NM_001081212	Irs2	chr8:10986963-11054541	1.68448	15.5626	3.20771	-6.88763	5.67302e-12	3.22877e-10	yes
NM_016899	Rab25	chr3:88345950-88352201	1.51788	25.6747	4.08022	-6.86784	6.5179e-12	3.67323e-10	yes
NM_019989	Sh3bgrl	chrX:106290745-106357806	3.41504	27.3284	3.00043	-6.86461	6.66711e-12	3.74899e-10	yes
NM_025572	2610528J11Rik	chr4:118199879-118202822	0.0820056	13.6687	7.38094	-6.85506	7.12852e-12	3.9917e-10	yes
NM_153743	Dnmt3a	chr12:3806979-3914443	0.718804	20.378	4.82527	-6.85093	7.3368e-12	4.10083e-10	yes
NM_177260	Tmem154	chr3:84470113-84508497	0.0176857	7.32159	8.69343	-6.84132	7.84683e-12	4.36655e-10	yes
NM_011261	Reln	chr5:21390271-21850523	0.0130998	0.787624	5.90989	-6.82053	9.07074e-12	4.99747e-10	yes
NM_026496	Grhl2	chr15:37162790-37293323	1.2262	11.741	3.25929	-6.81597	9.36295e-12	5.15257e-10	yes
NM_010572	Irs4	chrX:138145540-138159760	0.0664469	1.82341	4.77829	-6.81417	9.48086e-12	5.21151e-10	yes
NR_037986	Gm16880	chr1:138592787-138622305	0.325533	10.4771	5.00829	-6.80657	9.99489e-12	5.471e-10	yes
NM_018827	Crlf1	chr8:73017054-73027980	0.0569462	6.44415	6.82225	-6.80464	1.01301e-11	5.54188e-10	yes
NM_001093750	Ptchd1	chrX:152004278-152057870	0.0376339	1.5436	5.35813	-6.79489	1.08398e-11	5.91e-10	yes
NM_029770	Unc5b	chr10:60225342-60294329	3.05343	17.7629	2.54036	-6.79451	1.0868e-11	5.92203e-10	yes
NM_172397	Limd2	chr11:106017569-106021456	2.73124	22.8611	3.06527	-6.78941	1.12594e-11	6.12358e-10	yes
NM_172710	Sel1l3	chr5:53498321-53604691	0.0176234	2.15377	6.93323	-6.78856	1.13261e-11	6.15842e-10	yes
NM_172118	Myl9	chr2:156601199-156607393	0.0205358	67.8621	11.6902	-6.7827	1.17952e-11	6.39551e-10	yes
NM_008935	Prom1	chr5:44384860-44492975	2.62529	24.0375	3.19474	-6.75912	1.38833e-11	7.43246e-10	yes
NM_020576	Psors1c2	chr17:35670145-35671592	0.299622	13.568	5.50092	-6.75325	1.44573e-11	7.72003e-10	yes
NM_010856	Myh6	chr14:55560757-55585444	0.0181923	1.50667	6.37189	-6.74832	1.49563e-11	7.96969e-10	yes
NM_011348	Sema3e	chr5:14025275-14256689	0.308368	4.37561	3.82676	-6.71749	1.84885e-11	9.71245e-10	yes
NM_053099	Setbp1	chr18:78947116-79306130	0.319127	3.83296	3.58625	-6.70181	2.05849e-11	1.0747e-09	yes
NM_011074	Cdk14	chr5:4803384-5380251	0.0900362	2.39153	4.73129	-6.69973	2.08809e-11	1.08862e-09	yes
NM_008626	Mrc2	chr11:105153959-105212459	0.0999257	2.18142	4.44827	-6.69254	2.19329e-11	1.13979e-09	yes
NM_009728	Atp10a	chr7:65913571-66084796	0.544712	6.69142	3.61875	-6.69113	2.21454e-11	1.15007e-09	yes
NM_133769	Cyfip2	chr11:46007350-46126361	1.76585	12.5999	2.83498	-6.68726	2.27383e-11	1.1787e-09	yes
NM_010864	Myo5a	chr9:74919012-75071494	2.1612	10.9056	2.33517	-6.66964	2.5643e-11	1.31935e-09	yes
NM_134117	Pkdcc	chr17:83614622-83624409	0.0785938	3.58282	5.51054	-6.65767	2.78202e-11	1.42332e-09	yes
NM_177784	Klhl23	chr2:69660426-69674708	0.451363	6.18116	3.77552	-6.65765	2.78235e-11	1.42334e-09	yes
NM_175473	Fras1	chr5:96802973-97213747	0.141117	2.00833	3.83103	-6.65077	2.91573e-11	1.48716e-09	yes
NM_153800	Arhgap22	chr14:34030008-34183122	0.3386	6.02908	4.15428	-6.62258	3.52978e-11	1.77798e-09	yes
NM_178254	Tcfl5	chr2:180332926-180377396	3.46202	31.786	3.19871	-6.61714	3.66216e-11	1.84005e-09	yes
NM_019972	Sort1	chr3:108086981-108164437	1.02437	10.4552	3.35142	-6.61529	3.70826e-11	1.86205e-09	yes
NM_025829	Eif4e3	chr6:99575130-99616765	0.0760116	3.43317	5.49718	-6.57154	4.97982e-11	2.45229e-09	yes
NM_011412	Slit3	chr11:34934957-35522009	0.704662	8.0039	3.5057	-6.56654	5.14964e-11	2.53127e-09	yes
NM_022030	Sv2a	chr3:95985149-95999103	0.113529	2.7699	4.60871	-6.54738	5.85534e-11	2.8543e-09	yes
NM_029529	Slc35d3	chr10:19567722-19571265	0.0650193	3.20434	5.62302	-6.53364	6.41922e-11	3.10875e-09	yes
NM_172775	Plxnb1	chr9:108997949-109022429	0.684952	5.92743	3.11333	-6.52789	6.67013e-11	3.2225e-09	yes
NM_009922	Cnn1	chr9:21903696-21913665	0.00958424	11.7492	10.2596	-6.52476	6.81117e-11	3.28472e-09	yes
NR_045820	A930024E05Rik	chr5:123439362-123448350	0.327747	6.50361	4.31058	-6.48656	8.78175e-11	4.16754e-09	yes
NM_001146031	Nrcam	chr12:45429871-45702833	0.145303	2.56316	4.14079	-6.43306	1.25056e-10	5.79619e-09	yes
NM_010345	Grb10	chr11:11830501-11937423	18.5652	82.8298	2.15755	-6.41509	1.40738e-10	6.47141e-09	yes
NM_020493	Srf	chr17:46683787-46693111	4.67207	24.0612	2.36457	-6.40724	1.48176e-10	6.79208e-09	yes
NM_001277268	Fgf5	chr5:98683202-98706052	0.155732	5.94606	5.2548	-6.39459	1.60975e-10	7.32719e-09	yes
NM_021451	Pmaip1	chr18:66618257-66625212	1.87813	17.1143	3.18784	-6.38375	1.72805e-10	7.82288e-09	yes
NM_001017427	Rasef	chr4:73360482-73436506	0.0236788	1.6923	6.15924	-6.37488	1.8311e-10	8.24702e-09	yes
NM_009865	Cdh10	chr15:18750083-18943989	0.0231859	2.49211	6.74798	-6.36897	1.90306e-10	8.54854e-09	yes
NM_001111016	Nav2	chr7:56214442-56865458	0.267511	4.5129	4.07638	-6.36199	1.99159e-10	8.91717e-09	yes
NM_019511	Ramp3	chr11:6550150-6577478	0.191686	6.95121	5.18044	-6.34581	2.21257e-10	9.8408e-09	yes
NM_001167860	Wipf3	chr6:54402876-54453762	0.102212	2.251	4.46093	-6.31967	2.62131e-10	1.15122e-08	yes
NM_177900	Hapln4	chr8:72607427-72614761	0.0637256	2.4123	5.24239	-6.31643	2.67671e-10	1.17406e-08	yes
NM_144891	Gdap1l1	chr2:163264202-163281060	0.0865954	3.32741	5.26397	-6.31568	2.68969e-10	1.179e-08	yes
NM_175234	Faxc	chr4:21858472-21928608	0.0904753	1.45805	4.01037	-6.3014	2.94966e-10	1.28351e-08	yes
NM_175429	Kctd12b	chrX:150119696-150130823	0.0739379	2.06814	4.80587	-6.2814	3.35542e-10	1.44392e-08	yes
NM_011020	Hspa4l	chr3:40549534-40594287	0.492376	6.25602	3.66741	-6.27646	3.46374e-10	1.48737e-08	yes
NM_013691	Thbs3	chr3:89019108-89030759	0.404238	5.51471	3.77001	-6.26768	3.66476e-10	1.56948e-08	yes
NM_133974	Cdcp1	chr9:123081402-123125156	0.184618	3.14332	4.08968	-6.26473	3.7346e-10	1.5974e-08	yes
NM_175096	Stbd1	chr5:93032076-93035605	0.0375853	3.55911	6.56521	-6.25843	3.88883e-10	1.65734e-08	yes
NM_146040	Cdca7l	chr12:119082333-119437516	4.4513	27.0448	2.60305	-6.25613	3.94648e-10	1.67924e-08	yes
NM_053248	Slc5a5	chr8:73406787-73416656	0.0761673	3.15414	5.37193	-6.2387	4.41223e-10	1.86426e-08	yes
NM_145548	Cyp2j13	chr4:95709350-95744231	0.016633	1.48857	6.48374	-6.23735	4.45051e-10	1.87846e-08	yes
NM_011214	Ptpru	chr4:131324371-131394193	0.150077	2.31395	3.94658	-6.2303	4.6555e-10	1.95876e-08	yes
NM_001206851	Usp44	chr10:93294299-93320832	1.77621	17.8085	3.32569	-6.21115	5.25969e-10	2.19389e-08	yes
NM_009929	Col18a1	chr10:76514923-76629275	17.706	72.8655	2.041	-6.20853	5.34818e-10	2.22907e-08	yes
NM_010570	Irs1	chr1:82229679-82288014	0.442385	4.20786	3.24971	-6.20338	5.52642e-10	2.29701e-08	yes
NM_009502	Vcl	chr14:21748654-21852895	16.9525	68.491	2.01442	-6.19562	5.80555e-10	2.40515e-08	yes
NM_028584	Marveld3	chr8:112471808-112486105	0.179002	4.8497	4.75985	-6.18936	6.04085e-10	2.49662e-08	yes
NM_010513	Igf1r	chr7:75097142-75378553	1.23503	6.41934	2.37788	-6.16161	7.20101e-10	2.93785e-08	yes
NR_001592	H19	chr7:149761436-149764051	0.0499438	2.35797	5.5611	-6.14239	8.12914e-10	3.28758e-08	yes
NM_001083114	Pphln1	chr15:93228780-93322343	2.96302	24.7013	3.05944	-6.12926	8.82899e-10	3.5486e-08	yes
NM_021567	Pcbp4	chr9:106356168-106368271	15.5689	68.3708	2.13471	-6.11999	9.35802e-10	3.74314e-08	yes
NM_009662	Alox5	chr6:116360088-116411196	0.0941946	2.89314	4.94085	-6.11835	9.4547e-10	3.77711e-08	yes
NM_001081047	Cnksr1	chr4:133783956-133794314	0.0449264	2.41251	5.74683	-6.1006	1.05672e-09	4.18756e-08	yes
NM_009931	Col4a1	chr8:11198422-11312826	0.658925	5.76677	3.12958	-6.08721	1.14897e-09	4.53081e-08	yes
NM_152923	Kcnq3	chr15:65826476-66117786	0.0257801	2.06925	6.32671	-6.08209	1.18627e-09	4.66567e-08	yes
NM_019990	Stard10	chr7:108469832-108494826	1.42272	17.3295	3.6065	-6.0807	1.19656e-09	4.70192e-08	yes
NM_028980	Ppp4r4	chr12:104770774-104852042	0.486194	6.17868	3.66769	-6.07461	1.24291e-09	4.87018e-08	yes
NM_178695	Prrg4	chr2:104670897-104690007	4.48151	24.3529	2.44204	-6.07144	1.26772e-09	4.96095e-08	yes
NM_013886	Hdgfrp3	chr7:89003886-89079345	0.434021	5.04808	3.5399	-6.06533	1.31684e-09	5.13857e-08	yes
NM_178675	Slc35f1	chr10:52410306-52831428	0.0254868	1.14197	5.48563	-6.06048	1.35714e-09	5.28557e-08	yes
NM_021509	Moxd1	chr10:23943322-24022589	0.0286966	2.92233	6.6701	-6.05679	1.38864e-09	5.39823e-08	yes
NM_001197322	Foxp1	chr6:98875335-99385339	0.3431	6.71328	4.29032	-6.05612	1.39442e-09	5.41938e-08	yes
NM_146062	Pphln1	chr15:93228780-93322343	1.39309	22.5459	4.0165	-6.05346	1.41766e-09	5.50394e-08	yes
NM_025961	Gatm	chr2:122420208-122437013	0.107291	2.84905	4.73088	-6.04582	1.48649e-09	5.75451e-08	yes
NM_027450	Glipr2	chr4:43970573-43991990	9.33188	44.4342	2.25143	-6.04269	1.51565e-09	5.85703e-08	yes
NM_001112744	Arhgef16	chr4:153652578-153674004	0.596466	7.32438	3.6182	-6.04243	1.51813e-09	5.86426e-08	yes
NM_011785	Akt3	chr1:178952245-179178898	1.79959	11.3435	2.65613	-6.03773	1.56296e-09	6.02392e-08	yes
NM_177638	Crb3	chr17:57201699-57205337	4.16707	35.7813	3.1021	-6.03475	1.59206e-09	6.12826e-08	yes
NM_008240	Foxj1	chr11:116192017-116196668	0.15033	3.03357	4.33481	-6.02726	1.66758e-09	6.39595e-08	yes
NM_001042528	Cacna1b	chr2:24459408-24618672	0.0301678	0.817661	4.76042	-6.02242	1.7183e-09	6.57691e-08	yes
NM_009678	Ap1m2	chr9:21099900-21116777	4.5488	33.9277	2.89891	-6.01633	1.78417e-09	6.8085e-08	yes
NM_018804	Syt11	chr3:88548622-88576521	0.422774	4.70766	3.47705	-6.00114	1.95942e-09	7.43025e-08	yes
NM_133897	Lrrc8c	chr5:105948489-106037973	0.243845	4.29893	4.13994	-5.99786	1.9994e-09	7.56736e-08	yes
NM_172383	Tmem125	chr4:118213545-118216331	0.113618	3.76958	5.05214	-5.99062	2.09046e-09	7.88316e-08	yes
NM_023270	Rnf128	chrX:136097878-136207684	0.656824	8.04997	3.6154	-5.98995	2.09908e-09	7.91257e-08	yes
NM_173016	Vat1l	chr8:116729539-116897970	0.021941	2.6957	6.94088	-5.98101	2.21759e-09	8.32678e-08	yes
NM_009308	Syt4	chr18:31597461-31607069	0.0872917	2.1177	4.60051	-5.97854	2.25143e-09	8.4446e-08	yes
NM_175930	Rapgef5	chr12:118754951-118995451	1.1692	9.59763	3.03716	-5.97536	2.29581e-09	8.59078e-08	yes
NM_013779	Magel2	chr7:69521864-69526526	0.0254601	1.16232	5.51263	-5.97245	2.3371e-09	8.73132e-08	yes
NM_020510	Fzd2	chr11:102465744-102469372	0.748373	8.08382	3.43321	-5.96404	2.46082e-09	9.15736e-08	yes
NM_010361	Gstt2	chr10:75294589-75297626	5.11497	38.2049	2.90096	-5.95174	2.65306e-09	9.80918e-08	yes
NM_145152	Lrrc3	chr10:77360319-77365281	0.118483	1.98009	4.06282	-5.92927	3.04277e-09	1.11441e-07	yes
NM_001110252	Hpn	chr7:31883743-31900345	0.238188	4.42902	4.21681	-5.91768	3.26511e-09	1.18899e-07	yes
NM_008343	Igfbp3	chr11:7106095-7113926	1.83873	15.9038	3.11259	-5.90809	3.46101e-09	1.25539e-07	yes
NM_199449	Zhx2	chr15:57526221-57671387	0.122218	2.15612	4.14091	-5.90634	3.498e-09	1.26814e-07	yes
NM_146227	Prss50	chr9:110760470-110767132	0.150909	4.3508	4.84953	-5.87196	4.30682e-09	1.53756e-07	yes
NM_001080820	Cass4	chr2:172219293-172259257	0.0455318	1.89759	5.38115	-5.87135	4.3225e-09	1.54224e-07	yes
NM_001114088	Pdlim7	chr13:55598847-55614807	1.23642	16.7107	3.75653	-5.86297	4.54668e-09	1.61625e-07	yes
NM_007726	Cnr1	chr4:34011606-34035806	0.0460432	1.04479	4.50408	-5.86055	4.61338e-09	1.63779e-07	yes
NM_019813	Dbn1	chr13:55574788-55589437	0.613129	7.82735	3.67426	-5.84877	4.95217e-09	1.74723e-07	yes
NM_172632	Mapk4	chr18:74088140-74224603	2.35794	12.6765	2.42656	-5.84326	5.11885e-09	1.80094e-07	yes
NM_001001892	H2-K1	chr17:34132956-34137278	5.18478	31.6491	2.60981	-5.83441	5.39817e-09	1.88949e-07	yes
NM_025944	Tmem246	chr4:49597377-49610742	0.101625	2.13225	4.39106	-5.82884	5.58137e-09	1.94817e-07	yes
NM_011653	Tuba1a	chr15:98780277-98783932	35.5127	132.494	1.89952	-5.82473	5.72041e-09	1.99238e-07	yes
NM_199017	9230110C19Rik	chr9:8021671-8042823	1.21227	12.7682	3.39677	-5.82423	5.73759e-09	1.99779e-07	yes
NM_173731	Hmgcll1	chr9:75862783-75984157	0.106077	1.93002	4.18544	-5.82114	5.84492e-09	2.03179e-07	yes
NR_034155	Olfr1372-ps1	chr11:51968377-51971409	0.149239	3.60063	4.59255	-5.79683	6.75808e-09	2.32194e-07	yes
NM_008009	Fgfbp1	chr5:44370096-44373038	0.839894	11.204	3.73767	-5.78641	7.19067e-09	2.45726e-07	yes
NR_028380	Ftx	chrX:100756248-100819093	0.389152	5.6289	3.85445	-5.77134	7.86445e-09	2.67011e-07	yes
NM_138956	Rassf3	chr10:120847406-120913306	2.25052	13.7488	2.61097	-5.77087	7.88626e-09	2.67676e-07	yes
NM_011360	Sgce	chr6:4624349-4697204	0.394742	6.57337	4.05765	-5.77067	7.89575e-09	2.67961e-07	yes
NM_008057	Fzd7	chr1:59538990-59543799	8.20483	31.3083	1.932	-5.76804	8.01994e-09	2.71774e-07	yes
NM_025831	Pxdc1	chr13:34719709-34744550	0.018761	6.83527	8.50912	-5.75226	8.80575e-09	2.96548e-07	yes
NM_019993	Aldh9a1	chr1:169280121-169298661	10.9056	42.6538	1.96761	-5.74694	9.08704e-09	3.05445e-07	yes
NM_011777	Zyx	chr6:42299826-42330557	0.404663	19.3073	5.57629	-5.74666	9.10212e-09	3.05867e-07	yes
NM_153512	Kcng3	chr17:83985296-84031235	0.124017	2.11205	4.09004	-5.74418	9.23658e-09	3.10148e-07	yes
NM_144549	Trib1	chr15:59480208-59488654	1.12702	8.59455	2.93092	-5.74419	9.23623e-09	3.10148e-07	yes
NM_011898	Spry4	chr18:38745918-38760922	0.293375	3.83648	3.70896	-5.74002	9.46648e-09	3.17249e-07	yes
NM_011213	Ptprf	chr4:117880817-117964002	11.6714	42.9982	1.8813	-5.73656	9.66198e-09	3.23083e-07	yes
NM_207583	Fam5b	chr1:160175399-160286391	0.0265265	2.14838	6.33967	-5.73322	9.85443e-09	3.2913e-07	yes
NM_024223	Crip2	chr12:114378446-114383717	8.18226	42.5877	2.37987	-5.71577	1.09205e-08	3.61732e-07	yes
NM_010346	Grb7	chr11:98308147-98316687	3.56192	20.6678	2.53666	-5.70845	1.1401e-08	3.76328e-07	yes
NM_008867	Pla2r1	chr2:60255599-60391365	0.0450915	0.906493	4.32937	-5.69965	1.20051e-08	3.94623e-07	yes
NM_139198	Plac8	chr5:100982751-101001224	0.0772557	10.9785	7.15082	-5.69561	1.22934e-08	4.03373e-07	yes
NM_013565	Itga3	chr11:94905795-94938028	2.49047	12.6624	2.34606	-5.68568	1.30294e-08	4.25362e-07	yes
NM_145144	Aif1l	chr2:31805822-31828962	0.700997	7.08655	3.3376	-5.66935	1.43344e-08	4.64258e-07	yes
NM_153565	Pcsk9	chr4:106114938-106136930	0.201448	2.59756	3.68867	-5.65962	1.51705e-08	4.88975e-07	yes
NM_029100	Sepn1	chr4:134093806-134108081	0.376803	4.17001	3.46817	-5.64649	1.63761e-08	5.24156e-07	yes
NM_007495	Astn1	chr1:160292434-160621917	0.0234682	0.969788	5.36889	-5.63853	1.71505e-08	5.46947e-07	yes
NM_020604	Jph1	chr1:16985020-17087970	0.391504	3.81765	3.28559	-5.63549	1.74557e-08	5.55725e-07	yes
NM_015795	Fbxo16	chr14:65885537-65940339	0.129559	4.03422	4.96061	-5.62587	1.84571e-08	5.84865e-07	yes
NM_153537	Phldb1	chr9:44494390-44543281	0.437304	3.88527	3.15131	-5.60688	2.06003e-08	6.46702e-07	yes
NM_011063	Pea15a	chr1:174126859-174136912	0.783015	8.03589	3.35935	-5.59801	2.16826e-08	6.77988e-07	yes
NM_172449	Bzrap1	chr11:87574042-87599430	0.0311368	0.70126	4.49326	-5.58661	2.31543e-08	7.20038e-07	yes
NM_009451	Tubb4a	chr17:57219488-57227205	0.0430421	2.00907	5.54463	-5.57923	2.41582e-08	7.49036e-07	yes
NM_001163630	Satb1	chr17:51875511-51972615	0.473665	3.93578	3.05471	-5.57699	2.44718e-08	7.57784e-07	yes
NM_178655	Ank2	chr3:126624524-126701370	0.93514	6.5499	2.80822	-5.57499	2.47542e-08	7.65888e-07	yes
NM_178662	Atcay	chr10:80657435-80693524	0.0375681	1.37097	5.18955	-5.5731	2.50251e-08	7.73626e-07	yes
NM_023196	Pla2g12a	chr3:129581523-129598743	2.84004	21.8256	2.94203	-5.54577	2.92662e-08	8.92324e-07	yes
NM_027721	Katnal2	chr18:77231938-77286035	0.31917	4.46491	3.80624	-5.54087	3.00964e-08	9.15555e-07	yes
NM_173428	Sspo	chr6:48398227-48451249	0.00506726	0.247281	5.6088	-5.52388	3.31602e-08	1.00011e-06	yes
NM_023672	Ssbp3	chr4:106584074-106722299	4.11715	22.1664	2.42866	-5.51226	3.5425e-08	1.0633e-06	yes
NM_206882	Hist3h2bb-ps	chr11:58767549-58768014	5.40793	52.2225	3.27153	-5.50663	3.65771e-08	1.09526e-06	yes
NM_001004176	Maml3	chr3:51491534-51908928	0.0161027	0.626934	5.28294	-5.50345	3.7242e-08	1.11348e-06	yes
NM_178749	Stk32a	chr18:43367350-43477135	0.142779	1.89546	3.7307	-5.49533	3.8998e-08	1.16101e-06	yes
NM_199465	Nexn	chr3:151899947-151929284	0.0476597	1.62622	5.09261	-5.49482	3.91104e-08	1.16414e-06	yes
NM_001198823	App	chr16:84954680-85173952	1.34316	13.9261	3.37409	-5.48575	4.11716e-08	1.2203e-06	yes
NM_001040459	Shroom4	chrX:5977262-6210835	0.341306	3.37508	3.30578	-5.48316	4.17792e-08	1.23641e-06	yes
NM_001081252	Uggt2	chr14:119384206-119498656	0.173409	1.80491	3.37967	-5.47738	4.31676e-08	1.27398e-06	yes
NM_007863	Mpp3	chr11:101860966-101888269	0.0592109	1.55714	4.7169	-5.47473	4.38172e-08	1.29181e-06	yes
NM_052994	Spock2	chr10:59569004-59596661	0.699259	5.76944	3.04453	-5.46596	4.60413e-08	1.35299e-06	yes
NM_133979	Ano10	chr9:122084991-122203541	0.619256	6.02681	3.28279	-5.4634	4.67088e-08	1.37094e-06	yes
NM_011353	Serf1	chr13:100877973-100884188	0.8165	12.9096	3.98285	-5.45892	4.7905e-08	1.40357e-06	yes
NM_009869	Cdh9	chr15:16707855-16786532	0.0215712	1.46569	6.08633	-5.45383	4.92956e-08	1.4402e-06	yes
NM_008909	Ppl	chr16:5086383-5132574	0.206804	2.02464	3.29132	-5.44754	5.10716e-08	1.48857e-06	yes
NM_023622	Rgl3	chr9:21775970-21793897	0.00732869	2.78608	8.57046	-5.42572	5.77215e-08	1.6641e-06	yes
NM_011055	Pde3b	chr7:121558767-121681451	1.05494	6.56806	2.63831	-5.41872	6.00258e-08	1.72651e-06	yes
NM_023158	Cxcl16	chr11:70267735-70279701	0.122204	2.59252	4.40699	-5.41411	6.1596e-08	1.76661e-06	yes
NM_009794	Capn2	chr1:184397389-184447614	1.19065	8.58539	2.85013	-5.40586	6.44989e-08	1.8421e-06	yes
NM_010111	Efnb2	chr8:8617438-8660773	0.651568	5.27304	3.01665	-5.40388	6.5214e-08	1.86086e-06	yes
NM_009154	Sema5a	chr15:32174567-32626096	0.0742364	0.824995	3.47419	-5.40164	6.60343e-08	1.88249e-06	yes
NM_011670	Uchl1	chr5:67017733-67078473	17.666	70.7346	2.00144	-5.39683	6.783e-08	1.92901e-06	yes
NM_207625	Acsl4	chrX:138752535-138825078	3.25858	16.2775	2.32056	-5.37425	7.69003e-08	2.1652e-06	yes
NM_001081009	Parp8	chr13:117643630-117814323	0.0722902	1.46918	4.34507	-5.36711	8.00091e-08	2.24284e-06	yes
NM_009898	Coro1a	chr7:133843287-133848330	0.678867	7.00179	3.36652	-5.36688	8.01123e-08	2.24494e-06	yes
NM_172525	Arhgap29	chr3:121656243-121719071	0.965093	6.22312	2.6889	-5.36205	8.22849e-08	2.29968e-06	yes
NM_008102	Gch1	chr14:47773569-47809077	0.309516	3.37099	3.44509	-5.35816	8.40745e-08	2.34481e-06	yes
NM_009621	Adamts1	chr16:85794072-85803360	0.0267508	0.838681	4.97047	-5.34913	8.83773e-08	2.45346e-06	yes
NM_008985	Ptprn	chr1:75243615-75260783	0.121781	1.6847	3.79013	-5.34791	8.8977e-08	2.46841e-06	yes
NM_001111311	Lrrfip1	chr1:92895303-93025521	1.12065	9.82557	3.1322	-5.34347	9.11831e-08	2.52351e-06	yes
NM_011517	Sycp3	chr10:87922331-87966715	5.58423	54.3387	3.28255	-5.32865	9.89448e-08	2.7165e-06	yes
NM_001170694	Rcbtb2	chr14:73542316-73583861	2.66546	15.8078	2.56817	-5.32811	9.92397e-08	2.72334e-06	yes
NM_175296	Mael	chr1:168131515-168168875	0.96973	9.34118	3.26795	-5.32367	1.01693e-07	2.78482e-06	yes
NM_011896	Spry1	chr3:37538871-37543521	2.80017	15.6335	2.48106	-5.32167	1.02817e-07	2.81289e-06	yes
NM_001082483	Efr3b	chr12:3962553-4038915	0.317001	2.66272	3.07034	-5.31503	1.06642e-07	2.90746e-06	yes
NM_001001491	Tpm4	chr8:74659190-74677028	32.3788	105.541	1.70468	-5.31021	1.09497e-07	2.97656e-06	yes
NM_010801	Mlf1	chr3:67178018-67203922	0.292727	5.66155	4.27357	-5.30756	1.11104e-07	3.01632e-06	yes
NM_010848	Myb	chr10:20844735-20880790	0.729078	8.64984	3.56853	-5.30708	1.11398e-07	3.02346e-06	yes
NM_021284	Kras	chr6:145165218-145198751	9.31834	31.0817	1.73792	-5.3028	1.14038e-07	3.08835e-06	yes
NM_026346	Fbxo32	chr15:58007433-58046447	0.0174703	0.550393	4.97749	-5.30057	1.15441e-07	3.12388e-06	yes
NM_172588	Serinc5	chr13:93381092-93481901	3.90861	14.7293	1.91397	-5.29735	1.17496e-07	3.17325e-06	yes
NM_144783	Wt1	chr2:104966685-105013771	0.017925	1.14046	5.99151	-5.29562	1.18613e-07	3.20145e-06	yes
NM_181595	Ppp1r9a	chr6:4853319-5115661	1.14412	5.28515	2.2077	-5.29219	1.20861e-07	3.25902e-06	yes
NM_019958	Rgs17	chr10:4424140-4520877	0.0180711	0.487142	4.75259	-5.29131	1.21446e-07	3.27387e-06	yes
NM_175136	Rnf122	chr8:32222317-32241945	0.294746	2.98661	3.34097	-5.28788	1.23744e-07	3.33136e-06	yes
NM_008756	Ocln	chr13:101267321-101322453	1.77039	10.5865	2.58009	-5.28156	1.28091e-07	3.439e-06	yes
NM_001159507	Grip2	chr6:91711502-91757387	0.0230035	0.688702	4.90395	-5.28126	1.283e-07	3.4444e-06	yes
NM_001081441	Wdr86	chr5:24218086-24236498	0.710417	8.10987	3.51294	-5.27846	1.30273e-07	3.49291e-06	yes
NM_145512	Sft2d2	chr1:167104471-167124564	2.8772	11.686	2.02204	-5.26131	1.43029e-07	3.80545e-06	yes
NM_146258	Stard13	chr5:151840089-151992768	0.0464771	0.94311	4.34284	-5.24301	1.57977e-07	4.16921e-06	yes
NM_008940	Klk8	chr7:51052946-51059192	0.844523	8.14891	3.2704	-5.23338	1.66437e-07	4.37214e-06	yes
NM_001042725	Calcr	chr6:3635719-3714713	0.0324371	1.63173	5.65261	-5.22631	1.72928e-07	4.52785e-06	yes
NM_139206	Arap3	chr18:38132276-38158623	0.0170147	0.707037	5.37694	-5.22062	1.78325e-07	4.65653e-06	yes
NM_133729	2610018G03Rik	chrX:48194612-48245027	1.65177	11.7456	2.83003	-5.22058	1.78362e-07	4.65697e-06	yes
NM_008973	Ptn	chr6:36665662-36761361	0.0231343	1.77238	6.25951	-5.22049	1.78452e-07	4.65857e-06	yes
NM_172486	Zfp677	chr17:21520711-21536229	0.222567	2.46388	3.46862	-5.21827	1.806e-07	4.70853e-06	yes
NM_145066	Gpr85	chr6:13785073-13789848	0.0834421	1.46209	4.13111	-5.21401	1.848e-07	4.80737e-06	yes
NM_016669	Crym	chr7:127329897-127345502	0.405699	6.57787	4.01914	-5.21147	1.87355e-07	4.86885e-06	yes
NM_007866	Dll3	chr7:29078573-29086804	0.306804	3.45613	3.49377	-5.19138	2.08738e-07	5.36587e-06	yes
NM_177572	Rimkla	chr4:119137890-119165203	0.237443	2.39677	3.33544	-5.18907	2.11353e-07	5.42584e-06	yes
NM_008185	Gstt1	chr10:75246557-75261329	0.323909	5.61843	4.11651	-5.183	2.18344e-07	5.58927e-06	yes
NM_010321	Gnmt	chr17:46862612-46866114	0.470409	5.99876	3.67267	-5.18291	2.18448e-07	5.59134e-06	yes
NM_016778	Bok	chr1:95582270-95592339	1.94684	14.3968	2.88654	-5.16512	2.40283e-07	6.09458e-06	yes
NM_001039387	Nsmf	chr2:24909898-24918401	0.0986269	4.11047	5.38118	-5.15718	2.50698e-07	6.33775e-06	yes
NM_029444	4930447C04Rik	chr12:73982095-74018752	0.320932	4.13597	3.68788	-5.15693	2.51035e-07	6.34429e-06	yes
NM_015819	Hs6st2	chrX:48739813-49034779	0.0246204	0.981934	5.3177	-5.15567	2.5273e-07	6.38143e-06	yes
NM_001164804	Coro2a	chr4:46549808-46614801	0.00724433	2.47907	8.41873	-5.15075	2.59443e-07	6.53725e-06	yes
NM_008516	Lrrn1	chr6:107479719-107520222	0.138097	1.64102	3.57084	-5.15049	2.59803e-07	6.54489e-06	yes
NM_007599	Capg	chr6:72494384-72512977	3.13193	27.0567	3.11086	-5.14813	2.63097e-07	6.61411e-06	yes
NM_010112	Efs	chr14:55535379-55545625	0.982617	6.66608	2.76214	-5.14493	2.67615e-07	6.71963e-06	yes
NM_153422	Pde5a	chr3:122432075-122562292	1.01515	5.32326	2.39062	-5.14365	2.69454e-07	6.76019e-06	yes
NM_011595	Timp3	chr10:85511490-85961641	0.215278	3.23349	3.90882	-5.13986	2.74941e-07	6.88638e-06	yes
NM_016908	Syt5	chr7:4491366-4498169	0.130304	2.34619	4.17036	-5.13525	2.81765e-07	7.04415e-06	yes
NM_007378	Abca4	chr3:121747377-121882979	0.0188492	0.476029	4.65847	-5.13226	2.86285e-07	7.14382e-06	yes
NM_001083312	Gbp7	chr3:142193299-142213115	0.0079155	0.579647	6.19435	-5.12869	2.9177e-07	7.26932e-06	yes
NM_153319	Amot	chrX:141880966-141922182	0.244721	2.10842	3.10695	-5.12247	3.01564e-07	7.49446e-06	yes
NM_177139	Lypd6	chr2:49921948-50049089	0.124858	1.89496	3.9238	-5.117	3.1044e-07	7.69086e-06	yes
NM_010329	Pdpn	chr4:142857311-142889467	3.38195	18.9832	2.48879	-5.09895	3.41537e-07	8.39058e-06	yes
NM_019946	Mgst1	chr6:138089057-138105273	0.385778	7.49046	4.27921	-5.09806	3.43153e-07	8.42641e-06	yes
NM_028493	Rhobtb3	chr13:76006984-76081272	4.55108	15.9482	1.80911	-5.09759	3.44009e-07	8.44573e-06	yes
NM_134160	Mcoln3	chr3:145784754-145803610	0.0122152	5.51978	8.81979	-5.09655	3.45893e-07	8.49024e-06	yes
NM_013845	Ror1	chr4:99768395-100115150	0.296777	3.10103	3.3853	-5.08509	3.67461e-07	8.96673e-06	yes
NM_175122	Rab39b	chrX:72817383-72823570	0.171153	1.83623	3.42339	-5.08257	3.72365e-07	9.074e-06	yes
NM_016705	Kif21a	chr15:90763705-90880382	0.335714	4.44622	3.72727	-5.08252	3.7246e-07	9.07585e-06	yes
NM_080726	Rem2	chr14:55094936-55099271	0.0481746	1.94578	5.33593	-5.07496	3.8758e-07	9.40249e-06	yes
NM_001038602	Marveld2	chr13:101365911-101386926	0.667969	5.19671	2.95975	-5.07312	3.91354e-07	9.48642e-06	yes
NM_172621	Clic5	chr17:44325520-44417117	0.00447807	0.643061	7.16593	-5.0728	3.92012e-07	9.50141e-06	yes
NM_001081062	Ccno	chr13:113778009-113780986	0.440113	4.49402	3.35206	-5.06951	3.98843e-07	9.65097e-06	yes
NM_016696	Gpc1	chr1:94728262-94756773	3.12914	13.5119	2.11039	-5.06502	4.08362e-07	9.8615e-06	yes
NM_001033272	Spata13	chr14:61253565-61383393	1.61784	6.72612	2.0557	-5.06105	4.16956e-07	1.00489e-05	yes
NM_028186	Nkd2	chr13:73956775-73985079	0.103259	1.44764	3.80936	-5.061	4.17064e-07	1.00505e-05	yes
NM_001114332	Slc16a10	chr10:39753340-39862060	0.119494	1.60512	3.74767	-5.05501	4.30358e-07	1.03342e-05	yes
NM_173007	Tspan12	chr6:21721394-21802515	0.117447	1.75302	3.89976	-5.05096	4.39585e-07	1.0539e-05	yes
NM_001081169	Aspg	chr12:113344893-113365784	0.246545	2.65254	3.42745	-5.04084	4.6349e-07	1.10594e-05	yes
NM_021458	Fzd3	chr14:65811277-65881300	0.441021	2.40696	2.44829	-5.04067	4.63899e-07	1.10686e-05	yes
NM_010591	Jun	chr4:94715726-94718913	0.958583	6.54052	2.77043	-5.04016	4.65152e-07	1.10963e-05	yes
NM_013492	Clu	chr14:66587319-66600382	0.602636	6.24369	3.37304	-5.0399	4.65771e-07	1.11077e-05	yes
NM_028386	Asphd2	chr5:112814465-112821233	0.188203	2.94203	3.96645	-5.03275	4.835e-07	1.14852e-05	yes
NM_026135	Kctd16	chr18:40418014-40690838	0.0290441	2.47577	6.41349	-5.03099	4.87957e-07	1.15821e-05	yes
NM_026473	Tubb6	chr18:67550384-67562403	26.7602	83.699	1.64512	-5.02962	4.91456e-07	1.16557e-05	yes
NM_011158	Prkar2b	chr12:32643343-32746144	0.943964	6.25235	2.7276	-5.01793	5.22313e-07	1.23197e-05	yes
NM_008792	Pcsk2	chr2:143361211-143642018	0.0167357	1.00626	5.90994	-5.01754	5.2336e-07	1.23426e-05	yes
NM_026448	Klhl7	chr5:23606407-23667049	3.86668	15.6063	2.01296	-5.01638	5.26536e-07	1.24102e-05	yes
NM_008071	Gabrb3	chr7:64845887-65084171	0.374513	4.34147	3.53509	-5.01492	5.30559e-07	1.24947e-05	yes
NM_178715	Tmem30b	chr12:74644100-74647382	0.371703	3.34115	3.16812	-5.01276	5.36544e-07	1.26214e-05	yes
NM_008449	Kif5c	chr2:49474833-49630298	2.52178	9.21553	1.86963	-5.00779	5.50586e-07	1.29108e-05	yes
NM_183152	Plk5	chr10:79819203-79828234	0.197367	2.39479	3.60095	-5.00327	5.63658e-07	1.31879e-05	yes
NM_027756	Mfap3l	chr8:63111621-63155528	0.151316	2.09565	3.79176	-4.98331	6.25045e-07	1.44857e-05	yes
NM_001122603	Fcgbp	chr7:28856254-28905883	0.0232237	0.423777	4.18964	-4.98074	6.33429e-07	1.46529e-05	yes
NM_010377	Hist1h1t	chr13:23787679-23788414	3.27544	24.4633	2.90086	-4.96803	6.76366e-07	1.5534e-05	yes
NM_016966	Phgdh	chr3:98117093-98143892	32.7564	102.604	1.64723	-4.96751	6.7818e-07	1.55742e-05	yes
NM_029537	Tmem98	chr11:80623916-80635535	1.6701	12.7627	2.93394	-4.96401	6.90539e-07	1.58279e-05	yes
NM_020605	Jph3	chr8:124254458-124314983	0.134667	1.59618	3.56716	-4.96184	6.98272e-07	1.59884e-05	yes
NM_176837	Arhgap18	chr10:26492317-26638454	0.668987	4.73281	2.82265	-4.9543	7.25916e-07	1.65632e-05	yes
NM_177303	Lrrn4	chr2:132694251-132706598	0.792267	5.37077	2.76107	-4.95146	7.36593e-07	1.67814e-05	yes
NM_033563	Klf7	chr1:64082246-64167963	1.193	9.5673	3.00351	-4.94681	7.54404e-07	1.71435e-05	yes
NM_025424	Nenf	chr1:193130675-193141997	2.12671	17.7725	3.06296	-4.94211	7.72818e-07	1.75174e-05	yes
NM_175483	Snx33	chr9:56765006-56776178	0.183745	1.66166	3.17685	-4.93937	7.83755e-07	1.77344e-05	yes
NM_001033550	Lrrc8b	chr5:105844793-105915208	0.542697	4.22112	2.95941	-4.93437	8.04091e-07	1.81503e-05	yes
NM_008067	Gabra3	chrX:69678014-69901585	0.0284288	1.26948	5.48075	-4.93051	8.20164e-07	1.84768e-05	yes
NM_175437	Gsap	chr5:20692084-20797519	0.0973455	1.18622	3.60712	-4.92673	8.36163e-07	1.88021e-05	yes
NM_009182	St8sia3	chr18:64317377-64436834	0.0119241	0.661498	5.79379	-4.92072	8.62267e-07	1.93413e-05	yes
NM_008083	Gap43	chr16:42248673-42340764	0.03067	2.4088	6.29534	-4.92022	8.64472e-07	1.93865e-05	yes
NM_176996	Smo	chr6:29685496-29711366	5.01223	17.4021	1.79574	-4.91732	8.7735e-07	1.96476e-05	yes
NM_172441	Shroom2	chrX:149044051-149204029	3.92449	15.4825	1.98006	-4.91562	8.85024e-07	1.97993e-05	yes
NM_001134741	Tdrd5	chr1:158185425-158233737	0.16548	4.11571	4.63641	-4.90421	9.38029e-07	2.08805e-05	yes
NM_010634	Fabp5	chr3:10012584-10016610	3.92945	25.6848	2.70852	-4.90258	9.45879e-07	2.10358e-05	yes
NM_007528	Bcl6b	chr11:70037628-70043300	0.0561055	0.950337	4.08223	-4.8916	1.00021e-06	2.21287e-05	yes
NM_016875	Ybx2	chr11:69749400-69755101	0.534014	4.77493	3.16053	-4.88939	1.01147e-06	2.23522e-05	yes
NM_027294	Cmtm8	chr9:114698462-114753270	0.172485	3.22505	4.22478	-4.88581	1.03003e-06	2.27229e-05	yes
NM_001160386	Dnah7b	chr1:46123582-46430395	0.0108722	0.230471	4.40586	-4.88373	1.04098e-06	2.2933e-05	yes
NR_003188	Kis2	chrX:50095679-50097770	1.96443	11.9087	2.59984	-4.88185	1.05095e-06	2.31305e-05	yes
NM_178681	Dgkb	chr12:38607291-39359997	0.0393268	0.621744	3.98273	-4.87105	1.11008e-06	2.42945e-05	yes
NM_010360	Gstm5	chr3:107680147-107701603	1.41666	12.6878	3.16288	-4.86708	1.13256e-06	2.47427e-05	yes
NM_026644	Agpat4	chr17:12312149-12412506	2.5994	14.5408	2.48386	-4.86707	1.13264e-06	2.47432e-05	yes
NM_009061	Rgs2	chr1:145846467-145851279	0.0307446	0.872861	4.82735	-4.86537	1.14245e-06	2.49315e-05	yes
NM_172463	Sned1	chr1:95132473-95193025	0.248246	2.08682	3.07146	-4.85596	1.19807e-06	2.60509e-05	yes
NM_026524	Mid1ip1	chrX:10294490-10296828	5.48313	26.2573	2.25965	-4.85308	1.2156e-06	2.63823e-05	yes
NM_028966	Samd4	chr14:47502639-47735836	0.0173341	0.5037	4.86088	-4.84982	1.23576e-06	2.67655e-05	yes
NM_001244916	Sall2	chr14:52930851-52948345	1.42256	8.86707	2.63997	-4.84833	1.24504e-06	2.69472e-05	yes
NM_001145885	Ddx4	chr13:113388540-113442518	0.773538	5.34661	2.78908	-4.83895	1.30528e-06	2.81399e-05	yes
NM_013655	Cxcl12	chr6:117118552-117131386	0.0305772	4.21922	7.10838	-4.83311	1.34414e-06	2.88732e-05	yes
NM_010928	Notch2	chr3:97817460-97954290	3.72785	11.1984	1.58687	-4.83312	1.34412e-06	2.88732e-05	yes
NM_175510	Unc80	chr1:66515020-66745722	0.0191262	0.268895	3.81342	-4.8293	1.37013e-06	2.93662e-05	yes
NM_170599	Igsf11	chr16:38902457-39027270	0.0812549	1.09471	3.75195	-4.82786	1.38011e-06	2.95604e-05	yes
NM_175116	Lpar6	chr14:73595308-73725598	2.00731	18.3883	3.19545	-4.81219	1.49288e-06	3.16669e-05	yes
NM_183027	Ap1s3	chr1:79603450-79668547	0.0430238	1.086	4.65774	-4.81034	1.50673e-06	3.19265e-05	yes
NM_177191	Sycp2	chr2:178080000-178142363	0.0347232	0.654325	4.23604	-4.80997	1.50951e-06	3.19797e-05	yes
NM_170684	Cpne7	chr8:125641273-125659085	0.0546109	1.16219	4.41151	-4.8098	1.51082e-06	3.20045e-05	yes
NM_145986	Fam83f	chr15:80502276-80530855	0.0868627	1.26932	3.86918	-4.80928	1.51477e-06	3.20743e-05	yes
NM_172471	Itih5	chr2:10075169-10178156	0.0368402	0.491982	3.73925	-4.80327	1.56093e-06	3.29388e-05	yes
NM_025730	Lrrk2	chr15:91503654-91646555	0.0306231	0.535676	4.12867	-4.80213	1.56986e-06	3.31013e-05	yes
NM_013640	Psmb10	chr8:108459627-108462292	3.03216	18.7656	2.62967	-4.79957	1.59004e-06	3.34738e-05	yes
NM_019550	Ptbp2	chr3:119421659-119486306	8.68645	27.4906	1.6621	-4.79941	1.59137e-06	3.34961e-05	yes
NM_011067	Per3	chr4:150377763-150418774	0.296075	3.21754	3.44192	-4.79629	1.61629e-06	3.39599e-05	yes
NM_029798	Flywch2	chr17:23913884-23923044	1.92257	16.7006	3.11879	-4.79616	1.61735e-06	3.39752e-05	yes
NM_138653	Bspry	chr4:62141100-62158332	2.00889	12.2011	2.60254	-4.79358	1.63828e-06	3.43606e-05	yes
NM_020267	Trim44	chr2:102140275-102241057	5.23706	16.2377	1.63252	-4.79344	1.63949e-06	3.43815e-05	yes
NM_027990	Lypd6b	chr2:49643205-49804366	0.00892208	2.81776	8.30295	-4.79227	1.64906e-06	3.45596e-05	yes
NM_013914	Snai3	chr8:124978105-124984592	0.238354	2.76027	3.53364	-4.79094	1.65998e-06	3.47629e-05	yes
NM_011639	Trip6	chr5:137751126-137755469	6.17362	25.9091	2.06927	-4.78855	1.67987e-06	3.51337e-05	yes
NM_026138	Soga3	chr10:28863801-28919434	0.296484	2.33979	2.98035	-4.78657	1.69655e-06	3.54473e-05	yes
NM_001164727	Gm10406	chr14:7838628-7859963	0.0390195	1.27019	5.02471	-4.77886	1.76293e-06	3.67006e-05	yes
NM_001039472	Kif21b	chr1:138027977-138074591	0.805408	3.66463	2.18588	-4.77365	1.80913e-06	3.75488e-05	yes
NM_013710	Fgd2	chr17:29497858-29516480	0.146983	1.9803	3.752	-4.76979	1.84419e-06	3.81779e-05	yes
NM_001123327	Qser1	chr2:104594949-104656853	4.72972	13.8802	1.55321	-4.75122	2.02191e-06	4.14022e-05	yes
NM_009144	Sfrp2	chr3:83570242-83578236	4.27536	18.8018	2.13675	-4.74936	2.04058e-06	4.17473e-05	yes
NM_008113	Arhgdig	chr17:26336127-26338295	1.56815	11.4613	2.86964	-4.74612	2.0736e-06	4.23527e-05	yes
NM_001135149	Slc39a8	chr3:135488242-135551536	0.038496	0.938776	4.608	-4.74059	2.13099e-06	4.34054e-05	yes
NM_175347	Srl	chr16:4480227-4523053	2.03637	8.33972	2.034	-4.73921	2.14554e-06	4.36612e-05	yes
NM_001033668	Dnah1	chr14:32073560-32137082	0.0212046	0.267087	3.65486	-4.73668	2.17251e-06	4.41638e-05	yes
NM_011530	Tap2	chr17:34341423-34353266	0.095864	1.35142	3.81734	-4.73289	2.21345e-06	4.49068e-05	yes
NM_001166453	Pls3	chrX:73030992-73120509	8.07876	26.5402	1.71597	-4.73125	2.2314e-06	4.5231e-05	yes
NM_001162977	Megf6	chr4:153544821-153649830	0.150415	1.297	3.10815	-4.72681	2.28071e-06	4.61337e-05	yes
NM_172673	Frmd5	chr2:121371264-121632793	0.399464	2.89412	2.85699	-4.72181	2.33754e-06	4.71895e-05	yes
NM_001162926	Fam84b	chr15:60650550-60662955	1.50643	6.97652	2.21137	-4.71723	2.39082e-06	4.81289e-05	yes
NM_018733	Scn1a	chr2:66108838-66278894	0.00530346	0.272322	5.68224	-4.71643	2.40023e-06	4.83022e-05	yes
NM_030719	Gatsl2	chr5:134575617-134617628	0.404362	2.81305	2.79841	-4.71048	2.47133e-06	4.95717e-05	yes
NM_178747	Gulo	chr14:66605623-66628047	0.608189	4.55181	2.90385	-4.70927	2.48602e-06	4.98331e-05	yes
NM_001164805	Thsd7a	chr6:12261607-12699253	0.0439757	0.462329	3.39414	-4.70925	2.4863e-06	4.98366e-05	yes
NM_011787	Amfr	chr8:96495487-96536540	5.42736	17.9832	1.72833	-4.70488	2.54012e-06	5.07698e-05	yes
NM_178411	Zfp334	chr2:165202935-165213759	0.85853	4.6077	2.42411	-4.69489	2.66754e-06	5.30289e-05	yes
NM_001166064	Syde2	chr3:145650833-145684684	1.99452	7.75273	1.95866	-4.69466	2.67053e-06	5.3075e-05	yes
NM_001113384	Gnao1	chr8:96334737-96493288	0.0141942	0.495218	5.12469	-4.69391	2.68027e-06	5.32402e-05	yes
NM_177224	Chd9	chr8:93352733-93578407	5.29616	15.0514	1.50688	-4.67609	2.92396e-06	5.75687e-05	yes
NM_010921	Nkx3-1	chr14:69808748-69812715	0.0389772	0.826832	4.40689	-4.67191	2.98411e-06	5.86165e-05	yes
NM_133810	Stk17b	chr1:53812355-53842059	4.64178	16.2381	1.80663	-4.67145	2.99087e-06	5.87373e-05	yes
NM_027402	Fndc5	chr4:128814303-128821837	0.0783932	1.121	3.83792	-4.66906	3.02586e-06	5.93255e-05	yes
NM_001177352	Myc	chr15:61816895-61821916	0.595258	7.45633	3.64688	-4.6686	3.03262e-06	5.94388e-05	yes
NM_001163575	Parp10	chr15:76063424-76073870	0.702021	4.98831	2.82896	-4.66681	3.05914e-06	5.99123e-05	yes
NM_008478	L1cam	chrX:71099118-71126173	0.0500858	0.759781	3.92311	-4.6602	3.15896e-06	6.16844e-05	yes
NM_001163589	Prph	chr15:98885604-98889409	0.356527	4.49226	3.65536	-4.64648	3.37652e-06	6.549e-05	yes
NM_020505	Vav3	chr3:109143600-109488612	0.0797819	0.860817	3.43157	-4.64288	3.43592e-06	6.65215e-05	yes
NM_013470	Anxa3	chr5:97222403-97274987	0.373621	3.74809	3.32651	-4.64182	3.45353e-06	6.6825e-05	yes
NM_172696	Inadl	chr4:98062516-98386294	0.659354	5.05641	2.93899	-4.63879	3.50457e-06	6.7693e-05	yes
NM_010770	Matn3	chr12:8954734-8978834	0.354497	2.64077	2.89711	-4.63841	3.51094e-06	6.78054e-05	yes
NM_001163567	Fam102b	chr3:108773914-108830525	0.291391	2.14158	2.87764	-4.63504	3.56861e-06	6.87979e-05	yes
NM_011066	Per2	chr1:93312558-93355905	0.0317816	0.477436	3.90904	-4.63226	3.61702e-06	6.96198e-05	yes
NM_001001985	Nat8l	chr5:34338632-34348565	0.111742	0.9731	3.12242	-4.63184	3.62432e-06	6.97437e-05	yes
NM_010228	Flt1	chr5:148373771-148537564	0.0103749	0.378173	5.18788	-4.62828	3.68721e-06	7.08302e-05	yes
NM_009660	Alox15	chr11:70157648-70165533	0.0275171	0.919764	5.06286	-4.62373	3.76908e-06	7.22526e-05	yes
NM_001252330	Slc6a15	chr10:102830441-102882013	2.19677	9.42424	2.10099	-4.62313	3.77986e-06	7.24362e-05	yes
NM_175271	Lpar4	chrX:104115963-104129238	0.762727	4.49796	2.56003	-4.62213	3.79819e-06	7.27527e-05	yes
NM_130448	Pcdh18	chr3:49547217-49561238	0.00349927	0.562684	7.32913	-4.62194	3.80159e-06	7.2815e-05	yes
NM_033327	Zfp423	chr8:90185708-90483494	0.387968	2.62978	2.76093	-4.62168	3.80645e-06	7.28995e-05	yes
NM_009382	Thy1	chr9:43851466-43856662	0.551971	4.8564	3.13722	-4.61875	3.86065e-06	7.38055e-05	yes
NM_145584	Spon1	chr7:120909511-121186889	0.00133945	1.98331	10.5321	-4.61535	3.92439e-06	7.48816e-05	yes
NM_207206	Lpcat4	chr2:112079997-112087268	1.99708	11.0179	2.46388	-4.61092	4.00895e-06	7.63501e-05	yes
NM_134065	Epdr1	chr13:19683576-19711699	2.09928	10.5648	2.3313	-4.60745	4.07639e-06	7.74755e-05	yes
NM_153546	Mboat1	chr13:30228358-30338563	0.161327	1.86883	3.53408	-4.60126	4.1994e-06	7.95345e-05	yes
NM_001085499	Gm595	chrX:46194642-46230890	0.0420089	1.27661	4.92548	-4.59602	4.3063e-06	8.13387e-05	yes
NM_178395	Zdhhc2	chr8:41509168-41570196	1.81415	9.35771	2.36686	-4.59569	4.31311e-06	8.14482e-05	yes
NM_028325	Zcchc12	chrX:33735898-33739153	0.0776803	1.22429	3.97826	-4.59203	4.38958e-06	8.274e-05	yes
NR_028261	Rian	chr12:110842154-110899921	49.7024	144.509	1.53977	-4.59025	4.42719e-06	8.33773e-05	yes
NM_027117	Klhdc2	chr12:70397667-70411674	15.436	46.4635	1.5898	-4.59021	4.42799e-06	8.33891e-05	yes
NM_020283	B3galt1	chr2:67942728-67960939	0.0444376	0.569283	3.67929	-4.58199	4.60569e-06	8.6321e-05	yes
NM_001113412	Fggy	chr4:95224197-95593630	2.86826	14.1623	2.30381	-4.5728	4.81251e-06	8.98239e-05	yes
NM_026580	Otub2	chr12:104615103-104644560	1.31104	7.62212	2.53948	-4.57111	4.85154e-06	9.04648e-05	yes
NM_001003953	Kdm2b	chr5:123320680-123439108	3.94918	19.1272	2.276	-4.57008	4.87543e-06	9.08611e-05	yes
NM_011674	Ugt8a	chr3:125568260-125641468	0.772405	4.65882	2.59253	-4.56992	4.879e-06	9.09241e-05	yes
NM_054053	Gpr98	chr13:81234066-81772143	0.369806	1.61156	2.12361	-4.5696	4.88654e-06	9.10259e-05	yes
NM_009741	Bcl2	chr1:108434754-108610867	0.0205465	0.89668	5.44763	-4.55679	5.19422e-06	9.60785e-05	yes
NM_025437	Eif1ax	chrX:155810126-155823631	69.7666	194.006	1.47549	-4.53742	5.69454e-06	0.000104293	yes
NM_175506	Adamts19	chr18:58996417-59213332	0.042459	0.577618	3.76598	-4.53705	5.7047e-06	0.000104447	yes
NM_001271409	Sorbs3	chr14:70580274-70607478	0.144996	1.97907	3.77074	-4.53562	5.74347e-06	0.000105066	yes
NM_016711	Tmod2	chr9:75413428-75459132	0.280896	1.82573	2.70036	-4.5335	5.80142e-06	0.000106001	yes
NM_144808	Slc39a14	chr14:70703273-70751231	0.241865	5.18418	4.42184	-4.53217	5.8381e-06	0.000106607	yes
NM_133674	Arhgef5	chr6:43215642-43239319	0.341985	2.27209	2.73202	-4.52732	5.97366e-06	0.000108842	yes
NM_010487	Elavl3	chr9:21819448-21856467	0.0873004	0.828276	3.24605	-4.52593	6.01296e-06	0.000109468	yes
NM_177226	Zfp629	chr7:134750548-134757947	0.743684	3.68309	2.30815	-4.51658	6.28466e-06	0.000113907	yes
NM_001080930	Atxn1l	chr8:112250350-112261639	1.92221	6.48681	1.75475	-4.51506	6.32991e-06	0.000114637	yes
NM_029464	Tex26	chr5:150242280-150273195	0.102205	2.15481	4.39802	-4.514	6.36176e-06	0.000115157	yes
NM_001101464	Foxi3	chr6:70906599-70911060	0.176267	3.94007	4.48238	-4.51	6.48276e-06	0.000117102	yes
NM_009208	Slc4a3	chr1:75542840-75556006	0.173457	1.32337	2.93156	-4.50752	6.55902e-06	0.000118328	yes
NM_029555	Gstk1	chr6:42195933-42200440	0.723466	6.07212	3.0692	-4.50307	6.69779e-06	0.000120602	yes
NM_027444	Bbx	chr16:50191956-50432502	3.83075	10.8383	1.50044	-4.49534	6.94574e-06	0.000124555	yes
NM_133485	Ppp1r14c	chr10:6881565-6980391	0.03548	1.13393	4.99818	-4.48913	7.15136e-06	0.000127886	yes
NM_023663	Ripk4	chr16:97963548-97985362	2.48138	9.78492	1.97942	-4.48558	7.27145e-06	0.000129735	yes
NM_001113181	Gria4	chr9:4417892-4796234	0.139658	2.76224	4.30587	-4.48224	7.38643e-06	0.000131582	yes
NM_023047	Dpysl5	chr5:31014267-31101742	0.870388	4.46295	2.35827	-4.47951	7.48136e-06	0.000133087	yes
NM_011894	Sh3bp5	chr14:32187149-32249219	0.132205	1.37875	3.38251	-4.47716	7.56415e-06	0.000134395	yes
NM_133983	Cd276	chr9:58372106-58388747	3.06717	11.6556	1.92604	-4.47347	7.6959e-06	0.00013642	yes
NM_008125	Gjb2	chr14:57717438-57723539	0.134411	1.92731	3.84186	-4.46861	7.87282e-06	0.000139214	yes
NM_144797	Metrnl	chr11:121563740-121578703	0.0426774	0.908488	4.41192	-4.46746	7.91523e-06	0.000139907	yes
NM_021465	Stag2	chrX:39502588-39630363	9.07646	32.0019	1.81796	-4.46727	7.92236e-06	0.000140002	yes
NM_013932	Ddx25	chr9:35349432-35366055	1.09456	7.3617	2.74968	-4.46491	8.01043e-06	0.000141372	yes
NM_011281	Rorc	chr3:94176715-94202196	0.0766129	1.11564	3.86415	-4.46457	8.02303e-06	0.000141574	yes
NM_001163637	Jakmip2	chr18:43691061-43847427	0.00239928	2.7883	10.1826	-4.46075	8.16744e-06	0.000143806	yes
NM_028307	Tdrkh	chr3:94217239-94235421	0.101384	1.25192	3.62624	-4.45951	8.21471e-06	0.000144533	yes
NM_201639	Synm	chr7:74875046-74904628	0.197773	1.9607	3.30945	-4.45499	8.38976e-06	0.000147392	yes
NM_011643	Trpc1	chr9:95607047-95650777	0.190632	1.62356	3.0903	-4.43967	9.00976e-06	0.000157221	yes
NM_175485	Prtg	chr9:72655080-72765114	5.96227	16.2028	1.44231	-4.43455	9.22658e-06	0.000160591	yes
NM_001177794	Sertad4	chr1:194670681-194681946	0.18386	2.52186	3.77781	-4.43446	9.23032e-06	0.000160644	yes
NM_026805	Svop	chr5:114476921-114541389	0.274764	1.97942	2.84881	-4.43295	9.29509e-06	0.000161649	yes
NM_001081114	Clip3	chr7:31076771-31093386	0.573406	3.85258	2.7482	-4.43159	9.35421e-06	0.000162566	yes
NM_025949	Rps6ka6	chrX:108501445-108651568	11.4533	31.0894	1.44066	-4.43089	9.3847e-06	0.00016301	yes
NM_008591	Met	chr6:17413956-17523980	0.905015	3.97155	2.13369	-4.43025	9.41244e-06	0.000163436	yes
NM_009574	Zic2	chr14:122874605-122879550	8.74421	25.6404	1.55202	-4.42944	9.44783e-06	0.000163957	yes
NM_198865	Slitrk5	chr14:112074336-112082357	0.145889	1.16685	2.99968	-4.41619	1.00458e-05	0.000173132	yes
NM_027808	Alpk1	chr3:127373227-127483445	0.00694109	0.659564	6.57021	-4.41208	1.02381e-05	0.000176006	yes
NM_007759	Crabp2	chr3:87752614-87757294	1.30788	8.97568	2.77879	-4.41026	1.03246e-05	0.000177315	yes
NM_007913	Egr1	chr18:35020860-35024610	0.132773	1.51214	3.50956	-4.40904	1.03831e-05	0.000178187	yes
NM_010218	Fjx1	chr2:102289522-102291949	0.825273	5.00997	2.60186	-4.40854	1.0407e-05	0.000178541	yes
NM_011582	Thbs4	chr13:93521540-93564773	0.011992	0.671507	5.80726	-4.40731	1.04662e-05	0.000179383	yes
NM_030014	Hook1	chr4:95626401-95690965	11.9384	32.1316	1.42838	-4.40264	1.06939e-05	0.000182857	yes
NM_011400	Slc2a1	chr4:118781349-118809934	75.9633	218.841	1.52651	-4.39502	1.1076e-05	0.000188749	yes
NM_144853	Cyyr1	chr16:85456489-85550618	0.0373966	0.932901	4.64075	-4.39475	1.10899e-05	0.000188951	yes
NM_025276	Evpl	chr11:116081872-116099405	0.188838	1.23258	2.70646	-4.39351	1.11536e-05	0.000189876	yes
NM_026515	2810417H13Rik	chr9:65676732-65756601	7.48449	35.8111	2.25843	-4.39328	1.11651e-05	0.000190065	yes
NM_001037712	Kcnh6	chr11:105869516-105895378	0.0805066	0.947909	3.55757	-4.39233	1.12142e-05	0.0001908	yes
NM_015803	Atp8a2	chr14:60266577-60705671	0.0279504	0.565129	4.33764	-4.39057	1.13056e-05	0.000192145	yes
NM_011207	Ptpn3	chr4:57203712-57314709	3.00983	9.21047	1.61359	-4.38694	1.14958e-05	0.000195009	yes
NM_015825	Sh3bgr	chr16:96422076-96450540	0.0697053	1.66589	4.57888	-4.38658	1.15145e-05	0.000195256	yes
NM_010117	Rhbdf1	chr11:32109584-32122293	1.24451	7.13591	2.51952	-4.38618	1.15358e-05	0.000195534	yes
NM_001270646	Prob1	chr18:35810004-35814853	0.236116	1.56272	2.72649	-4.3832	1.16949e-05	0.000197907	yes
NM_144551	Trib2	chr12:15798532-15823591	0.520542	3.28797	2.65911	-4.38037	1.1848e-05	0.000200137	yes
NM_027164	Lrrc27	chr7:146289536-146428872	0.184828	2.06271	3.48029	-4.37671	1.20485e-05	0.000203075	yes
NM_019479	Hes6	chr1:93308059-93309799	5.41516	22.7259	2.06926	-4.37594	1.20913e-05	0.000203704	yes
NM_013476	Ar	chrX:95345088-95512486	0.0336841	0.647067	4.26377	-4.37285	1.22637e-05	0.000206248	yes
NM_023118	Dab2	chr15:6249788-6390709	0.0626945	0.780747	3.63844	-4.36986	1.24323e-05	0.000208757	yes
NM_026599	Cgnl1	chr9:71474315-71619409	1.61429	5.77853	1.8398	-4.36625	1.26396e-05	0.000211928	yes
NM_177013	Tmem229a	chr6:24901140-24906125	0.0629913	0.664087	3.39815	-4.36328	1.28128e-05	0.000214443	yes
NM_009181	St8sia2	chr7:81084005-81158568	0.0571813	0.681385	3.57485	-4.36284	1.28387e-05	0.000214833	yes
NM_028207	Dusp3	chr11:101832457-101846105	1.87573	7.38235	1.97662	-4.35952	1.30347e-05	0.000217657	yes
NM_031199	Tgfa	chr6:86145244-86225443	0.155799	1.18831	2.93115	-4.3576	1.31498e-05	0.000219414	yes
NM_007453	Prdx6	chr1:163170242-163181297	44.5431	116.298	1.38455	-4.35152	1.35197e-05	0.000224793	yes
NM_001085415	Zfp467	chr6:48377690-48395824	0.0699812	2.02436	4.85435	-4.34988	1.3621e-05	0.000226275	yes
NM_010162	Ext1	chr15:52899817-53177738	7.39738	21.1168	1.51331	-4.34672	1.38189e-05	0.000229112	yes
NM_178218	Hist3h2a	chr11:58768186-58768694	172.526	470.425	1.44716	-4.34288	1.40629e-05	0.000232781	yes
NM_027834	9130008F23Rik	chr17:41012430-41017507	0.0182449	0.955026	5.70998	-4.32988	1.49193e-05	0.000245106	yes
NM_001011874	Xkr4	chr1:3204562-3661579	0.00545794	1.00017	7.51768	-4.32955	1.49412e-05	0.000245408	yes
NM_009513	Nrsn1	chr13:25343907-25361865	0.0129209	0.916296	6.14804	-4.32897	1.4981e-05	0.000245969	yes
NM_133189	Cacng7	chr7:3336684-3366537	1.64785	10.6339	2.69002	-4.32746	1.50839e-05	0.000247424	yes
NM_007405	Adcy6	chr15:98420420-98438064	0.314167	1.8216	2.5356	-4.32613	1.51754e-05	0.00024879	yes
NM_175430	Ccdc40	chr11:119089885-119126526	0.209181	1.40924	2.75209	-4.32159	1.54909e-05	0.000253383	yes
NM_001005784	Inadl	chr4:98062516-98386294	1.23528	9.05794	2.87434	-4.3171	1.58091e-05	0.000257942	yes
NM_021704	Cxcl12	chr6:117118552-117131386	0.0657954	2.49401	5.24434	-4.30917	1.63865e-05	0.000266193	yes
NM_009521	Wnt3	chr11:103635488-103679335	0.116826	1.09366	3.22673	-4.30538	1.66701e-05	0.000270198	yes
NM_016719	Grb14	chr2:64750539-64860823	0.119754	1.45686	3.60472	-4.3053	1.6676e-05	0.000270277	yes
NM_001162485	Arrdc1	chr2:24780871-24790801	2.75213	14.4444	2.3919	-4.30423	1.67566e-05	0.000271455	yes
NM_130877	Peg10	chr6:4697305-4710516	1.24458	4.73829	1.92871	-4.29813	1.72244e-05	0.000278108	yes
NM_001015099	G2e3	chr12:52449216-52477973	6.5347	18.0099	1.4626	-4.29495	1.74735e-05	0.000281693	yes
NM_001164491	Ablim3	chr18:61959046-62071506	0.017994	0.624753	5.1177	-4.29457	1.7503e-05	0.000282124	yes
NM_008855	Prkcb	chr7:129432638-129777915	0.453104	2.14687	2.24432	-4.29042	1.78336e-05	0.000286852	yes
NM_022020	Rbp7	chr4:148823810-148829077	0.197454	3.90983	4.30752	-4.29039	1.78361e-05	0.000286862	yes
NM_010894	Neurod1	chr2:79292797-79296793	0.163935	1.6455	3.32732	-4.29	1.78673e-05	0.000287296	yes
NM_009801	Car2	chr3:14886425-14900770	19.0684	51.7412	1.44013	-4.28541	1.82399e-05	0.000292615	yes
NM_134050	Rab15	chr12:77898949-77923511	3.55274	12.328	1.79493	-4.28132	1.85786e-05	0.000297396	yes
NM_018738	Igtp	chr11:58013057-58021094	0.301273	2.52989	3.06993	-4.28069	1.86317e-05	0.000298137	yes
NM_029797	Mnd1	chr3:83891855-83959708	14.9721	51.443	1.7807	-4.27984	1.87029e-05	0.000299196	yes
NM_146004	Mfsd6l	chr11:68369687-68371747	0.0134437	0.911142	6.08267	-4.27946	1.87343e-05	0.000299634	yes
NM_133738	Antxr2	chr5:98313706-98459981	0.0160748	0.543006	5.07809	-4.27721	1.8925e-05	0.000302368	yes
NM_016762	Matn2	chr15:34236435-34365995	0.145053	1.20782	3.05776	-4.27129	1.94344e-05	0.000309573	yes
NM_001001883	Hecw2	chr1:53863717-54251878	0.106476	0.747759	2.81205	-4.25932	2.05051e-05	0.000324135	yes
NM_001198914	Myb	chr10:20844735-20880790	0.309836	6.03806	4.28451	-4.25671	2.0746e-05	0.000327499	yes
NM_001081750	Zfp664	chr5:125343074-125369000	10.8448	28.2997	1.38379	-4.25621	2.07917e-05	0.000328096	yes
NM_001039090	Skil	chr3:30993979-31021845	7.84429	25.7197	1.71316	-4.25497	2.09075e-05	0.000329663	yes
NR_033498	AI504432	chr3:106842421-106857240	0.0217175	0.381583	4.13506	-4.24861	2.15102e-05	0.000338118	yes
NR_040354	C630020P19Rik	chr2:143361211-143642018	0.0125531	0.862811	6.10293	-4.2474	2.16262e-05	0.000339628	yes
NM_009549	Zfp185	chrX:70232677-70276882	1.68578	8.27117	2.29467	-4.24695	2.16705e-05	0.000340238	yes
NM_001081428	Fam184a	chr10:53352951-53470715	0.237206	1.54476	2.70317	-4.2453	2.18302e-05	0.000342478	yes
NM_176952	6430573F11Rik	chr8:37552244-37576067	0.706408	4.45484	2.6568	-4.23528	2.28271e-05	0.000355987	yes
NM_001082976	Tc2n	chr12:102883655-102956733	0.0457237	0.549303	3.58659	-4.23484	2.28714e-05	0.000356586	yes
NM_172932	Nlgn3	chrX:98494517-98516689	0.0343307	0.513007	3.9014	-4.22917	2.34555e-05	0.000364655	yes
NM_183289	Tcerg1l	chr7:145400654-145589413	0.0278848	0.700175	4.65016	-4.22723	2.36582e-05	0.000367404	yes
NM_145958	Kbtbd2	chr6:56727518-56747807	12.2614	31.6818	1.36953	-4.22248	2.41626e-05	0.000374129	yes
NM_018782	Calcrl	chr2:84170782-84265423	0.0087862	0.532562	5.92157	-4.21703	2.47538e-05	0.000382362	yes
NM_172285	Plcg2	chr8:120022190-120159042	15.4952	39.1721	1.33801	-4.21476	2.5004e-05	0.000385742	yes
NM_001037809	Cdh3	chr8:109034751-109080811	2.66292	9.44515	1.82657	-4.21421	2.50651e-05	0.000386606	yes
NM_001033207	Nlrc5	chr8:96996662-97051172	0.0229086	0.35354	3.94791	-4.21295	2.52057e-05	0.000388509	yes
NM_175318	Spty2d1	chr7:54245765-54263784	2.82112	8.77221	1.63667	-4.20793	2.57725e-05	0.000396409	yes
NM_016904	Cks1b	chr3:89219393-89222213	74.5706	192.203	1.36595	-4.20695	2.58844e-05	0.000397826	yes
NM_008484	Lamb3	chr1:195128187-195170072	0.0519813	1.0508	4.33735	-4.20278	2.6366e-05	0.000404251	yes
NM_021431	Nudt11	chrX:5624624-5631869	0.709232	3.97758	2.48756	-4.20201	2.64559e-05	0.00040537	yes
NM_025314	Dtd1	chr2:144425688-144594483	8.41248	29.6752	1.81866	-4.19653	2.71041e-05	0.000414196	yes
NR_027352	Vash2	chr1:192771524-192803175	0.073183	1.86459	4.6712	-4.19615	2.71488e-05	0.000414827	yes
NM_011391	Slc16a7	chr10:124664540-124765591	0.00711359	1.43543	7.65669	-4.19257	2.75809e-05	0.00042059	yes
NM_026163	Pkp2	chr16:16213437-16272805	7.51041	21.334	1.50619	-4.18919	2.79954e-05	0.000426102	yes
NM_183311	Tmem145	chr7:26091126-26101214	0.0402816	0.7456	4.21021	-4.1887	2.80553e-05	0.000426906	yes
NM_025638	Gdpd1	chr11:86847295-86887639	0.602113	3.52193	2.54826	-4.18416	2.86225e-05	0.000434564	yes
NM_029881	Tmem200a	chr10:25710991-25799253	0.388035	2.31253	2.57522	-4.18383	2.86638e-05	0.000435058	yes
NM_175514	Fam171b	chr2:83652884-83721515	0.506422	2.92652	2.53077	-4.17827	2.93731e-05	0.000444393	yes
NM_172788	Sh3rf3	chr10:58276106-58601664	0.0457449	0.4539	3.31069	-4.17785	2.94279e-05	0.000445096	yes
NM_010200	Fgf13	chrX:56315323-56838749	0.167143	1.76863	3.40348	-4.17752	2.947e-05	0.000445692	yes
NM_007488	Arnt2	chr7:91394784-91558548	0.614502	2.85617	2.21659	-4.17363	2.9979e-05	0.000452356	yes
NM_145978	Pdlim2	chr14:70564024-70577479	0.0506303	1.36134	4.74888	-4.17032	3.04178e-05	0.000458129	yes
NM_153392	Ttc39a	chr4:109079704-109117350	0.505227	3.15908	2.6445	-4.16894	3.06024e-05	0.00046052	yes
NM_011227	Rab20	chr8:11453976-11480241	0.229052	3.4771	3.92413	-4.15312	3.27967e-05	0.000489148	yes
NM_011581	Thbs2	chr17:14802506-14831269	0.0758395	0.63776	3.07199	-4.14723	3.36515e-05	0.000500257	yes
NM_007496	Zfhx3	chr8:111238543-111485536	0.503379	1.84454	1.87355	-4.14363	3.41856e-05	0.000507282	yes
NM_021316	Cend1	chr7:148612349-148615319	0.0277793	1.06701	5.26343	-4.14323	3.42448e-05	0.000508059	yes
NM_011834	Aadat	chr8:62984920-63024474	0.0198235	1.43656	6.17927	-4.14209	3.44153e-05	0.00051029	yes
NM_016694	Park2	chr17:11033249-12256226	0.0955669	1.01428	3.4078	-4.14072	3.46217e-05	0.000512877	yes
NM_133653	Mat1a	chr14:41918321-41937717	0.0199527	0.701873	5.13655	-4.13979	3.47617e-05	0.000514698	yes
NM_001005426	Zcwpw1	chr5:138229029-138277506	3.99362	14.4742	1.85772	-4.13868	3.4931e-05	0.000516856	yes
NM_173402	Rgs12	chr5:35292096-35376242	1.40746	5.52313	1.97239	-4.13749	3.51127e-05	0.00051929	yes
NM_023627	Isyna1	chr8:73118379-73121189	23.7631	60.7134	1.35329	-4.13651	3.52622e-05	0.000521214	yes
NM_138752	Plekhg2	chr7:29144622-29157681	0.66797	5.64366	3.07878	-4.12943	3.63658e-05	0.000535033	yes
NM_001253754	Gpm6a	chr8:55864786-56146231	0.0101348	0.891947	6.45957	-4.12928	3.63901e-05	0.000535359	yes
NM_001162532	Fam174b	chr7:80885192-80921805	0.287013	1.8881	2.71775	-4.12591	3.69272e-05	0.000542351	yes
NM_001038653	Slc16a3	chr11:120809797-120820314	13.5119	38.0866	1.49505	-4.12582	3.69412e-05	0.000542523	yes
NM_011226	Rab19	chr6:39331426-39340378	0.173949	1.86282	3.42076	-4.11808	3.82047e-05	0.000558511	yes
NM_001031664	Nudt10	chrX:5745814-5750109	0.170697	1.63566	3.26037	-4.11723	3.83461e-05	0.000560222	yes
NM_183178	Fsd1	chr17:56125933-56136304	2.10211	9.77525	2.2173	-4.11249	3.91406e-05	0.000569984	yes
NM_001163457	Mttp	chr3:137752818-137806352	0.433526	2.34586	2.43592	-4.11228	3.91763e-05	0.000570433	yes
NM_145933	St6gal1	chr16:23224812-23360423	1.17414	5.81725	2.30874	-4.10401	4.06051e-05	0.000588519	yes
NM_001039162	Clip2	chr5:134965252-135028304	0.544849	2.94829	2.43595	-4.09643	4.19577e-05	0.000605624	yes
NM_001033460	Drc1	chr5:30607913-30668993	0.040135	0.899694	4.4865	-4.09392	4.24135e-05	0.000611295	yes
NM_008869	Pla2g4a	chr1:151676751-151808414	0.460435	2.65919	2.52992	-4.09108	4.2937e-05	0.000617935	yes
NM_023597	Wdr31	chr4:62113665-62131929	2.103	9.53111	2.18019	-4.09005	4.31276e-05	0.000620252	yes
NM_019765	Clip1	chr5:124027802-124134370	1.38663	5.68954	2.03673	-4.08917	4.32915e-05	0.000622313	yes
NM_030595	Nbea	chr3:55429119-55987623	1.11842	3.51782	1.65322	-4.08907	4.3311e-05	0.0006225	yes
NM_008426	Kcnj3	chr2:55289566-55447936	0.733141	4.79173	2.70839	-4.08883	4.3356e-05	0.000623091	yes
NM_026856	Zfp644	chr5:107045759-107125849	9.43679	23.3718	1.3084	-4.0839	4.4286e-05	0.000634943	yes
NM_010153	Erbb3	chr10:128006423-128026557	4.50724	12.9394	1.52146	-4.07723	4.55746e-05	0.000651426	yes
NM_175465	Sestd1	chr2:77018396-77118649	1.31043	4.16365	1.6678	-4.06918	4.71799e-05	0.000671593	yes
NM_178197	Hist1h2bh	chr13:23634791-23635313	85.5214	227.132	1.40917	-4.06899	4.72183e-05	0.000672011	yes
NM_133186	Steap3	chr1:122122992-122167659	3.128	11.5423	1.88361	-4.06255	4.85394e-05	0.000688519	yes
NM_172503	Zswim4	chr8:86734840-86760941	4.9903	13.7001	1.45699	-4.06255	4.85395e-05	0.000688519	yes
NM_008862	Pkia	chr3:7366603-7445365	0.257835	1.79682	2.80092	-4.05723	4.9658e-05	0.000702483	yes
NM_025869	Dusp26	chr8:32200133-32207519	0.156758	1.46359	3.22291	-4.05653	4.98067e-05	0.000704257	yes
NM_001168589	Vrtn	chr12:85981968-85992405	0.146465	7.71172	5.71843	-4.05561	5.00026e-05	0.000706509	yes
NM_011990	Slc7a11	chr3:50168857-50247535	0.123765	0.835463	2.75497	-4.05258	5.06558e-05	0.000714441	yes
NM_019771	Dstn	chr2:143741066-143769060	92.2846	234.598	1.34603	-4.05097	5.10055e-05	0.000718575	yes
NM_153582	Cmtm4	chr8:106872092-106919707	6.3727	15.7284	1.3034	-4.04277	5.28235e-05	0.00074088	yes
NM_183023	Rims4	chr2:163689616-163744419	0.042302	3.16388	6.22483	-4.02792	5.62727e-05	0.000783229	yes
NM_001034894	Foxr2	chrX:149553330-149567404	0.216124	1.48255	2.77815	-4.02727	5.64284e-05	0.000785163	yes
NM_027870	Armcx3	chrX:131291106-131295995	0.301425	1.88293	2.6431	-4.02701	5.64899e-05	0.000785877	yes
NM_153143	Kctd11	chr11:69691765-69694487	0.198353	1.44941	2.86933	-4.02679	5.65433e-05	0.000786507	yes
NM_172685	Slc25a24	chr3:108926066-108971327	0.654758	3.31732	2.34099	-4.02579	5.67846e-05	0.000789363	yes
NM_173012	Letm2	chr8:26688961-26707959	0.0921685	1.00913	3.4527	-4.02354	5.73302e-05	0.000795938	yes
NM_013918	Usp25	chr16:77014313-77117025	1.83838	6.44908	1.81066	-4.02192	5.77246e-05	0.000800561	yes
NM_175274	Ttyh3	chr5:141096531-141124985	0.831188	3.71715	2.16095	-4.02176	5.77656e-05	0.000800968	yes
NM_001045524	AK129341	chr9:8076632-8134294	0.565648	2.87759	2.34688	-4.01478	5.95018e-05	0.000821947	yes
NM_001164184	Lsr	chr7:31742788-31758488	3.62601	15.202	2.0678	-4.01368	5.97796e-05	0.000825218	yes
NM_001128086	Anks1b	chr10:89336253-90435729	0.105298	0.659125	2.64608	-4.0116	6.03084e-05	0.000831447	yes
NM_144867	Slmo1	chr18:67624502-67640235	0.207974	1.51642	2.86619	-4.00494	6.20337e-05	0.000851897	yes
NM_007930	Enc1	chr13:98011059-98022995	9.77963	23.9896	1.29456	-4.0005	6.32101e-05	0.000866005	yes
NM_146189	Mybpc2	chr7:51757068-51780039	0.0737908	0.672973	3.18904	-3.99889	6.36393e-05	0.000871466	yes
NM_130880	Otud7a	chr7:70589657-70903913	0.0497671	0.546611	3.45725	-3.99871	6.36881e-05	0.000872004	yes
NM_176860	Ubash3b	chr9:40821723-40965577	0.0913885	0.782063	3.0972	-3.99727	6.40759e-05	0.000876498	yes
NM_177763	Lhfpl4	chr6:113118080-113145378	0.0758535	0.676769	3.15738	-3.99338	6.51379e-05	0.000889329	yes
NM_015775	Tmprss2	chr16:97786288-97832802	0.0355066	0.511873	3.84962	-3.99166	6.56124e-05	0.00089475	yes
NM_008418	Kcna3	chr3:106839079-106841047	0.047623	0.774592	4.02371	-3.98864	6.64523e-05	0.00090482	yes
NM_010242	Fut4	chr9:14552902-14556566	0.0172954	0.363864	4.39494	-3.98773	6.67077e-05	0.000907836	yes
NM_198003	Zfp946	chr17:22561234-22593656	2.4752	8.95983	1.85593	-3.98707	6.68951e-05	0.000909978	yes
NM_139298	Wnt9a	chr11:59120431-59147054	0.0656599	0.643174	3.29213	-3.98557	6.73177e-05	0.000914817	yes
NM_017377	B4galt2	chr4:117545604-117556081	1.86214	8.27424	2.15167	-3.98317	6.80029e-05	0.000922473	yes
NM_001033306	Shb	chr4:45436147-45543700	3.00463	10.5487	1.8118	-3.97998	6.8922e-05	0.000933601	yes
NM_175251	Arid2	chr15:96117952-96235894	7.45471	17.8696	1.26129	-3.97773	6.9577e-05	0.000941354	yes
NM_177320	Pik3r5	chr11:68245626-68311348	0.007996	0.315161	5.30067	-3.97385	7.07199e-05	0.000954523	yes
NM_009455	Ube2e1	chr14:19103655-19164358	7.28992	27.464	1.91357	-3.97218	7.12173e-05	0.000960306	yes
NM_001037711	Cgn	chr3:94563990-94590437	0.103055	4.4691	5.4385	-3.96949	7.20268e-05	0.000969802	yes
NM_177293	Mtap7d3	chrX:54051129-54075502	0.499291	2.73939	2.45591	-3.96615	7.30414e-05	0.000981578	yes
NM_178679	Zfp365	chr10:67348852-67375410	2.83469	8.75375	1.62671	-3.96507	7.33731e-05	0.000985618	yes
NM_001252453	Ptprs	chr17:56551848-56615903	0.739555	18.7833	4.66665	-3.96416	7.3656e-05	0.000988941	yes
NM_146015	Efemp1	chr11:28753204-28826743	0.681615	3.96983	2.54205	-3.96391	7.37323e-05	0.000989699	yes
NM_025347	Ypel3	chr7:133920488-133924028	9.41038	33.1688	1.8175	-3.96325	7.39369e-05	0.000991949	yes
NM_027127	Gpx8	chr13:113825586-113881343	2.41476	13.2909	2.46048	-3.96304	7.40006e-05	0.000992611	yes
NM_010043	Des	chr1:75356866-75371590	0.646477	3.33981	2.36909	-3.96298	7.40196e-05	0.00099281	yes
NM_029352	Dusp9	chrX:70884779-70888853	9.61496	25.4858	1.40634	-3.96077	7.47077e-05	0.00100062	yes
NM_053185	Col4a6	chrX:137599945-137908619	0.0112479	0.230794	4.35888	-3.95873	7.53487e-05	0.00100831	yes
NM_029614	Prss23	chr7:96656294-96666096	0.010958	0.425411	5.2788	-3.95711	7.58631e-05	0.00101407	yes
NM_182929	Rims3	chr4:120550473-120564165	1.64416	8.74926	2.41181	-3.95671	7.59883e-05	0.00101554	yes
NM_021399	Bcl11b	chr12:109148612-109241624	0.0117259	0.326825	4.80075	-3.95584	7.62656e-05	0.00101872	yes
NM_176942	Gabra5	chr7:64642641-64765379	0.00959	1.44892	7.23923	-3.95388	7.68946e-05	0.00102569	yes
NM_146260	Tmie	chr9:110768549-110782587	0.0692282	0.755086	3.44721	-3.94781	7.88691e-05	0.00104818	yes
NR_003258	Gnas	chr2:174106737-174172243	28.6804	95.2619	1.73183	-3.93946	8.16667e-05	0.00108074	yes
NM_027949	Phf7	chr14:32050881-32064404	0.982878	4.91236	2.32133	-3.93919	8.17564e-05	0.00108181	yes
NM_009305	Syp	chrX:7215705-7230382	0.132665	1.07501	3.01848	-3.93821	8.20908e-05	0.00108567	yes
NM_008285	Hrh1	chr6:114347929-114433290	0.065107	0.643412	3.30486	-3.93736	8.23826e-05	0.00108881	yes
NM_177630	Ldoc1l	chr15:84383827-84388253	0.662104	3.06128	2.20901	-3.93556	8.30035e-05	0.00109597	yes
NM_026037	Mboat2	chr12:25516463-25645164	3.59636	12.7121	1.82159	-3.93353	8.37072e-05	0.00110417	yes
NM_010548	Il10	chr1:132916421-132921547	0.0292635	1.11118	5.24685	-3.92914	8.52508e-05	0.00112186	yes
NM_001113360	Plch2	chr4:154357223-154385093	0.0477906	0.489647	3.35695	-3.92555	8.65302e-05	0.00113647	yes
NM_026162	Plxdc2	chr2:16277930-16677466	1.41968	4.54831	1.67977	-3.92215	8.77633e-05	0.00115047	yes
NM_024272	Ssbp2	chr13:91600701-91925753	0.352917	1.83293	2.37675	-3.92208	8.77884e-05	0.00115077	yes
NM_001162882	Syce3	chr15:89220604-89240934	0.461616	6.14309	3.7342	-3.92191	8.7851e-05	0.00115153	yes
NM_182927	Spred3	chr7:29943847-29953666	0.472971	2.33945	2.30635	-3.91725	8.95634e-05	0.00117089	yes
NM_182716	Nfasc	chr1:134461266-134638374	0.0891477	1.633	4.19518	-3.9137	9.08932e-05	0.00118574	yes
NM_177157	Gchfr	chr2:118993523-118998125	0.223202	3.00114	3.74909	-3.90564	9.39768e-05	0.00122035	yes
NM_153791	Flywch1	chr17:23892389-23908558	4.28068	13.5322	1.66048	-3.90417	9.455e-05	0.00122663	yes
NM_013614	Odc1	chr12:17551678-17558308	94.4952	240.463	1.3475	-3.89593	9.78232e-05	0.00126288	yes
NM_029077	Trim14	chr4:46517943-46549013	0.0964198	0.767249	2.99229	-3.89504	9.81823e-05	0.00126677	yes
NM_001109756	Adcy7	chr8:90796301-90853861	0.0526665	0.506432	3.26541	-3.8933	9.88895e-05	0.00127457	yes
NM_010588	Jag2	chr12:114146800-114167706	1.41905	5.3512	1.91493	-3.89034	0.000100104	0.00128812	yes
NM_174998	Hpcal4	chr4:122860746-122871942	0.0273072	0.332261	3.60496	-3.88552	0.00010211	0.0013103	yes
NM_029007	Fam84a	chr12:14154403-14158844	0.0673409	0.606307	3.17049	-3.88431	0.00010262	0.00131597	yes
NM_021478	Tulp1	chr17:28488463-28502088	0.346318	2.14371	2.62994	-3.87539	0.000106453	0.0013587	yes
NM_175367	Ston2	chr12:92871448-93024876	1.63287	4.52744	1.47128	-3.87182	0.000108024	0.00137539	yes
NR_015464	A330069E16Rik	chr2:91077302-91078514	0.234737	2.36189	3.33083	-3.86965	0.000108994	0.00138615	yes
NM_001159627	Heph	chrX:93650774-93769823	0.231077	1.47788	2.67708	-3.86941	0.000109099	0.00138721	yes
NM_183315	Ctxn1	chr8:4257645-4259274	0.482755	3.11727	2.69092	-3.86766	0.000109887	0.00139554	yes
NR_040577	1700123M08Rik	chr4:11893720-11921442	0.0651317	1.35418	4.37792	-3.86741	0.00011	0.00139679	yes
NR_045598	Gm15706	chr6:145199071-145200376	0.523518	3.70133	2.82173	-3.86524	0.000110981	0.00140795	yes
NM_008141	Gnat2	chr3:107895983-107904348	0.0822334	1.07822	3.71278	-3.86468	0.000111234	0.00141056	yes
NM_176959	Fbxl7	chr15:26470213-26825319	0.0462222	0.425844	3.20366	-3.86401	0.000111543	0.00141385	yes
NM_173765	Aasdh	chr5:77304959-77334539	2.13337	7.20798	1.75646	-3.86262	0.000112179	0.00142102	yes
NM_008815	Etv4	chr11:101631055-101646624	8.21986	22.0968	1.42665	-3.85629	0.000115121	0.00145219	yes
NM_178396	Car12	chr9:66561492-66614652	0.22746	1.29309	2.50714	-3.85313	0.000116618	0.00146823	yes
NM_010425	Foxd3	chr4:99322989-99325362	2.91121	10.279	1.82	-3.85182	0.000117244	0.00147486	yes
NM_028258	Dzip1l	chr9:99530013-99569675	1.07734	4.35161	2.01407	-3.85153	0.000117381	0.00147625	yes
NM_010014	Dab1	chr4:104040142-104417449	1.92385	14.1128	2.87494	-3.85057	0.000117844	0.00148112	yes
NM_001163136	Macc1	chr12:120681882-120705405	0.00219937	0.987349	8.81033	-3.84997	0.000118135	0.00148422	yes
NM_001146196	Scin	chr12:40786357-40860815	0.0169998	0.73495	5.43406	-3.84378	0.000121155	0.00151719	yes
NM_028820	1700017B05Rik	chr9:57100128-57110406	4.30348	11.4132	1.40713	-3.8395	0.000123287	0.00153986	yes
NR_036602	4933421O10Rik	chr4:33114113-33118298	0.0407848	0.47354	3.53738	-3.8368	0.000124647	0.00155463	yes
NM_020293	Cldn9	chr17:23819550-23820993	0.138122	1.40548	3.34705	-3.83578	0.000125166	0.00156049	yes
NM_013568	Kcna6	chr6:126658346-126690692	0.0045025	0.199841	5.47198	-3.83488	0.000125626	0.00156546	yes
NM_172778	Maob	chrX:16286406-16394492	0.014913	0.519316	5.12197	-3.8347	0.000125719	0.00156637	yes
NM_024250	Phf10	chr17:15080188-15098237	35.7578	95.4563	1.41658	-3.83013	0.000128074	0.00159161	yes
NM_001198831	Ddr1	chr17:35818511-35841084	0.290552	7.32751	4.65646	-3.82891	0.000128713	0.00159877	yes
NM_145226	Oas3	chr5:121203106-121227668	0.146596	0.85648	2.54657	-3.82422	0.000131186	0.0016253	yes
NM_007906	Eef1a2	chr2:180882396-180891720	0.0270867	0.598683	4.46614	-3.82382	0.0001314	0.00162736	yes
NM_026280	Mxra7	chr11:116664713-116689360	1.07161	5.17914	2.27294	-3.82374	0.000131441	0.00162779	yes
NM_001024698	Cpa2	chr6:30491641-30514473	0.124538	1.34493	3.43288	-3.82371	0.00013146	0.00162791	yes
NM_027642	Phf6	chrX:50265390-50310138	3.32729	9.55145	1.52137	-3.82231	0.000132209	0.00163578	yes
NM_011565	Tead2	chr7:52471122-52488989	38.8418	91.492	1.23604	-3.82213	0.000132306	0.00163669	yes
NM_009932	Col4a2	chr8:11312828-11449287	0.350723	1.63592	2.2217	-3.82186	0.000132449	0.0016383	yes
NM_008168	Grik5	chr7:25794869-25857388	0.488099	2.33463	2.25795	-3.82046	0.000133202	0.00164621	yes
NM_175631	Cbln4	chr2:171861835-171868966	0.00609102	0.775015	6.9914	-3.82017	0.000133359	0.00164786	yes
NM_133182	Prmt2	chr10:75669970-75700610	0.745281	4.29921	2.52821	-3.81487	0.000136253	0.00167812	yes
NM_007606	Car3	chr3:14863537-14872373	0.188593	1.51664	3.00753	-3.81157	0.000138089	0.0016978	yes
NM_144848	Eppk1	chr15:75931917-75956986	0.379257	1.4557	1.94047	-3.80701	0.000140655	0.00172524	yes
NM_001143849	Pde2a	chr7:108570204-108661343	0.058755	1.13549	4.27246	-3.80634	0.000141039	0.00172916	yes
NM_177615	Slc26a10	chr10:126609481-126617701	0.1516	1.15979	2.93552	-3.80619	0.000141125	0.00173012	yes
NM_011267	Rgs16	chr1:155587482-155592598	0.0376034	0.715706	4.25043	-3.80507	0.000141765	0.00173661	yes
NM_029568	Mfap4	chr11:61298945-61302206	0.0377337	0.82089	4.44326	-3.80475	0.000141947	0.00173848	yes
NM_144796	Susd4	chr1:184695036-184825785	0.769047	3.82973	2.3161	-3.79971	0.000144864	0.00176926	yes
NM_177919	Tceal5	chrX:132735489-132738390	0.039139	1.33035	5.08705	-3.79876	0.00014542	0.00177524	yes
NM_016786	Ube2k	chr5:65928499-65990228	11.0164	25.6844	1.22125	-3.79044	0.00015038	0.00182674	yes
NM_001111118	Rad51ap2	chr12:11462884-11469734	0.0147656	0.357105	4.59604	-3.78047	0.00015653	0.00189186	yes
NM_023141	Tor3a	chr1:158583747-158604470	1.94995	6.86867	1.81659	-3.7752	0.000159882	0.00192716	yes
NM_175178	Aifm3	chr16:17489769-17507578	0.738713	3.46917	2.2315	-3.77353	0.000160956	0.0019387	yes
NM_009223	Snn	chr16:11066390-11134625	2.94852	12.3476	2.06617	-3.77253	0.000161602	0.00194541	yes
NM_172546	Cnksr3	chr10:3134303-3227479	3.09865	9.37211	1.59673	-3.76841	0.00016429	0.00197265	yes
NM_134079	Adk	chr14:21871795-22267791	14.3878	38.329	1.41359	-3.76614	0.000165791	0.00198795	yes
NM_026418	Rgs10	chr7:135517138-135561686	1.16411	6.31557	2.43968	-3.76226	0.000168386	0.00201466	yes
NM_011889	44077	chr15:82105364-82124872	0.834289	3.30939	1.98795	-3.7571	0.000171897	0.00205138	yes
NM_023908	Slco3a1	chr7:81420303-81699666	0.0643924	0.557186	3.1132	-3.757	0.000171962	0.00205211	yes
NM_183024	Raver2	chr4:100741642-100937887	2.32314	15.0858	2.69904	-3.75375	0.00017421	0.0020761	yes
NM_008608	Mmp14	chr14:55050440-55060095	1.16375	4.98386	2.09848	-3.7527	0.000174939	0.00208349	yes
NM_001135151	Slc39a14	chr14:70703273-70751231	0.247191	3.08334	3.6408	-3.75064	0.000176381	0.00209804	yes
NM_027468	Cpm	chr10:117066555-117124408	0.072635	0.50863	2.80788	-3.74491	0.000180455	0.00214027	yes
NM_001033148	1700029J07Rik	chr8:47038959-47060606	0.0172534	0.40537	4.55429	-3.74148	0.000182937	0.00216502	yes
NM_170671	Mycbpap	chr11:94362660-94382816	0.00975361	0.387511	5.31216	-3.73631	0.000186737	0.00220286	yes
NM_001077595	Shroom3	chr5:93112460-93394785	1.24658	7.96273	2.67528	-3.73545	0.000187381	0.00220943	yes
NM_015771	Lats2	chr14:58308498-58364960	0.390844	1.87475	2.26204	-3.73323	0.000189037	0.00222596	yes
NM_172854	Olfml2a	chr2:38787499-38816105	0.00843024	0.764529	6.50285	-3.73104	0.00019069	0.00224291	yes
NM_001025365	Miip	chr4:147234886-147242828	3.27631	11.9707	1.86936	-3.73	0.000191482	0.00225058	yes
NM_013585	Psmb9	chr17:34319043-34324275	0.328193	3.337	3.34594	-3.72931	0.000192006	0.00225581	yes
NM_001253706	44080	chrX:34450828-34529690	1.05923	4.7038	2.15082	-3.72779	0.000193166	0.00226788	yes
NM_172393	Aim1	chr10:43670112-43724652	0.0557961	0.384499	2.78474	-3.72533	0.000195062	0.00228753	yes
NM_025281	Lyar	chr5:38611720-38625545	37.2409	85.26	1.19498	-3.7238	0.000196243	0.00229897	yes
NM_009261	Strbp	chr2:37425387-37502805	6.00601	13.5617	1.17506	-3.71918	0.000199867	0.00233581	yes
NM_008578	Mef2b	chr8:72676676-72691387	1.40342	9.49234	2.75782	-3.71778	0.000200983	0.00234704	yes
NM_032398	Plvap	chr8:74021651-74035668	0.0676031	0.766518	3.50316	-3.71692	0.000201664	0.00235339	yes
NM_007925	Eln	chr5:135178465-135223124	0.0118982	0.272826	4.51916	-3.71048	0.00020687	0.00240565	yes
NM_011756	Zfp36	chr7:29161802-29164247	2.43315	9.44149	1.95619	-3.70842	0.000208554	0.0024227	yes
NM_173395	Fam132b	chr1:93263006-93270794	0.249941	1.3989	2.48463	-3.70742	0.000209384	0.00243096	yes
NR_033629	BC021767	chr3:94464510-94471074	0.0317761	0.635641	4.3222	-3.70706	0.000209676	0.00243382	yes
NM_031388	Usp26	chrX:49107135-49154410	0.274378	1.36958	2.3195	-3.70536	0.000211092	0.00244814	yes
NM_173784	Ubtd2	chr11:32355371-32418709	3.17884	9.71955	1.61239	-3.70506	0.000211339	0.00245064	yes
NM_019967	Dbc1	chr4:68422405-68615431	0.05395	0.490866	3.18563	-3.70006	0.000215546	0.00249195	yes
NM_001164251	Tpm1	chr9:66870399-66897020	1.14247	78.4502	6.10155	-3.69493	0.000219944	0.00253574	yes
NM_027126	Hfe2	chr3:96329107-96333139	0.0882217	0.815651	3.20875	-3.69412	0.000220651	0.00254274	yes
NM_009107	Rxrg	chr1:169528492-169569754	0.0144211	0.793143	5.78133	-3.68421	0.000229413	0.00262814	yes
NM_013783	Mmel1	chr4:154243693-154269639	0.156667	0.967539	2.62662	-3.68328	0.000230249	0.00263627	yes
NM_153107	Cpz	chr5:35844866-35868275	0.306323	1.71171	2.48232	-3.68239	0.000231054	0.00264361	yes
NM_011882	Rnasel	chr1:155596555-155611351	0.0161827	0.302371	4.2238	-3.67821	0.000234875	0.00268136	yes
NM_172964	Arhgap28	chr17:68192047-68353448	2.49395	6.93937	1.47637	-3.67263	0.000240065	0.00273245	yes
NM_001271599	Sort1	chr3:108086981-108164437	0.367128	3.57343	3.28295	-3.67216	0.000240512	0.0027367	yes
NM_145621	Camkv	chr9:107838250-107852022	1.41097	5.34058	1.92031	-3.66971	0.000242827	0.00275913	yes
NM_001033173	Usp31	chr7:128785534-128850767	2.62358	6.29329	1.26228	-3.66774	0.000244701	0.00277774	yes
NR_073433	1600023N17Rik	chr5:46059939-46060947	0.114272	1.39993	3.61481	-3.66556	0.000246799	0.00279807	yes
NM_153535	Fam149a	chr8:46422068-46467645	0.0192283	0.231852	3.5919	-3.66527	0.000247078	0.00280069	yes
NM_027147	Enho	chr4:41516826-41587335	0.399009	4.98017	3.6417	-3.66523	0.000247118	0.00280096	yes
NM_026738	1110007C09Rik	chr13:49298319-49311395	5.60624	22.001	1.97246	-3.66501	0.000247333	0.00280276	yes
NM_001039934	Map2	chr1:66221902-66489157	0.485472	2.08496	2.10256	-3.66483	0.000247504	0.00280448	yes
NM_001110337	Gprc5c	chr11:114712845-114733931	1.89167	6.5359	1.78872	-3.65855	0.000253647	0.00286412	yes
NM_177284	Nrxn1	chr17:90432983-91492142	0.0222874	0.19822	3.15281	-3.65496	0.000257222	0.00289866	yes
NM_029861	Cnrip1	chr11:16951936-16979375	0.0068736	1.66742	7.92234	-3.65471	0.000257474	0.00290096	yes
NM_026433	Tmem100	chr11:89891661-89897819	0.0100103	1.0351	6.69213	-3.65298	0.000259217	0.00291807	yes
NM_027491	Rragd	chr4:33069972-33109155	20.7973	46.6091	1.16421	-3.65137	0.000260843	0.00293322	yes
NM_001252153	Tmem106c	chr15:97794659-97800717	2.36836	11.1757	2.2384	-3.6471	0.000265222	0.00297435	yes
NM_178591	Nrg1	chr8:32928499-33028675	0.0458085	0.594847	3.69883	-3.6445	0.000267916	0.00299996	yes
NM_010311	Gnaz	chr10:74420221-74495331	0.383034	1.95984	2.35519	-3.64428	0.000268136	0.00300166	yes
NM_010227	Flna	chrX:71468799-71491873	39.594	125.188	1.66075	-3.6429	0.000269587	0.00301602	yes
NM_138683	Rspo1	chr4:124663673-124686343	0.141229	1.12747	2.99698	-3.63944	0.000273235	0.00305053	yes
NM_001024720	Hmcn1	chr1:152409631-152840565	0.122136	0.547202	2.16358	-3.63573	0.000277194	0.00308944	yes
NM_001271981	Fut1	chr7:52872975-52876429	0.031688	0.890026	4.81184	-3.63383	0.000279243	0.0031094	yes
NM_024469	Bhlhe41	chr6:145806762-145813940	0.0736108	0.470357	2.67577	-3.63237	0.000280835	0.00312424	yes
NM_001081253	Fbxo43	chr15:36079814-36094639	0.01883	0.304452	4.01511	-3.63062	0.00028274	0.0031429	yes
NM_080595	Emid1	chr11:5006268-5052225	0.353368	1.94111	2.45764	-3.62555	0.000288352	0.00319704	yes
NM_011706	Trpv2	chr11:62387987-62413807	0.44533	2.14848	2.27037	-3.62238	0.000291904	0.00323092	yes
NM_026929	Chac1	chr2:119176977-119180062	11.2399	29.675	1.40062	-3.62043	0.000294109	0.00325263	yes
NM_001270842	Gm3558	chr14:8377664-8401080	0.158202	1.20503	2.92923	-3.6191	0.000295629	0.00326593	yes
NM_176832	Spire1	chr18:67647862-67712375	3.03831	9.37264	1.62519	-3.61437	0.000301081	0.00331726	yes
NM_172443	Tbc1d16	chr11:119004356-119089813	2.39957	6.37656	1.41	-3.61434	0.000301109	0.00331743	yes
NM_011340	Serpinf1	chr11:75223530-75236125	0.325294	2.00885	2.62655	-3.61386	0.000301666	0.00332273	yes
NM_144920	Plekha5	chr6:140372619-140543427	5.41333	12.803	1.2419	-3.61234	0.000303451	0.00333949	yes
NM_031393	Sytl1	chr4:132809004-132819002	0.694057	3.26522	2.23405	-3.6116	0.000304312	0.00334774	yes
NM_001024602	Cep170b	chr12:113960384-113984802	6.51684	15.1511	1.21717	-3.60436	0.00031292	0.00343015	yes
NM_013819	H2-M3	chr17:37407178-37411430	0.136043	1.17773	3.11388	-3.60358	0.000313858	0.00343935	yes
NM_028994	Pck2	chr14:56159102-56168854	22.0111	50.1777	1.18882	-3.58662	0.000334993	0.00363536	yes
NM_029658	Fam101b	chr11:75832696-75841284	0.243945	1.26274	2.37193	-3.58583	0.000336007	0.00364414	yes
NM_175259	Shisa4	chr1:137268032-137271640	0.579559	3.13434	2.43514	-3.5823	0.000340579	0.00368726	yes
NM_008420	Kcnb1	chr2:166921468-167014318	0.0985498	0.468418	2.24887	-3.58193	0.000341059	0.00369171	yes
NM_027309	Lysmd2	chr9:75473538-75485580	1.38136	6.26927	2.1822	-3.58042	0.000343044	0.00371004	yes
NM_001163793	C530008M17Rik	chr5:77269623-77302579	0.234894	1.07313	2.19173	-3.57958	0.000344147	0.00372022	yes
NM_001252095	Mettl20	chr6:149090034-149099692	1.03566	6.34371	2.61478	-3.5765	0.000348227	0.00375707	yes
NM_011161	Mapk11	chr15:88972913-88980036	0.853212	3.65352	2.09831	-3.57433	0.000351131	0.00378426	yes
NM_016905	Galk1	chr11:115836038-115874033	26.5555	62.4445	1.23356	-3.57245	0.000353662	0.00380679	yes
NM_207215	Mycbp2	chr14:103512627-103746017	4.6254	10.2306	1.14524	-3.57098	0.000355653	0.00382522	yes
NM_020043	Igdcc4	chr9:64949292-64985754	0.333661	4.55718	3.77169	-3.56911	0.000358196	0.00384965	yes
NM_001079824	Hnrnph3	chr10:62442970-62486597	7.60175	27.9282	1.87732	-3.5665	0.000361776	0.0038819	yes
NM_023045	Xpo7	chr14:71054052-71166435	5.32639	11.6168	1.12498	-3.56579	0.000362758	0.00389036	yes
NM_021050	Cftr	chr6:18120686-18272769	0.00392817	0.218429	5.79716	-3.56576	0.000362797	0.00389069	yes
NM_028326	Zfp618	chr4:62626607-62795064	0.0442162	0.450757	3.3497	-3.55787	0.000373871	0.00399346	yes
NM_011386	Skil	chr3:30993979-31021845	3.47236	14.7362	2.08537	-3.5557	0.000376968	0.00402156	yes
NM_001146349	Rnf217	chr10:31221692-31329531	0.71963	3.05381	2.08528	-3.55534	0.000377486	0.0040262	yes
NM_008748	Dusp8	chr7:149265391-149281189	0.0334177	0.364373	3.44673	-3.55521	0.000377682	0.00402775	yes
NM_177261	Kndc1	chr7:147080594-147127439	0.233741	1.05555	2.17502	-3.55421	0.000379119	0.00404127	yes
NM_001276402	Lef1	chr3:130813214-130927275	1.7325	6.96644	2.00757	-3.54989	0.000385391	0.00410026	yes
NM_172381	AI314180	chr4:58812902-58925597	8.09963	17.9067	1.14457	-3.54862	0.00038725	0.00411614	yes
NM_026967	Rhebl1	chr15:98708190-98711845	10.9005	29.8682	1.45421	-3.54098	0.000398636	0.00421626	yes
NM_021568	Pcbp3	chr10:76224598-76424692	1.95618	7.15442	1.87079	-3.54014	0.000399908	0.00422758	yes
NM_207663	Synm	chr7:74875046-74904628	0.145177	1.80253	3.63413	-3.53783	0.000403433	0.00425824	yes
NM_133183	Cacng6	chr7:3425422-3435658	0.278008	2.28891	3.04146	-3.53714	0.000404488	0.00426804	yes
NM_011206	Ptpn18	chr1:34516590-34530624	0.262738	1.60095	2.60724	-3.53662	0.000405288	0.00427546	yes
NM_001135198	Ccdc36	chr9:108305963-108330813	0.372727	1.78993	2.26371	-3.53407	0.000409207	0.00431115	yes
NM_026832	Cgrrf1	chr14:47451918-47473865	1.39687	6.32497	2.17886	-3.53312	0.000410685	0.00432416	yes
NM_011276	Rlim	chrX:101152505-101176623	20.8991	46.4019	1.15074	-3.52954	0.000416283	0.00437442	yes
NM_008915	Ppp3cc	chr14:70617704-70689256	0.320739	1.70146	2.4073	-3.52878	0.000417477	0.00438429	yes
NM_010661	Krt12	chr11:99276977-99283573	0.0103357	0.51613	5.64203	-3.52369	0.000425583	0.00445774	yes
NM_021409	Pard6b	chr2:167906503-167926703	3.22826	9.05045	1.48723	-3.52284	0.000426944	0.00447037	yes
NM_028974	Kbtbd13	chr9:65236490-65239459	0.0873097	0.616932	2.8209	-3.51985	0.000431796	0.00451432	yes
NR_029441	2810454H06Rik	chr6:134847978-134850803	0.289758	1.43969	2.31284	-3.51611	0.000437926	0.0045692	yes
NM_007989	Foxh1	chr15:76498653-76500378	20.1276	47.9932	1.25365	-3.516	0.000438102	0.00457063	yes
NM_001081129	Cntnap3	chr13:64838898-65005196	0.0694992	0.439208	2.65983	-3.51222	0.000444387	0.00462461	yes
NM_001012336	Mdk	chr2:91762345-91772454	40.3275	130.035	1.68907	-3.51095	0.000446504	0.00464259	yes
NM_028176	Cda	chr4:137894442-137923870	0.0123196	3.24931	8.04303	-3.5108	0.000446755	0.00464454	yes
NM_001100462	Tmem221	chr8:74078201-74082770	0.0333135	0.726502	4.44679	-3.50864	0.000450402	0.00467691	yes
NM_025980	Nrarp	chr2:25036277-25038852	0.781673	3.29749	2.07673	-3.50533	0.00045604	0.00472752	yes
NM_010578	Itgb1	chr8:131209553-131257479	25.7533	55.5498	1.10903	-3.50469	0.000457133	0.0047362	yes
NM_172747	Kctd13	chr7:134072392-134089123	2.11366	8.01134	1.9223	-3.50223	0.000461374	0.0047742	yes
NM_001033385	D630037F22Rik	chr10:55734099-55948495	0.882878	2.93268	1.73194	-3.50178	0.000462156	0.00478065	yes
NM_008813	Enpp1	chr10:24361216-24431908	0.0140592	0.27335	4.28116	-3.50122	0.000463138	0.00478967	yes
NM_175400	Sephs1	chr2:4802609-4831602	11.8632	25.6504	1.11249	-3.49695	0.000470603	0.00485657	yes
NM_172962	Ddr1	chr17:35818511-35841084	0.296762	5.14503	4.1158	-3.49667	0.000471101	0.00486056	yes
NM_011987	Pla2g10	chr16:13715149-13739564	1.24874	6.00271	2.26514	-3.49304	0.000477561	0.00491785	yes
NM_028484	1700037C18Rik	chr16:3905797-3908689	0.0661111	0.974144	3.88117	-3.49163	0.000480078	0.00494071	yes
NM_028643	Micu2	chr14:58535116-58618099	3.22534	9.94648	1.62474	-3.49029	0.000482489	0.00496161	yes
NM_011782	Adamts5	chr16:85858401-85901370	0.00119349	0.227429	7.57409	-3.48972	0.000483534	0.00497013	yes
NM_054056	Pawr	chr10:107769244-107851447	18.7125	42.2423	1.17469	-3.48635	0.000489657	0.00502226	yes
NM_024124	Hdac9	chr12:34732446-35601767	0.0197709	0.841858	5.41213	-3.486	0.0004903	0.00502799	yes
NM_013812	Cdk2ap1	chr5:124795447-124804637	4.18851	14.4832	1.78987	-3.48569	0.000490872	0.00503263	yes
NM_027419	2810408A11Rik	chr11:69710859-69714488	1.7988	7.2359	2.00814	-3.48229	0.000497152	0.00508582	yes
NM_001198911	Arhgef2	chr3:88420128-88451974	1.96831	13.5095	2.77895	-3.47903	0.000503229	0.00513884	yes
NM_139294	Braf	chr6:39553236-39675462	3.3187	7.4679	1.17009	-3.47832	0.000504561	0.0051507	yes
NM_019662	Rrad	chr8:107151965-107155221	0.0257679	0.64082	4.63627	-3.47708	0.000506911	0.0051714	yes
NM_001199217	Slc38a3	chr9:107553485-107571299	0.0844257	0.655545	2.95694	-3.47238	0.000515862	0.00524884	yes
NM_025399	Nudt14	chr12:114172943-114180329	9.19349	29.9975	1.70616	-3.47144	0.000517665	0.00526353	yes
NM_177235	Bend6	chr1:33908896-33964466	0.317356	1.60309	2.33668	-3.46925	0.000521912	0.00529889	yes
NM_001085371	Speg	chr1:75371871-75428881	0.100703	1.02532	3.3479	-3.46638	0.000527513	0.00534731	yes
NM_009394	Tnnc2	chr2:164602661-164605234	0.0328142	1.54306	5.55533	-3.46573	0.000528793	0.00535871	yes
NM_008595	Mfng	chr15:78586312-78603875	0.411366	2.06313	2.32634	-3.46499	0.00053025	0.00537122	yes
NM_022987	Zic5	chr14:122858381-122864880	1.9783	6.86043	1.79404	-3.46407	0.000532072	0.0053864	yes
NM_008037	Fosl2	chr5:32438844-32460212	0.076825	0.431126	2.48846	-3.46283	0.00053452	0.00540822	yes
NM_008779	Cntn3	chr6:102113299-102414661	0.0434673	0.310292	2.83562	-3.46219	0.000535799	0.00541878	yes
NM_172752	Sorbs2	chr8:46593141-46913260	0.0164973	0.200905	3.60621	-3.45887	0.00054245	0.00547606	yes
NM_144847	Nrbp2	chr15:75916023-75920443	0.367747	1.73214	2.23577	-3.45714	0.000545949	0.0055055	yes
NM_001081171	Lama5	chr2:179911077-179960564	14.0996	30.8142	1.12794	-3.4563	0.000547651	0.00552024	yes
NM_178406	Gpr153	chr4:151648470-151659446	0.161449	0.839158	2.37787	-3.44973	0.000561142	0.00563632	yes
NM_001126047	Sema4c	chr1:36605484-36615226	0.811304	3.05683	1.91372	-3.44965	0.000561318	0.00563773	yes
NM_018741	Igfbpl1	chr4:45822378-45839699	0.205194	1.11301	2.43941	-3.44959	0.00056144	0.00563849	yes
NM_026025	Zcrb1	chr15:93216543-93228721	9.78264	30.3277	1.63234	-3.44677	0.000567333	0.00568879	yes
NM_133829	Mfsd6	chr1:52713147-52784162	0.462805	1.87451	2.01804	-3.44612	0.000568691	0.00570086	yes
NM_177708	Rtn4rl1	chr11:75007494-75081264	0.45373	1.98358	2.1282	-3.44456	0.000571985	0.00573032	yes
NM_145840	Rgs9bp	chr7:36364012-36370601	0.822979	2.69803	1.71298	-3.44398	0.000573209	0.00574163	yes
NM_001033206	Pwwp2b	chr7:146434380-146453152	0.227824	1.98088	3.12015	-3.44337	0.000574509	0.00575309	yes
NM_013881	Ulk2	chr11:61589099-61668594	0.800454	2.72347	1.76656	-3.44299	0.000575324	0.00575994	yes
NM_207681	Bcl2l11	chr2:127951773-127988283	0.617797	3.89673	2.65706	-3.43926	0.000583312	0.00582721	yes
NM_010437	Hivep2	chr10:13686184-13871184	0.435783	1.50964	1.79252	-3.43892	0.000584035	0.00583383	yes
NM_057172	Fubp1	chr3:151873421-151899794	20.8398	44.6518	1.09938	-3.4371	0.000587977	0.00586628	yes
NR_015555	4933404O12Rik	chr5:137395015-137412979	2.2064	6.37879	1.53159	-3.43577	0.000590863	0.00588972	yes
NM_001038018	Grk6	chr13:55546432-55562288	11.7652	31.8132	1.4351	-3.43359	0.000595646	0.00593188	yes
NM_172913	Tox3	chr8:92771010-92872151	0.218142	1.12361	2.36481	-3.43245	0.000598149	0.00595189	yes
NM_013683	Tap1	chr17:34324500-34334170	1.07366	4.042	1.91254	-3.42972	0.000604203	0.00600333	yes
NM_010585	Itpr1	chr6:108163089-108501110	6.08425	13.0878	1.10507	-3.42564	0.00061336	0.00608067	yes
NM_153103	Kif1c	chr11:70514049-70545472	6.28542	13.8932	1.1443	-3.42521	0.000614323	0.00608821	yes
NM_011594	Timp2	chr11:118162374-118216725	0.237619	1.1671	2.2962	-3.42396	0.000617163	0.00611171	yes
NM_145920	Evc2	chr5:37729716-37816293	0.916736	3.30887	1.85176	-3.42321	0.000618865	0.0061263	yes
NM_175126	Zcchc3	chr2:152237691-152240780	8.09387	18.924	1.22532	-3.42241	0.000620692	0.00614123	yes
NM_001081020	Adamts6	chr13:105077952-105284843	0.00203362	0.349855	7.42657	-3.42176	0.000622182	0.00615395	yes
NM_031373	Ogfr	chr2:180324111-180330542	12.8054	29.0895	1.18375	-3.41637	0.000634624	0.00625777	yes
NM_029604	Pifo	chr3:105799874-105817564	0.0340634	1.03976	4.93188	-3.41427	0.000639539	0.00629864	yes
NM_026376	Plxnd1	chr6:115904828-115945023	0.180475	0.787488	2.12546	-3.40989	0.000649894	0.00638555	yes
NM_001081344	Stxbp5	chr10:9475344-9620838	0.6297	2.01084	1.67506	-3.40505	0.000661527	0.00648289	yes
NM_026977	Cnppd1	chr1:75131788-75138942	2.44592	7.54298	1.62475	-3.40222	0.000668398	0.00654119	yes
NM_009902	Cldn3	chr5:135462083-135477220	2.94101	10.9139	1.89179	-3.40036	0.000672962	0.00657792	yes
NM_027875	Syde1	chr10:78047247-78054709	0.817774	3.33115	2.02624	-3.39967	0.000674681	0.00659025	yes
NM_183188	Rbfox1	chr16:5884885-7412573	0.0113439	0.249629	4.4598	-3.39624	0.000683197	0.00666035	yes
NM_198306	Galnt9	chr5:110973373-111050402	0.0310155	0.375174	3.5965	-3.39618	0.000683344	0.00666151	yes
NM_028979	Cyp2j9	chr4:96235119-96258176	0.474436	2.18572	2.20382	-3.39543	0.000685216	0.00667585	yes
NM_172409	Fmnl2	chr2:52716901-52993236	3.77615	8.75472	1.21315	-3.39534	0.000685442	0.00667787	yes
NM_177841	4932418E24Rik	chr2:26127166-26150077	0.00903889	0.259997	4.8462	-3.39108	0.000696178	0.00676952	yes
NM_010500	Ier5	chr1:156943496-156946766	1.10068	3.92074	1.83273	-3.38935	0.000700596	0.0068059	yes
NM_145538	Tmem189	chr2:167468724-167487044	8.92169	22.5265	1.33623	-3.38249	0.00071833	0.00695338	yes
NM_010158	Khdrbs3	chr15:68758849-68923948	10.4248	24.8129	1.25108	-3.38188	0.000719921	0.00696697	yes
NM_153776	Tmem121	chr12:114424113-114427733	1.15039	4.81528	2.0655	-3.37971	0.000725623	0.00701174	yes
NM_177390	Myo1d	chr11:80295628-80593527	0.339346	1.3625	2.00543	-3.3732	0.000743013	0.00715008	yes
NR_030690	E330033B04Rik	chr15:96098994-96105706	0.0961657	0.476922	2.31016	-3.37271	0.000744323	0.00716116	yes
NM_172751	Arhgef10	chr8:14911662-15001085	0.45296	2.1613	2.25444	-3.37221	0.000745665	0.00717221	yes
NM_001252505	St6gal1	chr16:23224812-23360423	0.462403	4.81918	3.38156	-3.37204	0.000746142	0.00717594	yes
NM_172993	Zfp512	chr5:31754808-31784126	11.6351	25.1644	1.1129	-3.36942	0.000753273	0.00723471	yes
NM_133190	Cacng8	chr7:3394458-3415366	0.0982018	1.32207	3.7509	-3.36937	0.00075339	0.00723541	yes
NM_194355	Spire1	chr18:67647862-67712375	1.4374	6.12001	2.09007	-3.36781	0.00075767	0.00727	yes
NM_001081279	Mfhas1	chr8:36645556-36742503	0.469507	1.75116	1.89909	-3.36708	0.000759697	0.00728583	yes
NM_001166398	Armcx2	chrX:131338680-131343760	2.99379	10.8402	1.85635	-3.36652	0.000761221	0.00729769	yes
NM_001112796	Bicd1	chr6:149357505-149511848	0.331685	1.92946	2.54031	-3.36331	0.00077013	0.00736904	yes
NM_011950	Mapk13	chr17:28906261-28915649	3.63747	12.0667	1.73003	-3.36019	0.000778894	0.00743971	yes
NM_172668	Lrp4	chr2:91297687-91354058	1.49339	4.08817	1.45286	-3.35989	0.000779729	0.00744656	yes
NM_053253	Zmynd10	chr9:107449640-107453650	0.0860989	0.722196	3.06832	-3.35947	0.000780911	0.00745622	yes
NM_001163622	Prepl	chr17:85427686-85489614	6.69163	16.0417	1.26139	-3.35928	0.000781446	0.00746029	yes
NM_029005	Mlkl	chr8:113835699-113861803	0.0742653	0.684036	3.20331	-3.35476	0.000794331	0.00756504	yes
NM_019681	Ncs1	chr2:31101442-31150991	1.76342	5.2326	1.56915	-3.35263	0.000800486	0.00761479	yes
NM_010496	Id2	chr12:25778663-25780957	0.354673	1.93969	2.45126	-3.35243	0.000801056	0.007619	yes
NM_001033954	Calca	chr7:121774991-121779871	1.23338	10.5225	3.09279	-3.35153	0.000803665	0.00763961	yes
NM_198408	Crhbp	chr13:96201330-96214786	0.0220645	0.504167	4.5141	-3.35125	0.000804489	0.00764622	yes
NM_009778	C3	chr17:57343395-57367559	0.0076258	0.263059	5.10836	-3.35114	0.000804795	0.00764869	yes
NM_023500	Xk	chrX:8849909-8890371	0.414836	1.67301	2.01183	-3.34614	0.000819436	0.00776488	yes
NM_001081033	Pde11a	chr2:75829188-76176710	0.0440081	0.40873	3.21531	-3.3457	0.000820763	0.00777455	yes
NM_009162	Scg5	chr2:113616469-113669248	0.0150272	1.05805	6.13769	-3.34196	0.000831881	0.00786288	yes
NM_173014	Lpcat2	chr8:95379248-95443178	0.0704904	0.534446	2.92255	-3.34097	0.000834849	0.00788645	yes
NM_027644	Prss41	chr17:23973751-23981123	0.43858	2.36931	2.43355	-3.33137	0.00086419	0.00812132	yes
NM_027158	Upk3bl	chr5:136533136-136540194	0.142716	1.27936	3.16421	-3.32397	0.000887445	0.00830829	yes
NM_026385	Pllp	chr8:97198794-97220142	0.151901	0.939491	2.62874	-3.32386	0.000887821	0.00831101	yes
NM_001014974	Ttll4	chr1:74708327-74744547	8.00693	17.5525	1.13236	-3.31993	0.00090041	0.00841041	yes
NM_146052	Lrrc3b	chr14:16190030-16271501	0.144428	0.957349	2.72869	-3.31878	0.000904119	0.00843983	yes
NM_001012477	Cxcl12	chr6:117118552-117131386	0.0091375	1.28891	7.14014	-3.31441	0.000918371	0.00855152	yes
NM_198411	Inf2	chr12:113826994-113853768	0.400902	1.65893	2.04893	-3.31271	0.000923969	0.00859436	yes
NM_019686	Cib2	chr9:54393158-54407886	0.267697	2.05632	2.94139	-3.31199	0.000926338	0.00861257	yes
NM_001277170	Rbm46	chr3:82640444-82680405	0.0685842	0.471601	2.78162	-3.31099	0.000929667	0.00863792	yes
NM_008609	Mmp15	chr8:97876236-97898193	0.682321	2.46074	1.85057	-3.3094	0.000934946	0.00867841	yes
NM_026221	Ppfibp1	chr6:146837015-146980545	6.73487	14.9306	1.14855	-3.30922	0.000935569	0.00868249	yes
NM_027338	Vps36	chr8:23303331-23329069	22.2259	49.4732	1.15441	-3.30686	0.000943497	0.00874111	yes
NM_198191	Pip5kl1	chr2:32431338-32439299	0.355467	1.80308	2.34267	-3.30345	0.000955026	0.0088357	yes
NM_001122893	Fyn	chr10:39089604-39285180	3.12059	8.93177	1.51713	-3.30052	0.00096505	0.00891441	yes
NM_133737	Lancl2	chr6:57652448-57689443	5.88737	13.4333	1.19012	-3.30036	0.000965597	0.00891859	yes
NM_001166397	Armcx2	chrX:131338680-131343760	2.70005	9.96097	1.8833	-3.29917	0.0009697	0.00894993	yes
NM_001025192	Cxadr	chr16:78301915-78360030	5.80737	13.2451	1.1895	-3.29833	0.000972612	0.00897292	yes
NM_001168253	Fam83h	chr15:75831521-75844766	0.255096	3.66747	3.84567	-3.29702	0.000977158	0.00900832	yes
NM_029662	Mfsd2a	chr4:122624093-122638431	0.0392369	0.424658	3.43602	-3.29569	0.00098182	0.00904317	yes
NM_207221	Jmjd1c	chr10:66590005-66719074	12.0408	29.1343	1.27479	-3.29528	0.000983241	0.00905426	yes
NM_138650	Dgkg	chr16:22466641-22657304	0.0791194	0.413439	2.38557	-3.2922	0.000994059	0.00913758	yes
NM_178798	Slc7a6	chr8:108692774-108722604	4.39568	10.5022	1.25653	-3.28994	0.0010021	0.00919817	yes
NM_001033525	Kcnk6	chr7:30006946-30017541	0.346327	1.42286	2.03858	-3.28974	0.00100281	0.00920347	yes
NM_180958	Ccdc79	chr8:106970618-107033787	0.0672203	0.482678	2.84409	-3.28586	0.00101672	0.00931285	yes
NM_178609	E2f7	chr10:110182520-110224440	1.3207	3.81101	1.52888	-3.28295	0.00102727	0.00939364	yes
NM_023320	Plekho1	chr3:95792762-95799762	0.835025	3.55428	2.08967	-3.27944	0.00104015	0.00949339	yes
NM_010221	Fkbp10	chr11:100277007-100302403	0.789069	10.8894	3.78663	-3.27879	0.00104255	0.00951108	yes
NM_025290	Rsph1	chr17:31391964-31414301	1.27674	5.19797	2.02548	-3.27812	0.00104501	0.00952859	yes
NM_001042502	Pitx2	chr3:128902795-128922512	0.324521	1.86736	2.52462	-3.27737	0.00104778	0.00954886	yes
NM_008802	Pde7a	chr3:19123108-19211322	1.31463	5.9112	2.1688	-3.27631	0.00105173	0.00957972	yes
NM_001145162	Ube2ql1	chr13:69841709-69878775	0.0228782	0.351173	3.94014	-3.27487	0.00105711	0.00962252	yes
NM_026555	Rcn3	chr7:52338283-52347583	2.83865	9.66685	1.76784	-3.27434	0.0010591	0.00963812	yes
NM_172659	Slc2a6	chr2:26876884-26883518	0.0428473	0.462725	3.43288	-3.26767	0.00108438	0.00983268	yes
NM_018760	Slc4a4	chr5:89316284-89668681	0.158865	0.929727	2.54901	-3.2673	0.00108578	0.00984377	yes
NM_001277149	Chd7	chr4:8617552-8795596	3.17037	6.69788	1.07905	-3.2613	0.00110904	0.010023	yes
NM_011613	Tnfsf11	chr14:78677252-78707850	0.0207515	0.331998	3.99988	-3.25922	0.00111718	0.0100852	yes
NM_021715	Chst7	chrX:19636695-19674646	0.197614	1.03721	2.39195	-3.25775	0.00112298	0.0101272	yes
NM_009879	Ift81	chr5:123000212-123064527	3.39391	9.00275	1.40742	-3.25773	0.00112306	0.0101277	yes
NM_001160317	Nfasc	chr1:134461266-134638374	0.0650339	1.08342	4.05825	-3.25692	0.00112629	0.0101516	yes
NR_033185	Rcbtb2	chr14:73542316-73583861	1.05745	5.66876	2.42245	-3.25107	0.0011497	0.0103281	yes
NR_045054	2610307P16Rik	chr13:28551902-28977291	0.0279807	1.83896	6.03832	-3.25036	0.00115257	0.0103471	yes
NM_007418	Adra2c	chr5:35621214-35624412	0.0132306	0.322269	4.60632	-3.2495	0.00115609	0.010374	yes
NM_175561	Pcnxl2	chr8:128275407-128422217	0.0500242	0.293109	2.55074	-3.24893	0.0011584	0.0103927	yes
NM_178149	Pik3ip1	chr11:3230733-3242974	1.07456	3.94574	1.87655	-3.24601	0.00117033	0.0104838	yes
NM_001081387	Ctcfl	chr2:172919109-172945026	0.049891	0.386511	2.95366	-3.24588	0.00117087	0.0104877	yes
NM_010059	Dmc1	chr15:79391927-79435539	1.1651	5.07782	2.12375	-3.24352	0.00118063	0.0105629	yes
NM_007559	Bmp8b	chr4:122782407-122803334	0.0430722	0.371212	3.10741	-3.24098	0.0011912	0.0106427	yes
NM_001256195	Eif4g3	chr4:137549370-137762994	1.22948	4.35574	1.82486	-3.23661	0.0012096	0.0107779	yes
NM_027828	Fam110c	chr12:31758832-31764805	0.0421979	0.470471	3.47886	-3.23631	0.00121084	0.0107853	yes
NM_026064	Myl12a	chr17:71343132-71351873	45.8119	93.2239	1.02498	-3.23632	0.00121082	0.0107853	yes
NM_028639	Ttc7	chr17:87682225-87781110	2.30309	6.01281	1.38447	-3.23628	0.00121097	0.0107861	yes
NM_010380	H2-D1	chr17:35400038-35462354	3.41086	10.4105	1.60984	-3.23605	0.00121197	0.0107926	yes
NM_199470	Cdh24	chr14:55250828-55260201	0.486308	1.95811	2.00952	-3.23485	0.00121706	0.0108304	yes
NM_026808	Fitm1	chr14:56194510-56195789	0.0697305	0.940961	3.75427	-3.2348	0.00121726	0.0108316	yes
NM_009255	Serpine2	chr1:79790895-79855240	5.30446	13.9637	1.3964	-3.23404	0.00122054	0.0108558	yes
NM_007498	Atf3	chr1:192994175-193007212	2.09605	6.98446	1.73648	-3.22742	0.00124913	0.0110654	yes
NM_019764	Amotl2	chr9:102620133-102635747	19.9169	40.8144	1.03508	-3.22532	0.00125831	0.0111316	yes
NR_033305	AA388235	chr17:34118436-34122303	0.189131	0.854172	2.17514	-3.22465	0.00126127	0.0111534	yes
NM_153081	Slc16a11	chr11:70027411-70029916	0.0589683	0.554453	3.23305	-3.22375	0.00126523	0.0111821	yes
NM_019790	Tmeff2	chr1:50984366-51244114	0.0599061	0.432024	2.85034	-3.22226	0.00127184	0.0112323	yes
NM_001039214	Mex3c	chr18:73732358-73752232	10.49	21.7767	1.05377	-3.22075	0.00127856	0.0112788	yes
NM_177448	Mogat2	chr7:106367593-106387121	0.5581	2.51596	2.17251	-3.21606	0.00129965	0.011436	yes
NM_172662	Gtdc1	chr2:44419931-44717142	3.67208	9.81491	1.41838	-3.21362	0.00131073	0.0115159	yes
NM_178755	Agbl2	chr2:90622900-90656388	0.105175	0.626721	2.57502	-3.20929	0.00133065	0.0116635	yes
NM_008894	Pold2	chr11:5761868-5778259	40.5545	82.87	1.03099	-3.20722	0.00134025	0.0117318	yes
NM_001271746	Dnmt3b	chr2:153475184-153513466	1.60727	28.6974	4.15824	-3.20499	0.00135069	0.0118074	yes
NM_133703	Fam220a	chr5:144309573-144325393	1.80278	7.37196	2.03182	-3.20464	0.00135234	0.0118185	yes
NM_008439	Khk	chr5:31224267-31233619	1.31854	6.30177	2.25682	-3.20376	0.00135643	0.0118481	yes
NM_026203	Ahi1	chr10:20672352-20800235	1.70711	4.64384	1.44376	-3.20299	0.00136007	0.0118726	yes
NM_016691	Clcn5	chrX:6735537-6896484	0.588802	5.21034	3.14552	-3.19977	0.00137538	0.011982	yes
NM_025921	2610002M06Rik	chrX:104978090-105068250	0.729655	2.33802	1.68	-3.19795	0.00138407	0.0120429	yes
NM_053106	Lmod1	chr1:137221389-137264642	0.0718435	0.423735	2.56023	-3.19757	0.0013859	0.0120563	yes
NM_008129	Gclm	chr3:121948474-121970133	11.5493	25.5623	1.14622	-3.19554	0.00139569	0.0121297	yes
NR_045290	4732491K20Rik	chr17:12511718-12520116	0.0477328	0.365851	2.9382	-3.19528	0.00139693	0.0121394	yes
NM_001081426	Dip2c	chr13:9275770-9668172	3.68191	7.81489	1.08577	-3.19362	0.001405	0.0121995	yes
NM_001271533	Spag16	chr1:69873543-70771706	0.325262	1.3384	2.04083	-3.19132	0.00141625	0.012279	yes
NM_172650	Kctd3	chr1:190794976-190831719	14.0019	28.4483	1.02272	-3.19016	0.00142192	0.0123193	yes
NM_026125	Fam132a	chr4:155336420-155340738	0.592804	2.60363	2.13489	-3.18503	0.00144741	0.0125063	yes
NM_025815	Cpne8	chr15:90317911-90509819	0.157165	0.866522	2.46296	-3.18438	0.00145064	0.0125292	yes
NM_053202	Foxp1	chr6:98875335-99385339	0.193781	1.77071	3.19183	-3.18248	0.00146019	0.0125957	yes
NM_145392	Bag2	chr1:33802328-33814595	1.18106	4.37895	1.89051	-3.17373	0.00150492	0.0129143	yes
NM_133208	Zfp287	chr11:62524987-62542595	0.29455	1.133	1.94356	-3.17272	0.00151019	0.012949	yes
NM_001025438	Camk2d	chr3:126299868-126549244	0.304377	2.28845	2.91044	-3.16908	0.00152921	0.0130869	yes
NM_172671	Lgr4	chr2:109757803-109854414	11.432	23.0347	1.01073	-3.16452	0.00155339	0.0132548	yes
NM_001161769	Lmo4	chr3:143851493-143868219	0.513822	9.00531	4.13143	-3.16202	0.00156677	0.013351	yes
NM_001164564	Egfl7	chr2:26436575-26448202	12.0595	30.2464	1.3266	-3.16084	0.00157312	0.0133973	yes
NM_029801	Tsacc	chr3:88086681-88100760	3.11704	12.6265	2.01821	-3.15969	0.00157937	0.0134434	yes
NM_144512	Slc6a13	chr6:121250313-121287736	0.0142908	0.432844	4.92069	-3.15765	0.00159047	0.013519	yes
NM_022653	Thop1	chr10:80532827-80545105	25.708	51.4961	1.00225	-3.15723	0.00159273	0.0135356	yes
NM_144817	Camk1g	chr1:195172539-195196476	0.00413425	0.478097	6.85353	-3.15166	0.00162343	0.0137488	yes
NM_029947	Prdm8	chr5:98609887-98616467	0.0135833	0.302311	4.47613	-3.15006	0.00163238	0.0138086	yes
NM_009610	Actg2	chr6:83462902-83486245	0.030299	0.522243	4.10738	-3.14908	0.00163787	0.0138466	yes
NM_153509	AF529169	chr9:89484871-89517824	0.105268	0.508333	2.2717	-3.14626	0.00165371	0.0139584	yes
NM_019866	Spib	chr7:51781364-51787441	0.0189129	0.285539	3.91625	-3.14541	0.00165853	0.013994	yes
NM_011808	Ets1	chr9:32503626-32565405	0.251744	1.12291	2.15721	-3.14207	0.00167758	0.0141255	yes
NM_172644	Dars2	chr1:162970743-163000763	9.99178	20.5955	1.04352	-3.14085	0.00168458	0.0141754	yes
NM_199299	Phf15	chr11:51626957-51670983	3.28931	7.28114	1.14638	-3.13934	0.00169331	0.0142357	yes
NM_001081069	Rgs11	chr17:26339906-26348269	0.179444	0.932492	2.37756	-3.13903	0.00169506	0.0142474	yes
NM_001081116	Arhgef17	chr7:108018259-108080675	2.07155	4.54408	1.13328	-3.13481	0.00171964	0.014417	yes
NM_145134	Spsb4	chr9:96843900-96918774	0.173308	0.889187	2.35914	-3.13451	0.00172144	0.0144289	yes
NM_001033465	6430531B16Rik	chr7:147158201-147164654	0.0429565	0.624935	3.86276	-3.13436	0.00172227	0.0144346	yes
NM_133816	Sh3bp4	chr1:90967036-91050368	6.79853	14.5618	1.0989	-3.13365	0.00172648	0.0144651	yes
NM_009168	Shd	chr17:56109904-56116042	0.0416039	0.655152	3.97704	-3.13011	0.00174739	0.0146124	yes
NM_183138	Tet3	chr6:83312367-83391672	0.839918	2.1731	1.37144	-3.12915	0.00175315	0.0146514	yes
NM_177391	Fam109b	chr15:82171608-82176140	0.237249	1.06366	2.16457	-3.12909	0.00175346	0.0146532	yes
NR_029382	Mir17hg	chr14:115443526-115445950	5.82578	14.4726	1.3128	-3.12533	0.00177604	0.0148106	yes
NM_001164658	Catsperg1	chr7:29966550-29999052	0.0798742	0.570529	2.8365	-3.12488	0.00177875	0.0148294	yes
NM_030113	Arhgap10	chr8:79774264-80042477	1.94089	5.64519	1.5403	-3.12298	0.00179028	0.0149088	yes
NM_001081188	Exosc7	chr9:123022348-123045247	28.8005	61.3179	1.09021	-3.12123	0.00180099	0.0149806	yes
NM_207680	Bcl2l11	chr2:127951773-127988283	0.841801	3.51997	2.06401	-3.11728	0.00182531	0.0151515	yes
NM_001198561	H2-Q7	chr17:35576099-35580718	0.146403	1.43716	3.29521	-3.1164	0.00183073	0.0151868	yes
NM_008718	Npas1	chr7:17041069-17062129	0.0132282	0.30213	4.51348	-3.11538	0.00183711	0.0152301	yes
NM_001252588	Tspan4	chr7:148661134-148725756	5.81605	24.1324	2.05286	-3.11517	0.00183836	0.0152384	yes
NM_008858	Prkd1	chr12:51442218-51750210	0.324392	1.24696	1.9426	-3.10633	0.00189427	0.0156213	yes
NM_020606	Parva	chr7:119571219-119735202	1.23881	3.62385	1.54856	-3.10549	0.00189966	0.015659	yes
NM_175408	Tmem139	chr6:42211968-42214554	0.271694	1.58495	2.54438	-3.10547	0.00189979	0.0156596	yes
NM_031163	Col2a1	chr15:97806032-97835155	0.152847	0.638466	2.06252	-3.10434	0.00190701	0.0157092	yes
NM_177225	Samd12	chr15:53293355-53733991	0.574961	2.68763	2.2248	-3.10411	0.0019085	0.0157196	yes
NM_001163574	Tjp1	chr7:72441050-72516130	10.7936	21.8283	1.01602	-3.10389	0.00190996	0.0157285	yes
NM_146240	Rassf9	chr10:101974855-102009194	0.03766	0.446144	3.56641	-3.10077	0.00193021	0.0158629	yes
NM_001081172	Frmpd1	chr4:45197777-45298808	0.0124116	0.246761	4.31335	-3.10068	0.00193075	0.0158656	yes
NR_030694	1110002L01Rik	chr12:3365131-3426747	3.82141	10.5465	1.46459	-3.09441	0.00197208	0.0161505	yes
NM_029049	Ptchd3	chr11:121691531-121704750	0.0149415	0.229988	3.94416	-3.09129	0.00199292	0.0162861	yes
NM_026202	Ccdc50	chr16:27389041-27452304	6.66476	13.5355	1.02212	-3.08943	0.00200538	0.0163682	yes
NM_198438	Ssbp3	chr4:106584074-106722299	1.27982	8.10046	2.66206	-3.08818	0.00201386	0.016423	yes
NM_001030296	Prr7	chr13:55565627-55574516	0.15616	1.19694	2.93825	-3.08797	0.0020153	0.0164317	yes
NM_178214	Hist2h2be	chr3:96025043-96027661	0.15652	0.770541	2.29953	-3.08657	0.0020248	0.0164944	yes
NM_001024539	Shc2	chr10:79080682-79100663	1.38934	4.04021	1.54004	-3.0862	0.00202734	0.0165128	yes
NM_001083334	Bin1	chr18:32518710-32595394	2.60743	8.16723	1.64722	-3.08596	0.00202897	0.0165239	yes
NM_025351	Chchd6	chr6:89333139-89545646	7.10717	20.5942	1.53489	-3.08529	0.00203354	0.016556	yes
NM_001024614	1700007G11Rik	chr5:98758322-99231038	0.0228231	2.72967	6.90209	-3.08292	0.00204981	0.0166624	yes
NM_025549	Arrdc4	chr7:75881879-75894124	7.91281	34.0469	2.10526	-3.08275	0.00205099	0.0166697	yes
NM_177335	D930020B18Rik	chr10:121078756-121130970	0.0165292	0.207101	3.64725	-3.08253	0.00205252	0.0166805	yes
NM_010251	Gabra4	chr5:71960972-72049547	0.00478454	0.202696	5.40479	-3.08209	0.00205553	0.0167027	yes
NM_010729	Loxl1	chr9:58135529-58161019	0.24192	0.996813	2.04279	-3.08183	0.00205731	0.0167149	yes
NM_001048207	Gypc	chr18:32687973-32719688	0.0126337	0.275959	4.4491	-3.08144	0.00206004	0.0167309	yes
NM_026604	Fam135a	chr1:24017596-24107180	2.28944	5.26232	1.20071	-3.07625	0.00209625	0.0169786	yes
NM_026029	Glod4	chr11:76033896-76057201	17.7321	35.669	1.00831	-3.07565	0.00210043	0.0170071	yes
NM_008873	Plau	chr14:21655883-21662610	0.0839093	0.520516	2.63304	-3.07292	0.00211973	0.0171383	yes
NM_011522	Syngr3	chr17:24822036-24826894	0.594672	2.36362	1.99083	-3.07217	0.00212508	0.0171743	yes
NM_001164627	Arhgap8	chr15:84545058-84602637	0.732093	7.70952	3.39654	-3.06962	0.00214335	0.0172962	yes
NM_013505	Dsc2	chr18:20189298-20218006	0.579239	1.95269	1.75323	-3.06813	0.00215403	0.017367	yes
NM_172604	Scara3	chr14:66538231-66572581	0.00743265	0.240795	5.01779	-3.06656	0.00216541	0.0174472	yes
NM_011514	Suv39h1	chrX:7638296-7651886	2.52971	8.0434	1.66883	-3.066	0.00216944	0.0174746	yes
NM_134469	Fdps	chr3:88897509-88905889	72.4223	143.992	0.991483	-3.06496	0.00217701	0.0175241	yes
NM_175427	Fam163b	chr2:26965898-26997997	0.012058	0.213081	4.14334	-3.06328	0.00218925	0.0176039	yes
NM_170779	Wwc1	chr11:35652679-35793591	5.54469	12.3	1.14949	-3.06227	0.00219666	0.0176548	yes
NM_001039466	Trim46	chr3:89038098-89049819	0.0399307	0.671603	4.07204	-3.06148	0.00220249	0.0176909	yes
NM_025327	Krtcap2	chr3:89050359-89053644	50.4139	111.445	1.14444	-3.06112	0.00220511	0.0177078	yes
NM_178754	Arhgap6	chrX:165233030-165742372	0.00692306	0.23527	5.08676	-3.06055	0.00220931	0.0177359	yes
NM_001037927	Wdr93	chr7:86888048-86930836	0.283014	1.21182	2.09823	-3.05749	0.00223197	0.0178911	yes
NM_001001804	Ephx4	chr5:107832531-107859050	0.0405006	0.549403	3.76185	-3.05361	0.00226104	0.018087	yes
NM_177192	Dennd5b	chr6:148936590-149050202	0.862837	2.2257	1.3671	-3.05257	0.00226892	0.0181375	yes
NM_001164518	Iglon5	chr7:50728276-50745393	0.013954	0.244637	4.13189	-3.05234	0.00227066	0.0181475	yes
NM_029153	Scamp1	chr13:94971387-95055236	4.35446	9.898	1.18464	-3.05018	0.00228707	0.018259	yes
NM_001002272	Tro	chrX:147079252-147092126	3.18368	7.07748	1.15254	-3.04882	0.00229744	0.0183278	yes
NM_008716	Notch3	chr17:32257837-32303797	5.6414	11.3839	1.01287	-3.04727	0.00230928	0.0184069	yes
NM_019440	Irgm2	chr11:58028478-58036285	0.491312	1.86011	1.92067	-3.04552	0.00232276	0.0184986	yes
NM_001034881	Gm5464	chr14:67487686-67489842	0.0771884	0.650665	3.07546	-3.04441	0.00233133	0.0185552	yes
NM_001164791	B230120H23Rik	chr2:72123693-72280667	3.57741	8.42533	1.23582	-3.04287	0.00234333	0.0186307	yes
NM_175089	Nek1	chr8:63471989-63610143	3.16581	7.79405	1.2998	-3.03831	0.00237908	0.0188643	yes
NM_148935	Foxn4	chr5:114704172-114723770	0.0870597	0.499497	2.5204	-3.03783	0.00238285	0.0188852	yes
NM_025992	Herc6	chr6:57530985-57615130	0.149621	0.604555	2.01456	-3.03731	0.00238703	0.0189096	yes
NM_019487	Hebp2	chr10:18259928-18265882	0.700135	2.71806	1.95687	-3.03645	0.00239381	0.0189546	yes
NM_021452	Kcnmb4	chr10:115854923-115910579	0.0543379	0.844181	3.95752	-3.03436	0.00241045	0.0190616	yes
NM_025682	Pspc1	chr14:57341285-57397153	29.2642	57.8419	0.982982	-3.02984	0.0024468	0.0192991	yes
NM_134163	Mbnl3	chrX:48466670-48559009	0.237103	0.813688	1.77896	-3.02846	0.00245803	0.0193705	yes
NM_177230	Ccdc158	chr5:93037320-93104153	0.0829613	0.425759	2.35953	-3.02719	0.0024684	0.0194377	yes
NM_026582	Wls	chr3:159502658-159598139	3.38778	9.09097	1.42409	-3.02504	0.00248604	0.0195552	yes
NM_177735	Tmem130	chr5:145496783-145522447	0.139546	0.677397	2.27926	-3.02493	0.00248695	0.0195597	yes
NM_133710	Ctdspl	chr9:118835653-118953237	0.241607	0.91362	1.91893	-3.02492	0.00248699	0.0195597	yes
NM_001081376	Chd5	chr4:151712759-151764303	0.210122	0.971846	2.2095	-3.02335	0.00249991	0.0196432	yes
NM_011162	Mapk8ip1	chr2:92223832-92241420	2.83341	7.68484	1.43948	-3.02302	0.00250264	0.0196589	yes
NM_013603	Mt3	chr8:96676506-96678048	0.255544	2.06308	3.01316	-3.01819	0.00254289	0.0199263	yes
NM_021716	Fign	chr2:63809564-63936095	0.0560226	0.616601	3.46026	-3.01679	0.00255467	0.020002	yes
NM_009711	Artn	chr4:117598764-117602368	0.0235582	0.438994	4.2199	-3.01657	0.00255654	0.0200141	yes
NM_011585	Tia1	chr6:86354212-86383399	4.79057	10.6051	1.14649	-3.01654	0.00255675	0.0200151	yes
NM_178283	Asb13	chr13:3633277-3651025	0.607054	2.2881	1.91426	-3.01402	0.00257811	0.0201496	yes
NM_178799	Acad12	chr5:122048289-122068947	0.649035	2.33455	1.84678	-3.01351	0.00258243	0.0201765	yes
NM_001011732	Xkr7	chr2:152857587-152881511	0.0575172	0.378094	2.71668	-3.01252	0.0025909	0.020227	yes
NR_045046	2610035F20Rik	chr14:122869598-122874421	0.0758902	0.755321	3.31511	-3.01105	0.00260346	0.020305	yes
NM_009618	Adam2	chr14:66646165-66696570	0.00396483	0.372115	6.55235	-3.00971	0.00261498	0.0203784	yes
NM_024414	Stx1b	chr7:134950357-134968045	0.0515721	0.530571	3.36288	-3.00876	0.00262313	0.0204308	yes
NM_134188	Acot2	chr12:85328810-85334825	0.754846	2.67635	1.82601	-3.00548	0.00265159	0.0206157	yes
NM_181548	Eras	chrX:7496947-7505733	2.16906	8.21025	1.92036	-2.99887	0.00270983	0.020983	yes
NM_183276	Nbeal2	chr9:110527292-110556665	0.690318	1.89193	1.45453	-2.99829	0.00271498	0.0210114	yes
NR_038860	Fam187b	chr7:31758822-31774744	0.0562695	0.764843	3.76474	-2.9964	0.00273188	0.0211167	yes
NM_008287	Hrsp12	chr15:34413776-34425001	13.462	31.965	1.2476	-2.99576	0.00273764	0.02115	yes
NM_130889	Anp32b	chr4:46463988-46485395	58.0112	111.541	0.943167	-2.99556	0.00273941	0.021159	yes
NM_009980	Ctbp2	chr7:140178693-140315166	51.8559	101.658	0.971151	-2.99501	0.00274439	0.0211876	yes
NM_019510	Trpc3	chr3:36519403-36589089	0.0293396	0.223421	2.92885	-2.99201	0.00277148	0.0213619	yes
NM_027257	Nabp2	chr10:127838450-127846852	15.21	34.6176	1.18649	-2.99067	0.00278362	0.0214405	yes
NM_010723	Lmo4	chr3:143851493-143868219	1.35272	6.02412	2.15488	-2.99052	0.00278503	0.0214495	yes
NM_031260	Mov10l1	chr15:88813423-88885582	0.600341	2.01422	1.74637	-2.99004	0.00278941	0.0214781	yes
NM_009655	Alcam	chr16:52249108-52453110	0.160848	0.630812	1.97151	-2.98823	0.00280595	0.0215865	yes
NM_028887	Smchd1	chr17:71693833-71824683	15.5269	29.8184	0.941431	-2.98747	0.00281293	0.0216278	yes
NM_010568	Insr	chr8:3150921-3279617	2.1271	4.54318	1.09481	-2.98657	0.00282124	0.0216807	yes
NM_008471	Krt19	chr11:100002125-100007233	0.443627	1.99709	2.17048	-2.98526	0.00283342	0.0217555	yes
NM_172587	Cdc14b	chr13:64293852-64376296	0.769466	4.18496	2.44329	-2.98502	0.00283562	0.0217693	yes
NM_025846	Rras2	chr7:121190295-121261295	13.5865	27.5005	1.01728	-2.98126	0.00287063	0.0219877	yes
NM_001199283	Slc43a2	chr11:75345195-75391074	0.502736	2.40306	2.257	-2.98091	0.0028739	0.0220103	yes
NM_148941	Elovl4	chr9:83672298-83699912	1.15002	3.5872	1.6412	-2.97668	0.00291393	0.0222543	yes
NM_015787	Hist1h1e	chr13:23713645-23714427	294.789	596.854	1.0177	-2.97542	0.00292586	0.0223295	yes
NM_025382	Tmem57	chr4:134358675-134409260	9.05361	18.0012	0.991526	-2.97355	0.00294381	0.0224459	yes
NR_002848	6430411K18Rik	chr12:110828378-110833613	4.60426	13.8005	1.58368	-2.9725	0.00295384	0.022508	yes
NM_001001488	Atp8b1	chr18:64688632-64820654	0.0599779	0.286995	2.25852	-2.96918	0.00298595	0.0227191	yes
NM_175528	E330009J07Rik	chr6:40357496-40386132	0.916278	3.183	1.79653	-2.96488	0.00302798	0.0229812	yes
NM_001031811	Kcnh8	chr17:53092465-53121330	0.149626	0.737454	2.3012	-2.96273	0.00304922	0.0231159	yes
NM_001001806	Zfp36l2	chr17:84583268-84587287	3.22093	7.6435	1.24676	-2.96055	0.00307089	0.0232483	yes
NM_011817	Gadd45g	chr13:51942043-51943843	0.581969	2.81102	2.27208	-2.95914	0.00308499	0.0233333	yes
NM_019395	Fbp1	chr13:62966112-62989642	0.515825	2.07128	2.00556	-2.95601	0.00311651	0.0235302	yes
NM_028266	Col16a1	chr4:129725083-129776521	0.0323956	0.213934	2.72329	-2.95366	0.0031403	0.023678	yes
NM_001081289	Fam217b	chr2:178149238-178156866	0.110271	0.604251	2.45409	-2.95365	0.00314044	0.0236783	yes
NM_009052	Bex1	chrX:132748510-132750052	87.3581	167.309	0.937502	-2.95286	0.00314845	0.0237271	yes
NM_173760	Ppip5k2	chr1:99602619-99666669	11.7395	22.3962	0.931889	-2.94986	0.00317922	0.0239165	yes
NM_001167763	Ift122	chr6:115803545-115876717	2.50779	6.32863	1.33548	-2.94274	0.00325319	0.0243718	yes
NM_028711	Slc25a27	chr17:43778848-43803964	0.595975	2.15268	1.85281	-2.94146	0.00326664	0.0244528	yes
NM_146251	Pnpla7	chr2:24831552-24909592	1.96513	4.84612	1.30221	-2.94127	0.00326872	0.0244657	yes
NM_183186	Foxn3	chr12:100433303-100688284	9.82307	20.0823	1.03168	-2.94118	0.00326965	0.0244705	yes
NM_021292	Evc	chr5:37690409-37728120	0.648019	2.1241	1.71275	-2.94044	0.00327748	0.0245119	yes
NM_177055	A630001G21Rik	chr1:87613657-87633181	0.224685	1.01779	2.17946	-2.93939	0.00328863	0.0245777	yes
NM_001033352	Klhl21	chr4:151382999-151391786	3.99739	8.84944	1.14653	-2.93871	0.00329582	0.0246237	yes
NM_001081407	Plb1	chr5:32535080-32666729	0.0609512	0.376423	2.62663	-2.93405	0.00334575	0.0249351	yes
NR_027924	2010204K13Rik	chrX:6988942-7000114	2.96293	13.6286	2.20155	-2.93257	0.00336166	0.0250317	yes
NM_016797	Stx7	chr10:23869122-23908765	6.88995	15.0205	1.12436	-2.932	0.00336783	0.0250687	yes
NM_001033366	Dpcr1	chr17:35772699-35780640	0.0104379	0.198341	4.24808	-2.93115	0.0033771	0.0251245	yes
NM_001033208	Myzap	chr9:71352153-71440167	0.0800719	0.490439	2.61471	-2.92905	0.00339997	0.0252648	yes
NM_013533	Gpr162	chr6:124808462-124813935	0.401164	1.49691	1.89972	-2.92855	0.00340543	0.0252982	yes
NM_026864	Rasl11a	chr5:147656646-147659302	0.359099	1.65755	2.2066	-2.92741	0.00341799	0.0253751	yes
NM_201374	Ccdc155	chr7:52439045-52460262	0.341322	1.34899	1.98267	-2.92709	0.00342151	0.025395	yes
NM_027629	Pgm2l1	chr7:107376116-107427382	0.806009	2.10448	1.3846	-2.92615	0.00343186	0.0254592	yes
NM_138649	Syt17	chr7:125525369-125587066	0.117626	0.730383	2.63445	-2.925	0.00344456	0.025537	yes
NM_011438	Sox12	chr2:152219347-152223782	4.24155	9.12244	1.10483	-2.9246	0.00344903	0.0255638	yes
NM_139145	Hlcs	chr16:94350911-94509463	1.45639	3.78579	1.3782	-2.92248	0.00347256	0.0257024	yes
NM_001252072	Hs3st4	chr7:131126694-131542503	0.0341333	0.275065	3.01052	-2.92235	0.00347398	0.02571	yes
NM_133969	Cyp4v3	chr8:46391155-46418550	0.0350431	0.266569	2.92731	-2.92153	0.00348315	0.0257657	yes
NM_001009947	Dock11	chrX:33428826-33616557	7.60488	14.5457	0.935598	-2.9171	0.00353301	0.0260658	yes
NM_001081120	Fam89a	chr8:127264156-127275709	0.17485	0.961357	2.45895	-2.91533	0.00355308	0.0261897	yes
NM_026526	N6amt2	chr14:58168434-58190406	13.9361	33.5722	1.26844	-2.91478	0.00355939	0.0262264	yes
NM_175386	Lhfp	chr3:52845468-53065601	0.20238	0.895674	2.1459	-2.91435	0.00356426	0.0262562	yes
NM_001177715	Gm2897	chr14:3049284-3077025	0.0396949	0.476656	3.58592	-2.91129	0.00359938	0.0264728	yes
NM_147776	Vwa1	chr4:155142603-155148670	0.107065	0.502651	2.23107	-2.90912	0.00362443	0.0266282	yes
NM_026352	Ppid	chr3:79395310-79407572	49.8195	93.7574	0.912221	-2.90612	0.00365944	0.0268437	yes
NM_022982	Rtn4r	chr16:18127798-18152501	0.0596002	0.442968	2.89381	-2.89857	0.00374865	0.0273724	yes
NM_021885	Tub	chr7:116154393-116226838	0.349126	3.27405	3.22926	-2.89568	0.00378336	0.0275783	yes
NM_019651	Ptpn9	chr9:56842774-56919773	2.6058	6.17659	1.24508	-2.89343	0.00381059	0.0277415	yes
NM_153068	Ehd2	chr7:16534335-16552884	0.0710478	0.384428	2.43585	-2.89219	0.00382567	0.0278294	yes
NM_026021	Zmynd19	chr2:24805321-24814933	28.2672	55.694	0.978395	-2.88995	0.00385308	0.0279896	yes
NM_026981	Dtwd1	chr2:125977876-125991013	4.26924	11.7298	1.45813	-2.88848	0.00387105	0.0280976	yes
NM_145492	Zfp521	chr18:13845522-14131242	0.375978	1.20033	1.67472	-2.88823	0.00387412	0.0281166	yes
NM_175170	Pogk	chr1:168309297-168339959	0.0822378	1.61974	4.29981	-2.8866	0.00389434	0.0282295	yes
NM_019919	Ltbp1	chr17:75404868-75792307	1.23969	2.94913	1.25031	-2.88659	0.00389436	0.0282295	yes
NM_001198565	Sulf1	chr1:12682510-12850453	5.34727	13.485	1.33448	-2.88327	0.00393574	0.0284734	yes
NM_001276489	Ism1	chr2:139503913-139584317	0.0283609	0.233379	3.0407	-2.88306	0.00393828	0.028488	yes
NM_134080	Flnb	chr14:8650470-8784101	24.4336	51.666	1.08035	-2.88179	0.00395421	0.0285826	yes
NM_028162	Tbc1d5	chr17:50872451-51318677	1.60171	4.17558	1.38236	-2.88096	0.00396469	0.0286459	yes
NM_001160345	Svip	chr7:59252530-59261388	1.88949	5.07754	1.42614	-2.88094	0.00396485	0.0286462	yes
NM_134138	Psmg2	chr18:67801252-67813816	23.6826	48.6784	1.03946	-2.87868	0.00399348	0.028806	yes
NM_001024136	Anks6	chr4:47028560-47070178	0.129556	0.547527	2.07936	-2.87719	0.00401239	0.0289203	yes
NM_133948	Psip1	chr4:83101584-83132352	30.8889	71.1174	1.20311	-2.87683	0.00401686	0.0289465	yes
NM_009946	Cplx2	chr13:54472712-54485278	0.0978451	0.449082	2.19841	-2.87458	0.00404561	0.0291142	yes
NM_028440	Abracl	chr10:17731066-17743058	13.9029	33.4761	1.26775	-2.87424	0.00405007	0.0291419	yes
NM_007484	Rhoc	chr3:104591951-104597377	12.5304	29.2481	1.22291	-2.87356	0.00405877	0.0291875	yes
NM_177129	Cntn2	chr1:134406001-134439517	0.273565	0.861177	1.65443	-2.87321	0.00406327	0.0292116	yes
NM_025273	Pcbd1	chr10:60552078-60557077	2.11413	7.21377	1.77069	-2.87064	0.00409643	0.0294	yes
NM_030021	D730039F16Rik	chr2:34729955-34747653	0.0281483	0.267642	3.24918	-2.86992	0.00410581	0.029456	yes
NM_153508	Clstn3	chr6:124380773-124414802	1.70299	4.40621	1.37147	-2.86834	0.00412637	0.0295745	yes
NM_172545	Ehmt1	chr2:24646288-24775129	8.92271	18.1843	1.02714	-2.86806	0.00412999	0.0295951	yes
NM_029428	Adad2	chr8:122136646-122140826	0.266135	1.11761	2.07019	-2.86512	0.00416854	0.0298213	yes
NM_001005740	Phactr1	chr13:42775991-43233881	0.0279155	0.630409	4.49715	-2.86319	0.00419405	0.0299677	yes
NM_133351	Prss8	chr7:135056030-135073627	2.51421	12.2666	2.28656	-2.86254	0.00420258	0.0300145	yes
NM_133214	Smco4	chr9:15309938-15349703	3.65687	11.1885	1.61334	-2.86225	0.00420649	0.0300363	yes
NM_022410	Myh9	chr15:77591014-77672605	27.8452	53.6843	0.947071	-2.86173	0.00421342	0.0300764	yes
NM_029182	Rasd2	chr8:77737842-77748012	0.715461	2.3369	1.70765	-2.85996	0.00423692	0.0302119	yes
NM_177736	Lrrc61	chr6:48504797-48522669	0.598077	2.30971	1.94931	-2.85969	0.00424062	0.0302356	yes
NM_008968	Ptgis	chr2:167028695-167066037	4.52556	11.618	1.3602	-2.85859	0.00425529	0.0303173	yes
NM_019571	Tspan5	chr3:138405171-138567397	5.69196	13.3808	1.23316	-2.85814	0.00426132	0.0303504	yes
NM_027521	Hmha1	chr10:79479416-79494216	2.79185	6.75336	1.27438	-2.85688	0.00427827	0.0304518	yes
NM_027860	0610010F05Rik	chr11:23473775-23533631	3.59387	7.8072	1.11927	-2.85685	0.00427867	0.0304533	yes
NM_031258	Chrdl1	chrX:139720216-139828805	0.00434799	0.260318	5.90378	-2.85342	0.00432514	0.0307224	yes
NM_008750	Nxn	chr11:76070727-76212643	13.6771	26.3589	0.946528	-2.85298	0.00433111	0.0307544	yes
NM_001081557	Camta1	chr4:150433631-151235877	0.516996	1.67666	1.69736	-2.85236	0.00433953	0.030801	yes
NM_133234	Bbc3	chr7:16894931-16903683	5.74108	13.3717	1.21979	-2.85104	0.00435765	0.0309051	yes
NM_146261	Fam199x	chrX:133584132-133617040	1.49138	3.34649	1.166	-2.85068	0.00436258	0.0309346	yes
NM_001267846	Fign	chr2:63809564-63936095	0.0797928	0.503626	2.65802	-2.84977	0.00437513	0.0310058	yes
NM_053014	Agpat3	chr10:77734307-77814445	7.01371	14.2269	1.02038	-2.84877	0.0043888	0.0310817	yes
NM_001143689	H2-Q4	chr17:35516561-35521619	1.26504	4.06536	1.68419	-2.84815	0.00439739	0.0311283	yes
NM_019683	Ankrd49	chr9:14584641-14587408	8.77425	19.0616	1.11932	-2.8471	0.00441193	0.0312143	yes
NM_146007	Col6a2	chr10:76058500-76086149	0.00265634	0.196154	6.2064	-2.84567	0.00443174	0.0313242	yes
NM_145973	Ell3	chr2:121264762-121268337	6.45933	15.1097	1.22602	-2.84215	0.00448107	0.0316034	yes
NM_172786	Il20ra	chr10:19432392-19479859	0.0306635	0.297417	3.27789	-2.84109	0.00449602	0.031687	yes
NM_080420	Lpo	chr11:87619929-87639616	0.00871456	0.219541	4.65492	-2.83823	0.0045365	0.031914	yes
NM_001039385	Vgf	chr5:137506164-137509221	0.04271	0.303515	2.82912	-2.83447	0.00459018	0.0322235	yes
NM_011465	Spta1	chr1:176102906-176178580	0.637811	1.71356	1.42579	-2.83351	0.00460404	0.0323016	yes
NM_028734	Steap2	chr5:5664828-5694568	0.174655	0.919327	2.39607	-2.83027	0.00465083	0.0325564	yes
NM_144521	Snap47	chr11:59220651-59263458	15.83	31.2082	0.979261	-2.83002	0.0046545	0.0325774	yes
NM_133764	Atp6v0e2	chr6:48487567-48491799	2.22343	6.46038	1.53883	-2.82814	0.00468191	0.032736	yes
NR_027923	C630043F03Rik	chr4:71862277-71864964	0.151108	0.66551	2.13888	-2.82753	0.00469086	0.0327867	yes
NM_145526	P2rx3	chr2:84836708-84875991	0.123446	0.51752	2.06773	-2.82377	0.00474622	0.0330964	yes
NM_016768	Pbx3	chr2:34026976-34227565	1.94383	5.82081	1.58232	-2.82326	0.00475382	0.0331422	yes
NM_011519	Sdc1	chr12:8778201-8800493	7.33756	14.8071	1.01292	-2.82213	0.00477065	0.0332442	yes
NM_175677	Trim12c	chr7:111487267-111501872	4.82883	10.5849	1.13226	-2.81826	0.00482847	0.0335782	yes
NM_008087	Gas2	chr7:59134514-59249828	0.630046	2.12791	1.7559	-2.81729	0.0048431	0.0336615	yes
NM_001033254	Pak6	chr2:118489312-118523756	0.067702	0.641615	3.24444	-2.81688	0.00484923	0.0336964	yes
NM_011171	Procr	chr2:155576952-155581214	0.124815	0.732111	2.55227	-2.81254	0.00491518	0.0340614	yes
NM_017469	Gucy1b3	chr3:81835925-81878633	0.0576112	0.33753	2.5506	-2.80886	0.00497175	0.0343763	yes
NM_008029	Flt4	chr11:49423180-49466241	0.462847	1.39751	1.59425	-2.80761	0.00499112	0.034488	yes
NM_001033267	Qrich2	chr11:116302638-116315661	0.115561	0.574954	2.3148	-2.80634	0.00501081	0.0345963	yes
NM_029879	Rgs7bp	chr13:105737232-105845010	0.0487112	0.226774	2.21893	-2.80615	0.00501379	0.0346142	yes
NM_010244	Fv1	chr4:147243087-147244467	0.466761	1.9265	2.04523	-2.80504	0.00503108	0.0347065	yes
NM_028299	2700029M09Rik	chr8:63369247-63386369	21.1742	42.4334	1.00289	-2.80456	0.00503849	0.0347501	yes
NM_001080808	Ccdc64	chr5:116099294-116181568	2.51629	6.96502	1.46883	-2.80338	0.00505695	0.0348575	yes
NM_007379	Abca2	chr2:25284193-25304059	1.4966	3.3246	1.15149	-2.80114	0.00509222	0.0350564	yes
NM_001018013	Izumo1	chr7:52877180-52882612	0.00711072	0.491266	6.11036	-2.8002	0.00510712	0.0351325	yes
NM_172867	Zfp462	chr4:54960816-55096435	5.70804	10.6173	0.895355	-2.79901	0.00512596	0.035238	yes
NM_026731	Ppp1r14a	chr7:30074338-30078409	1.85906	6.90584	1.89324	-2.79701	0.00515772	0.035431	yes
NM_011611	Cd40	chr2:164881135-164897154	0.351164	1.5294	2.12275	-2.79568	0.00517905	0.0355447	yes
NM_019660	Mycbp	chr4:123582255-123589493	6.79078	15.9055	1.22788	-2.79376	0.00520987	0.0357227	yes
NM_017405	Lsr	chr7:31742788-31758488	1.55295	7.61565	2.29396	-2.79341	0.00521563	0.0357543	yes
NM_026932	Ebna1bp2	chr4:118293403-118304520	31.7536	58.4679	0.880724	-2.79209	0.0052369	0.0358688	yes
NM_153528	Gramd1c	chr16:43980462-44028058	0.159489	0.618475	1.95526	-2.79147	0.00524692	0.0359252	yes
NM_010860	Myl6	chr10:127927916-127930881	134.311	247.734	0.883213	-2.79115	0.00525206	0.0359548	yes
NR_015485	1700108F19Rik	chr14:77077374-77086915	0.0380674	0.624115	4.03519	-2.78986	0.00527313	0.036078	yes
NM_001198835	Coch	chr12:52694327-52706760	0.123072	0.676526	2.45864	-2.78961	0.00527717	0.0360949	yes
NM_001034907	Zc3h12b	chrX:92907016-93123309	0.072412	0.367378	2.34297	-2.78906	0.00528618	0.0361488	yes
NM_001127169	Tceal7	chrX:132758579-132760639	0.162586	0.988154	2.60353	-2.78621	0.00533287	0.0364031	yes
NM_178746	Slc38a9	chr13:113450973-113528960	1.06857	2.48033	1.21485	-2.78581	0.00533941	0.036442	yes
NM_001114087	Pdlim7	chr13:55598847-55614807	1.62852	10.6418	2.70811	-2.78525	0.00534858	0.0364938	yes
NM_009609	Actg1	chr11:120207003-120209798	205.197	420.994	1.03679	-2.78386	0.00537169	0.0366245	yes
NM_001037812	Tmem237	chr1:59157436-59176940	4.37645	11.3412	1.37374	-2.78321	0.00538244	0.0366807	yes
NM_007905	Phc1	chr6:122267748-122290245	17.0655	37.7335	1.14477	-2.78207	0.00540134	0.036782	yes
NM_001100460	Zbtb42	chr12:113917050-113920958	0.118591	0.492565	2.05432	-2.78119	0.00541601	0.0368616	yes
NM_010320	Gng8	chr7:17477134-17480784	0.0374066	0.768674	4.36101	-2.78092	0.00542044	0.036885	yes
NM_025915	Tmem88	chr11:69209292-69211736	0.564607	13.109	4.53716	-2.77936	0.00544666	0.0370305	yes
NM_001144993	2810459M11Rik	chr1:87942437-87952031	0.107462	0.515292	2.26157	-2.77467	0.0055258	0.037465	yes
NM_007662	Cdh15	chr8:125372273-125391297	0.00299565	0.251272	6.39024	-2.77436	0.00553105	0.0374917	yes
NM_053090	Fam126a	chr5:23466753-23536501	1.47103	3.5093	1.25435	-2.77417	0.00553426	0.0375066	yes
NM_001033380	Itpripl2	chr7:125628625-125635489	0.217591	0.708643	1.70344	-2.77352	0.00554526	0.0375645	yes
NM_145473	Csdc2	chr15:81767188-81781371	0.0122058	0.248527	4.34776	-2.77292	0.00555559	0.0376208	yes
NM_026592	B230118H07Rik	chr2:101400937-101472685	1.85075	5.16027	1.47934	-2.77169	0.00557655	0.0377227	yes
NM_027652	Ept1	chr5:30559157-30598976	4.18926	8.13432	0.957327	-2.77137	0.0055821	0.0377517	yes
NM_016918	Nudt5	chr2:5766079-5789782	26.603	49.9816	0.909806	-2.77103	0.00558788	0.0377835	yes
NM_016685	Comp	chr8:72897446-72905965	0.0647428	0.370014	2.51479	-2.77022	0.00560177	0.0378599	yes
NM_001048208	Med14	chrX:12252496-12339099	1.44916	4.11764	1.5066	-2.77004	0.00560501	0.037877	yes
NM_013724	Nrk	chrX:135448968-135543629	0.186561	0.628011	1.75114	-2.76996	0.00560629	0.0378834	yes
NM_173392	Zfyve16	chr13:93257703-93300765	2.08048	4.64232	1.15793	-2.76911	0.00562099	0.0379614	yes
NM_009142	Cx3cl1	chr8:97296079-97306326	0.169143	0.667368	1.98024	-2.76801	0.00563994	0.0380634	yes
NM_011544	Tcf12	chr9:71692058-71959626	4.9687	11.1007	1.15972	-2.76559	0.00568198	0.0382775	yes
NM_027810	Bbs7	chr3:36472064-36512311	1.2462	3.63367	1.5439	-2.76508	0.00569093	0.0383255	yes
NM_010930	Nov	chr15:54577482-54585316	0.0790631	0.475892	2.58956	-2.76437	0.00570334	0.0383893	yes
NM_001013379	Zfp930	chr8:71732944-71754438	9.21968	17.8997	0.957149	-2.76363	0.00571628	0.038464	yes
NM_028046	1600014K23Rik	chrX:82495015-82515630	0.0653274	0.702786	3.42733	-2.76309	0.00572563	0.0385156	yes
NR_027888	Sqrdl	chr2:122591094-122635287	0.0164967	0.563318	5.0937	-2.75723	0.00582929	0.0390697	yes
NM_008158	Gpr27	chr6:99642672-99643812	0.174716	1.10907	2.66627	-2.75717	0.0058304	0.0390755	yes
NM_177915	Igsf1	chrX:47135713-47150922	0.198147	1.25295	2.66069	-2.75681	0.00583676	0.0391083	yes
NR_040660	LOC100504703	chr10:126507536-126508157	1.00296	5.64987	2.49395	-2.7555	0.00586028	0.0392327	yes
NM_011795	C1ql1	chr11:102800577-102807775	0.457777	1.77866	1.95807	-2.7541	0.00588537	0.0393695	yes
NM_181409	Mtmr11	chr3:95965892-95975641	0.74352	2.30693	1.63353	-2.75364	0.00589371	0.0394116	yes
NM_028055	Btbd17	chr11:114651982-114657206	0.0250189	0.235506	3.23467	-2.75217	0.00592021	0.0395559	yes
NM_145919	Abhd14a	chr9:106342381-106350009	8.70678	20.8421	1.25929	-2.75162	0.00593018	0.039611	yes
NM_001159900	Hopx	chr5:77516010-77544148	1.01556	3.50656	1.78778	-2.7507	0.00594683	0.0397068	yes
NM_024479	Wbscr27	chr5:135408242-135418507	4.94601	10.6121	1.10137	-2.74912	0.00597546	0.0398599	yes
NR_045709	1700007L15Rik	chr16:33379939-33380822	1.71451	5.82051	1.76335	-2.74852	0.00598647	0.0399179	yes
NM_001033874	Ak8	chr2:28555680-28668685	0.307798	1.2614	2.03498	-2.7468	0.0060179	0.0400896	yes
NM_025287	Spop	chr11:95275396-95354724	8.18226	16.1165	0.97797	-2.74548	0.00604222	0.040219	yes
NM_172728	Creb5	chr6:53523367-53645826	0.0306893	0.242499	2.98217	-2.74498	0.00605146	0.04027	yes
NM_001045484	Mef2b	chr8:72676676-72691387	0.659353	6.00737	3.18761	-2.7433	0.00608259	0.0404325	yes
NM_018747	Akap7	chr10:24888895-25018969	5.56981	11.4754	1.04284	-2.74221	0.00610271	0.0405478	yes
NM_001098222	Bhlhb9	chrX:132420389-132425620	6.62398	13.8667	1.06586	-2.73947	0.00615391	0.0408289	yes
NM_148940	Prss44	chr9:110716497-110720503	0.00564911	0.35435	5.97101	-2.7341	0.00625501	0.0413569	yes
NM_022032	Perp	chr10:18564876-18576878	2.35094	6.45207	1.45652	-2.73224	0.00629059	0.0415438	yes
NM_177591	Igsf1	chrX:47135713-47150922	0.0262022	0.971634	5.21265	-2.73208	0.0062936	0.0415613	yes
NM_133828	Creb1	chr1:64579377-64651122	3.98031	7.9577	0.999471	-2.73111	0.00631212	0.0416614	yes
NM_144936	Tmem45b	chr9:31233780-31271823	0.00669877	0.417557	5.96193	-2.72912	0.0063503	0.041867	yes
NM_178386	Slc25a31	chr3:40512792-40530016	0.521272	1.74615	1.74407	-2.72863	0.00635972	0.0419182	yes
NM_007461	Apba2	chr7:71646591-71898762	0.121611	1.36578	3.48938	-2.72792	0.00637348	0.0419909	yes
NM_198637	1700016K19Rik	chr11:75813413-75817071	0.0334865	0.525205	3.97123	-2.72765	0.00637869	0.0420172	yes
NM_172863	Zfp697	chr3:98186403-98235872	0.223442	0.738687	1.72506	-2.72701	0.00639108	0.0420801	yes
NM_028030	Rbpms2	chr9:65478388-65508325	49.2799	90.0396	0.869559	-2.72577	0.0064152	0.0422002	yes
NM_001038637	Gng2	chr14:20691780-20796471	7.6748	15.7585	1.03793	-2.7241	0.00644771	0.0423667	yes
NM_001159410	Guk1	chr11:58997356-59005454	18.9367	42.9963	1.18303	-2.72193	0.00649012	0.0425864	yes
NM_013580	Ldhc	chr7:54116632-54133512	1.7117	5.27587	1.62398	-2.71768	0.00657414	0.0430298	yes
NM_008360	Il18	chr9:50373472-50389942	0.106162	0.853801	3.00763	-2.71637	0.0066002	0.0431645	yes
NR_038186	0610007N19Rik	chr15:32170322-32174417	0.229891	1.13784	2.30728	-2.71623	0.00660303	0.0431785	yes
NM_009101	Rras	chr7:52273376-52277014	6.07164	16.0743	1.4046	-2.71512	0.00662527	0.0432852	yes
NM_001163103	Ppp1r36	chr12:77518585-77540478	0.0344015	0.356247	3.37233	-2.71473	0.00663305	0.0433237	yes
NM_177124	Tnrc6b	chr15:80541742-80771516	0.974354	3.33044	1.7732	-2.7144	0.00663966	0.0433564	yes
NM_177759	Ccdc60	chr5:116575589-116738994	0.0949484	0.457376	2.26817	-2.71389	0.00664979	0.0434096	yes
NM_022023	Gmfb	chr14:47427823-47441917	18.1597	33.1299	0.867398	-2.71358	0.00665608	0.043443	yes
NM_001177789	Phactr3	chr2:177853679-178073197	0.0621455	0.30048	2.27355	-2.71355	0.00665659	0.0434452	yes
NM_001198955	Gm7694	chr1:172228323-172236463	0.0381627	0.214074	2.48788	-2.71323	0.00666311	0.0434783	yes
NM_001159389	Rfx6	chr10:51397565-51450235	0.00287545	0.446407	7.27843	-2.7132	0.00666374	0.0434812	yes
NM_001103168	Zglp1	chr9:20866836-20871537	0.882819	3.08712	1.80607	-2.71265	0.00667484	0.0435407	yes
NM_007381	Acadl	chr1:66877412-66909883	4.72724	11.1011	1.23164	-2.71027	0.00672279	0.0437854	yes
NM_001081189	Uprt	chrX:101678120-101701601	0.968295	3.27339	1.75727	-2.70767	0.0067757	0.044058	yes
NM_146239	Cdk17	chr10:92623620-92704087	7.74084	14.8617	0.941035	-2.70668	0.00679597	0.044163	yes
NM_001109989	Nrep	chr18:33596672-33623683	0.844098	4.99768	2.56578	-2.70492	0.00683214	0.044355	yes
NM_175498	Pnma2	chr14:67530044-67538898	2.52359	5.57197	1.14271	-2.70428	0.00684533	0.0444251	yes
NM_001110300	Ap1m2	chr9:21099900-21116777	0.729694	8.09684	3.47199	-2.70373	0.00685661	0.0444804	yes
NM_020047	Tacstd2	chr6:67484052-67485816	0.0150155	0.327191	4.44561	-2.70293	0.00687312	0.0445614	yes
NM_144852	Slc7a4	chr16:17572110-17576764	0.195912	0.71282	1.86333	-2.70231	0.00688594	0.0446292	yes
NM_013873	Sult4a1	chr15:83906526-83936184	3.65781	8.50918	1.21804	-2.70011	0.00693167	0.0448578	yes
NM_178928	Afap1l1	chr18:61889915-61946316	0.309714	1.0338	1.73895	-2.69867	0.00696182	0.0450141	yes
NM_010926	Emc8	chr8:123177813-123192012	8.03596	14.8995	0.890721	-2.69809	0.00697391	0.0450746	yes
NM_009883	Cebpb	chr2:167514414-167515932	0.807777	2.75976	1.77251	-2.69797	0.00697631	0.0450862	yes
NM_025910	Mina	chr16:59471600-59555578	11.7769	23.8977	1.02091	-2.69753	0.00698553	0.0451316	yes
NM_029485	Spata24	chr18:35816342-35821840	2.31601	10.3619	2.16158	-2.6973	0.00699042	0.0451523	yes
NM_026164	Pnpla8	chr12:45370140-45414422	6.61508	12.5402	0.922732	-2.69719	0.00699275	0.0451649	yes
NR_038026	4933412E12Rik	chr10:116387617-116400335	0.0129551	0.630749	5.60548	-2.69547	0.00702895	0.045352	yes
NM_008081	B4galnt2	chr11:95724872-95776185	0.688094	1.9945	1.53535	-2.69364	0.00706763	0.0455576	yes
NM_146174	Fam115c	chr6:42573041-42595040	0.304554	1.02675	1.75331	-2.69115	0.00712065	0.0458406	yes
NM_021391	Ppp1r1a	chr15:103360709-103368423	3.68115	9.81559	1.41492	-2.68816	0.00718465	0.0461657	yes
NM_178877	Slc9b2	chr3:134970663-135005731	0.27915	1.04803	1.90857	-2.68773	0.00719387	0.0462118	yes
NM_183308	Pon2	chr6:5214623-5248373	1.29271	3.93607	1.60636	-2.68761	0.00719654	0.0462237	yes
NM_134012	Mbtd1	chr11:93747532-93808298	11.5291	20.8148	0.852327	-2.68653	0.00721995	0.0463512	yes
NM_145491	Rhoq	chr17:87362450-87424741	2.23531	6.29604	1.49397	-2.67887	0.00738711	0.0471963	yes
NM_001099631	Sh2d5	chr4:137806325-137816883	0.381361	1.23942	1.70044	-2.67731	0.00742158	0.0473726	yes
NM_001040690	Rap1gds1	chr3:138588860-138738165	3.7126	8.98184	1.27458	-2.67687	0.00743127	0.0474269	yes
NM_177324	Sbf2	chr7:117451526-117758434	8.91359	16.013	0.84517	-2.67622	0.00744579	0.0474995	yes
NM_007672	Cdr2	chr7:128100549-128125826	3.78807	8.59551	1.18212	-2.67606	0.00744928	0.0475177	yes
NM_010254	Galr2	chr11:116142252-116145252	0.415362	1.59142	1.93787	-2.67574	0.00745648	0.0475538	yes
NM_194462	Akap9	chr5:3928185-4080204	6.72922	12.2196	0.86069	-2.67441	0.00748607	0.0477066	yes
NM_026759	Mrpl13	chr15:55365649-55388867	53.1839	98.8284	0.893935	-2.67346	0.00750723	0.0478109	yes
NM_174848	Crybg3	chr16:59471600-59555578	0.654106	3.05622	2.22415	-2.67245	0.00753006	0.0479331	yes
NR_015486	D130017N08Rik	chr5:144519222-144525811	0.0495802	0.362288	2.8693	-2.67223	0.00753486	0.0479567	yes
NM_001146215	Msh5	chr17:35165549-35183668	0.12582	0.990327	2.97655	-2.67175	0.00754573	0.0480101	yes
NM_178398	Wipi2	chr5:143105537-143145324	19.111	34.2706	0.842567	-2.66997	0.00758588	0.0482146	yes
NM_029361	Wnk2	chr13:49131670-49243697	0.0951137	0.437039	2.20004	-2.66913	0.00760469	0.0483075	yes
NM_028037	Acad10	chr5:122071037-122110519	1.41583	3.629	1.35793	-2.66686	0.00765642	0.0485727	yes
NM_207176	Tes	chr6:17015148-17055825	5.27336	11.2377	1.09155	-2.66579	0.00768072	0.0486983	yes
NM_001122739	Inppl1	chr7:108966826-108986740	12.9468	23.8118	0.879076	-2.66537	0.00769026	0.0487432	yes
NM_001135577	Smim13	chr13:41345212-41371946	1.93594	4.46887	1.20687	-2.66378	0.00772686	0.0489301	yes
NM_028036	Tmco6	chr18:36894723-36904241	4.73327	17.3196	1.8715	-2.66277	0.00775001	0.0490471	yes
NM_001163527	Itpripl1	chr2:126964504-126969193	1.50371	3.79294	1.33479	-2.6627	0.00775161	0.049054	yes
NR_027448	AA543186	chr2:25182969-25188091	0.0508153	0.359196	2.82144	-2.66227	0.00776155	0.049106	yes
NM_019724	Mmp16	chr4:17780628-18045881	0.125219	0.463263	1.88738	-2.65983	0.00781799	0.0493864	yes
NM_175149	2310022B05Rik	chr8:127159655-127187269	3.09631	6.89402	1.15479	-2.65882	0.00784137	0.0494967	yes
NM_011035	Pak1	chr7:104991448-105060891	7.80251	15.0075	0.94367	-2.65808	0.00785877	0.0495806	yes
NM_153410	Gpsm1	chr2:26171052-26207630	0.364371	3.85555	3.40346	-2.65606	0.00790598	0.0498146	yes

## Sheet: Upreg. Genes - Time Course Data
Supplemental Table 3B. Genes upregulated during ESC to EpiLC differentiation and their temporal gene expression
RefSeq Accession	Gene Symbol	Chromatin State in Naïve ESCs (0h)	Gene Expression (FPKM)								Fold Change vs. 0h (Log2)							Absolute Difference in Gene Expression vs 0h
			0h	1h	6h	12h	24h	36h	48h	72h	1h	6h	12h	24h	36h	48h	72h	1h	6h	12h	24h	36h	48h	72h
NM_145584	Spon1	Bivalent	0.00133945	0.00332372	0	0.00310789	0.0843983	0.253562	0.47527	1.98331	1.31116	-10	1.21429	5.9775	7.56455	8.47096	10.5321	0.00198427	-0.00133945	0.00176844	0.0830588	0.252223	0.473931	1.98197
NM_011580	Thbs1	Bivalent	0.0121702	0.254846	1.37931	1.48317	3.93029	2.22435	1.40396	12.4598	4.3882	6.82445	6.92919	8.33514	7.51389	6.85001	9.99971	0.242676	1.36714	1.471	3.91812	2.21218	1.39179	12.4476
NM_001007580	Fndc3c1	Bivalent	0.0147586	0.0610218	0.0696213	0.0967044	0.262167	0.96373	2.65069	8.11633	2.04777	2.23797	2.71203	4.15086	6.029	7.48867	9.10313	0.0462632	0.0548627	0.0819458	0.247408	0.948971	2.63593	8.10157
NM_023622	Rgl3	Bivalent	0.00732869	0.00836894	0.0182471	0.0155916	0.0314382	0.119757	0.374156	2.78608	0.19149	1.31604	1.08914	2.10089	4.03041	5.67394	8.57047	0.00104025	0.0109184	0.00826291	0.0241095	0.112428	0.366827	2.77875
NM_025831	Pxdc1	Bivalent	0.018761	0.136785	0.422888	0.206319	1.12271	3.9212	5.47742	6.83527	2.8661	4.49447	3.45907	5.9031	7.70741	8.18962	8.50912	0.118024	0.404127	0.187558	1.10395	3.90244	5.45866	6.81651
NM_001164804	Coro2a	Bivalent	0.00724433	0.0556475	0.0117639	0.0306415	0.0328703	0.0628889	0.469528	2.47907	2.94139	0.699442	2.08056	2.18186	3.11788	6.01822	8.41873	0.0484032	0.00451957	0.0233972	0.025626	0.0556446	0.462284	2.47183
NM_027990	Lypd6b	Bivalent	0.00892208	0.00470823	0.102967	0.0440998	0.334505	1.87405	2.78644	2.81776	-0.922195	3.52866	2.30532	5.2285	7.71456	8.28683	8.30295	-0.00421385	0.0940449	0.0351777	0.325583	1.86513	2.77752	2.80884
NM_001081403	Klhl14	Bivalent	0.0195052	0.021042	0.0339631	0.0444045	0.0633662	0.220227	0.55012	5.77757	0.109413	0.800109	1.18685	1.69985	3.49706	4.81782	8.21046	0.0015368	0.0144579	0.0248993	0.043861	0.200722	0.530615	5.75806
NM_175751	Zfp608	Bivalent	0.0279971	0.0134887	0.0176255	0.0568748	0.935908	3.47556	5.76601	8.1398	-1.05353	-0.667613	1.02251	5.06302	6.95582	7.68615	8.18357	-0.0145084	-0.0103716	0.0288777	0.907911	3.44756	5.73801	8.1118
NM_194055	Esrp1	Bivalent	0.111914	0.000280335	0.516752	4.95289	16.5707	26.3899	22.5389	27.5862	-8.64102	2.20708	5.46781	7.2101	7.88145	7.65388	7.94541	-0.111634	0.404838	4.84098	16.4588	26.278	22.427	27.4743
NM_011782	Adamts5	Bivalent	0.00119349	0.00786866	0.00886951	0.00470078	0.00472902	0.00406048	0.0525711	0.227429	2.72093	2.89367	1.97771	1.98635	1.76646	5.46101	7.57409	0.00667517	0.00767602	0.00350729	0.00353553	0.00286699	0.0513776	0.226236
NM_178920	Mal2	Bivalent	0.0483085	0.0152934	0.0299594	0.0106903	0.0607816	0.381378	3.3304	8.45808	-1.65937	-0.689268	-2.17597	0.331358	2.98087	6.10727	7.45191	-0.0330151	-0.0183491	-0.0376182	0.0124731	0.33307	3.28209	8.40977
NM_011141	Pou3f1	Bivalent	0.107278	0.150587	0.440409	1.92677	17.4587	33.154	32.4376	17.689	0.489243	2.03749	4.16676	7.34645	8.27168	8.24017	7.36535	0.043309	0.333131	1.81949	17.3514	33.0467	32.3303	17.5817
NM_030725	Syt13	Bivalent	0.0303115	0.0452159	0.0292201	0.0428275	1.10273	2.76292	5.44247	4.79967	0.576965	-0.0529041	0.498672	5.18507	6.51018	7.48825	7.30693	0.0149044	-0.0010914	0.012516	1.07242	2.73261	5.41216	4.76936
NM_176942	Gabra5	Bivalent	0.00959	0.0205361	0.0454702	0.0148248	0.055519	0.204468	0.964572	1.44892	1.09856	2.24532	0.62841	2.53338	4.4142	6.65221	7.23923	0.0109461	0.0358802	0.0052348	0.045929	0.194878	0.954982	1.43933
NM_172621	Clic5	Bivalent	0.00447807	0.00706856	0.00612425	0.0016344	0.0474899	0.13529	0.15326	0.643061	0.658539	0.451656	-1.45412	3.40667	4.91703	5.09696	7.16593	0.00259049	0.00164618	-0.00284367	0.0430118	0.130812	0.148782	0.638583
NM_175631	Cbln4	Bivalent	0.00609102	0.0039439	0.00336073	0.00375123	0.0425983	0.385278	0.431293	0.775015	-0.627061	-0.857909	-0.69932	2.80604	5.98307	6.14584	6.9914	-0.00214712	-0.00273029	-0.00233979	0.0365073	0.379187	0.425202	0.768924
NM_010664	Krt18	Bivalent	0.994407	1.66975	7.43944	2.24664	5.78097	21.8239	30.439	122.703	0.747724	2.90329	1.17586	2.5394	4.45593	4.93594	6.94712	0.675343	6.44503	1.25223	4.78656	20.8295	29.4446	121.709
NM_173016	Vat1l	Bivalent	0.021941	0.0201301	0.0628735	0.0966667	0.2786	0.534585	1.2545	2.6957	-0.124275	1.51882	2.13939	3.66649	4.60672	5.83734	6.94089	-0.0018109	0.0409325	0.0747257	0.256659	0.512644	1.23256	2.67376
NM_172710	Sel1l3	Bivalent	0.0176234	0.01875	0.0202671	0.0156594	0.101148	0.106183	0.413611	2.15377	0.0893983	0.201647	-0.170463	2.5209	2.59099	4.55271	6.93323	0.0011266	0.0026437	-0.001964	0.0835246	0.0885596	0.395988	2.13615
NM_177305	Arl4c	Bivalent	0.327465	0.23792	0.561891	1.48718	7.74712	16.7489	25.4583	37.2745	-0.460864	0.77895	2.18317	4.56425	5.67658	6.28065	6.8307	-0.089545	0.234426	1.15971	7.41965	16.4214	25.1308	36.947
NM_018827	Crlf1	Bivalent	0.0569462	0.21334	0.292767	0.221276	0.476483	2.12568	4.5292	6.44415	1.90548	2.36208	1.95818	3.06475	5.22218	6.31351	6.82225	0.156394	0.235821	0.16433	0.419537	2.06873	4.47225	6.3872
NM_015736	Galnt3	Bivalent	0.0890856	0.188456	0.303583	0.225655	0.876267	4.02418	7.16391	9.79749	1.08096	1.76883	1.34085	3.29811	5.49736	6.32941	6.78108	0.0993704	0.214497	0.136569	0.787181	3.93509	7.07482	9.7084
NM_021509	Moxd1	Bivalent	0.0286966	0.0871863	0.0236795	0.0233111	0.0481488	0.0558654	0.705087	2.92233	1.60322	-0.277241	-0.299863	0.74662	0.961075	4.61885	6.6701	0.0584897	-0.0050171	-0.0053855	0.0194522	0.0271688	0.67639	2.89363
NM_175096	Stbd1	Bivalent	0.0375853	0.0447387	0.0333637	0.0261495	0.127905	0.434664	1.2243	3.55911	0.251355	-0.171889	-0.523385	1.76683	3.53166	5.02564	6.5652	0.0071534	-0.0042216	-0.0114358	0.0903197	0.397079	1.18671	3.52152
NM_198029	Fermt1	Bivalent	0.0481536	0.0559666	0.0346235	0.058332	0.253988	1.09507	2.35973	4.32111	0.216922	-0.475892	0.276644	2.39904	4.50724	5.61483	6.48761	0.007813	-0.0135301	0.0101784	0.205834	1.04692	2.31158	4.27296
NM_207583	Fam5b	Bivalent	0.0265265	0.0720407	0.0554339	0.126838	0.500182	0.653728	0.683811	2.14838	1.44138	1.06333	2.25748	4.23695	4.62318	4.68809	6.33967	0.0455142	0.0289074	0.100311	0.473656	0.627201	0.657284	2.12185
NM_181395	Pxdn	Bivalent	0.196275	0.303735	0.772805	1.34149	3.48685	5.45135	8.86754	14.7299	0.629937	1.97723	2.77289	4.15098	4.79567	5.49759	6.22973	0.10746	0.57653	1.14522	3.29058	5.25507	8.67127	14.5336
NM_183023	Rims4	Bivalent	0.042302	0.092533	0.0653396	0.0412695	1.2185	5.52046	7.89171	3.16388	1.12924	0.627232	-0.0356499	4.84824	7.02792	7.54347	6.22483	0.050231	0.0230376	-0.0010325	1.1762	5.47816	7.84941	3.12158
NM_001017427	Rasef	Bivalent	0.0236788	0.0526222	0.0490956	0.0283161	0.184279	0.519372	1.64984	1.6923	1.15208	1.052	0.258027	2.96022	4.4551	6.12259	6.15925	0.0289434	0.0254168	0.0046373	0.1606	0.495693	1.62616	1.66862
NM_001164251	Tpm1	Bivalent	1.14247	2.33682	4.79836	1.76103	4.13806	3.67872	10.1634	78.4502	1.03239	2.07039	0.624263	1.8568	1.68705	3.15315	6.10155	1.19435	3.65589	0.61856	2.99559	2.53625	9.02093	77.3077
NM_144783	Wt1	Bivalent	0.017925	0.101261	0.343049	0.443179	3.93931	13.1109	4.44808	1.14046	2.49803	4.25837	4.62784	7.77983	9.51458	7.95507	5.9915	0.083336	0.325124	0.425254	3.92138	13.093	4.43016	1.12254
NM_011261	Reln	Bivalent	0.0130998	0.0220371	0.0915393	0.116024	0.119601	0.184976	0.316055	0.787624	0.75039	2.80485	3.14681	3.19061	3.81972	4.59256	5.90989	0.0089373	0.0784395	0.102924	0.106501	0.171876	0.302955	0.774524
NM_029357	Pcdh1	Bivalent	0.11921	0.128744	0.930141	1.55577	5.26763	19.3054	15.7844	6.67202	0.111	2.96394	3.70605	5.46558	7.33936	7.04885	5.80655	0.009534	0.810931	1.43656	5.14842	19.1862	15.6652	6.55281
NM_021050	Cftr	Bivalent	0.00392817	0.0213311	0.0411147	0.0278031	0.0610588	0.0765261	0.094477	0.218429	2.44103	3.38773	2.82332	3.95827	4.28402	4.58803	5.79716	0.0174029	0.0371865	0.0238749	0.0571306	0.0725979	0.0905488	0.214501
NM_009107	Rxrg	Bivalent	0.0144211	0.0451057	0.15772	0.274259	0.911853	2.97154	2.58606	0.793143	1.64513	3.45111	4.24929	5.98255	7.68689	7.48643	5.78133	0.0306846	0.143299	0.259838	0.897432	2.95712	2.57164	0.778722
NM_001081047	Cnksr1	Bivalent	0.0449264	0.098006	0.0640857	0.111299	0.166982	0.291178	1.10869	2.41251	1.12531	0.512439	1.30881	1.89406	2.69627	4.62515	5.74683	0.0530796	0.0191593	0.0663726	0.122056	0.246252	1.06376	2.36758
NM_001081185	Flnc	Bivalent	0.105672	0.101713	3.04253	1.19305	1.1414	14.2333	13.2787	5.30841	-0.0550891	4.84761	3.49699	3.43314	7.07353	6.97338	5.65061	-0.003959	2.93686	1.08738	1.03573	14.1276	13.173	5.20274
NM_029529	Slc35d3	Bivalent	0.0650193	0.148113	0.924425	2.15923	5.47296	5.47219	3.83003	3.20434	1.18776	3.82962	5.05351	6.39531	6.39511	5.88034	5.62302	0.0830937	0.859406	2.09421	5.40794	5.40717	3.76501	3.13932
NM_026240	Gramd3	Bivalent	0.117911	0.167758	0.506736	0.429889	3.68868	4.71747	4.77878	5.59649	0.508683	2.10354	1.86627	4.96733	5.32224	5.34087	5.56875	0.049847	0.388825	0.311978	3.57077	4.59956	4.66087	5.47858
NM_009451	Tubb4a	Bivalent	0.0430421	0.0150925	0.0212077	0.0225135	0.0090834	0.258958	1.20299	2.00907	-1.51192	-1.02116	-0.934958	-2.24444	2.5889	4.80473	5.54464	-0.0279496	-0.0218344	-0.0205286	-0.0339587	0.215916	1.15995	1.96603
NM_013779	Magel2	Bivalent	0.0254601	0.065846	0.054606	0.0833459	0.15571	0.343318	0.449013	1.16232	1.37086	1.10082	1.71087	2.61255	3.75324	4.14045	5.51263	0.0403859	0.0291459	0.0578858	0.13025	0.317858	0.423553	1.13686
NM_134117	Pkdcc	Bivalent	0.0785938	0.214563	0.298885	0.329196	1.18776	1.99423	5.16345	3.58282	1.44891	1.9271	2.06646	3.91768	4.66527	6.03778	5.51054	0.135969	0.220291	0.250602	1.10917	1.91564	5.08486	3.50423
NM_013568	Kcna6	Bivalent	0.0045025	0.00710718	0.00156233	0.00164331	0.00824553	0.0349671	0.0921207	0.199841	0.658551	-1.52703	-1.45412	0.872886	2.9572	4.35473	5.47198	0.00260468	-0.00294017	-0.00285919	0.00374303	0.0304646	0.0876182	0.195338
NM_018777	Cldn6	Bivalent	1.66115	0.964925	2.11568	3.27625	8.8552	26.4329	58.3806	73.6204	-0.783694	0.348939	0.979863	2.41434	3.99208	5.13523	5.46985	-0.696225	0.45453	1.6151	7.19405	24.7718	56.7195	71.9592
NM_016887	Cldn7	Bivalent	1.0149	0.634647	0.186145	0.206062	0.931033	3.95058	21.2344	44.3334	-0.677311	-2.44684	-2.30019	-0.124433	1.96073	4.38699	5.44898	-0.380253	-0.828755	-0.808838	-0.083867	2.93568	20.2195	43.3185
NM_009741	Bcl2	Bivalent	0.0205465	0.0337745	0.0222769	0.00659498	0.00349403	0.0136603	0.144654	0.89668	0.717042	0.116656	-1.63945	-2.55593	-0.588903	2.81564	5.44763	0.013228	0.0017304	-0.0139515	-0.0170525	-0.0068862	0.124108	0.876134
NM_010251	Gabra4	Bivalent	0.00478454	0.0255246	0.021806	0.0289637	0.19556	0.585019	1.01736	0.202696	2.41544	2.18827	2.59779	5.35309	6.93396	7.73223	5.40479	0.0207401	0.0170215	0.0241792	0.190775	0.580234	1.01258	0.197911
NM_001039485	Piezo2	Bivalent	0.0226038	0.0163891	0.032207	0.0315733	0.0275967	0.0314835	0.215465	0.950447	-0.463829	0.510809	0.48214	0.28793	0.478031	3.25282	5.39397	-0.0062147	0.0096032	0.0089695	0.0049929	0.0088797	0.192861	0.927843
NM_001039387	Nsmf	Bivalent	0.0986269	0.0810222	0.000295771	0	0.169402	0.653982	2.34441	4.11047	-0.283664	-8.38136	-10	0.780398	2.7292	4.5711	5.38118	-0.0176047	-0.0983311	-0.0986269	0.0707751	0.555355	2.24578	4.01184
NM_080726	Rem2	Bivalent	0.0481746	0.0887623	0.0606588	0.066726	0.173134	0.882744	3.06935	1.94578	0.881674	0.332444	0.469976	1.84554	4.19565	5.99352	5.33593	0.0405877	0.0124842	0.0185514	0.124959	0.834569	3.02118	1.89761
NM_015819	Hs6st2	Bivalent	0.0246204	0.03418	0.0275824	0.0636716	0.268507	0.410377	1.00721	0.981934	0.473298	0.163894	1.3708	3.44703	4.05902	5.35437	5.3177	0.0095596	0.002962	0.0390512	0.243887	0.385757	0.98259	0.957314
NM_170671	Mycbpap	Bivalent	0.00975361	0.0148924	0.00320421	0	0	0.0146103	0.11	0.387511	0.610568	-1.60597	-10	-10	0.582978	3.49542	5.31216	0.00513879	-0.0065494	-0.00975361	-0.00975361	0.00485669	0.100246	0.377757
NM_177320	Pik3r5	Bivalent	0.007996	0.0264417	0.00826024	0.0364604	0.0266851	0.021547	0.176792	0.315161	1.72546	0.0469052	2.18898	1.73868	1.43014	4.46663	5.30067	0.0184457	0.00026424	0.0284644	0.0186891	0.013551	0.168796	0.307165
NM_029614	Prss23	Bivalent	0.010958	0.070215	0.181564	0.0307814	0.0852191	0.135559	0.268001	0.425411	2.67979	4.05042	1.49007	2.95919	3.62886	4.61218	5.2788	0.059257	0.170606	0.0198234	0.0742611	0.124601	0.257043	0.414453
NM_177900	Hapln4	Bivalent	0.0637256	0.0783821	0.031087	0.0139845	0.0957805	0.799826	2.47725	2.4123	0.298651	-1.03556	-2.18804	0.587859	3.64974	5.28072	5.24239	0.0146565	-0.0326386	-0.0497411	0.0320549	0.7361	2.41352	2.34857
NM_010228	Flt1	Bivalent	0.0103749	0.0100699	0.149412	0.0144636	0.0366145	0.347765	0.310219	0.378173	-0.0430481	3.84813	0.479329	1.81932	5.06694	4.90212	5.18788	-0.000305	0.139037	0.0040887	0.0262396	0.33739	0.299844	0.367798
NM_009234	Sox11	Bivalent	0.179219	0.166163	0.818485	1.25403	3.64903	4.73909	6.26499	6.35956	-0.109124	2.19123	2.80678	4.34772	4.72481	5.12752	5.14913	-0.013056	0.639266	1.07481	3.46981	4.55987	6.08577	6.18034
NM_001113384	Gnao1	Bivalent	0.0141942	0.0350909	0.022823	0.0478517	0.0313588	0.0320529	0.13864	0.495218	1.3058	0.685187	1.75327	1.14357	1.17515	3.28797	5.12469	0.0208967	0.0086288	0.0336575	0.0171646	0.0178587	0.124446	0.481024
NM_199465	Nexn	Bivalent	0.0476597	0.0424439	0.0295119	0.0443272	0.0353446	0.0355657	0.459437	1.62622	-0.167213	-0.691473	-0.104578	-0.43128	-0.422283	3.26903	5.09261	-0.0052158	-0.0181478	-0.0033325	-0.0123151	-0.012094	0.411777	1.57856
NM_009660	Alox15	Bivalent	0.0275171	0.0268054	1.0194	1.76945	1.67927	2.25812	1.449	0.919764	-0.0378048	5.21125	6.00683	5.93136	6.35865	5.71859	5.06286	-0.0007117	0.991883	1.74193	1.65175	2.2306	1.42148	0.892247
NM_172383	Tmem125	Bivalent	0.113618	0.0782998	0.337237	0.254767	0.71898	1.64378	2.44909	3.76958	-0.537111	1.56957	1.16499	2.66176	3.85475	4.42998	5.05214	-0.0353182	0.223619	0.141149	0.605362	1.53016	2.33547	3.65596
NM_172604	Scara3	Bivalent	0.00743265	0.012833	0	0.00287316	0	0.00347192	0.0468648	0.240795	0.78791	-10	-1.37124	-10	-1.09814	2.65656	5.01778	0.00540035	-0.00743265	-0.00455949	-0.00743265	-0.00396073	0.0394321	0.233362
NM_133485	Ppp1r14c	Bivalent	0.03548	0.0514526	0.174564	0.481797	2.30931	1.31576	0.576261	1.13393	0.536238	2.29868	3.76335	6.02431	5.21275	4.02164	4.99818	0.0159726	0.139084	0.446317	2.27383	1.28028	0.540781	1.09845
NM_026346	Fbxo32	Bivalent	0.0174703	0.0842845	0.256561	0.410255	1.03651	0.881861	0.368755	0.550393	2.27036	3.87633	4.55354	5.89069	5.65757	4.39969	4.97749	0.0668142	0.239091	0.392785	1.01904	0.864391	0.351285	0.532923
NM_009621	Adamts1	Bivalent	0.0267508	0.118498	0.0664495	0.101496	0.218134	0.215742	0.31629	0.838681	2.14721	1.31268	1.92377	3.02756	3.01165	3.56359	4.97047	0.0917472	0.0396987	0.0747452	0.191383	0.188991	0.289539	0.81193
NM_015795	Fbxo16	Bivalent	0.129559	0.220228	0.147227	0.253575	0.420116	0.329897	2.04847	4.03422	0.765389	0.184433	0.968803	1.69718	1.34841	3.98287	4.96061	0.090669	0.017668	0.124016	0.290557	0.200338	1.91891	3.90466
NM_028966	Samd4	Bivalent	0.0173341	0.022877	0.303842	0.223826	0.0857244	0.0737223	0.269007	0.5037	0.400285	4.13164	3.69069	2.30609	2.08849	3.95596	4.86088	0.0055429	0.286508	0.206492	0.0683903	0.0563882	0.251673	0.486366
NM_001042528	Cacna1b	Bivalent	0.0301678	0.0169783	5.0645e-06	0.0763106	0.332019	0.568806	0.469502	0.817661	-0.829317	-12.5403	1.33887	3.46018	4.23686	3.96005	4.76042	-0.0131895	-0.0301627	0.0461428	0.301851	0.538638	0.439334	0.787493
NM_028584	Marveld3	Bivalent	0.179002	0.106042	0.128081	0.0205844	0.0449026	0.226279	1.68824	4.8497	-0.75534	-0.482919	-3.12035	-1.9951	0.338127	3.23747	4.75985	-0.07296	-0.050921	-0.158418	-0.134099	0.047277	1.50924	4.6707
NM_019958	Rgs17	Bivalent	0.0180711	0.0126844	1.67047e-07	0.0146388	0.00850309	0.0367089	0.0882669	0.487142	-0.510629	-16.7231	-0.303887	-1.08763	1.02245	2.28819	4.75259	-0.0053867	-0.0180709	-0.0034323	-0.00956801	0.0186378	0.0701958	0.469071
NM_007765	Crmp1	Bivalent	0.782364	0.416761	0.505768	4.67552	18.4802	12.7995	18.5166	20.9385	-0.90862	-0.629364	2.57921	4.562	4.0321	4.56484	4.74217	-0.365603	-0.276596	3.89316	17.6978	12.0171	17.7342	20.1561
NM_025961	Gatm	Bivalent	0.107291	0.208735	0.12021	0.126674	0.204795	0.535595	2.43338	2.84905	0.960143	0.164028	0.239591	0.932651	2.31961	4.50336	4.73088	0.101444	0.012919	0.019383	0.097504	0.428304	2.32609	2.74176
NM_007863	Mpp3	Bivalent	0.0592109	0.0720676	0.0981037	0.175774	0.265007	0.643232	1.33226	1.55714	0.283488	0.728445	1.56979	2.1621	3.4414	4.49187	4.71689	0.0128567	0.0388928	0.116563	0.205796	0.584021	1.27305	1.49793
NR_027352	Vash2	Bivalent	0.073183	0.0915339	0.124403	0.134133	0.468203	0.684814	2.27487	1.86459	0.322798	0.765441	0.874084	2.67755	3.22613	4.95813	4.67121	0.0183509	0.05122	0.06095	0.39502	0.611631	2.20169	1.79141
NM_001252453	Ptprs	Bivalent	0.739555	0.555528	1.52845	2.16788	2.61721	7.23684	18.3229	18.7833	-0.412798	1.04734	1.55156	1.8233	3.29063	4.63085	4.66665	-0.184027	0.788895	1.42832	1.87766	6.49728	17.5833	18.0437
NM_183027	Ap1s3	Bivalent	0.0430238	0.0483041	0.270392	0.252804	0.342507	0.487455	0.609802	1.086	0.167011	2.65185	2.55481	2.99293	3.50206	3.82513	4.65775	0.0052803	0.227368	0.20978	0.299483	0.444431	0.566778	1.04298
NM_029999	Lbh	Bivalent	0.186256	0.165532	0.159515	0.164043	0.154636	0.669972	1.66913	4.67137	-0.170177	-0.223595	-0.183213	-0.268411	1.84681	3.16374	4.64849	-0.020724	-0.026741	-0.022213	-0.03162	0.483716	1.48287	4.48511
NM_001134741	Tdrd5	Bivalent	0.16548	0.125785	0.520139	0.114656	0.159641	0.802379	2.31141	4.11571	-0.395697	1.65224	-0.529345	-0.0518256	2.27763	3.80404	4.63641	-0.039695	0.354659	-0.050824	-0.005839	0.636899	2.14593	3.95023
NM_019662	Rrad	Bivalent	0.0257679	0.516587	0.172539	0.0752639	0.269285	0.80353	0.275993	0.64082	4.32536	2.74328	1.54638	3.38549	4.96271	3.42098	4.63627	0.490819	0.146771	0.049496	0.243517	0.777762	0.250225	0.615052
NM_001135149	Slc39a8	Bivalent	0.038496	2.39449e-06	0	0.0448175	0.142569	0.110792	0	0.938776	-13.9727	-10	0.219354	1.88888	1.52507	-10	4.608	-0.0384936	-0.038496	0.0063215	0.104073	0.072296	-0.038496	0.90028
NM_007418	Adra2c	Bivalent	0.0132306	0.0171329	0.0143515	0.00651689	0.0246391	0.0170184	0.197896	0.322269	0.372891	0.117323	-1.02162	0.897071	0.363217	3.90279	4.60632	0.0039023	0.0011209	-0.00671371	0.0114085	0.0037878	0.184665	0.309038
NM_001277876	Tpm2	Bivalent	0.735684	1.01747	0.792492	1.22339	3.41997	5.91961	11.5497	17.7075	0.467828	0.10731	0.733726	2.21683	3.00834	3.97263	4.58913	0.281786	0.056808	0.487706	2.68429	5.18393	10.814	16.9718
NM_008718	Npas1	Bivalent	0.0132282	0.0103663	0.0502634	0	0	0.0376588	0.113498	0.30213	-0.351716	1.92589	-10	-10	1.50937	3.10098	4.51348	-0.0028619	0.0370352	-0.0132282	-0.0132282	0.0244306	0.10027	0.288902
NM_013871	Mapk12	Bivalent	1.02647	0.607788	1.08065	0.662793	2.6726	4.87296	13.1978	23.0639	-0.756051	0.0742079	-0.631061	1.38055	2.24711	3.68453	4.48987	-0.418682	0.05418	-0.363677	1.64613	3.84649	12.1713	22.0374
NM_001101464	Foxi3	Bivalent	0.176267	0.0291307	0.725965	1.18484	5.48249	8.29707	7.20543	3.94007	-2.59715	2.04214	2.74886	4.959	5.55677	5.35325	4.48239	-0.147136	0.549698	1.00857	5.30622	8.1208	7.02916	3.7638
NM_029947	Prdm8	Bivalent	0.0135833	0	0.0088242	0.00964582	0.0315488	0.0311392	0.161164	0.302311	-10	-0.622297	-0.493858	1.21575	1.1969	3.56862	4.47613	-0.0135833	-0.0047591	-0.00393748	0.0179655	0.0175559	0.147581	0.288728
NM_008626	Mrc2	Bivalent	0.0999257	0.124945	0.0996479	0.164987	0.617903	2.11884	3.11686	2.18142	0.322365	-0.00401637	0.723425	2.62845	4.40628	4.96309	4.44827	0.0250193	-0.0002778	0.0650613	0.517977	2.01891	3.01693	2.08149
NM_020047	Tacstd2	Bivalent	0.0150155	0.185856	1.66419	0.0115987	0.0351336	0.0663964	0.261586	0.327191	3.62966	6.79222	-0.372489	1.2264	2.14465	4.12276	4.44561	0.170841	1.64917	-0.0034168	0.0201181	0.0513809	0.24657	0.312175
NM_144808	Slc39a14	Bivalent	0.241865	1.57186	7.9987	8.09351	6.63248	5.76374	7.64304	5.18418	2.7002	5.04749	5.06449	4.77727	4.57473	4.98187	4.42184	1.33	7.75684	7.85165	6.39062	5.52188	7.40118	4.94231
NM_144797	Metrnl	Bivalent	0.0426774	0.0308601	0.082954	0.131684	1.35191	0.96083	1.30197	0.908488	-0.46773	0.958839	1.62554	4.98538	4.49274	4.93108	4.41192	-0.0118173	0.0402766	0.0890066	1.30923	0.918153	1.25929	0.865811
NM_170684	Cpne7	Bivalent	0.0546109	0.0368997	0.0156924	0.021266	0.0916441	0.220084	0.905692	1.16219	-0.56558	-1.79912	-1.36064	0.746853	2.01079	4.05176	4.41151	-0.0177112	-0.0389185	-0.0333449	0.0370332	0.165473	0.851081	1.10758
NM_023158	Cxcl16	Bivalent	0.122204	0.327026	0.0609546	0.0552263	0.0974886	0.160226	1.07812	2.59252	1.42011	-1.00348	-1.14586	-0.325986	0.390817	3.14115	4.40699	0.204822	-0.0612494	-0.0669777	-0.0247154	0.038022	0.955916	2.47032
NM_010921	Nkx3-1	Bivalent	0.0389772	0.0520319	0.088545	0.0909718	0.204543	0.264295	0.509257	0.826832	0.416766	1.18378	1.22279	2.3917	2.76145	3.70769	4.40689	0.0130547	0.0495678	0.0519946	0.165566	0.225318	0.47028	0.787855
NM_010242	Fut4	Bivalent	0.0172954	0.02329	0.0397838	0.0196113	0.00528136	0.0521422	0.328895	0.363864	0.429322	1.20179	0.181297	-1.71141	1.59206	4.24917	4.39494	0.0059946	0.0224884	0.0023159	-0.012014	0.0348468	0.3116	0.346569
NM_001081009	Parp8	Bivalent	0.0722902	0.0876038	0.391985	0.203889	0.204611	1.55794	1.80395	1.46918	0.277193	2.43893	1.49591	1.50101	4.4297	4.64122	4.34507	0.0153136	0.319695	0.131599	0.132321	1.48565	1.73166	1.39689
NM_015803	Atp8a2	Bivalent	0.0279504	0.0610709	0.0893742	0.0627976	0.0955241	0.0760861	0.148855	0.565129	1.12762	1.67699	1.16784	1.773	1.44476	2.41297	4.33764	0.0331205	0.0614238	0.0348472	0.0675737	0.0481357	0.120905	0.537179
NM_008240	Foxj1	Bivalent	0.15033	0.0759564	0.0901779	0.373029	0.978506	2.6392	3.08712	3.03357	-0.98489	-0.737287	1.31115	2.70245	4.1339	4.36006	4.33481	-0.0743736	-0.0601521	0.222699	0.828176	2.48887	2.93679	2.88324
NM_001081172	Frmpd1	Bivalent	0.0124116	0.0439432	0.0319224	0.0164109	0.0341179	0.0125318	0.077725	0.246761	1.82395	1.36288	0.402965	1.45884	0.0139045	2.64669	4.31335	0.0315316	0.0195108	0.0039993	0.0217063	0.0001202	0.0653134	0.234349
NM_175170	Pogk	Bivalent	0.0822378	0.0608637	0.129788	0.028096	0.141729	0.249345	1.40276	1.61974	-0.43422	0.658283	-1.54944	0.785261	1.60027	4.09232	4.29982	-0.0213741	0.0475502	-0.0541418	0.0594912	0.167107	1.32052	1.5375
NM_012026	Arhgef28	Bivalent	0.189325	0.118833	0.389365	2.04944	5.43413	4.67761	2.7423	3.71393	-0.671929	1.04026	3.43629	4.84311	4.62683	3.85645	4.29401	-0.070492	0.20004	1.86012	5.2448	4.48828	2.55297	3.5246
NM_010801	Mlf1	Bivalent	0.292727	0.873111	1.03688	0.728578	1.0955	0.967944	4.16343	5.66155	1.57661	1.82462	1.31553	1.90396	1.72537	3.83014	4.27357	0.580384	0.744153	0.435851	0.802773	0.675217	3.8707	5.36882
NM_011267	Rgs16	Bivalent	0.0376034	0.0892335	0.141036	0.1673	0.279935	0.288151	0.351329	0.715706	1.24672	1.90713	2.1535	2.89616	2.93789	3.22389	4.25043	0.0516301	0.103433	0.129697	0.242332	0.250548	0.313726	0.678103
NM_027294	Cmtm8	Bivalent	0.172485	0.202356	0.116911	0.0431231	0.332493	0.468083	1.93065	3.22505	0.230425	-0.56106	-1.99994	0.946853	1.44029	3.48454	4.22478	0.029871	-0.055574	-0.129362	0.160008	0.295598	1.75816	3.05256
NM_009711	Artn	Bivalent	0.0235582	0	0.0262316	0	0.112395	0.262456	0.325142	0.438994	-10	0.155076	-10	2.25428	3.47777	3.78677	4.2199	-0.0235582	0.0026734	-0.0235582	0.0888368	0.238898	0.301584	0.415436
NM_182716	Nfasc	Bivalent	0.0891477	0.122523	0.052574	0.015453	0.0996401	0.219304	0.857355	1.633	0.458783	-0.761848	-2.52831	0.160529	1.29866	3.26562	4.19518	0.0333753	-0.0365737	-0.0736947	0.0104924	0.130156	0.768207	1.54385
NM_010820	Mpdz	Bivalent	0.380847	0.490769	0.647566	0.633548	0.942079	1.35654	2.65351	6.84539	0.365833	0.765816	0.734242	1.30664	1.83265	2.80062	4.16785	0.109922	0.266719	0.252701	0.561232	0.975693	2.27266	6.46454
NM_175427	Fam163b	Bivalent	0.012058	0.00358801	0.00928392	0.0133812	0.0269694	0.0665259	0.164723	0.213081	-1.74873	-0.377185	0.150217	1.16133	2.46393	3.77198	4.14334	-0.00846999	-0.00277408	0.0013232	0.0149114	0.0544679	0.152665	0.201023
NM_199449	Zhx2	Bivalent	0.122218	0.0389312	0.0291694	0.0272401	0.088891	0.0830939	0.286226	2.15612	-1.65046	-2.06693	-2.16565	-0.459348	-0.556642	1.2277	4.14091	-0.0832868	-0.0930486	-0.0949779	-0.033327	-0.0391241	0.164008	2.0339
NM_133897	Lrrc8c	Bivalent	0.243845	0.460313	0.229098	0.300902	0.488974	0.460364	1.23757	4.29893	0.916651	-0.0899995	0.303329	1.00379	0.916811	2.34347	4.13994	0.216468	-0.014747	0.057057	0.245129	0.216519	0.993725	4.05509
NM_001164518	Iglon5	Bivalent	0.013954	0.0254346	0.0545568	0.0350765	0.0900503	0.0657265	0.170285	0.244637	0.866114	1.96708	1.32983	2.69005	2.2358	3.6092	4.13189	0.0114806	0.0406028	0.0211225	0.0760963	0.0517725	0.156331	0.230683
NM_153512	Kcng3	Bivalent	0.124017	0.105531	0.109053	0.119928	0.955997	2.02743	0.923077	2.11205	-0.232871	-0.185508	-0.0483694	2.94647	4.03104	2.89591	4.09003	-0.018486	-0.014964	-0.004089	0.83198	1.90341	0.79906	1.98803
NM_007528	Bcl6b	Bivalent	0.0561055	0.0156817	0.0909566	0.289982	0.93327	3.16083	1.77608	0.950337	-1.83906	0.697036	2.36975	4.05608	5.81602	4.98441	4.08223	-0.0404238	0.0348511	0.233877	0.877165	3.10472	1.71997	0.894231
NM_001111016	Nav2	Bivalent	0.267511	0.0936821	0.652957	1.15095	3.38762	6.78764	4.40531	4.5129	-1.51375	1.28739	2.10516	3.6626	4.66524	4.04157	4.07638	-0.173829	0.385446	0.883439	3.12011	6.52013	4.1378	4.24539
NM_145152	Lrrc3	Bivalent	0.118483	0.120689	0.0549639	0.171169	0.379971	0.654393	1.25955	1.98009	0.0266141	-1.10812	0.530741	1.68121	2.46548	3.41016	4.06281	0.002206	-0.0635191	0.052686	0.261488	0.53591	1.14107	1.86161
NM_001160317	Nfasc	Bivalent	0.0650339	0.103498	0.0585467	0.059137	0.100737	0.336705	0.227908	1.08342	0.670339	-0.151604	-0.137131	0.63133	2.37222	1.80919	4.05826	0.0384641	-0.0064872	-0.0058969	0.0357031	0.271671	0.162874	1.01839
NM_030082	Hist3h2ba	Bivalent	14.7679	6.0072	13.5952	10.7902	22.1627	66.0179	207.055	244.532	-1.2977	-0.119367	-0.452743	0.585669	2.16039	3.80948	4.04949	-8.7607	-1.1727	-3.9777	7.3948	51.25	192.287	229.764
NM_008418	Kcna3	Bivalent	0.047623	0.0506971	0.0385817	0.0315425	0.279502	1.42735	0.848531	0.774592	0.0902447	-0.303742	-0.594361	2.55313	4.90554	4.15524	4.02371	0.0030741	-0.0090413	-0.0160805	0.231879	1.37973	0.800908	0.726969
NM_175234	Faxc	Bivalent	0.0904753	0.0446655	0.0445565	0.0323168	0.0603623	0.117058	0.458372	1.45805	-1.01836	-1.02189	-1.48524	-0.583876	0.371628	2.34092	4.01037	-0.0458098	-0.0459188	-0.0581585	-0.030113	0.0265827	0.367897	1.36757
NM_011613	Tnfsf11	Bivalent	0.0207515	0.285242	0.938542	1.27469	3.09739	2.9355	1.39814	0.331998	3.7809	5.49913	5.94079	7.22169	7.14425	6.07415	3.99989	0.264491	0.91779	1.25394	3.07664	2.91475	1.37739	0.311247
NM_009168	Shd	Bivalent	0.0416039	1.59639e-06	0	0.0118099	0.0259365	0.0655384	0.138848	0.655152	-14.6696	-10	-1.81672	-0.681735	0.655622	1.73872	3.97704	-0.0416023	-0.0416039	-0.029794	-0.0156674	0.0239345	0.0972441	0.613548
NM_021452	Kcnmb4	Bivalent	0.0543379	0.145482	0.0934089	0.0665417	0.0998211	0.0613071	0.20286	0.844181	1.42081	0.781601	0.2923	0.877386	0.174095	1.90045	3.95752	0.0911441	0.039071	0.0122038	0.0454832	0.0069692	0.148522	0.789843
NM_011214	Ptpru	Bivalent	0.150077	0.194626	0.0573593	0.0543869	0.276649	0.656816	1.87556	2.31395	0.375002	-1.3876	-1.46437	0.882354	2.12979	3.64355	3.94658	0.044549	-0.0927177	-0.0956901	0.126572	0.506739	1.72548	2.16387
NM_001081302	Trio	Bivalent	1.13067	1.1928	1.91263	1.41213	3.72892	14.5465	20.4494	17.4081	0.0771742	0.75838	0.320695	1.72158	3.68542	4.17681	3.94451	0.06213	0.78196	0.28146	2.59825	13.4158	19.3187	16.2774
NM_029049	Ptchd3	Bivalent	0.0149415	0.0825759	0.344199	0.0878585	0.0613423	0.224522	0.328283	0.229988	2.4664	4.52585	2.55586	2.03756	3.90946	4.45754	3.94416	0.0676344	0.329257	0.072917	0.0464008	0.209581	0.313341	0.215047
NM_001145162	Ube2ql1	Bivalent	0.0228782	0.0645687	0.0416151	0.0223976	0.0484707	0.0332928	0.177603	0.351173	1.49686	0.863134	-0.0306294	1.08314	0.541237	2.95661	3.94014	0.0416905	0.0187369	-0.0004806	0.0255925	0.0104146	0.154725	0.328295
NM_011227	Rab20	Bivalent	0.229052	0.235118	0.343026	0.220687	1.03002	1.81616	3.60859	3.4771	0.0377098	0.582643	-0.0536735	2.16893	2.98714	3.97769	3.92414	0.006066	0.113974	-0.008365	0.800968	1.58711	3.37954	3.24805
NM_011066	Per2	Bivalent	0.0317816	0.0340196	0.0446361	0.0351195	0.0774978	0.285792	0.665394	0.477436	0.0981744	0.490019	0.144081	1.28596	3.1687	4.38795	3.90904	0.002238	0.0128545	0.0033379	0.0457162	0.25401	0.633612	0.445654
NM_011595	Timp3	Bivalent	0.215278	0.293794	0.890246	1.25269	1.31942	1.93758	2.07551	3.23349	0.448604	2.048	2.54076	2.61563	3.16998	3.26919	3.90882	0.078516	0.674968	1.03741	1.10414	1.7223	1.86023	3.01821
NM_145986	Fam83f	Bivalent	0.0868627	0.0142591	0.0153035	0.0137728	0.0463126	0.0860194	0.736324	1.26932	-2.60685	-2.50488	-2.65691	-0.907332	-0.0140747	3.08353	3.86918	-0.0726036	-0.0715592	-0.0730899	-0.0405501	-0.0008433	0.649461	1.18246
NM_015775	Tmprss2	Bivalent	0.0355066	0.0575841	0.783788	0.386049	0.0836977	0.0247362	0.183689	0.511873	0.697583	4.4643	3.44262	1.2371	-0.521463	2.37111	3.84963	0.0220775	0.748281	0.350542	0.0481911	-0.0107704	0.148182	0.476366
NM_001168253	Fam83h	Bivalent	0.255096	0.330054	1.88296	2.28388	1.54171	1.27073	1.47777	3.66747	0.371662	2.88389	3.16237	2.59542	2.31655	2.53431	3.84567	0.074958	1.62786	2.02878	1.28661	1.01563	1.22267	3.41237
NM_008125	Gjb2	Bivalent	0.134411	0.106111	0.00790358	0	0.0208614	0.0180279	1.11672	1.92731	-0.341077	-4.088	-10	-2.68774	-2.89835	3.05454	3.84187	-0.0283	-0.126507	-0.134411	-0.11355	-0.116383	0.982309	1.7929
NM_027402	Fndc5	Bivalent	0.0783932	0.156297	0.259156	0.241687	0.298307	0.181065	0.619039	1.121	0.99549	1.72502	1.62434	1.928	1.20771	2.98123	3.83791	0.0779038	0.180763	0.163294	0.219914	0.102672	0.540646	1.04261
NM_011530	Tap2	Bivalent	0.095864	0.102025	0.0672581	0.0697215	0.253258	0.906044	1.73044	1.35142	0.0898617	-0.511281	-0.459386	1.40155	3.24052	4.17401	3.81734	0.006161	-0.0286059	-0.0261425	0.157394	0.81018	1.63458	1.25556
NM_028186	Nkd2	Bivalent	0.103259	0.18889	0.186412	0.116602	0.275872	0.449543	1.48039	1.44764	0.871279	0.852227	0.175325	1.41773	2.12219	3.84164	3.80936	0.085631	0.083153	0.013343	0.172613	0.346284	1.37713	1.34438
NM_008985	Ptprn	Bivalent	0.121781	0.0875929	1.62871	0.756511	1.05674	1.30975	1.08521	1.6847	-0.475403	3.74137	2.63507	3.11726	3.42693	3.15561	3.79013	-0.0341881	1.50693	0.63473	0.934959	1.18797	0.963429	1.56292
NM_020043	Igdcc4	Bivalent	0.333661	0.000341524	0.400816	0.713549	0.950367	1.47586	3.48428	4.55718	-9.93218	0.264557	1.09663	1.5101	2.1451	3.38441	3.77169	-0.333319	0.067155	0.379888	0.616706	1.1422	3.15062	4.22352
NM_001271409	Sorbs3	Bivalent	0.144996	0.150703	0.480676	0.272907	0.277608	0.388035	0.88623	1.97907	0.055695	1.72905	0.912396	0.937036	1.42017	2.61167	3.77074	0.005707	0.33568	0.127911	0.132612	0.243039	0.741234	1.83407
NM_001001804	Ephx4	Bivalent	0.0405006	0.18666	0.10375	0.0710243	0.102337	0.105894	0.347429	0.549403	2.2044	1.3571	0.810369	1.33731	1.38661	3.1007	3.76185	0.146159	0.0632494	0.0305237	0.0618364	0.0653934	0.306928	0.508902
NM_177157	Gchfr	Bivalent	0.223202	0.370815	0.542484	0.943269	3.0743	3.03531	4.06458	3.00114	0.73235	1.28123	2.07932	3.78384	3.76542	4.18668	3.74909	0.147613	0.319282	0.720067	2.8511	2.81211	3.84138	2.77794
NM_016705	Kif21a	Bivalent	0.335714	0.239935	0.048772	5.3688e-05	1.03014	4.37118	3.25031	4.44622	-0.484589	-2.78311	-12.6103	1.61754	3.70272	3.27527	3.72727	-0.095779	-0.286942	-0.33566	0.694426	4.03547	2.9146	4.11051
NM_013723	Podxl	Bivalent	1.69072	0.716238	1.864	2.88482	7.59635	14.8929	13.2435	22.057	-1.23913	0.140764	0.770844	2.16767	3.13892	2.96957	3.70553	-0.974482	0.17328	1.1941	5.90563	13.2022	11.5528	20.3663
NM_153565	Pcsk9	Bivalent	0.201448	0.240212	0.125669	0.33258	0.634485	2.13523	4.75738	2.59756	0.253901	-0.680779	0.723294	1.65518	3.40591	4.56169	3.68868	0.038764	-0.075779	0.131132	0.433037	1.93378	4.55593	2.39611
NM_001163589	Prph	Bivalent	0.356527	0.359354	0	0.21592	0.44304	0.747764	1.39298	4.49226	0.0113944	-10	-0.723514	0.313426	1.06857	1.96609	3.65536	0.002827	-0.356527	-0.140607	0.086513	0.391237	1.03645	4.13573
NM_027147	Enho	Bivalent	0.399009	0.178359	0.257736	0.383757	0.570944	1.27269	3.17685	4.98017	-1.16164	-0.630527	-0.0562282	0.516928	1.67339	2.9931	3.6417	-0.22065	-0.141273	-0.015252	0.171935	0.873681	2.77784	4.58116
NM_001135151	Slc39a14	Bivalent	0.247191	1.20191	4.44227	4.17805	3.64088	3.34138	2.25916	3.08334	2.28163	4.1676	4.07913	3.88059	3.75675	3.19209	3.6408	0.954719	4.19508	3.93086	3.39369	3.09419	2.01197	2.83615
NM_008430	Kcnk1	Bivalent	2.36499	2.56539	2.89909	2.63018	10.3043	15.9246	25.1769	28.8073	0.117344	0.293766	0.153327	2.12334	2.75135	3.41219	3.60653	0.2004	0.5341	0.26519	7.93931	13.5596	22.8119	26.4423
NM_019990	Stard10	Bivalent	1.42272	1.99604	2.48034	2.09234	3.94159	3.26287	10.8653	17.3295	0.488489	0.801886	0.556466	1.47013	1.19749	2.933	3.60651	0.57332	1.05762	0.66962	2.51887	1.84015	9.44258	15.9068
NM_174998	Hpcal4	Bivalent	0.0273072	0.0447454	0.100983	0.327895	0.635803	0.677517	0.441974	0.332261	0.712458	1.88676	3.58588	4.54123	4.6329	4.01661	3.60496	0.0174382	0.0736758	0.300588	0.608496	0.65021	0.414667	0.304954
NM_183152	Plk5	Bivalent	0.197367	0.3541	0.18847	0.403792	1.37084	1.29983	1.97136	2.39479	0.843276	-0.0665459	1.03273	2.79611	2.71937	3.32024	3.60095	0.156733	-0.008897	0.206425	1.17347	1.10246	1.77399	2.19742
NM_198306	Galnt9	Bivalent	0.0310155	0.0153769	0.00640255	0.0424362	0.0492075	0.0447456	0.188897	0.375174	-1.01222	-2.27627	0.452306	0.665889	0.528756	2.60654	3.5965	-0.0156386	-0.024613	0.0114207	0.018192	0.0137301	0.157882	0.344159
NM_008516	Lrrn1	Bivalent	0.138097	0.110809	0.0564553	0.149688	0.557921	0.546042	0.651923	1.64102	-0.317607	-1.2905	0.116277	2.01438	1.98333	2.23902	3.57084	-0.027288	-0.0816417	0.011591	0.419824	0.407945	0.513826	1.50292
NM_020605	Jph3	Bivalent	0.134667	0.130587	0.0515293	0.086551	0.0477858	0.0504641	0.440562	1.59618	-0.0443851	-1.38593	-0.637774	-1.49474	-1.41607	1.70995	3.56716	-0.00408	-0.0831377	-0.048116	-0.0868812	-0.0842029	0.305895	1.46151
NM_001037712	Kcnh6	Bivalent	0.0805066	0.0678893	0.0355857	0.0968813	0.185324	0.288394	0.674616	0.947909	-0.245923	-1.17781	0.267111	1.20287	1.84086	3.06689	3.55757	-0.0126173	-0.0449209	0.0163747	0.104817	0.207887	0.594109	0.867402
NM_013886	Hdgfrp3	Bivalent	0.434021	0.676846	0.902636	0.42975	0.442764	0.693254	2.80954	5.04808	0.641063	1.05638	-0.0142672	0.0287731	0.675619	2.6945	3.5399	0.242825	0.468615	-0.004271	0.008743	0.259233	2.37552	4.61406
NM_153546	Mboat1	Bivalent	0.161327	0.254518	0.151654	0.204405	0.487399	0.958419	1.53685	1.86883	0.65778	-0.0892044	0.341443	1.59512	2.57067	3.25192	3.53408	0.093191	-0.009673	0.043078	0.326072	0.797092	1.37552	1.7075
NM_013914	Snai3	Bivalent	0.238354	0.286805	4.81703	0.654931	0.4899	0.738377	2.17589	2.76027	0.266964	4.33697	1.45824	1.03938	1.63125	3.19043	3.53363	0.048451	4.57868	0.416577	0.251546	0.500023	1.93754	2.52192
NM_001081441	Wdr86	Bivalent	0.710417	0.154942	0.481119	1.31705	1.52593	1.86005	5.79719	8.10987	-2.19694	-0.562272	0.890572	1.10295	1.3886	3.02862	3.51294	-0.555475	-0.229298	0.606633	0.815513	1.14963	5.08677	7.39945
NM_007461	Apba2	Bivalent	0.121611	0.377753	0.37142	0.354406	0.512996	4.45056e-05	0.575047	1.36578	1.63517	1.61078	1.54313	2.07667	-11.416	2.24141	3.48938	0.256142	0.249809	0.232795	0.391385	-0.121566	0.453436	1.24417
NM_029100	Sepn1	Bivalent	0.376803	0.303461	0.0962133	0.130699	0.199623	0.272993	1.60191	4.17001	-0.312299	-1.9695	-1.52756	-0.916532	-0.464946	2.08791	3.46817	-0.073342	-0.28059	-0.246104	-0.17718	-0.10381	1.22511	3.79321
NM_130880	Otud7a	Bivalent	0.0497671	0.0710154	0.0476829	0.0464121	0.0597918	0.0445075	0.0718123	0.546611	0.51294	-0.0617203	-0.100691	0.264755	-0.161144	0.529039	3.45725	0.0212483	-0.0020842	-0.003355	0.0100247	-0.0052596	0.0220452	0.496844
NM_008748	Dusp8	Bivalent	0.0334177	0.0878465	0.00190423	0.00400504	0.0340666	0.0668992	0.108069	0.364373	1.39437	-4.13333	-3.06072	0.0277455	1.00138	1.69327	3.44673	0.0544288	-0.0315135	-0.0294127	0.0006489	0.0334815	0.0746513	0.330955
NM_029662	Mfsd2a	Bivalent	0.0392369	0.111629	0.215819	0.126386	0.231343	0.723632	1.35866	0.424658	1.50843	2.45954	1.68755	2.55975	4.20497	5.11383	3.43602	0.0723921	0.176582	0.0871491	0.192106	0.684395	1.31942	0.385421
NM_172659	Slc2a6	Bivalent	0.0428473	6.5597e-07	0.0223159	6.23222e-07	5.8564e-07	0.0391137	0.116134	0.462725	-15.9952	-0.941132	-16.0691	-16.1588	-0.13153	1.43851	3.43288	-0.0428466	-0.0205314	-0.0428467	-0.0428467	-0.0037336	0.0732867	0.419878
NM_011894	Sh3bp5	Bivalent	0.132205	0.351001	0.306882	0.131906	0.191676	0.282009	0.754804	1.37875	1.4087	1.21491	-0.00326655	0.535893	1.09296	2.51333	3.38251	0.218796	0.174677	-0.000299	0.059471	0.149804	0.622599	1.24655
NM_001081252	Uggt2	Bivalent	0.173409	0.252442	0.248144	0.198825	0.215762	0.272261	0.753718	1.80491	0.541773	0.516999	0.19732	0.315262	0.650812	2.11985	3.37968	0.079033	0.074735	0.025416	0.042353	0.098852	0.580309	1.6315
NM_009898	Coro1a	Bivalent	0.678867	0.780023	0.501739	0.730214	1.28248	1.19219	2.77228	7.00179	0.200388	-0.436192	0.10519	0.917735	0.812413	2.02987	3.36652	0.101156	-0.177128	0.051347	0.603613	0.513323	2.09341	6.32292
NM_028326	Zfp618	Bivalent	0.0442162	0.0864267	0.126454	0.195061	0.155171	0.323464	0.444309	0.450757	0.966902	1.51597	2.14128	1.81121	2.87096	3.32892	3.3497	0.0422105	0.0822378	0.150845	0.110955	0.279248	0.400093	0.406541
NM_013585	Psmb9	Bivalent	0.328193	0.489629	0.271125	0.221784	0.768411	1.64853	4.0809	3.337	0.577145	-0.275586	-0.565389	1.22733	2.32856	3.63627	3.34594	0.161436	-0.057068	-0.106409	0.440218	1.32034	3.75271	3.00881
NM_145144	Aif1l	Bivalent	0.700997	1.08758	0.381741	0.478974	1.47065	3.81801	8.79877	7.08655	0.633641	-0.876814	-0.549461	1.06897	2.44534	3.64982	3.3376	0.386583	-0.319256	-0.222023	0.769653	3.11701	8.09777	6.38555
NM_177572	Rimkla	Bivalent	0.237443	0.293128	0.481761	0.288893	0.190581	0.38078	1.36619	2.39677	0.30395	1.02074	0.282954	-0.317177	0.681376	2.52451	3.33544	0.055685	0.244318	0.05145	-0.046862	0.143337	1.12875	2.15933
NM_172788	Sh3rf3	Bivalent	0.0457449	0.0362889	0.0717294	0.049355	0.0432053	0.0174925	0.0949201	0.4539	-0.334083	0.648954	0.109585	-0.0824026	-1.38687	1.0531	3.31069	-0.009456	0.0259845	0.0036101	-0.0025396	-0.0282524	0.0491752	0.408155
NM_008285	Hrh1	Bivalent	0.065107	0.0223383	0.0167982	0.0181098	0.0309692	0	0.194559	0.643412	-1.54329	-1.95451	-1.84604	-1.07198	-10	1.57932	3.30486	-0.0427687	-0.0483088	-0.0469972	-0.0341378	-0.065107	0.129452	0.578305
NM_139298	Wnt9a	Bivalent	0.0656599	0.0646082	0.0746462	0.0509161	0.104315	0.175539	0.355173	0.643174	-0.0232953	0.185056	-0.366891	0.667862	1.41871	2.43544	3.29212	-0.0010517	0.0089863	-0.0147438	0.0386551	0.109879	0.289513	0.577514
NM_020604	Jph1	Bivalent	0.391504	0.379487	0.552201	0.810383	2.8014	4.19759	3.71171	3.81765	-0.0449766	0.496166	1.04958	2.83905	3.42246	3.24499	3.28559	-0.012017	0.160697	0.418879	2.4099	3.80609	3.32021	3.42615
NM_172786	Il20ra	Bivalent	0.0306635	0.0419382	0.118833	0.163018	0.326155	0.180858	0.355713	0.297417	0.451743	1.95434	2.41044	3.41096	2.56026	3.53612	3.27789	0.0112747	0.0881695	0.132354	0.295491	0.150194	0.325049	0.266753
NM_008940	Klk8	Bivalent	0.844523	1.03459	2.7219	3.02794	3.61069	2.12653	3.84413	8.14891	0.292851	1.68841	1.84213	2.09607	1.33229	2.18645	3.2704	0.190067	1.87738	2.18342	2.76617	1.28201	2.99961	7.30439
NM_026496	Grhl2	Bivalent	1.2262	1.20404	2.86063	11.1045	30.2779	28.4321	14.6412	11.741	-0.026311	1.22214	3.17888	4.626	4.53525	3.57777	3.25929	-0.02216	1.63443	9.8783	29.0517	27.2059	13.415	10.5148
NM_153081	Slc16a11	Bivalent	0.0589683	0.0576805	0.11621	0.024064	0.0708174	0.0596773	0.197123	0.554453	-0.0318559	0.978723	-1.29306	0.264164	0.0172427	1.74108	3.23305	-0.0012878	0.0572417	-0.0349043	0.0118491	0.000709	0.138155	0.495485
NM_021885	Tub	Bivalent	0.349126	0.440599	0.748992	0.672887	0.635155	0.983707	2.37755	3.27405	0.335718	1.1012	0.946616	0.863361	1.49448	2.76766	3.22926	0.091473	0.399866	0.323761	0.286029	0.634581	2.02842	2.92492
NM_009521	Wnt3	Bivalent	0.116826	0.128233	0.0297629	0.00946332	0.018878	0.450584	0.990761	1.09366	0.134406	-1.97277	-3.62587	-2.62958	1.94743	3.08418	3.22673	0.011407	-0.0870631	-0.107363	-0.097948	0.333758	0.873935	0.976834
NM_025869	Dusp26	Bivalent	0.156758	0.108505	0.0110272	0.0117224	0.218281	0.211167	0.564163	1.46359	-0.530778	-3.8294	-3.7412	0.477647	0.429845	1.84757	3.2229	-0.048253	-0.145731	-0.145036	0.061523	0.054409	0.407405	1.30683
NM_029005	Mlkl	Bivalent	0.0742653	0.0979509	0.311296	0.138537	0.278745	0.390989	0.786623	0.684036	0.39937	2.06753	0.899511	1.90819	2.39637	3.40491	3.20331	0.0236856	0.237031	0.0642717	0.20448	0.316724	0.712358	0.609771
NM_175483	Snx33	Bivalent	0.183745	0.253989	0.288072	0.114289	0.134199	0.559224	1.09854	1.66166	0.467061	0.648724	-0.685018	-0.453331	1.60572	2.57981	3.17685	0.070244	0.104327	-0.069456	-0.049546	0.375479	0.914795	1.47791
NM_029007	Fam84a	Bivalent	0.0673409	0.269619	0.296054	0.384416	0.849083	0.6858	0.461541	0.606307	2.00137	2.13631	2.51311	3.65635	3.34823	2.7769	3.17049	0.202278	0.228713	0.317075	0.781742	0.618459	0.3942	0.538966
NM_010360	Gstm5	Bivalent	1.41666	1.52825	1.38946	1.30049	1.82663	2.49527	7.48009	12.6878	0.109387	-0.0279692	-0.123438	0.366691	0.816702	2.40056	3.16288	0.11159	-0.0272	-0.11617	0.40997	1.07861	6.06343	11.2711
NM_177763	Lhfpl4	Bivalent	0.0758535	0.0311022	0.0379721	0.0561832	0.093641	0.139164	0.324896	0.676769	-1.2862	-0.998276	-0.433077	0.303925	0.875498	2.09869	3.15738	-0.0447513	-0.0378814	-0.0196703	0.0177875	0.0633105	0.249042	0.600915
NM_009382	Thy1	Bivalent	0.551971	0.425099	0.573902	1.84501	2.58388	1.52645	3.11001	4.8564	-0.376794	0.0562119	1.74096	2.22687	1.46752	2.49425	3.13722	-0.126872	0.021931	1.29304	2.03191	0.974479	2.55804	4.30443
NM_009931	Col4a1	Bivalent	0.658925	0.527963	1.46807	1.60913	1.04189	0.950682	2.53012	5.76677	-0.319677	1.15573	1.28809	0.661017	0.528849	1.94102	3.12958	-0.130962	0.809145	0.950205	0.382965	0.291757	1.8712	5.10785
NM_001001985	Nat8l	Bivalent	0.111742	0.0936286	0.0879281	0.0860131	0.152531	0.249179	0.988164	0.9731	-0.25515	-0.345775	-0.377543	0.448931	1.15701	3.14458	3.12242	-0.0181134	-0.0238139	-0.0257289	0.040789	0.137437	0.876422	0.861358
NM_001033206	Pwwp2b	Bivalent	0.227824	0.0642967	0.49165	0.59567	1.14952	0.611767	2.21122	1.98088	-1.8251	1.10971	1.38659	2.33504	1.42506	3.27885	3.12015	-0.163527	0.263826	0.367846	0.921696	0.383943	1.9834	1.75306
NM_023908	Slco3a1	Bivalent	0.0643924	0.0932357	0.122085	0.0678375	0.0828031	0.0526806	0.38841	0.557186	0.533992	0.922924	0.0751926	0.362794	-0.289619	2.59262	3.1132	0.0288433	0.0576926	0.0034451	0.0184107	-0.0117118	0.324018	0.492794
NM_001162977	Megf6	Bivalent	0.150415	0.143849	0.0860263	0.172116	0.390463	0.873003	1.15643	1.297	-0.0643933	-0.806099	0.194433	1.37624	2.53704	2.94266	3.10816	-0.006566	-0.0643887	0.021701	0.240048	0.722588	1.00602	1.14658
NM_007559	Bmp8b	Bivalent	0.0430722	0.0765496	1.52299	0.459429	0.169129	0.151185	0.605886	0.371212	0.829638	5.14401	3.41501	1.9733	1.81149	3.81422	3.10741	0.0334774	1.47992	0.416357	0.126057	0.108113	0.562814	0.32814
NM_176860	Ubash3b	Bivalent	0.0913885	0.0994064	0.729462	0.095421	0.105937	0.110581	0.364475	0.782063	0.121326	2.99675	0.0622942	0.213122	0.275019	1.99574	3.0972	0.0080179	0.638074	0.0040325	0.0145485	0.0191925	0.273087	0.690674
NM_011643	Trpc1	Bivalent	0.190632	0.250987	0.235894	0.103542	0.317044	0.338176	0.893629	1.62356	0.396822	0.307348	-0.880574	0.733893	0.826984	2.22889	3.0903	0.060355	0.045262	-0.08709	0.126412	0.147544	0.702997	1.43293
NM_001082483	Efr3b	Bivalent	0.317001	2.48258	2.09049	0.697729	1.93493	1.7448	1.63763	2.66272	2.96928	2.72128	1.13818	2.60972	2.4605	2.36905	3.07034	2.16558	1.77349	0.380728	1.61793	1.4278	1.32063	2.34572
NM_025424	Nenf	Bivalent	2.12671	3.41473	2.09983	1.83724	3.28934	3.58773	9.86457	17.7725	0.683148	-0.0183508	-0.211083	0.629175	0.754448	2.21363	3.06295	1.28802	-0.02688	-0.28947	1.16263	1.46102	7.73786	15.6458
NM_052994	Spock2	Bivalent	0.699259	0.761943	0.371296	1.29649	2.41281	1.85955	3.14444	5.76944	0.123856	-0.913257	0.890712	1.78682	1.41105	2.1689	3.04453	0.062684	-0.327963	0.597231	1.71355	1.16029	2.44518	5.07018
NM_133183	Cacng6	Bivalent	0.278008	0.52526	0.169119	0.447185	0.806272	0.557974	1.28721	2.28891	0.917905	-0.717088	0.685745	1.53614	1.00507	2.21105	3.04146	0.247252	-0.108889	0.169177	0.528264	0.279966	1.0092	2.0109
NM_001276489	Ism1	Bivalent	0.0283609	0.0801659	0.145962	0.0438144	0.0232854	0.0467192	0.0950836	0.233379	1.49909	2.36362	0.627502	-0.284478	0.720112	1.74529	3.0407	0.051805	0.117601	0.0154535	-0.0050755	0.0183583	0.0667227	0.205018
NM_001252072	Hs3st4	Bivalent	0.0341333	0.0449098	0.0419815	0.1374	0.165503	0.1155	0.2351	0.275065	0.39585	0.298574	2.00913	2.27761	1.75864	2.78402	3.01052	0.0107765	0.0078482	0.103267	0.13137	0.0813667	0.200967	0.240932
NM_138683	Rspo1	Bivalent	0.141229	0.18338	0.146071	0.355646	0.796643	1.48329	1.45018	1.12747	0.3768	0.0486334	1.33241	2.4959	3.39269	3.36012	2.99698	0.042151	0.004842	0.214417	0.655414	1.34206	1.30895	0.986241
NM_029077	Trim14	Bivalent	0.0964198	0.0164156	0.0203151	0.0669652	0.130146	0.199963	0.478758	0.767249	-2.55426	-2.24678	-0.525918	0.43273	1.05233	2.3119	2.99229	-0.0800042	-0.0761047	-0.0294546	0.0337262	0.103543	0.382338	0.670829
NM_001199217	Slc38a3	Bivalent	0.0844257	0.062071	0.0999627	0.277039	0.196121	0.283821	0.621551	0.655545	-0.443763	0.243708	1.71433	1.21599	1.74923	2.88012	2.95694	-0.0223547	0.015537	0.192613	0.111695	0.199395	0.537125	0.571119
NM_177615	Slc26a10	Bivalent	0.1516	0.0551081	0.169921	0.330876	0.224463	0.188622	0.393948	1.15979	-1.45993	0.164594	1.12602	0.566208	0.315228	1.37774	2.93552	-0.0964919	0.018321	0.179276	0.072863	0.037022	0.242348	1.00819
NM_029537	Tmem98	Bivalent	1.6701	0.958029	0.63243	0.656226	1.27677	6.26588	8.91515	12.7627	-0.801793	-1.40096	-1.34767	-0.387436	1.90758	2.41632	2.93393	-0.712071	-1.03767	-1.01387	-0.39333	4.59578	7.24505	11.0926
NM_009208	Slc4a3	Bivalent	0.173457	0.119631	0.151494	0.383001	0.516037	0.562672	1.23172	1.32337	-0.535987	-0.195317	1.14277	1.5729	1.69772	2.82802	2.93157	-0.053826	-0.021963	0.209544	0.34258	0.389215	1.05826	1.14991
NM_031199	Tgfa	Bivalent	0.155799	0.278985	0.0969794	0.0419641	0.0573343	0.0980996	0.433426	1.18831	0.840502	-0.683936	-1.89246	-1.44222	-0.667367	1.4761	2.93115	0.123186	-0.0588196	-0.113835	-0.0984647	-0.0576994	0.277627	1.03251
NM_019510	Trpc3	Bivalent	0.0293396	0.0637422	0.024743	0.040879	0.018564	0.0461979	0.200004	0.223421	1.1194	-0.245829	0.478511	-0.660342	0.654978	2.76911	2.92884	0.0344026	-0.0045966	0.0115394	-0.0107756	0.0168583	0.170664	0.194081
NM_173014	Lpcat2	Bivalent	0.0704904	0.0465318	0.142591	0.0690461	0.13913	0.11558	0.418268	0.534446	-0.59921	1.01638	-0.0298669	0.980935	0.713393	2.56893	2.92255	-0.0239586	0.0721006	-0.0014443	0.0686396	0.0450896	0.347778	0.463956
NM_022982	Rtn4r	Bivalent	0.0596002	0.0182026	0	0	0	0.0376345	0.0892457	0.442968	-1.71117	-10	-10	-10	-0.663261	0.582465	2.89381	-0.0413976	-0.0596002	-0.0596002	-0.0596002	-0.0219657	0.0296455	0.383368
NM_008113	Arhgdig	Bivalent	1.56815	2.28489	1.6261	2.65517	5.99245	6.61493	13.081	11.4613	0.543061	0.0523524	0.759741	1.93408	2.07666	3.06034	2.86964	0.71674	0.05795	1.08702	4.4243	5.04678	11.5129	9.89315
NM_144867	Slmo1	Bivalent	0.207974	0.162712	0.217221	0.303132	0.511917	0.941722	1.80584	1.51642	-0.354083	0.0627604	0.543543	1.29951	2.1789	3.11819	2.86619	-0.045262	0.009247	0.095158	0.303943	0.733748	1.59787	1.30845
NM_019790	Tmeff2	Bivalent	0.0599061	0.0675874	0.0356418	0.0177773	0.0822807	0.0858302	0.140862	0.432024	0.174051	-0.749133	-1.75267	0.457851	0.518782	1.23351	2.85034	0.0076813	-0.0242643	-0.0421288	0.0223746	0.0259241	0.0809559	0.372118
NM_009794	Capn2	Bivalent	1.19065	1.09834	3.0638	1.92751	1.89756	1.56675	2.00112	8.58539	-0.116425	1.36357	0.694989	0.672396	0.396026	0.749058	2.85013	-0.09231	1.87315	0.73686	0.70691	0.3761	0.81047	7.39474
NM_133769	Cyfip2	Bivalent	1.76585	1.62561	0.946902	1.22492	2.01596	1.63886	5.07759	12.5999	-0.119382	-0.899076	-0.527675	0.191104	-0.10767	1.52378	2.83498	-0.14024	-0.818948	-0.54093	0.25011	-0.12699	3.31174	10.834
NM_001039385	Vgf	Bivalent	0.04271	0.0469878	0.360677	0.071538	0.124372	0.203484	0.395615	0.303515	0.137712	3.07806	0.744136	1.54202	2.25227	3.21145	2.82912	0.0042778	0.317967	0.028828	0.081662	0.160774	0.352905	0.260805
NM_028974	Kbtbd13	Bivalent	0.0873097	0.116225	0.145931	0.137461	0.25289	0.209401	1.02106	0.616932	0.412707	0.741073	0.654809	1.5343	1.26205	3.54778	2.8209	0.0289153	0.0586213	0.0501513	0.16558	0.122091	0.93375	0.529622
NM_027468	Cpm	Bivalent	0.072635	0.104994	0.265694	0.0913197	0.109441	0.252159	0.398294	0.50863	0.53157	1.87103	0.330261	0.591417	1.7956	2.4551	2.80788	0.032359	0.193059	0.0186847	0.036806	0.179524	0.325659	0.435995
NM_001145885	Ddx4	Bivalent	0.773538	1.01624	2.54376	2.04499	1.55974	1.89949	4.76358	5.34661	0.393697	1.71742	1.40255	1.01176	1.29607	2.6225	2.78908	0.242702	1.77022	1.27145	0.786202	1.12595	3.99004	4.57307
NM_172393	Aim1	Bivalent	0.0557961	0.067645	0.341681	0.119354	0.441081	0.34758	0.239116	0.384499	0.277819	2.61441	1.09701	2.98281	2.63911	2.09947	2.78474	0.0118489	0.285885	0.0635579	0.385285	0.291784	0.18332	0.328703
NM_001277170	Rbm46	Bivalent	0.0685842	0.110477	0.258265	0.0702217	0.0490195	0.0646806	0.759755	0.471601	0.687798	1.9129	0.0340407	-0.48452	-0.0845432	3.46959	2.78162	0.0418928	0.189681	0.0016375	-0.0195647	-0.0039036	0.691171	0.403017
NM_033327	Zfp423	Bivalent	0.387968	0.344819	4.59139	8.016	5.79071	3.81931	3.46861	2.62978	-0.170098	3.56492	4.36887	3.89973	3.2993	3.16035	2.76093	-0.043149	4.20342	7.62803	5.40274	3.43134	3.08064	2.24181
NM_175430	Ccdc40	Bivalent	0.209181	0.172573	0.079988	0.120058	0.276525	1.24806	2.13862	1.40924	-0.277545	-1.3869	-0.80102	0.402658	2.57686	3.35386	2.75209	-0.036608	-0.129193	-0.089123	0.067344	1.03888	1.92944	1.20006
NM_001270646	Prob1	Bivalent	0.236116	0.29739	0.488739	0.377314	0.842372	2.32119	1.601	1.56272	0.33286	1.04957	0.67627	1.83496	3.2973	2.76141	2.72649	0.061274	0.252623	0.141198	0.606256	2.08507	1.36488	1.3266
NM_028266	Col16a1	Bivalent	0.0323956	0.0868723	0.0259635	0.0420307	0.044617	0.0739347	0.187105	0.213934	1.4231	-0.319313	0.375646	0.461796	1.19045	2.52998	2.7233	0.0544767	-0.0064321	0.0096351	0.0122214	0.0415391	0.154709	0.181538
NM_001162532	Fam174b	Bivalent	0.287013	0.334946	0.850828	0.772899	0.968281	1.21976	2.47419	1.8881	0.222812	1.56775	1.42916	1.75431	2.08741	3.10777	2.71775	0.047933	0.563815	0.485886	0.681268	0.932747	2.18718	1.60109
NM_001011732	Xkr7	Bivalent	0.0575172	0.0555144	0.0476139	0.0449714	0.0364766	0.0670322	0.191378	0.378094	-0.0511314	-0.272611	-0.354986	-0.657022	0.220861	1.73436	2.71668	-0.0020028	-0.0099033	-0.0125458	-0.0210406	0.009515	0.133861	0.320577
NM_010634	Fabp5	Bivalent	3.92945	3.42224	3.9671	3.50201	8.52874	18.4009	33.4566	25.6848	-0.199386	0.0137574	-0.166144	1.11801	2.22738	3.08989	2.70852	-0.50721	0.03765	-0.42744	4.59929	14.4715	29.5272	21.7553
NM_025276	Evpl	Bivalent	0.188838	0.236338	0.0671848	0.0798849	0.164809	0.392317	0.993296	1.23258	0.323703	-1.49094	-1.24115	-0.196354	1.05487	2.39507	2.70646	0.0475	-0.121653	-0.108953	-0.024029	0.203479	0.804458	1.04374
NM_001081428	Fam184a	Bivalent	0.237206	0.237806	0.265419	0.243095	0.22604	0.118998	0.726254	1.54476	0.00364461	0.162131	0.0353797	-0.0695624	-0.995203	1.61433	2.70317	0.0006	0.028213	0.005889	-0.011166	-0.118208	0.489048	1.30755
NM_183024	Raver2	Bivalent	2.32314	2.30202	1.7405	2.97313	5.11821	5.77847	10.856	15.0858	-0.0131757	-0.416574	0.355906	1.13956	1.31461	2.22434	2.69904	-0.02112	-0.58264	0.64999	2.79507	3.45533	8.53286	12.7627
NM_172525	Arhgap29	Bivalent	0.965093	1.47373	3.91022	3.32389	5.08168	5.27748	7.45632	6.22312	0.610732	2.01851	1.78413	2.39657	2.45111	2.94972	2.6889	0.508637	2.94513	2.3588	4.11659	4.31239	6.49123	5.25803
NM_024469	Bhlhe41	Bivalent	0.0736108	0.0440287	0.00147279	0	0.00956302	0.147121	0.113121	0.470357	-0.741473	-5.64329	-10	-2.94438	0.999014	0.619877	2.67577	-0.0295821	-0.072138	-0.0736108	-0.0640478	0.0735102	0.0395102	0.396746
NM_008158	Gpr27	Bivalent	0.174716	0.0519471	0.142966	0.0378593	0.0282051	0.071274	0.409603	1.10907	-1.7499	-0.28934	-2.20629	-2.63098	-1.29356	1.22921	2.66627	-0.122769	-0.03175	-0.136857	-0.146511	-0.103442	0.234887	0.934354
NM_026385	Pllp	Bivalent	0.151901	0.229665	0.188104	0.924948	0.820316	0.764902	2.29925	0.939491	0.5964	0.308399	2.60624	2.43305	2.33214	3.91996	2.62875	0.077764	0.036203	0.773047	0.668415	0.613001	2.14735	0.78759
NM_001033208	Myzap	Bivalent	0.0800719	0.114796	0.103403	0.194707	0.539169	0.466996	0.925831	0.490439	0.519704	0.36891	1.28194	2.75137	2.54404	3.53138	2.61471	0.0347241	0.0233311	0.114635	0.459097	0.386924	0.845759	0.410367
NM_011171	Procr	Bivalent	0.124815	0.137284	0.221734	0.164025	0.167479	0.0948701	0.221396	0.732111	0.137372	0.829039	0.394124	0.424189	-0.395766	0.826838	2.55227	0.012469	0.096919	0.03921	0.042664	-0.0299449	0.096581	0.607296
NM_018760	Slc4a4	Bivalent	0.158865	0.286997	0.211542	0.179277	0.120203	8.02447e-06	0.238049	0.929727	0.853234	0.413143	0.174389	-0.402328	-14.273	0.583457	2.54901	0.128132	0.052677	0.020412	-0.038662	-0.158857	0.079184	0.770862
NM_001042502	Pitx2	Bivalent	0.324521	0.314268	0.102823	0.0732841	0.706243	1.53519	2.22155	1.86736	-0.0463165	-1.65815	-2.14674	1.12185	2.24203	2.77518	2.52462	-0.010253	-0.221698	-0.251237	0.381722	1.21067	1.89703	1.54284
NM_148935	Foxn4	Bivalent	0.0870597	0.162575	0.0530405	0.223855	0.80964	1.61035	2.2107	0.499497	0.901028	-0.714911	1.36249	3.2172	4.20923	4.66635	2.5204	0.0755153	-0.0340192	0.136795	0.72258	1.52329	2.12364	0.412437
NM_178396	Car12	Bivalent	0.22746	0.0951996	0.0370626	0.048816	0.0739528	0.129846	0.755691	1.29309	-1.25659	-2.61758	-2.22019	-1.62094	-0.808811	1.73218	2.50714	-0.13226	-0.190397	-0.178644	-0.153507	-0.097614	0.528231	1.06563
NM_008037	Fosl2	Bivalent	0.076825	0.274798	0.0598531	0.0204303	0.0361837	0.0675987	0.156949	0.431126	1.83872	-0.36015	-1.91087	-1.08624	-0.18458	1.03065	2.48846	0.197973	-0.0169719	-0.0563947	-0.0406413	-0.0092263	0.080124	0.354301
NM_153107	Cpz	Bivalent	0.306323	0.157058	0.0952494	0.182143	0.390729	0.367115	0.87795	1.71171	-0.963756	-1.68527	-0.749982	0.351115	0.261178	1.51909	2.48231	-0.149265	-0.211074	-0.12418	0.084406	0.060792	0.571627	1.40539
NM_025815	Cpne8	Bivalent	0.157165	0.0794135	0.0612002	0.024665	0.00903875	0.0296075	0.190924	0.866522	-0.984824	-1.36067	-2.67174	-4.12001	-2.40825	0.280718	2.46296	-0.0777515	-0.0959648	-0.1325	-0.148126	-0.127557	0.033759	0.709357
NM_001081120	Fam89a	Bivalent	0.17485	0.0968004	0.159072	0.243835	0.772996	0.655249	0.603909	0.961357	-0.853033	-0.136438	0.479787	2.14434	1.90593	1.78821	2.45895	-0.0780496	-0.015778	0.068985	0.598146	0.480399	0.429059	0.786507
NM_001198835	Coch	Bivalent	0.123072	0.350206	1.65439	0.374566	0.373255	0.690117	0.615214	0.676526	1.5087	3.74872	1.60572	1.60066	2.48734	2.32159	2.45864	0.227134	1.53132	0.251494	0.250183	0.567045	0.492142	0.553454
NM_001081289	Fam217b	Bivalent	0.110271	0.0960549	0.240681	0.206712	0.226597	0.289356	0.829907	0.604251	-0.199122	1.12607	0.906569	1.03908	1.39179	2.9119	2.45409	-0.0142161	0.13041	0.096441	0.116326	0.179085	0.719636	0.49398
NM_021458	Fzd3	Bivalent	0.441021	0.771021	0.944805	0.496383	0.46496	0.437893	1.46984	2.40696	0.805923	1.09917	0.170606	0.0762593	-0.010269	1.73674	2.44829	0.33	0.503784	0.055362	0.023939	-0.003128	1.02882	1.96594
NM_026418	Rgs10	Bivalent	1.16411	2.34829	1.50836	1.65278	3.2754	3.59179	6.67195	6.31557	1.01238	0.373753	0.505667	1.49244	1.62548	2.51888	2.43969	1.18418	0.34425	0.48867	2.11129	2.42768	5.50784	5.15146
NM_018741	Igfbpl1	Bivalent	0.205194	0.174272	0.18403	0.36065	0.843896	0.753112	1.11283	1.11301	-0.235648	-0.157048	0.813611	2.04008	1.87588	2.43917	2.43941	-0.030922	-0.021164	0.155456	0.638702	0.547918	0.907636	0.907816
NM_008915	Ppp3cc	Bivalent	0.320739	0.291444	0.504447	0.375647	0.409042	0.229753	0.636937	1.70146	-0.138181	0.653303	0.227978	0.350849	-0.481316	0.989751	2.4073	-0.029295	0.183708	0.054908	0.088303	-0.090986	0.316198	1.38072
NM_138650	Dgkg	Bivalent	0.0791194	0.0591128	0.0228506	0.0517958	0.274013	0.291699	0.545069	0.413439	-0.420561	-1.7918	-0.611196	1.79214	1.88238	2.78434	2.38557	-0.0200066	-0.0562688	-0.0273236	0.194894	0.21258	0.46595	0.33432
NM_178406	Gpr153	Bivalent	0.161449	0.100829	0.0989422	0.124665	0.310033	0.304419	0.361515	0.839158	-0.679168	-0.706421	-0.373022	0.941343	0.91498	1.16298	2.37786	-0.06062	-0.0625068	-0.036784	0.148584	0.14297	0.200066	0.677709
NM_029658	Fam101b	Bivalent	0.243945	0.549594	0.269568	0.124487	0.144575	0.304136	1.04176	1.26274	1.17181	0.144093	-0.970561	-0.754738	0.318161	2.0944	2.37193	0.305649	0.025623	-0.119458	-0.09937	0.060191	0.797815	1.01879
NM_010043	Des	Bivalent	0.646477	0.675146	0.73802	0.858122	1.15994	0.525661	1.63628	3.33981	0.0626005	0.191061	0.408584	0.843379	-0.298466	1.33975	2.3691	0.028669	0.091543	0.211645	0.513463	-0.120816	0.989803	2.69333
NM_010311	Gnaz	Bivalent	0.383034	0.471395	0.486249	0.774216	0.643906	0.577766	1.52991	1.95984	0.299464	0.344223	1.01526	0.749378	0.593013	1.9979	2.35519	0.088361	0.103215	0.391182	0.260872	0.194732	1.14688	1.57681
NM_011594	Timp2	Bivalent	0.237619	0.393295	0.180315	0.100115	0.0459984	0.0322269	0.368879	1.1671	0.726962	-0.398131	-1.24699	-2.36899	-2.88231	0.634497	2.29621	0.155676	-0.057304	-0.137504	-0.191621	-0.205392	0.13126	0.929481
NM_011817	Gadd45g	Bivalent	0.581969	0.234084	0.15274	2.20657	25.1851	32.4715	12.7461	2.81102	-1.31392	-1.92986	1.92279	5.43548	5.80209	4.45297	2.27208	-0.347885	-0.429229	1.6246	24.6031	31.8895	12.1641	2.22905
NM_153509	AF529169	Bivalent	0.105268	0.0420841	0.123706	0.079592	0.0557154	0.0893376	0.214571	0.508333	-1.32272	0.232849	-0.403372	-0.917919	-0.236728	1.02739	2.27171	-0.0631839	0.018438	-0.025676	-0.0495526	-0.0159304	0.109303	0.403065
NM_001144993	2810459M11Rik	Bivalent	0.107462	5.55447e-06	4.94427e-06	0.10093	0.316703	0.774357	1.09444	0.515292	-14.2398	-14.4077	-0.0904715	1.5593	2.84917	3.34829	2.26156	-0.107456	-0.107457	-0.006532	0.209241	0.666895	0.986978	0.40783
NM_001001488	Atp8b1	Bivalent	0.0599779	0.0910128	0.127488	0.0564284	0.219315	0.367677	0.417881	0.286995	0.601638	1.08786	-0.0880096	1.8705	2.61594	2.80059	2.25852	0.0310349	0.0675101	-0.0035495	0.159337	0.307699	0.357903	0.227017
NM_008168	Grik5	Bivalent	0.488099	0.264801	0.1731	0.24184	0.390958	1.19688	1.89879	2.33463	-0.882265	-1.49557	-1.01312	-0.32016	1.29403	1.95983	2.25795	-0.223298	-0.314999	-0.246259	-0.097141	0.708781	1.41069	1.84653
NM_172751	Arhgef10	Bivalent	0.45296	0.761791	0.273552	0.429388	0.355573	0.273373	0.536795	2.1613	0.750012	-0.727569	-0.0771018	-0.349238	-0.728513	0.244988	2.25444	0.308831	-0.179408	-0.023572	-0.097387	-0.179587	0.083835	1.70834
NM_008420	Kcnb1	Bivalent	0.0985498	0.099195	0.0357449	0.163922	0.352997	0.31303	0.454365	0.468418	0.00941446	-1.46312	0.734085	1.84073	1.66738	2.20493	2.24887	0.0006452	-0.0628049	0.0653722	0.254447	0.21448	0.355815	0.369868
NM_147776	Vwa1	Bivalent	0.107065	0.0442963	0.143335	0.303146	0.575857	1.03725	0.691339	0.502651	-1.27323	0.420904	1.50153	2.42722	3.2762	2.69091	2.23107	-0.0627687	0.03627	0.196081	0.468792	0.930185	0.584274	0.395586
NM_009932	Col4a2	Bivalent	0.350723	0.314165	0.698124	0.499464	0.333043	0.259725	0.548221	1.63592	-0.15881	0.993151	0.510049	-0.0746236	-0.433347	0.644426	2.2217	-0.036558	0.347401	0.148741	-0.01768	-0.090998	0.197498	1.2852
NM_029879	Rgs7bp	Bivalent	0.0487112	0.0502299	0.0417139	0.0185107	0.0263242	0.0481306	0.174794	0.226774	0.0442929	-0.223725	-1.39589	-0.887864	-0.0172991	1.84333	2.21893	0.0015187	-0.0069973	-0.0302005	-0.022387	-0.0005806	0.126083	0.178063
NM_001081376	Chd5	Bivalent	0.210122	0.223858	0.124318	0.572465	0.792737	1.33908	1.30241	0.971846	0.0913567	-0.757192	1.44596	1.91562	2.67194	2.63188	2.2095	0.013736	-0.085804	0.362343	0.582615	1.12896	1.09229	0.761724
NM_029361	Wnk2	Bivalent	0.0951137	0.0213698	0.0662123	0.0544504	0.108769	0.0818504	0.28895	0.437039	-2.15408	-0.522554	-0.804711	0.193542	-0.216664	1.60309	2.20004	-0.0737439	-0.0289014	-0.0406633	0.0136553	-0.0132633	0.193836	0.341925
NM_009946	Cplx2	Bivalent	0.0978451	0.135621	0.0312191	0.0302054	0.00594139	0.0108474	0.107646	0.449082	0.471009	-1.64807	-1.69569	-4.04163	-3.17315	0.137723	2.19841	0.0377759	-0.066626	-0.0676397	-0.0919037	-0.0869977	0.0098009	0.351237
NM_008471	Krt19	Bivalent	0.443627	0.167775	1.47249	0.536403	0.241016	0.402595	0.778111	1.99709	-1.40282	1.73084	0.27397	-0.880218	-0.140018	0.810629	2.17048	-0.275852	1.02886	0.092776	-0.202611	-0.041032	0.334484	1.55346
NM_010345	Grb10	Bivalent	18.5652	17.9212	22.4445	16.6224	22.3248	19.3736	49.9203	82.8298	-0.0509336	0.273761	-0.159472	0.266046	0.0614912	1.42703	2.15755	-0.644	3.8793	-1.9428	3.7596	0.8084	31.3551	64.2646
NM_011808	Ets1	Bivalent	0.251744	0.191149	0.3295	0.0732402	0.218506	0.298739	0.638408	1.12291	-0.39726	0.388321	-1.78125	-0.204284	0.246928	1.34252	2.15721	-0.060595	0.077756	-0.178504	-0.033238	0.046995	0.386664	0.871166
NM_175386	Lhfp	Bivalent	0.20238	0.40727	0.957209	0.428209	0.439535	0.0804427	0.0986086	0.895674	1.00892	2.24177	1.08125	1.11891	-1.33103	-1.03728	2.14591	0.20489	0.754829	0.225829	0.237155	-0.121937	-0.103771	0.693294
NM_009144	Sfrp2	Bivalent	4.27536	4.22671	4.03086	5.35922	7.02061	9.17946	16.5631	18.8018	-0.0165108	-0.0849582	0.325977	0.71555	1.10236	1.95385	2.13675	-0.04865	-0.2445	1.08386	2.74525	4.9041	12.2877	14.5264
NM_026376	Plxnd1	Bivalent	0.180475	0.205571	0.186039	0.114817	0.162728	0.173243	0.640671	0.787488	0.187838	0.0438061	-0.652463	-0.149336	-0.0590019	1.82778	2.12546	0.025096	0.005564	-0.065658	-0.017747	-0.007232	0.460196	0.607013
NM_016696	Gpc1	Bivalent	3.12914	2.51617	1.6578	2.46839	3.39204	3.36548	8.65447	13.5119	-0.314537	-0.916496	-0.342196	0.116387	0.105046	1.46768	2.11039	-0.61297	-1.47134	-0.66075	0.2629	0.23634	5.52533	10.3828
NM_023320	Plekho1	Bivalent	0.835025	0.799452	0.86256	0.865528	1.04092	1.25042	2.28973	3.55428	-0.062808	0.0468054	0.0517611	0.317968	0.582521	1.45529	2.08967	-0.035573	0.027535	0.030503	0.205895	0.415395	1.45471	2.71925
NM_001024136	Anks6	Bivalent	0.129556	0.144728	0.0824942	0.0286749	0.0166132	0.0909912	0.312012	0.547527	0.159768	-0.651211	-2.17572	-2.96317	-0.509777	1.26803	2.07935	0.015172	-0.0470618	-0.100881	-0.112943	-0.0385648	0.182456	0.417971
NM_153776	Tmem121	Bivalent	1.15039	0.792983	1.37376	1.75277	2.81156	4.55048	7.71204	4.81528	-0.536761	0.256007	0.607514	1.28925	1.9839	2.74499	2.0655	-0.357407	0.22337	0.60238	1.66117	3.40009	6.56165	3.66489
NM_031163	Col2a1	Bivalent	0.152847	0	0.131034	0.137834	0.779525	0.680992	0.793999	0.638466	-10	-0.222147	-0.149156	2.35051	2.15555	2.37705	2.06252	-0.152847	-0.021813	-0.015013	0.626678	0.528145	0.641152	0.485619
NM_001100460	Zbtb42	Bivalent	0.118591	0.211828	0.13422	0.144144	0.0937061	0.152417	0.146468	0.492565	0.836899	0.178605	0.281516	-0.33978	0.362029	0.304591	2.05432	0.093237	0.015629	0.025553	-0.0248849	0.033826	0.027877	0.373974
NM_198411	Inf2	Bivalent	0.400902	0.117955	0.22244	0.258233	0.635681	1.46309	1.35796	1.65893	-1.76501	-0.849833	-0.634576	0.665053	1.8677	1.76012	2.04893	-0.282947	-0.178462	-0.142669	0.234779	1.06219	0.957058	1.25803
NM_010729	Loxl1	Bivalent	0.24192	0.280656	0.137503	0.170082	0.271094	0.298024	0.758962	0.996813	0.214273	-0.815067	-0.5083	0.164263	0.300898	1.6495	2.04279	0.038736	-0.104417	-0.071838	0.029174	0.056104	0.517042	0.754893
NM_001033525	Kcnk6	Bivalent	0.346327	0.39738	0.36484	0.285264	0.373186	0.684333	1.20806	1.42286	0.198384	0.075129	-0.279837	0.10776	0.982564	1.80249	2.03859	0.051053	0.018513	-0.061063	0.026859	0.338006	0.861733	1.07653
NM_011522	Syngr3	Bivalent	0.594672	0.312137	0.180262	0.508959	0.607502	1.19041	2.05266	2.36362	-0.929915	-1.722	-0.224545	0.030795	1.00129	1.78733	1.99083	-0.282535	-0.41441	-0.085713	0.01283	0.595738	1.45799	1.76895
NM_011889	44077	Bivalent	0.834289	0.622917	0.266123	0.587787	1.1427	1.28425	3.30092	3.30939	-0.421507	-1.64845	-0.505254	0.453828	0.622307	1.98425	1.98795	-0.211372	-0.568166	-0.246502	0.308411	0.449961	2.46663	2.4751
NM_009142	Cx3cl1	Bivalent	0.169143	0.281836	0.451723	0.200935	0.128662	1.19988	1.09253	0.667368	0.736612	1.41719	0.248485	-0.394657	2.82657	2.69136	1.98024	0.112693	0.28258	0.031792	-0.040481	1.03074	0.923387	0.498225
NM_009655	Alcam	Bivalent	0.160848	0.194995	0.46199	0.0829582	0.0816906	0.668418	0.633002	0.630812	0.277739	1.52216	-0.955242	-0.977456	2.05505	1.97651	1.97151	0.034147	0.301142	-0.0778898	-0.0791574	0.50757	0.472154	0.469964
NM_133710	Ctdspl	Bivalent	0.241607	0.225431	0.145644	0.252172	0.169848	0.258921	0.537925	0.91362	-0.0999763	-0.730216	0.0617458	-0.508418	0.0998497	1.15474	1.91893	-0.016176	-0.095963	0.010565	-0.071759	0.017314	0.296318	0.672013
NM_010588	Jag2	Bivalent	1.41905	0.923279	0.667124	1.26875	1.88376	1.20601	4.46568	5.3512	-0.620087	-1.0889	-0.161518	0.40869	-0.234684	1.65395	1.91494	-0.495771	-0.751926	-0.1503	0.46471	-0.21304	3.04663	3.93215
NM_013683	Tap1	Bivalent	1.07366	0.718061	0.434066	1.01373	1.62459	2.23505	4.14829	4.042	-0.580359	-1.30655	-0.0828638	0.597538	1.05777	1.94998	1.91253	-0.355599	-0.639594	-0.05993	0.55093	1.16139	3.07463	2.96834
NM_001081279	Mfhas1	Bivalent	0.469507	0.523944	0.345036	0.111941	0.126309	0.195604	0.555782	1.75116	0.158266	-0.4444	-2.06841	-1.89419	-1.26321	0.243372	1.89909	0.054437	-0.124471	-0.357566	-0.343198	-0.273903	0.086275	1.28165
NM_008449	Kif5c	Bivalent	2.52178	3.01016	3.41044	2.98523	2.29847	3.20019	5.76658	9.21553	0.255398	0.435515	0.2434	-0.133769	0.343715	1.19327	1.86962	0.48838	0.88866	0.46345	-0.22331	0.67841	3.2448	6.69375
NM_144852	Slc7a4	Bivalent	0.195912	0.187116	0.196523	0.0584272	0.0578778	0.10217	0.505903	0.71282	-0.0662728	0.0044924	-1.74549	-1.75912	-0.939234	1.36866	1.86333	-0.008796	0.000611	-0.137485	-0.138034	-0.093742	0.309991	0.516908
NM_145920	Evc2	Bivalent	0.916736	0.790817	0.711898	0.67156	1.08837	1.15812	2.36949	3.30887	-0.213162	-0.364836	-0.44899	0.247591	0.337207	1.37	1.85176	-0.125919	-0.204838	-0.245176	0.171634	0.241384	1.45275	2.39213
NM_008609	Mmp15	Bivalent	0.682321	0.78755	1.0329	0.864365	0.734864	0.448773	1.5498	2.46074	0.206921	0.598178	0.34119	0.107027	-0.604465	1.18356	1.85057	0.105229	0.350579	0.182044	0.052543	-0.233548	0.867479	1.77842
NM_001159900	Hopx	Bivalent	1.01556	0.457374	2.67297	5.43038	12.6929	11.7894	8.85145	3.50656	-1.15083	1.39617	2.41878	3.64367	3.53714	3.12364	1.78778	-0.558186	1.65741	4.41482	11.6773	10.7738	7.83589	2.491
NM_009883	Cebpb	Bivalent	0.807777	0.492877	0.154509	0.133619	0.186382	0.495419	3.19529	2.75976	-0.712729	-2.38627	-2.59583	-2.11569	-0.705308	1.98392	1.77251	-0.3149	-0.653268	-0.674158	-0.621395	-0.312358	2.38751	1.95198
NM_013724	Nrk	Bivalent	0.186561	0.173806	0.752529	0.677055	0.278396	0.14731	0.233335	0.628011	-0.10217	2.0121	1.85963	0.577491	-0.340792	0.322755	1.75114	-0.012755	0.565968	0.490494	0.091835	-0.039251	0.046774	0.44145
NM_178386	Slc25a31	Bivalent	0.521272	0.668475	2.02608	1.64411	1.90983	3.89251	4.56213	1.74615	0.358837	1.95858	1.6572	1.87334	2.90059	3.1296	1.74407	0.147203	1.50481	1.12284	1.38856	3.37124	4.04086	1.22488
NM_178928	Afap1l1	Bivalent	0.309714	0.292743	1.28008	0.405224	0.190883	0.155945	0.317053	1.0338	-0.0813019	2.04723	0.387783	-0.698248	-0.989899	0.0337874	1.73895	-0.016971	0.970366	0.09551	-0.118831	-0.153769	0.007339	0.724086
NR_003258	Gnas	Bivalent	28.6804	24.3752	23.0315	24.4991	34.7922	31.5594	53.4074	95.2619	-0.234651	-0.316457	-0.227336	0.278699	0.138005	0.896975	1.73183	-4.3052	-5.6489	-4.1813	6.1118	2.879	24.727	66.5815
NM_011950	Mapk13	Bivalent	3.63747	3.25315	1.88989	1.21303	1.77697	1.21676	5.94643	12.0667	-0.161098	-0.944633	-1.58432	-1.03352	-1.57989	0.709088	1.73002	-0.38432	-1.74758	-2.42444	-1.8605	-2.42071	2.30896	8.42923
NM_172863	Zfp697	Bivalent	0.223442	0.126199	0.171531	0.0841996	0.0732253	0.145927	0.368904	0.738687	-0.8242	-0.381431	-1.40802	-1.60949	-0.614654	0.723345	1.72506	-0.097243	-0.051911	-0.139242	-0.150217	-0.077515	0.145462	0.515245
NM_021292	Evc	Bivalent	0.648019	0.398849	0.211447	0.379576	1.50913	1.59272	2.66648	2.1241	-0.700193	-1.61574	-0.771647	1.21961	1.29738	2.04083	1.71274	-0.24917	-0.436572	-0.268443	0.861111	0.944701	2.01846	1.47608
NM_029182	Rasd2	Bivalent	0.715461	0.646508	0.424111	0.483045	1.44648	2.04476	2.76698	2.3369	-0.146205	-0.754431	-0.566716	1.0156	1.51499	1.95137	1.70765	-0.068953	-0.29135	-0.232416	0.731019	1.3293	2.05152	1.62144
NM_001033380	Itpripl2	Bivalent	0.217591	0.197436	0.259435	0.166303	0.349559	0.339604	0.640577	0.708643	-0.140234	0.253754	-0.387805	0.683917	0.642235	1.55775	1.70344	-0.020155	0.041844	-0.051288	0.131968	0.122013	0.422986	0.491052
NM_030595	Nbea	Bivalent	1.11842	1.18496	1.26177	1.0291	1.52828	2.21973	2.47682	3.51782	0.0833763	0.173987	-0.120079	0.450447	0.988922	1.14703	1.65322	0.06654	0.14335	-0.08932	0.40986	1.10131	1.3584	2.3994
NM_020606	Parva	Bivalent	1.23881	2.34379	1.7097	1.02293	0.336639	0.124203	0.512685	3.62385	0.919888	0.464788	-0.276248	-1.87968	-3.31818	-1.27281	1.54857	1.10498	0.47089	-0.21588	-0.902171	-1.11461	-0.726125	2.38504
NM_172443	Tbc1d16	Bivalent	2.39957	1.42149	0.434342	0.285025	0.703751	1.99644	3.20839	6.37656	-0.755372	-2.46587	-3.07362	-1.76964	-0.265346	0.419074	1.41	-0.97808	-1.96523	-2.11455	-1.69582	-0.40313	0.80882	3.97699
NM_009255	Serpine2	Bivalent	5.30446	2.72986	3.20257	3.77569	9.52711	6.71028	8.45653	13.9637	-0.958379	-0.727976	-0.490466	0.844833	0.339167	0.67286	1.3964	-2.5746	-2.10189	-1.52877	4.22265	1.40582	3.15207	8.65924
NM_153508	Clstn3	Bivalent	1.70299	0.967434	1.2586	2.53466	4.80116	6.17973	5.25364	4.40621	-0.815835	-0.43625	0.573722	1.49531	1.85947	1.62525	1.37147	-0.735556	-0.44439	0.83167	3.09817	4.47674	3.55065	2.70322
NM_008968	Ptgis	Bivalent	4.52556	2.30021	2.55014	2.93182	6.69749	8.4856	13.7221	11.618	-0.976331	-0.82752	-0.6263	0.565524	0.90692	1.60033	1.36019	-2.22535	-1.97542	-1.59374	2.17193	3.96004	9.19654	7.09244
NM_009922	Cnn1	H3K27me3-only	0.00958424	0.0396376	0.0190257	0.00541911	0.230414	0.605731	2.53992	11.7492	2.04813	0.989214	-0.822608	4.58742	5.98187	8.0499	10.2596	0.0300534	0.00944146	-0.00416513	0.22083	0.596147	2.53034	11.7396
NM_177260	Tmem154	H3K27me3-only	0.0176857	0.00628077	0.0193555	0.0845721	0.889299	0.799873	1.8737	7.32159	-1.49357	0.13016	2.2576	5.65201	5.49912	6.72716	8.69343	-0.0114049	0.0016698	0.0668864	0.871613	0.782187	1.85601	7.3039
NM_028176	Cda	H3K27me3-only	0.0123196	0.0159655	0.0133785	0	0.0585373	0.131762	1.28384	3.24931	0.374002	0.118961	-10	2.2484	3.41891	6.70337	8.04303	0.0036459	0.0010589	-0.0123196	0.0462177	0.119442	1.27152	3.23699
NM_025572	2610528J11Rik	H3K27me3-only	0.0820056	0.149109	0.266557	0.126894	1.79179	11.1297	10.6272	13.6687	0.862573	1.70065	0.62983	4.44954	7.08448	7.01782	7.38094	0.0671034	0.184551	0.0448884	1.70978	11.0477	10.5452	13.5867
NM_182991	Tmem59l	H3K27me3-only	0.0862784	0.100987	0.0796442	0.108719	0.611443	3.99099	6.16246	13.8643	0.227098	-0.11543	0.333533	2.82515	5.5316	6.15836	7.32816	0.0147086	-0.0066342	0.0224406	0.525165	3.90471	6.07618	13.778
NM_177049	Jph4	H3K27me3-only	0.0180492	0.0255725	0.0707193	0.393349	0.740412	3.35414	4.06623	2.51325	0.502658	1.97017	4.4458	5.35832	7.53786	7.81561	7.12148	0.0075233	0.0526701	0.3753	0.722363	3.33609	4.04818	2.4952
NM_026433	Tmem100	H3K27me3-only	0.0100103	0.0569174	0.00538356	0.0351695	0.180836	0.751299	1.33412	1.0351	2.50738	-0.894853	1.81284	4.17512	6.22983	7.05826	6.69214	0.0469071	-0.00462674	0.0251592	0.170826	0.741289	1.32411	1.02509
NM_026135	Kctd16	H3K27me3-only	0.0290441	0.0683857	0.970732	0.341134	0.302732	0.31317	1.4398	2.47577	1.23545	5.06276	3.55402	3.38172	3.43063	5.63148	6.41349	0.0393416	0.941688	0.31209	0.273688	0.284126	1.41076	2.44673
NM_007662	Cdh15	H3K27me3-only	0.00299565	0.0228163	0.0225879	0.0214892	0.1257	0.286604	0.326498	0.251272	2.92912	2.91461	2.84267	5.39097	6.58005	6.76806	6.39024	0.0198207	0.0195923	0.0184936	0.122704	0.283608	0.323502	0.248276
NM_010856	Myh6	H3K27me3-only	0.0181923	0.0416426	0.0850737	0.187299	0.3316	0.633475	1.85131	1.50667	1.19473	2.22539	3.36394	4.18804	5.12189	6.66907	6.37189	0.0234503	0.0668814	0.169107	0.313408	0.615283	1.83312	1.48848
NM_001018013	Izumo1	H3K27me3-only	0.00711072	0.0233903	0.00648294	0.0209159	0.0212621	0.0410747	0.157315	0.491266	1.71784	-0.133347	1.55653	1.58022	2.53018	4.46752	6.11036	0.0162796	-0.00062778	0.0138052	0.0141514	0.033964	0.150204	0.484155
NM_148940	Prss44	H3K27me3-only	0.00564911	0.00619742	0.0105664	0.101583	0.382589	0.938854	0.909335	0.35435	0.133644	0.903388	4.16849	6.08163	7.37673	7.33064	5.97101	0.00054831	0.00491729	0.0959339	0.37694	0.933205	0.903686	0.348701
NM_010661	Krt12	H3K27me3-only	0.0103357	0.0482023	0.0464159	0.0559819	0.0276304	0.317405	0.772662	0.51613	2.22147	2.16698	2.43732	1.41862	4.94062	6.22413	5.64203	0.0378666	0.0360802	0.0456462	0.0172947	0.307069	0.762326	0.505794
NM_173428	Sspo	H3K27me3-only	0.00506726	0.00937026	0.00111586	0.00986809	0.0876875	0.24193	0.164441	0.247281	0.886883	-2.18305	0.961565	4.11309	5.57724	5.02022	5.6088	0.004303	-0.0039514	0.00480083	0.0826202	0.236863	0.159374	0.242214
NM_009394	Tnnc2	H3K27me3-only	0.0328142	0.172438	0.0329747	0.0532812	0.0533995	0.0975343	0.414969	1.54306	2.39369	0.00703927	0.699306	0.702506	1.57159	3.66061	5.55533	0.139624	0.0001605	0.020467	0.0205853	0.0647201	0.382155	1.51025
NM_139206	Arap3	H3K27me3-only	0.0170147	7.49971e-05	0.0984126	0.0679566	0.100756	0.268738	0.60088	0.707037	-7.82573	2.53206	1.99783	2.56601	3.98135	5.14222	5.37693	-0.0169397	0.0813979	0.0509419	0.0837413	0.251723	0.583865	0.690022
NM_001159507	Grip2	H3K27me3-only	0.0230035	0.0287424	0.00534138	0.0612869	0.114783	0.0901556	0.332586	0.688702	0.321327	-2.10657	1.41373	2.31898	1.97056	3.8538	4.90395	0.0057389	-0.0176621	0.0382834	0.0917795	0.0671521	0.309582	0.665699
NM_177841	4932418E24Rik	H3K27me3-only	0.00903889	0	0.0117943	0.0159903	0.340821	0.393704	0.312447	0.259997	-10	0.383872	0.822979	5.23672	5.44482	5.11132	4.84621	-0.00903889	0.00275541	0.00695141	0.331782	0.384665	0.303408	0.250958
NM_001271981	Fut1	H3K27me3-only	0.031688	0.00455855	0	0	0.104122	0.00741919	0.60046	0.890026	-2.79729	-10	-10	1.71627	-2.0946	4.24406	4.81184	-0.0271294	-0.031688	-0.031688	0.072434	-0.0242688	0.568772	0.858338
NM_145978	Pdlim2	H3K27me3-only	0.0506303	0.0751297	0.5999	0.555615	0.572491	0.504926	1.62793	1.36134	0.569382	3.56665	3.45601	3.49918	3.318	5.00689	4.74888	0.0244994	0.54927	0.504985	0.521861	0.454296	1.5773	1.31071
NM_007378	Abca4	H3K27me3-only	0.0188492	0.030246	0.167769	0.198793	0.16285	0.342022	0.539862	0.476029	0.682241	3.1539	3.39869	3.11097	4.18151	4.84002	4.65847	0.0113968	0.14892	0.179944	0.144001	0.323173	0.521013	0.45718
NM_007925	Eln	H3K27me3-only	0.0118982	0.0083931	0.00237985	0.0109349	0.0362361	0.0650392	0.150159	0.272826	-0.503468	-2.3218	-0.121803	1.60668	2.45057	3.65768	4.51917	-0.0035051	-0.00951835	-0.0009633	0.0243379	0.053141	0.138261	0.260928
NM_198408	Crhbp	H3K27me3-only	0.0220645	0.0339293	0.0173341	0.0191339	0.00607036	0.0360026	0.909214	0.504167	0.620805	-0.348114	-0.205596	-1.86187	0.706374	5.36482	4.5141	0.0118648	-0.0047304	-0.0029306	-0.0159941	0.0139381	0.887149	0.482103
NM_172449	Bzrap1	H3K27me3-only	0.0311368	0.0535496	0.0117596	0.0474572	0.109781	0.328185	0.546777	0.70126	0.782255	-1.40478	0.608006	1.81794	3.39782	4.13426	4.49326	0.0224128	-0.0193772	0.0163204	0.0786442	0.297048	0.51564	0.670123
NM_001167860	Wipf3	H3K27me3-only	0.102212	0.065686	0.101651	0.21121	0.284882	0.451882	1.27766	2.251	-0.637907	-0.00794018	1.04711	1.4788	2.14438	3.64387	4.46093	-0.036526	-0.000561	0.108998	0.18267	0.34967	1.17545	2.14879
NM_172731	Fgd5	H3K27me3-only	0.171788	0.173935	0.0800777	0.138704	0.758225	1.52549	2.90904	3.47515	0.017919	-1.10116	-0.30862	2.142	3.15057	4.08184	4.33837	0.002147	-0.0917103	-0.033084	0.586437	1.3537	2.73725	3.30336
NM_001122603	Fcgbp	H3K27me3-only	0.0232237	0.0327274	0.0284481	0.0221332	0.0738165	0.0390581	0.236932	0.423777	0.494901	0.292734	-0.0693858	1.66835	0.750024	3.3508	4.18964	0.0095037	0.0052244	-0.0010905	0.0505928	0.0158344	0.213708	0.400553
NR_033498	AI504432	H3K27me3-only	0.0217175	0.0394997	0.0340757	0.0105046	0.160188	0.444477	0.402991	0.381583	0.862984	0.649885	-1.04784	2.88284	4.35518	4.21382	4.13507	0.0177822	0.0123582	-0.0112129	0.13847	0.42276	0.381273	0.359866
NM_028386	Asphd2	H3K27me3-only	0.188203	0.320727	0.251536	0.132936	0.190216	0.701079	2.55505	2.94203	0.769056	0.418475	-0.501558	0.015349	1.89729	3.76299	3.96645	0.132524	0.063333	-0.055267	0.002013	0.512876	2.36685	2.75383
NM_001177794	Sertad4	H3K27me3-only	0.18386	0.284872	0.188227	0.247446	0.893164	2.68167	2.32036	2.52186	0.631706	0.0338659	0.428506	2.28032	3.86645	3.65767	3.77781	0.101012	0.004367	0.063586	0.709304	2.49781	2.1365	2.338
NM_133190	Cacng8	H3K27me3-only	0.0982018	0.0829303	0.284322	0.546356	0.652981	3.38905	2.86563	1.32207	-0.24385	1.5337	2.47602	2.73322	5.10899	4.86696	3.75091	-0.0152715	0.18612	0.448154	0.554779	3.29085	2.76743	1.22387
NM_178591	Nrg1	H3K27me3-only	0.0458085	0.110199	0.410143	0.340939	0.313657	0.196061	0.516361	0.594847	1.26642	3.16244	2.89583	2.7755	2.09762	3.49469	3.69883	0.0643905	0.364335	0.29513	0.267849	0.150253	0.470552	0.549038
NM_032398	Plvap	H3K27me3-only	0.0676031	0.0379652	0.169945	0.154282	0.11565	0.259685	0.688458	0.766518	-0.832412	1.32991	1.19041	0.774604	1.9416	3.34821	3.50316	-0.0296379	0.102342	0.0866789	0.0480469	0.192082	0.620855	0.698915
NM_001081169	Aspg	H3K27me3-only	0.246545	0.222626	0.0853457	0.0849083	0.168203	0.315305	1.35594	2.65254	-0.147229	-1.53046	-1.53787	-0.551648	0.354897	2.45937	3.42745	-0.023919	-0.161199	-0.161637	-0.078342	0.06876	1.10939	2.406
NM_001113360	Plch2	H3K27me3-only	0.0477906	0.115573	0.0124811	0.0620651	0.164248	0.106667	0.400463	0.489647	1.27401	-1.93698	0.377055	1.78108	1.15832	3.06687	3.35694	0.0677824	-0.0353095	0.0142745	0.116457	0.0588764	0.352672	0.441856
NM_001206851	Usp44	H3K27me3-only	1.77621	1.37718	1.37528	3.0145	8.32858	13.3487	15.4974	17.8085	-0.367085	-0.369077	0.763117	2.22927	2.90983	3.12515	3.32569	-0.39903	-0.40093	1.23829	6.55237	11.5725	13.7212	16.0323
NM_001081387	Ctcfl	H3K27me3-only	0.049891	0.106382	0.216467	0.431581	0.607182	1.711	1.31071	0.386511	1.0924	2.1173	3.11278	3.60528	5.09992	4.71543	2.95366	0.056491	0.166576	0.38169	0.557291	1.66111	1.26082	0.33662
NM_021478	Tulp1	H3K27me3-only	0.346318	0.242363	0.150727	0.238743	0.57423	0.643793	1.0166	2.14371	-0.514928	-1.20016	-0.536639	0.729531	0.8945	1.55358	2.62994	-0.103955	-0.195591	-0.107575	0.227912	0.297475	0.670282	1.79739
NM_013783	Mmel1	H3K27me3-only	0.156667	0.0661304	0.0629852	0.0591404	0.230086	0.485209	0.830973	0.967539	-1.24432	-1.31462	-1.40549	0.554472	1.6309	2.4071	2.62662	-0.0905366	-0.0936818	-0.0975266	0.073419	0.328542	0.674306	0.810872
NM_007405	Adcy6	H3K27me3-only	0.314167	0.182898	0.145599	0.17752	0.219511	0.533137	0.794698	1.8216	-0.780492	-1.10953	-0.82355	-0.517238	0.762975	1.33888	2.5356	-0.131269	-0.168568	-0.136647	-0.094656	0.21897	0.480531	1.50743
NM_027289	Nt5dc2	H3K27me3-only	20.2471	15.8789	10.765	17.0121	45.1215	84.0857	154.51	116.68	-0.350604	-0.911367	-0.251154	1.1561	2.05415	2.93191	2.52677	-4.3682	-9.4821	-3.235	24.8744	63.8386	134.263	96.4329
NM_016685	Comp	H3K27me3-only	0.0647428	0.0672797	0.0616539	0.0459907	0.0411877	0.0621462	0.151664	0.370014	0.0554515	-0.0705276	-0.493378	-0.652506	-0.0590536	1.22809	2.51479	0.0025369	-0.0030889	-0.0187521	-0.0235551	-0.0025966	0.0869212	0.305271
NM_144847	Nrbp2	H3K27me3-only	0.367747	0.153314	0.0485197	0.0483531	0.0971241	0.0795648	0.512853	1.73214	-1.26222	-2.92207	-2.92703	-1.92081	-2.20851	0.479832	2.23577	-0.214433	-0.319227	-0.319394	-0.270623	-0.288182	0.145106	1.36439
NM_174848	Crybg3	H3K27me3-only	0.654106	0.740645	2.70605	2.78997	2.46267	2.00359	1.31394	3.05622	0.179258	2.04859	2.09265	1.91263	1.61499	1.0063	2.22415	0.086539	2.05194	2.13586	1.80856	1.34948	0.659834	2.40211
NM_031260	Mov10l1	H3K27me3-only	0.600341	0.510037	0.712661	0.745801	0.639096	1.50589	1.91478	2.01422	-0.23518	0.247434	0.313009	0.0902505	1.32676	1.67332	1.74637	-0.090304	0.11232	0.14546	0.038755	0.905549	1.31444	1.41388
NM_175367	Ston2	H3K27me3-only	1.63287	2.71455	2.89815	3.82446	4.87821	4.12051	5.25648	4.52744	0.733303	0.827722	1.22785	1.57894	1.33541	1.68669	1.47129	1.08168	1.26528	2.19159	3.24534	2.48764	3.62361	2.89457
NM_172118	Myl9	H3K4me3-only	0.0205358	0.0997932	0.0953127	0.250674	1.35977	6.61922	17.4643	67.8621	2.2808	2.21453	3.6096	6.04908	8.33238	9.73205	11.6902	0.0792574	0.0747769	0.230138	1.33923	6.59868	17.4438	67.8416
NM_134160	Mcoln3	H3K4me3-only	0.0122152	0.0133986	0.0171348	0.0191393	0.0299522	0.0855096	0.7425	5.51978	0.133405	0.488252	0.647861	1.29398	2.80741	5.92564	8.81979	0.0011834	0.0049196	0.0069241	0.017737	0.0732944	0.730285	5.50756
NM_018744	Sema6a	H3K4me3-only	0.0348163	0.0741766	0.0621957	0.0481329	0.491142	3.40643	3.25925	13.3156	1.0912	0.837052	0.46726	3.81831	6.61235	6.54863	8.57914	0.0393603	0.0273794	0.0133166	0.456326	3.37161	3.22443	13.2808
NM_001033339	Mmp25	H3K4me3-only	0.0733887	0.101472	0.396709	1.23453	4.22672	12.1168	15.8622	20.7508	0.467452	2.43445	4.07226	5.84784	7.36724	7.75582	8.14339	0.0280833	0.32332	1.16114	4.15333	12.0434	15.7888	20.6774
NM_029861	Cnrip1	H3K4me3-only	0.0068736	0.014807	0.025547	0.0274022	0.0475593	0.159356	0.380636	1.66742	1.10714	1.89402	1.99515	2.79059	4.53504	5.7912	7.92234	0.0079334	0.0186734	0.0205286	0.0406857	0.152482	0.373762	1.66055
NM_001011874	Xkr4	H3K4me3-only	0.00545794	0.0178608	0.0252433	0.00268417	0.0296986	0.105503	0.235627	1.00017	1.71037	2.20947	-1.02388	2.44397	4.27278	5.432	7.51767	0.0124029	0.0197854	-0.00277377	0.0242407	0.100045	0.230169	0.994712
NM_130448	Pcdh18	H3K4me3-only	0.00349927	0.0142133	0.0191776	0.0382832	0.13792	0.419737	0.621869	0.562684	2.02212	2.4543	3.45159	5.30063	6.90629	7.47341	7.32913	0.010714	0.0156783	0.0347839	0.134421	0.416238	0.61837	0.559185
NM_001159389	Rfx6	H3K4me3-only	0.00287545	0	0.0158373	0.0229725	0.0595245	0.0773282	0.162416	0.446407	-10	2.46147	2.99805	4.37162	4.74913	5.81976	7.27843	-0.00287545	0.0129618	0.020097	0.056649	0.0744527	0.159541	0.443532
NM_001012477	Cxcl12	H3K4me3-only	0.0091375	0	0	0.0154082	0.10906	0.942188	1.24534	1.28891	-10	-10	0.753827	3.57718	6.68807	7.09052	7.14014	-0.0091375	-0.0091375	0.0062707	0.0999225	0.933051	1.2362	1.27977
NM_013655	Cxcl12	H3K4me3-only	0.0305772	0.0100889	0.00572206	0.00335476	0.351758	1.48748	3.13134	4.21922	-1.59969	-2.41785	-3.18817	3.52406	5.60427	6.67818	7.10838	-0.0204883	-0.0248551	-0.0272224	0.321181	1.4569	3.10076	4.18864
NM_026778	Cthrc1	H3K4me3-only	0.112519	0.193135	0.218339	0.403064	2.83162	14.6198	13.8904	13.9291	0.779441	0.956401	1.84084	4.65339	7.02161	6.94778	6.95179	0.080616	0.10582	0.290545	2.7191	14.5073	13.7779	13.8166
NM_001024614	1700007G11Rik	H3K4me3-only	0.0228231	0.0143806	0.0631313	0.0687822	0.427069	1.17115	2.73587	2.72967	-0.666371	1.46786	1.59154	4.2259	5.68129	6.90536	6.90209	-0.0084425	0.0403082	0.0459591	0.404246	1.14833	2.71305	2.70685
NM_023580	Epha1	H3K4me3-only	0.237953	0.238762	1.47994	1.05231	2.24535	10.0114	12.9362	26.6563	0.0048966	2.63679	2.14481	3.23819	5.39482	5.76459	6.80766	0.000809	1.24199	0.814357	2.0074	9.77345	12.6982	26.4183
NM_008216	Has2	H3K4me3-only	0.0674472	0.0173268	0.0129081	0.0757425	0.412337	1.41411	4.0908	7.08462	-1.96075	-2.38548	0.167344	2.61199	4.38999	5.92248	6.71479	-0.0501204	-0.0545391	0.0082953	0.34489	1.34666	4.02335	7.01717
NM_172854	Olfml2a	H3K4me3-only	0.00843024	0.0137009	0.00788602	0.0292508	0.0704032	0.061012	0.186665	0.764529	0.700625	-0.0962763	1.79483	3.062	2.85545	4.46873	6.50285	0.00527066	-0.00054422	0.0208206	0.061973	0.0525818	0.178235	0.756099
NM_145548	Cyp2j13	H3K4me3-only	0.016633	0.0266765	0.118115	0.191087	0.71101	0.726744	0.821344	1.48857	0.681521	2.82807	3.52211	5.41775	5.44933	5.62587	6.48373	0.0100435	0.101482	0.174454	0.694377	0.710111	0.804711	1.47194
NM_013657	Sema3c	H3K4me3-only	0.0909448	0.162829	0.142597	0.129084	0.27088	1.21387	2.2746	8.13815	0.840295	0.648881	0.505247	1.57459	3.73848	4.64448	6.48357	0.0718842	0.0516522	0.0381392	0.179935	1.12293	2.18366	8.04721
NM_001253754	Gpm6a	H3K4me3-only	0.0101348	0	0.00316006	0.0404333	0.285074	0.639871	0.600666	0.891947	-10	-1.68129	1.99623	4.81395	5.98039	5.88917	6.45957	-0.0101348	-0.00697474	0.0302985	0.274939	0.629736	0.590531	0.881812
NM_010288	Gja1	H3K4me3-only	1.35567	4.03298	15.1903	20.6034	38.9385	52.8258	49.7062	114.949	1.57284	3.48607	3.9258	4.84412	5.28416	5.19635	6.40584	2.67731	13.8346	19.2477	37.5828	51.4701	48.3505	113.593
NM_152923	Kcnq3	H3K4me3-only	0.0257801	0.0113369	0.0127798	0.0171438	0.131627	0.253151	0.461832	2.06925	-1.18523	-1.01239	-0.588571	2.35213	3.29567	4.16304	6.32671	-0.0144432	-0.0130003	-0.0086363	0.105847	0.227371	0.436052	2.04347
NM_146007	Col6a2	H3K4me3-only	0.00265634	0.00291732	0	0	0.00777799	0	0.0827688	0.196154	0.135204	-10	-10	1.54996	-10	4.96158	6.2064	0.00026098	-0.00265634	-0.00265634	0.00512165	-0.00265634	0.0801125	0.193498
NM_176933	Dusp4	H3K4me3-only	0.387368	7.29753	7.3435	6.63084	15.5722	39.967	22.7714	28.4217	4.23563	4.24469	4.09741	5.32912	6.68896	5.87737	6.19714	6.91016	6.95613	6.24347	15.1848	39.5796	22.384	28.0343
NM_001083312	Gbp7	H3K4me3-only	0.0079155	0.0187202	0.0224307	0.0209281	0.050097	0.250394	0.428084	0.579647	1.24184	1.50272	1.40269	2.66197	4.98338	5.75707	6.19435	0.0108047	0.0145152	0.0130126	0.0421815	0.242479	0.420169	0.571732
NM_011834	Aadat	H3K4me3-only	0.0198235	0.00618305	0.0218886	0.0520504	0.389589	2.70377	3.55535	1.43656	-1.68082	0.142968	1.3927	4.29667	7.09162	7.48664	6.17926	-0.0136405	0.0020651	0.0322269	0.369766	2.68395	3.53553	1.41674
NM_009513	Nrsn1	H3K4me3-only	0.0129209	0.0416956	0.00896994	0.0144261	0.0948623	0.138821	0.549174	0.916296	1.69019	-0.526536	0.158975	2.87613	3.42545	5.40948	6.14804	0.0287747	-0.00395096	0.0015052	0.0819414	0.1259	0.536253	0.903375
NM_010330	Emb	H3K4me3-only	2.44002	2.891	7.51283	26.9892	76.4585	117.912	158.253	166.638	0.244676	1.62246	3.46742	4.96971	5.59467	6.0192	6.09368	0.45098	5.07281	24.5492	74.0185	115.472	155.813	164.198
NM_146004	Mfsd6l	H3K4me3-only	0.0134437	0	0.00454224	0	0.0251177	0.0840757	0.261676	0.911142	-10	-1.56545	-10	0.901774	2.64476	4.28278	6.08267	-0.0134437	-0.00890146	-0.0134437	0.011674	0.070632	0.248232	0.897698
NM_016917	Slc40a1	H3K4me3-only	0.202094	0.202503	0.690263	0.599144	3.33357	5.99737	5.12425	13.4633	0.00291679	1.77212	1.56788	4.04397	4.89123	4.66424	6.05786	0.000409	0.488169	0.39705	3.13148	5.79528	4.92216	13.2612
NR_045054	2610307P16Rik	H3K4me3-only	0.0279807	0.0186736	0.581498	0.548899	0.756154	1.10139	0.943926	1.83896	-0.583432	4.37727	4.29404	4.75618	5.29875	5.07617	6.03831	-0.0093071	0.553517	0.520918	0.728173	1.07341	0.915945	1.81098
NM_144936	Tmem45b	H3K4me3-only	0.00669877	0.0726736	0.024897	0.0941182	0.026322	0.0296816	0.100533	0.417557	3.43946	1.894	3.81251	1.9743	2.1476	3.90763	5.96193	0.0659748	0.0181982	0.0874194	0.0196232	0.0229828	0.0938342	0.410858
NM_001145800	Igsf9	H3K4me3-only	0.210411	0.152782	1.49872	3.46579	8.86135	13.2414	14.7953	12.743	-0.461736	2.83245	4.0419	5.39624	5.9757	6.13579	5.92035	-0.057629	1.28831	3.25538	8.65094	13.031	14.5849	12.5326
NM_008792	Pcsk2	H3K4me3-only	0.0167357	0.011081	0.0398657	0.0516366	0.0574395	0.12593	0.320517	1.00626	-0.594841	1.25222	1.62547	1.77911	2.91162	4.2594	5.90993	-0.0056547	0.02313	0.0349009	0.0407038	0.109194	0.303781	0.989524
NM_031258	Chrdl1	H3K4me3-only	0.00434799	0.0123915	0.0237709	0.0242403	0.0324081	0.0562848	0.100337	0.260318	1.51093	2.45078	2.47899	2.89793	3.69432	4.52836	5.90378	0.00804351	0.0194229	0.0198923	0.0280601	0.0519368	0.095989	0.25597
NM_011582	Thbs4	H3K4me3-only	0.011992	0.00999262	0.0115811	0.0122578	0.00608193	0.10989	0.517367	0.671507	-0.263137	-0.0503	0.0316278	-0.979471	3.19592	5.43104	5.80726	-0.00199938	-0.0004109	0.0002658	-0.00591007	0.097898	0.505375	0.659515
NM_001168589	Vrtn	H3K4me3-only	0.146465	0.791735	0.291221	0.271705	8.19879	20.291	14.6073	7.71172	2.43446	0.991558	0.891485	5.80678	7.11414	6.63999	5.71842	0.64527	0.144756	0.12524	8.05233	20.1445	14.4608	7.56525
NM_027834	9130008F23Rik	H3K4me3-only	0.0182449	0.0150185	0.0606706	0.0614334	0.0648732	0.106841	0.171492	0.955026	-0.280753	1.7335	1.75153	1.83013	2.5499	3.23258	5.70997	-0.0032264	0.0424257	0.0431885	0.0466283	0.0885961	0.153247	0.936781
NM_144552	Stxbp6	H3K4me3-only	0.107313	0.167148	0.0944979	0.0934681	0.238437	0.662444	2.72683	5.53466	0.639301	-0.183471	-0.199279	1.15178	2.62597	4.66733	5.6886	0.059835	-0.0128151	-0.0138449	0.131124	0.555131	2.61952	5.42735
NM_001042725	Calcr	H3K4me3-only	0.0324371	0.0675298	0.0659122	0.115767	0.152585	0.550231	0.578832	1.63173	1.05788	1.0229	1.83551	2.2339	4.08432	4.15743	5.65261	0.0350927	0.0334751	0.0833299	0.120148	0.517794	0.546395	1.59929
NR_038026	4933412E12Rik	H3K4me3-only	0.0129551	0.0123946	0.0915299	0.0805624	0.18276	0.40582	0.597087	0.630749	-0.0638084	2.82072	2.63659	3.81836	4.96925	5.52635	5.60547	-0.0005605	0.0785748	0.0676073	0.169805	0.392865	0.584132	0.617794
NM_011777	Zyx	H3K4me3-only	0.404663	1.23348	1.85624	1.25427	2.32373	5.49599	9.0698	19.3073	1.60794	2.19759	1.63206	2.52165	3.76359	4.48628	5.57628	0.828817	1.45158	0.849607	1.91907	5.09133	8.66514	18.9026
NR_001592	H19	H3K4me3-only	0.0499438	0.0536158	0.0789753	0.0861019	0.325246	0.673627	2.11536	2.35797	0.102353	0.661096	0.785739	2.70315	3.75357	5.40445	5.5611	0.003672	0.0290315	0.0361581	0.275302	0.623683	2.06542	2.30803
NM_025829	Eif4e3	H3K4me3-only	0.0760116	0.056288	0.00743441	0.0249956	0.0359865	0.174291	0.897984	3.43317	-0.433392	-3.35393	-1.60455	-1.07876	1.19721	3.5624	5.49718	-0.0197236	-0.0685772	-0.051016	-0.0400251	0.0982794	0.821972	3.35716
NM_178675	Slc35f1	H3K4me3-only	0.0254868	0.02543	0.145375	0.119853	0.358323	0.226814	0.730738	1.14197	-0.00321878	2.51196	2.23344	3.81344	3.15369	4.84153	5.48563	-5.68e-05	0.119888	0.0943662	0.332836	0.201327	0.705251	1.11648
NM_028478	Rassf6	H3K4me3-only	0.152595	0.0799026	0.0585205	0.037224	0.540531	1.09616	3.07536	6.81161	-0.933393	-1.38269	-2.0354	1.82467	2.84468	4.33298	5.48022	-0.0726924	-0.0940745	-0.115371	0.387936	0.943565	2.92277	6.65902
NM_016798	Pdlim3	H3K4me3-only	0.420728	0.78332	0.65094	0.543152	0.448586	1.82406	4.39287	18.3942	0.896714	0.629637	0.368468	0.0924968	2.11619	3.3842	5.45022	0.362592	0.230212	0.122424	0.027858	1.40333	3.97214	17.9735
NM_001037711	Cgn	H3K4me3-only	0.103055	0.222577	0.160965	0.640108	0.867041	2.35905	3.37162	4.4691	1.11089	0.643333	2.6349	3.07269	4.51672	5.03196	5.4385	0.119522	0.05791	0.537053	0.763986	2.25599	3.26857	4.36604
NM_001146196	Scin	H3K4me3-only	0.0169998	0.0355246	0.0285972	0.0336692	0.126104	0.154285	0.225144	0.73495	1.0633	0.750356	0.985912	2.89102	3.18201	3.72726	5.43406	0.0185248	0.0115974	0.0166694	0.109104	0.137285	0.208144	0.71795
NM_053248	Slc5a5	H3K4me3-only	0.0761673	0.121857	0.148631	0.447322	1.33012	3.3334	3.27395	3.15414	0.677945	0.964491	2.55407	4.12624	5.45168	5.42572	5.37193	0.0456897	0.0724637	0.371155	1.25395	3.25723	3.19778	3.07797
NM_007495	Astn1	H3K4me3-only	0.0234682	0.030141	0.0184619	0.0573643	0.195599	0.221855	0.678564	0.969788	0.36102	-0.346156	1.28945	3.05912	3.24084	4.85371	5.36889	0.0066728	-0.0050063	0.0338961	0.172131	0.198387	0.655096	0.94632
NM_001093750	Ptchd1	H3K4me3-only	0.0376339	0.103475	0.0151733	0.0123329	0.0520841	0.220913	0.352645	1.5436	1.45918	-1.3105	-1.60952	0.46881	2.55337	3.22811	5.35812	0.0658411	-0.0224606	-0.025301	0.0144502	0.183279	0.315011	1.50597
NM_001004176	Maml3	H3K4me3-only	0.0161027	0.0287629	0.0512718	0.0447926	0.035652	0.0373213	0.0762833	0.626934	0.836907	1.67086	1.47596	1.14668	1.2127	2.24406	5.28294	0.0126602	0.0351691	0.0286899	0.0195493	0.0212186	0.0601806	0.610831
NM_144891	Gdap1l1	H3K4me3-only	0.0865954	0.0459599	0.0576258	0.0603976	0.403026	1.40843	3.09422	3.32741	-0.913915	-0.587576	-0.519799	2.21851	4.02365	5.15914	5.26397	-0.0406355	-0.0289696	-0.0261978	0.316431	1.32183	3.00762	3.24081
NM_001277268	Fgf5	H3K4me3-only	0.155732	0.0344223	0.0430695	0.0763222	1.79771	5.46412	6.21892	5.94606	-2.17765	-1.85433	-1.02889	3.52902	5.13285	5.31953	5.2548	-0.12131	-0.112663	-0.0794098	1.64198	5.30839	6.06319	5.79033
NM_019634	Tspan7	H3K4me3-only	0.500896	0.431706	0.130679	0.292431	0.758269	1.14285	8.52851	19.0138	-0.214462	-1.93848	-0.776415	0.598199	1.19005	4.08971	5.24639	-0.06919	-0.370217	-0.208465	0.257373	0.641954	8.02761	18.5129
NM_021704	Cxcl12	H3K4me3-only	0.0657954	0	0	0.00541615	0.222228	1.31513	2.24368	2.49401	-10	-10	-3.60265	1.75598	4.32107	5.09174	5.24434	-0.0657954	-0.0657954	-0.0603793	0.156433	1.24933	2.17788	2.42821
NM_177591	Igsf1	H3K4me3-only	0.0262022	0.025475	0.0407785	0.0632893	0.171315	0.127425	0.0910233	0.971634	-0.0406058	0.638121	1.27227	2.70889	2.28189	1.79655	5.21265	-0.0007272	0.0145763	0.0370871	0.145113	0.101223	0.0648211	0.945432
NM_019511	Ramp3	H3K4me3-only	0.191686	0.296315	1.94068	4.96583	7.56187	3.78594	6.21892	6.95121	0.628387	3.33975	4.69522	5.30193	4.30383	5.01985	5.18045	0.104629	1.74899	4.77414	7.37018	3.59425	6.02723	6.75952
NM_001164491	Ablim3	H3K4me3-only	0.017994	0.010167	0.0258746	0.00948227	0.00684711	0.00757175	0.124242	0.624753	-0.823622	0.524021	-0.924212	-1.39395	-1.24882	2.78757	5.1177	-0.007827	0.0078806	-0.00851173	-0.0111469	-0.0104222	0.106248	0.606759
NM_177919	Tceal5	H3K4me3-only	0.039139	0.0830035	0.389965	0.372885	0.39328	0.537842	1.17236	1.33035	1.08457	3.31667	3.25205	3.32888	3.7805	4.90466	5.08706	0.0438645	0.350826	0.333746	0.354141	0.498703	1.13322	1.29121
NM_178754	Arhgap6	H3K4me3-only	0.00692306	0.0261635	0.0231219	0.0246608	0.0624039	0.0506592	0.0617179	0.23527	1.91807	1.73978	1.83274	3.17215	2.87134	3.15621	5.08676	0.0192404	0.0161988	0.0177377	0.0554808	0.0437361	0.0547948	0.228347
NM_001081088	Lrp2	H3K4me3-only	0.634796	1.05702	4.66126	9.6581	15.7948	27.7344	15.9714	21.4876	0.735638	2.87636	3.92737	4.63701	5.44924	4.65305	5.08107	0.422224	4.02646	9.0233	15.16	27.0996	15.3366	20.8528
NM_133738	Antxr2	H3K4me3-only	0.0160748	0.0287595	0.0539931	0.01622	0.0834619	0.238456	0.331872	0.543006	0.839238	1.74797	0.012973	2.37632	3.89085	4.36775	5.0781	0.0126847	0.0379183	0.0001452	0.0673871	0.222381	0.315797	0.526931
NR_037986	Gm16880	H3K4me3-only	0.325533	0.441553	1.2359	2.6765	3.1569	2.51078	3.29616	10.4771	0.439783	1.92469	3.03947	3.27763	2.94726	3.33991	5.00829	0.11602	0.910367	2.35097	2.83137	2.18525	2.97063	10.1516
NM_007725	Cnn2	H3K4me3-only	3.32359	3.9041	3.50102	3.33469	9.3817	8.49431	16.738	104.821	0.232248	0.0750329	0.00481023	1.49711	1.35375	2.33231	4.97904	0.58051	0.17743	0.0111	6.05811	5.17072	13.4144	101.497
NM_009662	Alox5	H3K4me3-only	0.0941946	0.102597	0.0494198	0.173172	0.397131	0.451098	1.13855	2.89314	0.123272	-0.930555	0.878489	2.0759	2.25972	3.59541	4.94085	0.0084024	-0.0447748	0.0789774	0.302936	0.356903	1.04436	2.79895
NM_197988	1190005I06Rik	H3K4me3-only	1.08939	0.744578	12.6761	20.9027	21.4634	17.3676	26.3739	33.3971	-0.549026	3.54052	4.2621	4.30029	3.99481	4.59752	4.93813	-0.344812	11.5867	19.8133	20.374	16.2782	25.2845	32.3077
NM_029604	Pifo	H3K4me3-only	0.0340634	0.0403986	0.245873	0.258768	0.376733	0.867188	1.65119	1.03976	0.246083	2.85162	2.92536	3.46725	4.67005	5.59914	4.93188	0.0063352	0.21181	0.224705	0.34267	0.833125	1.61713	1.0057
NM_001122997	Dnmt3b	H3K4me3-only	4.77197	3.54266	9.394	30.496	99.1575	207.309	227.125	144.729	-0.429752	0.977155	2.67596	4.37707	5.44105	5.57276	4.92263	-1.22931	4.62203	25.724	94.3855	202.537	222.353	139.957
NM_001085415	Zfp467	H3K4me3-only	0.0699812	3.2475e-06	0.0692659	0.10991	1.50728	2.78595	2.11319	2.02436	-14.3954	-0.0148221	0.651283	4.42884	5.31506	4.91631	4.85435	-0.069978	-0.0007153	0.0399288	1.4373	2.71597	2.04321	1.95438
NM_146227	Prss50	H3K4me3-only	0.150909	0.220482	3.07724	9.16581	13.1541	17.9352	15.8022	4.3508	0.546982	4.34989	5.92451	6.44569	6.89297	6.7103	4.84953	0.069573	2.92633	9.0149	13.0032	17.7843	15.6513	4.19989
NM_009061	Rgs2	H3K4me3-only	0.0307446	0.0396088	0.0646797	0.0603091	0.395837	0.406091	1.00778	0.872861	0.365488	1.07298	0.972043	3.6865	3.7234	5.0347	4.82735	0.0088642	0.0339351	0.0295645	0.365092	0.375346	0.977035	0.842116
NM_153743	Dnmt3a	H3K4me3-only	0.718804	1.81777	2.68225	13.5734	40.3667	69.6108	53.4728	20.378	1.3385	1.89977	4.23904	5.81142	6.59757	6.21706	4.82527	1.09897	1.96345	12.8546	39.6479	68.892	52.754	19.6592
NM_021399	Bcl11b	H3K4me3-only	0.0117259	0.0204131	0.0185661	0.0140521	1.3784e-06	0	0.111285	0.326825	0.799797	0.662972	0.261087	-13.0544	-10	3.24649	4.80075	0.0086872	0.0068402	0.0023262	-0.0117245	-0.0117259	0.0995591	0.315099
NM_010572	Irs4	H3K4me3-only	0.0664469	0.0801959	0.0318056	0.0357238	0.434167	0.86322	0.829375	1.82341	0.271327	-1.06292	-0.895316	2.70798	3.69945	3.64175	4.77829	0.013749	-0.0346413	-0.0307231	0.36772	0.796773	0.762928	1.75696
NM_026268	Dusp6	H3K4me3-only	3.51992	19.8494	39.5002	32.8695	35.6165	47.4399	64.6156	95.476	2.49548	3.48825	3.22313	3.33893	3.75249	4.19827	4.76152	16.3295	35.9803	29.3496	32.0966	43.92	61.0957	91.9561
NM_011074	Cdk14	H3K4me3-only	0.0900362	0.141872	0.110685	0.0948105	0.0704841	0.0867078	0.411087	2.39153	0.656013	0.297883	0.0745417	-0.353207	-0.0543434	2.19087	4.73128	0.0518358	0.0206488	0.0047743	-0.0195521	-0.0033284	0.321051	2.30149
NM_172051	Tmcc3	H3K4me3-only	0.128328	0.135488	1.99942	1.17445	1.53441	1.02235	2.52863	3.34126	0.0783291	3.96167	3.19408	3.57978	2.99398	4.30045	4.70248	0.00716	1.87109	1.04612	1.40608	0.894022	2.4003	3.21293
NM_177353	Slc9a7	H3K4me3-only	0.268699	0.255962	0.447311	0.251678	1.4962	2.36291	1.817	6.96447	-0.0700613	0.735287	-0.0944118	2.47724	3.1365	2.7575	4.69595	-0.012737	0.178612	-0.017021	1.2275	2.09421	1.5483	6.69577
NM_183289	Tcerg1l	H3K4me3-only	0.0278848	0.025245	0.119865	0.402219	1.47034	1.23163	0.792866	0.700175	-0.143481	2.10386	3.85043	5.72053	5.46495	4.82953	4.65016	-0.0026398	0.0919802	0.374334	1.44246	1.20375	0.764981	0.67229
NM_080793	Setd7	H3K4me3-only	0.378362	0.515027	0.464247	0.362938	0.768848	2.18096	4.62357	9.44093	0.444881	0.295125	-0.0600441	1.02293	2.52712	3.61117	4.64109	0.136665	0.085885	-0.015424	0.390486	1.8026	4.24521	9.06257
NM_144853	Cyyr1	H3K4me3-only	0.0373966	0.011107	0.0469598	0.157538	0.412866	0.422702	0.672456	0.932901	-1.75144	0.328519	2.07472	3.46469	3.49866	4.16846	4.64074	-0.0262896	0.0095632	0.120141	0.375469	0.385305	0.635059	0.895504
NM_022030	Sv2a	H3K4me3-only	0.113529	0.105608	0.293383	0.280983	0.538537	2.08364	2.33669	2.7699	-0.104342	1.36972	1.30742	2.24598	4.19797	4.36333	4.6087	-0.007921	0.179854	0.167454	0.425008	1.97011	2.22316	2.65637
NM_009308	Syt4	H3K4me3-only	0.0872917	0.0845852	0.100199	0.119268	0.371341	0.667353	1.37717	2.1177	-0.0454392	0.198952	0.450291	2.08883	2.93453	3.97972	4.60051	-0.0027065	0.0129073	0.0319763	0.284049	0.580061	1.28988	2.03041
NM_001111118	Rad51ap2	H3K4me3-only	0.0147656	0.0473721	0.0233695	0.0226001	0.0375693	0.0283578	0.247925	0.357105	1.6818	0.662387	0.614089	1.34731	0.941506	4.06959	4.59604	0.0326065	0.0086039	0.0078345	0.0228037	0.0135922	0.233159	0.342339
NM_001029868	Pdzd4	H3K4me3-only	2.10111	1.08644	11.1976	23.341	30.1017	32.8482	42.5541	50.6035	-0.951543	2.41397	3.47364	3.84062	3.96659	4.34007	4.59001	-1.01467	9.09649	21.2399	28.0006	30.7471	40.453	48.5024
NM_015825	Sh3bgr	H3K4me3-only	0.0697053	0.0966024	0.0074483	0.0650494	0.0641333	0.0820523	0.164266	1.66589	0.470791	-3.22629	-0.0997326	-0.120195	0.235275	1.23669	4.57888	0.0268971	-0.062257	-0.0046559	-0.005572	0.012347	0.0945607	1.59618
NM_001033148	1700029J07Rik	H3K4me3-only	0.0172534	0.0198525	0.0338038	0.014672	0.00728072	0.0212331	0.0773661	0.40537	0.20244	0.970305	-0.233815	-1.24473	0.299434	2.16482	4.55429	0.0025991	0.0165504	-0.0025814	-0.00997268	0.0039797	0.0601127	0.388117
NM_025915	Tmem88	H3K4me3-only	0.564607	0.584593	2.60413	4.60283	7.8573	8.95198	10.5087	13.109	0.0501855	2.20548	3.0272	3.79871	3.98689	4.21819	4.53717	0.019986	2.03952	4.03822	7.29269	8.38737	9.94409	12.5444
NM_007726	Cnr1	H3K4me3-only	0.0460432	0.0774697	0.021628	0.0252901	0.0994126	0.182707	0.523942	1.04479	0.750644	-1.09009	-0.864415	1.11044	1.98847	3.50835	4.50408	0.0314265	-0.0244152	-0.0207531	0.0533694	0.136664	0.477899	0.998747
NM_001005740	Phactr1	H3K4me3-only	0.0279155	0	5.23843e-05	0	5.73565e-05	6.31982e-05	0.289488	0.630409	-10	-9.05772	-10	-8.92689	-8.78697	3.37437	4.49715	-0.0279155	-0.0278631	-0.0279155	-0.0278581	-0.0278523	0.261573	0.602494
NM_001033460	Drc1	H3K4me3-only	0.040135	0.065542	0.0640832	0.0530679	0.096657	0.219465	0.81487	0.899694	0.707559	0.675085	0.402979	1.26801	2.45106	4.34364	4.4865	0.025407	0.0239482	0.0129329	0.056522	0.17933	0.774735	0.859559
NM_007906	Eef1a2	H3K4me3-only	0.0270867	0.0483897	0	0.00493554	0.0989531	0.170528	0.633946	0.598683	0.837115	-10	-2.4563	1.86916	2.65435	4.5487	4.46614	0.021303	-0.0270867	-0.0221512	0.0718664	0.143441	0.606859	0.571596
NM_001048207	Gypc	H3K4me3-only	0.0126337	0.010094	0.0475303	0.0331079	0.0698989	0.085325	0.231386	0.275959	-0.323779	1.91157	1.3899	2.46799	2.75569	4.19495	4.4491	-0.0025397	0.0348966	0.0204742	0.0572652	0.0726913	0.218752	0.263325
NM_001100462	Tmem221	H3K4me3-only	0.0333135	0.037419	0.0253856	0.0143611	0.0963032	0.22734	0.3392	0.726502	0.167664	-0.392097	-1.21394	1.53148	2.77067	3.34796	4.44679	0.0041055	-0.0079279	-0.0189524	0.0629897	0.194026	0.305887	0.693188
NM_138606	Pim2	H3K4me3-only	2.99751	3.56092	7.31722	15.4684	41.9597	115.349	165.085	65.2666	0.248485	1.28753	2.36749	3.80717	5.2661	5.7833	4.44451	0.56341	4.31971	12.4709	38.9622	112.351	162.087	62.2691
NM_001160386	Dnah7b	H3K4me3-only	0.0108722	0.0286631	0.150246	0.0559145	0.0572896	0.0627985	0.0811337	0.230471	1.39855	3.78861	2.36258	2.39763	2.53009	2.89966	4.40587	0.0177909	0.139374	0.0450423	0.0464174	0.0519263	0.0702615	0.219599
NM_029464	Tex26	H3K4me3-only	0.102205	0.0666829	0.0377185	0.062271	0.201914	0.169495	0.368413	2.15481	-0.616077	-1.43812	-0.714833	0.982275	0.729777	1.84986	4.39802	-0.0355221	-0.0644865	-0.039934	0.099709	0.06729	0.266208	2.0526
NM_025944	Tmem246	H3K4me3-only	0.101625	0.140288	0.0436342	0.0614791	0.115685	0.189501	1.08371	2.13225	0.465136	-1.21972	-0.725087	0.186946	0.89895	3.41465	4.39105	0.038663	-0.0579908	-0.0401459	0.01406	0.087876	0.982085	2.03063
NR_040577	1700123M08Rik	H3K4me3-only	0.0651317	0.0229117	0.106226	0.27793	0.196373	0.40988	0.716954	1.35418	-1.50728	0.705705	2.09329	1.59216	2.65377	3.46045	4.37792	-0.04222	0.0410943	0.212798	0.131241	0.344748	0.651822	1.28905
NM_146258	Stard13	H3K4me3-only	0.0464771	0.0207182	0.111478	1.2966e-05	0.377366	0.688179	0.716815	0.94311	-1.16562	1.26217	-11.8076	3.02137	3.88819	3.94701	4.34283	-0.0257589	0.0650009	-0.0464641	0.330889	0.641702	0.670338	0.896633
NM_008867	Pla2r1	H3K4me3-only	0.0450915	0.0357113	0.0126123	0.0138323	0.0350115	0.178984	0.162603	0.906493	-0.336475	-1.83802	-1.70481	-0.365027	1.9889	1.85043	4.32937	-0.0093802	-0.0324792	-0.0312592	-0.01008	0.133892	0.117511	0.861402
NR_045820	A930024E05Rik	H3K4me3-only	0.327747	0.193463	1.48366	2.44293	3.4366	4.90596	4.98802	6.50361	-0.760525	2.17851	2.89796	3.39033	3.90388	3.92781	4.31059	-0.134284	1.15591	2.11518	3.10885	4.57821	4.66027	6.17586
NM_001113181	Gria4	H3K4me3-only	0.139658	0.186798	0.108475	0.273057	0.300581	0.278306	0.99172	2.76224	0.419581	-0.364536	0.967304	1.10586	0.994774	2.82803	4.30587	0.04714	-0.031183	0.133399	0.160923	0.138648	0.852062	2.62258
NM_001197322	Foxp1	H3K4me3-only	0.3431	0.263641	0.315995	1.51198	5.611	4.1892	4.11851	6.71328	-0.380054	-0.118727	2.13974	4.03156	3.60997	3.58542	4.29032	-0.079459	-0.027105	1.16888	5.2679	3.8461	3.77541	6.37018
NM_001198914	Myb	H3K4me3-only	0.309836	0.0212585	0.162306	0.537319	2.49714	5.55776	5.65785	6.03806	-3.86539	-0.932788	0.794274	3.0107	4.16493	4.19068	4.28451	-0.288577	-0.14753	0.227483	2.1873	5.24792	5.34801	5.72822
NM_008813	Enpp1	H3K4me3-only	0.0140592	0.0501475	0.351256	0.182678	0.122243	0.0501184	0.0870857	0.27335	1.83466	4.64294	3.69972	3.12017	1.83383	2.63092	4.28116	0.0360883	0.337197	0.168619	0.108184	0.0360592	0.0730265	0.259291
NM_019946	Mgst1	H3K4me3-only	0.385778	0.327275	0.168898	0.180668	0.575824	0.513216	2.26171	7.49046	-0.237267	-1.19162	-1.09443	0.577857	0.411795	2.55157	4.27921	-0.058503	-0.21688	-0.20511	0.190046	0.127438	1.87593	7.10468
NM_001143849	Pde2a	H3K4me3-only	0.058755	0.162442	0.443627	3.829	1.77354	2.87063	3.17709	1.13549	1.46714	2.91656	6.02611	4.91578	5.61051	5.75685	4.27246	0.103687	0.384872	3.77025	1.71479	2.81187	3.11834	1.07674
NM_144841	Otx2	H3K4me3-only	2.69809	6.24011	12.3596	17.9932	58.9901	50.2689	50.162	51.9537	1.20963	2.19562	2.73744	4.45046	4.21966	4.21658	4.26722	3.54202	9.66151	15.2951	56.292	47.5708	47.4639	49.2556
NM_013476	Ar	H3K4me3-only	0.0336841	0.0288946	0.0613466	0.0508761	0.323	0.88107	0.541053	0.647067	-0.221268	0.864916	0.59492	3.26139	4.70912	4.00563	4.26378	-0.0047895	0.0276625	0.017192	0.289316	0.847386	0.507369	0.613383
NM_011882	Rnasel	H3K4me3-only	0.0161827	0.0111382	0	0	0.00414412	0.00245098	0.0144655	0.302371	-0.538936	-10	-10	-1.96531	-2.72302	-0.161836	4.2238	-0.0050445	-0.0161827	-0.0161827	-0.0120386	-0.0137317	-0.0017172	0.286188
NM_148938	Slc1a3	H3K4me3-only	0.373643	0.337089	0.963573	2.74277	3.05418	3.88108	7.7219	6.91916	-0.148531	1.36673	2.8759	3.03105	3.37673	4.36922	4.21086	-0.036554	0.58993	2.36913	2.68054	3.50744	7.34826	6.54552
NM_183311	Tmem145	H3K4me3-only	0.0402816	0.0428628	0.0163654	0.0359452	0.271668	0.622436	0.867302	0.7456	0.0896051	-1.29947	-0.164322	2.75365	3.94973	4.42834	4.21021	0.0025812	-0.0239162	-0.0043364	0.231386	0.582154	0.82702	0.705318
NM_173731	Hmgcll1	H3K4me3-only	0.106077	0.127021	0.112091	0.368259	0.636602	0.977777	1.13364	1.93002	0.259955	0.0795586	1.79561	2.58528	3.20439	3.41778	4.18543	0.020944	0.006014	0.262182	0.530525	0.8717	1.02756	1.82394
NM_001271746	Dnmt3b	H3K4me3-only	1.60727	1.63228	2.50589	7.88575	17.3146	28.967	30.0257	28.6974	0.0222763	0.640711	2.29464	3.4293	4.17173	4.22351	4.15824	0.02501	0.89862	6.27848	15.7073	27.3597	28.4184	27.0901
NM_001146031	Nrcam	H3K4me3-only	0.145303	0.162317	0.19169	0.101478	0.549842	1.169	1.70307	2.56316	0.15975	0.399711	-0.517897	1.91995	3.00814	3.551	4.14079	0.017014	0.046387	-0.043825	0.404539	1.0237	1.55777	2.41786
NM_001161769	Lmo4	H3K4me3-only	0.513822	1.61292	5.68994	5.04093	8.00392	4.91796	6.91838	9.00531	1.65033	3.46907	3.29435	3.96137	3.25872	3.75109	4.13144	1.0991	5.17612	4.52711	7.4901	4.40414	6.40456	8.49149
NM_025730	Lrrk2	H3K4me3-only	0.0306231	0.0430746	0.122615	0.207072	0.565544	0.61977	0.383566	0.535676	0.492217	2.00144	2.75744	4.20695	4.33904	3.64678	4.12867	0.0124515	0.0919919	0.176449	0.534921	0.589147	0.352943	0.505053
NM_008610	Mmp2	H3K4me3-only	0.478659	0.567168	0.455756	0.494078	1.62764	2.01981	5.87873	8.29961	0.244778	-0.0707366	0.0457406	1.76571	2.07715	3.61843	4.11597	0.088509	-0.022903	0.015419	1.14898	1.54115	5.40007	7.82095
NM_133974	Cdcp1	H3K4me3-only	0.184618	0.197188	0.24115	0.0694991	0.167583	0.527001	1.43113	3.14332	0.0950285	0.385388	-1.40948	-0.139667	1.51326	2.95454	4.08967	0.01257	0.056532	-0.115119	-0.017035	0.342383	1.24651	2.9587
NM_001039466	Trim46	H3K4me3-only	0.0399307	0.0190976	0.027297	0.0782227	0.121613	0.596855	1.40392	0.671603	-1.06411	-0.548756	0.970089	1.60673	3.90181	5.13582	4.07204	-0.0208331	-0.0126337	0.038292	0.0816823	0.556924	1.36399	0.631672
NM_011360	Sgce	H3K4me3-only	0.394742	0.325404	0.902539	0.774197	0.871868	0.63323	2.29786	6.57337	-0.278678	1.19308	0.971791	1.1432	0.68182	2.54131	4.05765	-0.069338	0.507797	0.379455	0.477126	0.238488	1.90312	6.17863
NM_016866	Stk39	H3K4me3-only	1.56606	1.0292	0.763767	0.752668	1.83641	2.88962	10.3403	25.7686	-0.605616	-1.03593	-1.05705	0.229749	0.88374	2.72307	4.0404	-0.53686	-0.802293	-0.813392	0.27035	1.32356	8.77424	24.2025
NM_009238	Sox4	H3K4me3-only	1.17386	0.632313	4.60312	4.15994	9.9664	15.1038	15.239	19.0678	-0.89255	1.97135	1.8253	3.08581	3.68558	3.69844	4.02181	-0.541547	3.42926	2.98608	8.79254	13.9299	14.0651	17.8939
NM_016669	Crym	H3K4me3-only	0.405699	0.579639	4.86919	1.66411	0.56467	0.914534	3.79613	6.57787	0.514745	3.5852	2.03627	0.476998	1.17263	3.22605	4.01914	0.17394	4.46349	1.25841	0.158971	0.508835	3.39043	6.17217
NM_146062	Pphln1	H3K4me3-only	1.39309	1.53355	1.80389	0.95281	2.47243	13.7698	15.8866	22.5459	0.138587	0.372823	-0.548028	0.827641	3.30515	3.51145	4.0165	0.14046	0.4108	-0.44028	1.07934	12.3767	14.4935	21.1528
NM_001081253	Fbxo43	H3K4me3-only	0.01883	0.0185911	0.0249195	0.0372843	0.0781988	0.11043	0.189151	0.304452	-0.0184209	0.404242	0.985535	2.05411	2.55203	3.32843	4.01511	-0.0002389	0.0060895	0.0184543	0.0593688	0.0916	0.170321	0.285622
NM_011353	Serf1	H3K4me3-only	0.8165	1.31008	2.7011	2.08068	2.09159	2.92671	7.86051	12.9096	0.68213	1.72602	1.34953	1.35708	1.84176	3.2671	3.98285	0.49358	1.8846	1.26418	1.27509	2.11021	7.04401	12.0931
NM_178681	Dgkb	H3K4me3-only	0.0393268	0.0338569	0.0194856	0.125219	0.207907	0.169186	0.343573	0.621744	-0.216063	-1.0131	1.67087	2.40235	2.10503	3.12703	3.98274	-0.0054699	-0.0198412	0.0858922	0.16858	0.129859	0.304246	0.582417
NM_028325	Zcchc12	H3K4me3-only	0.0776803	0.396651	1.27344	0.30955	0.198231	0.806875	1.19992	1.22429	2.35225	4.03504	1.99455	1.35156	3.37672	3.94925	3.97825	0.318971	1.19576	0.23187	0.120551	0.729195	1.12224	1.14661
NM_198637	1700016K19Rik	H3K4me3-only	0.0334865	0.148719	0.0799965	0.100718	0.109805	0.327614	0.768449	0.525205	2.15094	1.25636	1.58867	1.71329	3.29035	4.5203	3.97123	0.115232	0.04651	0.0672315	0.0763185	0.294127	0.734963	0.491719
NM_198095	Bst2	H3K4me3-only	5.96425	3.45984	4.10828	9.97349	24.8851	47.3794	73.4674	92.3737	-0.785635	-0.537806	0.741758	2.06087	2.98985	3.62269	3.95307	-2.50441	-1.85597	4.00924	18.9209	41.4151	67.5032	86.4094
NM_177139	Lypd6	H3K4me3-only	0.124858	0.165556	0.126159	0.158423	0.160842	1.81251	1.96708	1.89496	0.407031	0.0149549	0.343494	0.365356	3.85963	3.9777	3.92381	0.040698	0.001301	0.033565	0.035984	1.68765	1.84222	1.7701
NM_008478	L1cam	H3K4me3-only	0.0500858	0.118232	0.140724	0.164662	0.271689	0.1959	0.237752	0.759781	1.23915	1.49039	1.71703	2.43948	1.96764	2.24698	3.92311	0.0681462	0.0906382	0.114576	0.221603	0.145814	0.187666	0.709695
NM_173007	Tspan12	H3K4me3-only	0.117447	0.196288	0.142962	0.0622274	0.0440253	0.070103	0.368956	1.75302	0.740962	0.283622	-0.916388	-1.41561	-0.744462	1.65144	3.89976	0.078841	0.025515	-0.0552196	-0.0734217	-0.047344	0.251509	1.63557
NM_028484	1700037C18Rik	H3K4me3-only	0.0661111	0.0768455	0.281026	0.3947	0.479619	0.762363	1.51988	0.974144	0.217068	2.08774	2.57779	2.85892	3.52751	4.52292	3.88117	0.0107344	0.214915	0.328589	0.413508	0.696252	1.45377	0.908033
NM_001033465	6430531B16Rik	H3K4me3-only	0.0429565	0.041154	0.600226	0.526626	0.431994	0.145435	0.267508	0.624935	-0.0618438	3.80456	3.61583	3.33006	1.75943	2.63863	3.86276	-0.0018025	0.55727	0.48367	0.389037	0.102479	0.224552	0.581979
NR_028380	Ftx	H3K4me3-only	0.389152	0.266078	0.28563	0.20513	0.417268	3.03299	3.17543	5.6289	-0.548485	-0.446186	-0.923795	0.100641	2.96234	3.02855	3.85445	-0.123074	-0.103522	-0.184022	0.028116	2.64384	2.78628	5.23975
NM_175473	Fras1	H3K4me3-only	0.141117	0.108825	0.0752059	0.0366806	0.0869916	0.180055	0.461087	2.00833	-0.374882	-0.907974	-1.9438	-0.697944	0.351546	1.70815	3.83103	-0.032292	-0.0659111	-0.104436	-0.0541254	0.038938	0.31997	1.86721
NM_011348	Sema3e	H3K4me3-only	0.308368	0.372449	1.50777	0.939817	2.46125	2.17665	2.71271	4.37561	0.27239	2.28969	1.60773	2.99667	2.81938	3.13701	3.82676	0.064081	1.1994	0.631449	2.15288	1.86828	2.40434	4.06724
NM_175510	Unc80	H3K4me3-only	0.0191262	0.0291088	0.024817	0.014916	0.0132578	0.0421737	0.110596	0.268895	0.605905	0.375778	-0.35869	-0.528709	1.14079	2.53168	3.81342	0.0099826	0.0056908	-0.0042102	-0.0058684	0.0230475	0.0914698	0.249769
NM_027721	Katnal2	H3K4me3-only	0.31917	0.19753	0.057836	0.114614	0.0681805	0.914375	2.54398	4.46491	-0.692253	-2.46429	-1.47754	-2.22689	1.51846	2.99469	3.80623	-0.12164	-0.261334	-0.204556	-0.250989	0.595205	2.22481	4.14574
NM_027756	Mfap3l	H3K4me3-only	0.151316	0.167659	1.12514	0.542835	0.902502	2.72435	1.9808	2.09565	0.147965	2.89447	1.84295	2.57637	4.17028	3.71045	3.79176	0.016343	0.973824	0.391519	0.751186	2.57303	1.82948	1.94433
NM_010221	Fkbp10	H3K4me3-only	0.789069	0.830221	0.783903	1.50762	3.64589	7.28362	9.18619	10.8894	0.073344	-0.00947632	0.934049	2.20805	3.20643	3.54124	3.78663	0.041152	-0.005166	0.718551	2.85682	6.49455	8.39712	10.1003
NM_177784	Klhl23	H3K4me3-only	0.451363	0.717823	0.702799	0.557527	0.744743	1.57051	3.21524	6.18116	0.66934	0.638824	0.304754	0.722454	1.79887	2.83257	3.77552	0.26646	0.251436	0.106164	0.29338	1.11915	2.76388	5.7298
NM_013691	Thbs3	H3K4me3-only	0.404238	0.412963	0.794411	0.969157	2.25946	4.15037	5.88706	5.51471	0.0308076	0.974681	1.26153	2.4827	3.35996	3.86427	3.77001	0.008725	0.390173	0.564919	1.85522	3.74613	5.48282	5.11047
NM_175506	Adamts19	H3K4me3-only	0.042459	0.0113656	0.00967316	0.038783	0.0544331	0.108498	0.378112	0.577618	-1.9014	-2.13401	-0.130646	0.358414	1.35353	3.15467	3.76597	-0.0310934	-0.0327858	-0.003676	0.0119741	0.066039	0.335653	0.535159
NR_038860	Fam187b	H3K4me3-only	0.0562695	0.0484304	0.0334943	3.19627e-07	0.0804445	0.273538	0.450106	0.764843	-0.21644	-0.748438	-17.4256	0.515641	2.28132	2.99984	3.76474	-0.0078391	-0.0227752	-0.0562692	0.024175	0.217269	0.393837	0.708574
NM_001114088	Pdlim7	H3K4me3-only	1.23642	1.52181	2.67762	2.1307	5.01727	7.33777	9.76093	16.7107	0.299619	1.11478	0.785159	2.02073	2.56917	2.98085	3.75653	0.28539	1.4412	0.89428	3.78085	6.10135	8.52451	15.4743
NM_170599	Igsf11	H3K4me3-only	0.0812549	0.147116	0.099763	0.146358	0.140955	0.467963	0.554442	1.09471	0.856427	0.29605	0.848975	0.794708	2.52587	2.77051	3.75195	0.0658611	0.0185081	0.0651031	0.0597001	0.386708	0.473187	1.01346
NM_001114332	Slc16a10	H3K4me3-only	0.119494	0.17132	0.166469	0.147086	0.186488	0.354173	1.24444	1.60512	0.519755	0.478315	0.299722	0.642145	1.56752	3.38049	3.74767	0.051826	0.046975	0.027592	0.066994	0.234679	1.12495	1.48563
NM_172471	Itih5	H3K4me3-only	0.0368402	0.0539676	0.0102127	0.0159128	0.0180852	0.0230615	0.146359	0.491982	0.550813	-1.85092	-1.21109	-1.02647	-0.675795	1.99016	3.73925	0.0171274	-0.0266275	-0.0209274	-0.018755	-0.0137787	0.109519	0.455142
NM_011204	Ptpn13	H3K4me3-only	1.17035	1.11099	1.70446	3.21108	5.89613	12.0326	13.7019	15.5933	-0.0750942	0.542375	1.45612	2.33283	3.36194	3.54936	3.73591	-0.05936	0.53411	2.04073	4.72578	10.8622	12.5315	14.423
NM_178749	Stk32a	H3K4me3-only	0.142779	0.093437	0.436879	0.56574	0.507836	0.294218	0.838719	1.89546	-0.611718	1.61345	1.98636	1.83058	1.0431	2.5544	3.73069	-0.049342	0.2941	0.422961	0.365057	0.151439	0.69594	1.75268
NM_010217	Ctgf	H3K4me3-only	2.27385	49.5384	29.7816	16.0675	8.65618	3.00397	5.01728	30.185	4.44534	3.71121	2.82094	1.92859	0.401733	1.14177	3.73062	47.2645	27.5078	13.7936	6.38233	0.73012	2.74343	27.9111
NM_011898	Spry4	H3K4me3-only	0.293375	7.96905	15.7304	12.2258	7.93422	6.58609	5.60342	3.83648	4.76359	5.74467	5.38104	4.75727	4.4886	4.25549	3.70897	7.67568	15.437	11.9324	7.64084	6.29272	5.31004	3.5431
NM_029444	4930447C04Rik	H3K4me3-only	0.320932	0.699651	0.675261	0.57828	1.50454	2.29127	3.4352	4.13597	1.12437	1.07318	0.849501	2.22898	2.83581	3.42005	3.68789	0.378719	0.354329	0.257348	1.18361	1.97034	3.11427	3.81504
NM_019813	Dbn1	H3K4me3-only	0.613129	0.439984	0.498005	0.60232	1.2576	2.37563	5.80476	7.82735	-0.47874	-0.30003	-0.0256605	1.03641	1.95405	3.24297	3.67426	-0.173145	-0.115124	-0.010809	0.644471	1.7625	5.19163	7.21422
NM_010321	Gnmt	H3K4me3-only	0.470409	0.270045	0.200447	0.243308	0.595657	0.747501	3.53747	5.99876	-0.800716	-1.23069	-0.951132	0.340566	0.66816	2.91073	3.67268	-0.200364	-0.269962	-0.227101	0.125248	0.277092	3.06706	5.52835
NM_028980	Ppp4r4	H3K4me3-only	0.486194	0.369673	0.469427	0.326586	0.549809	0.899631	1.81301	6.17868	-0.395282	-0.0506313	-0.574069	0.177398	0.887801	1.89878	3.66769	-0.116521	-0.016767	-0.159608	0.063615	0.413437	1.32682	5.69249
NM_011020	Hspa4l	H3K4me3-only	0.492376	0.670373	1.18115	1.0332	1.59947	1.56835	2.88518	6.25602	0.445204	1.26236	1.06929	1.69976	1.67142	2.55083	3.66741	0.177997	0.688774	0.540824	1.10709	1.07597	2.3928	5.76364
NM_001033668	Dnah1	H3K4me3-only	0.0212046	0.0313721	0.0619467	0.0233893	0.00813698	0.0067256	0.081444	0.267087	0.565105	1.54665	0.141471	-1.38181	-1.65664	1.94143	3.65486	0.0101675	0.0407421	0.0021847	-0.0130676	-0.014479	0.0602394	0.245882
NM_008482	Lamb1	H3K4me3-only	3.22319	3.07083	9.7923	5.20489	6.92103	28.4595	36.1648	40.5943	-0.0698606	1.60316	0.691378	1.1025	3.14235	3.48803	3.65472	-0.15236	6.56911	1.9817	3.69784	25.2363	32.9416	37.3711
NM_177335	D930020B18Rik	H3K4me3-only	0.0165292	0.028039	0.0214131	0.0328015	0.0461688	0.0503103	0.139779	0.207101	0.762418	0.373477	0.988745	1.4819	1.60584	3.08006	3.64725	0.0115098	0.0048839	0.0162723	0.0296396	0.0337811	0.12325	0.190572
NM_001177352	Myc	H3K4me3-only	0.595258	3.03674	8.24426	9.84679	11.521	7.34013	7.5216	7.45633	2.35094	3.7918	4.04807	4.27461	3.62422	3.65945	3.64688	2.44148	7.649	9.25153	10.9257	6.74487	6.92634	6.86107
NM_023118	Dab2	H3K4me3-only	0.0626945	0.093544	0.105974	0.070607	0.0602303	0.182865	0.424991	0.780747	0.577306	0.7573	0.171472	-0.0578494	1.54437	2.76102	3.63844	0.0308495	0.0432795	0.0079125	-0.0024642	0.12017	0.362297	0.718052
NM_207663	Synm	H3K4me3-only	0.145177	0.0789149	0.0769468	0.155107	0.221954	0.296888	0.869474	1.80253	-0.879443	-0.91588	0.0954509	0.612448	1.03211	2.58233	3.63414	-0.0662621	-0.0682302	0.00993	0.076777	0.151711	0.724297	1.65735
NM_028307	Tdrkh	H3K4me3-only	0.101384	0.0861333	0.172654	0.134238	0.23316	0.238104	0.841244	1.25192	-0.235187	0.768054	0.404963	1.20149	1.23176	3.05269	3.62624	-0.0152507	0.07127	0.032854	0.131776	0.13672	0.73986	1.15054
NM_009728	Atp10a	H3K4me3-only	0.544712	0.569063	0.51913	0.7062	2.11255	3.52533	4.4311	6.69142	0.0630947	-0.0693978	0.374583	1.95542	2.69419	3.0241	3.61875	0.024351	-0.025582	0.161488	1.56784	2.98062	3.88639	6.14671
NM_001112744	Arhgef16	H3K4me3-only	0.596466	0.38658	0.23008	0.154183	0.328653	1.08402	4.33596	7.32438	-0.625673	-1.3743	-1.9518	-0.859875	0.86188	2.86184	3.61819	-0.209886	-0.366386	-0.442283	-0.267813	0.487554	3.73949	6.72791
NM_023270	Rnf128	H3K4me3-only	0.656824	1.02069	4.50499	2.47422	2.84424	1.55983	2.98598	8.04997	0.635966	2.77795	1.9134	2.11446	1.24781	2.18463	3.6154	0.363866	3.84817	1.8174	2.18742	0.903006	2.32916	7.39315
NR_073433	1600023N17Rik	H3K4me3-only	0.114272	0.552053	0.639524	0.372618	0.403206	0.459279	1.06047	1.39993	2.27233	2.48453	1.70523	1.81905	2.0069	3.21416	3.61481	0.437781	0.525252	0.258346	0.288934	0.345007	0.946198	1.28566
NM_175437	Gsap	H3K4me3-only	0.0973455	0.133442	0.158646	0.206692	0.164467	0.241876	0.392333	1.18622	0.455027	0.704625	1.0863	0.756612	1.31308	2.01089	3.60711	0.0360965	0.0613005	0.109346	0.0671215	0.144531	0.294987	1.08887
NM_016719	Grb14	H3K4me3-only	0.119754	0.361634	0.497278	0.243044	0.556112	0.402166	0.931455	1.45686	1.59446	2.05398	1.02114	2.2153	1.74772	2.95941	3.60472	0.24188	0.377524	0.12329	0.436358	0.282412	0.811701	1.33711
NM_001082976	Tc2n	H3K4me3-only	0.0457237	0.103698	0.0958819	0.0692867	0.169708	0.291661	0.444178	0.549303	1.18137	1.06832	0.599636	1.89204	2.67328	3.28012	3.58659	0.0579743	0.0501582	0.023563	0.123984	0.245937	0.398454	0.503579
NM_053099	Setbp1	H3K4me3-only	0.319127	0.202561	0.157145	0.12995	0.177453	0.852178	2.02939	3.83296	-0.655774	-1.02203	-1.29617	-0.846694	1.41702	2.66884	3.58626	-0.116566	-0.161982	-0.189177	-0.141674	0.533051	1.71026	3.51383
NM_009181	St8sia2	H3K4me3-only	0.0571813	0.0431095	0.0117599	0.0145319	0.0234379	0.0643846	0.104177	0.681385	-0.407538	-2.28167	-1.97632	-1.2867	0.171172	0.865421	3.57485	-0.0140718	-0.0454214	-0.0426494	-0.0337434	0.0072033	0.0469957	0.624204
NM_010848	Myb	H3K4me3-only	0.729078	0.227273	0.278557	0.906019	2.91675	6.42978	9.03057	8.64984	-1.68165	-1.3881	0.313468	2.00022	3.14062	3.63067	3.56853	-0.501805	-0.450521	0.176941	2.18767	5.7007	8.30149	7.92076
NM_013675	Sptb	H3K4me3-only	0.400779	0.2052	0.372255	0.973052	2.63963	3.26069	4.38875	4.71874	-0.965776	-0.106516	1.27971	2.71946	3.0243	3.45293	3.55752	-0.195579	-0.028524	0.572273	2.23885	2.85991	3.98797	4.31796
NR_036602	4933421O10Rik	H3K4me3-only	0.0407848	0.0496452	0.0562528	0.0342526	0.0461895	0.069628	0.161936	0.47354	0.283623	0.463893	-0.251818	0.179533	0.771636	1.98932	3.53738	0.0088604	0.015468	-0.0065322	0.0054047	0.0288432	0.121151	0.432755
NM_008071	Gabrb3	H3K4me3-only	0.374513	0.387576	0.443668	0.469488	0.863776	2.43675	3.71448	4.34147	0.0494634	0.244465	0.326072	1.20564	2.70187	3.31007	3.5351	0.013063	0.069155	0.094975	0.489263	2.06224	3.33997	3.96696
NM_009230	Soat1	H3K4me3-only	3.33987	1.97729	1.9769	1.64097	3.64955	22.4134	31.1391	38.4349	-0.756267	-0.756552	-1.02524	0.127927	2.7465	3.22086	3.52455	-1.36258	-1.36297	-1.6989	0.30968	19.0735	27.7992	35.095
NM_007913	Egr1	H3K4me3-only	0.132773	129.742	0.767699	0.145804	0.285928	1.51533	0.884929	1.51214	9.93247	2.53158	0.135069	1.10669	3.5126	2.7366	3.50956	129.609	0.634926	0.013031	0.153155	1.38256	0.752156	1.37937
NM_011412	Slit3	H3K4me3-only	0.704662	0.360949	0.298753	0.310708	0.209355	0.442066	1.82912	8.0039	-0.965136	-1.23798	-1.18137	-1.75098	-0.67267	1.37615	3.5057	-0.343713	-0.405909	-0.393954	-0.495307	-0.262596	1.12446	7.29924
NM_007866	Dll3	H3K4me3-only	0.306804	0.312667	0.188332	0.241542	1.09213	3.02591	4.15518	3.45613	0.0273097	-0.704039	-0.345043	1.83176	3.30198	3.75952	3.49377	0.005863	-0.118472	-0.065262	0.785326	2.71911	3.84838	3.14933
NM_027164	Lrrc27	H3K4me3-only	0.184828	0.294384	0.318585	0.471862	1.5085	2.06691	2.27396	2.06271	0.671516	0.785495	1.35218	3.02886	3.48322	3.62095	3.48029	0.109556	0.133757	0.287034	1.32367	1.88208	2.08913	1.87788
NM_027828	Fam110c	H3K4me3-only	0.0421979	0.0121138	0.00696903	0.00371208	0.0298193	0.0567063	0.211651	0.470471	-1.80052	-2.59814	-3.50687	-0.500925	0.426338	2.32644	3.47886	-0.0300841	-0.0352289	-0.0384858	-0.0123786	0.0145084	0.169453	0.428273
NM_009154	Sema5a	H3K4me3-only	0.0742364	0.0495864	0.049574	0.0928936	0.18354	0.20495	0.606845	0.824995	-0.582182	-0.582543	0.323452	1.3059	1.46507	3.03113	3.47419	-0.02465	-0.0246624	0.0186572	0.109304	0.130714	0.532609	0.750759
NM_008532	Epcam	H3K4me3-only	11.7192	14.5339	24.2561	23.6015	85.4168	93.1697	107.402	130.092	0.310548	1.04947	1.01	2.86565	2.99099	3.19607	3.47259	2.8147	12.5369	11.8823	73.6976	81.4505	95.6828	118.373
NM_001110300	Ap1m2	H3K4me3-only	0.729694	0.477456	0.727719	0	0.383467	0.79287	2.67811	8.09684	-0.611924	-0.00391011	-10	-0.928189	0.119793	1.87585	3.472	-0.252238	-0.001975	-0.729694	-0.346227	0.063176	1.94842	7.36715
NM_172486	Zfp677	H3K4me3-only	0.222567	0.44368	0.445623	0.380731	1.08168	0.834324	1.45799	2.46388	0.99528	1.00158	0.774532	2.28096	1.90637	2.71167	3.46862	0.221113	0.223056	0.158164	0.859113	0.611757	1.23542	2.24131
NM_021716	Fign	H3K4me3-only	0.0560226	0	4.39807e-06	0	0.0206596	0	0.237631	0.616601	-10	-13.6369	-10	-1.4392	-10	2.08464	3.46026	-0.0560226	-0.0560182	-0.0560226	-0.035363	-0.0560226	0.181608	0.560578
NM_173012	Letm2	H3K4me3-only	0.0921685	0.0688945	0.188904	0.103514	0.212551	0.139421	0.378001	1.00913	-0.419885	1.03531	0.16748	1.20546	0.597102	2.03604	3.45269	-0.023274	0.0967355	0.0113455	0.120382	0.0472525	0.285832	0.916962
NM_009482	Utf1	H3K4me3-only	6.58752	5.20636	46.5945	76.1845	96.8816	93.2309	86.5472	71.9427	-0.33946	2.82235	3.53169	3.87842	3.823	3.71568	3.44904	-1.38116	40.007	69.597	90.2941	86.6434	79.9597	65.3552
NM_146260	Tmie	H3K4me3-only	0.0692282	0.0543069	0.0997696	0.213511	0.247618	0.532267	1.06715	0.755086	-0.350224	0.52724	1.62488	1.83868	2.94272	3.94626	3.44721	-0.0149213	0.0305414	0.144283	0.17839	0.463039	0.997922	0.685858
NM_008102	Gch1	H3K4me3-only	0.309516	0.362516	0.278531	0.136867	0.184669	0.130941	1.26167	3.37099	0.228031	-0.152176	-1.17724	-0.745072	-1.2411	2.02725	3.44509	0.053	-0.030985	-0.172649	-0.124847	-0.178575	0.952154	3.06147
NM_011067	Per3	H3K4me3-only	0.296075	0.297301	0.227586	0.272472	0.291236	0.648225	1.09785	3.21754	0.00596164	-0.379551	-0.119855	-0.023774	1.13053	1.89065	3.44192	0.001226	-0.068489	-0.023603	-0.004839	0.35215	0.801775	2.92146
NM_020510	Fzd2	H3K4me3-only	0.748373	0.47916	0.657253	0.696283	2.08962	5.44935	8.58979	8.08382	-0.64325	-0.187309	-0.104084	1.48141	2.86425	3.52079	3.43321	-0.269213	-0.09112	-0.05209	1.34125	4.70098	7.84142	7.33545
NM_020505	Vav3	H3K4me3-only	0.0797819	0.108368	0.173318	0.0880273	0.0720893	0.0428459	0.116757	0.860817	0.441805	1.11929	0.14189	-0.146276	-0.896904	0.549376	3.43157	0.0285861	0.0935361	0.0082454	-0.0076926	-0.036936	0.0369751	0.781035
NM_175122	Rab39b	H3K4me3-only	0.171153	0.18533	0.224533	0.168715	0.1733	0.413664	1.26706	1.83623	0.11481	0.391641	-0.0206983	0.0179851	1.27317	2.88813	3.42339	0.014177	0.05338	-0.002438	0.002147	0.242511	1.09591	1.66508
NM_011226	Rab19	H3K4me3-only	0.173949	0.0790107	0.310335	0.566199	1.19234	3.31299	2.49207	1.86282	-1.13854	0.835162	1.70264	2.77706	4.2514	3.84061	3.42075	-0.0949383	0.136386	0.39225	1.01839	3.13904	2.31812	1.68887
NM_016694	Park2	H3K4me3-only	0.0955669	0.0577838	0.0317557	0.0124516	0.165847	0.319834	0.790952	1.01428	-0.725846	-1.5895	-2.94018	0.79527	1.74274	3.04901	3.4078	-0.0377831	-0.0638112	-0.0831153	0.0702801	0.224267	0.695385	0.918713
NM_010200	Fgf13	H3K4me3-only	0.167143	0.100662	0.217822	0.16166	0.280946	0.442065	1.20274	1.76863	-0.731564	0.382067	-0.0481202	0.74921	1.40318	2.84717	3.40348	-0.066481	0.050679	-0.005483	0.113803	0.274922	1.0356	1.60149
NM_153410	Gpsm1	H3K4me3-only	0.364371	0.283435	0.253434	0.424074	0.960386	1.59712	2.50276	3.85555	-0.36239	-0.523798	0.218908	1.39821	2.13199	2.78004	3.40346	-0.080936	-0.110937	0.059703	0.596015	1.23275	2.13839	3.49118
NM_177013	Tmem229a	H3K4me3-only	0.0629913	0.0382286	0.175898	0.300823	0.740197	0.62132	0.379195	0.664087	-0.7205	1.48151	2.25569	3.55468	3.30211	2.58972	3.39815	-0.0247627	0.112907	0.237832	0.677206	0.558329	0.316204	0.601096
NM_199017	9230110C19Rik	H3K4me3-only	1.21227	1.15258	1.29048	2.28652	4.51215	7.23123	9.14538	12.7682	-0.0728442	0.0901967	0.915442	1.8961	2.57653	2.91533	3.39677	-0.05969	0.07821	1.07425	3.29988	6.01896	7.93311	11.5559
NM_001164627	Arhgap8	H3K4me3-only	0.732093	0.00017415	0.000182885	1.52288	2.49781	3.12383	6.21908	7.70952	-12.0375	-11.9669	1.0567	1.77056	2.09322	3.0866	3.39654	-0.731919	-0.73191	0.790787	1.76572	2.39174	5.48699	6.97743
NM_001164805	Thsd7a	H3K4me3-only	0.0439757	0.0319434	0.0161518	0.00689154	0.0103257	0.0758088	0.135922	0.462329	-0.461189	-1.44501	-2.67381	-2.09047	0.785659	1.628	3.39414	-0.0120323	-0.0278239	-0.0370842	-0.03365	0.0318331	0.0919463	0.418353
NM_013845	Ror1	H3K4me3-only	0.296777	0.207071	0.291745	1.21648	0.773025	2.44448	2.4658	3.10103	-0.519254	-0.0246714	2.03526	1.38114	3.04208	3.0546	3.3853	-0.089706	-0.005032	0.919703	0.476248	2.1477	2.16902	2.80425
NM_001252505	St6gal1	H3K4me3-only	0.462403	0.435933	0.236301	0.634744	1.08237	2.43575	3.11671	4.81918	-0.0850443	-0.968525	0.457024	1.22697	2.39714	2.7528	3.38157	-0.02647	-0.226102	0.172341	0.619967	1.97335	2.65431	4.35678
NM_001198823	App	H3K4me3-only	1.34316	1.31783	1.66557	0.528158	0.390082	1.37308	5.81651	13.9261	-0.0274669	0.310385	-1.34659	-1.78378	0.0317845	2.11452	3.37409	-0.02533	0.32241	-0.815002	-0.953078	0.02992	4.47335	12.5829
NM_013492	Clu	H3K4me3-only	0.602636	0.884615	5.08158	2.16296	1.34881	1.33268	2.8775	6.24369	0.553763	3.07592	1.84365	1.16233	1.14497	2.25546	3.37304	0.281979	4.47894	1.56032	0.746174	0.730044	2.27486	5.64105
NM_001163103	Ppp1r36	H3K4me3-only	0.0344015	0.127189	0.0407844	0.0742236	0.189125	0.236096	0.450081	0.356247	1.88643	0.245546	1.10941	2.4588	2.77883	3.70964	3.37233	0.0927875	0.0063829	0.0398221	0.154723	0.201694	0.415679	0.321846
NM_024414	Stx1b	H3K4me3-only	0.0515721	0.122871	0.0245981	0.0262985	0.0466123	0.13579	0.175584	0.530571	1.25248	-1.06804	-0.97161	-0.14588	1.39671	1.7675	3.36288	0.0712989	-0.026974	-0.0252736	-0.0049598	0.0842179	0.124012	0.478999
NM_011063	Pea15a	H3K4me3-only	0.783015	0.588552	1.6695	3.29014	6.60206	10.3947	9.96793	8.03589	-0.41187	1.0923	2.07104	3.0758	3.73066	3.67018	3.35935	-0.194463	0.886485	2.50713	5.81905	9.61168	9.18492	7.25288
NM_001081062	Ccno	H3K4me3-only	0.440113	1.81628	0.63645	1.37442	12.9292	16.9916	11.0166	4.49402	2.04504	0.532173	1.64288	4.87662	5.2708	4.64566	3.35206	1.37617	0.196337	0.934307	12.4891	16.5515	10.5765	4.05391
NM_019972	Sort1	H3K4me3-only	1.02437	0.805143	0.815133	0.651944	1.23262	1.76532	6.09383	10.4552	-0.34742	-0.32963	-0.651917	0.266991	0.785193	2.57261	3.35141	-0.219227	-0.209237	-0.372426	0.20825	0.74095	5.06946	9.43083
NM_001085371	Speg	H3K4me3-only	0.100703	0.0247273	0.202119	0.168375	0.167075	0.421519	0.750938	1.02532	-2.02593	1.0051	0.741571	0.730389	2.06549	2.89859	3.3479	-0.0759757	0.101416	0.067672	0.066372	0.320816	0.650235	0.924617
NM_175136	Rnf122	H3K4me3-only	0.294746	0.274267	0.421756	0.433927	0.72933	1.3824	2.41193	2.98661	-0.103891	0.516936	0.55798	1.3071	2.22963	3.03264	3.34096	-0.020479	0.12701	0.139181	0.434584	1.08765	2.11718	2.69186
NR_015464	A330069E16Rik	H3K4me3-only	0.234737	0.376027	0.490433	0.628145	0.460336	0.918451	1.57542	2.36189	0.679791	1.06301	1.42005	0.971642	1.96816	2.74662	3.33082	0.14129	0.255696	0.393408	0.225599	0.683714	1.34068	2.12715
NM_010894	Neurod1	H3K4me3-only	0.163935	0.0956597	0.220842	0.627922	1.15528	1.48828	1.75414	1.6455	-0.777141	0.429891	1.93746	2.81705	3.18245	3.41957	3.32733	-0.0682753	0.056907	0.463987	0.991345	1.32435	1.59021	1.48157
NM_013470	Anxa3	H3K4me3-only	0.373621	0.490065	7.75618	5.86732	2.99179	0.755654	0.865123	3.74809	0.391398	4.3757	3.97305	3.00136	1.01615	1.21133	3.32651	0.116444	7.38256	5.4937	2.61817	0.382033	0.491502	3.37447
NR_045046	2610035F20Rik	H3K4me3-only	0.0758902	0.215713	0.255226	0.378484	0.574814	0.327014	0.3366	0.755321	1.50713	1.74979	2.31825	2.92111	2.10737	2.14905	3.3151	0.139823	0.179336	0.302594	0.498924	0.251124	0.26071	0.679431
NM_201639	Synm	H3K4me3-only	0.197773	0.125264	0.0677246	0.149824	0.161053	0.321722	0.74187	1.9607	-0.658874	-1.54609	-0.400577	-0.29631	0.701969	1.90732	3.30945	-0.072509	-0.130048	-0.047949	-0.03672	0.123949	0.544097	1.76293
NM_001040459	Shroom4	H3K4me3-only	0.341306	0.39482	1.29621	1.65848	2.89044	4.53114	4.43159	3.37508	0.210129	1.92516	2.28072	3.08215	3.73074	3.69869	3.30578	0.053514	0.954904	1.31717	2.54913	4.18983	4.09028	3.03377
NM_008909	Ppl	H3K4me3-only	0.206804	0.356163	0.34351	0.161218	0.254354	0.273619	0.760829	2.02464	0.784274	0.732088	-0.359251	0.298574	0.403904	1.87931	3.29133	0.149359	0.136706	-0.045586	0.04755	0.066815	0.554025	1.81784
NM_001271599	Sort1	H3K4me3-only	0.367128	0.511195	0.403322	0.322596	0.34981	1.18065	1.87125	3.57343	0.477591	0.135649	-0.186555	-0.0697116	1.68523	2.34965	3.28295	0.144067	0.036194	-0.044532	-0.017318	0.813522	1.50412	3.2063
NM_133979	Ano10	H3K4me3-only	0.619256	0.566271	0.238261	0.302024	0.715366	0.372131	1.24917	6.02681	-0.129043	-1.37799	-1.03587	0.208146	-0.734725	1.01236	3.28279	-0.052985	-0.380995	-0.317232	0.09611	-0.247125	0.629914	5.40755
NM_011517	Sycp3	H3K4me3-only	5.58423	11.0716	7.39764	3.16847	6.05231	7.36627	19.6314	54.3387	0.987433	0.405707	-0.817572	0.116128	0.399576	1.81373	3.28255	5.48737	1.81341	-2.41576	0.46808	1.78204	14.0472	48.7545
NM_016701	Nes	H3K4me3-only	2.59157	3.45609	4.80721	2.65566	1.30897	2.12717	7.25363	25.1279	0.415314	0.891373	0.0352441	-0.985394	-0.284891	1.48488	3.27739	0.86452	2.21564	0.06409	-1.2826	-0.4644	4.66206	22.5363
NM_206882	Hist3h2bb-ps	H3K4me3-only	5.40793	2.98942	7.55129	4.71907	9.20826	20.2728	51.5921	52.2225	-0.855211	0.481647	-0.196574	0.767852	1.9064	3.254	3.27152	-2.41851	2.14336	-0.68886	3.80033	14.8649	46.1842	46.8146
NM_010570	Irs1	H3K4me3-only	0.442385	0.234523	0.259488	0.0925925	0.0867716	0.250708	0.971443	4.20786	-0.915573	-0.769635	-2.25634	-2.35001	-0.819294	1.13483	3.24971	-0.207862	-0.182897	-0.349792	-0.355613	-0.191677	0.529058	3.76548
NM_030021	D730039F16Rik	H3K4me3-only	0.0281483	0.0282652	0.145659	0.049513	0.0218913	0.0316572	0.132749	0.267642	0.00597911	2.37148	0.81476	-0.36269	0.169486	2.23758	3.24918	0.0001169	0.117511	0.0213647	-0.006257	0.0035089	0.104601	0.239494
NM_010487	Elavl3	H3K4me3-only	0.0873004	0.0860544	0.0378031	0.106439	0.185142	0.314605	0.685565	0.828276	-0.0207393	-1.20748	0.285967	1.08457	1.84948	2.97323	3.24605	-0.001246	-0.0494973	0.0191386	0.0978416	0.227305	0.598265	0.740976
NM_001033254	Pak6	H3K4me3-only	0.067702	0.0488911	0.0543607	0.48714	0.555637	0.8867	1.36754	0.641615	-0.469627	-0.316634	2.84707	3.03687	3.71118	4.33624	3.24444	-0.0188109	-0.0133413	0.419438	0.487935	0.818998	1.29984	0.573913
NM_001081033	Pde11a	H3K4me3-only	0.0440081	0.0610361	0.0719465	0.100744	0.0344058	0.0689503	0.123429	0.40873	0.471894	0.709155	1.19485	-0.355117	0.647788	1.48784	3.21531	0.017028	0.0279384	0.0567359	-0.0096023	0.0249422	0.0794209	0.364722
NM_001081212	Irs2	H3K4me3-only	1.68448	3.76279	2.90267	1.56484	1.49164	3.88446	5.90215	15.5626	1.1595	0.785077	-0.106288	-0.175404	1.20541	1.80894	3.20771	2.07831	1.21819	-0.11964	-0.19284	2.19998	4.21767	13.8781
NM_176959	Fbxl7	H3K4me3-only	0.0462222	0.0826933	0.0998662	0.0604095	0.119317	0.144864	0.232997	0.425844	0.839185	1.11141	0.38619	1.36814	1.64804	2.33365	3.20367	0.0364711	0.053644	0.0141873	0.0730948	0.0986418	0.186775	0.379622
NM_178254	Tcfl5	H3K4me3-only	3.46202	3.62549	4.87005	7.60861	17.7195	22.5135	27.5971	31.786	0.0665619	0.492323	1.13602	2.35565	2.7011	2.99483	3.19871	0.16347	1.40803	4.14659	14.2575	19.0515	24.1351	28.324
NM_175116	Lpar6	H3K4me3-only	2.00731	5.70228	10.8297	6.54498	7.18873	4.61978	4.47899	18.3883	1.50628	2.43166	1.70513	1.84047	1.20256	1.15791	3.19545	3.69497	8.82239	4.53767	5.18142	2.61247	2.47168	16.381
NM_008935	Prom1	H3K4me3-only	2.62529	1.4638	0.805123	0.790558	2.55435	5.8537	12.3514	24.0375	-0.842758	-1.7052	-1.73153	-0.0395206	1.15687	2.23413	3.19474	-1.16149	-1.82017	-1.83473	-0.07094	3.22841	9.72611	21.4122
NM_146189	Mybpc2	H3K4me3-only	0.0737908	0.0792083	0.0706813	0.413151	1.09385	0.83849	0.800435	0.672973	0.102211	-0.0621124	2.48516	3.88983	3.50628	3.43927	3.18904	0.0054175	-0.0031095	0.33936	1.02006	0.764699	0.726644	0.599182
NM_021451	Pmaip1	H3K4me3-only	1.87813	7.85119	14.8357	11.0563	20.0812	30.1615	43.2528	17.1143	2.06361	2.9817	2.5575	3.41848	4.00534	4.52542	3.18783	5.97306	12.9576	9.17817	18.2031	28.2834	41.3747	15.2362
NM_001045484	Mef2b	H3K4me3-only	0.659353	0.580308	1.71862e-05	0.221381	0.000153646	0.50918	4.91651	6.00737	-0.184232	-15.2275	-1.57452	-12.0672	-0.372875	2.89851	3.18761	-0.079045	-0.659336	-0.437972	-0.659199	-0.150173	4.25716	5.34802
NM_019967	Dbc1	H3K4me3-only	0.05395	0.108203	0.0962566	0.141878	0.140793	0.235889	0.472521	0.490866	1.00405	0.835263	1.39496	1.38388	2.12841	3.13068	3.18563	0.054253	0.0423066	0.087928	0.086843	0.181939	0.418571	0.436916
NM_178715	Tmem30b	H3K4me3-only	0.371703	0.469617	0.321918	0.160848	0.448289	1.65567	2.59855	3.34115	0.337334	-0.207457	-1.20845	0.270279	2.15519	2.80548	3.16812	0.097914	-0.049785	-0.210855	0.076586	1.28397	2.22685	2.96945
NM_016875	Ybx2	H3K4me3-only	0.534014	0.409051	0.267154	0.285423	0.496899	0.714216	2.22226	4.77493	-0.384597	-0.999206	-0.903776	-0.103925	0.419483	2.05708	3.16053	-0.124963	-0.26686	-0.248591	-0.037115	0.180202	1.68825	4.24092
NM_001047604	Ttc21b	H3K4me3-only	1.79331	1.06343	1.06586	1.51296	3.40604	6.7115	10.4206	15.9529	-0.7539	-0.750607	-0.245251	0.92547	1.90401	2.53874	3.15312	-0.72988	-0.72745	-0.28035	1.61273	4.91819	8.62729	14.1596
NM_177284	Nrxn1	H3K4me3-only	0.0222874	0.0229612	0.0394158	0.064862	0.477207	0.724895	0.194259	0.19822	0.0429697	0.822546	1.54115	4.42031	5.02347	3.12368	3.1528	0.0006738	0.0171284	0.0425746	0.45492	0.702608	0.171972	0.175933
NM_153537	Phldb1	H3K4me3-only	0.437304	0.53006	8.58135	4.27298	1.45302	1.30154	2.82699	3.88527	0.277519	4.2945	3.28853	1.73235	1.57351	2.69256	3.15131	0.092756	8.14405	3.83568	1.01572	0.864236	2.38969	3.44797
NM_016691	Clcn5	H3K4me3-only	0.588802	0.967393	0.562315	0.173839	0.362833	0.617907	3.90807	5.21034	0.71632	-0.066404	-1.76003	-0.698477	0.0696071	2.7306	3.14552	0.378591	-0.026487	-0.414963	-0.225969	0.029105	3.31927	4.62154
NM_001111311	Lrrfip1	H3K4me3-only	1.12065	1.33313	4.42065	1.86713	3.80418	4.41174	7.73844	9.82557	0.250482	1.97992	0.736487	1.76325	1.97701	2.78771	3.13221	0.21248	3.3	0.74648	2.68353	3.29109	6.61779	8.70492
NM_029798	Flywch2	H3K4me3-only	1.92257	1.18055	0.897356	1.28532	4.15987	5.99125	12.6036	16.7006	-0.703577	-1.09928	-0.580909	1.1135	1.63982	2.71273	3.11879	-0.74202	-1.02521	-0.63725	2.2373	4.06868	10.681	14.778
NM_013819	H2-M3	H3K4me3-only	0.136043	0.21072	0.317421	0.243243	0.922015	1.44446	2.10194	1.17773	0.631265	1.22233	0.838336	2.76073	3.4084	3.94959	3.11387	0.074677	0.181378	0.1072	0.785972	1.30842	1.9659	1.04169
NM_172775	Plxnb1	H3K4me3-only	0.684952	0.42067	1.29188	1.70883	2.33318	4.70387	5.1254	5.92743	-0.703314	0.915397	1.31893	1.76822	2.77977	2.90359	3.11333	-0.264282	0.606928	1.02388	1.64823	4.01892	4.44045	5.24248
NM_008343	Igfbp3	H3K4me3-only	1.83873	3.47646	6.16517	3.55878	3.52736	2.66416	7.7565	15.9038	0.918909	1.74543	0.952673	0.939879	0.534971	2.0767	3.11259	1.63773	4.32644	1.72005	1.68863	0.82543	5.91777	14.0651
NM_007599	Capg	H3K4me3-only	3.13193	3.01472	7.89015	7.67149	5.99444	5.26913	17.4558	27.0567	-0.055028	1.333	1.29245	0.936573	0.750513	2.47858	3.11086	-0.11721	4.75822	4.53956	2.86251	2.1372	14.3239	23.9248
NM_177638	Crb3	H3K4me3-only	4.16707	1.63083	0.877115	0.939199	2.25946	3.90543	15.9733	35.7813	-1.35343	-2.2482	-2.14953	-0.883055	-0.0935519	1.93856	3.1021	-2.53624	-3.28995	-3.22787	-1.90761	-0.26164	11.8062	31.6142
NM_001033954	Calca	H3K4me3-only	1.23338	0.7592	0.422942	2.01949	10.953	9.42426	22.1431	10.5225	-0.700065	-1.54409	0.711374	3.15064	2.93376	4.16617	3.09279	-0.47418	-0.810438	0.78611	9.71962	8.19088	20.9097	9.28912
NM_138752	Plekhg2	H3K4me3-only	0.66797	0.855056	0.834372	0.768366	0.375042	1.03766	0.902681	5.64366	0.356236	0.320907	0.20201	-0.832731	0.635479	0.434433	3.07878	0.187086	0.166402	0.100396	-0.292928	0.36969	0.234711	4.97569
NM_001034881	Gm5464	H3K4me3-only	0.0771884	0.116702	0.213501	0.192492	0.19497	0.217059	0.238199	0.650665	0.596373	1.46779	1.31834	1.3368	1.49163	1.62571	3.07546	0.0395136	0.136313	0.115304	0.117782	0.139871	0.161011	0.573477
NM_172463	Sned1	H3K4me3-only	0.248246	0.15215	1.64855	3.50771	4.22355	3.99719	3.0689	2.08682	-0.706276	2.73136	3.82069	4.08861	4.00914	3.62788	3.07146	-0.096096	1.4003	3.25946	3.9753	3.74894	2.82065	1.83857
NM_018738	Igtp	H3K4me3-only	0.301273	0.230923	0.0706283	0.195264	1.77346	4.76895	4.05641	2.52989	-0.38366	-2.09275	-0.625645	2.55742	3.98453	3.75106	3.06993	-0.07035	-0.230645	-0.106009	1.47219	4.46768	3.75514	2.22862
NM_029555	Gstk1	H3K4me3-only	0.723466	0.939076	1.19628	1.08719	1.51519	1.03717	2.5358	6.07212	0.376317	0.725558	0.587607	1.0665	0.519655	1.80944	3.0692	0.21561	0.472814	0.363724	0.791724	0.313704	1.81233	5.34865
NM_053253	Zmynd10	H3K4me3-only	0.0860989	0.0195819	0	0.0186465	0.035773	0.012232	0.190232	0.722196	-2.13647	-10	-2.20709	-1.26712	-2.81533	1.14369	3.06832	-0.066517	-0.0860989	-0.0674524	-0.0503259	-0.0738669	0.104133	0.636097
NM_172397	Limd2	H3K4me3-only	2.73124	2.71015	1.91024	2.86968	6.44034	6.88099	14.8587	22.8611	-0.0111834	-0.515802	0.0713338	1.23758	1.33306	2.44368	3.06527	-0.02109	-0.821	0.13844	3.7091	4.14975	12.1275	20.1299
NM_001083114	Pphln1	H3K4me3-only	2.96302	3.07678	2.59613	2.03597	3.68161	19.9253	20.2766	24.7013	0.0543529	-0.190706	-0.541352	0.313268	2.74946	2.77468	3.05945	0.11376	-0.36689	-0.92705	0.71859	16.9623	17.3136	21.7383
NM_016762	Matn2	H3K4me3-only	0.145053	0.130942	0.221608	0.336721	0.764015	0.90458	1.19104	1.20782	-0.147652	0.61143	1.21497	2.39702	2.64067	3.03757	3.05775	-0.014111	0.076555	0.191668	0.618962	0.759527	1.04599	1.06277
NM_001163630	Satb1	H3K4me3-only	0.473665	0.321431	0.224493	0.226327	0.393738	0.917321	2.25458	3.93578	-0.559358	-1.0772	-1.06546	-0.266631	0.95356	2.25092	3.05471	-0.152234	-0.249172	-0.247338	-0.079927	0.443656	1.78091	3.46211
NM_009305	Syp	H3K4me3-only	0.132665	0.0965028	0.247882	0.210639	0.256537	0.227564	0.319875	1.07501	-0.459145	0.901866	0.666985	0.951379	0.778485	1.26972	3.01849	-0.0361622	0.115217	0.077974	0.123872	0.094899	0.18721	0.942345
NM_010111	Efnb2	H3K4me3-only	0.651568	1.15898	1.84032	4.34587	11.7216	12.5357	8.37045	5.27304	0.830868	1.49797	2.73766	4.16911	4.26598	3.68332	3.01665	0.507412	1.18875	3.6943	11.07	11.8841	7.71888	4.62147
NM_013603	Mt3	H3K4me3-only	0.255544	0.243372	0.486665	1.8047	3.96188	7.74559	8.92361	2.06308	-0.0704085	0.929357	2.82012	3.95454	4.92173	5.12598	3.01316	-0.012172	0.231121	1.54916	3.70634	7.49005	8.66807	1.80754
NM_007606	Car3	H3K4me3-only	0.188593	0.318929	1.20459	1.90515	2.53063	4.13898	2.30378	1.51664	0.757959	2.67519	3.33656	3.74615	4.45593	3.61065	3.00753	0.130336	1.016	1.71656	2.34204	3.95039	2.11519	1.32805
NM_033563	Klf7	H3K4me3-only	1.193	1.27086	1.42044	1.16795	2.51537	4.44789	6.10318	9.5673	0.0912111	0.251744	-0.0306155	1.07618	1.89853	2.35497	3.00352	0.07786	0.22744	-0.02505	1.32237	3.25489	4.91018	8.3743
NM_019989	Sh3bgrl	H3K4me3-only	3.41504	3.46713	3.56537	2.55731	3.35046	4.24195	8.95319	27.3284	0.0218395	0.0621493	-0.417275	-0.0275433	0.312825	1.3905	3.00043	0.05209	0.15033	-0.85773	-0.06458	0.82691	5.53815	23.9134
NM_198865	Slitrk5	H3K4me3-only	0.145889	0.137216	0.241378	0.30607	0.273877	0.423007	0.880144	1.16685	-0.0884224	0.726423	1.06899	0.908657	1.53581	2.59287	2.99968	-0.008673	0.095489	0.160181	0.127988	0.277118	0.734255	1.02096
NM_026138	Soga3	H3K4me3-only	0.296484	0.420999	7.50367	7.21085	5.35392	5.60801	2.6182	2.33979	0.505863	4.66157	4.60414	4.17457	4.24146	3.14255	2.98035	0.124515	7.20719	6.91437	5.05744	5.31153	2.32172	2.04331
NM_001146215	Msh5	H3K4me3-only	0.12582	0.0275893	0.0178516	0.0513267	0.0257479	0	0	0.990327	-2.18918	-2.81724	-1.29358	-2.28883	-10	-10	2.97654	-0.0982307	-0.107968	-0.0744933	-0.100072	-0.12582	-0.12582	0.864507
NM_001038602	Marveld2	H3K4me3-only	0.667969	1.14983	2.43568	0.986382	1.19875	1.54847	2.8136	5.19671	0.783568	1.86647	0.562365	0.843678	1.21299	2.07456	2.95975	0.481861	1.76771	0.318413	0.530781	0.880501	2.14563	4.52874
NM_001033550	Lrrc8b	H3K4me3-only	0.542697	0.62876	0.54197	0.288263	0.277881	0.422397	1.2713	4.22112	0.212363	-0.00193394	-0.912761	-0.96568	-0.361547	1.22809	2.95941	0.086063	-0.000727	-0.254434	-0.264816	-0.1203	0.728603	3.67842
NM_023196	Pla2g12a	H3K4me3-only	2.84004	2.24314	1.63876	2.52441	7.55265	12.3419	26.8827	21.8256	-0.340392	-0.793307	-0.169965	1.41107	2.11958	3.24269	2.94204	-0.5969	-1.20128	-0.31563	4.71261	9.50186	24.0427	18.9856
NM_019686	Cib2	H3K4me3-only	0.267697	0.353871	0.378871	0.198153	1.43058	0.966243	1.47864	2.05632	0.402623	0.501106	-0.433986	2.41793	1.85179	2.4656	2.94139	0.086174	0.111174	-0.069544	1.16288	0.698546	1.21094	1.78862
NM_172696	Inadl	H3K4me3-only	0.659354	0.841376	0.821935	0.709265	0.443105	0.757768	2.1467	5.05641	0.351697	0.317971	0.105272	-0.573405	0.200703	1.703	2.93899	0.182022	0.162581	0.049911	-0.216249	0.098414	1.48735	4.39706
NM_001030296	Prr7	H3K4me3-only	0.15616	0.196462	0.263502	0.350803	0.349828	0.672563	1.58777	1.19694	0.331225	0.754789	1.16764	1.16362	2.10664	3.34591	2.93825	0.040302	0.107342	0.194643	0.193668	0.516403	1.43161	1.04078
NR_045290	4732491K20Rik	H3K4me3-only	0.0477328	0.0573354	0.0610549	0.0827124	0.0590658	0.0755802	0.293404	0.365851	0.264445	0.355126	0.793123	0.307342	0.663027	2.61984	2.9382	0.0096026	0.0133221	0.0349796	0.011333	0.0278474	0.245671	0.318118
NM_144549	Trib1	H3K4me3-only	1.12702	1.24434	6.64402	6.77742	6.11116	4.44033	4.72173	8.59455	0.142868	2.55954	2.58822	2.43893	1.97815	2.0668	2.93091	0.11732	5.517	5.6504	4.98414	3.31331	3.59471	7.46753
NM_133969	Cyp4v3	H3K4me3-only	0.0350431	0.0299122	0.0409992	0.0456222	0.023476	0.0116442	0.0620954	0.266569	-0.228396	0.226465	0.380606	-0.577944	-1.58952	0.825356	2.92731	-0.0051309	0.0059561	0.0105791	-0.0115671	-0.0233989	0.0270523	0.231526
NM_025951	Pi4k2b	H3K4me3-only	3.32321	4.06854	3.36616	4.4683	9.25457	11.2962	18.7384	25.1126	0.291934	0.0185263	0.427149	1.47759	1.76519	2.49535	2.91776	0.74533	0.04295	1.14509	5.93136	7.97299	15.4152	21.7894
NM_001025438	Camk2d	H3K4me3-only	0.304377	0.482488	0.45059	0	0.161681	0.193774	0.698495	2.28845	0.664634	0.565956	-10	-0.912709	-0.651484	1.19839	2.91044	0.178111	0.146213	-0.304377	-0.142696	-0.110603	0.394118	1.98407
NM_178747	Gulo	H3K4me3-only	0.608189	0.607018	0.64246	0.433625	0.637692	0.270994	1.61963	4.55181	-0.00278043	0.0790869	-0.488072	0.0683401	-1.16626	1.41307	2.90385	-0.001171	0.034271	-0.174564	0.029503	-0.337195	1.01144	3.94362
NM_010361	Gstt2	H3K4me3-only	5.11497	1.94244	1.36308	1.09436	5.42482	16.8547	26.5635	38.2049	-1.39686	-1.90786	-2.22464	0.0848495	1.72035	2.37665	2.90096	-3.17253	-3.75189	-4.02061	0.30985	11.7397	21.4485	33.0899
NM_009678	Ap1m2	H3K4me3-only	4.5488	2.10747	1.35686	1.03773	1.09733	2.28268	12.4775	33.9277	-1.10997	-1.74521	-2.13205	-2.05149	-0.994757	1.45577	2.89891	-2.44133	-3.19194	-3.51107	-3.45147	-2.26612	7.9287	29.3789
NM_010770	Matn3	H3K4me3-only	0.354497	0.167505	0.115658	0.357732	0.829553	0.434826	1.77677	2.64077	-1.08157	-1.61591	0.0131058	1.22656	0.294665	2.32541	2.89711	-0.186992	-0.238839	0.003235	0.475056	0.080329	1.42227	2.28627
NM_016778	Bok	H3K4me3-only	1.94684	1.79297	2.3861	2.6951	6.6721	7.59392	12.727	14.3968	-0.118783	0.29352	0.469204	1.77701	1.96371	2.70869	2.88654	-0.15387	0.43926	0.74826	4.72526	5.64708	10.7802	12.45
NM_001163567	Fam102b	H3K4me3-only	0.291391	0.326793	0.673752	0.305809	0.32337	0.270103	0.977977	2.14158	0.165421	1.20926	0.0696745	0.15023	-0.109447	1.74684	2.87765	0.035402	0.382361	0.014418	0.031979	-0.021288	0.686586	1.85019
NM_010014	Dab1	H3K4me3-only	1.92385	1.40221	6.65525	8.17643	10.5315	7.50768	14.8801	14.1128	-0.456294	1.7905	2.08747	2.45264	1.96437	2.95132	2.87494	-0.52164	4.7314	6.25258	8.60765	5.58383	12.9563	12.189
NM_001005784	Inadl	H3K4me3-only	1.23528	1.12939	1.95759	0.943574	1.18835	2.90519	5.59519	9.05794	-0.129294	0.664241	-0.388631	-0.0558783	1.23379	2.17935	2.87434	-0.10589	0.72231	-0.291706	-0.04693	1.66991	4.35991	7.82266
NM_011978	Slc27a2	H3K4me3-only	6.00969	5.94957	10.37	9.30368	8.58887	8.75914	18.1855	44.0662	-0.0145052	0.787053	0.630511	0.515178	0.543499	1.59743	2.87431	-0.06012	4.36031	3.29399	2.57918	2.74945	12.1758	38.0565
NM_153143	Kctd11	H3K4me3-only	0.198353	1.42501	0.837001	0.475742	0.307939	0.46781	0.792305	1.44941	2.84483	2.07716	1.26211	0.634574	1.23785	1.99799	2.86932	1.22666	0.638648	0.277389	0.109586	0.269457	0.593952	1.25106
NR_015486	D130017N08Rik	H3K4me3-only	0.0495802	0.0201888	0.124896	0.111855	0.181143	0.22474	0.166879	0.362288	-1.29621	1.33289	1.17379	1.86929	2.18042	1.75097	2.8693	-0.0293914	0.0753158	0.0622748	0.131563	0.17516	0.117299	0.312708
NM_172673	Frmd5	H3K4me3-only	0.399464	0.427851	0.164673	0.641183	1.60589	1.21934	1.63638	2.89412	0.099043	-1.27846	0.682671	2.00724	1.60996	2.03437	2.85699	0.028387	-0.234791	0.241719	1.20643	0.819876	1.23692	2.49466
NM_026805	Svop	H3K4me3-only	0.274764	0.242051	0.0633315	0.0681548	0.0555875	0.0757897	0.179481	1.97942	-0.182882	-2.1172	-2.01131	-2.30536	-1.85812	-0.614362	2.84881	-0.032713	-0.211433	-0.206609	-0.219176	-0.198974	-0.095283	1.70466
NM_180958	Ccdc79	H3K4me3-only	0.0672203	0.0694049	0.0656929	0.0590727	0.0804845	0.0647756	0.194417	0.482678	0.0461405	-0.0331595	-0.186405	0.259814	-0.0534465	1.53219	2.84409	0.0021846	-0.0015274	-0.0081476	0.0132642	-0.0024447	0.127197	0.415458
NM_008976	Ptpn14	H3K4me3-only	1.61459	0.890313	2.66843	2.36545	2.78424	3.75011	5.95357	11.564	-0.858783	0.724823	0.550947	0.786116	1.21577	1.88259	2.8404	-0.724277	1.05384	0.75086	1.16965	2.13552	4.33898	9.94941
NM_133729	2610018G03Rik	H3K4me3-only	1.65177	2.14112	1.32701	1.07253	2.13839	3.14516	6.77457	11.7456	0.374353	-0.315834	-0.622995	0.372512	0.929121	2.03612	2.83004	0.48935	-0.32476	-0.57924	0.48662	1.49339	5.1228	10.0938
NM_001163575	Parp10	H3K4me3-only	0.702021	0.629361	0.3107	0.857274	2.40602	4.0564	5.32735	4.98831	-0.157626	-1.17599	0.288242	1.77706	2.53061	2.92383	2.82897	-0.07266	-0.391321	0.155253	1.704	3.35438	4.62533	4.28629
NM_176837	Arhgap18	H3K4me3-only	0.668987	0.761663	1.89751	0.824765	1.47179	1.72971	2.38706	4.73281	0.187175	1.50406	0.302005	1.13752	1.37048	1.83518	2.82265	0.092676	1.22852	0.155778	0.802803	1.06072	1.71807	4.06382
NR_045598	Gm15706	H3K4me3-only	0.523518	0.47951	0.722726	0.791643	1.55864	2.91577	5.62399	3.70133	-0.126678	0.46521	0.596611	1.57398	2.47757	3.42528	2.82173	-0.044008	0.199208	0.268125	1.03512	2.39225	5.10047	3.17781
NR_027448	AA543186	H3K4me3-only	0.0508153	0.166023	0.176529	0.138686	0.166242	0.182097	0.210553	0.359196	1.70805	1.79657	1.44849	1.70995	1.84137	2.05085	2.82144	0.115208	0.125714	0.0878707	0.115427	0.131282	0.159738	0.308381
NM_145833	Lin28a	H3K4me3-only	16.1855	9.45219	36.3285	63.4539	81.6217	123.602	125.184	114.247	-0.775981	1.1664	1.97101	2.33425	2.93293	2.95128	2.81938	-6.73331	20.143	47.2684	65.4362	107.416	108.998	98.0615
NM_001001883	Hecw2	H3K4me3-only	0.106476	0.135148	0.707684	0.974065	0.986225	0.327294	0.398799	0.747759	0.344012	2.73258	3.19349	3.21139	1.62006	1.90513	2.81205	0.028672	0.601208	0.867589	0.879749	0.220818	0.292323	0.641283
NM_178655	Ank2	H3K4me3-only	0.93514	1.02544	2.09024	2.0318	2.66293	2.56243	3.16888	6.5499	0.132989	1.16041	1.1195	1.50976	1.45426	1.76072	2.80822	0.0903	1.1551	1.09666	1.72779	1.62729	2.23374	5.61476
NM_008862	Pkia	H3K4me3-only	0.257835	0.325555	0.79289	0.552625	0.341334	0.30636	0.948781	1.79682	0.336453	1.62067	1.09985	0.404736	0.24878	1.87963	2.80093	0.06772	0.535055	0.29479	0.083499	0.048525	0.690946	1.53899
NM_030719	Gatsl2	H3K4me3-only	0.404362	0.432227	0.192287	0.248169	0.540414	0.858041	1.24752	2.81305	0.0961418	-1.07239	-0.704325	0.418418	1.0854	1.62534	2.79842	0.027865	-0.212075	-0.156193	0.136052	0.453679	0.843158	2.40869
NM_007759	Crabp2	H3K4me3-only	1.30788	1.86977	1.58523	6.14146	14.0751	29.9688	21.3703	8.97568	0.515631	0.277462	2.23135	3.42784	4.51816	4.03031	2.77879	0.56189	0.27735	4.83358	12.7672	28.6609	20.0624	7.6678
NM_001034894	Foxr2	H3K4me3-only	0.216124	0.0769142	0.180547	0.87845	1.70792	1.53838	1.27179	1.48255	-1.49054	-0.259485	2.0231	2.98231	2.83148	2.55693	2.77815	-0.13921	-0.035577	0.662326	1.4918	1.32226	1.05567	1.26643
NM_133942	Plekha1	H3K4me3-only	10.3918	10.4356	12.0713	14.4723	36.6993	55.6328	52.1154	71.1569	0.00606798	0.216135	0.477849	1.82031	2.42049	2.32626	2.77556	0.0438	1.6795	4.0805	26.3075	45.241	41.7236	60.7651
NM_010591	Jun	H3K4me3-only	0.958583	9.63634	0.48015	0.401786	0.404357	0.546727	2.12946	6.54052	3.32951	-0.997418	-1.25448	-1.24527	-0.810083	1.15151	2.77043	8.67776	-0.478433	-0.556797	-0.554226	-0.411856	1.17088	5.58194
NM_010112	Efs	H3K4me3-only	0.982617	0.906823	1.98489	1.93216	4.78657	9.62713	7.63791	6.66608	-0.115808	1.01436	0.975513	2.28429	3.2924	2.95848	2.76214	-0.075794	1.00227	0.949543	3.80395	8.64451	6.65529	5.68346
NM_008578	Mef2b	H3K4me3-only	1.40342	0.625403	0.325116	2.26649e-06	0.525175	0.174495	6.39188	9.49234	-1.16609	-2.10992	-19.2401	-1.41808	-3.00769	2.18729	2.75782	-0.778017	-1.0783	-1.40342	-0.878245	-1.22892	4.98846	8.08892
NM_011990	Slc7a11	H3K4me3-only	0.123765	0.116865	0.020231	0.00854731	0.0480478	0.098132	0.842292	0.835463	-0.0827605	-2.61296	-3.85599	-1.36506	-0.334808	2.76672	2.75497	-0.0069	-0.103534	-0.115218	-0.0757172	-0.025633	0.718527	0.711698
NM_013932	Ddx25	H3K4me3-only	1.09456	1.11802	1.34917	1.85513	1.88256	2.20164	4.16372	7.3617	0.030595	0.301721	0.761169	0.782345	1.00823	1.92752	2.74969	0.02346	0.25461	0.76057	0.788	1.10708	3.06916	6.26714
NM_001081114	Clip3	H3K4me3-only	0.573406	0.254614	0.257253	0.333383	0.535272	1.08479	1.93025	3.85258	-1.17125	-1.15637	-0.782376	-0.0992848	0.919787	1.75116	2.7482	-0.318792	-0.316153	-0.240023	-0.038134	0.511384	1.35684	3.27917
NM_133674	Arhgef5	H3K4me3-only	0.341985	0.332105	0.651465	0.350746	0.610707	1.65006	1.20468	2.27209	-0.0422936	0.929755	0.0364936	0.836547	2.27051	1.81665	2.73202	-0.00988	0.30948	0.008761	0.268722	1.30808	0.862695	1.9301
NM_146052	Lrrc3b	H3K4me3-only	0.144428	0.156652	0.122736	0.121805	0.28188	0.298467	0.903868	0.957349	0.117213	-0.234792	-0.245777	0.964731	1.04722	2.64576	2.72869	0.012224	-0.021692	-0.022623	0.137452	0.154039	0.75944	0.812921
NM_011158	Prkar2b	H3K4me3-only	0.943964	0.799443	0.563762	0.610961	1.61131	1.46612	2.97969	6.25235	-0.239737	-0.743646	-0.627652	0.77143	0.635199	1.65836	2.72759	-0.144521	-0.380202	-0.333003	0.667346	0.522156	2.03573	5.30839
NM_008426	Kcnj3	H3K4me3-only	0.733141	0.576952	1.3495	1.90719	3.43727	3.12592	2.79698	4.79173	-0.345639	0.880262	1.37929	2.2291	2.09212	1.93171	2.70838	-0.156189	0.616359	1.17405	2.70413	2.39278	2.06384	4.05859
NM_001114087	Pdlim7	H3K4me3-only	1.62852	1.93308	1.67917	1.65954	2.87145	2.93566	4.07862	10.6418	0.24734	0.0441869	0.027222	0.818218	0.850123	1.32452	2.70811	0.30456	0.05065	0.03102	1.24293	1.30714	2.4501	9.01328
NM_016711	Tmod2	H3K4me3-only	0.280896	0.480116	0.783691	0.466026	0.473396	0.813359	0.951278	1.82573	0.773347	1.48025	0.730374	0.753011	1.53386	1.75983	2.70037	0.19922	0.502795	0.18513	0.1925	0.532463	0.670382	1.54483
NM_183315	Ctxn1	H3K4me3-only	0.482755	0.851589	0.749841	1.72066	2.18058	2.66633	3.92352	3.11727	0.818866	0.635294	1.8336	2.17535	2.46549	3.02279	2.69092	0.368834	0.267086	1.23791	1.69782	2.18357	3.44076	2.63451
NM_001077595	Shroom3	H3K4me3-only	1.24658	1.16947	6.22358	4.9686	3.66072	4.30587	4.43014	7.96273	-0.0921206	2.31977	1.99486	1.55415	1.78833	1.82938	2.67529	-0.07711	4.977	3.72202	2.41414	3.05929	3.18356	6.71615
NM_198438	Ssbp3	H3K4me3-only	1.27982	0.924505	1.31424	1.58503	3.94295	10.9932	7.74505	8.10046	-0.469188	0.0382878	0.308569	1.62333	3.1026	2.59733	2.66206	-0.355315	0.03442	0.30521	2.66313	9.71338	6.46523	6.82064
NM_177915	Igsf1	H3K4me3-only	0.198147	0.141653	0.0674008	0.163982	0.443185	0.481433	0.992043	1.25295	-0.48421	-1.55573	-0.273034	1.16134	1.28076	2.32383	2.66069	-0.056494	-0.130746	-0.034165	0.245038	0.283286	0.793896	1.0548
NM_001081129	Cntnap3	H3K4me3-only	0.0694992	0.271309	0.185462	0.142875	0.0771981	0.0380538	0.159617	0.439208	1.96487	1.41606	1.03969	0.151569	-0.868956	1.19955	2.65984	0.20181	0.115963	0.0733758	0.0076989	-0.0314454	0.0901178	0.369709
NM_144551	Trib2	H3K4me3-only	0.520542	0.157509	0.805438	1.00887	2.57938	2.81009	2.30317	3.28797	-1.72458	0.629759	0.954654	2.30894	2.43253	2.14553	2.65911	-0.363033	0.284896	0.488328	2.05884	2.28955	1.78263	2.76743
NM_001267846	Fign	H3K4me3-only	0.0797928	0.115974	0.136689	0.0823406	0.111783	0.229575	0.392988	0.503626	0.539471	0.776567	0.0453454	0.48637	1.52464	2.30015	2.65802	0.0361812	0.0568962	0.0025478	0.0319902	0.149782	0.313195	0.423833
NM_207681	Bcl2l11	H3K4me3-only	0.617797	0.492266	1.02443	1.29523	2.12511	2.86261	2.59595	3.89673	-0.327695	0.729617	1.068	1.78233	2.21213	2.07106	2.65706	-0.125531	0.406633	0.677433	1.50731	2.24481	1.97815	3.27893
NM_001128086	Anks1b	H3K4me3-only	0.105298	0.0566435	0.0382985	0.0874874	0.211676	0.23572	0.403265	0.659125	-0.894496	-1.45912	-0.267331	1.00738	1.1626	1.93725	2.64607	-0.0486545	-0.0669995	-0.0178106	0.106378	0.130422	0.297967	0.553827
NM_153392	Ttc39a	H3K4me3-only	0.505227	0.589914	0.456784	0.358962	0.378122	0.261529	1.07481	3.15908	0.223573	-0.14542	-0.493101	-0.41808	-0.949961	1.08908	2.6445	0.084687	-0.048443	-0.146265	-0.127105	-0.243698	0.569583	2.65385
NM_027870	Armcx3	H3K4me3-only	0.301425	0.225824	0.0789842	0.0778422	0.301226	0.587736	1.00021	1.88293	-0.4166	-1.93216	-1.95317	-0.000952778	0.963369	1.73043	2.64311	-0.075601	-0.222441	-0.223583	-0.000199	0.286311	0.698785	1.5815
NM_001244916	Sall2	H3K4me3-only	1.42256	0.831052	1.43327	2.26313	4.42135	12.4416	11.6099	8.86707	-0.775479	0.0108209	0.66983	1.636	3.12861	3.02879	2.63997	-0.591508	0.01071	0.84057	2.99879	11.019	10.1873	7.44451
NM_011055	Pde3b	H3K4me3-only	1.05494	1.48273	2.21733	1.45325	2.64671	3.24139	5.12408	6.56806	0.491095	1.07166	0.462122	1.32704	1.61945	2.28013	2.63831	0.42779	1.16239	0.39831	1.59177	2.18645	4.06914	5.51312
NM_008873	Plau	H3K4me3-only	0.0839093	0.0841401	0.100229	0.0306703	0.167318	0.241368	0.401514	0.520516	0.00396281	0.256397	-1.45199	0.99569	1.52433	2.25855	2.63304	0.0002308	0.0163197	-0.053239	0.0834087	0.157459	0.317605	0.436607
NM_013640	Psmb10	H3K4me3-only	3.03216	2.27612	3.41253	7.03674	19.6096	40.6183	51.0916	18.7656	-0.413769	0.170496	1.21456	2.69314	3.74371	4.07467	2.62967	-0.75604	0.38037	4.00458	16.5774	37.5861	48.0594	15.7334
NM_001252095	Mettl20	H3K4me3-only	1.03566	0.951158	2.38164	2.77441	4.06311	4.37201	5.54659	6.34371	-0.122794	1.2014	1.42163	1.97203	2.07775	2.42105	2.61478	-0.084502	1.34598	1.73875	3.02745	3.33635	4.51093	5.30805
NM_138956	Rassf3	H3K4me3-only	2.25052	1.85979	3.76399	3.92774	6.67339	10.3206	12.5003	13.7488	-0.275119	0.742004	0.803441	1.56816	2.1972	2.47363	2.61098	-0.39073	1.51347	1.67722	4.42287	8.07008	10.2498	11.4983
NM_001001892	H2-K1	H3K4me3-only	5.18478	6.99777	4.09737	3.83585	7.26443	8.24872	30.6961	31.6491	0.432612	-0.339585	-0.434736	0.486567	0.669887	2.5657	2.60981	1.81299	-1.08741	-1.34893	2.07965	3.06394	25.5113	26.4643
NM_011206	Ptpn18	H3K4me3-only	0.262738	0.340762	0.297445	0.400169	1.10022	1.44215	1.4486	1.60095	0.37514	0.178998	0.606985	2.0661	2.45652	2.46296	2.60723	0.078024	0.034707	0.137431	0.837482	1.17941	1.18586	1.33821
NM_010590	Ajuba	H3K4me3-only	11.1638	20.4076	45.356	43.3522	50.7114	47.122	54.3598	67.9674	0.870278	2.02247	1.95728	2.18348	2.07757	2.28371	2.60601	9.2438	34.1922	32.1884	39.5476	35.9582	43.196	56.8036
NM_146040	Cdca7l	H3K4me3-only	4.4513	3.98796	5.25561	8.73161	14.3785	19.923	25.5002	27.0448	-0.158576	0.239631	0.972021	1.69161	2.16214	2.51821	2.60305	-0.46334	0.80431	4.28031	9.9272	15.4717	21.0489	22.5935
NM_138653	Bspry	H3K4me3-only	2.00889	1.30768	1.99735	1.75401	2.52902	5.96424	11.2574	12.2011	-0.619389	-0.00831141	-0.195742	0.33218	1.56994	2.4864	2.60254	-0.70121	-0.01154	-0.25488	0.52013	3.95535	9.24851	10.1922
NM_010218	Fjx1	H3K4me3-only	0.825273	3.84652	6.94441	5.36167	9.50548	5.08217	5.34869	5.00997	2.22061	3.07291	2.69974	3.52582	2.6225	2.69624	2.60186	3.02125	6.11914	4.5364	8.68021	4.2569	4.52342	4.1847
NR_003188	Kis2	H3K4me3-only	1.96443	0.918092	1.51056	3.91702	5.94652	8.55968	7.41841	11.9087	-1.0974	-0.379027	0.995646	1.59793	2.12345	1.917	2.59983	-1.04634	-0.45387	1.95259	3.98209	6.59525	5.45398	9.94427
NM_011674	Ugt8a	H3K4me3-only	0.772405	1.27802	1.49445	0.883528	1.1423	1.36457	2.19061	4.65882	0.726481	0.952185	0.193918	0.564512	0.821017	1.5039	2.59254	0.505615	0.722045	0.111123	0.369895	0.592165	1.4182	3.88642
NM_010930	Nov	H3K4me3-only	0.0790631	0.0464597	0.0709672	0.438342	0.793903	0.410768	0.523815	0.475892	-0.767025	-0.155852	2.47098	3.32789	2.37725	2.72798	2.58956	-0.0326034	-0.0080959	0.359279	0.71484	0.331705	0.444752	0.396829
NM_008756	Ocln	H3K4me3-only	1.77039	2.44871	1.55336	1.34123	2.29979	2.23708	5.67388	10.5865	0.467955	-0.188675	-0.400511	0.377435	0.33755	1.68027	2.58009	0.67832	-0.21703	-0.42916	0.5294	0.46669	3.90349	8.81611
NM_029881	Tmem200a	H3K4me3-only	0.388035	0.218204	0.37403	0.097367	0.216758	0.300829	1.01753	2.31253	-0.830509	-0.0530328	-1.99468	-0.840102	-0.367243	1.39081	2.57521	-0.169831	-0.014005	-0.290668	-0.171277	-0.087206	0.629495	1.9245
NM_178755	Agbl2	H3K4me3-only	0.105175	0.110459	0.148226	0.173427	0.136274	0.0489792	0.17586	0.626721	0.0707192	0.495007	0.721537	0.373719	-1.10255	0.741636	2.57503	0.005284	0.043051	0.068252	0.031099	-0.0561958	0.070685	0.521546
NM_001170694	Rcbtb2	H3K4me3-only	2.66546	2.73077	3.73528	4.63775	5.40692	5.92239	9.56467	15.8078	0.0349233	0.486832	0.799041	1.02042	1.15179	1.84333	2.56818	0.06531	1.06982	1.97229	2.74146	3.25693	6.89921	13.1423
NM_001109989	Nrep	H3K4me3-only	0.844098	0.57465	0.785077	0.000152578	1.56072	0.861939	2.4952	4.99768	-0.554727	-0.104576	-12.4336	0.886729	0.0301753	1.56367	2.56578	-0.269448	-0.059021	-0.843945	0.716622	0.017841	1.6511	4.15358
NM_175271	Lpar4	H3K4me3-only	0.762727	0.741911	2.18981	2.42722	2.45228	2.28441	2.27548	4.49796	-0.0399206	1.52157	1.67007	1.68489	1.58258	1.57693	2.56003	-0.020816	1.42708	1.66449	1.68955	1.52168	1.51275	3.73523
NM_175561	Pcnxl2	H3K4me3-only	0.0500242	0.090706	0.265707	0.480687	0.818847	0.672559	0.331234	0.293109	0.858572	2.40914	3.2644	4.0329	3.74896	2.72715	2.55074	0.0406818	0.215683	0.430663	0.768823	0.622535	0.28121	0.243085
NM_017469	Gucy1b3	H3K4me3-only	0.0576112	0.099149	0.228167	0.0928953	9.82175e-05	0.0921134	0.311322	0.33753	0.783249	1.98567	0.689256	-9.19615	0.677062	2.43399	2.55059	0.0415378	0.170556	0.0352841	-0.057513	0.0345022	0.253711	0.279919
NM_025638	Gdpd1	H3K4me3-only	0.602113	1.04397	0.543112	0.242776	0.246588	0.237719	1.76277	3.52193	0.793974	-0.148785	-1.31041	-1.28793	-1.34078	1.54974	2.54826	0.441857	-0.059001	-0.359337	-0.355525	-0.364394	1.16066	2.91982
NM_175408	Tmem139	H3K4me3-only	0.271694	0.155072	0.221695	0.245132	0.394357	0.244031	0.63919	1.58495	-0.809044	-0.293406	-0.148424	0.53752	-0.154918	1.23426	2.54438	-0.116622	-0.049999	-0.026562	0.122663	-0.027663	0.367496	1.31326
NM_146015	Efemp1	H3K4me3-only	0.681615	0.6637	0.512339	0.358688	0.308453	0.65477	1.70407	3.96983	-0.0384258	-0.411858	-0.926228	-1.14391	-0.0579689	1.32196	2.54205	-0.017915	-0.169276	-0.322927	-0.373162	-0.026845	1.02245	3.28822
NM_029770	Unc5b	H3K4me3-only	3.05343	1.65196	2.74463	3.62626	6.90324	14.1979	14.5159	17.7629	-0.886252	-0.153819	0.248052	1.17684	2.21717	2.24913	2.54036	-1.40147	-0.3088	0.57283	3.84981	11.1445	11.4625	14.7095
NM_001112796	Bicd1	H3K4me3-only	0.331685	0.807282	0.654194	0.637477	0.693698	1.08837	1.34207	1.92946	1.28326	0.979905	0.94256	1.06449	1.71428	2.01657	2.54031	0.475597	0.322509	0.305792	0.362013	0.756685	1.01039	1.59777
NM_026580	Otub2	H3K4me3-only	1.31104	0.666111	0.690001	0.610697	1.26354	0.832332	5.74144	7.62212	-0.976877	-0.926041	-1.10218	-0.0532404	-0.655481	2.1307	2.53948	-0.644929	-0.621039	-0.700343	-0.0475	-0.478708	4.4304	6.31108
NM_010346	Grb7	H3K4me3-only	3.56192	1.42656	1.89914	3.5207	6.16933	8.98657	14.9894	20.6678	-1.32011	-0.907309	-0.0167928	0.792459	1.33512	2.07322	2.53666	-2.13536	-1.66278	-0.04122	2.60741	5.42465	11.4275	17.1059
NM_175514	Fam171b	H3K4me3-only	0.506422	0.537923	0.314825	0.676137	1.40604	1.10139	1.66241	2.92652	0.0870596	-0.68579	0.416976	1.47323	1.12091	1.71486	2.53077	0.031501	-0.191597	0.169715	0.899618	0.594968	1.15599	2.4201
NM_008869	Pla2g4a	H3K4me3-only	0.460435	0.499868	0.503082	0.277319	0.716554	2.36856	3.63019	2.65919	0.11855	0.127796	-0.731451	0.638078	2.36294	2.97898	2.52992	0.039433	0.042647	-0.183116	0.256119	1.90813	3.16975	2.19876
NM_133182	Prmt2	H3K4me3-only	0.745281	0.547337	0.678488	0.503087	1.27988	1.51204	1.77661	4.29921	-0.445355	-0.135461	-0.566977	0.780152	1.02064	1.25327	2.52822	-0.197944	-0.066793	-0.242194	0.534599	0.766759	1.03133	3.55393
NM_010117	Rhbdf1	H3K4me3-only	1.24451	2.09689	4.57908	1.18143	2.00582	2.08025	3.36031	7.13591	0.752673	1.87948	-0.0750437	0.688614	0.741179	1.43302	2.51952	0.85238	3.33457	-0.06308	0.76131	0.83574	2.1158	5.8914
NR_040660	LOC100504703	H3K4me3-only	1.00296	1.40025	1.77184	1.76571	1.69973	2.50563	3.75622	5.64987	0.48142	0.820984	0.815984	0.761042	1.32091	1.90502	2.49395	0.39729	0.76888	0.76275	0.69677	1.50267	2.75326	4.64691
NM_010329	Pdpn	H3K4me3-only	3.38195	3.0015	3.40824	3.53009	7.28931	18.0849	20.5982	18.9832	-0.172172	0.0111716	0.0618496	1.10793	2.41886	2.60659	2.4888	-0.38045	0.02629	0.14814	3.90736	14.703	17.2162	15.6013
NM_173395	Fam132b	H3K4me3-only	0.249941	0.196372	0.119144	0.127221	0.247518	0.644242	1.17109	1.3989	-0.347998	-1.06888	-0.974251	-0.0140541	1.36602	2.22819	2.48463	-0.053569	-0.130797	-0.12272	-0.002423	0.394301	0.921149	1.14896
NM_026644	Agpat4	H3K4me3-only	2.5994	0.915998	0.97736	2.34719	5.4321	6.1163	9.49843	14.5408	-1.50476	-1.41122	-0.147244	1.06333	1.23448	1.86951	2.48386	-1.6834	-1.62204	-0.25221	2.8327	3.5169	6.89903	11.9414
NM_011896	Spry1	H3K4me3-only	2.80017	2.04002	3.24303	3.72707	5.75813	7.03648	8.99727	15.6335	-0.456931	0.211828	0.412527	1.04009	1.32934	1.68397	2.48105	-0.76015	0.44286	0.9269	2.95796	4.23631	6.1971	12.8333
NM_207206	Lpcat4	H3K4me3-only	1.99708	1.93527	1.93986	1.87261	2.38541	6.21267	10.4367	11.0179	-0.0453573	-0.0419396	-0.0928417	0.256345	1.63732	2.3857	2.46389	-0.06181	-0.05722	-0.12447	0.38833	4.21559	8.43962	9.02082
NM_027127	Gpx8	H3K4me3-only	2.41476	2.81965	5.03493	3.18161	2.56314	2.49362	6.38351	13.2909	0.223636	1.06009	0.397877	0.0860325	0.0463618	1.40247	2.46049	0.40489	2.62017	0.76685	0.14838	0.07886	3.96875	10.8761
NM_080595	Emid1	H3K4me3-only	0.353368	0.356118	0.174149	0.159898	0.1771	0.212368	1.34404	1.94111	0.011184	-1.02085	-1.14402	-0.996607	-0.734605	1.92733	2.45764	0.00275	-0.179219	-0.19347	-0.176268	-0.141	0.990672	1.58774
NM_177293	Mtap7d3	H3K4me3-only	0.499291	0.250671	0.464767	1.26329	4.04694	5.48608	2.75995	2.73939	-0.994086	-0.103373	1.33923	3.01888	3.45782	2.46669	2.4559	-0.24862	-0.034524	0.763999	3.54765	4.98679	2.26066	2.2401
NM_199028	Bend3	H3K4me3-only	4.55985	5.15731	8.10254	9.1846	17.0162	28.6506	24.1684	25.0126	0.177632	0.829388	1.01023	1.89985	2.65151	2.40606	2.4556	0.59746	3.54269	4.62475	12.4564	24.0907	19.6085	20.4527
NM_010496	Id2	H3K4me3-only	0.354673	2.35746	3.66347	1.95473	2.62387	3.73784	2.28967	1.93969	2.73267	3.36865	2.46241	2.88713	3.39764	2.69058	2.45126	2.00279	3.3088	1.60006	2.2692	3.38317	1.935	1.58502
NM_172587	Cdc14b	H3K4me3-only	0.769466	0.529844	1.13134	1.16679	1.55833	2.07983	3.27942	4.18496	-0.53829	0.556103	0.600615	1.01807	1.43454	2.09151	2.44328	-0.239622	0.361874	0.397324	0.788864	1.31036	2.50995	3.41549
NM_178695	Prrg4	H3K4me3-only	4.48151	4.80376	8.91509	11.2931	14.7063	17.0413	17.3286	24.3529	0.100179	0.992264	1.33338	1.71438	1.92698	1.9511	2.44204	0.32225	4.43358	6.81159	10.2248	12.5598	12.8471	19.8714
NM_001039162	Clip2	H3K4me3-only	0.544849	0.336271	0.424655	0.482117	0.875762	1.72596	2.15341	2.94829	-0.696232	-0.359565	-0.176473	0.684682	1.66347	1.98269	2.43595	-0.208578	-0.120194	-0.062732	0.330913	1.18111	1.60856	2.40344
NM_001163457	Mttp	H3K4me3-only	0.433526	0.387803	0.595997	0.416412	0.737542	1.34541	1.31425	2.34586	-0.160795	0.459187	-0.0581069	0.766607	1.63386	1.60005	2.43593	-0.045723	0.162471	-0.017114	0.304016	0.911884	0.880724	1.91233
NM_153068	Ehd2	H3K4me3-only	0.0710478	0.0740003	0.0996263	0.085221	0.173436	0.38244	0.441706	0.384428	0.0587411	0.487737	0.262419	1.28754	2.42837	2.63622	2.43585	0.0029525	0.0285785	0.0141732	0.102388	0.311392	0.370658	0.31338
NM_175259	Shisa4	H3K4me3-only	0.579559	0.415177	1.0185	0.677637	0.856176	0.499839	2.17658	3.13434	-0.481229	0.813419	0.225557	0.562952	-0.213492	1.90904	2.43513	-0.164382	0.438941	0.098078	0.276617	-0.07972	1.59702	2.55478
NM_027644	Prss41	H3K4me3-only	0.43858	0.226559	0.293939	0.251474	0.591988	0.87657	1.94286	2.36931	-0.952953	-0.577323	-0.802431	0.432728	0.999029	2.14727	2.43356	-0.212021	-0.144641	-0.187106	0.153408	0.43799	1.50428	1.93073
NM_023672	Ssbp3	H3K4me3-only	4.11715	2.9315	4.39919	7.09514	10.442	19.9465	24.6086	22.1664	-0.490007	0.0955919	0.785185	1.34268	2.27642	2.57944	2.42866	-1.18565	0.28204	2.97799	6.32485	15.8294	20.4915	18.0493
NM_172632	Mapk4	H3K4me3-only	2.35794	1.903	3.13668	4.72617	3.7881	2.7475	4.60579	12.6765	-0.309251	0.411711	1.00314	0.683947	0.220592	0.965922	2.42656	-0.45494	0.77874	2.36823	1.43016	0.38956	2.24785	10.3186
NM_178411	Zfp334	H3K4me3-only	0.85853	0.568784	1.56759	1.06721	0.756939	1.04186	3.24824	4.6077	-0.593988	0.868608	0.313904	-0.181692	0.279221	1.91972	2.42411	-0.289746	0.70906	0.20868	-0.101591	0.18333	2.38971	3.74917
NR_033185	Rcbtb2	H3K4me3-only	1.05745	1.04122	1.99748	1.4824	2.18585	3.1467	4.14292	5.66876	-0.0223145	0.917592	0.487345	1.0476	1.57325	1.97006	2.42244	-0.01623	0.94003	0.42495	1.1284	2.08925	3.08547	4.61131
NM_028734	Steap2	H3K4me3-only	0.174655	0.245618	0.874107	0.942789	1.56342	1.29587	0.62663	0.919327	0.491908	2.3233	2.43243	3.16213	2.89134	1.84311	2.39607	0.070963	0.699452	0.768134	1.38877	1.12122	0.451975	0.744672
NM_021715	Chst7	H3K4me3-only	0.197614	0.395675	0.292893	0.298619	0.482321	0.493219	0.83847	1.03721	1.00163	0.567689	0.595621	1.28731	1.31954	2.08507	2.39195	0.198061	0.095279	0.101005	0.284707	0.295605	0.640856	0.839596
NM_001162485	Arrdc1	H3K4me3-only	2.75213	1.74871	1.2688	1.4925	4.54912	9.43923	15.9654	14.4444	-0.654258	-1.11708	-0.882818	0.725039	1.77812	2.53633	2.39189	-1.00342	-1.48333	-1.25963	1.79699	6.6871	13.2133	11.6923
NM_153422	Pde5a	H3K4me3-only	1.01515	0.940971	1.22555	0.698789	0.719436	1.22026	2.12769	5.32326	-0.109471	0.271736	-0.538764	-0.496755	0.265496	1.0676	2.39062	-0.074179	0.2104	-0.316361	-0.295714	0.20511	1.11254	4.30811
NM_024223	Crip2	H3K4me3-only	8.18226	7.78837	9.23739	14.8746	24.4764	31.4674	52.325	42.5877	-0.071178	0.174986	0.86228	1.58082	1.94329	2.67693	2.37987	-0.39389	1.05513	6.69234	16.2941	23.2851	44.1427	34.4054
NM_010513	Igf1r	H3K4me3-only	1.23503	0.755115	1.42549	1.21581	1.54297	2.50693	2.16665	6.41934	-0.709778	0.206912	-0.0226283	0.321164	1.02138	0.81092	2.37788	-0.479915	0.19046	-0.01922	0.30794	1.2719	0.93162	5.18431
NM_001081069	Rgs11	H3K4me3-only	0.179444	0.286855	0.0849235	0.176569	0.431892	0.649595	0.872119	0.932492	0.676788	-1.0793	-0.0233016	1.26714	1.85601	2.28099	2.37756	0.107411	-0.0945205	-0.002875	0.252448	0.470151	0.692675	0.753048
NM_024272	Ssbp2	H3K4me3-only	0.352917	0.280517	0.861999	1.31276	1.16407	1.07724	1.23405	1.83293	-0.331241	1.28836	1.8952	1.72178	1.60994	1.806	2.37675	-0.0724	0.509082	0.959843	0.811153	0.724323	0.881133	1.48001
NM_178395	Zdhhc2	H3K4me3-only	1.81415	3.17902	3.15305	1.70672	2.12063	2.01189	5.0598	9.35771	0.809288	0.797454	-0.0880674	0.225199	0.149258	1.47979	2.36686	1.36487	1.3389	-0.10743	0.30648	0.19774	3.24565	7.54356
NM_172913	Tox3	H3K4me3-only	0.218142	0.248908	0.100709	0.0407168	0.114435	0.200335	0.390219	1.12361	0.190345	-1.11507	-2.42157	-0.930739	-0.122853	0.839016	2.3648	0.030766	-0.117433	-0.177425	-0.103707	-0.017807	0.172077	0.905468
NM_020493	Srf	H3K4me3-only	4.67207	9.69011	6.79198	7.54316	10.1436	11.721	16.9623	24.0612	1.05245	0.53977	0.691107	1.11844	1.32696	1.8602	2.36457	5.01804	2.11991	2.87109	5.47153	7.04893	12.2902	19.3891
NM_177230	Ccdc158	H3K4me3-only	0.0829613	0.0884049	0.274746	0.320763	0.713077	0.627889	0.736803	0.425759	0.0916878	1.72759	1.951	3.10355	2.92	3.15077	2.35953	0.0054436	0.191785	0.237802	0.630116	0.544928	0.653842	0.342798
NM_145134	Spsb4	H3K4me3-only	0.173308	0.15239	0.505923	0.647963	0.9211	0.663094	0.871427	0.889187	-0.18557	1.54558	1.90257	2.41002	1.93588	2.33004	2.35915	-0.020918	0.332615	0.474655	0.747792	0.489786	0.698119	0.715879
NM_023047	Dpysl5	H3K4me3-only	0.870388	0.576069	0.167878	0.306908	0.598895	0.893175	2.06501	4.46295	-0.595417	-2.37425	-1.50385	-0.539356	0.0372842	1.24642	2.35827	-0.294319	-0.70251	-0.56348	-0.271493	0.022787	1.19462	3.59256
NM_175260	Myh10	H3K4me3-only	7.63935	9.40354	9.35044	9.5024	11.0315	18.2966	24.4463	39.0198	0.299754	0.291584	0.314842	0.530107	1.26005	1.67809	2.35268	1.76419	1.71109	1.86305	3.39215	10.6573	16.807	31.3804
NM_001045524	AK129341	H3K4me3-only	0.565648	0.415173	0.567603	0.805262	1.12568	1.25048	1.78918	2.87759	-0.446192	0.00497766	0.509554	0.99282	1.14451	1.66132	2.34688	-0.150475	0.001955	0.239614	0.560032	0.684832	1.22353	2.31194
NM_013565	Itga3	H3K4me3-only	2.49047	3.18656	9.26831	12.606	9.70551	17.4457	12.607	12.6624	0.355582	1.89589	2.33962	1.96239	2.80838	2.33974	2.34606	0.69609	6.77784	10.1155	7.21504	14.9552	10.1165	10.1719
NM_001034907	Zc3h12b	H3K4me3-only	0.072412	0.0724918	0.0627934	0.0976121	0.111269	0.181582	0.152041	0.367378	0.00158901	-0.205616	0.430831	0.619751	1.32632	1.07016	2.34296	7.98e-05	-0.0096186	0.0252001	0.038857	0.10917	0.079629	0.294966
NM_198191	Pip5kl1	H3K4me3-only	0.355467	0.348122	0.14732	0.290526	0.236192	0.325606	1.06704	1.80308	-0.0301226	-1.27076	-0.291048	-0.589756	-0.126588	1.58583	2.34268	-0.007345	-0.208147	-0.064941	-0.119275	-0.029861	0.711573	1.44761
NM_172685	Slc25a24	H3K4me3-only	0.654758	0.575162	1.0319	0.36181	0.220772	0.244445	1.14808	3.31732	-0.186993	0.656269	-0.855729	-1.5684	-1.42145	0.810189	2.34098	-0.079596	0.377142	-0.292948	-0.433986	-0.410313	0.493322	2.66256
NM_177235	Bend6	H3K4me3-only	0.317356	0.227489	0.0988069	0.0950348	0.0883871	0.0787734	0.289915	1.60309	-0.480305	-1.68342	-1.73957	-1.84419	-2.01032	-0.130472	2.33668	-0.089867	-0.218549	-0.222321	-0.228969	-0.238583	-0.027441	1.28573
NM_010864	Myo5a	H3K4me3-only	2.1612	2.20084	2.61014	2.84783	3.22323	5.10863	7.16831	10.9056	0.0262217	0.272295	0.39803	0.576675	1.2411	1.7298	2.33516	0.03964	0.44894	0.68663	1.06203	2.94743	5.00711	8.7444
NM_134065	Epdr1	H3K4me3-only	2.09928	0.880469	1.54375	2.07538	4.48505	5.18119	7.80788	10.5648	-1.25355	-0.443455	-0.0165191	1.09523	1.30339	1.89504	2.3313	-1.21881	-0.55553	-0.0239	2.38577	3.08191	5.7086	8.46552
NM_008595	Mfng	H3K4me3-only	0.411366	0.358252	0.289196	0.649798	1.18377	1.56022	4.54551	2.06313	-0.199448	-0.508375	0.659569	1.52489	1.92326	3.46595	2.32634	-0.053114	-0.12217	0.238432	0.772404	1.14885	4.13414	1.65176
NM_027949	Phf7	H3K4me3-only	0.982878	0.993631	1.83452	1.40448	1.68038	1.84956	3.47205	4.91236	0.0156978	0.900318	0.514952	0.773703	0.912098	1.8207	2.32133	0.010753	0.851642	0.421602	0.697502	0.866682	2.48917	3.92948
NM_207625	Acsl4	H3K4me3-only	3.25858	2.90701	2.30488	2.54768	6.90641	11.5428	9.91818	16.2775	-0.164707	-0.499552	-0.355059	1.08369	1.82468	1.60583	2.32056	-0.35157	-0.9537	-0.7109	3.64783	8.28422	6.6596	13.0189
NM_144796	Susd4	H3K4me3-only	0.769047	0.604076	0.969235	1.50353	1.95527	1.6215	2.83473	3.82973	-0.348342	0.333775	0.96721	1.34622	1.07619	1.88207	2.3161	-0.164971	0.200188	0.734483	1.18622	0.852453	2.06568	3.06068
NR_029441	2810454H06Rik	H3K4me3-only	0.289758	0.469278	0.357105	0.395972	0.29408	0.457594	0.795958	1.43969	0.695594	0.3015	0.45055	0.0213602	0.65922	1.45784	2.31284	0.17952	0.067347	0.106214	0.004322	0.167836	0.5062	1.14993
NM_145933	St6gal1	H3K4me3-only	1.17414	0.776366	0.309798	0.836072	1.57731	2.09287	3.80222	5.81725	-0.596796	-1.9222	-0.489905	0.425862	0.833878	1.69524	2.30873	-0.397774	-0.864342	-0.338068	0.40317	0.91873	2.62808	4.64311
NM_177226	Zfp629	H3K4me3-only	0.743684	0.430272	0.301799	0.356643	0.511933	1.07223	1.7342	3.68309	-0.789441	-1.3011	-1.06021	-0.538735	0.527853	1.22151	2.30816	-0.313412	-0.441885	-0.387041	-0.231751	0.328546	0.990516	2.93941
NR_038186	0610007N19Rik	H3K4me3-only	0.229891	0.0698701	0.0857505	0.0781883	0.197787	0.111117	0.454119	1.13784	-1.7182	-1.42273	-1.55593	-0.217002	-1.04887	0.98212	2.30728	-0.160021	-0.144141	-0.151703	-0.032104	-0.118774	0.224228	0.907949
NM_182927	Spred3	H3K4me3-only	0.472971	0.441876	0.69136	0.734928	0.974028	2.91285	2.98149	2.33945	-0.0981102	0.547685	0.635851	1.04221	2.62261	2.65621	2.30635	-0.031095	0.218389	0.261957	0.501057	2.43988	2.50852	1.86648
NM_001113412	Fggy	H3K4me3-only	2.86826	2.18868	1.48048	1.78949	3.87007	4.00606	5.91297	14.1623	-0.390115	-0.954111	-0.680627	0.432184	0.482008	1.04371	2.30381	-0.67958	-1.38778	-1.07877	1.00181	1.1378	3.04471	11.294
NM_178214	Hist2h2be	H3K4me3-only	0.15652	0.173518	0.260203	0.316507	0.44431	0.598638	0.413545	0.770541	0.148738	0.733291	1.01589	1.50522	1.93534	1.4017	2.29952	0.016998	0.103683	0.159987	0.28779	0.442118	0.257025	0.614021
NM_009549	Zfp185	H3K4me3-only	1.68578	2.58137	2.75787	4.35265	4.82908	3.83914	4.71423	8.27117	0.614721	0.710138	1.36848	1.51833	1.18737	1.48361	2.29468	0.89559	1.07209	2.66687	3.1433	2.15336	3.02845	6.58539
NM_017405	Lsr	H3K4me3-only	1.55295	1.14968	0.998801	1.81335	3.23049	5.41678	8.09511	7.61565	-0.433779	-0.636742	0.223646	1.05674	1.80242	2.38204	2.29396	-0.40327	-0.554149	0.2604	1.67754	3.86383	6.54216	6.0627
NM_133351	Prss8	H3K4me3-only	2.51421	0.493008	0.164284	0.37576	2.60562	6.88396	8.9514	12.2666	-2.35042	-3.93584	-2.74222	0.0515215	1.45313	1.83201	2.28656	-2.0212	-2.34993	-2.13845	0.09141	4.36975	6.43719	9.75239
NM_177735	Tmem130	H3K4me3-only	0.139546	0.0993351	0.520295	0.558591	0.436849	0.611621	0.730844	0.677397	-0.490365	1.89859	2.00105	1.64639	2.1319	2.38882	2.27926	-0.0402109	0.380749	0.419045	0.297303	0.472075	0.591298	0.537851
NM_001003953	Kdm2b	H3K4me3-only	3.94918	2.53256	6.63968	16.5121	21.277	23.2747	19.1112	19.1272	-0.640957	0.749561	2.0639	2.42967	2.55914	2.27479	2.276	-1.41662	2.6905	12.5629	17.3278	19.3255	15.162	15.178
NM_001177789	Phactr3	H3K4me3-only	0.0621455	0.164164	0.0314681	0.0919653	0.133894	0.397282	0.436927	0.30048	1.40142	-0.98176	0.56544	1.10737	2.67644	2.81367	2.27355	0.102019	-0.0306774	0.0298198	0.0717485	0.335137	0.374781	0.238335
NM_026280	Mxra7	H3K4me3-only	1.07161	0.900351	0.369019	0.864451	1.95283	1.70624	4.61241	5.17914	-0.251221	-1.53801	-0.309924	0.865786	0.671041	2.10574	2.27293	-0.171259	-0.702591	-0.207159	0.88122	0.63463	3.5408	4.10753
NM_011987	Pla2g10	H3K4me3-only	1.24874	1.37932	2.16652	5.95475	11.7356	13.1378	11.3778	6.00271	0.143484	0.794906	2.25357	3.23235	3.39518	3.18768	2.26514	0.13058	0.91778	4.70601	10.4869	11.8891	10.1291	4.75397
NM_015771	Lats2	H3K4me3-only	0.390844	1.98561	2.71574	2.37497	2.19816	1.0542	0.941544	1.87475	2.34492	2.79668	2.60324	2.49163	1.43148	1.26844	2.26203	1.59477	2.3249	1.98413	1.80732	0.663356	0.5507	1.48391
NM_026524	Mid1ip1	H3K4me3-only	5.48313	2.82698	3.41194	6.52256	12.9896	17.5596	23.7823	26.2573	-0.955738	-0.684407	0.250439	1.24429	1.67919	2.11682	2.25965	-2.65615	-2.07119	1.03943	7.50647	12.0765	18.2992	20.7742
NM_026515	2810417H13Rik	H3K4me3-only	7.48449	7.46893	5.46516	5.5722	15.0045	20.1892	38.3405	35.8111	-0.00300244	-0.45364	-0.425657	1.00342	1.43161	2.35689	2.25843	-0.01556	-2.01933	-1.91229	7.52001	12.7047	30.856	28.3266
NM_001199283	Slc43a2	H3K4me3-only	0.502736	0.137572	0.193847	0.257634	0.697844	0.783935	1.30795	2.40306	-1.86961	-1.37488	-0.964478	0.473104	0.640933	1.37943	2.257	-0.365164	-0.308889	-0.245102	0.195108	0.281199	0.805214	1.90032
NM_008439	Khk	H3K4me3-only	1.31854	0.706245	0.495808	0.261172	0.698938	1.02873	3.67157	6.30177	-0.900701	-1.41109	-2.33587	-0.915705	-0.358077	1.47746	2.25682	-0.612295	-0.822732	-1.05737	-0.619602	-0.28981	2.35303	4.98323
NM_027450	Glipr2	H3K4me3-only	9.33188	6.9368	4.80162	4.49169	9.46628	10.6042	37.0192	44.4342	-0.427897	-0.958647	-1.05491	0.0206298	0.184396	1.98803	2.25143	-2.39508	-4.53026	-4.84019	0.1344	1.27232	27.6873	35.1023
NM_008855	Prkcb	H3K4me3-only	0.453104	0.52222	0.332554	0.314152	0.618524	1.43399	3.38806	2.14687	0.204815	-0.446254	-0.528379	0.448987	1.66212	2.90255	2.24432	0.069116	-0.12055	-0.138952	0.16542	0.980886	2.93496	1.69377
NM_001252153	Tmem106c	H3K4me3-only	2.36836	1.75935	1.90114	2.49098	2.84778	2.49533	4.32558	11.1757	-0.428846	-0.317024	0.072825	0.265949	0.0753422	0.869005	2.2384	-0.60901	-0.46722	0.12262	0.47942	0.12697	1.95722	8.80734
NM_175178	Aifm3	H3K4me3-only	0.738713	0.507227	0.168525	0.301101	0.264192	0.583459	2.81903	3.46917	-0.542382	-2.13205	-1.29477	-1.48343	-0.340383	1.93211	2.2315	-0.231486	-0.570188	-0.437612	-0.474521	-0.155254	2.08032	2.73046
NM_177225	Samd12	H3K4me3-only	0.574961	0.333037	0.125108	0.575536	1.05205	0.882963	1.33338	2.68763	-0.787782	-2.20029	0.00144207	0.871667	0.618889	1.21355	2.2248	-0.241924	-0.449853	0.000575	0.477089	0.308002	0.758419	2.11267
NM_183178	Fsd1	H3K4me3-only	2.10211	2.01893	1.63547	3.04203	2.95536	3.07633	8.42045	9.77525	-0.0582473	-0.362133	0.533196	0.491496	0.549372	2.00206	2.2173	-0.08318	-0.46664	0.93992	0.85325	0.97422	6.31834	7.67314
NM_007488	Arnt2	H3K4me3-only	0.614502	0.702543	0.475057	0.482154	1.00199	0.954704	1.77896	2.85617	0.193169	-0.371317	-0.349924	0.705378	0.635636	1.53354	2.21659	0.088041	-0.139445	-0.132348	0.387488	0.340202	1.16446	2.24167
NM_001162926	Fam84b	H3K4me3-only	1.50643	0.626466	0.228174	0.240971	0.798701	2.7537	6.77788	6.97652	-1.26583	-2.72293	-2.6442	-0.915406	0.870238	2.1697	2.21137	-0.879964	-1.27826	-1.26546	-0.707729	1.24727	5.27145	5.47009
NM_177630	Ldoc1l	H3K4me3-only	0.662104	0.394868	0.853752	0.588814	0.480326	1.35346	2.47757	3.06128	-0.745687	0.366759	-0.169246	-0.463044	1.03152	1.9038	2.20901	-0.267236	0.191648	-0.07329	-0.181778	0.691356	1.81547	2.39918
NM_181595	Ppp1r9a	H3K4me3-only	1.14412	0.965582	1.6862	2.54853	3.03648	2.09773	3.01941	5.28515	-0.244768	0.559537	1.15543	1.40816	0.874591	1.40003	2.20771	-0.178538	0.54208	1.40441	1.89236	0.95361	1.87529	4.14103
NM_026864	Rasl11a	H3K4me3-only	0.359099	0.789505	3.22949	1.92513	1.43086	2.32653	3.06666	1.65755	1.13657	3.16885	2.4225	1.99443	2.69573	3.09421	2.2066	0.430406	2.87039	1.56603	1.07176	1.96743	2.70756	1.29845
NM_028979	Cyp2j9	H3K4me3-only	0.474436	0.382109	0.221274	0.29624	0.534767	0.484076	1.1969	2.18572	-0.312229	-1.10038	-0.679447	0.172697	0.0290201	1.33502	2.20382	-0.092327	-0.253162	-0.178196	0.060331	0.00964	0.722464	1.71128
NR_027924	2010204K13Rik	H3K4me3-only	2.96293	2.38631	4.69217	5.3168	9.18972	12.0977	15.3861	13.6286	-0.312243	0.663231	0.843534	1.633	2.02964	2.37653	2.20154	-0.57662	1.72924	2.35387	6.22679	9.13477	12.4232	10.6657
NM_001039472	Kif21b	H3K4me3-only	0.805408	0.455398	0.221453	0.277683	0.397361	0.563544	2.40872	3.66463	-0.822592	-1.86272	-1.53628	-1.01927	-0.515192	1.58047	2.18588	-0.35001	-0.583955	-0.527725	-0.408047	-0.241864	1.60331	2.85922
NM_027309	Lysmd2	H3K4me3-only	1.38136	1.64797	3.21266	2.02235	2.9038	3.77465	6.08146	6.26927	0.254601	1.21768	0.549943	1.07185	1.45025	2.13833	2.18221	0.26661	1.8313	0.64099	1.52244	2.39329	4.7001	4.88791
NM_023597	Wdr31	H3K4me3-only	2.103	1.10852	1.12418	2.31829	4.08548	5.17427	8.10926	9.53111	-0.923814	-0.903576	0.140612	0.958057	1.29891	1.94712	2.1802	-0.99448	-0.97882	0.21529	1.98248	3.07127	6.00626	7.42811
NM_026832	Cgrrf1	H3K4me3-only	1.39687	1.07988	0.830583	0.649732	1.1426	1.5972	3.8508	6.32497	-0.371327	-0.750002	-1.10428	-0.289877	0.193347	1.46296	2.17886	-0.31699	-0.566287	-0.747138	-0.25427	0.20033	2.45393	4.9281
NR_033305	AA388235	H3K4me3-only	0.189131	0.107033	0.177626	0.277377	0.408093	0.681529	0.734804	0.854172	-0.82133	-0.0905431	0.552462	1.10951	1.84939	1.95797	2.17514	-0.082098	-0.011505	0.088246	0.218962	0.492398	0.545673	0.665041
NM_177261	Kndc1	H3K4me3-only	0.233741	0.091252	0.313666	1.30491	2.59025	1.86958	1.70688	1.05555	-1.35698	0.424318	2.48097	3.47011	2.99973	2.86838	2.17501	-0.142489	0.079925	1.07117	2.35651	1.63584	1.47314	0.821809
NM_177391	Fam109b	H3K4me3-only	0.237249	0.0987539	0.0783398	0.182702	0.327558	0.152699	0.542124	1.06366	-1.26449	-1.59858	-0.37691	0.465348	-0.635711	1.19222	2.16456	-0.138495	-0.158909	-0.054547	0.090309	-0.08455	0.304875	0.826411
NM_001024720	Hmcn1	H3K4me3-only	0.122136	0.196543	0.100912	0.0790548	0.0530332	0.037141	0.0973157	0.547202	0.686356	-0.275391	-0.627564	-1.20352	-1.7174	-0.327744	2.16359	0.074407	-0.021224	-0.0430812	-0.0691028	-0.084995	-0.0248203	0.425066
NM_029485	Spata24	H3K4me3-only	2.31601	1.62851	2.25427	3.50015	4.92438	5.04131	7.84478	10.3619	-0.508089	-0.0389812	0.595775	1.0883	1.12216	1.76009	2.16158	-0.6875	-0.06174	1.18414	2.60837	2.7253	5.52877	8.04589
NM_175274	Ttyh3	H3K4me3-only	0.831188	0.889118	0.742212	0.813909	1.31094	2.04056	2.6757	3.71715	0.0972001	-0.163343	-0.0303073	0.657355	1.29572	1.68667	2.16095	0.05793	-0.088976	-0.017279	0.479752	1.20937	1.84451	2.88596
NM_010723	Lmo4	H3K4me3-only	1.35272	1.07314	3.45573	3.0356	4.2006	4.24856	4.41726	6.02412	-0.334025	1.35313	1.16612	1.63473	1.65111	1.70729	2.15489	-0.27958	2.10301	1.68288	2.84788	2.89584	3.06454	4.6714
NM_017377	B4galt2	H3K4me3-only	1.86214	0.958986	1.01604	1.22372	2.70005	2.59121	4.70949	8.27424	-0.95738	-0.874004	-0.605688	0.536025	0.476664	1.33861	2.15167	-0.903154	-0.8461	-0.63842	0.83791	0.72907	2.84735	6.4121
NM_001253706	44080	H3K4me3-only	1.05923	1.25093	0.973136	0.94787	1.69498	2.37651	4.66468	4.7038	0.239985	-0.122303	-0.160255	0.678252	1.16583	2.13876	2.15081	0.1917	-0.086094	-0.11136	0.63575	1.31728	3.60545	3.64457
NR_027923	C630043F03Rik	H3K4me3-only	0.151108	0.157387	0.235449	0.214084	0.223118	0.248594	0.556961	0.66551	0.0587363	0.639835	0.502597	0.562227	0.718211	1.882	2.13888	0.006279	0.084341	0.062976	0.07201	0.097486	0.405853	0.514402
NM_026125	Fam132a	H3K4me3-only	0.592804	1.01228	0.722925	0.646713	1.07349	1.0681	2.29559	2.60363	0.771981	0.286291	0.12557	0.856682	0.84942	1.95324	2.1349	0.419476	0.130121	0.053909	0.480686	0.475296	1.70279	2.01083
NM_021567	Pcbp4	H3K4me3-only	15.5689	8.6376	16.4886	28.3043	39.4619	46.756	72.35	68.3708	-0.849965	0.0828019	0.862354	1.34179	1.58648	2.21633	2.13471	-6.9313	0.9197	12.7354	23.893	31.1871	56.7811	52.8019
NM_008591	Met	H3K4me3-only	0.905015	0.511801	0.352804	0.330001	0.587638	0.643509	1.70168	3.97155	-0.822359	-1.35907	-1.45547	-0.623014	-0.491981	0.910946	2.13369	-0.393214	-0.552211	-0.575014	-0.317377	-0.261506	0.796665	3.06654
NM_177708	Rtn4rl1	H3K4me3-only	0.45373	0.484776	0.915348	0.89719	1.02756	1.84765	2.39926	1.98358	0.0954842	1.01249	0.983579	1.17932	2.02579	2.40268	2.1282	0.031046	0.461618	0.44346	0.57383	1.39392	1.94553	1.52985
NM_010059	Dmc1	H3K4me3-only	1.1651	1.08263	1.0618	0.863716	1.55815	1.91372	3.78506	5.07782	-0.105914	-0.133942	-0.431825	0.41938	0.715926	1.69986	2.12376	-0.08247	-0.1033	-0.301384	0.39305	0.74862	2.61996	3.91272
NM_054053	Gpr98	H3K4me3-only	0.369806	0.419494	0.632864	0.544013	0.676985	0.955744	1.03048	1.61156	0.181882	0.775127	0.556872	0.872355	1.36986	1.47848	2.12362	0.049688	0.263058	0.174207	0.307179	0.585938	0.660674	1.24175
NM_011611	Cd40	H3K4me3-only	0.351164	0.161106	0.285901	0.324752	0.416232	0.259412	0.619577	1.5294	-1.12413	-0.296629	-0.112807	0.245243	-0.4369	0.819139	2.12275	-0.190058	-0.065263	-0.026412	0.065068	-0.091752	0.268413	1.17824
NM_025549	Arrdc4	H3K4me3-only	7.91281	6.13625	9.27377	12.1792	19.3736	15.4948	49.5336	34.0469	-0.366833	0.228966	0.622157	1.29183	0.969522	2.64615	2.10526	-1.77656	1.36096	4.26639	11.4608	7.58199	41.6208	26.1341
NM_001039934	Map2	H3K4me3-only	0.485472	0.288192	0.118463	0.113486	0.325532	0.343953	0.80759	2.08496	-0.752358	-2.03495	-2.09687	-0.576589	-0.497177	0.734235	2.10256	-0.19728	-0.367009	-0.371986	-0.15994	-0.141519	0.322118	1.59949
NM_001252330	Slc6a15	H3K4me3-only	2.19677	2.13365	6.07408	5.90625	5.96853	2.45878	6.06726	9.42424	-0.0420603	1.46728	1.42686	1.44199	0.162559	1.46566	2.10099	-0.06312	3.87731	3.70948	3.77176	0.26201	3.87049	7.22747
NM_008608	Mmp14	H3K4me3-only	1.16375	0.891155	1.99157	3.15812	2.79516	2.22719	2.85978	4.98386	-0.385033	0.775125	1.44028	1.26415	0.936443	1.29712	2.09848	-0.272595	0.82782	1.99437	1.63141	1.06344	1.69603	3.82011
NM_011161	Mapk11	H3K4me3-only	0.853212	0.777863	2.55366	1.15431	1.46224	1.71375	2.2195	3.65352	-0.133388	1.58159	0.436055	0.777204	1.00618	1.37926	2.09831	-0.075349	1.70045	0.301098	0.609028	0.860538	1.36629	2.80031
NM_001037927	Wdr93	H3K4me3-only	0.283014	0.292649	0.119545	0.125194	0.212716	0.172525	0.46988	1.21182	0.0482979	-1.24332	-1.17671	-0.411945	-0.714068	0.731419	2.09823	0.009635	-0.163469	-0.15782	-0.070298	-0.110489	0.186866	0.928806
NM_011386	Skil	H3K4me3-only	3.47236	4.17892	4.01853	4.29862	15.5564	28.5012	17.3834	14.7362	0.267214	0.210751	0.307957	2.16352	3.03703	2.32372	2.08538	0.70656	0.54617	0.82626	12.084	25.0288	13.911	11.2638
NM_001146349	Rnf217	H3K4me3-only	0.71963	0.832393	0.84418	0.652695	1.70503	2.46841	3.14064	3.05381	0.21001	0.230295	-0.140846	1.24447	1.77825	2.12573	2.08528	0.112763	0.12455	-0.066935	0.9854	1.74878	2.42101	2.33418
NM_025980	Nrarp	H3K4me3-only	0.781673	0.637561	0.42837	0.485131	0.494581	0.509226	2.17655	3.29749	-0.294002	-0.867708	-0.688191	-0.660358	-0.618259	1.47741	2.07673	-0.144112	-0.353303	-0.296542	-0.287092	-0.272447	1.39488	2.51582
NM_011639	Trip6	H3K4me3-only	6.17362	5.61157	6.32396	6.77963	9.00306	8.5238	19.0519	25.9091	-0.137712	0.0347116	0.13509	0.544299	0.46538	1.62575	2.06927	-0.56205	0.15034	0.60601	2.82944	2.35018	12.8783	19.7355
NM_019479	Hes6	H3K4me3-only	5.41516	3.38161	4.94982	5.11757	16.0503	28.6081	34.6836	22.7259	-0.679294	-0.129628	-0.081545	1.56752	2.40135	2.67918	2.06926	-2.03355	-0.46534	-0.29759	10.6351	23.1929	29.2684	17.3107
NM_001164184	Lsr	H3K4me3-only	3.62601	3.65152	2.61772	2.04117	5.60711	16.7094	24.4199	15.202	0.0101142	-0.470072	-0.828987	0.628874	2.20421	2.7516	2.06781	0.02551	-1.00829	-1.58484	1.9811	13.0834	20.7939	11.576
NM_009223	Snn	H3K4me3-only	2.94852	2.07795	3.40209	2.9506	6.22514	7.10125	7.75433	12.3476	-0.50483	0.20643	0.00101737	1.07812	1.26808	1.39501	2.06617	-0.87057	0.45357	0.00208	3.27662	4.15273	4.80581	9.39908
NM_207680	Bcl2l11	H3K4me3-only	0.841801	0.680423	1.62107	1.28204	2.28461	3.69546	2.53541	3.51997	-0.307047	0.945395	0.60689	1.4404	2.1342	1.59067	2.06401	-0.161378	0.779269	0.440239	1.44281	2.85366	1.69361	2.67817
NM_001033272	Spata13	H3K4me3-only	1.61784	1.09829	4.05422	5.70989	6.97072	10.4603	7.58935	6.72612	-0.55881	1.32536	1.81939	2.10724	2.69278	2.22991	2.05571	-0.51955	2.43638	4.09205	5.35288	8.84246	5.97151	5.10828
NM_001252588	Tspan4	H3K4me3-only	5.81605	5.96927	4.43124	6.4113	12.4809	16.4767	31.6254	24.1324	0.0375148	-0.392329	0.140577	1.10161	1.50232	2.44297	2.05286	0.15322	-1.38481	0.59525	6.66485	10.6607	25.8093	18.3163
NM_010244	Fv1	H3K4me3-only	0.466761	0.476054	1.04859	0.810381	0.471703	0.423615	0.459875	1.9265	0.0284412	1.16769	0.795916	0.0151948	-0.13993	-0.0214423	2.04523	0.009293	0.581829	0.34362	0.004942	-0.043146	-0.006886	1.45974
NM_009929	Col18a1	H3K4me3-only	17.706	12.5959	27.1652	52.2414	75.0139	85.8955	82.4543	72.8655	-0.491284	0.617521	1.56096	2.08292	2.27834	2.21936	2.041	-5.1101	9.4592	34.5354	57.3079	68.1895	64.7483	55.1595
NM_001271533	Spag16	H3K4me3-only	0.325262	0.281835	0.194838	0.326869	0.30129	0.229304	0.299259	1.3384	-0.206751	-0.739327	0.00711028	-0.110449	-0.504341	-0.120208	2.04084	-0.043427	-0.130424	0.001607	-0.023972	-0.095958	-0.026003	1.01314
NM_019765	Clip1	H3K4me3-only	1.38663	1.40436	1.45938	0.811359	0.97392	1.76332	2.56644	5.68954	0.0183299	0.0737727	-0.773171	-0.509708	0.346711	0.888186	2.03673	0.01773	0.07275	-0.575271	-0.41271	0.37669	1.17981	4.30291
NM_001033874	Ak8	H3K4me3-only	0.307798	0.354389	0.149436	0.222297	0.226025	0.118081	0.397945	1.2614	0.20335	-1.04246	-0.469495	-0.445502	-1.38221	0.370585	2.03497	0.046591	-0.158362	-0.085501	-0.081773	-0.189717	0.090147	0.953602
NM_133703	Fam220a	H3K4me3-only	1.80278	2.3151	1.8971	2.49537	3.49038	5.23614	8.63311	7.37196	0.360851	0.0735724	0.46903	0.953161	1.53828	2.25966	2.03182	0.51232	0.09432	0.69259	1.6876	3.43336	6.83033	5.56918
NM_027875	Syde1	H3K4me3-only	0.817774	0.454203	1.70163	0.946769	0.244408	0.192422	1.15624	3.33115	-0.848365	1.05714	0.21131	-1.74241	-2.08743	0.499667	2.02625	-0.363571	0.883856	0.128995	-0.573366	-0.625352	0.338466	2.51338
NM_025290	Rsph1	H3K4me3-only	1.27674	0.699845	1.49051	1.86059	2.50832	2.72503	5.80423	5.19797	-0.867357	0.223341	0.543295	0.974257	1.09381	2.18464	2.02548	-0.576895	0.21377	0.58385	1.23158	1.44829	4.52749	3.92123
NM_145512	Sft2d2	H3K4me3-only	2.8772	1.7387	1.26501	2.22459	3.36608	2.49989	3.18985	11.686	-0.726656	-1.18552	-0.371126	0.226404	-0.202801	0.148823	2.02204	-1.1385	-1.61219	-0.65261	0.48888	-0.37731	0.31265	8.8088
NM_029801	Tsacc	H3K4me3-only	3.11704	2.96972	4.21765	8.32964	13.3481	15.0516	11.4329	12.6265	-0.0698498	0.436263	1.41808	2.09839	2.27167	1.87494	2.01821	-0.14732	1.10061	5.2126	10.2311	11.9346	8.31586	9.50946
NM_133829	Mfsd6	H3K4me3-only	0.462805	0.454546	0.913728	0.328709	0.295966	0.207936	0.558679	1.87451	-0.0259781	0.98136	-0.493593	-0.644973	-1.15426	0.271615	2.01804	-0.008259	0.450923	-0.134096	-0.166839	-0.254869	0.095874	1.4117
NM_025992	Herc6	H3K4me3-only	0.149621	0.230533	0.237321	0.193069	0.341886	0.48215	0.77087	0.604555	0.623661	0.665527	0.367804	1.1922	1.68817	2.36517	2.01456	0.080912	0.0877	0.043448	0.192265	0.332529	0.621249	0.454934
NM_009502	Vcl	H3K4me3-only	16.9525	27.0022	33.011	22.7018	25.2572	25.2337	29.0112	68.491	0.671579	0.961449	0.421309	0.575197	0.573854	0.775112	2.01442	10.0497	16.0585	5.7493	8.3047	8.2812	12.0587	51.5385
NM_028258	Dzip1l	H3K4me3-only	1.07734	1.23986	1.60254	1.66689	1.45419	2.10342	4.4447	4.35161	0.202704	0.572887	0.629685	0.432742	0.965263	2.04461	2.01408	0.16252	0.5252	0.58955	0.37685	1.02608	3.36736	3.27427
NM_026448	Klhl7	H3K4me3-only	3.86668	3.65868	7.63062	12.5502	16.1416	18.82	18.4914	15.6063	-0.0797721	0.980705	1.69854	2.06162	2.2831	2.25769	2.01296	-0.208	3.76394	8.68352	12.2749	14.9533	14.6247	11.7396
NM_023500	Xk	H3K4me3-only	0.414836	0.527711	0.729541	0.970048	2.46671	1.61109	1.37963	1.67301	0.347207	0.814448	1.22552	2.57198	1.95742	1.73367	2.01183	0.112875	0.314705	0.555212	2.05187	1.19625	0.964794	1.25817
NM_199470	Cdh24	H3K4me3-only	0.486308	0.626322	0.58205	0.869447	1.32204	1.83616	2.49563	1.95811	0.365034	0.259273	0.838228	1.44282	1.91675	2.35946	2.00952	0.140014	0.095742	0.383139	0.835732	1.34985	2.00932	1.4718
NM_027419	2810408A11Rik	H3K4me3-only	1.7988	1.17917	0.668955	0.850511	1.15915	3.46348	4.38838	7.2359	-0.609263	-1.42705	-1.08063	-0.633968	0.945188	1.28665	2.00814	-0.61963	-1.12984	-0.948289	-0.63965	1.66468	2.58958	5.4371
NM_001276402	Lef1	H3K4me3-only	1.7325	0.564323	0.222779	1.31432	10.3829	20.7698	11.0331	6.96644	-1.61826	-2.95917	-0.398539	2.58328	3.58356	2.67091	2.00757	-1.16818	-1.50972	-0.41818	8.6504	19.0373	9.3006	5.23394
NM_019395	Fbp1	H3K4me3-only	0.515825	0.59396	0.519407	0.881718	1.00342	0.747211	2.28076	2.07128	0.203484	0.00998376	0.773436	0.959972	0.534634	2.14456	2.00557	0.078135	0.003582	0.365893	0.487595	0.231386	1.76493	1.55545
NM_177390	Myo1d	H3K4me3-only	0.339346	0.383197	0.291777	0.311048	0.469661	0.749846	1.09476	1.3625	0.175329	-0.217891	-0.12562	0.468863	1.14384	1.68979	2.00543	0.043851	-0.047569	-0.028298	0.130315	0.4105	0.755414	1.02315
NM_011670	Uchl1	H3K4me3-only	17.666	22.444	23.7717	38.3524	67.9957	59.96	62.8231	70.7346	0.345354	0.42827	1.11834	1.94447	1.76302	1.83032	2.00144	4.778	6.1057	20.6864	50.3297	42.294	45.1571	53.0686
NM_201374	Ccdc155	H3K4me3-only	0.341322	0.229763	0.277889	0.49692	0.46296	0.483832	0.963832	1.34899	-0.570987	-0.296625	0.54188	0.439754	0.503373	1.49765	1.98267	-0.111559	-0.063433	0.155598	0.121638	0.14251	0.62251	1.00767
NM_172441	Shroom2	H3K4me3-only	3.92449	4.19261	8.09948	4.74942	5.10764	8.67617	9.42035	15.4825	0.0953435	1.04532	0.275246	0.380152	1.14455	1.26328	1.98006	0.26812	4.17499	0.82493	1.18315	4.75168	5.49586	11.558
NM_023663	Ripk4	H3K4me3-only	2.48138	2.8035	3.1918	3.2807	3.85293	3.20475	6.93555	9.78492	0.176086	0.363228	0.402861	0.634813	0.369069	1.48287	1.97942	0.32212	0.71042	0.79932	1.37155	0.72337	4.45417	7.30354
NM_028207	Dusp3	H3K4me3-only	1.87573	1.12219	0.911485	1.22694	2.66946	3.60149	5.11161	7.38235	-0.741135	-1.04116	-0.612387	0.509096	0.941142	1.44633	1.97663	-0.75354	-0.964245	-0.64879	0.79373	1.72576	3.23588	5.50662
NM_026738	1110007C09Rik	H3K4me3-only	5.60624	4.96695	4.82189	3.28397	9.54514	20.7006	26.3346	22.001	-0.174673	-0.217435	-0.771593	0.767733	1.88457	2.23185	1.97246	-0.63929	-0.78435	-2.32227	3.9389	15.0944	20.7284	16.3948
NM_173402	Rgs12	H3K4me3-only	1.40746	1.05021	0.922406	1.78423	3.44722	3.25796	4.13061	5.52313	-0.422416	-0.60962	0.342208	1.29234	1.21087	1.55326	1.97239	-0.35725	-0.485054	0.37677	2.03976	1.8505	2.72315	4.11567
NM_019993	Aldh9a1	H3K4me3-only	10.9056	8.47954	8.075	9.7054	12.7802	18.3434	33.2007	42.6538	-0.363011	-0.433535	-0.16821	0.228841	0.750192	1.60614	1.96761	-2.42606	-2.8306	-1.2002	1.8746	7.4378	22.2951	31.7482
NM_001166064	Syde2	H3K4me3-only	1.99452	2.67409	2.58004	2.01234	2.59294	3.22663	5.87866	7.75273	0.423006	0.371352	0.0128325	0.378547	0.693987	1.55945	1.95866	0.67957	0.58552	0.01782	0.59842	1.23211	3.88414	5.75821
NM_011795	C1ql1	H3K4me3-only	0.457777	0.449817	0.39666	0.409751	0.706648	0.970642	2.59568	1.77866	-0.0253068	-0.206742	-0.159898	0.626347	1.08429	2.5034	1.95807	-0.00796	-0.061117	-0.048026	0.248871	0.512865	2.1379	1.32088
NM_019487	Hebp2	H3K4me3-only	0.700135	0.498289	0.47915	0.519447	0.515414	0.259251	1.0687	2.71806	-0.49065	-0.547156	-0.430657	-0.441901	-1.43328	0.610152	1.95687	-0.201846	-0.220985	-0.180688	-0.184721	-0.440884	0.368565	2.01792
NM_011756	Zfp36	H3K4me3-only	2.43315	6.76256	0.763235	0.599727	1.5578	2.88599	2.54909	9.44149	1.47474	-1.67263	-2.02045	-0.643315	0.246241	0.067157	1.95619	4.32941	-1.66992	-1.83342	-0.87535	0.45284	0.11594	7.00834
NM_153528	Gramd1c	H3K4me3-only	0.159489	0.311207	0.228972	0	0.0821855	0.0985127	0.287574	0.618475	0.964418	0.521714	-10	-0.956501	-0.695075	0.850476	1.95526	0.151718	0.069483	-0.159489	-0.0773035	-0.0609763	0.128085	0.458986
NM_177736	Lrrc61	H3K4me3-only	0.598077	0.37842	0.455617	0.262823	0.666766	0.505833	1.09403	2.30971	-0.660343	-0.39251	-1.18624	0.156849	-0.24167	0.871249	1.94931	-0.219657	-0.14246	-0.335254	0.068689	-0.092244	0.495953	1.71163
NM_008858	Prkd1	H3K4me3-only	0.324392	0.37169	0.162567	0.27285	0.307428	0.317549	0.711374	1.24696	0.196362	-0.996704	-0.24963	-0.0774897	-0.030759	1.13287	1.94261	0.047298	-0.161825	-0.051542	-0.016964	-0.006843	0.386982	0.922568
NM_010254	Galr2	H3K4me3-only	0.415362	0.143456	0.127399	0.257969	0.341851	0.74125	1.56254	1.59142	-1.53376	-1.70502	-0.687172	-0.281002	0.835591	1.91145	1.93787	-0.271906	-0.287963	-0.157393	-0.073511	0.325888	1.14718	1.17606
NM_008057	Fzd7	H3K4me3-only	8.20483	2.99015	12.4989	13.3477	24.6729	27.4146	25.044	31.3083	-1.45626	0.607256	0.702046	1.58838	1.7404	1.60992	1.932	-5.21468	4.29407	5.14287	16.4681	19.2098	16.8392	23.1035
NM_130877	Peg10	H3K4me3-only	1.24458	3.97104	16.2629	9.255	13.4989	7.32636	5.4142	4.73829	1.67386	3.70785	2.89457	3.43911	2.55744	2.12109	1.92871	2.72646	15.0183	8.01042	12.2543	6.08178	4.16962	3.49371
NM_172747	Kctd13	H3K4me3-only	2.11366	1.26027	1.57141	1.71891	3.45486	5.42118	8.17878	8.01134	-0.74601	-0.427684	-0.298249	0.708884	1.35886	1.95214	1.9223	-0.85339	-0.54225	-0.39475	1.3412	3.30752	6.06512	5.89768
NM_019440	Irgm2	H3K4me3-only	0.491312	0.210178	0.122875	0.0944818	0.618646	2.0542	1.62365	1.86011	-1.22503	-1.99945	-2.37853	0.332475	2.06387	1.72453	1.92068	-0.281134	-0.368437	-0.39683	0.127334	1.56289	1.13234	1.3688
NM_181548	Eras	H3K4me3-only	2.16906	4.69508	14.4198	25.6504	20.4267	10.7043	11.4278	8.21025	1.11408	2.73291	3.56384	3.23531	2.30305	2.39741	1.92036	2.52602	12.2507	23.4813	18.2576	8.53524	9.25874	6.04119
NM_145621	Camkv	H3K4me3-only	1.41097	0.906681	1.1008	3.60629	3.51677	3.50728	6.4507	5.34058	-0.63802	-0.358135	1.35383	1.31756	1.31367	2.19277	1.92031	-0.504289	-0.31017	2.19532	2.1058	2.09631	5.03973	3.92961
NM_178283	Asb13	H3K4me3-only	0.607054	0.756156	1.07829	0.551616	0.244379	0.288423	1.07222	2.2881	0.316859	0.828848	-0.138161	-1.3127	-1.07364	0.820704	1.91425	0.149102	0.471236	-0.055438	-0.362675	-0.318631	0.465166	1.68105
NM_172588	Serinc5	H3K4me3-only	3.90861	3.429	2.93527	2.24717	4.01836	3.75777	3.72586	14.7293	-0.188868	-0.413162	-0.798546	0.0399512	-0.0567789	-0.0690822	1.91396	-0.47961	-0.97334	-1.66144	0.10975	-0.15084	-0.18275	10.8207
NM_001126047	Sema4c	H3K4me3-only	0.811304	0.627581	0.62553	0.785853	2.74312	7.76354	4.0931	3.05683	-0.370441	-0.375164	-0.0459831	1.7575	3.2584	2.33488	1.91372	-0.183723	-0.185774	-0.025451	1.93182	6.95224	3.2818	2.24553
NM_009455	Ube2e1	H3K4me3-only	7.28992	9.3797	11.1521	9.9663	13.4747	16.8224	26.1708	27.464	0.363639	0.613341	0.451155	0.886278	1.20641	1.84398	1.91357	2.08978	3.86218	2.67638	6.18478	9.53248	18.8809	20.1741
NM_178877	Slc9b2	H3K4me3-only	0.27915	0.3464	0.675025	1.15013	0.879901	0.250495	0.705297	1.04803	0.311398	1.2739	2.04268	1.6563	-0.156259	1.33719	1.90857	0.06725	0.395875	0.87098	0.600751	-0.028655	0.426147	0.76888
NM_013533	Gpr162	H3K4me3-only	0.401164	0.242442	0.358435	0.497124	0.600149	1.00442	0.853364	1.49691	-0.726552	-0.162481	0.309414	0.581129	1.3241	1.08897	1.89972	-0.158722	-0.042729	0.09596	0.198985	0.603256	0.4522	1.09575
NM_011653	Tuba1a	H3K4me3-only	35.5127	39.8641	30.3511	53.5134	82.6306	74.2649	105.043	132.494	0.166755	-0.226586	0.591565	1.21834	1.06435	1.56457	1.89952	4.3514	-5.1616	18.0007	47.1179	38.7522	69.5303	96.9813
NM_026731	Ppp1r14a	H3K4me3-only	1.85906	1.65729	1.34828	2.00531	1.71732	1.85304	4.77669	6.90584	-0.165747	-0.463453	0.109252	-0.114414	-0.00467931	1.36144	1.89324	-0.20177	-0.51078	0.14625	-0.14174	-0.00602	2.91763	5.04678
NM_009902	Cldn3	H3K4me3-only	2.94101	1.95667	1.54385	1.19687	5.32128	3.3719	4.84619	10.9139	-0.587911	-0.929779	-1.29705	0.855462	0.19725	0.720539	1.89178	-0.98434	-1.39716	-1.74414	2.38027	0.43089	1.90518	7.97289
NM_145392	Bag2	H3K4me3-only	1.18106	0.85319	1.36921	1.09041	1.10552	1.6743	2.47462	4.37895	-0.469143	0.213261	-0.115212	-0.0953571	0.503476	1.06712	1.8905	-0.32787	0.18815	-0.09065	-0.07554	0.49324	1.29356	3.19789
NM_019724	Mmp16	H3K4me3-only	0.125219	0.201483	0.220786	0.173516	0.112197	0.0676787	0.203066	0.463263	0.686205	0.818195	0.470615	-0.158419	-0.88768	0.697495	1.88738	0.076264	0.095567	0.048297	-0.013022	-0.0575403	0.077847	0.338044
NM_133186	Steap3	H3K4me3-only	3.128	6.31534	2.98108	6.94695	8.54462	5.57396	6.35738	11.5423	1.01362	-0.0694054	1.15114	1.44978	0.833462	1.02319	1.88362	3.18734	-0.14692	3.81895	5.41662	2.44596	3.22938	8.4143
NM_001166397	Armcx2	H3K4me3-only	2.70005	1.23933	1.41015	1.78924	3.86485	3.36456	4.97572	9.96097	-1.12343	-0.937137	-0.593639	0.517426	0.317432	0.881919	1.8833	-1.46072	-1.2899	-0.91081	1.1648	0.66451	2.27567	7.26092
NM_011213	Ptprf	H3K4me3-only	11.6714	7.17792	9.44388	11.4364	15.4956	29.4448	44.8931	42.9982	-0.70134	-0.305526	-0.0293446	0.408881	1.33504	1.94352	1.8813	-4.49348	-2.22752	-0.235	3.8242	17.7734	33.2217	31.3268
NM_001079824	Hnrnph3	H3K4me3-only	7.60175	6.95617	8.38674	10.2563	11.1217	13.2084	24.9596	27.9282	-0.128038	0.141779	0.432107	0.548974	0.797052	1.71519	1.87732	-0.64558	0.78499	2.65455	3.51995	5.60665	17.3578	20.3265
NM_007496	Zfhx3	H3K4me3-only	0.503379	0.221647	0.322793	0.413172	0.8477	1.56449	1.79629	1.84454	-1.18338	-0.641036	-0.284903	0.751909	1.63598	1.8353	1.87354	-0.281732	-0.180586	-0.090207	0.344321	1.06111	1.29291	1.34116
NM_028036	Tmco6	H3K4me3-only	4.73327	3.03162	4.10129	6.48653	6.77065	4.28925	9.148	17.3196	-0.642748	-0.206759	0.45461	0.516457	-0.142112	0.950619	1.8715	-1.70165	-0.63198	1.75326	2.03738	-0.44402	4.41473	12.5863
NM_021568	Pcbp3	H3K4me3-only	1.95618	1.57399	1.61841	2.18462	3.71074	2.89776	5.98486	7.15442	-0.313613	-0.273462	0.159343	0.923668	0.566899	1.61328	1.8708	-0.38219	-0.33777	0.22844	1.75456	0.94158	4.02868	5.19824
NM_001025365	Miip	H3K4me3-only	3.27631	2.09923	4.47823	4.88427	4.9318	4.37734	6.02446	11.9707	-0.642212	0.450857	0.576071	0.590042	0.417983	0.87876	1.86936	-1.17708	1.20192	1.60796	1.65549	1.10103	2.74815	8.69439
NM_001005426	Zcwpw1	H3K4me3-only	3.99362	3.62803	5.01804	7.50556	13.7315	23.6786	22.0149	14.4742	-0.138511	0.329427	0.910263	1.78172	2.56781	2.46271	1.85771	-0.36559	1.02442	3.51194	9.73788	19.685	18.0213	10.4806
NM_001166398	Armcx2	H3K4me3-only	2.99379	2.56807	0.828115	2.13962	2.35246	4.82472	6.82755	10.8402	-0.221288	-1.85407	-0.484618	-0.347803	0.688472	1.18939	1.85635	-0.42572	-2.16568	-0.85417	-0.64133	1.83093	3.83376	7.84641
NM_198003	Zfp946	H3K4me3-only	2.4752	2.34441	1.97975	2.05621	3.50374	3.76685	5.17783	8.95983	-0.0783202	-0.322227	-0.267557	0.501351	0.605813	1.0648	1.85593	-0.13079	-0.49545	-0.41899	1.02854	1.29165	2.70263	6.48463
NM_028711	Slc25a27	H3K4me3-only	0.595975	0.141883	0.428977	0.620128	0.675081	0.813854	1.12187	2.15268	-2.07055	-0.474352	0.0573142	0.179809	0.449518	0.912582	1.85281	-0.454092	-0.166998	0.024153	0.079106	0.217879	0.525895	1.55671
NM_178799	Acad12	H3K4me3-only	0.649035	0.313266	0.588891	0.750434	0.757469	0.740683	1.12477	2.33455	-1.05091	-0.140296	0.209429	0.222891	0.19056	0.793262	1.84678	-0.335769	-0.060144	0.101399	0.108434	0.091648	0.475735	1.68552
NM_026599	Cgnl1	H3K4me3-only	1.61429	2.74567	3.09772	8.60942	12.3244	21.1888	10.1623	5.77853	0.766258	0.940307	2.41502	2.93255	3.71433	2.65426	1.8398	1.13138	1.48343	6.99513	10.7101	19.5745	8.54801	4.16424
NM_010500	Ier5	H3K4me3-only	1.10068	1.63439	0.807764	0.712466	1.91138	8.03626	6.17104	3.92074	0.570357	-0.446389	-0.627502	0.79622	2.86813	2.48712	1.83273	0.53371	-0.292916	-0.388214	0.8107	6.93558	5.07036	2.82006
NM_001037809	Cdh3	H3K4me3-only	2.66292	1.85368	3.93773	8.80904	8.93726	4.27342	6.12372	9.44515	-0.522617	0.564355	1.72598	1.74682	0.682382	1.2014	1.82656	-0.80924	1.27481	6.14612	6.27434	1.6105	3.4608	6.78223
NM_134188	Acot2	H3K4me3-only	0.754846	0.813719	0.469324	0.572707	0.68365	0.696553	1.93873	2.67635	0.108348	-0.685598	-0.398385	-0.142924	-0.115949	1.36086	1.82601	0.058873	-0.285522	-0.182139	-0.071196	-0.058293	1.18388	1.9215
NM_001256195	Eif4g3	H3K4me3-only	1.22948	1.15296	0.92366	0.537481	0.472266	1.20889	1.55342	4.35574	-0.0927058	-0.412614	-1.19376	-1.38038	-0.0243653	0.3374	1.82487	-0.07652	-0.30582	-0.691999	-0.757214	-0.02059	0.32394	3.12626
NM_026037	Mboat2	H3K4me3-only	3.59636	3.22107	5.33316	4.56512	5.3866	3.35701	8.64841	12.7121	-0.158997	0.568453	0.344115	0.582837	-0.0993606	1.2659	1.82159	-0.37529	1.7368	0.96876	1.79024	-0.23935	5.05205	9.11574
NM_010425	Foxd3	H3K4me3-only	2.91121	7.85577	6.34813	11.2112	13.2223	12.108	10.3583	10.279	1.43213	1.12471	1.94525	2.18328	2.05627	1.8311	1.82001	4.94456	3.43692	8.29999	10.3111	9.19679	7.44709	7.36779
NM_025314	Dtd1	H3K4me3-only	8.41248	7.25903	4.13919	4.70846	8.11071	11.6748	23.9984	29.6752	-0.212754	-1.02318	-0.837276	-0.052703	0.472795	1.51234	1.81865	-1.15345	-4.27329	-3.70402	-0.30177	3.26232	15.5859	21.2627
NM_021465	Stag2	H3K4me3-only	9.07646	8.74871	8.99168	9.99299	17.761	23.4452	22.606	32.0019	-0.0530594	-0.013539	0.138787	0.968511	1.36909	1.3165	1.81796	-0.32775	-0.08478	0.91653	8.68454	14.3687	13.5295	22.9254
NM_025347	Ypel3	H3K4me3-only	9.41038	5.89852	5.85383	5.89144	8.42936	7.46741	19.2039	33.1688	-0.6739	-0.684872	-0.675633	-0.15883	-0.333645	1.02907	1.8175	-3.51186	-3.55655	-3.51894	-0.98102	-1.94297	9.79352	23.7584
NM_023141	Tor3a	H3K4me3-only	1.94995	1.84552	12.8547	11.3139	12.7495	18.1366	13.4327	6.86867	-0.0794098	2.72079	2.53659	2.70893	3.21739	2.78424	1.81659	-0.10443	10.9047	9.36395	10.7995	16.1867	11.4828	4.91872
NM_001033306	Shb	H3K4me3-only	3.00463	1.60785	2.91025	2.37201	3.81398	4.63626	8.5391	10.5487	-0.902055	-0.0460443	-0.341077	0.34411	0.625774	1.5069	1.81181	-1.39678	-0.09438	-0.63262	0.80935	1.63163	5.53447	7.54407
NM_013918	Usp25	H3K4me3-only	1.83838	1.80163	2.3205	1.1395	2.08472	2.92966	4.55583	6.44908	-0.0291323	0.336001	-0.690034	0.181419	0.672298	1.30928	1.81066	-0.03675	0.48212	-0.69888	0.24634	1.09128	2.71745	4.6107
NM_028493	Rhobtb3	H3K4me3-only	4.55108	5.98883	4.90476	4.80197	7.32294	7.22903	9.89586	15.9482	0.396065	0.107974	0.0774174	0.686214	0.667593	1.12062	1.80911	1.43775	0.35368	0.25089	2.77186	2.67795	5.34478	11.3971
NM_133810	Stk17b	H3K4me3-only	4.64178	8.42619	9.45734	7.4138	9.99381	7.52154	9.58591	16.2381	0.860202	1.02676	0.675535	1.10636	0.69635	1.04624	1.80663	3.78441	4.81556	2.77202	5.35203	2.87976	4.94413	11.5963
NM_001103168	Zglp1	H3K4me3-only	0.882819	1.06858	0.452073	1.06224	2.49788	2.28827	4.1985	3.08712	0.275505	-0.965562	0.26692	1.50051	1.37407	2.24968	1.80607	0.185761	-0.430746	0.179421	1.61506	1.40545	3.31568	2.2043
NM_175528	E330009J07Rik	H3K4me3-only	0.916278	0.950258	1.16938	1.58499	1.41335	1.97537	2.68753	3.183	0.0525339	0.351887	0.790616	0.625261	1.10827	1.55242	1.79653	0.03398	0.253102	0.668712	0.497072	1.05909	1.77125	2.26672
NM_176996	Smo	H3K4me3-only	5.01223	4.7083	3.99889	3.79509	5.33697	6.73875	12.5097	17.4021	-0.0902464	-0.325853	-0.401319	0.0905683	0.427028	1.31952	1.79574	-0.30393	-1.01334	-1.21714	0.32474	1.72652	7.49747	12.3899
NM_134050	Rab15	H3K4me3-only	3.55274	3.28101	1.15739	1.24427	5.06606	8.58971	13.3673	12.328	-0.114792	-1.61806	-1.51363	0.511932	1.27368	1.9117	1.79493	-0.27173	-2.39535	-2.30847	1.51332	5.03697	9.81456	8.77526
NM_022987	Zic5	H3K4me3-only	1.9783	3.2719	2.34298	3.12643	6.34511	6.51784	8.11039	6.86043	0.725867	0.244083	0.660255	1.68138	1.72013	2.03551	1.79404	1.2936	0.36468	1.14813	4.36681	4.53954	6.13209	4.88213
NM_010437	Hivep2	H3K4me3-only	0.435783	0.281008	0.641739	0.351567	0.590655	1.15594	1.03925	1.50964	-0.632999	0.558377	-0.30981	0.438706	1.40738	1.25386	1.79252	-0.154775	0.205956	-0.084216	0.154872	0.720157	0.603467	1.07386
NM_013812	Cdk2ap1	H3K4me3-only	4.18851	4.76334	5.58116	8.34471	15.8214	20.1743	22.258	14.4832	0.185536	0.414128	0.994425	1.91737	2.26801	2.40981	1.78987	0.57483	1.39265	4.1562	11.6329	15.9858	18.0695	10.2947
NM_001110337	Gprc5c	H3K4me3-only	1.89167	1.14322	3.64774	3.19467	4.30142	5.03906	5.10183	6.5359	-0.726557	0.947342	0.756006	1.18515	1.41349	1.43135	1.78873	-0.74845	1.75607	1.303	2.40975	3.14739	3.21016	4.64423
NM_029797	Mnd1	H3K4me3-only	14.9721	11.3942	9.74408	13.4462	21.894	24.6552	38.4224	51.443	-0.393977	-0.619679	-0.155078	0.548259	0.719615	1.35967	1.7807	-3.5779	-5.22802	-1.5259	6.9219	9.6831	23.4503	36.4709
NM_134163	Mbnl3	H3K4me3-only	0.237103	0.338785	0.260751	0.26581	0.461962	0.688089	0.790351	0.813688	0.514856	0.137159	0.164881	0.96226	1.53708	1.73698	1.77896	0.101682	0.023648	0.028707	0.224859	0.450986	0.553248	0.576585
NM_177124	Tnrc6b	H3K4me3-only	0.974354	1.08902	1.02089	1.13036	2.16473	2.91837	3.0872	3.33044	0.160513	0.0673095	0.214264	1.15167	1.58264	1.66378	1.77319	0.114666	0.046536	0.156006	1.19038	1.94402	2.11285	2.35609
NM_025273	Pcbd1	H3K4me3-only	2.11413	1.23974	1.7351	1.78353	2.08928	1.88219	5.5562	7.21377	-0.770027	-0.285045	-0.245329	-0.0170582	-0.167652	1.39403	1.77069	-0.87439	-0.37903	-0.3306	-0.02485	-0.23194	3.44207	5.09964
NM_026555	Rcn3	H3K4me3-only	2.83865	3.10716	1.32363	2.05471	3.5177	4.31416	9.51959	9.66685	0.130392	-1.10071	-0.46627	0.309427	0.603875	1.74569	1.76784	0.26851	-1.51502	-0.78394	0.67905	1.47551	6.68094	6.8282
NM_013881	Ulk2	H3K4me3-only	0.800454	0.73449	0.787981	0.457492	0.539094	0.274701	0.638431	2.72347	-0.124076	-0.0226577	-0.807072	-0.570282	-1.54296	-0.326288	1.76656	-0.065964	-0.012473	-0.342962	-0.26136	-0.525753	-0.162023	1.92302
NR_045709	1700007L15Rik	H3K4me3-only	1.71451	1.96872	2.68663	2.5856	4.10716	4.48495	5.47631	5.82051	0.199462	0.648001	0.592703	1.26034	1.3873	1.67541	1.76335	0.25421	0.97212	0.87109	2.39265	2.77044	3.7618	4.106
NM_001081189	Uprt	H3K4me3-only	0.968295	0.644186	1.45676	1.53429	1.88354	1.36826	1.73513	3.27339	-0.587969	0.589245	0.664053	0.959928	0.498824	0.841525	1.75727	-0.324109	0.488465	0.565995	0.915245	0.399965	0.766835	2.3051
NM_173765	Aasdh	H3K4me3-only	2.13337	1.27178	1.16945	1.24362	2.44988	3.1881	5.79134	7.20798	-0.746285	-0.867304	-0.778588	0.199577	0.579563	1.44076	1.75646	-0.86159	-0.96392	-0.88975	0.31651	1.05473	3.65797	5.07461
NM_008087	Gas2	H3K4me3-only	0.630046	0.484426	0.238582	0.472087	1.09121	0.884004	1.81441	2.12791	-0.379181	-1.40097	-0.416404	0.7924	0.488596	1.52597	1.75591	-0.14562	-0.391464	-0.157959	0.461164	0.253958	1.18436	1.49786
NM_001080930	Atxn1l	H3K4me3-only	1.92221	1.94144	1.77476	1.24587	1.27639	2.41372	3.32494	6.48681	0.0143612	-0.115142	-0.625612	-0.590697	0.328492	0.790562	1.75474	0.01923	-0.14745	-0.67634	-0.64582	0.49151	1.40273	4.5646
NM_146174	Fam115c	H3K4me3-only	0.304554	0.512817	0.491224	0.370729	0.376355	0.319209	0.453679	1.02675	0.751746	0.689683	0.283667	0.305396	0.0678033	0.574974	1.75331	0.208263	0.18667	0.066175	0.071801	0.014655	0.149125	0.722196
NM_013505	Dsc2	H3K4me3-only	0.579239	0.720697	0.557162	0.235182	0.174238	0.227289	0.744326	1.95269	0.315234	-0.0560619	-1.30038	-1.7331	-1.34963	0.361776	1.75323	0.141458	-0.022077	-0.344057	-0.405001	-0.35195	0.165087	1.37345
NM_021284	Kras	H3K4me3-only	9.31834	8.10515	7.94376	7.77098	14.0083	19.3746	31.9255	31.0817	-0.201234	-0.230251	-0.261976	0.588137	1.05602	1.77656	1.73792	-1.21319	-1.37458	-1.54736	4.68996	10.0563	22.6072	21.7634
NM_007498	Atf3	H3K4me3-only	2.09605	6.66345	0.11588	0.146116	0.343721	0.336116	4.47926	6.98446	1.6686	-4.17697	-3.84249	-2.60836	-2.64064	1.09559	1.73648	4.5674	-1.98017	-1.94993	-1.75233	-1.75993	2.38321	4.88841
NM_001033385	D630037F22Rik	H3K4me3-only	0.882878	0.724364	0.873353	0.876732	0.748359	0.943883	1.655	2.93268	-0.285499	-0.0156492	-0.0100782	-0.238484	0.0963939	0.906545	1.73193	-0.158514	-0.009525	-0.006146	-0.134519	0.061005	0.772122	2.0498
NM_011787	Amfr	H3K4me3-only	5.42736	6.63789	9.47031	5.95463	9.22033	8.19667	12.5557	17.9832	0.290474	0.803161	0.133761	0.764568	0.594787	1.21002	1.72833	1.21053	4.04295	0.52727	3.79297	2.76931	7.12834	12.5558
NM_001166453	Pls3	H3K4me3-only	8.07876	7.21964	5.0215	5.81714	11.9818	11.4931	10.9966	26.5402	-0.162207	-0.686015	-0.473824	0.568639	0.508562	0.444852	1.71597	-0.85912	-3.05726	-2.26162	3.90304	3.41434	2.91784	18.4614
NM_001039090	Skil	H3K4me3-only	7.84429	7.81563	6.58541	8.37592	25.4394	32.8307	32.2586	25.7197	-0.0052807	-0.25237	0.0946048	1.69735	2.06533	2.03997	1.71316	-0.02866	-1.25888	0.53163	17.5951	24.9864	24.4143	17.8754
NM_145840	Rgs9bp	H3K4me3-only	0.822979	0.491901	0.469674	0.441976	0.829105	0.713066	1.55757	2.69803	-0.742488	-0.809196	-0.896888	0.0106992	-0.20682	0.920369	1.71298	-0.331078	-0.353305	-0.381003	0.006126	-0.109913	0.734591	1.87505
NM_025399	Nudt14	H3K4me3-only	9.19349	7.52494	8.44585	9.2277	13.8591	12.2014	25.0654	29.9975	-0.288933	-0.12237	0.00535847	0.592149	0.408362	1.44701	1.70616	-1.66855	-0.74764	0.03421	4.66561	3.00791	15.8719	20.804
NM_001001491	Tpm4	H3K4me3-only	32.3788	38.7483	42.5802	26.0952	36.2002	32.9495	53.4879	105.541	0.259083	0.395133	-0.311265	0.160948	0.0252071	0.724163	1.70468	6.3695	10.2014	-6.2836	3.8214	0.5707	21.1091	73.1622
NM_001099631	Sh2d5	H3K4me3-only	0.381361	0.129117	0.143251	0.240004	0.490523	1.596	1.34339	1.23942	-1.56248	-1.41261	-0.668099	0.363163	2.06523	1.81665	1.70044	-0.252244	-0.23811	-0.141357	0.109162	1.21464	0.962029	0.858059
NM_001081557	Camta1	H3K4me3-only	0.516996	0.466585	0.477319	0.501972	0.63356	0.367752	0.48124	1.67666	-0.148013	-0.115199	-0.0425462	0.293328	-0.49142	-0.103397	1.69737	-0.050411	-0.039677	-0.015024	0.116564	-0.149244	-0.035756	1.15966
NM_001012336	Mdk	H3K4me3-only	40.3275	37.9914	23.3551	32.9523	70.3846	84.1919	157.123	130.035	-0.0860911	-0.788026	-0.291385	0.803496	1.06192	1.96206	1.68906	-2.3361	-16.9724	-7.3752	30.0571	43.8644	116.795	89.7075
NM_001143689	H2-Q4	H3K4me3-only	1.26504	0.833557	0.735116	1.18865	1.65762	1.75796	4.10601	4.06536	-0.60183	-0.783139	-0.089859	0.38993	0.474719	1.69855	1.6842	-0.431483	-0.529924	-0.07639	0.39258	0.49292	2.84097	2.80032
NM_025921	2610002M06Rik	H3K4me3-only	0.729655	0.702984	1.12509	1.01979	1.47998	1.2009	1.34259	2.33802	-0.0537226	0.624754	0.482986	1.02029	0.71883	0.879732	1.68	-0.026671	0.395435	0.290135	0.750325	0.471245	0.612935	1.60837
NM_026162	Plxdc2	H3K4me3-only	1.41968	1.48923	1.38059	1.99102	2.19712	2.1455	3.60828	4.54831	0.0690008	-0.0402808	0.487942	0.630048	0.595748	1.34575	1.67976	0.06955	-0.03909	0.57134	0.77744	0.72582	2.1886	3.12863
NM_001081344	Stxbp5	H3K4me3-only	0.6297	0.577108	0.653482	0.444395	0.442085	0.454415	0.996963	2.01084	-0.125823	0.0534828	-0.502822	-0.510341	-0.470654	0.662875	1.67506	-0.052592	0.023782	-0.185305	-0.187615	-0.175285	0.367263	1.38114
NM_145492	Zfp521	H3K4me3-only	0.375978	0.22674	0.0890345	0.0552298	0.0173107	0.0404111	0.160277	1.20033	-0.729609	-2.07821	-2.76713	-4.44091	-3.21782	-1.23008	1.67471	-0.149238	-0.286943	-0.320748	-0.358667	-0.335567	-0.215701	0.824352
NM_011514	Suv39h1	H3K4me3-only	2.52971	3.12659	3.34361	1.69283	1.48265	7.14322	8.51898	8.0434	0.305618	0.402435	-0.579535	-0.770794	1.4976	1.75171	1.66883	0.59688	0.8139	-0.83688	-1.04706	4.61351	5.98927	5.51369
NM_175465	Sestd1	H3K4me3-only	1.31043	1.12775	1.26623	1.14589	3.00069	3.80011	3.81316	4.16365	-0.216593	-0.0495008	-0.193572	1.19525	1.536	1.54095	1.66781	-0.18268	-0.0442	-0.16454	1.69026	2.48968	2.50273	2.85322
NM_019550	Ptbp2	H3K4me3-only	8.68645	11.1782	16.9242	9.97268	8.75822	14.4217	15.9714	27.4906	0.363849	0.962249	0.199215	0.011871	0.731403	0.878652	1.6621	2.49175	8.23775	1.28623	0.07177	5.73525	7.28495	18.8041
NM_010227	Flna	H3K4me3-only	39.594	37.3561	46.6458	52.2176	58.7868	62.1834	69.3395	125.188	-0.083938	0.236465	0.399254	0.57021	0.651248	0.808396	1.66074	-2.2379	7.0518	12.6236	19.1928	22.5894	29.7455	85.594
NM_153791	Flywch1	H3K4me3-only	4.28068	3.15794	3.04172	4.13643	7.12384	13.0388	15.1476	13.5322	-0.438856	-0.492953	-0.0494538	0.734815	1.6069	1.82318	1.66048	-1.12274	-1.23896	-0.14425	2.84316	8.75812	10.8669	9.25152
NM_177129	Cntn2	H3K4me3-only	0.273565	0.170659	0.102789	0.2223	0.141929	0.628298	0.852199	0.861177	-0.680767	-1.4122	-0.299376	-0.946714	1.19957	1.63931	1.65443	-0.102906	-0.170776	-0.051265	-0.131636	0.354733	0.578634	0.587612
NM_016966	Phgdh	H3K4me3-only	32.7564	25.1131	22.9448	17.1955	20.5117	25.8419	84.3605	102.604	-0.383337	-0.51361	-0.929746	-0.67533	-0.342065	1.36479	1.64724	-7.6433	-9.8116	-15.5609	-12.2447	-6.9145	51.6041	69.8476
NM_001083334	Bin1	H3K4me3-only	2.60743	2.71709	4.38129	9.77937	18.6084	9.33197	8.24776	8.16723	0.0594338	0.748727	1.90711	2.83525	1.83955	1.66137	1.64722	0.10966	1.77386	7.17194	16.001	6.72454	5.64033	5.5598
NM_026473	Tubb6	H3K4me3-only	26.7602	30.4655	32.4864	30.0478	37.8312	30.4412	57.0688	83.699	0.187088	0.279747	0.16717	0.499488	0.185936	1.09261	1.64512	3.7053	5.7262	3.2876	11.071	3.681	30.3086	56.9388
NM_148941	Elovl4	H3K4me3-only	1.15002	1.58135	0.871324	0.629331	0.677248	0.76667	3.56153	3.5872	0.459498	-0.400378	-0.869768	-0.763903	-0.584981	1.63084	1.6412	0.43133	-0.278696	-0.520689	-0.472772	-0.38335	2.41151	2.43718
NM_175318	Spty2d1	H3K4me3-only	2.82112	4.99004	2.94023	2.41334	3.31757	7.46715	8.58932	8.77221	0.822783	0.059661	-0.225237	0.233859	1.40429	1.60628	1.63667	2.16892	0.11911	-0.40778	0.49645	4.64603	5.7682	5.95109
NM_181409	Mtmr11	H3K4me3-only	0.74352	0.484593	0.491326	1.05823	0.975712	0.716016	1.39944	2.30693	-0.617598	-0.597691	0.50921	0.392084	-0.0543797	0.912406	1.63353	-0.258927	-0.252194	0.31471	0.232192	-0.027504	0.65592	1.56341
NM_020267	Trim44	H3K4me3-only	5.23706	6.93302	22.0834	22.3299	26.2841	17.9822	14.7542	16.2377	0.404727	2.07613	2.09215	2.32736	1.77974	1.4943	1.63252	1.69596	16.8463	17.0928	21.047	12.7451	9.51714	11.0006
NM_026025	Zcrb1	H3K4me3-only	9.78264	8.51891	7.04891	4.37263	7.6496	28.2734	28.2573	30.3277	-0.199555	-0.472824	-1.16172	-0.35484	1.53115	1.53033	1.63234	-1.26373	-2.73373	-5.41001	-2.13304	18.4908	18.4747	20.5451
NM_178679	Zfp365	H3K4me3-only	2.83469	1.87082	2.71602	4.76768	4.82228	4.88248	7.93195	8.75375	-0.59952	-0.0616969	0.750096	0.766524	0.784423	1.48448	1.62671	-0.96387	-0.11867	1.93299	1.98759	2.04779	5.09726	5.91906
NM_026977	Cnppd1	H3K4me3-only	2.44592	2.51443	2.16864	1.31131	1.32825	1.03725	3.6856	7.54298	0.0398542	-0.173587	-0.899368	-0.880851	-1.23761	0.591522	1.62476	0.06851	-0.27728	-1.13461	-1.11767	-1.40867	1.23968	5.09706
NM_028643	Micu2	H3K4me3-only	3.22534	3.9956	3.2304	3.41009	4.22078	3.54241	4.83321	9.94648	0.308961	0.00226157	0.0803586	0.388058	0.13528	0.58353	1.62473	0.77026	0.00506	0.18475	0.99544	0.31707	1.60787	6.72114
NM_011207	Ptpn3	H3K4me3-only	3.00983	2.24716	5.40835	5.89221	6.76219	10.2012	10.0483	9.21047	-0.421579	0.845507	0.969127	1.16781	1.76098	1.7392	1.61359	-0.76267	2.39852	2.88238	3.75236	7.19137	7.03847	6.20064
NM_173784	Ubtd2	H3K4me3-only	3.17884	3.60141	4.0958	4.40257	7.50633	7.77236	8.94905	9.71955	0.180061	0.365645	0.469846	1.23961	1.28985	1.49323	1.61239	0.42257	0.91696	1.22373	4.32749	4.59352	5.77021	6.54071
NM_010380	H2-D1	H3K4me3-only	3.41086	3.39109	2.62884	3.95946	6.19467	4.93883	10.6532	10.4105	-0.00838647	-0.375709	0.215168	0.860892	0.534034	1.64308	1.60983	-0.01977	-0.78202	0.5486	2.78381	1.52797	7.24234	6.99964
NM_183308	Pon2	H3K4me3-only	1.29271	1.77996	3.86683	3.89948	3.02774	2.58814	3.16405	3.93607	0.461446	1.58075	1.59288	1.22784	1.00152	1.29137	1.60636	0.48725	2.57412	2.60677	1.73503	1.29543	1.87134	2.64336
NM_172546	Cnksr3	H3K4me3-only	3.09865	2.64168	2.00936	1.84148	5.17514	8.23657	8.35708	9.37211	-0.230184	-0.624904	-0.750774	0.739958	1.4104	1.43136	1.59673	-0.45697	-1.08929	-1.25717	2.07649	5.13792	5.25843	6.27346
NM_008029	Flt4	H3K4me3-only	0.462847	0.428651	0.33251	0.351022	0.327404	0.723707	0.90769	1.39751	-0.110732	-0.477138	-0.398974	-0.499463	0.64487	0.971664	1.59425	-0.034196	-0.130337	-0.111825	-0.135443	0.26086	0.444843	0.934663
NM_027117	Klhdc2	H3K4me3-only	15.436	13.8347	15.3842	9.4539	12.9595	16.4763	32.3995	46.4635	-0.158008	-0.00484953	-0.707317	-0.252289	0.0940934	1.06967	1.5898	-1.6013	-0.0518	-5.9821	-2.4765	1.0403	16.9635	31.0275
NM_010928	Notch2	H3K4me3-only	3.72785	3.34722	2.9966	2.76038	3.09418	6.50137	7.78166	11.1984	-0.15538	-0.315017	-0.433477	-0.268787	0.8024	1.06173	1.58688	-0.38063	-0.73125	-0.96747	-0.63367	2.77352	4.05381	7.47055
NM_016768	Pbx3	H3K4me3-only	1.94383	1.43652	1.31564	1.31655	2.66371	3.00221	5.33168	5.82081	-0.436324	-0.563137	-0.56214	0.454535	0.627123	1.45569	1.58232	-0.50731	-0.62819	-0.62728	0.71988	1.05838	3.38785	3.87698
NM_019681	Ncs1	H3K4me3-only	1.76342	2.52277	1.09533	0.976999	1.18439	2.50888	4.9772	5.2326	0.516633	-0.687011	-0.851947	-0.574232	0.508667	1.49696	1.56915	0.75935	-0.66809	-0.786421	-0.57903	0.74546	3.21378	3.46918
NM_001123327	Qser1	H3K4me3-only	4.72972	3.02039	3.44039	4.76045	13.1364	20.2092	12.2857	13.8802	-0.64702	-0.459183	0.00934318	1.47374	2.09519	1.37715	1.5532	-1.70933	-1.28933	0.03073	8.40668	15.4795	7.55598	9.15048
NM_009574	Zic2	H3K4me3-only	8.74421	15.2125	10.9717	13.6018	23.3407	17.7686	26.225	25.6404	0.798857	0.327387	0.637398	1.41645	1.02293	1.58454	1.55202	6.46829	2.22749	4.85759	14.5965	9.02439	17.4808	16.8962
NM_027810	Bbs7	H3K4me3-only	1.2462	1.24701	0.940327	1.38483	2.1324	1.26446	1.8676	3.63367	0.000937412	-0.406301	0.152173	0.774942	0.0209858	0.58365	1.54389	0.00081	-0.305873	0.13863	0.8862	0.01826	0.6214	2.38747
NM_030113	Arhgap10	H3K4me3-only	1.94089	2.18947	4.24445	3.71137	3.73427	3.51093	4.88929	5.64519	0.173863	1.12886	0.935233	0.944108	0.855135	1.33291	1.5403	0.24858	2.30356	1.77048	1.79338	1.57004	2.9484	3.7043
NM_001024539	Shc2	H3K4me3-only	1.38934	0.808516	0.298237	0.305798	0.404424	0.707094	1.97404	4.04021	-0.781051	-2.21987	-2.18375	-1.78046	-0.974426	0.506752	1.54003	-0.580824	-1.0911	-1.08354	-0.984916	-0.682246	0.5847	2.65087
NM_133764	Atp6v0e2	H3K4me3-only	2.22343	1.44727	2.33903	1.74866	1.96189	2.56882	4.52208	6.46038	-0.619453	0.0731234	-0.346537	-0.180543	0.208319	1.0242	1.53883	-0.77616	0.1156	-0.47477	-0.26154	0.34539	2.29865	4.23695
NM_008081	B4galnt2	H3K4me3-only	0.688094	0.477415	0.0755277	0.0485333	0.0458378	0.0205934	0.847664	1.9945	-0.527362	-3.18753	-3.82556	-3.908	-5.06235	0.300887	1.53535	-0.210679	-0.612566	-0.639561	-0.642256	-0.667501	0.15957	1.30641
NM_025351	Chchd6	H3K4me3-only	7.10717	5.89927	5.21866	7.42746	9.43377	10.8928	18.1702	20.5942	-0.268739	-0.445596	0.0635937	0.408559	0.616028	1.35423	1.53489	-1.2079	-1.88851	0.32029	2.3266	3.78563	11.063	13.487
NR_015555	4933404O12Rik	H3K4me3-only	2.2064	1.06468	1.24195	2.3325	3.49485	4.72759	5.32017	6.37879	-1.05127	-0.829087	0.0801827	0.663536	1.09941	1.26978	1.53159	-1.14172	-0.96445	0.1261	1.28845	2.52119	3.11377	4.17239
NM_178609	E2f7	H3K4me3-only	1.3207	1.09083	1.64232	1.93972	3.0063	3.91482	3.94269	3.81101	-0.275877	0.314432	0.554546	1.18669	1.56764	1.57788	1.52887	-0.22987	0.32162	0.61902	1.6856	2.59412	2.62199	2.49031
NM_011400	Slc2a1	H3K4me3-only	75.9633	43.8065	58.3897	46.767	71.6958	67.9438	78.7987	218.841	-0.794158	-0.379589	-0.699812	-0.083414	-0.160961	0.0528692	1.52651	-32.1568	-17.5736	-29.1963	-4.2675	-8.0195	2.8354	142.878
NM_010153	Erbb3	H3K4me3-only	4.50724	3.84562	16.1132	7.2977	6.81275	4.44877	5.41023	12.9394	-0.229028	1.83793	0.695198	0.595993	-0.0188378	0.263446	1.52145	-0.66162	11.606	2.79046	2.30551	-0.05847	0.90299	8.43216
NM_027642	Phf6	H3K4me3-only	3.32729	3.39339	20.8401	22.3156	16.3715	9.0414	9.87662	9.55145	0.0283796	2.64694	2.74563	2.29877	1.4422	1.56967	1.52137	0.0661	17.5128	18.9883	13.0442	5.71411	6.54933	6.22416
NM_001122893	Fyn	H3K4me3-only	3.12059	3.3409	2.58766	2.13175	2.12686	1.69627	5.2252	8.93177	0.098418	-0.270171	-0.549781	-0.553094	-0.879453	0.743667	1.51713	0.22031	-0.53293	-0.98884	-0.99373	-1.42432	2.10461	5.81118
NM_010162	Ext1	H3K4me3-only	7.39738	7.69371	23.5314	23.006	21.9721	15.9623	15.4154	21.1168	0.0566651	1.6695	1.63692	1.57059	1.10958	1.05929	1.5133	0.29633	16.134	15.6086	14.5747	8.56492	8.01802	13.7194
NM_177224	Chd9	H3K4me3-only	5.29616	3.67103	5.83413	8.3692	12.4518	17.7297	17.144	15.0514	-0.528762	0.139571	0.660143	1.23334	1.74315	1.69469	1.50688	-1.62513	0.53797	3.07304	7.15564	12.4335	11.8478	9.75524
NM_001048208	Med14	H3K4me3-only	1.44916	1.44706	2.02493	1.48941	4.07448	5.21499	4.16741	4.11764	-0.00209215	0.482655	0.0395241	1.4914	1.84745	1.52393	1.5066	-0.0021	0.57577	0.04025	2.62532	3.76583	2.71825	2.66848
NM_026163	Pkp2	H3K4me3-only	7.51041	7.36584	9.98466	15.1652	29.0893	26.6134	21.6113	21.334	-0.0280416	0.410822	1.0138	1.95353	1.82519	1.52482	1.50619	-0.14457	2.47425	7.65479	21.5789	19.103	14.1009	13.8236
NM_027444	Bbx	H3K4me3-only	3.83075	3.8015	14.7892	11.4909	9.55533	7.12262	8.17239	10.8383	-0.0110581	1.94885	1.58479	1.31868	0.894781	1.09313	1.50044	-0.02925	10.9584	7.66015	5.72458	3.29187	4.34164	7.00755
NM_001038653	Slc16a3	H3K4me3-only	13.5119	5.53861	0.579585	9.61304	79.5146	114.024	83.3281	38.0866	-1.28663	-4.54307	-0.491166	2.55699	3.07704	2.62457	1.49505	-7.97329	-12.9323	-3.89886	66.0027	100.512	69.8162	24.5747
NM_145491	Rhoq	H3K4me3-only	2.23531	1.32091	0.736713	0.69055	0.650352	0.505676	1.71411	6.29604	-0.758943	-1.6013	-1.69466	-1.78118	-2.14419	-0.383015	1.49397	-0.9144	-1.4986	-1.54476	-1.58496	-1.72963	-0.5212	4.06073
NM_021409	Pard6b	H3K4me3-only	3.22826	2.25699	3.23869	3.33752	4.26137	6.65206	8.47542	9.05045	-0.516357	0.00465361	0.0480197	0.400561	1.04304	1.39253	1.48723	-0.97127	0.01043	0.10926	1.03311	3.4238	5.24716	5.82219
NM_026592	B230118H07Rik	H3K4me3-only	1.85075	1.94211	2.40769	2.53877	3.27102	3.53641	4.51832	5.16027	0.0695149	0.37954	0.45602	0.821631	0.934176	1.28768	1.47934	0.09136	0.55694	0.68802	1.42027	1.68566	2.66757	3.30952
NM_172964	Arhgap28	H3K4me3-only	2.49395	2.21218	2.59223	2.84616	3.85728	4.20361	5.07553	6.93937	-0.172964	0.0557612	0.190584	0.629151	0.753196	1.02513	1.47637	-0.28177	0.09828	0.35221	1.36333	1.70966	2.58158	4.44542
NM_025437	Eif1ax	H3K4me3-only	69.7666	79.6962	81.6737	79.518	124.48	156.945	214.609	194.006	0.191974	0.227335	0.188745	0.835306	1.16965	1.6211	1.47549	9.9296	11.9071	9.7514	54.7134	87.1784	144.842	124.239
NM_001080808	Ccdc64	H3K4me3-only	2.51629	1.69285	1.61628	2.29042	3.45414	3.72965	3.88733	6.96502	-0.571844	-0.638621	-0.135686	0.457028	0.567742	0.627481	1.46883	-0.82344	-0.90001	-0.22587	0.93785	1.21336	1.37104	4.44873
NR_030694	1110002L01Rik	H3K4me3-only	3.82141	1.78705	2.98385	4.97341	8.42872	12.0491	12.5357	10.5465	-1.09653	-0.35693	0.38013	1.14121	1.65675	1.71387	1.46459	-2.03436	-0.83756	1.152	4.60731	8.22769	8.71429	6.72509
NM_001015099	G2e3	H3K4me3-only	6.5347	5.6989	8.55759	8.573	19.4049	22.9742	20.0223	18.0099	-0.197438	0.389084	0.391679	1.57023	1.81382	1.61541	1.4626	-0.8358	2.02289	2.0383	12.8702	16.4395	13.4876	11.4752
NM_026981	Dtwd1	H3K4me3-only	4.26924	2.93848	6.48312	4.66229	6.31778	8.09791	14.8917	11.7298	-0.538909	0.602709	0.127059	0.565438	0.92357	1.80246	1.45813	-1.33076	2.21388	0.39305	2.04854	3.82867	10.6225	7.46056
NM_172503	Zswim4	H3K4me3-only	4.9903	5.25292	8.56	6.64264	7.11388	9.75304	10.9012	13.7001	0.0739931	0.778484	0.41263	0.51151	0.966725	1.12729	1.45699	0.26262	3.5697	1.65234	2.12358	4.76274	5.9109	8.7098
NM_022032	Perp	H3K4me3-only	2.35094	1.93836	6.83509	2.01436	2.19023	1.02887	3.30201	6.45207	-0.278401	1.53972	-0.222916	-0.102155	-1.19218	0.490107	1.45652	-0.41258	4.48415	-0.33658	-0.16071	-1.32207	0.95107	4.10113
NM_183276	Nbeal2	H3K4me3-only	0.690318	0.491837	0.661272	0.961972	1.22844	1.67343	1.85474	1.89193	-0.489081	-0.0620173	0.478734	0.831494	1.27748	1.42588	1.45453	-0.198481	-0.029046	0.271654	0.538122	0.983112	1.16442	1.20161
NM_026967	Rhebl1	H3K4me3-only	10.9005	9.65537	16.7416	16.4332	20.2738	20.2394	33.3908	29.8682	-0.174991	0.619043	0.592219	0.895222	0.892772	1.61506	1.45422	-1.24513	5.8411	5.5327	9.3733	9.3389	22.4903	18.9677
NM_172668	Lrp4	H3K4me3-only	1.49339	1.00502	0.982093	0.710578	0.784824	1.22126	2.19322	4.08817	-0.571367	-0.604659	-1.07153	-0.92815	-0.290221	0.55446	1.45286	-0.48837	-0.511297	-0.782812	-0.708566	-0.27213	0.69983	2.59478
NM_178218	Hist3h2a	H3K4me3-only	172.526	68.7993	86.4576	70.4837	105.224	197.702	453.868	470.425	-1.32635	-0.996749	-1.29145	-0.71335	0.196514	1.39546	1.44715	-103.727	-86.0684	-102.042	-67.302	25.176	281.342	297.899
NM_026203	Ahi1	H3K4me3-only	1.70711	1.31356	1.2534	2.10608	2.63241	2.96183	2.78304	4.64384	-0.378074	-0.445709	0.303004	0.624828	0.794933	0.705106	1.44376	-0.39355	-0.45371	0.39897	0.9253	1.25472	1.07593	2.93673
NM_175485	Prtg	H3K4me3-only	5.96227	4.54728	3.57047	3.0166	2.39245	5.81617	10.184	16.2028	-0.390858	-0.739748	-0.982938	-1.31737	-0.0357923	0.772371	1.44231	-1.41499	-2.3918	-2.94567	-3.56982	-0.1461	4.22173	10.2405
NM_009801	Car2	H3K4me3-only	19.0684	23.7481	105.941	82.987	86.9459	118.476	84.9837	51.7412	0.316628	2.47401	2.1217	2.18893	2.63534	2.156	1.44013	4.6797	86.8726	63.9186	67.8775	99.4076	65.9153	32.6728
NM_011162	Mapk8ip1	H3K4me3-only	2.83341	2.19885	2.5395	4.35	6.6739	5.01656	7.90438	7.68484	-0.36579	-0.157995	0.618476	1.23599	0.824159	1.48011	1.43948	-0.63456	-0.29391	1.51659	3.84049	2.18315	5.07097	4.85143
NM_001038018	Grk6	H3K4me3-only	11.7652	9.94987	14.6771	13.8756	19.2267	19.6037	26.1479	31.8132	-0.241776	0.319041	0.238024	0.708585	0.7366	1.15217	1.4351	-1.81533	2.9119	2.1104	7.4615	7.8385	14.3827	20.048
NM_030014	Hook1	H3K4me3-only	11.9384	12.6587	16.8691	18.7553	26.525	27.9288	26.2082	32.1316	0.0845198	0.498774	0.651689	1.15174	1.22614	1.13441	1.42838	0.7203	4.9307	6.8169	14.5866	15.9904	14.2698	20.1932
NM_008815	Etv4	H3K4me3-only	8.21986	9.89238	40.2813	51.1075	34.5929	19.5305	28.766	22.0968	0.267204	2.29292	2.63635	2.07329	1.24854	1.80718	1.42665	1.67252	32.0614	42.8876	26.373	11.3106	20.5461	13.8769
NM_001160345	Svip	H3K4me3-only	1.88949	1.53816	1.65169	1.99056	3.15515	2.27493	4.38989	5.07754	-0.296791	-0.194054	0.0751775	0.739712	0.267825	1.21619	1.42613	-0.35133	-0.2378	0.10107	1.26566	0.38544	2.5004	3.18805
NM_026582	Wls	H3K4me3-only	3.38778	3.60826	1.75596	1.72613	1.07977	0.52546	2.57923	9.09097	0.0909631	-0.94808	-0.972799	-1.64962	-2.68869	-0.3934	1.42409	0.22048	-1.63182	-1.66165	-2.30801	-2.86232	-0.80855	5.70319
NM_024250	Phf10	H3K4me3-only	35.7578	25.5726	23.9267	24.8241	37.322	29.2874	62.2418	95.4563	-0.483659	-0.579637	-0.526517	0.0617683	-0.287978	0.799626	1.41658	-10.1852	-11.8311	-10.9337	1.5642	-6.4704	26.484	59.6985
NM_021391	Ppp1r1a	H3K4me3-only	3.68115	3.0118	3.18132	6.40446	11.6323	10.2451	13.4542	9.81559	-0.289531	-0.210531	0.79892	1.65991	1.47671	1.86983	1.41492	-0.66935	-0.49983	2.72331	7.95115	6.56395	9.77305	6.13444
NM_134079	Adk	H3K4me3-only	14.3878	14.5902	11	16.8928	38.1618	52.3113	57.1899	38.329	0.0201536	-0.387342	0.231562	1.40728	1.86228	1.99091	1.41359	0.2024	-3.3878	2.505	23.774	37.9235	42.8021	23.9412
NM_178197	Hist1h2bh	H3K4me3-only	85.5214	39.5436	75.8624	113.76	157.322	207.621	326.146	227.132	-1.11284	-0.1729	0.411636	0.879363	1.27959	1.93116	1.40917	-45.9778	-9.659	28.2386	71.8006	122.1	240.625	141.611
NM_009879	Ift81	H3K4me3-only	3.39391	2.18554	2.84859	2.83288	1.85238	2.53588	5.85893	9.00275	-0.634959	-0.2527	-0.260679	-0.873568	-0.420462	0.787689	1.40742	-1.20837	-0.54532	-0.56103	-1.54153	-0.85803	2.46502	5.60884
NM_028820	1700017B05Rik	H3K4me3-only	4.30348	3.30977	5.7598	5.13802	7.07967	9.65221	12.8359	11.4132	-0.378773	0.420515	0.255709	0.718178	1.16536	1.57661	1.40713	-0.99371	1.45632	0.83454	2.77619	5.34873	8.53242	7.10972
NM_029352	Dusp9	H3K4me3-only	9.61496	15.3894	7.1187	10.2409	22.1967	35.8013	61.5726	25.4858	0.678584	-0.433667	0.0909897	1.20699	1.89666	2.67894	1.40634	5.77444	-2.49626	0.62594	12.5817	26.1863	51.9576	15.8708
NM_009101	Rras	H3K4me3-only	6.07164	3.98726	2.5634	2.89649	3.49509	2.66129	5.75169	16.0743	-0.606689	-1.24403	-1.06778	-0.796757	-1.18996	-0.0781003	1.4046	-2.08438	-3.50824	-3.17515	-2.57655	-3.41035	-0.31995	10.0027
NM_026929	Chac1	H3K4me3-only	11.2399	3.23365	0.545305	0.716403	4.70318	2.68016	37.311	29.675	-1.79739	-4.36542	-3.97171	-1.25692	-2.06824	1.73097	1.40062	-8.00625	-10.6946	-10.5235	-6.53672	-8.55974	26.0711	18.4351
NM_027629	Pgm2l1	H3K4me3-only	0.806009	1.15487	1.66131	1.66245	2.55195	2.64802	1.69524	2.10448	0.518863	1.04345	1.04444	1.66273	1.71605	1.07262	1.3846	0.348861	0.855301	0.856441	1.74594	1.84201	0.889231	1.29847
NM_007453	Prdx6	H3K4me3-only	44.5431	81.0091	101.587	103.124	112.251	156.853	132.393	116.298	0.862882	1.18944	1.21111	1.33345	1.81614	1.57155	1.38455	36.466	57.0439	58.5809	67.7079	112.31	87.8499	71.7549
NM_028639	Ttc7	H3K4me3-only	2.30309	1.03872	0.367258	0.587861	0.702049	0.839735	2.87268	6.01281	-1.14876	-2.6487	-1.97002	-1.71393	-1.45556	0.318827	1.38447	-1.26437	-1.93583	-1.71523	-1.60104	-1.46335	0.56959	3.70972
NM_001081750	Zfp664	H3K4me3-only	10.8448	8.19367	11.0932	9.70843	12.3954	22.1733	24.156	28.2997	-0.404422	0.0326721	-0.159694	0.192801	1.03182	1.15538	1.38378	-2.65113	0.2484	-1.13637	1.5506	11.3285	13.3112	17.4549
NM_028162	Tbc1d5	H3K4me3-only	1.60171	1.53413	0.799994	1.1785	1.18799	2.05605	3.60511	4.17558	-0.0621922	-1.00155	-0.442661	-0.43109	0.360262	1.17043	1.38236	-0.06758	-0.801716	-0.42321	-0.41372	0.45434	2.0034	2.57387
NM_001037812	Tmem237	H3K4me3-only	4.37645	3.14394	3.04907	3.93786	4.4507	3.392	8.66551	11.3412	-0.477187	-0.521392	-0.152349	0.0242712	-0.367625	0.985524	1.37374	-1.23251	-1.32738	-0.43859	0.07425	-0.98445	4.28906	6.96475
NM_183138	Tet3	H3K4me3-only	0.839918	0.511338	0.507779	0.492878	0.835141	1.64295	1.83095	2.1731	-0.715971	-0.726048	-0.769018	-0.00822869	0.967968	1.12427	1.37143	-0.32858	-0.332139	-0.34704	-0.004777	0.803032	0.991032	1.33318
NM_145958	Kbtbd2	H3K4me3-only	12.2614	19.0501	12.1523	9.21111	11.5084	13.5386	14.8967	31.6818	0.635675	-0.0128943	-0.412677	-0.0914364	0.142955	0.280869	1.36953	6.7887	-0.1091	-3.05029	-0.753	1.2772	2.6353	19.4204
NM_177192	Dennd5b	H3K4me3-only	0.862837	1.26359	2.52834	1.54117	1.61311	1.56017	1.39611	2.2257	0.550368	1.55103	0.836866	0.902685	0.854543	0.694253	1.3671	0.400753	1.6655	0.678333	0.750273	0.697333	0.533273	1.36286
NM_016904	Cks1b	H3K4me3-only	74.5706	73.9962	123.481	156.037	186.874	206.624	239.468	192.203	-0.0111558	0.72761	1.06521	1.32539	1.47033	1.68315	1.36595	-0.5744	48.9104	81.4664	112.303	132.053	164.897	117.632
NM_028037	Acad10	H3K4me3-only	1.41583	0.964515	0.997137	0.871201	0.887491	0.640697	1.48558	3.629	-0.553772	-0.505784	-0.700571	-0.673844	-1.14393	0.0693782	1.35792	-0.451315	-0.418693	-0.544629	-0.528339	-0.775133	0.06975	2.21317
NM_023627	Isyna1	H3K4me3-only	23.7631	20.2141	19.6197	42.9619	76.9213	94.489	103.389	60.7134	-0.233361	-0.27642	0.854335	1.69466	1.99142	2.12129	1.35329	-3.549	-4.1434	19.1988	53.1582	70.7259	79.6259	36.9503
NM_013614	Odc1	H3K4me3-only	94.4952	108.575	206.666	225.023	326.895	354.436	411.282	240.463	0.200379	1.12899	1.25176	1.79051	1.90721	2.12181	1.3475	14.0798	112.171	130.528	232.4	259.941	316.787	145.968
NM_019771	Dstn	H3K4me3-only	92.2846	130.389	163.528	163.736	206.355	161.896	159.238	234.598	0.49866	0.825376	0.82721	1.16097	0.810906	0.787023	1.34603	38.1044	71.2434	71.4514	114.07	69.6114	66.9534	142.313
NM_172285	Plcg2	H3K4me3-only	15.4952	17.4762	5.93891	3.67929	13.7135	62.9885	64.3693	39.1721	0.17357	-1.38355	-2.07432	-0.176225	2.02327	2.05455	1.33801	1.981	-9.55629	-11.8159	-1.7817	47.4933	48.8741	23.6769
NM_145538	Tmem189	H3K4me3-only	8.92169	7.40248	7.21846	6.91947	11.7791	15.89	21.892	22.5265	-0.269308	-0.305626	-0.366655	0.40084	0.83273	1.29501	1.33623	-1.51921	-1.70323	-2.00222	2.85741	6.96831	12.9703	13.6048
NM_001167763	Ift122	H3K4me3-only	2.50779	1.83931	1.91095	2.17636	1.91502	1.61441	3.10516	6.32863	-0.447252	-0.392127	-0.204499	-0.389057	-0.63541	0.308251	1.33548	-0.66848	-0.59684	-0.33143	-0.59277	-0.89338	0.59737	3.82084
NM_001163527	Itpripl1	H3K4me3-only	1.50371	1.24552	1.56661	2.47568	2.82693	3.26142	4.07032	3.79294	-0.271778	0.0591197	0.719298	0.91071	1.11697	1.43662	1.33479	-0.25819	0.0629	0.97197	1.32322	1.75771	2.56661	2.28923
NM_001198565	Sulf1	H3K4me3-only	5.34727	3.49859	6.72943	12.406	19.179	20.8954	15.7001	13.485	-0.612029	0.331682	1.21416	1.84265	1.96631	1.5539	1.33448	-1.84868	1.38216	7.05873	13.8317	15.5481	10.3528	8.13773
NM_001164564	Egfl7	H3K4me3-only	12.0595	9.99382	7.6962	14.9475	25.2085	22.9068	32.0848	30.2464	-0.271062	-0.647952	0.309734	1.06374	0.925606	1.41172	1.32659	-2.06568	-4.3633	2.888	13.149	10.8473	20.0253	18.1869
NR_029382	Mir17hg	H3K4me3-only	5.82578	12.0245	13.4109	15.4542	16.6308	17.3799	11.0316	14.4726	1.04545	1.20288	1.40748	1.51333	1.5769	0.921119	1.3128	6.19872	7.58512	9.62842	10.805	11.5541	5.20582	8.64682
NM_026856	Zfp644	H3K4me3-only	9.43679	12.0847	11.3762	10.8922	12.5824	19.2613	16.9182	23.3718	0.356814	0.269651	0.206927	0.415039	1.02934	0.842208	1.3084	2.64791	1.93941	1.45541	3.14561	9.82451	7.48141	13.935
NM_153582	Cmtm4	H3K4me3-only	6.3727	4.78784	5.71962	5.97817	6.58075	7.92333	13.6844	15.7284	-0.41253	-0.155985	-0.0922008	0.0463473	0.314202	1.10256	1.3034	-1.58486	-0.65308	-0.39453	0.20805	1.55063	7.3117	9.3557
NM_146251	Pnpla7	H3K4me3-only	1.96513	1.03718	0.948546	1.79501	2.5089	2.512	3.27369	4.84612	-0.921958	-1.05084	-0.130633	0.35243	0.354212	0.736293	1.30221	-0.92795	-1.01658	-0.17012	0.54377	0.54687	1.30856	2.88099
NM_175089	Nek1	H3K4me3-only	3.16581	3.04809	3.44031	3.07105	5.19387	5.01079	6.19824	7.79405	-0.0546692	0.119964	-0.0438427	0.714235	0.662463	0.969284	1.2998	-0.11772	0.2745	-0.09476	2.02806	1.84498	3.03243	4.62824
NM_007930	Enc1	H3K4me3-only	9.77963	20.2898	26.0582	30.1194	35.0602	32.8794	28.3073	23.9896	1.0529	1.41389	1.62284	1.84198	1.74933	1.53332	1.29456	10.5102	16.2786	20.3398	25.2806	23.0998	18.5277	14.21
NM_207221	Jmjd1c	H3K4me3-only	12.0408	13.3212	29.122	25.1877	29.1528	27.4288	26.0878	29.1343	0.145793	1.27418	1.06479	1.2757	1.18776	1.11544	1.27479	1.2804	17.0812	13.1469	17.112	15.388	14.047	17.0935
NM_001040690	Rap1gds1	H3K4me3-only	3.7126	2.4195	1.4647	1.12217	3.76786	3.98119	6.54646	8.98184	-0.617721	-1.34182	-1.72614	0.0213155	0.10077	0.818285	1.27458	-1.2931	-2.2479	-2.59043	0.05526	0.26859	2.83386	5.26924
NM_026526	N6amt2	H3K4me3-only	13.9361	13.5043	20.1842	24.4123	44.6132	54.2253	59.8057	33.5722	-0.045408	0.5344	0.808781	1.67864	1.96014	2.10146	1.26844	-0.4318	6.2481	10.4762	30.6771	40.2892	45.8696	19.6361
NM_028440	Abracl	H3K4me3-only	13.9029	22.7348	18.9609	15.8056	30.2062	24.0956	25.0532	33.4761	0.709516	0.447642	0.18505	1.11946	0.793384	0.849609	1.26775	8.8319	5.058	1.9027	16.3033	10.1927	11.1503	19.5732
NM_001033173	Usp31	H3K4me3-only	2.62358	2.43452	2.74723	2.4	3.79803	4.58595	5.32628	6.29329	-0.107899	0.0664409	-0.128502	0.533715	0.805684	1.02159	1.26228	-0.18906	0.12365	-0.22358	1.17445	1.96237	2.7027	3.66971
NM_001163622	Prepl	H3K4me3-only	6.69163	4.46419	6.54125	7.74468	9.17928	11.145	15.2082	16.0417	-0.583959	-0.0327913	0.210848	0.456023	0.735967	1.18442	1.2614	-2.22744	-0.15038	1.05305	2.48765	4.45337	8.51657	9.35007
NM_175251	Arid2	H3K4me3-only	7.45471	6.04498	7.43962	6.10221	8.06906	13.3719	13.3154	17.8696	-0.302415	-0.0029233	-0.28882	0.114248	0.84298	0.836872	1.26128	-1.40973	-0.01509	-1.3525	0.61435	5.91719	5.86069	10.4149
NM_145919	Abhd14a	H3K4me3-only	8.70678	5.86907	5.57067	10.0017	15.3552	16.0596	24.9087	20.8421	-0.569007	-0.644288	0.200034	0.818516	0.883225	1.51644	1.25929	-2.83771	-3.13611	1.29492	6.64842	7.35282	16.2019	12.1353
NM_178798	Slc7a6	H3K4me3-only	4.39568	4.49895	6.6666	4.89845	5.02838	3.40304	6.26877	10.5022	0.033502	0.600865	0.156239	0.194007	-0.369262	0.512096	1.25653	0.10327	2.27092	0.50277	0.6327	-0.99264	1.87309	6.10652
NM_053090	Fam126a	H3K4me3-only	1.47103	1.64577	3.01663	2.53907	2.297	1.54772	2.86905	3.5093	0.161936	1.03611	0.787474	0.642924	0.0733178	0.963746	1.25436	0.17474	1.5456	1.06804	0.82597	0.07669	1.39802	2.03827
NM_007989	Foxh1	H3K4me3-only	20.1276	12.4562	19.9458	22.4938	31.3186	38.689	55.8596	47.9932	-0.692311	-0.0130902	0.160352	0.637845	0.942748	1.47263	1.25365	-7.6714	-0.1818	2.3662	11.191	18.5614	35.732	27.8656
NM_010158	Khdrbs3	H3K4me3-only	10.4248	11.2007	13.0703	11.0865	13.6371	9.49565	15.4687	24.8129	0.103569	0.326273	0.0887843	0.387517	-0.134681	0.569332	1.25107	0.7759	2.6455	0.6617	3.2123	-0.92915	5.0439	14.3881
NM_019919	Ltbp1	H3K4me3-only	1.23969	0.795191	0.8458	0.594434	0.681983	0.5651	1.51291	2.94913	-0.640606	-0.551591	-1.06039	-0.862172	-1.1334	0.287347	1.25031	-0.444499	-0.39389	-0.645256	-0.557707	-0.67459	0.27322	1.70944
NM_008287	Hrsp12	H3K4me3-only	13.462	15.0313	11.7465	11.3307	16.783	17.0178	30.9053	31.965	0.159077	-0.196662	-0.248656	0.318108	0.338152	1.19896	1.2476	1.5693	-1.7155	-2.1313	3.321	3.5558	17.4433	18.503
NM_001001806	Zfp36l2	H3K4me3-only	3.22093	5.32139	3.80604	4.02147	6.41766	13.5991	11.8168	7.6435	0.724326	0.240813	0.320246	0.99457	2.07796	1.87529	1.24676	2.10046	0.58511	0.80054	3.19673	10.3782	8.59587	4.42257
NM_019651	Ptpn9	H3K4me3-only	2.6058	2.78064	4.59959	2.80544	2.288	2.60153	4.71676	6.17659	0.0936906	0.819779	0.106501	-0.187639	-0.00236601	0.85607	1.24508	0.17484	1.99379	0.19964	-0.3178	-0.00427	2.11096	3.57079
NM_144920	Plekha5	H3K4me3-only	5.41333	4.72484	5.47234	6.33432	7.22067	9.29958	10.1827	12.803	-0.196251	0.0156415	0.226673	0.415616	0.780649	0.911532	1.24189	-0.68849	0.05901	0.92099	1.80734	3.88625	4.76937	7.38967
NM_011565	Tead2	H3K4me3-only	38.8418	29.5166	23.2876	30.6433	43.6136	48.4117	89.7316	91.492	-0.396084	-0.738048	-0.342038	0.167168	0.317746	1.20801	1.23604	-9.3252	-15.5542	-8.1985	4.7718	9.5699	50.8898	52.6502
NM_001164791	B230120H23Rik	H3K4me3-only	3.57741	3.32703	4.46706	3.16424	3.27032	3.42832	4.25427	8.42533	-0.104681	0.32041	-0.177056	-0.129484	-0.0614137	0.249996	1.23582	-0.25038	0.88965	-0.41317	-0.30709	-0.14909	0.67686	4.84792
NM_016905	Galk1	H3K4me3-only	26.5555	20.162	17.7688	25.4396	48.0786	56.7752	88.1852	62.4445	-0.397372	-0.579664	-0.0619347	0.856384	1.09625	1.73153	1.23356	-6.3935	-8.7867	-1.1159	21.5231	30.2197	61.6297	35.889
NM_019571	Tspan5	H3K4me3-only	5.69196	3.1288	4.88808	4.10897	6.65353	9.87239	13.4503	13.3808	-0.863316	-0.219658	-0.470149	0.225194	0.794474	1.24064	1.23317	-2.56316	-0.80388	-1.58299	0.96157	4.18043	7.75834	7.68884
NM_007381	Acadl	H3K4me3-only	4.72724	3.12336	5.11933	3.49234	4.78762	3.60565	4.60302	11.1011	-0.597899	0.114957	-0.436804	0.0183105	-0.390739	-0.0384174	1.23163	-1.60388	0.39209	-1.2349	0.06038	-1.12159	-0.12422	6.37386
NM_019660	Mycbp	H3K4me3-only	6.79078	9.9681	12.8155	13.825	16.072	19.3013	21.8863	15.9055	0.553741	0.916241	1.02563	1.2429	1.50705	1.68838	1.22788	3.17732	6.02472	7.03422	9.28122	12.5105	15.0955	9.11472
NM_145973	Ell3	H3K4me3-only	6.45933	4.21932	2.07982	3.73218	6.71393	5.51866	15.6058	15.1097	-0.614374	-1.63493	-0.791366	0.055773	-0.227067	1.27263	1.22602	-2.24001	-4.37951	-2.72715	0.2546	-0.94067	9.14647	8.65037
NM_175126	Zcchc3	H3K4me3-only	8.09387	9.52217	7.54071	8.71101	14.3576	22.2641	20.9602	18.924	0.234461	-0.102129	0.10601	0.826913	1.45982	1.37275	1.22532	1.4283	-0.55316	0.61714	6.26373	14.1702	12.8663	10.8301
NM_007484	Rhoc	H3K4me3-only	12.5304	9.51038	11.4625	15.2847	21.5611	10.5201	15.5103	29.2481	-0.397858	-0.128511	0.286656	0.782998	-0.252284	0.307794	1.22291	-3.02002	-1.0679	2.7543	9.0307	-2.0103	2.9799	16.7177
NM_016786	Ube2k	H3K4me3-only	11.0164	10.2535	12.3008	12.0709	20.2179	25.6707	27.8359	25.6844	-0.103536	0.159099	0.13188	0.87598	1.22047	1.33729	1.22124	-0.7629	1.2844	1.0545	9.2015	14.6543	16.8195	14.668
NM_133234	Bbc3	H3K4me3-only	5.74108	5.9429	3.17035	5.10192	5.91083	5.28359	8.5061	13.3717	0.0498449	-0.85668	-0.170282	0.0420386	-0.119804	0.567176	1.21979	0.20182	-2.57073	-0.63916	0.16975	-0.45749	2.76502	7.63062
NM_013873	Sult4a1	H3K4me3-only	3.65781	3.01221	4.39745	5.71241	9.61375	7.66005	8.54757	8.50918	-0.280158	0.265687	0.643119	1.39412	1.06637	1.22453	1.21804	-0.6456	0.73964	2.0546	5.95594	4.00224	4.88976	4.85137
NM_001024602	Cep170b	H3K4me3-only	6.51684	3.59754	3.11651	5.24347	6.48772	7.35465	10.6913	15.1511	-0.857162	-1.06424	-0.313651	-0.00646102	0.174484	0.714193	1.21718	-2.9193	-3.40033	-1.27337	-0.02912	0.83781	4.17446	8.63426
NM_178746	Slc38a9	H3K4me3-only	1.06857	0.66221	0.633983	0.697462	0.837181	0.695609	1.6111	2.48033	-0.690321	-0.753165	-0.615495	-0.35207	-0.619333	0.592365	1.21485	-0.40636	-0.434587	-0.371108	-0.231389	-0.372961	0.54253	1.41176
NM_172409	Fmnl2	H3K4me3-only	3.77615	3.98591	2.34326	2.1173	2.95931	3.41714	5.88858	8.75472	0.0779931	-0.688399	-0.83469	-0.351655	-0.144127	0.641004	1.21314	0.20976	-1.43289	-1.65885	-0.81684	-0.35901	2.11243	4.97857
NM_001135577	Smim13	H3K4me3-only	1.93594	1.59722	1.56209	1.16083	1.65807	2.27326	3.63404	4.46887	-0.277471	-0.309557	-0.737878	-0.223529	0.231728	0.90854	1.20688	-0.33872	-0.37385	-0.77511	-0.27787	0.33732	1.6981	2.53293
NM_133948	Psip1	H3K4me3-only	30.8889	32.5339	33.7698	33.1541	48.3717	43.8722	60.1766	71.1174	0.0748553	0.128645	0.102099	0.647075	0.506219	0.962114	1.20311	1.645	2.8809	2.2652	17.4828	12.9833	29.2877	40.2285
NM_026604	Fam135a	H3K4me3-only	2.28944	2.73786	3.67211	2.73739	3.45613	3.76517	4.7177	5.26232	0.258054	0.681615	0.257806	0.594163	0.71772	1.04309	1.2007	0.44842	1.38267	0.44795	1.16669	1.47573	2.42826	2.97288
NM_025281	Lyar	H3K4me3-only	37.2409	40.7004	48.2194	54.6758	75.2338	88.7887	106.133	85.26	0.128155	0.372726	0.554014	1.01449	1.25349	1.51091	1.19498	3.4595	10.9785	17.4349	37.9929	51.5478	68.8921	48.0191
NM_133737	Lancl2	H3K4me3-only	5.88737	6.89894	7.59329	7.29213	10.5964	10.8636	10.3528	13.4333	0.228751	0.367102	0.308717	0.847879	0.883807	0.814326	1.19012	1.01157	1.70592	1.40476	4.70903	4.97623	4.46543	7.54593
NM_001025192	Cxadr	H3K4me3-only	5.80737	8.80076	6.37239	4.75971	4.88314	6.40609	8.04545	13.2451	0.599743	0.13395	-0.287011	-0.250076	0.141559	0.470288	1.1895	2.99339	0.56502	-1.04766	-0.92423	0.59872	2.23808	7.43773
NM_028994	Pck2	H3K4me3-only	22.0111	11.8214	5.59859	4.67113	5.66046	2.53204	34.1435	50.1777	-0.89683	-1.9751	-2.23639	-1.95924	-3.11986	0.63338	1.18882	-10.1897	-16.4125	-17.34	-16.3506	-19.4791	12.1324	28.1666
NM_027257	Nabp2	H3K4me3-only	15.21	11.945	13.7484	20.248	21.4095	26.0465	42.2253	34.6176	-0.348613	-0.145756	0.412759	0.493231	0.776069	1.47309	1.18649	-3.265	-1.4616	5.038	6.1995	10.8365	27.0153	19.4076
NM_029153	Scamp1	H3K4me3-only	4.35446	7.06772	10.3289	7.98951	7.60821	7.09417	7.1394	9.898	0.698751	1.24612	0.875613	0.805063	0.70414	0.713309	1.18464	2.71326	5.97444	3.63505	3.25375	2.73971	2.78494	5.54354
NM_031373	Ogfr	H3K4me3-only	12.8054	11.4782	11.0403	9.87343	10.3398	18.8886	21.6637	29.0895	-0.157856	-0.213973	-0.375129	-0.308544	0.560763	0.758527	1.18375	-1.3272	-1.7651	-2.93197	-2.4656	6.0832	8.8583	16.2841
NM_007672	Cdr2	H3K4me3-only	3.78807	6.52436	6.54543	7.14819	8.84271	9.89799	10.4983	8.59551	0.784373	0.789025	0.916115	1.22303	1.38567	1.47062	1.18212	2.73629	2.75736	3.36012	5.05464	6.10992	6.71023	4.80744
NM_054056	Pawr	H3K4me3-only	18.7125	19.0936	16.8307	15.2793	18.9611	14.2091	26.9584	42.2423	0.0290868	-0.152907	-0.292424	0.0190403	-0.397187	0.526733	1.17469	0.3811	-1.8818	-3.4332	0.2486	-4.5034	8.2459	23.5298
NM_139294	Braf	H3K4me3-only	3.3187	3.47841	6.20112	6.62472	10.2401	14.7221	8.36313	7.4679	0.0678098	0.901911	0.997241	1.62554	2.14929	1.33342	1.17008	0.15971	2.88242	3.30602	6.9214	11.4034	5.04443	4.1492
NM_146261	Fam199x	H3K4me3-only	1.49138	1.37581	1.00173	0.953781	1.15511	1.03078	1.8893	3.34649	-0.116367	-0.574154	-0.644918	-0.368618	-0.532911	0.341204	1.166	-0.11557	-0.48965	-0.537599	-0.33627	-0.4606	0.39792	1.85511
NM_027491	Rragd	H3K4me3-only	20.7973	14.1474	15.1185	9.12057	12.3783	34.1879	33.4679	46.6091	-0.555859	-0.460081	-1.1892	-0.748583	0.71709	0.686382	1.16422	-6.6499	-5.6788	-11.6767	-8.419	13.3906	12.6706	25.8118
NM_011544	Tcf12	H3K4me3-only	4.9687	3.83488	6.72864	6.50118	7.31723	7.7855	9.24207	11.1007	-0.373687	0.437446	0.387833	0.558429	0.647921	0.895348	1.15971	-1.13382	1.75994	1.53248	2.34853	2.8168	4.27337	6.132
NM_173392	Zfyve16	H3K4me3-only	2.08048	1.98565	3.60284	2.48229	2.14124	2.5042	3.06483	4.64232	-0.0673051	0.792218	0.254755	0.0415301	0.267433	0.558891	1.15793	-0.09483	1.52236	0.40181	0.06076	0.42372	0.98435	2.56184
NM_175149	2310022B05Rik	H3K4me3-only	3.09631	2.14773	1.45314	1.5011	2.38175	4.06711	6.1334	6.89402	-0.527737	-1.09138	-1.04453	-0.378528	0.393454	0.986137	1.1548	-0.94858	-1.64317	-1.59521	-0.71456	0.9708	3.03709	3.79771
NM_027338	Vps36	H3K4me3-only	22.2259	21.4834	26.3029	26.9703	36.4883	33.9961	46.2101	49.4732	-0.0490195	0.24298	0.27913	0.715192	0.613127	1.05597	1.15441	-0.7425	4.077	4.7444	14.2624	11.7702	23.9842	27.2473
NM_001002272	Tro	H3K4me3-only	3.18368	4.23516	4.71345	3.84495	4.01851	6.65112	5.84147	7.07748	0.411721	0.566088	0.27227	0.335965	1.0629	0.875636	1.15254	1.05148	1.52977	0.66127	0.83483	3.46744	2.65779	3.8938
NM_007379	Abca2	H3K4me3-only	1.4966	1.17658	0.862545	0.755803	0.794291	0.571635	1.36	3.3246	-0.347089	-0.795017	-0.985607	-0.913949	-1.38852	-0.138082	1.15149	-0.32002	-0.634055	-0.740797	-0.702309	-0.924965	-0.1366	1.828
NM_011276	Rlim	H3K4me3-only	20.8991	36.4628	20.8449	18.2447	29.5937	21.2485	33.0108	46.4019	0.802985	-0.00374636	-0.195963	0.501849	0.0239202	0.659497	1.15074	15.5637	-0.0542	-2.6544	8.6946	0.3494	12.1117	25.5028
NM_170779	Wwc1	H3K4me3-only	5.54469	3.31255	5.01391	5.15399	7.46655	8.41736	10.8539	12.3	-0.743165	-0.145171	-0.105417	0.429335	0.602261	0.969035	1.14948	-2.23214	-0.53078	-0.3907	1.92186	2.87267	5.30921	6.75531
NM_026221	Ppfibp1	H3K4me3-only	6.73487	7.97251	10.5679	9.10405	10.8902	11.978	14.7049	14.9306	0.243384	0.649967	0.434858	0.693308	0.830665	1.12657	1.14855	1.23764	3.83303	2.36918	4.15533	5.24313	7.97003	8.19573
NM_001033352	Klhl21	H3K4me3-only	3.99739	2.18049	2.91244	3.24877	4.078	5.09794	5.91183	8.84944	-0.874406	-0.45683	-0.299165	0.0288034	0.350856	0.564546	1.14653	-1.8169	-1.08495	-0.74862	0.08061	1.10055	1.91444	4.85205
NM_011585	Tia1	H3K4me3-only	4.79057	3.48072	2.91921	5.69036	6.87036	7.32612	8.43181	10.6051	-0.460812	-0.714619	0.248323	0.520188	0.612852	0.815645	1.14649	-1.30985	-1.87136	0.89979	2.07979	2.53555	3.64124	5.81453
NM_199299	Phf15	H3K4me3-only	3.28931	1.34769	3.97662	3.92387	4.30602	11.7206	8.04805	7.28114	-1.2873	0.273758	0.254492	0.38857	1.83319	1.29085	1.14638	-1.94162	0.68731	0.63456	1.01671	8.43129	4.75874	3.99183
NM_008129	Gclm	H3K4me3-only	11.5493	10.5699	10.5889	12.4322	29.8413	42.6227	31.9193	25.5623	-0.127844	-0.125253	0.106276	1.3695	1.88382	1.46662	1.14621	-0.9794	-0.9604	0.8829	18.292	31.0734	20.37	14.013
NM_207215	Mycbp2	H3K4me3-only	4.6254	5.35819	6.42731	5.27055	4.98813	5.85628	6.19315	10.2306	0.212168	0.474637	0.188375	0.108921	0.340406	0.421095	1.14524	0.73279	1.80191	0.64515	0.36273	1.23088	1.56775	5.6052
NM_007905	Phc1	H3K4me3-only	17.0655	4.69164	12.6153	21.1678	27.1271	17.8139	28.9698	37.7335	-1.86292	-0.435908	0.310789	0.668652	0.0619207	0.763467	1.14476	-12.3739	-4.4502	4.1023	10.0616	0.7484	11.9043	20.668
NM_172381	AI314180	H3K4me3-only	8.09963	8.70344	8.90178	7.59023	6.50764	5.98514	10.0138	17.9067	0.10373	0.136238	-0.0937124	-0.315722	-0.436471	0.306062	1.14457	0.60381	0.80215	-0.5094	-1.59199	-2.11449	1.91417	9.80707
NM_025327	Krtcap2	H3K4me3-only	50.4139	44.8728	48.1775	59.0302	60.5798	75.1045	125.605	111.445	-0.16798	-0.065462	0.227632	0.265015	0.575078	1.317	1.14444	-5.5411	-2.2364	8.6163	10.1659	24.6906	75.1911	61.0311
NM_153103	Kif1c	H3K4me3-only	6.28542	4.34823	4.30349	5.43546	5.97699	4.75118	8.37044	13.8932	-0.531581	-0.546502	-0.209607	-0.07259	-0.403723	0.413294	1.1443	-1.93719	-1.98193	-0.84996	-0.30843	-1.53424	2.08502	7.60778
NM_175498	Pnma2	H3K4me3-only	2.52359	0.850051	0.696589	1.13066	1.72296	2.42571	3.8823	5.57197	-1.56986	-1.8571	-1.15831	-0.550588	-0.0570705	0.621434	1.14271	-1.67354	-1.827	-1.39293	-0.80063	-0.09788	1.35871	3.04838
NM_001081116	Arhgef17	H3K4me3-only	2.07155	1.21492	2.32716	2.34621	1.82037	2.20328	2.6751	4.54408	-0.769849	0.16786	0.179622	-0.186479	0.0889422	0.368882	1.13328	-0.85663	0.25561	0.27466	-0.25118	0.13173	0.60355	2.47253
NM_001014974	Ttll4	H3K4me3-only	8.00693	6.97231	12.3268	14.5251	14.6195	18.6238	15.307	17.5525	-0.199612	0.622477	0.859227	0.868573	1.21783	0.93487	1.13236	-1.03462	4.31987	6.51817	6.61257	10.6169	7.30007	9.54557
NM_175677	Trim12c	H3K4me3-only	4.82883	3.97366	5.23997	5.72079	7.7018	7.77881	6.2034	10.5849	-0.281205	0.117885	0.244541	0.673522	0.687876	0.361385	1.13226	-0.85517	0.41114	0.89196	2.87297	2.94998	1.37457	5.75607
NM_001081171	Lama5	H3K4me3-only	14.0996	7.46998	8.45727	10.2537	11.0242	24.4626	25.0773	30.8142	-0.916478	-0.73739	-0.45951	-0.35498	0.794924	0.830728	1.12794	-6.62962	-5.64233	-3.8459	-3.0754	10.363	10.9777	16.7146
NM_023045	Xpo7	H3K4me3-only	5.32639	4.67547	6.74049	6.98006	9.52633	11.3234	10.6683	11.6168	-0.188047	0.339695	0.390081	0.838762	1.08808	1.0021	1.12498	-0.65092	1.4141	1.65367	4.19994	5.99701	5.34191	6.29041
NM_016797	Stx7	H3K4me3-only	6.88995	6.17837	6.46855	4.94586	5.24491	4.29213	8.46297	15.0205	-0.157267	-0.0910512	-0.478272	-0.393575	-0.6828	0.296671	1.12437	-0.71158	-0.4214	-1.94409	-1.64504	-2.59782	1.57302	8.13055
NM_027860	0610010F05Rik	H3K4me3-only	3.59387	4.55813	5.59106	5.0766	5.2935	4.16431	5.08756	7.8072	0.342904	0.637584	0.498324	0.558684	0.212539	0.501436	1.11927	0.96426	1.99719	1.48273	1.69963	0.57044	1.49369	4.21333
NM_172993	Zfp512	H3K4me3-only	11.6351	7.49831	7.73512	10.4662	14.9866	17.0992	24.1962	25.1644	-0.633846	-0.588988	-0.152746	0.36519	0.555445	1.0563	1.1129	-4.13679	-3.89998	-1.1689	3.3515	5.4641	12.5611	13.5293
NM_175400	Sephs1	H3K4me3-only	11.8632	9.92847	14.8742	15.5719	20.502	34.2476	32.685	25.6504	-0.25685	0.326319	0.392452	0.789271	1.52951	1.46214	1.11249	-1.93473	3.011	3.7087	8.6388	22.3844	20.8218	13.7872
NM_010578	Itgb1	H3K4me3-only	25.7533	29.8273	49.5655	29.7999	31.5618	30.3654	33.1089	55.5498	0.211876	0.944579	0.21055	0.293422	0.237671	0.362462	1.10902	4.074	23.8122	4.0466	5.8085	4.6121	7.3556	29.7965
NM_010585	Itpr1	H3K4me3-only	6.08425	6.07663	8.21309	7.95654	7.1785	6.59527	9.14717	13.0878	-0.00180798	0.432846	0.387062	0.238603	0.116352	0.588246	1.10507	-0.00762	2.12884	1.87229	1.09425	0.51102	3.06292	7.00355
NM_011438	Sox12	H3K4me3-only	4.24155	1.54868	2.09885	4.2798	6.08215	7.96023	9.24719	9.12244	-1.45355	-1.01499	0.0129518	0.51999	0.908219	1.12442	1.10483	-2.69287	-2.1427	0.03825	1.8406	3.71868	5.00564	4.88089
NM_024479	Wbscr27	H3K4me3-only	4.94601	3.00653	4.07292	4.38506	5.79276	3.38772	4.24045	10.6121	-0.718166	-0.280202	-0.173669	0.227986	-0.545951	-0.222048	1.10137	-1.93948	-0.87309	-0.56095	0.84675	-1.55829	-0.70556	5.66609
NM_057172	Fubp1	H3K4me3-only	20.8398	23.1371	35.611	33.5443	32.5722	49.4141	40.896	44.6518	0.150867	0.772982	0.686726	0.6443	1.24558	0.972618	1.09938	2.2973	14.7712	12.7045	11.7324	28.5743	20.0562	23.812
NM_133816	Sh3bp4	H3K4me3-only	6.79853	4.73949	7.59372	7.96686	9.34332	8.1908	7.56922	14.5618	-0.520491	0.159584	0.228788	0.458712	0.268782	0.154922	1.09889	-2.05904	0.79519	1.16833	2.54479	1.39227	0.77069	7.76327
NM_010568	Insr	H3K4me3-only	2.1271	1.49805	1.3762	1.05368	1.32304	1.2316	1.93094	4.54318	-0.505802	-0.628198	-1.01345	-0.685031	-0.788354	-0.139585	1.09481	-0.62905	-0.7509	-1.07342	-0.80406	-0.8955	-0.19616	2.41608
NM_207176	Tes	H3K4me3-only	5.27336	8.64892	12.5763	7.27108	4.23536	3.28411	4.83393	11.2377	0.713798	1.25391	0.463447	-0.316238	-0.68322	-0.125526	1.09155	3.37556	7.30294	1.99772	-1.038	-1.98925	-0.43943	5.96434
NM_001081188	Exosc7	H3K4me3-only	28.8005	23.7005	30.6538	31.322	44.8321	51.2527	72.1836	61.3179	-0.281176	0.0899721	0.121082	0.638438	0.831534	1.32558	1.09021	-5.1	1.8533	2.5215	16.0316	22.4522	43.3831	32.5174
NM_001081426	Dip2c	H3K4me3-only	3.68191	3.16294	3.8141	3.68812	5.20743	5.69985	7.62538	7.81489	-0.219188	0.0508883	0.00243124	0.500117	0.63047	1.05035	1.08577	-0.51897	0.13219	0.00621	1.52552	2.01794	3.94347	4.13298
NM_134080	Flnb	H3K4me3-only	24.4336	24.8395	24.174	19.676	17.9335	12.2639	13.7256	51.666	0.0237697	-0.0154102	-0.312429	-0.446209	-0.994449	-0.831997	1.08035	0.4059	-0.2596	-4.7576	-6.5001	-12.1697	-10.708	27.2324
NM_001277149	Chd7	H3K4me3-only	3.17037	2.9777	4.44398	4.36559	5.06967	5.21482	4.75847	6.69788	-0.0904528	0.487201	0.461525	0.677241	0.717966	0.585847	1.07905	-0.19267	1.27361	1.19522	1.8993	2.04445	1.5881	3.52751
NM_001098222	Bhlhb9	H3K4me3-only	6.62398	8.33902	13.3126	10.4646	9.1243	10.877	10.3876	13.8667	0.33218	1.00702	0.659747	0.462016	0.71551	0.649092	1.06585	1.71504	6.68862	3.84062	2.50032	4.25302	3.76362	7.24272
NM_001039214	Mex3c	H3K4me3-only	10.49	15.8098	13.8461	11.7976	14.4854	15.8215	18.0377	21.7767	0.591804	0.400465	0.169479	0.465585	0.592872	0.782001	1.05377	5.3198	3.3561	1.3076	3.9954	5.3315	7.5477	11.2867
NM_172644	Dars2	H3K4me3-only	9.99178	8.1015	10.5437	9.20651	12.1183	13.8097	18.0571	20.5955	-0.302553	0.0775676	-0.118087	0.278374	0.466868	0.853753	1.04352	-1.89028	0.55192	-0.78527	2.12652	3.81792	8.06532	10.6037
NM_134138	Psmg2	H3K4me3-only	23.6826	22.7297	27.8119	29.5043	40.3357	39.9018	45.8681	48.6784	-0.0592488	0.231875	0.317098	0.76823	0.752626	0.953664	1.03945	-0.9529	4.1293	5.8217	16.6531	16.2192	22.1855	24.9958
NM_001038637	Gng2	H3K4me3-only	7.6748	3.14551	2.37119	6.43093	9.36293	7.65309	11.9942	15.7585	-1.28684	-1.69452	-0.255102	0.286831	-0.00408679	0.644136	1.03793	-4.52929	-5.30361	-1.24387	1.68813	-0.02171	4.3194	8.0837
NM_009609	Actg1	H3K4me3-only	205.197	290.58	222.751	170.901	280.178	224.373	218.424	420.994	0.501926	0.118422	-0.263849	0.449334	0.128889	0.0901217	1.03679	85.383	17.554	-34.296	74.981	19.176	13.227	215.797
[truncated: 198 more rows]

## Sheet: Upreg. Biv Genes H3K4me3 sorted
Supplemental Table 3C. Bivalent genes upregulated during ESC to EpiLC differentiation sorted based on their promoter H3K4me3 levels in ESCs
[truncated: 319 more rows]
