# Supplementary material for: Decoding the function of bivalent chromatin in development and cancer
Source: HighWire-hosted journal article supplement (doi:10.1101/gr.275736.121), 2021-10-19
Supplement: Supplemental_Table_S4.xlsx [file Supplemental_Table_S4.xlsx]

## Sheet: Bivalency & Poised RNA Pol II
Supplemental Table 4. Bivalent genes in ESCs that harbor poised RNAPII
RefSeq Accession	Gene Symbol	Gene Coordinates (mm9)				ChIP-Seq Signal at the Promoter (RPM)							Gene Expression (RPKM)	Chromatin & RNAPII Status
		Chr	Start	End	Strand	H3K4me3	H3K27me3	RNAPII-S2p	RNAPII-S5p	RNAPII-S7p	Erk2	TFIIH/ERCC3
NM_008859	Prkcq	chr2	11094008	11222853	+	29.2968	115.75	15.9642	52.9546	18.6047	21.3517	13.6391	0	Bivalent with poised RNAPII
NM_009633	Adra2b	chr2	127189021	127192957	+	68.3591	178.219	17.1468	70.4441	18.2003	57.1675	22.9385	0.77462	Bivalent with poised RNAPII
NM_026516	Tmem178	chr17	81343971	81401156	+	41.3601	173.626	13.0079	60.7277	14.9647	56.4788	27.2782	0.138298	Bivalent with poised RNAPII
NM_175386	Lhfp	chr3	52845468	53065601	+	68.3591	169.492	15.373	27.206	13.7513	26.8619	24.7984	0.613158	Bivalent with poised RNAPII
NM_027756	Mfap3l	chr8	63111656	63155528	+	109.719	140.554	24.242	35.465	25.076	33.0607	17.9788	1.46224e-05	Bivalent with poised RNAPII
NM_153546	Mboat1	chr13	30228358	30338563	+	55.1469	173.166	13.0079	20.4045	10.9202	17.2191	24.1784	0.339331	Bivalent with poised RNAPII
NM_010474	Hs3st1	chr5	40005173	40035870	-	99.3792	167.654	20.6944	46.1531	13.3469	22.0405	18.5988	2.67503	Bivalent with poised RNAPII
NM_028416	Kremen2	chr17	23878165	23882796	-	26.999	149.741	13.5992	32.5501	17.3914	28.9282	17.9788	0.604192	Bivalent with poised RNAPII
NM_020610	Nrip3	chr7	116901569	116925059	-	62.0402	207.157	26.6071	47.1247	27.5027	20.663	25.4183	1.26934	Bivalent with poised RNAPII
NM_001034902	Gm5878	chr6	85061409	85076088	-	55.1469	132.286	19.5119	36.9224	21.8403	20.663	22.3185	0.0279127	Bivalent with poised RNAPII
NM_008242	Foxd1	chr13	99124199	99126660	+	41.9346	244.362	19.5119	188.013	14.1558	129.488	19.2187	0.0548762	Bivalent with poised RNAPII
NM_010572	Irs4	chrX	138145540	138159760	-	59.168	87.2722	19.5119	25.7485	8.49347	15.8416	22.3185	0.123016	Bivalent with poised RNAPII
NM_177906	Opcml	chr9	27598853	28732633	+	32.7434	170.41	9.4603	17.0038	8.49347	14.4641	17.9788	0	Bivalent with poised RNAPII
NM_009047	Rem1	chr2	152452743	152460927	+	43.6579	152.037	13.5992	46.6389	14.5602	17.9079	21.0786	0.058992	Bivalent with poised RNAPII
NM_011353	Serf1	chr13	100877973	100884188	+	40.2113	140.554	18.9206	47.6105	16.178	18.5967	18.5988	2.88406	Bivalent with poised RNAPII
NM_022315	Smoc2	chr17	14416512	14541797	+	21.829	266.41	14.7817	89.877	12.1335	23.418	24.1784	0.0157115	Bivalent with poised RNAPII
NM_016853	Stac	chr9	111463937	111592720	-	25.8501	144.688	8.86903	23.8053	12.9424	15.8416	19.8387	0	Bivalent with poised RNAPII
NM_172910	Dlgap2	chr8	14095874	14847686	+	36.7646	255.386	18.9206	143.317	14.5602	35.127	29.1381	1.92706e-05	Bivalent with poised RNAPII
NM_011144	Ppara	chr15	85566205	85637281	+	87.3159	165.358	21.2857	93.7636	15.7736	14.4641	19.2187	5.53515e-06	Bivalent with poised RNAPII
NM_020596	Egr4	chr6	85461115	85463536	-	40.2113	197.051	14.7817	107.367	17.7958	61.9889	27.8982	0	Bivalent with poised RNAPII
NM_144879	Vash2	chr1	192771524	192802877	-	43.0835	180.516	22.4682	69.9583	14.5602	26.8619	23.5584	9.43401e-06	Bivalent with poised RNAPII
NM_023908	Slco3a1	chr7	81426801	81699666	-	79.2736	151.119	12.4166	75.3024	14.5602	28.2394	24.7984	0.176168	Bivalent with poised RNAPII
NM_001025372	Adcyap1r1	chr6	55401973	55451449	+	66.0613	154.334	14.7817	39.3516	9.30237	13.7753	16.7389	9.21667e-06	Bivalent with poised RNAPII
NM_010600	Kcnh1	chr1	194014753	194334040	+	59.168	130.908	23.6507	20.8903	21.8403	11.709	13.6391	4.76254e-05	Bivalent with poised RNAPII
NM_011935	Esrrg	chr1	189821705	190038763	+	16.0845	76.2483	14.1904	18.4612	6.47121	11.709	15.499	0.0242927	Bivalent with poised RNAPII
NM_033149	B3galt5	chr16	96502638	96541465	+	33.3179	144.688	14.7817	21.3762	17.7958	23.418	35.9576	0.0175366	Bivalent with poised RNAPII
NM_145356	Zbtb7c	chr18	75979831	76308218	+	147.633	169.032	18.3293	61.2135	18.6047	53.7237	19.8387	0.312029	Bivalent with poised RNAPII
NM_026418	Rgs10	chr7	135517138	135561686	-	73.5291	229.664	16.5555	34.0075	16.9869	22.7293	27.2782	1.28964	Bivalent with poised RNAPII
NM_178928	Afap1l1	chr18	61889915	61946316	-	35.0412	131.827	17.1468	50.0396	15.3691	22.7293	16.1189	1.16178	Bivalent with poised RNAPII
NM_001029985	Kcp	chr6	29432035	29457952	-	43.6579	152.497	24.242	76.7598	23.0537	21.3517	24.1784	0.520248	Bivalent with poised RNAPII
NM_001033324	Zbtb16	chr9	48462401	48644050	-	55.7213	214.506	12.4166	101.051	13.7513	53.035	25.4183	0	Bivalent with poised RNAPII
NM_172685	Slc25a24	chr3	108926066	108971327	+	40.2113	89.5688	28.3809	21.3762	18.2003	11.709	14.2591	0.961251	Bivalent with poised RNAPII
NM_008593	Foxd2	chr4	114578884	114581503	-	41.3601	164.439	7.09522	101.051	11.7291	288.593	26.0383	0	Bivalent with poised RNAPII
NM_010712	Lhx4	chr1	157548823	157589157	-	49.4024	257.683	10.6428	246.312	11.7291	401.55	20.4586	0.0501189	Bivalent with poised RNAPII
NM_027402	Fndc5	chr4	128814303	128821837	+	44.2324	177.3	17.1468	92.7919	17.7958	24.7956	11.1593	0.148757	Bivalent with poised RNAPII
NM_177320	Pik3r5	chr11	68245626	68311348	+	47.6791	161.224	15.9642	47.1247	19.4136	25.4843	27.8982	0.0695125	Bivalent with poised RNAPII
NM_016968	Olig1	chr16	91270013	91272184	+	291.244	96.9181	17.1468	163.722	12.1335	87.4732	34.7177	4.28123	Bivalent with poised RNAPII
NM_009255	Serpine2	chr1	79790895	79855240	-	48.2535	159.387	25.4245	64.1285	16.178	18.5967	19.8387	6.7793	Bivalent with poised RNAPII
NM_001081231	Lhfpl3	chr5	22252010	22781415	+	25.2756	211.291	12.4166	48.5822	12.538	22.0405	19.8387	5.36145e-05	Bivalent with poised RNAPII
NM_010051	Dkk1	chr19	30620373	30623986	-	36.1901	203.023	17.7381	71.9016	15.3691	35.8158	26.6582	1.31987	Bivalent with poised RNAPII
NM_016667	Sntb1	chr15	55470708	55738504	-	89.0392	163.061	10.6428	87.4479	9.30237	31.6832	22.3185	0.211801	Bivalent with poised RNAPII
NM_011880	Rgs7	chr1	176989206	177422676	-	47.1046	140.095	9.4603	21.3762	8.08902	14.4641	16.1189	0.112322	Bivalent with poised RNAPII
NM_175459	Glis3	chr19	28336937	28754567	-	59.168	147.444	22.4682	100.079	16.178	77.1417	21.6986	0.0667356	Bivalent with poised RNAPII
NM_001037099	Cacnb4	chr2	52283839	52532101	-	32.7434	194.755	10.6428	68.9867	16.9869	30.9945	21.6986	0	Bivalent with poised RNAPII
NM_177271	Samd5	chr10	9347056	9395006	-	58.5935	214.506	15.9642	79.6748	17.7958	26.8619	22.3185	0.0540625	Bivalent with poised RNAPII
NM_011402	Slc34a2	chr5	53440591	53462902	+	47.6791	176.382	15.9642	21.862	12.9424	20.663	16.7389	0.447325	Bivalent with poised RNAPII
NM_029070	Cldn26	chr16	8409368	8425229	-	31.0201	165.358	14.7817	68.015	14.9647	32.372	24.1784	0.0343229	Bivalent with poised RNAPII
NM_015736	Galnt3	chr2	65920822	65962850	-	124.08	143.31	12.4166	67.5292	16.5825	18.5967	24.1784	1.48336	Bivalent with poised RNAPII
NM_027917	Shroom1	chr11	53270706	53281257	+	39.6368	154.793	18.3293	23.3194	22.6493	15.8416	27.2782	3.6443e-06	Bivalent with poised RNAPII
NM_011844	Mgll	chr6	88674405	88778354	+	70.6569	166.736	18.3293	45.1814	14.5602	33.0607	23.5584	0.473241	Bivalent with poised RNAPII
NM_008852	Pitx3	chr19	46210175	46222815	-	94.2092	270.084	14.7817	54.8978	23.4582	19.9742	25.4183	0.0351402	Bivalent with poised RNAPII
NM_145711	Tox	chr4	6614532	6917870	-	55.1469	150.2	8.86903	37.8941	9.70682	17.9079	27.2782	0.0155929	Bivalent with poised RNAPII
NM_009612	Acvrl1	chr15	100958952	100975767	+	37.9135	136.88	26.0158	37.8941	25.8849	17.2191	23.5584	0	Bivalent with poised RNAPII
NM_172298	Tshz3	chr7	37483136	37558476	+	182.1	105.186	17.7381	84.533	14.5602	84.0294	19.8387	0.232425	Bivalent with poised RNAPII
NM_019483	Smad9	chr3	54559503	54605191	+	29.8712	173.166	11.2341	27.6918	10.9202	15.1528	21.6986	0.0159598	Bivalent with poised RNAPII
NM_170597	Creg2	chr1	39675250	39708027	-	35.6157	117.128	19.5119	43.7239	12.9424	17.9079	21.6986	0.0516774	Bivalent with poised RNAPII
NM_010703	Lef1	chr3	130813214	130927275	+	68.3591	219.558	15.373	171.981	16.178	94.3609	31.6179	9.50288e-06	Bivalent with poised RNAPII
NM_016972	Slc7a8	chr14	55341051	55400723	-	38.4879	191.54	11.2341	20.4045	8.89792	34.4383	24.1784	0.280358	Bivalent with poised RNAPII
NM_020557	Cmpk2	chr12	27154079	27164702	+	65.4869	58.7939	5.91268	33.5217	10.1113	13.0865	19.2187	0.0138336	Bivalent with poised RNAPII
NM_025829	Eif4e3	chr6	99575130	99616765	-	39.6368	128.612	19.5119	29.6351	10.5157	20.663	27.2782	0.357609	Bivalent with poised RNAPII
NM_008003	Fgf15	chr7	152082436	152086856	+	63.1891	196.133	18.3293	95.221	21.8403	30.3057	22.3185	0.437691	Bivalent with poised RNAPII
NM_019923	Itpr2	chr6	146056820	146450745	-	83.2947	181.434	10.6428	41.7807	10.9202	26.8619	22.9385	5.3193e-05	Bivalent with poised RNAPII
NM_001033254	Pak6	chr2	118489312	118523756	+	36.7646	97.3774	16.5555	32.0642	18.6047	17.2191	35.9576	0.17452	Bivalent with poised RNAPII
NM_172553	Alx1	chr10	102470480	102491411	-	38.4879	203.482	10.0516	97.6502	10.9202	33.7495	17.9788	0.0360731	Bivalent with poised RNAPII
NM_028075	Tnfrsf13c	chr15	82052173	82054766	-	25.2756	90.9468	12.4166	41.2948	17.3914	27.5506	29.758	0.679015	Bivalent with poised RNAPII
NM_010043	Des	chr1	75356918	75364290	+	44.2324	109.32	15.373	43.2381	19.4136	30.3057	21.6986	1.24122	Bivalent with poised RNAPII
NM_027878	Dram1	chr10	87785548	87819820	-	43.6579	137.339	24.242	50.5255	16.178	24.1068	25.4183	1.99865	Bivalent with poised RNAPII
NM_001033877	Adamts17	chr7	73984620	74297511	+	78.1247	118.506	23.6507	54.8978	15.3691	26.8619	24.7984	0.127639	Bivalent with poised RNAPII
NM_172822	Pigz	chr16	31933936	31946132	+	50.5513	208.994	23.6507	107.852	26.6938	20.663	28.5181	0.0625463	Bivalent with poised RNAPII
NM_007664	Cdh2	chr18	16747385	16967558	-	51.7002	153.875	15.373	45.1814	16.9869	48.9024	16.7389	0.0929796	Bivalent with poised RNAPII
NM_146037	Kcnk13	chr12	101202708	101300892	+	31.0201	195.673	25.4245	139.431	25.4804	27.5506	26.0383	0.0860479	Bivalent with poised RNAPII
NM_173781	Rab6b	chr9	103014403	103087600	+	79.8481	192.458	23.0595	63.6426	20.627	31.6832	19.2187	0.446753	Bivalent with poised RNAPII
NM_010704	Lepr	chr4	101390011	101464863	+	49.4024	180.975	19.5119	38.3799	14.5602	21.3517	26.0383	0	Bivalent with poised RNAPII
NM_001081270	Dscaml1	chr9	45238375	45561796	+	139.016	155.253	36.0674	97.6502	18.2003	19.9742	19.2187	0.166935	Bivalent with poised RNAPII
NM_008046	Fst	chr13	115242469	115248938	-	75.8269	203.023	17.7381	105.909	16.178	124.667	32.8578	0.451074	Bivalent with poised RNAPII
NM_001033286	Slc30a10	chr1	187278726	187292640	+	51.1257	155.712	14.1904	36.9224	12.1335	23.418	15.499	0.0660177	Bivalent with poised RNAPII
NM_018884	Pdzrn3	chr6	101099600	101327891	-	43.0835	100.593	13.5992	66.5576	9.70682	17.2191	19.2187	0.127009	Bivalent with poised RNAPII
NM_016705	Kif21a	chr15	90763706	90880379	-	91.337	77.167	14.1904	40.809	8.08902	15.1528	18.5988	0.894017	Bivalent with poised RNAPII
NM_172510	Mfsd4	chr1	133923197	133964639	-	36.7646	242.066	17.1468	41.7807	12.1335	33.7495	28.5181	0.25196	Bivalent with poised RNAPII
NM_001077514	Slc1a2	chr2	102498839	102630941	+	44.2324	164.899	14.7817	33.0359	16.178	24.7956	27.8982	1.47843e-06	Bivalent with poised RNAPII
NM_011380	Six2	chr17	86083607	86087594	-	33.3179	233.798	15.373	218.134	10.9202	617.134	25.4183	0.0216802	Bivalent with poised RNAPII
NM_033269	Chrm3	chr13	9875858	10360049	-	50.5513	199.807	8.27776	42.7523	5.66231	17.2191	18.5988	0.0139316	Bivalent with poised RNAPII
NM_026778	Cthrc1	chr15	38908477	38918665	+	78.6992	97.8367	19.5119	21.862	13.3469	23.418	12.3992	3.90925	Bivalent with poised RNAPII
NM_175172	4930506M07Rik	chr19	59047847	59150559	-	49.4024	158.468	18.9206	94.7352	14.5602	21.3517	17.9788	1.13116	Bivalent with poised RNAPII
NM_009504	Vdr	chr15	97684857	97738727	-	35.6157	132.286	12.4166	46.6389	15.3691	26.1731	22.3185	0.218942	Bivalent with poised RNAPII
NM_009928	Col15a1	chr4	47220883	47326037	+	28.1479	179.597	11.2341	57.8128	10.9202	22.7293	13.0191	0.0242251	Bivalent with poised RNAPII
NM_015768	Prok2	chr6	99661292	99676386	-	41.9346	193.836	19.5119	56.8411	15.7736	24.1068	23.5584	1.39092e-05	Bivalent with poised RNAPII
NM_010109	Efna5	chr17	62952305	63230666	-	126.378	110.698	11.2341	168.58	14.5602	102.626	32.2379	0.589539	Bivalent with poised RNAPII
NM_007439	Alk	chr17	72218327	72953647	-	59.168	131.827	18.3293	31.0926	14.9647	24.7956	22.3185	0.0216864	Bivalent with poised RNAPII
NM_011019	Osmr	chr15	6763576	6824313	-	38.4879	109.32	15.9642	61.6994	12.538	20.663	14.879	0.205129	Bivalent with poised RNAPII
NM_011415	Snai2	chr16	14705951	14709475	+	91.337	154.793	17.1468	51.9829	20.2225	22.7293	27.2782	0.137057	Bivalent with poised RNAPII
NM_175455	Ankrd34b	chr13	93195923	93211613	+	93.6348	150.659	11.2341	92.7919	11.3246	19.2854	14.879	0.121596	Bivalent with poised RNAPII
NM_133738	Antxr2	chr5	98313706	98459981	-	38.4879	135.502	16.5555	40.3232	10.9202	33.0607	19.2187	0.0698572	Bivalent with poised RNAPII
NM_027533	Tspan2	chr3	102538692	102576233	+	92.4859	163.061	20.1031	74.8165	17.3914	20.663	25.4183	0	Bivalent with poised RNAPII
NM_011569	Tekt1	chr11	72158221	72175382	-	20.6801	53.7413	13.0079	45.1814	21.8403	14.4641	19.8387	0.00610907	Bivalent with poised RNAPII
NM_009367	Tgfb2	chr1	188447064	188529871	-	43.6579	127.693	28.3809	86.9621	30.3338	26.8619	17.9788	0.365422	Bivalent with poised RNAPII
NM_007625	Cbx4	chr11	118938884	118947551	-	40.7857	209.453	18.3293	164.208	13.7513	802.412	26.6582	0.140628	Bivalent with poised RNAPII
NM_153778	Atoh8	chr6	72156171	72185571	-	32.169	163.521	14.7817	119.026	17.3914	50.2799	19.8387	0	Bivalent with poised RNAPII
NM_018780	Sfrp5	chr19	42272460	42276742	-	52.2746	196.592	21.8769	78.7031	21.8403	21.3517	26.0383	0.146017	Bivalent with poised RNAPII
NM_011771	Ikzf3	chr11	98326006	98407345	-	47.1046	319.233	18.3293	48.5822	14.9647	30.3057	19.2187	0.25454	Bivalent with poised RNAPII
NM_001037914	Mcidas	chr13	113784075	113790602	+	43.6579	215.884	13.0079	66.5576	8.89792	42.0147	21.6986	0	Bivalent with poised RNAPII
NM_016864	Atoh7	chr10	62562903	62563353	+	63.1891	166.736	22.4682	31.5784	18.6047	22.7293	23.5584	0	Bivalent with poised RNAPII
NM_001036684	Atp2b2	chr6	113695661	113841370	-	58.0191	97.3774	21.8769	41.2948	21.0314	17.9079	21.0786	0.117114	Bivalent with poised RNAPII
NM_153790	Scarf2	chr16	17797374	17808380	+	50.5513	238.85	27.7896	114.168	19.8181	35.127	27.2782	0.693124	Bivalent with poised RNAPII
NM_198711	Col25a1	chr3	129883762	130302801	+	38.4879	129.071	17.1468	34.4933	22.6493	26.8619	19.8387	0.0189213	Bivalent with poised RNAPII
NM_011773	Slc30a3	chr5	31388478	31395900	-	68.9336	226.448	23.6507	168.094	16.5825	32.372	27.8982	0.712067	Bivalent with poised RNAPII
NM_031397	Bicc1	chr10	70387847	70622382	-	83.8692	211.75	18.3293	52.9546	10.5157	21.3517	17.3589	0.0285465	Bivalent with poised RNAPII
NM_001024474	Diras2	chr13	52599743	52626205	-	62.0402	97.3774	22.4682	55.8695	20.627	19.2854	25.4183	0.0797303	Bivalent with poised RNAPII
NM_178638	Tmem108	chr9	103385265	103664167	-	60.3169	195.214	23.6507	58.2986	14.5602	19.2854	22.9385	0.106557	Bivalent with poised RNAPII
NM_173770	Fam69c	chr18	84889633	84909828	+	95.3581	151.578	20.1031	72.8732	19.8181	23.418	22.9385	0	Bivalent with poised RNAPII
NM_178692	C130074G19Rik	chr1	186695804	186706915	-	56.8702	144.688	19.5119	34.9792	14.1558	41.3259	26.6582	0.826114	Bivalent with poised RNAPII
NM_176959	Fbxl7	chr15	26470213	26825319	-	112.017	141.013	20.1031	15.5463	15.3691	17.2191	22.3185	0.0561669	Bivalent with poised RNAPII
NM_010212	Fhl2	chr1	43179918	43220806	-	35.6157	144.229	11.8254	45.1814	12.1335	25.4843	15.499	0	Bivalent with poised RNAPII
NM_001048227	Dbndd2	chr2	164311639	164318823	+	75.8269	143.769	25.4245	50.5255	21.0314	18.5967	18.5988	0.440505	Bivalent with poised RNAPII
NM_177740	Rgma	chr7	80520405	80564785	+	52.8491	214.047	20.6944	76.274	26.6938	48.2136	22.9385	0.146527	Bivalent with poised RNAPII
NM_008939	Prss12	chr3	123149830	123209520	+	44.2324	156.171	5.32142	69.9583	8.89792	17.2191	20.4586	0.206178	Bivalent with poised RNAPII
NM_011595	Timp3	chr10	85763156	85812250	+	76.4014	96.4587	23.0595	51.9829	29.5249	17.2191	22.3185	1.41147	Bivalent with poised RNAPII
NM_007416	Adra1b	chr11	43588107	43649834	-	35.6157	161.683	11.2341	49.5538	10.9202	30.9945	18.5988	0	Bivalent with poised RNAPII
NM_022814	Svep1	chr4	58055667	58219468	-	42.509	160.305	16.5555	51.0113	9.70682	22.0405	12.3992	0	Bivalent with poised RNAPII
NM_133974	Cdcp1	chr9	123081402	123125156	-	93.0603	75.3297	20.6944	32.0642	12.538	20.663	29.758	0.97438	Bivalent with poised RNAPII
NM_007904	Ednrb	chr14	104213831	104242918	-	38.4879	186.946	21.8769	61.6994	25.8849	28.2394	17.9788	0.0339735	Bivalent with poised RNAPII
NM_019417	Pdlim4	chr11	53868429	53882519	-	40.7857	144.229	21.8769	19.9187	12.538	19.9742	24.1784	5.29715	Bivalent with poised RNAPII
NM_009527	Wnt7a	chr6	91313976	91361363	-	46.5302	166.276	18.3293	77.2456	15.7736	26.1731	22.9385	0.250093	Bivalent with poised RNAPII
NM_021543	Pcdh8	chr14	80166578	80171119	-	28.1479	248.496	10.0516	76.274	13.3469	33.7495	29.1381	1.82892e-06	Bivalent with poised RNAPII
NM_001037907	Ripply2	chr9	86910371	86914751	+	43.0835	177.3	7.09522	46.6389	11.3246	22.0405	26.0383	0	Bivalent with poised RNAPII
NM_029361	Wnk2	chr13	49131670	49243383	-	95.3581	151.578	23.0595	85.9904	16.5825	37.8821	24.1784	0.0516309	Bivalent with poised RNAPII
NM_001038643	Slco3a1	chr7	81420303	81699666	-	79.2736	151.119	12.4166	75.3024	14.5602	28.2394	24.7984	0.230895	Bivalent with poised RNAPII
NM_172787	L3mbtl3	chr10	25995257	26094991	-	124.08	102.43	14.1904	46.1531	8.89792	33.7495	17.3589	0.309037	Bivalent with poised RNAPII
NM_177231	Arrb1	chr7	106683995	106755281	+	52.2746	103.349	17.1468	150.605	13.3469	14.4641	14.2591	0.000542058	Bivalent with poised RNAPII
NM_133829	Mfsd6	chr1	52713147	52784162	-	89.6136	148.822	15.9642	17.4896	16.178	22.0405	22.3185	0.40705	Bivalent with poised RNAPII
NM_007400	Adam12	chr7	141074882	141416780	-	49.4024	165.358	13.5992	56.3553	16.178	20.663	17.9788	0.0276495	Bivalent with poised RNAPII
NM_008398	Itga7	chr10	128370868	128395340	+	58.5935	188.784	26.0158	26.2344	20.627	19.9742	22.3185	1.26624	Bivalent with poised RNAPII
NM_177265	Ifitm10	chr7	149512014	149558164	-	40.2113	97.8367	30.746	60.2419	30.7383	14.4641	13.6391	0.0409388	Bivalent with poised RNAPII
NM_010586	Itpr2	chr6	146056820	146450745	-	83.2947	181.434	10.6428	41.7807	10.9202	26.8619	22.9385	0.20794	Bivalent with poised RNAPII
NM_030209	Crispld2	chr8	122516369	122576693	+	32.7434	166.276	20.6944	24.2911	14.9647	15.8416	30.9979	0.146526	Bivalent with poised RNAPII
NM_016889	Insm1	chr2	146047732	146050754	+	45.9557	171.788	13.5992	158.378	18.2003	43.3922	40.9173	0.175835	Bivalent with poised RNAPII
NM_001081141	Gabbr2	chr4	46676769	47004586	-	26.999	175.922	15.373	82.1039	19.0092	64.744	13.0191	0.0108853	Bivalent with poised RNAPII
NM_177350	Gldn	chr9	54134292	54189584	+	31.0201	129.071	9.4603	29.1493	9.30237	16.5304	17.3589	0	Bivalent with poised RNAPII
NM_177059	Fstl4	chr11	52578207	53000849	+	68.3591	246.199	17.7381	89.877	14.9647	32.372	24.7984	0	Bivalent with poised RNAPII
NM_027504	Prdm16	chr4	153690233	154010982	-	83.8692	144.688	14.7817	183.155	17.3914	304.434	21.6986	0	Bivalent with poised RNAPII
NM_001081263	Slc44a5	chr3	153636399	153934684	+	32.169	139.176	15.373	49.068	18.2003	24.7956	18.5988	0.0318339	Bivalent with poised RNAPII
NM_009528	Wnt7b	chr15	85365866	85412251	-	66.6358	177.76	19.5119	125.342	20.627	46.8361	17.9788	1.2379	Bivalent with poised RNAPII
NM_010248	Gab2	chr7	104230260	104457461	+	86.167	149.741	20.6944	55.3837	25.4804	28.9282	20.4586	0.0359768	Bivalent with poised RNAPII
NM_177033	Vwc2	chr11	11014018	11163529	+	39.0624	234.257	15.373	81.618	14.1558	27.5506	16.7389	0.122395	Bivalent with poised RNAPII
NM_198247	Sertad4	chr1	194670681	194681946	-	80.4225	188.784	17.7381	21.3762	12.9424	20.663	17.9788	0	Bivalent with poised RNAPII
NM_173414	Lancl3	chrX	8777098	8845211	+	80.9969	220.018	7.09522	14.5746	6.47121	6.19889	13.6391	0.0111136	Bivalent with poised RNAPII
NM_001001738	Itprip	chr19	47969085	47993789	-	125.229	107.483	23.6507	61.2135	12.1335	23.418	14.879	0.255065	Bivalent with poised RNAPII
NM_080285	Cttnbp2	chr6	18316476	18464825	-	63.1891	173.626	13.5992	36.4366	8.89792	19.2854	14.879	0.15146	Bivalent with poised RNAPII
NM_144955	Nkx6-1	chr5	102088215	102093730	-	39.6368	197.511	10.6428	211.332	11.3246	260.353	26.6582	0	Bivalent with poised RNAPII
NM_175096	Stbd1	chr5	93032076	93035605	+	53.4235	158.927	13.5992	17.9754	7.68457	22.7293	25.4183	0.254935	Bivalent with poised RNAPII
NM_011448	Sox9	chr11	112643523	112649071	+	27.5734	200.267	15.9642	238.053	18.6047	177.013	19.2187	0.0314303	Bivalent with poised RNAPII
NM_008873	Plau	chr14	21655883	21662610	+	35.0412	121.722	20.1031	48.5822	18.2003	22.7293	22.9385	0.59831	Bivalent with poised RNAPII
NM_011520	Sdc3	chr4	130348451	130382233	+	38.4879	151.578	20.6944	75.7882	20.627	23.418	22.9385	0.433124	Bivalent with poised RNAPII
NM_177034	Apba1	chr19	23833365	24024087	+	161.419	134.583	24.242	125.342	17.3914	24.1068	19.2187	0.154226	Bivalent with poised RNAPII
NM_001029838	Pknox2	chr9	36698566	36954851	-	49.9768	125.856	21.2857	80.1606	19.4136	190.788	23.5584	1.31966e-05	Bivalent with poised RNAPII
NM_001081262	Fam194a	chr3	58420221	58441129	-	33.8923	62.0092	11.2341	23.3194	11.3246	25.4843	19.8387	0.0207337	Bivalent with poised RNAPII
NM_013880	Plcl2	chr17	50648871	50827819	+	51.1257	142.851	18.3293	25.7485	14.9647	15.1528	22.3185	0.397208	Bivalent with poised RNAPII
NM_028757	Nebl	chr2	17268360	17652695	-	38.4879	229.664	18.9206	45.1814	20.627	44.081	23.5584	0.0446233	Bivalent with poised RNAPII
NM_033073	Krt7	chr15	101242833	101258237	+	39.0624	119.425	14.1904	27.206	14.9647	18.5967	29.758	8.09161	Bivalent with poised RNAPII
NM_018867	Cpxm2	chr7	139234492	139346424	-	30.4457	138.258	14.7817	16.5179	15.7736	19.9742	24.7984	0.0375188	Bivalent with poised RNAPII
NM_009399	Tnfrsf11a	chr1	107677299	107744558	+	109.719	208.075	21.8769	46.6389	20.627	19.9742	20.4586	0.0771535	Bivalent with poised RNAPII
NM_001034874	Shisa6	chr11	66025226	66339628	-	59.168	190.621	9.4603	116.597	7.68457	44.081	17.9788	0.0283593	Bivalent with poised RNAPII
NM_011261	Reln	chr5	21390271	21850523	-	77.5503	275.596	13.0079	81.1322	13.7513	25.4843	21.0786	0.0611016	Bivalent with poised RNAPII
NM_001024139	Adamts15	chr9	30706739	30730037	-	99.9537	131.368	20.6944	61.2135	17.3914	22.7293	19.8387	0.137107	Bivalent with poised RNAPII
NM_177360	Dmrt3	chr19	25685026	25698411	+	72.9547	255.386	21.2857	128.257	23.0537	773.484	25.4183	0.245402	Bivalent with poised RNAPII
NM_133485	Ppp1r14c	chr10	6881565	6980391	-	80.9969	138.258	10.6428	31.5784	14.1558	22.7293	20.4586	0.195753	Bivalent with poised RNAPII
NM_021286	Sez6	chr11	77744444	77792544	+	47.6791	247.577	16.5555	129.714	23.4582	22.0405	26.0383	5.88606e-05	Bivalent with poised RNAPII
NM_176846	Exph5	chr9	53109774	53189263	+	29.2968	77.167	13.5992	42.7523	15.3691	17.9079	16.1189	0.0395652	Bivalent with poised RNAPII
NM_177052	Kif6	chr17	49754496	50049172	+	45.9557	76.7077	15.9642	44.2098	17.7958	15.8416	15.499	0.124235	Bivalent with poised RNAPII
NM_011246	Rasgrp1	chr2	117105728	117168613	-	90.1881	119.884	16.5555	51.4971	12.1335	19.2854	20.4586	0.219115	Bivalent with poised RNAPII
NM_153177	Ago4	chr4	126166786	126210702	-	109.719	151.578	14.1904	46.6389	13.7513	24.1068	15.499	0.261558	Bivalent with poised RNAPII
NM_001081142	Kcnq4	chr4	120370077	120419781	-	48.2535	164.899	11.8254	77.7315	9.70682	64.744	17.9788	0.0178882	Bivalent with poised RNAPII
NM_153507	Cpne2	chr8	97056927	97094429	+	48.2535	173.166	21.8769	63.1568	19.0092	27.5506	28.5181	0.41322	Bivalent with poised RNAPII
NM_010103	Edil3	chr13	88961076	89462830	+	39.6368	145.607	17.7381	57.8128	18.6047	15.1528	14.879	0.0158589	Bivalent with poised RNAPII
NM_011212	Ptpre	chr7	142729506	142877977	+	51.7002	133.664	12.4166	41.2948	12.9424	28.2394	17.3589	0.0713916	Bivalent with poised RNAPII
NM_010408	Hcn1	chr13	118391126	118769835	+	62.0402	101.052	17.1468	21.862	15.3691	20.663	12.3992	0.0535989	Bivalent with poised RNAPII
NM_008830	Abcb4	chr5	8893720	8959226	+	52.8491	201.645	28.9722	21.862	19.8181	17.9079	17.3589	0.0960195	Bivalent with poised RNAPII
NM_172885	Tmem132d	chr5	128263860	128938937	-	62.0402	163.061	13.0079	66.0717	11.7291	15.8416	16.1189	0.0304124	Bivalent with poised RNAPII
NM_173386	Mb21d1	chr9	78278324	78290954	-	52.2746	244.362	26.0158	86.9621	20.2225	39.9484	14.2591	0.212551	Bivalent with poised RNAPII
NM_177047	Auts2	chr5	131913551	133018213	-	207.375	87.7315	28.9722	46.1531	19.8181	26.8619	28.5181	0.952392	Bivalent with poised RNAPII
NM_029614	Prss23	chr7	96656294	96666096	-	54.5724	157.549	15.373	49.068	15.3691	24.7956	14.879	3.21112	Bivalent with poised RNAPII
NM_181317	Kcns2	chr15	34767109	34773162	+	80.4225	137.798	20.1031	50.5255	20.2225	22.7293	22.3185	0	Bivalent with poised RNAPII
NM_008737	Nrp1	chr8	130882972	131029375	+	76.9758	224.152	16.5555	116.597	16.9869	33.0607	22.9385	0.0578101	Bivalent with poised RNAPII
NM_007562	Bnc1	chr7	89111547	89137185	-	32.7434	226.908	12.4166	85.0188	12.538	30.9945	27.2782	0.0277876	Bivalent with poised RNAPII
NM_027828	Fam110c	chr12	31758832	31764805	+	72.9547	131.368	13.0079	31.5784	14.5602	11.709	20.4586	0.150686	Bivalent with poised RNAPII
NM_019514	Astn2	chr4	65041836	66065517	-	45.9557	146.066	8.86903	38.3799	14.1558	24.1068	17.9788	0.0184753	Bivalent with poised RNAPII
NM_145158	Emilin2	chr17	71601515	71660305	-	71.8058	175.463	15.373	67.5292	12.1335	19.9742	18.5988	0.0668616	Bivalent with poised RNAPII
NM_025817	Tril	chr6	53765461	53770819	-	44.8068	203.482	13.0079	261.858	20.627	92.9834	24.1784	0.136237	Bivalent with poised RNAPII
NM_183408	Pde4a	chr9	20970157	21017692	+	66.6358	235.176	27.1983	130.2	17.7958	23.418	26.6582	0.0816125	Bivalent with poised RNAPII
NM_146241	Trhde	chr10	113835876	114238426	-	46.5302	221.855	10.6428	162.75	11.7291	23.418	24.1784	0	Bivalent with poised RNAPII
NM_023537	Rab3b	chr4	108551674	108615929	+	75.8269	105.186	23.6507	42.2665	19.0092	25.4843	22.3185	0.331309	Bivalent with poised RNAPII
NM_198962	Hcrtr2	chr9	76073686	76171385	-	49.4024	95.9994	56.1705	68.015	61.0721	15.8416	17.3589	0.0117188	Bivalent with poised RNAPII
NM_177167	Ppm1e	chr11	87040407	87172496	-	154.526	190.162	15.373	59.2702	13.3469	22.0405	16.1189	0.648894	Bivalent with poised RNAPII
NM_013904	Hey2	chr10	30552164	30562589	-	120.634	208.075	21.2857	59.7561	16.178	34.4383	16.7389	0.195081	Bivalent with poised RNAPII
NM_009181	St8sia2	chr7	81084005	81158568	-	46.5302	191.54	10.0516	70.93	12.1335	59.9226	26.0383	0.039938	Bivalent with poised RNAPII
NM_009520	Wnt2b	chr3	104747722	104764627	-	39.0624	196.133	25.4245	106.881	17.3914	32.372	35.9576	0.208381	Bivalent with poised RNAPII
NM_001008700	Il4ra	chr7	132695795	132722988	+	64.9124	141.932	21.8769	41.7807	17.3914	13.7753	22.9385	0.109804	Bivalent with poised RNAPII
NM_001040689	Rspo4	chr2	151668662	151700404	+	45.3813	169.492	20.6944	51.9829	21.0314	15.1528	17.3589	0.114307	Bivalent with poised RNAPII
NM_010910	Nefl	chr14	68701940	68705794	+	137.867	156.171	14.1904	53.4404	10.1113	36.5046	44.0171	2.11322	Bivalent with poised RNAPII
NM_178086	Fa2h	chr8	113869037	113917721	-	88.4648	112.535	14.7817	12.1455	14.1558	21.3517	16.7389	0.0180444	Bivalent with poised RNAPII
NM_011894	Sh3bp5	chr14	32187149	32249219	-	83.2947	141.932	21.2857	36.9224	14.9647	24.7956	29.758	0.67323	Bivalent with poised RNAPII
NM_178774	Prr18	chr17	8533603	8536978	+	42.509	156.171	30.1547	101.537	31.1427	28.9282	26.0383	0.176116	Bivalent with poised RNAPII
NM_016900	Cav2	chr6	17231184	17239130	+	33.3179	129.53	10.0516	31.5784	10.9202	17.2191	14.2591	0.292139	Bivalent with poised RNAPII
NM_010658	Mafb	chr2	160189412	160192801	-	43.0835	180.975	18.9206	227.85	19.0092	156.35	34.7177	0.0777925	Bivalent with poised RNAPII
NM_008125	Gjb2	chr14	57717438	57723539	-	52.2746	227.826	4.73015	42.7523	7.68457	35.8158	13.6391	0.619265	Bivalent with poised RNAPII
NM_138945	Pou4f3	chr18	42554250	42555747	+	37.339	207.157	21.2857	141.86	21.0314	48.2136	26.0383	0	Bivalent with poised RNAPII
NM_172987	Nkain3	chr4	20170999	20705815	-	65.4869	128.152	13.5992	42.2665	10.5157	70.2541	12.3992	0.0307564	Bivalent with poised RNAPII
NM_027921	Slc16a14	chr1	84903279	84931658	-	110.868	156.631	15.9642	63.6426	20.2225	20.663	27.2782	0.0769855	Bivalent with poised RNAPII
NM_027864	Galnt14	chr17	73843090	74059791	-	47.6791	192.917	13.0079	24.2911	10.5157	31.6832	26.6582	0.0729745	Bivalent with poised RNAPII
NM_172788	Sh3rf3	chr10	58276106	58601664	+	85.0181	175.004	11.8254	78.2173	11.3246	29.6169	21.6986	0.096282	Bivalent with poised RNAPII
NM_178723	Zfp385b	chr2	77248688	77654873	-	25.8501	252.63	11.8254	25.7485	10.1113	34.4383	29.758	0	Bivalent with poised RNAPII
NM_008259	Foxa1	chr12	58641618	58647108	-	43.6579	224.152	23.6507	85.0188	16.178	135.687	23.5584	0.0830572	Bivalent with poised RNAPII
NM_178240	Trim50	chr5	135829165	135843524	+	28.1479	99.674	17.1468	37.8941	14.1558	20.663	23.5584	0.297537	Bivalent with poised RNAPII
NM_001081421	Galnt16	chr12	81619976	81704883	+	95.3581	288.917	15.373	140.402	12.9424	70.9429	35.3377	0.0777954	Bivalent with poised RNAPII
NM_010747	Lyn	chr4	3605267	3718759	+	84.4436	144.229	14.7817	86.9621	15.7736	22.7293	31.6179	0.647421	Bivalent with poised RNAPII
NM_001037539	Prok2	chr6	99661292	99676386	-	41.9346	193.836	19.5119	56.8411	15.7736	24.1068	23.5584	0.165548	Bivalent with poised RNAPII
NM_011812	Fbln5	chr12	102984774	103057329	-	44.2324	143.769	15.373	36.9224	14.9647	13.7753	17.3589	0.108908	Bivalent with poised RNAPII
NM_199251	Kcnk12	chr17	88145160	88197334	-	69.508	195.214	21.2857	101.537	19.4136	73.0092	24.1784	0.118065	Bivalent with poised RNAPII
NM_016917	Slc40a1	chr1	45964914	45982439	-	133.272	70.7364	22.4682	38.8657	16.178	19.9742	22.3185	3.31555	Bivalent with poised RNAPII
NM_144852	Slc7a4	chr16	17572110	17576764	-	74.678	119.884	23.6507	45.6672	19.8181	12.3978	22.3185	0.750298	Bivalent with poised RNAPII
NM_148931	Slc6a5	chr7	57167069	57214863	+	29.8712	214.965	20.1031	43.2381	16.5825	33.0607	19.2187	0	Bivalent with poised RNAPII
NM_173451	Arsj	chr3	126066769	126143292	+	31.0201	118.966	12.4166	26.2344	12.1335	17.2191	10.5393	0.0118465	Bivalent with poised RNAPII
NM_007500	Atoh1	chr6	64679139	64681229	+	50.5513	242.066	26.6071	239.024	20.2225	86.7845	25.4183	0.0218869	Bivalent with poised RNAPII
NM_175647	Dmrta1	chr4	89354888	89361457	+	52.8491	149.281	7.09522	42.7523	8.49347	30.9945	13.6391	0.0106743	Bivalent with poised RNAPII
NM_173863	Crtc3	chr7	87731517	87833763	-	91.337	163.98	21.2857	84.533	20.2225	50.2799	22.3185	0.260986	Bivalent with poised RNAPII
NM_178593	Rcsd1	chr1	167579075	167638225	-	48.8279	189.243	13.5992	70.4441	21.8403	34.4383	26.0383	1.28831e-05	Bivalent with poised RNAPII
NM_001081347	Rhobtb1	chr10	68675404	68754532	+	74.678	159.387	13.5992	63.1568	14.9647	30.3057	32.8578	0.000646073	Bivalent with poised RNAPII
NM_145492	Zfp521	chr18	13845522	14131242	-	49.4024	156.171	16.5555	24.7769	6.87567	47.5248	21.0786	0.104185	Bivalent with poised RNAPII
NM_008926	Prkg2	chr5	99358791	99466098	-	52.2746	180.516	7.09522	54.412	10.5157	15.1528	16.1189	0.055167	Bivalent with poised RNAPII
NM_058212	Dpf3	chr12	84369997	84828686	-	103.4	203.482	30.1547	154.977	19.4136	55.79	21.6986	0	Bivalent with poised RNAPII
NM_025961	Gatm	chr2	122420208	122437013	-	40.2113	184.65	12.4166	6.8015	12.9424	19.2854	27.8982	0.287624	Bivalent with poised RNAPII
NM_008208	H2-T3	chr17	36322515	36327096	-	42.509	124.937	17.1468	17.9754	23.4582	37.1933	48.3568	0.167297	Bivalent with poised RNAPII
NM_033593	Pcdhga10	chr18	37906841	38001524	+	51.1257	316.936	48.484	85.0188	37.2095	34.4383	27.2782	0.0372476	Bivalent with poised RNAPII
NM_010230	Fmn1	chr2	113167892	113556924	+	82.1458	103.808	17.1468	38.8657	19.8181	13.0865	21.0786	0	Bivalent with poised RNAPII
NM_001081124	Map7d2	chrX	155852509	155936879	+	80.4225	87.2722	13.0079	23.8053	11.3246	6.88766	11.7792	1.47088	Bivalent with poised RNAPII
NM_172485	Thsd7b	chr1	131169880	132115855	+	49.4024	149.741	15.9642	42.7523	11.3246	14.4641	13.0191	0.00682857	Bivalent with poised RNAPII
NM_001081009	Parp8	chr13	117643630	117814323	-	69.508	186.487	9.4603	49.5538	8.89792	38.5709	18.5988	0.25772	Bivalent with poised RNAPII
NM_009116	Prrx2	chr2	30700886	30736767	+	61.4658	124.937	15.9642	78.2173	21.4359	19.9742	17.9788	0.936203	Bivalent with poised RNAPII
NM_010096	Ebf3	chr7	144385353	144506128	-	47.1046	235.635	8.27776	240.968	6.47121	244.512	16.7389	0.0705247	Bivalent with poised RNAPII
NM_015739	Gbx1	chr5	24010243	24032666	-	55.1469	282.027	19.5119	62.671	22.2448	24.1068	23.5584	0.297537	Bivalent with poised RNAPII
NM_018744	Sema6a	chr18	47404907	47528522	-	80.4225	176.841	18.3293	146.232	14.1558	66.1215	29.758	0.191409	Bivalent with poised RNAPII
NM_009369	Tgfbi	chr13	56710963	56740700	+	26.999	135.502	18.9206	76.7598	18.6047	22.7293	19.8387	0.500664	Bivalent with poised RNAPII
NM_008615	Me1	chr9	86474969	86589947	-	106.273	102.889	14.7817	38.8657	15.7736	13.0865	19.2187	3.01621	Bivalent with poised RNAPII
NM_020043	Igdcc4	chr9	64949301	64985750	+	74.678	143.769	22.4682	114.654	18.2003	49.5911	30.378	1.50066	Bivalent with poised RNAPII
NM_172466	Adamts18	chr8	116222036	116372739	-	45.3813	199.807	13.5992	24.7769	15.3691	26.8619	19.8387	0	Bivalent with poised RNAPII
NM_080563	Rnf144a	chr12	26991662	27100121	-	114.889	106.105	24.8333	38.8657	15.7736	18.5967	16.7389	0.565408	Bivalent with poised RNAPII
NM_177378	Rnf150	chr8	85387254	85615170	+	106.847	124.937	8.86903	39.3516	11.3246	25.4843	18.5988	0	Bivalent with poised RNAPII
NM_028785	Dock8	chr19	25074018	25276922	+	114.889	263.195	14.7817	27.206	16.5825	30.3057	21.6986	0.0217242	Bivalent with poised RNAPII
NM_010453	Hoxa5	chr6	52151752	52154586	-	43.6579	250.793	15.9642	148.176	18.2003	316.143	23.5584	0.0246704	Bivalent with poised RNAPII
NM_015812	Rgs6	chr12	83718024	84259799	+	68.3591	194.755	14.1904	18.947	14.1558	19.9742	21.6986	0	Bivalent with poised RNAPII
NM_008667	Nab1	chr1	52512692	52557292	-	97.0815	144.229	26.6071	38.3799	16.9869	19.9742	8.67943	0.803397	Bivalent with poised RNAPII
NM_021302	Stk32c	chr7	146289536	146374393	-	64.338	161.683	14.1904	37.4083	14.5602	15.1528	25.4183	0	Bivalent with poised RNAPII
NM_205769	Crh	chr3	19593400	19595396	-	78.1247	81.7603	21.8769	78.7031	16.5825	7.57642	21.6986	0	Bivalent with poised RNAPII
NM_008166	Grid1	chr14	35633321	36394301	+	64.9124	235.635	20.1031	194.329	11.3246	121.912	26.0383	0.076852	Bivalent with poised RNAPII
NM_009538	Plagl1	chr10	12810593	12851501	+	53.998	114.373	18.3293	32.0642	10.5157	18.5967	270.922	1.1598	Bivalent with poised RNAPII
NM_199240	Sema6d	chr2	124436031	124493506	+	80.4225	163.061	15.9642	25.7485	11.3246	19.2854	26.0383	4.64948e-05	Bivalent with poised RNAPII
NM_007406	Adcy7	chr8	90796301	90853861	+	33.8923	177.76	18.9206	16.0321	16.9869	16.5304	33.4778	0	Bivalent with poised RNAPII
NM_011356	Frzb	chr2	80252126	80287553	-	48.2535	232.879	23.6507	67.0434	17.7958	24.7956	26.6582	0.076014	Bivalent with poised RNAPII
NM_001081175	Itpkb	chr1	182260606	182353790	+	48.8279	150.659	18.9206	48.0963	19.0092	19.9742	28.5181	0.177122	Bivalent with poised RNAPII
NM_178220	Arrb1	chr7	106683995	106755281	+	52.2746	103.349	17.1468	150.605	13.3469	14.4641	14.2591	0.63551	Bivalent with poised RNAPII
NM_011545	Tcf21	chr10	22537078	22539934	-	35.0412	124.478	10.0516	25.7485	8.49347	15.8416	25.4183	0.0402394	Bivalent with poised RNAPII
NM_001010941	Gpr12	chr5	147393725	147396815	-	42.509	157.09	18.9206	27.6918	13.7513	22.0405	19.8387	0	Bivalent with poised RNAPII
NM_001033171	Klrg2	chr6	38576659	38587239	-	68.3591	202.563	34.2936	83.5613	26.6938	24.7956	29.758	0.21853	Bivalent with poised RNAPII
NM_029679	Fam65b	chr13	24730516	24825675	+	71.8058	192.917	8.27776	71.9016	12.1335	16.5304	26.0383	1.33821e-05	Bivalent with poised RNAPII
NM_019949	Ube2l6	chr2	84638984	84650160	+	45.9557	85.8942	16.5555	35.465	15.3691	20.663	13.6391	2.26676	Bivalent with poised RNAPII
NM_001039354	Lin7a	chr10	106708886	106862199	+	51.1257	188.324	7.68649	52.4687	8.49347	25.4843	16.1189	0.000147614	Bivalent with poised RNAPII
NM_029662	Mfsd2a	chr4	122624093	122638431	-	47.1046	227.367	15.373	71.4158	12.9424	40.6372	39.0574	0.169702	Bivalent with poised RNAPII
NM_024286	Popdc3	chr10	45009110	45038256	+	37.339	185.109	16.5555	34.0075	14.9647	14.4641	22.3185	0.0501189	Bivalent with poised RNAPII
NM_175256	Heg1	chr16	33684551	33768281	+	61.4658	193.836	21.2857	24.2911	25.076	32.372	14.879	0.288825	Bivalent with poised RNAPII
NM_019958	Rgs17	chr10	4424140	4520877	+	82.1458	134.124	14.1904	23.8053	12.9424	18.5967	14.879	0.072984	Bivalent with poised RNAPII
NM_001033212	Rprml	chr11	103510822	103511894	+	37.339	175.463	11.8254	68.5009	16.5825	19.2854	24.7984	0.142508	Bivalent with poised RNAPII
NM_178779	Rnf152	chr1	107173493	107253287	-	129.825	104.727	20.1031	99.1076	15.3691	21.3517	18.5988	2.42774e-05	Bivalent with poised RNAPII
NM_001024138	Gpr139	chr7	126287836	126327888	-	56.2958	163.061	21.2857	115.14	14.5602	18.5967	17.9788	0	Bivalent with poised RNAPII
NM_009856	Cd83	chr13	43880475	43898501	+	33.8923	166.736	15.9642	63.1568	12.1335	16.5304	22.9385	0.00181243	Bivalent with poised RNAPII
NM_026376	Plxnd1	chr6	115904828	115945023	-	75.2525	138.258	15.9642	152.062	12.9424	28.2394	32.8578	0.135575	Bivalent with poised RNAPII
NM_008137	Gna14	chr19	16510156	16685308	+	97.6559	90.4875	14.1904	107.367	17.3914	21.3517	21.0786	0.727433	Bivalent with poised RNAPII
NM_021442	Mecom	chr3	30135490	30408409	-	82.1458	211.291	24.242	82.1039	15.3691	309.256	22.3185	0	Bivalent with poised RNAPII
NM_178915	Tmem179	chr12	113738394	113749371	-	47.1046	78.545	26.0158	29.1493	21.4359	26.8619	21.0786	0.628109	Bivalent with poised RNAPII
NM_011160	Prkg1	chr19	30638976	31738860	-	58.5935	205.319	15.373	66.0717	15.3691	109.514	19.2187	0.0431245	Bivalent with poised RNAPII
NM_007514	Slc7a2	chr8	41947720	42007424	+	41.3601	194.755	5.91268	32.5501	9.70682	13.7753	16.1189	0.725676	Bivalent with poised RNAPII
NM_001001309	Itga8	chr2	12028286	12223547	-	62.0402	124.478	18.3293	26.7202	12.1335	19.9742	15.499	0.0518348	Bivalent with poised RNAPII
NM_033594	Pcdhga11	chr18	37915426	38001526	+	64.9124	330.256	59.7181	85.0188	51.3653	28.2394	18.5988	0.189572	Bivalent with poised RNAPII
NM_020496	Tbx20	chr9	24544691	24578747	-	36.1901	265.032	17.1468	132.143	15.3691	46.8361	21.0786	0	Bivalent with poised RNAPII
NM_010573	Irx1	chr13	72095679	72101171	-	35.0412	187.865	12.4166	80.6464	13.7513	61.9889	19.8387	0.0888656	Bivalent with poised RNAPII
NM_023122	Gpm6b	chrX	162676874	162826965	+	32.7434	116.21	6.50395	47.1247	4.44896	9.64272	6.19959	1.25218e-05	Bivalent with poised RNAPII
NM_174988	Cdh22	chr2	164937006	165060237	-	31.0201	215.884	23.0595	98.6218	20.627	208.696	26.0383	0.0976848	Bivalent with poised RNAPII
NM_152803	Hpse	chr5	101108504	101148702	-	42.509	184.65	14.7817	32.5501	15.7736	44.7698	17.9788	0.631294	Bivalent with poised RNAPII
NM_009523	Wnt4	chr4	136833549	136855416	+	55.1469	190.621	21.2857	74.3307	18.6047	26.8619	30.9979	0.216816	Bivalent with poised RNAPII
NM_023504	Nkx2-4	chr2	146909611	146911081	-	42.509	217.262	20.1031	119.026	12.9424	42.7035	16.1189	0	Bivalent with poised RNAPII
NM_001033380	Itpripl2	chr7	125628625	125635489	-	62.6147	175.922	14.7817	184.612	13.7513	49.5911	29.1381	0.806296	Bivalent with poised RNAPII
NM_198029	Fermt1	chr2	132729914	132771772	-	58.5935	105.645	20.6944	59.7561	15.7736	22.7293	24.1784	0.392511	Bivalent with poised RNAPII
NM_025278	Gng12	chr6	66846390	66971355	+	137.867	125.396	23.0595	64.6143	22.6493	20.663	27.2782	0	Bivalent with poised RNAPII
NM_183027	Ap1s3	chr1	79603450	79668547	-	114.315	69.8178	14.7817	23.8053	12.9424	20.663	19.8387	1.18988	Bivalent with poised RNAPII
NM_025809	Clec14a	chr12	59365706	59370245	-	35.0412	115.75	11.8254	16.5179	15.3691	21.3517	19.8387	0	Bivalent with poised RNAPII
NM_138683	Rspo1	chr4	124663673	124686343	+	65.4869	172.707	17.7381	56.3553	12.538	27.5506	27.2782	0.582372	Bivalent with poised RNAPII
NM_008262	Onecut1	chr9	74709727	74737454	+	47.1046	180.975	20.1031	237.081	22.6493	42.7035	32.8578	0	Bivalent with poised RNAPII
NM_145375	Tm6sf1	chr7	89003907	89028954	+	53.4235	176.841	26.6071	79.6748	20.627	15.8416	26.6582	0	Bivalent with poised RNAPII
NM_009578	Ikzf1	chr11	11586215	11672929	+	122.932	159.846	28.9722	64.6143	17.7958	68.8766	17.9788	0	Bivalent with poised RNAPII
NM_033525	Npnt	chr3	132545658	132613255	-	86.167	172.248	12.4166	53.4404	13.3469	36.5046	14.2591	0.124135	Bivalent with poised RNAPII
NM_008471	Krt19	chr11	100002125	100007233	-	68.3591	75.789	24.242	36.9224	19.4136	30.9945	19.8387	9.88128	Bivalent with poised RNAPII
NM_001081278	Tbc1d4	chr14	101841576	102008408	-	222.885	221.396	15.9642	93.7636	20.2225	39.2596	19.2187	0.481281	Bivalent with poised RNAPII
NM_016866	Stk39	chr2	68048503	68310038	-	109.145	164.899	15.9642	65.5859	14.1558	107.447	19.8387	0.624224	Bivalent with poised RNAPII
NM_008077	Gad1	chr2	70400220	70440069	+	63.7636	221.396	20.6944	159.35	15.3691	70.9429	26.0383	0.491104	Bivalent with poised RNAPII
NM_010634	Fabp5	chr3	10012584	10016610	+	83.8692	138.258	20.6944	77.2456	22.6493	19.9742	26.0383	1.37579	Bivalent with poised RNAPII
NM_020492	Glra1	chr11	55328314	55421292	-	29.8712	109.779	13.0079	33.0359	12.1335	26.1731	29.758	0	Bivalent with poised RNAPII
NM_010905	Nfia	chr4	97444316	97785567	+	55.7213	175.463	10.0516	55.3837	6.06676	30.3057	13.0191	0	Bivalent with poised RNAPII
NM_001013833	Prkg1	chr19	30638976	31839523	-	66.0613	170.87	12.4166	63.1568	12.9424	160.482	15.499	5.10044e-05	Bivalent with poised RNAPII
NM_011912	Vax2	chr6	83661257	83688298	+	56.8702	249.415	21.2857	191.9	23.4582	358.158	24.7984	0.0400832	Bivalent with poised RNAPII
NM_008002	Fgf10	chr13	119503505	119581380	+	70.0825	134.583	26.0158	49.5538	17.3914	18.5967	21.0786	0.794255	Bivalent with poised RNAPII
NM_201531	Kcnf1	chr12	17178905	17183694	-	37.339	161.224	18.3293	99.5934	16.5825	23.418	20.4586	0.117105	Bivalent with poised RNAPII
NM_148950	Pknox2	chr9	36698566	36954899	-	49.9768	125.856	21.2857	79.1889	19.0092	189.411	21.6986	0.0891771	Bivalent with poised RNAPII
NM_138652	Atp12a	chr14	56983904	57007388	+	59.168	177.76	10.0516	27.206	6.87567	22.0405	20.4586	0.694369	Bivalent with poised RNAPII
NM_009027	Rasgrf2	chr13	92020011	92901449	-	61.4658	191.999	14.7817	34.4933	13.3469	21.3517	24.7984	0.0940014	Bivalent with poised RNAPII
NM_010167	Eya4	chr10	22823973	23069709	-	47.1046	147.903	9.4603	87.9337	8.08902	132.932	14.2591	0.0212062	Bivalent with poised RNAPII
NM_178714	Lrfn5	chr12	62625618	62946245	+	36.1901	163.061	8.86903	80.6464	11.3246	16.5304	13.0191	0.0117255	Bivalent with poised RNAPII
NM_022982	Rtn4r	chr16	18127798	18152501	+	63.1891	204.401	16.5555	52.9546	14.5602	7.57642	23.5584	0.123574	Bivalent with poised RNAPII
NM_033592	Pcdhga9	chr18	37896589	38001517	+	32.169	193.377	42.5713	47.6105	47.7252	24.1068	13.0191	0.172051	Bivalent with poised RNAPII
NM_010762	Mal	chr2	127458961	127482431	-	27.5734	189.243	13.5992	44.2098	14.9647	39.9484	31.6179	3.7974e-06	Bivalent with poised RNAPII
NM_008115	Gfra2	chr14	71289936	71379645	+	35.6157	218.18	6.50395	42.2665	5.66231	284.46	24.7984	0	Bivalent with poised RNAPII
NM_010053	Dlx1	chr2	71367501	71372037	+	61.4658	269.625	35.4761	259.915	26.2893	267.93	25.4183	0.0320694	Bivalent with poised RNAPII
NM_001001980	Limch1	chr5	67137078	67448398	+	85.0181	169.032	11.8254	84.533	15.7736	55.1012	26.6582	0	Bivalent with poised RNAPII
NM_019507	Tbx21	chr11	96959320	96976645	-	40.2113	197.511	21.2857	65.1001	21.4359	29.6169	25.4183	0.0703347	Bivalent with poised RNAPII
NM_029838	Col25a1	chr3	129883762	130302801	+	38.4879	129.071	17.1468	34.4933	22.6493	26.8619	19.8387	2.00959e-07	Bivalent with poised RNAPII
NM_153413	Dock3	chr9	106795155	107134240	-	99.3792	226.448	18.3293	49.5538	11.7291	17.9079	17.3589	0.368381	Bivalent with poised RNAPII
NM_030024	Prr15	chr6	54277005	54280194	+	44.2324	140.095	19.5119	37.4083	16.5825	24.7956	23.5584	0.0701016	Bivalent with poised RNAPII
NM_011766	Zfpm2	chr15	40486587	40936138	+	93.0603	186.487	11.8254	83.5613	8.89792	40.6372	12.3992	0.0779296	Bivalent with poised RNAPII
NM_010392	H2-Q2	chr17	35479277	35482667	+	37.339	54.66	15.9642	34.4933	14.9647	11.0202	14.2591	0.552869	Bivalent with poised RNAPII
NM_153509	AF529169	chr9	89484871	89517824	-	44.2324	134.583	14.1904	89.877	12.9424	25.4843	16.1189	0.0306606	Bivalent with poised RNAPII
NM_010345	Grb10	chr11	11830501	11937423	-	189.567	213.587	13.0079	52.4687	15.3691	28.9282	29.758	1.90103	Bivalent with poised RNAPII
NM_178396	Car12	chr9	66561492	66614652	+	41.3601	131.827	18.9206	29.1493	10.5157	13.7753	33.4778	1.82262	Bivalent with poised RNAPII
NM_008970	Pthlh	chr6	147200631	147212607	-	25.2756	205.319	11.8254	54.412	12.538	23.418	26.6582	0	Bivalent with poised RNAPII
NM_033314	Slco2a1	chr9	102910818	102990179	+	52.2746	144.688	24.242	67.5292	19.0092	22.0405	28.5181	2.95531	Bivalent with poised RNAPII
NM_198214	Snph	chr2	151416285	151458269	-	48.2535	210.372	14.7817	37.4083	14.5602	24.7956	17.3589	0	Bivalent with poised RNAPII
NM_198610	Igsf21	chr4	139582766	139802726	-	42.509	139.176	23.6507	64.1285	23.4582	34.4383	19.8387	0.71246	Bivalent with poised RNAPII
NM_007424	Acan	chr7	86198368	86259985	+	49.9768	205.779	23.0595	54.8978	12.538	28.9282	16.1189	0.202178	Bivalent with poised RNAPII
NM_009668	Bin1	chr18	32536870	32595394	+	123.506	169.951	10.6428	89.3912	16.5825	139.819	17.3589	0.248925	Bivalent with poised RNAPII
NM_007407	Adcyap1r1	chr6	55401973	55451449	+	66.0613	154.334	14.7817	39.3516	9.30237	13.7753	16.7389	0.164094	Bivalent with poised RNAPII
NM_153412	Phldb2	chr16	45746343	45844491	-	117.762	154.334	30.1547	31.5784	23.0537	24.7956	16.1189	4.0828	Bivalent with poised RNAPII
NM_008314	Htr5a	chr5	28168486	28181626	+	45.9557	77.167	14.1904	48.5822	17.7958	26.1731	35.3377	0.0153777	Bivalent with poised RNAPII
NM_013494	Cpe	chr8	67071348	67171837	-	55.1469	139.636	14.7817	34.0075	17.7958	17.9079	15.499	2.4693	Bivalent with poised RNAPII
NM_008596	Sypl2	chr3	108015183	108029517	-	47.1046	203.023	18.9206	39.8374	19.0092	24.1068	22.9385	0.0271402	Bivalent with poised RNAPII
NM_008216	Has2	chr15	56497181	56526101	-	83.8692	102.43	14.1904	47.6105	10.5157	21.3517	18.5988	0.173787	Bivalent with poised RNAPII
NM_145586	Tmem159	chr7	127245939	127264500	+	41.3601	62.4685	26.0158	49.5538	19.0092	15.1528	22.9385	2.59775	Bivalent with poised RNAPII
NM_001033347	D430041D05Rik	chr2	103983231	104250491	-	42.509	295.807	16.5555	68.015	19.8181	28.2394	28.5181	0.0291567	Bivalent with poised RNAPII
NM_011446	Sox7	chr14	64562542	64569569	+	78.6992	210.831	9.4603	51.0113	11.3246	32.372	23.5584	1.26768	Bivalent with poised RNAPII
NM_001077202	Hs6st2	chrX	48740388	49034779	-	61.4658	120.803	7.68649	63.1568	7.68457	53.035	19.2187	0	Bivalent with poised RNAPII
NM_009323	Tbx15	chr3	99057682	99158183	+	29.8712	217.721	11.8254	63.6426	13.3469	293.414	23.5584	0.159634	Bivalent with poised RNAPII
NM_177793	Mettl24	chr10	40403087	40530889	+	67.2102	91.4061	15.373	17.0038	18.6047	21.3517	22.9385	0.124564	Bivalent with poised RNAPII
NM_177595	Mkx	chr18	6934963	7004777	-	76.9758	203.941	13.5992	60.7277	18.2003	20.663	21.0786	0.275565	Bivalent with poised RNAPII
NM_007553	Bmp2	chr2	133377894	133388632	+	46.5302	188.784	11.2341	88.9054	13.3469	55.79	26.0383	0.233381	Bivalent with poised RNAPII
NM_178906	AI593442	chr9	52481146	52487534	-	47.1046	139.636	15.9642	48.0963	19.4136	39.9484	17.9788	0.0227127	Bivalent with poised RNAPII
NM_080455	Tshz2	chr2	169459145	169714004	+	45.9557	127.234	13.0079	29.1493	12.1335	24.7956	7.43951	0.033655	Bivalent with poised RNAPII
NM_011719	Wnt9b	chr11	103588676	103611135	-	47.6791	287.539	18.9206	50.5255	16.178	53.035	18.5988	0	Bivalent with poised RNAPII
NM_001033535	Tnfaip8l3	chr9	53873412	53916218	-	69.508	146.985	17.1468	31.0926	16.178	28.2394	25.4183	0.102131	Bivalent with poised RNAPII
NM_008167	Grid2	chr6	63206850	64616273	+	57.4446	147.903	8.27776	41.2948	12.1335	32.372	13.6391	0	Bivalent with poised RNAPII
NM_011227	Rab20	chr8	11453976	11478499	-	60.8913	231.042	18.3293	171.495	21.0314	66.1215	26.6582	0.794868	Bivalent with poised RNAPII
NM_011578	Tgfbr3	chr5	107535588	107718614	-	63.1891	186.028	7.68649	122.913	12.9424	21.3517	17.9788	0.466091	Bivalent with poised RNAPII
NM_172426	Slc24a2	chr4	86629029	86876444	-	58.5935	177.3	16.5555	35.465	14.9647	20.663	9.91934	0	Bivalent with poised RNAPII
NM_198414	Paqr9	chr9	95460235	95462540	+	36.7646	266.41	17.1468	175.382	17.3914	30.3057	21.6986	0.0785964	Bivalent with poised RNAPII
NM_183064	Fgf12	chr16	28158669	28446161	-	54.5724	185.568	9.4603	40.809	12.9424	49.5911	22.3185	0	Bivalent with poised RNAPII
NM_001081206	Dgki	chr6	36796021	37249976	-	52.2746	193.377	15.373	22.3478	12.9424	22.7293	17.3589	0.00939949	Bivalent with poised RNAPII
NM_009829	Ccnd2	chr6	127075726	127101066	-	47.6791	201.645	14.1904	147.69	12.538	45.4585	37.8175	0.393239	Bivalent with poised RNAPII
NM_019990	Stard10	chr7	108469832	108494826	+	133.846	133.664	27.1983	36.4366	14.1558	17.9079	17.3589	4.06622	Bivalent with poised RNAPII
NM_028238	Rab38	chr7	95578782	95640082	+	27.5734	93.2435	13.5992	19.4329	11.7291	18.5967	23.5584	0.420753	Bivalent with poised RNAPII
NM_177382	Cyp2r1	chr7	121693681	121706486	-	28.7223	106.105	18.9206	46.6389	16.178	16.5304	23.5584	0.0647065	Bivalent with poised RNAPII
NM_020561	Smpdl3a	chr10	57514349	57531636	+	44.2324	118.506	14.7817	21.862	18.2003	16.5304	20.4586	0.49411	Bivalent with poised RNAPII
NM_008101	Gcgr	chr11	120392040	120400298	+	27.5734	250.333	15.373	54.8978	16.5825	20.663	22.3185	0.454623	Bivalent with poised RNAPII
NM_022882	Lpin2	chr17	71533317	71599158	+	137.867	180.975	27.7896	31.0926	25.8849	33.0607	16.7389	1.48899	Bivalent with poised RNAPII
NM_026924	Ovol2	chr2	144130911	144157816	-	161.419	145.607	21.2857	113.196	28.3116	38.5709	26.6582	0.160229	Bivalent with poised RNAPII
NM_029761	Dok5	chr2	170557306	170705275	+	61.4658	115.75	21.2857	17.4896	20.627	13.7753	25.4183	0.00215444	Bivalent with poised RNAPII
NM_145986	Fam83f	chr15	80502276	80530855	+	43.6579	149.281	14.7817	31.5784	14.9647	23.418	19.2187	0.162857	Bivalent with poised RNAPII
NM_177854	Sertm1	chr3	54700990	54719809	-	37.9135	148.822	13.0079	38.8657	13.3469	20.663	27.2782	0.272321	Bivalent with poised RNAPII
NM_008299	Dnajb3	chr1	90101306	90102323	-	45.9557	201.645	18.9206	27.206	19.4136	19.2854	18.5988	1.47056	Bivalent with poised RNAPII
NM_173030	Galnt13	chr2	54288797	54970155	+	75.8269	118.047	13.5992	25.2627	17.3914	15.1528	20.4586	0.024435	Bivalent with poised RNAPII
NM_199223	Rtn4rl2	chr2	84712102	84726849	-	64.338	203.941	18.9206	78.2173	21.8403	73.0092	21.6986	0	Bivalent with poised RNAPII
NM_010277	Gfap	chr11	102748649	102758514	-	32.7434	99.2147	20.1031	19.4329	22.2448	25.4843	23.5584	0.04929	Bivalent with poised RNAPII
NM_001002268	Gpr126	chr10	14122390	14264842	-	47.6791	111.617	11.2341	71.4158	14.5602	11.0202	21.6986	0.766999	Bivalent with poised RNAPII
NM_144945	Lgi2	chr5	52929102	52957519	-	62.6147	124.937	15.9642	10.2023	15.7736	22.7293	21.0786	0.574926	Bivalent with poised RNAPII
NM_028889	Efhd1	chr1	89160938	89207366	+	43.6579	218.18	21.8769	125.828	23.4582	50.2799	26.6582	0.721802	Bivalent with poised RNAPII
NM_001081205	Nipal1	chr5	73039034	73062317	+	53.4235	93.2435	30.746	49.5538	22.6493	16.5304	20.4586	0.0103223	Bivalent with poised RNAPII
NM_021375	Rhbg	chr3	88046795	88058606	-	38.4879	177.76	16.5555	38.8657	15.7736	17.9079	29.758	1.54659	Bivalent with poised RNAPII
NM_008384	Inpp1	chr1	52846263	52874532	-	78.1247	95.5401	17.7381	27.206	11.7291	13.0865	20.4586	0.946334	Bivalent with poised RNAPII
NM_007939	Epha8	chr4	136485333	136512731	-	49.4024	163.521	13.5992	57.8128	12.1335	26.8619	27.2782	0.274796	Bivalent with poised RNAPII
NM_007755	Cpeb1	chr7	88491911	88599644	-	47.1046	193.836	28.3809	81.618	19.0092	26.1731	32.2379	0.000582211	Bivalent with poised RNAPII
NM_025696	Sorcs3	chr19	48280514	48879995	+	39.0624	174.544	11.8254	67.5292	15.7736	26.8619	19.8387	0	Bivalent with poised RNAPII
NM_015734	Col5a1	chr2	27741944	27895030	+	100.528	133.664	18.9206	36.9224	14.9647	39.2596	24.1784	0.418232	Bivalent with poised RNAPII
NM_011376	Sim1	chr10	50615456	50708958	+	48.2535	271.922	8.86903	75.3024	11.7291	45.4585	24.7984	0.0173296	Bivalent with poised RNAPII
NM_013838	Trpc6	chr9	8544141	8680741	+	59.7424	150.2	22.4682	26.2344	7.28012	10.3315	23.5584	2.2825e-06	Bivalent with poised RNAPII
NM_020259	Hhip	chr8	82489749	82581907	-	46.5302	124.937	14.7817	23.8053	19.4136	22.0405	27.2782	0.274655	Bivalent with poised RNAPII
NM_021308	Piwil2	chr14	70772286	70828901	-	35.0412	62.9278	9.4603	19.4329	10.1113	13.0865	17.9788	2.89442	Bivalent with poised RNAPII
NM_054041	Antxr1	chr6	87083846	87285769	-	52.2746	94.1621	17.7381	32.0642	20.2225	25.4843	21.0786	0.212232	Bivalent with poised RNAPII
NM_010195	Lgr5	chr10	114887369	115024836	-	42.509	179.138	17.1468	57.327	7.68457	22.7293	22.3185	0.0274918	Bivalent with poised RNAPII
NM_183208	Zmiz1	chr14	26278670	26486233	+	107.421	123.559	11.8254	270.603	18.6047	415.326	30.9979	1.41061	Bivalent with poised RNAPII
NM_174991	Bai1	chr15	74346625	74419894	+	61.4658	200.726	27.7896	118.055	17.3914	29.6169	26.0383	1.35103	Bivalent with poised RNAPII
NM_001004367	Cxxc4	chr3	133899458	133925053	+	51.1257	251.252	11.8254	18.4612	11.7291	22.0405	16.1189	0.0381461	Bivalent with poised RNAPII
NM_001085416	Zfp467	chr6	48386611	48395089	-	63.7636	117.588	28.3809	68.5009	21.0314	364.357	15.499	0.125327	Bivalent with poised RNAPII
NM_001037987	Edil3	chr13	88961076	89462830	+	39.6368	145.607	17.7381	57.8128	18.6047	15.1528	14.879	0.000261312	Bivalent with poised RNAPII
NM_013655	Cxcl12	chr6	117118552	117131386	+	37.9135	163.061	13.5992	118.54	10.5157	22.7293	19.2187	0.174155	Bivalent with poised RNAPII
NM_173184	Rln3	chr8	86566965	86568878	-	52.8491	135.502	23.0595	39.8374	18.2003	11.709	27.8982	1.51452	Bivalent with poised RNAPII
NM_013926	Cbx8	chr11	118899749	118902227	-	63.1891	231.501	18.9206	161.779	16.9869	205.941	21.6986	0.346976	Bivalent with poised RNAPII
NM_178280	Sall3	chr18	81163112	81183317	-	107.421	188.784	14.7817	159.835	15.3691	143.952	26.6582	0.333721	Bivalent with poised RNAPII
NM_013503	Drd5	chr5	38710747	38713549	+	44.2324	189.243	17.7381	106.395	14.5602	15.8416	32.2379	0	Bivalent with poised RNAPII
NM_052977	Adarb2	chr13	8202154	8759554	+	23.5523	120.344	8.86903	17.9754	11.7291	11.0202	9.91934	0	Bivalent with poised RNAPII
NM_001001796	Prrxl1	chr14	33413112	33462432	+	32.7434	224.152	12.4166	37.4083	14.1558	35.127	34.0977	0	Bivalent with poised RNAPII
NM_007417	Adra2a	chr19	54119671	54123472	+	38.4879	155.253	16.5555	111.739	11.3246	17.2191	28.5181	0.0114811	Bivalent with poised RNAPII
NM_011648	Tshr	chr12	92639432	92778949	+	51.7002	131.827	16.5555	30.1209	16.5825	33.7495	16.7389	0.0201072	Bivalent with poised RNAPII
NM_001038846	Rcsd1	chr1	167579075	167638225	-	48.8279	189.243	13.5992	70.4441	21.8403	34.4383	26.0383	0.434402	Bivalent with poised RNAPII
NM_028584	Marveld3	chr8	112476808	112486105	-	68.3591	143.31	20.6944	27.6918	21.8403	23.418	24.1784	0.881924	Bivalent with poised RNAPII
NM_178721	Cadm2	chr16	66655665	67621153	-	111.443	112.076	17.7381	27.206	10.9202	17.9079	26.6582	0.000624399	Bivalent with poised RNAPII
NM_175481	Grik4	chr9	42328494	42752454	-	81.5714	85.8942	19.5119	51.4971	16.5825	24.1068	20.4586	0.113173	Bivalent with poised RNAPII
NM_178920	Mal2	chr15	54402920	54434401	+	43.6579	140.095	10.6428	43.7239	10.5157	18.5967	17.9788	0.899338	Bivalent with poised RNAPII
NM_009219	Sstr4	chr2	148221112	148222500	+	43.0835	135.042	11.2341	34.0075	14.9647	28.9282	17.9788	0	Bivalent with poised RNAPII
NM_024291	Ky	chr9	102408467	102448569	+	36.1901	162.143	13.5992	22.3478	17.7958	13.0865	27.2782	0.0157499	Bivalent with poised RNAPII
NM_134112	Kctd1	chr18	15127193	15309955	-	104.549	208.535	20.1031	40.3232	13.7513	139.819	19.8387	0.324434	Bivalent with poised RNAPII
NM_175631	Cbln4	chr2	171861835	171868966	-	60.8913	143.31	19.5119	53.4404	20.627	16.5304	17.9788	0.175023	Bivalent with poised RNAPII
NM_199239	Sema6d	chr2	124436031	124493506	+	80.4225	163.061	15.9642	25.7485	11.3246	19.2854	26.0383	0.0456522	Bivalent with poised RNAPII
NM_199449	Zhx2	chr15	57526221	57671387	+	82.7203	195.673	18.9206	128.743	10.1113	44.081	31.6179	0.0693293	Bivalent with poised RNAPII
NM_025831	Pxdc1	chr13	34719709	34744550	-	73.5291	194.295	14.1904	171.009	11.7291	19.2854	25.4183	0.816562	Bivalent with poised RNAPII
NM_001025245	Mbp	chr18	82644514	82728095	+	92.4859	171.329	14.1904	47.1247	10.9202	20.663	26.0383	0.572647	Bivalent with poised RNAPII
NM_170684	Cpne7	chr8	125641273	125659085	+	22.9779	242.525	15.9642	52.9546	16.5825	22.7293	21.6986	1.76317	Bivalent with poised RNAPII
NM_145922	Kcnc4	chr3	107241220	107261816	-	103.4	191.54	17.7381	117.569	18.2003	37.8821	24.7984	0.235197	Bivalent with poised RNAPII
NM_029881	Tmem200a	chr10	25710991	25798858	-	52.2746	146.066	18.3293	25.2627	14.1558	21.3517	17.9788	0.0950379	Bivalent with poised RNAPII
NM_011023	Otx1	chr11	21894766	21901654	-	59.7424	235.635	15.9642	207.932	15.7736	407.06	28.5181	0.0787673	Bivalent with poised RNAPII
NM_001025577	Maf	chr8	118227152	118230794	-	50.5513	113.913	15.373	87.4479	19.4136	31.6832	9.29938	0.0960945	Bivalent with poised RNAPII
NM_023624	Lrat	chr3	82696503	82707896	-	23.5523	187.865	17.1468	116.597	20.627	16.5304	15.499	0.0561957	Bivalent with poised RNAPII
NM_011066	Per2	chr1	93312558	93355905	-	50.5513	144.229	26.0158	35.9508	21.0314	15.8416	13.6391	0.19065	Bivalent with poised RNAPII
NM_144557	Myrip	chr9	120213190	120383952	+	50.5513	205.319	12.4166	80.6464	10.9202	23.418	21.6986	0.0906142	Bivalent with poised RNAPII
NM_145608	BC021891	chr8	128434349	128471339	+	51.7002	188.324	15.373	74.8165	13.3469	11.709	24.1784	0.0376319	Bivalent with poised RNAPII
NM_010276	Gem	chr4	11631593	11642140	+	67.2102	160.305	14.7817	28.1777	16.178	19.2854	17.3589	0.281513	Bivalent with poised RNAPII
NM_020026	B3galnt1	chr3	69378107	69402783	-	73.5291	144.229	34.2936	69.9583	35.5917	22.7293	19.8387	2.72146	Bivalent with poised RNAPII
NM_134164	Syt12	chr19	4445907	4477143	-	72.9547	134.124	15.9642	50.0396	16.178	24.1068	22.3185	0.591258	Bivalent with poised RNAPII
NM_029529	Slc35d3	chr10	19567722	19571265	-	60.8913	200.726	16.5555	145.746	14.9647	189.411	20.4586	0.0340516	Bivalent with poised RNAPII
NM_173788	Npr2	chr4	43644806	43664112	+	71.2314	120.803	24.8333	27.6918	19.4136	18.5967	26.6582	1.12453	Bivalent with poised RNAPII
NM_019662	Rrad	chr8	107151965	107155221	-	37.339	114.832	16.5555	48.0963	17.3914	20.663	26.0383	0.361171	Bivalent with poised RNAPII
NM_020260	Arhgap31	chr16	38598455	38713148	-	47.1046	175.004	11.8254	22.8336	11.3246	35.127	19.8387	0.0934083	Bivalent with poised RNAPII
NM_029984	Fam159b	chr13	105635362	105653973	-	40.2113	134.583	21.2857	26.2344	16.9869	16.5304	24.1784	1.19351	Bivalent with poised RNAPII
NM_013751	Hrasls	chr16	29209780	29230616	+	38.4879	200.267	15.373	45.1814	10.9202	13.7753	19.8387	0.0304616	Bivalent with poised RNAPII
NM_017379	Tuba8	chr6	121160787	121176115	+	48.8279	101.971	23.0595	29.1493	16.9869	24.7956	22.3185	0.201584	Bivalent with poised RNAPII
NM_176916	Pld5	chr1	177892436	178205443	-	48.8279	211.291	13.0079	39.3516	9.30237	17.9079	19.8387	0	Bivalent with poised RNAPII
NM_013912	Apln	chrX	45378322	45388029	-	39.0624	123.1	4.73015	33.0359	5.66231	21.3517	11.7792	0	Bivalent with poised RNAPII
NM_021890	Fads3	chr19	10116037	10134161	+	32.169	173.166	35.4761	81.618	35.1872	19.9742	24.7984	0.498491	Bivalent with poised RNAPII
NM_008257	Hmx3	chr7	138686476	138688445	+	44.8068	186.487	8.27776	208.417	12.1335	371.933	30.378	0	Bivalent with poised RNAPII
NM_146386	Myocd	chr11	64990071	65083491	-	29.2968	107.023	8.86903	21.3762	10.1113	15.1528	19.8387	0	Bivalent with poised RNAPII
NM_177082	Sp8	chr12	120084801	120091051	+	77.5503	300.4	18.3293	204.045	17.7958	84.7182	23.5584	0.0579526	Bivalent with poised RNAPII
NM_008092	Gata4	chr14	63817751	63864097	-	95.3581	266.869	13.0079	105.423	8.08902	293.414	21.6986	4.18258	Bivalent with poised RNAPII
NM_011216	Ptpro	chr6	137200819	137413154	+	44.2324	138.717	7.09522	19.9187	8.49347	17.9079	20.4586	0	Bivalent with poised RNAPII
NM_009200	Slc1a6	chr10	78243240	78277570	+	39.6368	144.229	20.1031	18.947	17.3914	15.8416	24.7984	0.372274	Bivalent with poised RNAPII
NM_001033217	Prickle1	chr15	93329544	93426322	-	77.5503	164.439	13.5992	89.877	10.1113	16.5304	12.3992	0.606557	Bivalent with poised RNAPII
NM_013905	Heyl	chr4	122910798	122927113	+	19.5312	161.224	14.7817	39.8374	13.7513	17.9079	27.8982	0.0190855	Bivalent with poised RNAPII
NM_010728	Lox	chr18	52676891	52689362	-	40.7857	155.253	10.0516	26.7202	19.8181	17.9079	20.4586	0	Bivalent with poised RNAPII
NM_029879	Rgs7bp	chr13	105737232	105845010	-	80.4225	176.841	16.5555	72.8732	16.178	40.6372	22.3185	0	Bivalent with poised RNAPII
NM_001001985	Nat8l	chr5	34338632	34348565	+	158.547	143.31	24.242	83.0755	20.627	22.7293	32.8578	0.248166	Bivalent with poised RNAPII
NM_001081401	Adamts3	chr5	90102865	90312359	-	53.998	114.832	10.0516	39.8374	17.7958	29.6169	16.7389	0.0224181	Bivalent with poised RNAPII
NM_175500	Gpc5	chr14	115491436	116924414	+	124.08	313.721	19.5119	44.2098	18.6047	24.7956	26.0383	0	Bivalent with poised RNAPII
NM_020604	Jph1	chr1	16985020	17087970	-	113.166	184.19	21.2857	77.2456	15.7736	19.9742	21.6986	0.484535	Bivalent with poised RNAPII
NM_145829	Nags	chr11	102006826	102010842	+	48.8279	133.664	28.3809	87.4479	19.4136	24.7956	24.7984	0	Bivalent with poised RNAPII
NM_183308	Pon2	chr6	5214623	5248373	-	51.7002	116.669	23.6507	43.2381	17.3914	13.7753	25.4183	3.00896	Bivalent with poised RNAPII
NM_001083936	Pth1r	chr9	110624588	110645114	-	58.0191	232.879	8.27776	67.0434	12.1335	45.4585	17.9788	0	Bivalent with poised RNAPII
NM_027998	Cldn23	chr8	36887762	36889613	-	48.2535	180.975	15.373	52.4687	16.178	19.2854	26.6582	0.300713	Bivalent with poised RNAPII
NM_001081328	Chsy3	chr18	59334993	59570990	+	87.8903	134.583	18.3293	46.1531	17.3914	25.4843	27.2782	0.0898271	Bivalent with poised RNAPII
NM_001044740	Slc7a2	chr8	41947746	42007424	+	41.3601	194.295	5.91268	32.5501	9.70682	13.7753	16.1189	9.39804e-05	Bivalent with poised RNAPII
NM_177431	Adamts20	chr15	94100593	94234781	-	74.1036	124.478	17.1468	43.7239	14.5602	15.8416	24.1784	0	Bivalent with poised RNAPII
NM_021399	Bcl11b	chr12	109148612	109241624	-	46.5302	149.281	15.9642	57.8128	12.1335	261.042	24.1784	2.20232e-06	Bivalent with poised RNAPII
NM_026228	Slc39a8	chr3	135488454	135551536	+	52.2746	164.899	13.0079	89.3912	18.2003	19.2854	17.9788	0.372965	Bivalent with poised RNAPII
NM_172492	Lrtm2	chr6	119265150	119280784	-	39.0624	128.152	15.9642	47.1247	18.2003	23.418	22.9385	4.92853e-06	Bivalent with poised RNAPII
NM_008431	Kcnk4	chr19	7000179	7009005	-	34.4668	163.521	21.2857	65.1001	21.8403	19.9742	24.7984	0.0539118	Bivalent with poised RNAPII
NM_009793	Camk4	chr18	33098694	33355421	+	35.6157	179.138	13.0079	32.0642	14.9647	18.5967	15.499	0.0476928	Bivalent with poised RNAPII
NM_001081235	Mn1	chr5	111847185	111886045	+	77.5503	106.105	18.9206	169.552	16.178	44.7698	25.4183	0.174315	Bivalent with poised RNAPII
NM_007728	Coch	chr12	52694327	52706760	+	106.847	231.501	24.242	28.1777	15.3691	31.6832	19.8387	0	Bivalent with poised RNAPII
NM_026324	Kirrel3	chr9	34296315	34843892	+	32.169	276.974	8.27776	62.671	15.3691	17.9079	25.4183	0	Bivalent with poised RNAPII
NM_172861	Slc7a14	chr3	31101777	31209241	-	31.0201	141.932	18.3293	35.9508	16.178	17.9079	21.6986	0.00478343	Bivalent with poised RNAPII
NM_015771	Lats2	chr14	58308498	58364960	-	91.9114	218.64	19.5119	40.3232	11.3246	72.3204	19.8387	0.670139	Bivalent with poised RNAPII
NM_010229	Flt3	chr5	148142316	148212065	-	33.3179	225.53	12.4166	26.2344	10.9202	67.499	22.9385	0.0478386	Bivalent with poised RNAPII
NM_001103367	Rai2	chrX	158154967	158217426	+	28.1479	104.267	5.91268	19.4329	3.23561	8.26519	5.57963	0.0413901	Bivalent with poised RNAPII
NM_001083119	Ptpru	chr4	131324371	131394193	-	52.2746	143.31	17.1468	131.658	14.9647	22.7293	25.4183	0.000264444	Bivalent with poised RNAPII
NM_028135	Tmem163	chr1	129386918	129574598	-	49.4024	244.362	14.7817	56.8411	14.9647	17.2191	26.0383	0.0178496	Bivalent with poised RNAPII
NM_026788	Mthfd2l	chr5	91360221	91450395	+	47.1046	74.411	15.373	31.5784	16.9869	14.4641	16.7389	0.344014	Bivalent with poised RNAPII
NM_010157	Esr2	chr12	77221405	77278246	-	41.3601	110.239	14.7817	37.4083	15.7736	24.7956	21.0786	6.53076e-06	Bivalent with poised RNAPII
NM_177328	Grm7	chr6	110595591	111517224	+	43.6579	146.066	13.0079	32.5501	11.3246	20.663	17.3589	0	Bivalent with poised RNAPII
NM_025944	Tmem246	chr4	49597377	49610742	-	91.337	107.023	20.6944	35.465	26.6938	8.26519	21.0786	0.416035	Bivalent with poised RNAPII
NM_145136	Myocd	chr11	64990071	65083491	-	29.2968	107.023	8.86903	21.3762	10.1113	15.1528	19.8387	0	Bivalent with poised RNAPII
NM_198959	Hcrtr1	chr4	129807460	129816406	-	59.168	174.085	17.7381	19.9187	12.1335	33.0607	17.3589	0.000130743	Bivalent with poised RNAPII
NM_001004173	Sgpp2	chr1	78306920	78416861	+	35.6157	190.162	10.0516	89.3912	12.538	88.8508	22.9385	0.0761968	Bivalent with poised RNAPII
NM_009849	Entpd2	chr2	25251393	25256843	+	76.9758	156.631	22.4682	32.0642	19.8181	24.1068	29.1381	1.40521	Bivalent with poised RNAPII
NM_172570	Trim47	chr11	115967063	115971549	-	58.5935	219.558	24.8333	61.6994	28.716	24.1068	24.7984	0.529643	Bivalent with poised RNAPII
NM_008516	Lrrn1	chr6	107479719	107520222	+	72.9547	109.32	14.1904	66.0717	12.1335	15.8416	19.2187	0.209277	Bivalent with poised RNAPII
NM_001013753	Pcdh17	chr14	84843369	84936867	+	49.9768	184.65	21.8769	51.9829	14.5602	22.0405	21.0786	0.00443959	Bivalent with poised RNAPII
NM_001081295	Arhgef26	chr3	62142698	62266143	+	94.7837	138.258	26.6071	64.6143	20.2225	26.1731	21.6986	0.33862	Bivalent with poised RNAPII
NM_007929	Emp2	chr16	10281841	10314061	-	52.2746	95.9994	14.7817	27.206	13.7513	25.4843	15.499	5.14276	Bivalent with poised RNAPII
NM_030174	Mctp1	chr13	76522408	77171071	+	51.1257	161.224	10.0516	44.6956	12.538	36.5046	22.3185	0.0505509	Bivalent with poised RNAPII
NM_009306	Syt1	chr10	107934705	108448031	-	38.4879	125.856	14.7817	31.5784	13.3469	17.2191	17.9788	0.00264295	Bivalent with poised RNAPII
NM_001081327	Hs3st2	chr7	128535809	128645282	+	39.0624	188.784	15.373	138.459	15.7736	17.9079	23.5584	0	Bivalent with poised RNAPII
NM_172710	Sel1l3	chr5	53498321	53604691	-	48.8279	197.97	20.1031	62.671	18.2003	15.8416	21.6986	0.354721	Bivalent with poised RNAPII
NM_007592	Car8	chr4	8068639	8166188	-	54.5724	91.8655	18.9206	39.3516	14.5602	11.709	20.4586	0.838373	Bivalent with poised RNAPII
NM_145570	Eva1a	chr6	81991621	82043093	+	102.251	130.908	23.0595	65.1001	21.8403	34.4383	18.5988	2.24296	Bivalent with poised RNAPII
NM_009851	Cd44	chr2	102651299	102741822	-	27.5734	103.808	11.2341	18.947	20.2225	31.6832	16.1189	0.0332073	Bivalent with poised RNAPII
NM_009262	Spock1	chr13	57527451	58009693	-	39.0624	169.032	17.1468	44.6956	9.30237	18.5967	17.3589	0.00050942	Bivalent with poised RNAPII
NM_001003672	Pcdhac2	chr18	37303622	37347311	+	36.7646	227.367	14.7817	105.423	16.9869	67.499	16.7389	0	Bivalent with poised RNAPII
NM_010054	Dlx2	chr2	71381464	71384811	-	35.0412	197.511	23.0595	201.13	24.6715	234.18	24.1784	0	Bivalent with poised RNAPII
NM_018826	Irx5	chr8	94881694	94885355	+	97.6559	132.746	27.7896	188.985	14.9647	175.635	19.2187	0.0375483	Bivalent with poised RNAPII
NM_013823	Kl	chr5	151755181	151796392	+	48.2535	172.707	9.4603	57.8128	14.5602	24.7956	34.0977	0.0252156	Bivalent with poised RNAPII
NM_053107	Gpr45	chr1	43009716	43092294	+	61.4658	137.339	24.8333	26.7202	15.7736	33.7495	26.0383	0	Bivalent with poised RNAPII
NM_013527	Gdf7	chr12	8304723	8308760	-	43.0835	230.123	17.7381	53.9262	18.6047	42.0147	25.4183	0	Bivalent with poised RNAPII
NM_001039494	Tex40	chr19	6996915	6999870	-	55.7213	192.458	23.0595	54.412	21.0314	22.7293	31.6179	5.21107	Bivalent with poised RNAPII
NM_145525	Osbpl6	chr2	76244594	76438704	+	126.378	220.018	23.6507	57.327	24.6715	39.2596	26.6582	2.55204e-05	Bivalent with poised RNAPII
NM_139228	Rhbdl3	chr11	80114413	80169488	+	62.6147	205.319	20.6944	67.5292	16.178	34.4383	21.0786	0.0811343	Bivalent with poised RNAPII
NM_212447	Marveld3	chr8	112471808	112486105	-	68.3591	143.31	20.6944	27.6918	21.8403	23.418	24.1784	0.105961	Bivalent with poised RNAPII
NM_021415	Cacna1h	chr17	25511231	25570728	-	105.698	137.798	17.7381	85.9904	9.30237	37.1933	26.0383	0.000128863	Bivalent with poised RNAPII
NM_011384	Six6	chr12	74040931	74045886	+	53.4235	205.779	21.8769	100.565	13.3469	26.1731	26.0383	0.011007	Bivalent with poised RNAPII
NM_173379	Leprel1	chr16	25960408	26105870	-	63.1891	193.836	13.5992	21.3762	5.66231	17.2191	21.0786	0.262555	Bivalent with poised RNAPII
NM_181395	Pxdn	chr12	30622900	30702523	+	74.678	132.286	13.0079	50.5255	19.4136	13.0865	25.4183	1.52081	Bivalent with poised RNAPII
NM_001081302	Trio	chr15	27660403	27955603	-	175.206	134.124	20.1031	80.6464	23.0537	33.0607	21.6986	1.03161	Bivalent with poised RNAPII
NM_012057	Irf5	chr6	29476624	29487320	+	51.7002	193.836	23.0595	54.8978	26.6938	34.4383	27.2782	0.436469	Bivalent with poised RNAPII
NM_001011518	Olfr94	chr17	37333750	37334911	-	164.292	111.157	20.6944	38.3799	20.2225	22.0405	21.6986	0	Bivalent with poised RNAPII
NM_009741	Bcl2	chr1	108434755	108610867	-	85.5925	139.636	26.6071	52.9546	24.2671	19.2854	23.5584	0.14983	Bivalent with poised RNAPII
NM_008773	P2ry2	chr7	108145085	108160505	-	75.8269	168.114	20.1031	53.4404	12.1335	25.4843	31.6179	0	Bivalent with poised RNAPII
NM_010783	Mdfi	chr17	47952276	47970240	-	90.1881	120.803	23.0595	82.1039	18.6047	22.0405	24.7984	0.577726	Bivalent with poised RNAPII
NM_001039151	Cd44	chr2	102651299	102741822	-	27.5734	103.808	11.2341	18.947	20.2225	31.6832	16.1189	0.0748758	Bivalent with poised RNAPII
NM_009511	Vipr2	chr12	117316195	117384734	+	54.5724	166.276	11.2341	29.6351	12.538	22.7293	22.3185	0	Bivalent with poised RNAPII
NM_010777	Mbp	chr18	82644514	82755029	+	92.4859	171.329	14.1904	47.1247	10.9202	20.663	26.0383	0	Bivalent with poised RNAPII
NM_198409	Rai2	chrX	158155484	158217426	+	28.7223	99.2147	7.09522	23.8053	3.64006	8.95395	6.19959	1.44258e-05	Bivalent with poised RNAPII
NM_173739	Galnt18	chr7	118615174	118923491	-	51.7002	134.124	13.0079	53.4404	8.49347	19.9742	22.3185	0.069653	Bivalent with poised RNAPII
NM_010275	Gdnf	chr15	7761010	7787575	+	47.6791	257.683	12.4166	150.119	9.70682	73.0092	24.7984	0	Bivalent with poised RNAPII
NM_172693	Galnt12	chr4	47104824	47135914	+	41.9346	157.549	15.373	60.7277	12.538	14.4641	17.3589	0.738629	Bivalent with poised RNAPII
NM_001081977	Rnf144a	chr12	26991662	27100121	-	114.889	106.105	24.8333	38.8657	15.7736	18.5967	16.7389	4.02567e-05	Bivalent with poised RNAPII
NM_177769	Elmod1	chr9	53759266	53823108	-	44.8068	163.061	7.09522	20.8903	10.1113	22.7293	21.6986	0.189154	Bivalent with poised RNAPII
NM_001085549	Trabd2b	chr4	114079328	114287703	+	56.2958	141.013	7.09522	46.1531	8.08902	78.5193	18.5988	0	Bivalent with poised RNAPII
NM_013613	Nr4a2	chr2	56959636	56967449	-	83.2947	238.85	35.4761	169.552	28.716	149.462	30.9979	5.89821e-06	Bivalent with poised RNAPII
NM_010437	Hivep2	chr10	13686184	13871184	+	185.546	95.0808	13.5992	133.115	10.9202	321.654	23.5584	0.155498	Bivalent with poised RNAPII
NM_001085415	Zfp467	chr6	48386611	48395089	-	63.7636	117.588	28.3809	68.5009	21.0314	364.357	15.499	1.40639e-05	Bivalent with poised RNAPII
NM_021452	Kcnmb4	chr10	115854923	115910579	-	80.4225	189.243	18.9206	90.8487	19.4136	30.9945	20.4586	0.205868	Bivalent with poised RNAPII
NM_009154	Sema5a	chr15	32174567	32626096	+	112.592	80.3823	15.9642	47.1247	7.28012	13.7753	20.4586	0.0623273	Bivalent with poised RNAPII
NM_010118	Egr2	chr10	67000616	67004936	+	95.3581	205.319	21.8769	216.191	17.3914	50.9687	31.6179	0.0299104	Bivalent with poised RNAPII
NM_025422	Cd302	chr2	60090049	60122475	-	39.6368	158.927	23.0595	44.2098	21.0314	22.7293	22.9385	0	Bivalent with poised RNAPII
NM_008426	Kcnj3	chr2	55289566	55447936	+	37.9135	166.736	16.5555	31.5784	12.9424	15.1528	21.0786	0.0279781	Bivalent with poised RNAPII
NM_009124	Atxn1	chr13	45645124	46060360	-	121.783	97.8367	16.5555	109.31	16.5825	169.436	16.1189	2.33059e-05	Bivalent with poised RNAPII
NM_011510	Abcc8	chr7	53359892	53435403	-	40.7857	124.478	14.1904	35.465	9.70682	26.1731	17.3589	0.487141	Bivalent with poised RNAPII
NM_027834	9130008F23Rik	chr17	41012430	41017507	-	90.1881	91.8655	15.9642	19.9187	14.9647	11.709	21.6986	0.443418	Bivalent with poised RNAPII
NM_009236	Sox18	chr2	181404541	181406345	-	66.6358	230.123	27.1983	132.143	25.4804	29.6169	35.3377	0.145814	Bivalent with poised RNAPII
NM_020605	Jph3	chr8	124254458	124314983	+	83.2947	200.726	24.242	53.9262	21.8403	22.0405	9.29938	0.234458	Bivalent with poised RNAPII
NM_001081172	Frmpd1	chr4	45197777	45298808	+	75.8269	144.229	19.5119	62.1852	14.1558	28.9282	22.9385	0.690162	Bivalent with poised RNAPII
NM_001039472	Kif21b	chr1	138027977	138074591	+	136.718	118.047	17.1468	27.6918	19.0092	18.5967	27.2782	0.940654	Bivalent with poised RNAPII
NM_178631	Ralyl	chr3	13471654	14182287	+	43.6579	177.76	11.2341	48.0963	11.7291	11.0202	20.4586	0	Bivalent with poised RNAPII
NM_001013390	Scn4b	chr9	44947124	44962144	+	33.3179	234.257	15.373	45.1814	17.7958	28.9282	22.9385	0.0102227	Bivalent with poised RNAPII
NM_178644	Oaf	chr9	43029360	43047899	-	35.0412	173.626	18.9206	74.3307	17.3914	22.7293	19.2187	0.340254	Bivalent with poised RNAPII
NM_010181	Fbn2	chr18	58168276	58369580	-	42.509	151.578	20.6944	51.4971	22.6493	42.0147	21.0786	0.0643225	Bivalent with poised RNAPII
NM_146072	Grik1	chr16	87896141	88290503	-	35.0412	199.807	13.5992	39.3516	9.70682	21.3517	12.3992	0	Bivalent with poised RNAPII
NM_198612	Gxylt2	chr6	100654727	100755075	+	71.2314	184.65	17.1468	83.0755	12.9424	25.4843	21.0786	0	Bivalent with poised RNAPII
NM_030889	Sorcs2	chr5	36359829	36740788	-	44.2324	119.425	15.373	83.0755	23.8626	30.3057	21.0786	0.456696	Bivalent with poised RNAPII
NM_026408	Sncaip	chr18	52927464	53075585	+	52.8491	148.822	15.373	27.6918	11.3246	37.8821	14.2591	0.000261914	Bivalent with poised RNAPII
NM_009307	Syt2	chr1	136543257	136645994	+	59.168	183.731	17.1468	34.9792	21.0314	24.1068	22.9385	0	Bivalent with poised RNAPII
NM_011915	Wif1	chr10	120471059	120537698	+	60.8913	121.262	17.7381	35.9508	21.0314	27.5506	15.499	0.020256	Bivalent with poised RNAPII
NM_009630	Adora2a	chr10	74779687	74797533	+	48.8279	135.961	33.7023	79.6748	33.9739	26.1731	19.2187	0	Bivalent with poised RNAPII
NM_007666	Cdh6	chr15	12963954	13103394	-	48.2535	259.061	16.5555	44.6956	18.6047	33.7495	24.1784	0.0170048	Bivalent with poised RNAPII
NM_080440	Slc8a3	chr12	82298901	82434167	-	59.168	204.401	13.0079	57.8128	17.7958	28.9282	15.499	0	Bivalent with poised RNAPII
NM_009800	Car11	chr7	52955336	52960031	+	58.5935	144.688	24.242	57.8128	34.3783	27.5506	16.1189	2.36999	Bivalent with poised RNAPII
NM_010052	Dlk1	chr12	110691664	110701546	+	41.3601	163.521	10.6428	60.7277	11.7291	16.5304	28.5181	0.219598	Bivalent with poised RNAPII
NM_138650	Dgkg	chr16	22466641	22657304	-	69.508	161.683	15.373	30.1209	10.9202	15.8416	24.1784	0.0389589	Bivalent with poised RNAPII
NM_024469	Bhlhe41	chr6	145806762	145813940	-	83.8692	221.855	24.242	153.52	19.0092	27.5506	21.0786	0.641936	Bivalent with poised RNAPII
NM_001001881	2510009E07Rik	chr16	21649117	21694738	-	86.167	244.821	21.2857	155.463	16.178	64.0552	26.0383	0.0999273	Bivalent with poised RNAPII
NM_001085417	Zfp467	chr6	48377690	48395824	-	60.8913	122.64	23.0595	69.9583	14.9647	356.781	13.6391	0	Bivalent with poised RNAPII
NM_001025567	Dmbx1	chr4	115587723	115612531	-	32.7434	269.166	18.3293	154.491	22.6493	118.468	24.7984	0.0317043	Bivalent with poised RNAPII
NM_001081672	Fam43b	chr4	137950006	137952373	-	35.6157	196.592	27.7896	185.584	19.0092	32.372	29.758	0.114518	Bivalent with poised RNAPII
NM_021704	Cxcl12	chr6	117118552	117125087	+	37.9135	163.061	13.5992	118.54	10.5157	22.7293	19.2187	0.159724	Bivalent with poised RNAPII
NM_016711	Tmod2	chr9	75413428	75459132	-	75.2525	179.138	28.3809	66.5576	24.2671	19.9742	22.9385	0.268531	Bivalent with poised RNAPII
NM_016708	Npy5r	chr8	69203863	69211993	-	33.8923	110.698	7.09522	31.0926	12.9424	9.64272	19.2187	0	Bivalent with poised RNAPII
NM_145684	Alox12e	chr11	70129114	70136020	-	39.0624	99.674	21.8769	36.4366	19.8181	24.7956	21.0786	0.0196118	Bivalent with poised RNAPII
NM_145423	Slc5a8	chr10	88348736	88392260	+	48.2535	159.387	13.0079	31.5784	17.3914	17.9079	19.2187	0.0161123	Bivalent with poised RNAPII
NM_010445	Hmx1	chr5	35731765	35735521	+	36.7646	262.276	19.5119	143.317	16.178	83.3406	27.2782	0.0316419	Bivalent with poised RNAPII
NM_175535	Arhgap20	chr9	51573456	51661164	+	107.996	148.822	18.3293	68.9867	15.7736	25.4843	12.3992	0.0134111	Bivalent with poised RNAPII
NM_013628	Pcsk1	chr13	75227434	75269946	+	64.338	73.4924	7.68649	53.4404	19.8181	18.5967	23.5584	0.553575	Bivalent with poised RNAPII
NM_008498	Lhx1	chr11	84332880	84339036	-	35.6157	269.625	11.2341	204.045	19.0092	398.107	41.5373	0	Bivalent with poised RNAPII
NM_001037221	Samd4	chr14	47502639	47725492	+	74.1036	146.525	11.2341	92.3061	15.3691	107.447	22.9385	0	Bivalent with poised RNAPII
NM_011395	Slc22a3	chr17	12612839	12700570	-	44.8068	140.554	13.0079	21.862	14.9647	19.9742	22.9385	0.0125328	Bivalent with poised RNAPII
NM_172815	Rspo2	chr15	42852340	43002364	-	33.3179	192.458	12.4166	34.4933	12.9424	11.709	24.7984	0	Bivalent with poised RNAPII
NM_001093750	Ptchd1	chrX	152004278	152057870	-	63.1891	70.7364	11.2341	99.5934	6.47121	33.7495	11.1593	0.17745	Bivalent with poised RNAPII
NM_053083	Loxl4	chr19	42666768	42687296	-	27.5734	95.5401	13.5992	83.0755	12.538	21.3517	27.2782	0.206687	Bivalent with poised RNAPII
NM_008832	Phka1	chrX	99709313	99839585	-	45.3813	59.7126	11.8254	16.0321	13.3469	14.4641	16.1189	0.235097	Bivalent with poised RNAPII
NM_138750	Prom2	chr2	127352688	127367153	-	43.0835	94.1621	11.8254	45.1814	11.7291	33.0607	29.758	0.569358	Bivalent with poised RNAPII
NM_008032	Aff2	chrX	66613505	67121212	+	31.5946	99.674	5.32142	33.0359	6.47121	5.51012	5.57963	0.00964524	Bivalent with poised RNAPII
NM_021544	Scn5a	chr9	119392525	119488134	-	40.7857	243.443	18.9206	101.051	12.9424	35.8158	27.2782	1.27936e-05	Bivalent with poised RNAPII
NM_177838	Fam163a	chr1	157923085	158135156	-	37.339	223.692	11.8254	37.8941	14.9647	41.3259	21.0786	0.0783857	Bivalent with poised RNAPII
NM_013681	Syn2	chr6	115084919	115226577	+	59.168	116.21	16.5555	29.6351	19.4136	17.9079	20.4586	0.0226042	Bivalent with poised RNAPII
NM_199238	Sema6d	chr2	124436031	124493506	+	80.4225	163.061	15.9642	25.7485	11.3246	19.2854	26.0383	0	Bivalent with poised RNAPII
NM_172124	B3gat2	chr1	23768764	23854697	+	97.6559	170.41	15.9642	81.618	12.538	25.4843	24.7984	6.24828	Bivalent with poised RNAPII
NM_207583	Fam5b	chr1	160175399	160286391	-	33.8923	133.664	10.0516	42.2665	16.5825	16.5304	17.3589	0.0529884	Bivalent with poised RNAPII
NM_015820	Hs6st3	chr14	119537486	120269037	+	174.057	325.663	16.5555	108.824	14.5602	28.9282	29.758	0.0522418	Bivalent with poised RNAPII
NM_029005	Mlkl	chr8	113835699	113861803	-	26.999	69.3584	14.7817	31.0926	17.3914	27.5506	17.9788	0.220392	Bivalent with poised RNAPII
NM_015819	Hs6st2	chrX	48740388	49033654	-	60.3169	121.262	5.91268	61.2135	9.30237	46.1473	21.0786	0.753823	Bivalent with poised RNAPII
NM_033567	Cecr6	chr6	120438956	120443825	-	50.5513	172.707	18.9206	53.9262	20.2225	26.8619	17.3589	0.00885366	Bivalent with poised RNAPII
NM_001012517	Fut10	chr8	32297849	32371955	+	67.7847	86.8129	13.0079	66.5576	20.627	17.2191	19.8387	0.0413998	Bivalent with poised RNAPII
NM_020578	Ehd3	chr17	74154180	74181433	+	80.4225	77.167	11.2341	24.2911	13.3469	17.2191	29.758	0.418467	Bivalent with poised RNAPII
NM_001033223	Lin7a	chr10	106708886	106862199	+	51.1257	188.324	7.68649	52.4687	8.49347	25.4843	16.1189	0.00717359	Bivalent with poised RNAPII
NM_033144	44082	chr11	53333237	53357598	+	124.655	98.7554	22.4682	48.0963	22.6493	26.8619	17.3589	0.889259	Bivalent with poised RNAPII
NM_145744	Dusp15	chr2	152770668	152777141	-	48.2535	165.817	13.0079	23.8053	16.178	22.7293	22.3185	0.123039	Bivalent with poised RNAPII
NM_008250	Hlx	chr1	186551023	186556372	-	70.6569	229.204	14.1904	124.856	15.3691	143.952	19.8387	0.0424908	Bivalent with poised RNAPII
NM_009197	Slc16a2	chrX	100892752	101017327	-	32.169	89.1095	11.8254	74.8165	10.5157	23.418	11.1593	0.282086	Bivalent with poised RNAPII
NM_007461	Apba2	chr7	71646591	71898762	+	77.5503	154.334	11.2341	42.7523	10.1113	16.5304	17.9788	0.261656	Bivalent with poised RNAPII
NM_033325	Loxl2	chr14	70009282	70095641	+	109.145	118.966	11.2341	26.2344	11.7291	33.7495	33.4778	2.28264	Bivalent with poised RNAPII
NM_008553	Ascl1	chr10	86953785	86956405	-	71.8058	203.023	13.5992	138.459	14.1558	121.223	24.1784	0	Bivalent with poised RNAPII
NM_172702	Serinc2	chr4	129930740	129952830	-	64.338	155.712	13.5992	61.6994	13.3469	31.6832	17.9788	1.60445	Bivalent with poised RNAPII
NM_010724	Psmb8	chr17	34335139	34338399	+	23.5523	144.688	15.9642	20.8903	11.3246	22.7293	22.9385	0.404759	Bivalent with poised RNAPII
NM_027452	Lrfn2	chr17	49071906	49236915	+	52.8491	133.205	15.373	61.2135	12.9424	17.9079	21.0786	0	Bivalent with poised RNAPII
NM_029004	Rasgef1c	chr11	49715336	49793725	+	54.5724	200.726	26.0158	8.74479	13.3469	21.3517	21.6986	0.0607084	Bivalent with poised RNAPII
NM_207624	Ace	chr11	105829258	105851278	+	64.338	124.937	15.373	40.809	9.70682	21.3517	16.1189	0.162866	Bivalent with poised RNAPII
NM_007585	Anxa2	chr9	69301489	69339592	+	70.0825	73.4924	24.242	27.206	23.0537	36.5046	24.7984	24.2237	Bivalent with poised RNAPII
NM_010280	Gfra3	chr18	34849556	34880041	-	36.1901	124.018	13.0079	17.4896	10.1113	23.418	22.3185	0.161597	Bivalent with poised RNAPII
NM_172152	Slc24a4	chr12	103367628	103504959	+	55.1469	245.281	11.2341	68.015	15.3691	38.5709	29.1381	0.0218637	Bivalent with poised RNAPII
NM_026235	Larp6	chr9	60560927	60586608	+	37.9135	130.908	18.3293	56.8411	22.2448	15.8416	24.1784	0.0196211	Bivalent with poised RNAPII
NM_019677	Plcb1	chr2	134611899	135300994	+	68.9336	119.425	11.2341	13.1172	10.9202	33.0607	39.6774	2.18667e-05	Bivalent with poised RNAPII
NM_011530	Tap2	chr17	34341423	34353266	+	48.2535	84.5162	24.8333	32.0642	22.2448	26.8619	11.1593	0.650167	Bivalent with poised RNAPII
NM_011141	Pou3f1	chr4	124334888	124337899	+	111.443	133.205	24.242	141.374	20.627	68.8766	21.0786	0.603121	Bivalent with poised RNAPII
NM_201600	Myo5b	chr18	74602272	74931131	+	103.975	192.917	18.3293	53.4404	14.9647	26.1731	19.8387	0.2308	Bivalent with poised RNAPII
NM_207707	Esr2	chr12	77221405	77278246	-	41.3601	110.239	14.7817	37.4083	15.7736	24.7956	21.0786	0	Bivalent with poised RNAPII
NM_023663	Ripk4	chr16	97963548	97985362	-	78.1247	220.477	21.2857	85.9904	19.0092	19.2854	32.8578	1.98705	Bivalent with poised RNAPII
NM_178110	Trim62	chr4	128561383	128588570	+	58.5935	148.363	15.373	40.809	20.627	16.5304	17.9788	0.427553	Bivalent with poised RNAPII
NM_146146	Lepr	chr4	101390011	101487959	+	49.4024	180.975	19.5119	38.3799	14.5602	21.3517	26.0383	0	Bivalent with poised RNAPII
NM_011763	Zfp9	chr6	118411967	118429291	-	33.3179	194.755	13.5992	42.2665	19.8181	24.7956	23.5584	0.433315	Bivalent with poised RNAPII
NM_001033354	Iqsec3	chr6	121322950	121423696	-	49.9768	160.765	16.5555	25.7485	14.1558	39.9484	16.1189	3.92041e-06	Bivalent with poised RNAPII
NM_028113	Amer2	chr14	60997122	60999840	+	24.7012	197.051	7.68649	30.1209	5.25786	17.9079	25.4183	5.84689e-07	Bivalent with poised RNAPII
NM_008591	Met	chr6	17413956	17523980	+	78.6992	165.817	14.7817	19.4329	19.0092	22.7293	9.29938	0.358744	Bivalent with poised RNAPII
NM_144828	Ppp1r1b	chr11	98210051	98219109	+	71.2314	229.664	22.4682	77.2456	16.5825	43.3922	20.4586	0.366945	Bivalent with poised RNAPII
NM_009390	Tll1	chr8	66493566	66684790	-	43.6579	235.635	21.2857	82.1039	22.2448	24.7956	15.499	0.0349725	Bivalent with poised RNAPII
NM_026743	Tspan11	chr6	127837639	127903049	+	44.8068	105.186	14.7817	35.465	10.5157	17.9079	14.879	0	Bivalent with poised RNAPII
NM_009880	Cdx1	chr18	61178515	61195853	-	26.4245	185.109	17.7381	82.1039	15.3691	30.9945	19.8387	0.560588	Bivalent with poised RNAPII
NM_007733	Col19a1	chr1	24264521	24594276	-	36.1901	216.343	6.50395	20.4045	9.30237	16.5304	19.2187	0	Bivalent with poised RNAPII
NM_001083628	Greb1l	chr18	10325176	10562939	+	78.6992	171.788	17.7381	35.465	19.4136	32.372	21.6986	0.588194	Bivalent with poised RNAPII
NM_207109	Astn2	chr4	65041836	66065517	-	45.9557	146.066	8.86903	38.3799	14.1558	24.1068	17.9788	0	Bivalent with poised RNAPII
NM_133235	Khdrbs2	chr1	32229650	32714583	+	39.6368	134.583	13.0079	31.5784	11.3246	13.7753	15.499	0	Bivalent with poised RNAPII
NM_021344	Tesc	chr5	118477832	118511879	+	76.4014	214.047	14.1904	178.782	14.1558	50.9687	24.7984	2.45738	Bivalent with poised RNAPII
NM_001015046	Rap1gap2	chr11	74196984	74403660	-	54.5724	154.334	23.0595	80.6464	20.627	22.7293	27.8982	0.905198	Bivalent with poised RNAPII
NM_031199	Tgfa	chr6	86145244	86225443	+	95.3581	110.239	21.2857	23.8053	21.0314	23.418	17.3589	0.25652	Bivalent with poised RNAPII
NM_016791	Nfatc1	chr18	80844173	80904912	-	38.4879	257.223	9.4603	87.9337	10.5157	37.8821	27.8982	0.0632616	Bivalent with poised RNAPII
NM_001080381	Fam65b	chr13	24730516	24797870	+	71.8058	192.917	8.27776	71.9016	12.1335	16.5304	26.0383	0.0431307	Bivalent with poised RNAPII
NM_011633	Traf5	chr1	193821083	193916480	-	62.0402	117.588	19.5119	54.412	12.1335	28.2394	24.1784	0.259889	Bivalent with poised RNAPII
NM_181748	Ffar4	chr19	38171568	38188753	+	23.5523	152.956	17.7381	58.7844	21.8403	40.6372	18.5988	0.0346976	Bivalent with poised RNAPII
NM_016780	Itgb3	chr11	104469313	104531785	+	60.3169	175.463	23.0595	39.8374	23.0537	31.6832	23.5584	0.837213	Bivalent with poised RNAPII
NM_013553	Hoxc4	chr15	102864825	102867283	+	57.4446	196.133	11.2341	59.7561	11.7291	76.453	36.5776	0.417635	Bivalent with poised RNAPII
NM_199024	Nol4	chr18	22851655	23200154	-	37.9135	144.229	18.3293	173.924	8.89792	28.2394	19.2187	0	Bivalent with poised RNAPII
NM_011255	Rbp4	chr19	38191109	38199301	-	31.0201	204.401	15.9642	124.856	22.2448	19.9742	20.4586	1.19218	Bivalent with poised RNAPII
NM_026183	Slc47a1	chr11	61156901	61191577	-	33.3179	173.166	13.0079	32.5501	14.5602	13.7753	24.7984	2.73551	Bivalent with poised RNAPII
NM_009597	Asic1	chr15	99501148	99531559	+	68.9336	155.253	21.8769	44.6956	19.0092	23.418	21.6986	1.26444	Bivalent with poised RNAPII
NM_133897	Lrrc8c	chr5	105948489	106037973	+	118.91	130.908	13.0079	58.7844	12.9424	24.1068	20.4586	0.943768	Bivalent with poised RNAPII
NM_018797	Plxnc1	chr10	94253611	94407212	-	145.335	159.387	15.373	145.261	16.9869	64.744	24.1784	0.8032	Bivalent with poised RNAPII
NM_001012765	Adcy5	chr16	35155721	35304635	+	80.9969	181.894	18.3293	131.658	16.5825	57.8563	33.4778	0.161606	Bivalent with poised RNAPII
NM_026405	Rab32	chr10	10264836	10278005	-	41.9346	71.1957	8.86903	39.3516	11.3246	14.4641	9.91934	0.334686	Bivalent with poised RNAPII
NM_182636	Vwa5b2	chr16	20589654	20598540	+	54.5724	175.463	8.27776	84.533	10.9202	27.5506	28.5181	0	Bivalent with poised RNAPII
NM_009751	Bfsp1	chr2	143652263	143688909	-	53.998	110.698	17.1468	35.9508	16.178	25.4843	37.8175	0.171076	Bivalent with poised RNAPII
NM_011105	Pkdrej	chr15	85645105	85652163	-	40.7857	136.42	18.3293	51.0113	12.1335	17.9079	17.3589	0.0421874	Bivalent with poised RNAPII
NM_008154	Gpr3	chr4	132765254	132768451	-	106.847	78.545	11.8254	28.1777	14.5602	15.1528	19.8387	0.319338	Bivalent with poised RNAPII
NM_172399	Ndnf	chr6	65621604	65656924	+	39.6368	197.051	17.1468	113.196	16.5825	24.1068	17.9788	0.0184382	Bivalent with poised RNAPII
NM_007731	Col13a1	chr10	61301245	61441856	-	92.4859	206.697	15.373	48.0963	17.7958	35.127	25.4183	0.536043	Bivalent with poised RNAPII
NM_013665	Shox2	chr3	66777190	66785693	-	47.1046	247.577	11.2341	72.3874	10.5157	63.3664	18.5988	0	Bivalent with poised RNAPII
NM_001082483	Efr3b	chr12	3962553	4038915	-	105.124	122.64	23.0595	45.1814	12.1335	25.4843	21.6986	1.11358	Bivalent with poised RNAPII
NM_008066	Gabra2	chr5	71352295	71487088	-	50.5513	167.195	18.3293	25.2627	14.1558	16.5304	15.499	0.0188684	Bivalent with poised RNAPII
NM_152947	Ovol2	chr2	144130911	144157098	-	156.824	134.124	21.8769	112.225	28.716	39.2596	24.1784	1.88341	Bivalent with poised RNAPII
NM_178887	Fibcd1	chr2	31668809	31701525	-	26.4245	187.406	8.27776	48.5822	12.9424	35.127	17.3589	0.0181667	Bivalent with poised RNAPII
NM_053242	Foxp2	chr6	14851348	15391977	+	53.4235	132.746	15.9642	74.3307	9.30237	30.9945	16.7389	0.00630064	Bivalent with poised RNAPII
NM_001083316	Pdgfra	chr5	75552190	75594229	+	71.8058	138.258	15.373	98.6218	15.3691	49.5911	16.7389	2.30474	Bivalent with poised RNAPII
NM_146191	Lrrk1	chr7	73403632	73533227	-	41.3601	134.583	8.86903	25.2627	9.70682	16.5304	15.499	0.376046	Bivalent with poised RNAPII
NM_052994	Spock2	chr10	59569004	59596661	+	65.4869	125.856	41.9801	67.0434	44.8941	20.663	27.8982	1.50236	Bivalent with poised RNAPII
NM_025806	Plbd1	chr6	136560591	136610414	-	56.8702	134.583	13.0079	61.2135	17.3914	17.9079	21.0786	2.3553	Bivalent with poised RNAPII
NM_010132	Emx2	chr19	59533179	59539847	+	33.8923	198.889	12.4166	145.746	11.3246	164.615	13.6391	0.0689843	Bivalent with poised RNAPII
NM_133229	Ripply3	chr16	94550028	94558542	+	60.8913	191.54	13.5992	27.6918	20.627	53.7237	24.7984	0.90309	Bivalent with poised RNAPII
NM_172805	Kcnh5	chr12	75998203	76278319	-	53.998	173.166	13.0079	30.6068	12.1335	23.418	21.0786	0	Bivalent with poised RNAPII
NM_024189	Yaf2	chr15	93114263	93167366	-	121.783	210.831	23.0595	42.2665	15.7736	17.9079	9.29938	2.72653	Bivalent with poised RNAPII
NM_013669	Snap91	chr9	86659229	86775284	-	106.847	175.463	13.0079	74.3307	18.2003	37.1933	26.6582	0	Bivalent with poised RNAPII
NM_001001883	Hecw2	chr1	53863717	54251878	-	68.3591	215.884	11.2341	18.4612	11.7291	17.9079	22.3185	0.293604	Bivalent with poised RNAPII
NM_018763	Chst2	chr9	95301344	95307689	-	111.443	191.08	20.6944	171.495	18.6047	159.794	25.4183	0.054728	Bivalent with poised RNAPII
NM_198037	Cachd1	chr4	100449283	100676353	+	142.463	121.262	17.7381	78.7031	9.70682	194.921	26.0383	0.242906	Bivalent with poised RNAPII
NM_147221	Glis1	chr4	107107323	107307664	+	71.8058	224.611	16.5555	90.8487	16.9869	29.6169	22.3185	0.122343	Bivalent with poised RNAPII
NM_001001804	Ephx4	chr5	107832531	107859050	+	87.3159	128.612	15.373	32.0642	11.7291	22.7293	29.758	0.66528	Bivalent with poised RNAPII
NM_001033409	Lgr6	chr1	136882929	137001853	-	42.509	136.42	24.242	94.2494	22.6493	26.1731	14.2591	0.169099	Bivalent with poised RNAPII
NM_027990	Lypd6b	chr2	49643205	49804366	+	55.1469	167.654	7.09522	37.4083	15.7736	11.0202	18.5988	0.158702	Bivalent with poised RNAPII
NM_054049	Osr2	chr15	35225866	35233060	+	55.7213	345.414	13.0079	185.584	14.1558	172.88	29.1381	0.137014	Bivalent with poised RNAPII
NM_001033365	Mroh5	chr15	73617365	73670101	-	49.4024	184.65	12.4166	54.8978	16.5825	22.7293	14.879	0	Bivalent with poised RNAPII
NM_198960	Tfap2e	chr4	126393246	126413513	-	44.2324	220.477	11.8254	68.5009	14.5602	19.2854	21.0786	0.0863131	Bivalent with poised RNAPII
NM_134131	Tnfaip8	chr18	50212935	50252883	+	49.9768	99.2147	23.0595	47.1247	26.2893	42.0147	25.4183	0	Bivalent with poised RNAPII
NM_176930	Nrcam	chr12	45429871	45702833	+	72.9547	136.88	24.8333	136.516	23.4582	29.6169	19.8387	7.35986e-06	Bivalent with poised RNAPII
NM_172706	9330182L06Rik	chr5	9266192	9480717	+	74.1036	146.066	17.1468	27.6918	20.627	14.4641	16.1189	0.13073	Bivalent with poised RNAPII
NM_008814	Pdx1	chr5	148081706	148086725	+	30.4457	187.406	15.373	58.2986	14.1558	102.626	20.4586	0	Bivalent with poised RNAPII
NM_011866	Pde10a	chr17	8994609	9179513	+	63.7636	173.166	15.373	205.988	10.5157	192.854	15.499	0.0658174	Bivalent with poised RNAPII
NM_010317	Gng4	chr13	13876805	13920162	+	54.5724	172.248	18.9206	33.5217	13.7513	32.372	23.5584	1.40344e-06	Bivalent with poised RNAPII
NM_013800	Barx2	chr9	31653628	31720870	-	88.4648	248.955	20.1031	167.608	17.7958	110.202	24.7984	0	Bivalent with poised RNAPII
NM_001003911	Adamts7	chr9	90057815	90094940	+	113.166	139.176	23.0595	64.1285	22.2448	66.1215	21.0786	0.385567	Bivalent with poised RNAPII
NM_172633	Cbln2	chr18	86882439	86887675	+	31.5946	180.516	8.86903	50.0396	10.5157	23.418	15.499	1.77498e-05	Bivalent with poised RNAPII
NM_133643	Edaradd	chr13	12563475	12612717	-	22.4034	173.166	13.0079	46.6389	19.4136	19.2854	21.6986	0.0470667	Bivalent with poised RNAPII
NM_001079883	Bcl11b	chr12	109148612	109241624	-	46.5302	149.281	15.9642	57.8128	12.1335	261.042	24.1784	0.0709082	Bivalent with poised RNAPII
NM_172271	Slc6a17	chr3	107270465	107320936	-	48.8279	215.884	9.4603	24.2911	12.1335	28.9282	21.6986	0.015943	Bivalent with poised RNAPII
NM_007762	Crhr1	chr11	103994195	104036832	+	40.7857	242.525	12.4166	83.5613	13.7513	39.2596	37.1975	0	Bivalent with poised RNAPII
NM_008855	Prkcb	chr7	129432638	129777915	+	147.633	148.822	24.242	35.9508	21.8403	29.6169	24.1784	0.445426	Bivalent with poised RNAPII
NM_001007460	Zdhhc23	chr16	43969258	43979163	-	74.1036	187.865	23.6507	60.2419	22.2448	24.7956	23.5584	0.11522	Bivalent with poised RNAPII
NM_148951	Gipc3	chr10	80800506	80806011	-	36.1901	99.674	36.6586	40.3232	28.3116	22.0405	15.499	0.050277	Bivalent with poised RNAPII
NM_145144	Aif1l	chr2	31805822	31828962	+	76.9758	136.88	14.7817	52.4687	19.0092	24.1068	22.9385	3.39462	Bivalent with poised RNAPII
NM_001001488	Atp8b1	chr18	64688632	64820654	-	76.9758	209.913	23.0595	107.852	15.3691	65.4327	16.7389	0.105982	Bivalent with poised RNAPII
NM_178081	Mfsd6	chr1	52716829	52784162	-	89.6136	148.822	15.9642	17.4896	16.178	22.0405	22.3185	0	Bivalent with poised RNAPII
NM_001033525	Kcnk6	chr7	30006946	30017541	-	61.4658	148.822	27.7896	66.0717	19.8181	18.5967	23.5584	0.818541	Bivalent with poised RNAPII
NM_009794	Capn2	chr1	184397389	184447614	-	131.548	96.9181	20.6944	51.9829	20.627	28.9282	28.5181	7.84032	Bivalent with poised RNAPII
NM_016967	Olig2	chr16	91225794	91228922	+	192.44	196.133	14.7817	254.085	13.3469	95.7384	31.6179	2.55141	Bivalent with poised RNAPII
NM_177756	Colgalt2	chr1	154246996	154357825	+	59.7424	159.846	12.4166	22.8336	14.9647	28.2394	19.2187	0.117936	Bivalent with poised RNAPII
NM_198649	Ablim3	chr18	61959046	62071478	-	94.2092	87.7315	15.9642	49.5538	18.6047	22.7293	19.8387	0	Bivalent with poised RNAPII
NM_172690	N28178	chr4	42930122	42954479	+	71.8058	241.147	10.0516	18.4612	11.3246	19.9742	21.0786	0	Bivalent with poised RNAPII
NM_027627	Eva1c	chr16	90831103	90905130	+	76.4014	156.171	15.373	102.994	13.7513	42.0147	17.9788	0.276094	Bivalent with poised RNAPII
NM_007419	Adrb1	chr19	56796861	56799352	+	63.7636	148.363	15.9642	230.765	13.3469	27.5506	29.1381	0.180523	Bivalent with poised RNAPII
NM_145831	Dmrt2	chr19	25746900	25753481	+	55.1469	289.376	10.6428	101.537	11.7291	176.324	26.0383	0.0387091	Bivalent with poised RNAPII
NM_175473	Fras1	chr5	96802973	97213747	+	48.2535	135.961	21.2857	59.7561	11.3246	46.8361	22.3185	0.0448946	Bivalent with poised RNAPII
NM_178793	Ccbe1	chr18	66216509	66451492	-	52.2746	214.506	19.5119	75.3024	14.5602	59.9226	19.2187	0.067126	Bivalent with poised RNAPII
NM_013519	Foxc2	chr8	123640070	123642794	+	36.1901	202.563	14.1904	199.673	14.1558	230.048	35.3377	0.0491532	Bivalent with poised RNAPII
NM_008781	Pax3	chr1	78097841	78193711	-	33.3179	270.084	13.0079	111.739	15.3691	290.659	27.2782	5.46195e-07	Bivalent with poised RNAPII
NM_133442	Grip1	chr10	118891089	119514217	+	62.0402	123.559	8.27776	67.5292	10.5157	36.5046	17.3589	0	Bivalent with poised RNAPII
NM_007709	Cited1	chrX	99442716	99447182	-	45.9557	107.483	11.8254	33.0359	5.66231	27.5506	11.1593	0.183986	Bivalent with poised RNAPII
NM_174853	Disc1	chr8	127578094	127785051	+	47.1046	222.774	17.1468	99.5934	16.5825	26.1731	27.8982	0.0187287	Bivalent with poised RNAPII
NM_023116	Cacnb2	chr2	14525932	14909535	+	24.7012	147.444	9.4603	41.2948	10.1113	35.8158	16.1189	0	Bivalent with poised RNAPII
NM_022017	Trpv4	chr5	115072162	115108430	-	29.8712	121.262	23.0595	25.2627	19.4136	24.1068	21.0786	0.888182	Bivalent with poised RNAPII
NM_007938	Epha6	chr16	59653308	60605357	-	31.0201	191.999	12.4166	61.6994	14.1558	21.3517	14.2591	0.0103017	Bivalent with poised RNAPII
NM_021439	Chst11	chr10	82448241	82658636	+	95.9326	244.821	17.7381	75.7882	17.3914	27.5506	32.2379	0.202053	Bivalent with poised RNAPII
NM_178756	E130309F12Rik	chr4	49072333	49353133	+	37.339	158.927	19.5119	41.7807	16.5825	17.2191	20.4586	0.0116069	Bivalent with poised RNAPII
NM_033590	Pcdhga7	chr18	37874487	38001526	+	72.9547	182.353	36.6586	53.4404	38.4228	19.2854	20.4586	0.105785	Bivalent with poised RNAPII
NM_010090	Dusp2	chr2	127161894	127164113	+	58.5935	140.095	21.8769	50.5255	15.3691	28.2394	42.1572	0.175101	Bivalent with poised RNAPII
NM_009508	Slc32a1	chr2	158436493	158441483	+	33.3179	240.688	12.4166	98.6218	14.1558	28.9282	20.4586	0.142871	Bivalent with poised RNAPII
NM_023872	Kcnq5	chr1	21388483	21952023	-	47.1046	169.032	11.8254	40.3232	12.1335	23.418	16.7389	0.0613836	Bivalent with poised RNAPII
NM_001033228	Itga1	chr13	115748288	115892172	-	74.1036	81.3009	14.1904	30.6068	19.8181	30.9945	16.1189	0.11438	Bivalent with poised RNAPII
NM_010338	Gpr37	chr6	25618522	25639980	-	25.8501	175.004	12.4166	55.3837	14.9647	18.5967	13.0191	0	Bivalent with poised RNAPII
NM_033588	Pcdhga5	chr18	37854154	38001524	+	51.7002	198.429	39.0237	36.9224	35.5917	21.3517	19.2187	0.222883	Bivalent with poised RNAPII
NM_008675	Nbl1	chr4	138638206	138648885	-	52.8491	204.401	20.1031	87.4479	21.4359	49.5911	19.8387	0.344361	Bivalent with poised RNAPII
NM_008010	Fgfr3	chr5	34064372	34079717	+	47.1046	182.812	21.8769	133.115	15.7736	113.646	27.2782	0	Bivalent with poised RNAPII
NM_028966	Samd4	chr14	47502639	47725492	+	74.1036	146.525	11.2341	92.3061	15.3691	107.447	22.9385	0.319993	Bivalent with poised RNAPII
NM_177355	Plcxd3	chr15	4325490	4525579	+	38.4879	137.798	12.4166	31.0926	12.9424	18.5967	17.3589	0	Bivalent with poised RNAPII
NM_010391	H2-Q10	chr17	35607033	35611508	+	22.4034	68.8991	10.0516	65.5859	8.08902	12.3978	13.6391	1.00791	Bivalent with poised RNAPII
NM_011983	Homer2	chr7	88745366	88851811	-	48.8279	220.936	18.9206	50.5255	16.9869	30.3057	19.8387	6.16924e-06	Bivalent with poised RNAPII
NM_019810	Slc5a1	chr5	33446867	33505348	+	61.4658	143.769	27.1983	56.3553	29.9294	24.7956	27.8982	0.354397	Bivalent with poised RNAPII
NM_019636	Tbc1d1	chr5	64551449	64742725	+	102.251	229.204	18.9206	160.807	17.7958	49.5911	26.0383	0.142585	Bivalent with poised RNAPII
NM_010076	Drd1a	chr13	54146552	54151027	-	34.4668	161.683	18.9206	27.6918	14.1558	13.7753	29.1381	0	Bivalent with poised RNAPII
NM_001038619	Dnm3	chr1	163917432	164408161	-	51.7002	118.506	23.6507	31.0926	15.3691	17.2191	20.4586	0.0225881	Bivalent with poised RNAPII
NM_178804	Slit2	chr5	48374393	48697017	+	99.9537	90.9468	31.3372	98.136	25.076	38.5709	22.3185	0.625392	Bivalent with poised RNAPII
NM_028472	Bmper	chr9	23027519	23289659	+	81.5714	212.209	20.6944	51.0113	19.0092	38.5709	14.2591	1.59366	Bivalent with poised RNAPII
NM_145967	Vstm2a	chr11	16157726	16184554	+	43.6579	202.104	17.1468	28.1777	14.9647	22.7293	20.4586	9.80478e-06	Bivalent with poised RNAPII
NM_008421	Kcnc1	chr7	53651837	53688723	+	43.6579	187.865	11.8254	51.4971	16.178	26.1731	26.6582	0	Bivalent with poised RNAPII
NM_001033339	Mmp25	chr17	23766424	23782236	-	64.338	101.052	19.5119	37.4083	20.627	22.7293	18.5988	0.182432	Bivalent with poised RNAPII
NM_001025597	Ikzf1	chr11	11586215	11672929	+	122.932	159.846	28.9722	64.6143	17.7958	68.8766	17.9788	0	Bivalent with poised RNAPII
NM_007937	Epha5	chr5	84483787	84846407	-	47.6791	163.521	8.86903	52.9546	16.9869	20.663	14.2591	0.0381326	Bivalent with poised RNAPII
NM_181397	Rftn1	chr17	50132631	50329822	-	67.7847	146.525	11.8254	51.0113	16.9869	39.9484	20.4586	0.095357	Bivalent with poised RNAPII
NM_176860	Ubash3b	chr9	40821723	40965577	-	92.4859	163.98	11.8254	97.6502	15.7736	21.3517	21.6986	0.92398	Bivalent with poised RNAPII
NM_008006	Fgf2	chr3	37247574	37303752	+	44.2324	182.812	17.7381	85.0188	16.5825	23.418	21.6986	0	Bivalent with poised RNAPII
NM_054068	Vsx1	chr2	150506439	150514873	-	62.6147	215.425	24.242	58.2986	15.7736	22.0405	19.8387	0.0491328	Bivalent with poised RNAPII
NM_019568	Cxcl14	chr13	56390005	56397912	-	52.2746	206.238	17.7381	78.7031	31.5472	31.6832	24.1784	0.942055	Bivalent with poised RNAPII
NM_010136	Eomes	chr9	118387306	118395250	+	125.804	233.338	24.242	201.13	19.0092	950.497	27.2782	1.39966	Bivalent with poised RNAPII
NM_001033458	Gm1673	chr5	34326122	34327655	+	50.5513	177.76	20.6944	102.023	17.7958	17.9079	30.9979	0.728661	Bivalent with poised RNAPII
NM_011821	Gpc6	chr14	117324536	118378751	+	265.969	127.234	20.6944	174.896	18.2003	48.2136	28.5181	0.630994	Bivalent with poised RNAPII
NM_008239	Foxq1	chr13	31650038	31652843	+	82.7203	176.841	17.7381	155.463	12.538	210.762	19.8387	2.82566	Bivalent with poised RNAPII
NM_144551	Trib2	chr12	15798532	15823591	-	110.294	125.856	22.4682	91.3345	17.7958	30.9945	21.0786	0.227489	Bivalent with poised RNAPII
NM_011074	Cdk14	chr5	4803384	5380251	-	124.655	180.516	17.7381	66.0717	17.7958	22.7293	22.3185	0.289565	Bivalent with poised RNAPII
NM_001083334	Bin1	chr18	32536870	32595394	+	123.506	169.951	10.6428	89.3912	16.5825	139.819	17.3589	1.14988	Bivalent with poised RNAPII
NM_018779	Pde3a	chr6	141197789	141447872	+	55.7213	145.147	12.4166	41.2948	6.87567	45.4585	25.4183	0	Bivalent with poised RNAPII
NM_172753	Csgalnact1	chr8	70880679	71259045	-	53.998	175.463	12.4166	35.465	12.9424	12.3978	19.2187	0.0773152	Bivalent with poised RNAPII
NM_008703	Nmbr	chr10	14480094	14490362	+	39.6368	105.186	10.6428	24.7769	9.30237	11.0202	15.499	0.0851211	Bivalent with poised RNAPII
NM_007746	Map3k8	chr18	4331324	4352951	-	69.508	120.803	20.1031	88.4195	19.4136	15.8416	24.7984	0.609518	Bivalent with poised RNAPII
NM_013845	Ror1	chr4	99768395	100115150	+	52.2746	106.105	24.242	88.4195	19.0092	50.2799	19.2187	0.0123715	Bivalent with poised RNAPII
NM_001043355	Map6	chr7	106416855	106485647	+	35.6157	146.525	26.6071	114.654	24.6715	20.663	32.2379	0.715441	Bivalent with poised RNAPII
NM_009655	Alcam	chr16	52249108	52453110	-	65.4869	148.363	18.9206	43.7239	14.9647	21.3517	28.5181	0.251898	Bivalent with poised RNAPII
NM_170778	Dpyd	chr3	118265095	119135836	+	64.9124	73.4924	13.0079	28.1777	10.9202	17.2191	21.6986	0.0390274	Bivalent with poised RNAPII
NM_201354	Ctif	chr18	75590870	75857350	-	112.017	123.559	20.6944	86.4763	19.4136	118.468	23.5584	0.248831	Bivalent with poised RNAPII
NM_011950	Mapk13	chr17	28906261	28915649	+	103.4	69.3584	14.1904	65.1001	15.7736	17.2191	20.4586	20.2095	Bivalent with poised RNAPII
NM_011139	Pou2f3	chr9	42932021	43013838	-	24.7012	157.549	11.8254	49.068	9.70682	25.4843	17.3589	0.142489	Bivalent with poised RNAPII
NM_001081306	Ptprz1	chr6	22825501	23002916	+	58.0191	120.803	15.373	50.0396	17.7958	18.5967	24.1784	0.152334	Bivalent with poised RNAPII
NM_015730	Chrna4	chr2	180757015	180773882	-	26.999	168.573	17.1468	44.2098	11.7291	33.0607	33.4778	0.0975684	Bivalent with poised RNAPII
NM_146140	Tram1l1	chr3	124023954	124026178	+	24.7012	84.5162	13.0079	28.6635	12.9424	17.2191	25.4183	0.756143	Bivalent with poised RNAPII
NM_008428	Kcnj8	chr6	142513458	142519876	-	34.4668	187.406	17.1468	33.0359	14.1558	43.3922	20.4586	0.0208068	Bivalent with poised RNAPII
NM_194263	Tbx20	chr9	24525255	24578747	-	36.1901	265.032	17.1468	132.143	15.3691	46.8361	21.0786	0.119306	Bivalent with poised RNAPII
NM_008505	Lmo2	chr2	103810443	103822035	+	73.5291	212.209	29.5634	77.7315	18.6047	61.9889	27.8982	0	Bivalent with poised RNAPII
NM_013460	Adra1d	chr2	131371092	131388021	-	39.6368	234.716	17.1468	119.998	11.7291	80.5856	30.378	0.0188512	Bivalent with poised RNAPII
NM_183297	Nxph4	chr10	126962528	126971615	-	44.8068	255.845	15.9642	89.3912	16.178	33.0607	26.0383	0.252486	Bivalent with poised RNAPII
NM_019431	Cacng4	chr11	107596093	107655778	-	62.6147	176.382	19.5119	67.0434	15.7736	22.7293	19.2187	0.0528493	Bivalent with poised RNAPII
NM_019487	Hebp2	chr10	18259928	18265882	-	22.9779	64.7652	16.5555	52.4687	18.2003	19.2854	16.1189	0.967749	Bivalent with poised RNAPII
NM_018885	Irx4	chr13	73397944	73407068	+	35.0412	259.979	11.2341	107.367	16.178	42.7035	33.4778	0.206694	Bivalent with poised RNAPII
NM_001081428	Fam184a	chr10	53352951	53470715	-	97.0815	162.602	17.7381	33.5217	13.7513	22.7293	15.499	0.948374	Bivalent with poised RNAPII
NM_009785	Cacna2d3	chr14	29718128	30535050	-	39.6368	170.41	12.4166	95.7069	10.1113	115.713	21.0786	0.0354886	Bivalent with poised RNAPII
NM_213727	Amer3	chr1	34636537	34647789	+	80.9969	129.99	11.8254	22.8336	16.5825	22.0405	16.1189	0	Bivalent with poised RNAPII
NM_008711	Nog	chr11	89161951	89163873	-	80.4225	151.578	18.9206	92.7919	12.538	37.8821	21.6986	0.552573	Bivalent with poised RNAPII
NM_019935	Ovol1	chr19	5549136	5560575	-	78.1247	218.64	25.4245	88.9054	24.6715	19.2854	20.4586	0.536043	Bivalent with poised RNAPII
NM_183023	Rims4	chr2	163689616	163744419	-	58.0191	169.492	22.4682	38.3799	17.7958	17.2191	24.7984	0	Bivalent with poised RNAPII
NM_009022	Aldh1a2	chr9	71063595	71144050	+	62.6147	227.826	21.8769	81.1322	21.0314	33.7495	30.9979	0.521035	Bivalent with poised RNAPII
NM_019950	Chst5	chr8	114413034	114434099	-	32.169	88.1909	63.2657	53.4404	63.4988	24.7956	21.6986	0.190757	Bivalent with poised RNAPII
NM_024285	Bves	chr10	45055567	45089514	+	58.0191	181.434	10.0516	13.603	9.30237	18.5967	18.5988	0.352944	Bivalent with poised RNAPII
NM_144821	AI317395	chr10	39721378	39745074	-	62.6147	146.066	10.6428	20.8903	19.4136	17.2191	14.879	0.0500462	Bivalent with poised RNAPII
NM_178675	Slc35f1	chr10	52410306	52831428	+	85.5925	83.5976	15.9642	58.7844	14.5602	18.5967	22.9385	0.12991	Bivalent with poised RNAPII
NM_020505	Vav3	chr3	109143600	109488612	+	92.4859	124.478	15.9642	28.6635	15.7736	19.9742	15.499	0.0632516	Bivalent with poised RNAPII
NM_013526	Gdf6	chr4	9771518	9789492	+	59.7424	214.506	12.4166	97.6502	13.3469	138.442	24.1784	0.0124086	Bivalent with poised RNAPII
NM_011416	Smarca2	chr19	26679649	26852811	+	67.2102	169.951	12.4166	102.508	6.87567	216.961	20.4586	0.150307	Bivalent with poised RNAPII
NM_199241	Sema6d	chr2	124436031	124493506	+	80.4225	163.061	15.9642	25.7485	11.3246	19.2854	26.0383	0	Bivalent with poised RNAPII
NM_022319	Clstn2	chr9	97344813	97933586	-	53.998	207.157	16.5555	97.1643	8.49347	38.5709	26.6582	0.129468	Bivalent with poised RNAPII
NM_177388	Slc41a2	chr10	82693883	82800562	-	63.7636	157.549	13.5992	35.465	10.9202	17.9079	13.6391	0.138261	Bivalent with poised RNAPII
NM_134117	Pkdcc	chr17	83614622	83624409	+	127.527	190.621	24.8333	90.3628	12.538	117.779	26.6582	1.06424	Bivalent with poised RNAPII
NM_174854	Disc1	chr8	127578094	127785051	+	47.1046	222.774	17.1468	99.5934	16.5825	26.1731	27.8982	2.64171e-06	Bivalent with poised RNAPII
NM_001033211	AU022751	chrX	5658335	5660538	-	44.8068	90.9468	8.27776	20.8903	10.5157	8.95395	9.91934	0.362877	Bivalent with poised RNAPII
NM_010467	Hoxd1	chr2	74601036	74603199	+	40.7857	221.396	20.6944	93.2778	16.178	30.9945	27.8982	0.0497868	Bivalent with poised RNAPII
NM_010203	Fgf5	chr5	98683202	98706052	+	41.3601	172.248	23.0595	150.119	17.7958	253.466	17.9788	8.82748e-06	Bivalent with poised RNAPII
NM_130449	Colec12	chr18	9707645	9877993	+	74.678	178.219	15.9642	42.7523	16.5825	26.1731	27.2782	0.648949	Bivalent with poised RNAPII
NM_007627	Cckbr	chr7	112574333	112584852	+	44.8068	158.468	27.1983	17.4896	16.178	19.9742	28.5181	0.0543469	Bivalent with poised RNAPII
NM_053171	Csmd1	chr8	15892544	17535385	-	33.3179	215.425	8.27776	55.8695	12.1335	33.7495	20.4586	0.00880626	Bivalent with poised RNAPII
NM_001038642	Ets1	chr9	32503626	32565405	+	55.7213	159.387	15.9642	74.8165	12.538	37.8821	22.3185	0.541866	Bivalent with poised RNAPII
NM_008276	Hoxd8	chr2	74543545	74545364	+	40.7857	243.903	17.7381	68.5009	12.538	143.263	16.1189	0	Bivalent with poised RNAPII
NM_023438	Tmem132e	chr11	82202401	82259829	+	33.8923	164.899	18.3293	181.697	12.538	159.105	24.7984	0.0211736	Bivalent with poised RNAPII
NM_001039150	Cd44	chr2	102651299	102741822	-	27.5734	103.808	11.2341	18.947	20.2225	31.6832	16.1189	0	Bivalent with poised RNAPII
NM_172537	Sema6d	chr2	124436031	124493506	+	80.4225	163.061	15.9642	25.7485	11.3246	19.2854	26.0383	0	Bivalent with poised RNAPII
NM_010020	Slc6a3	chr13	73674194	73716120	+	45.3813	164.899	21.8769	60.7277	14.5602	20.663	16.7389	0.0634923	Bivalent with poised RNAPII
NM_011348	Sema3e	chr5	14025275	14256689	+	141.314	90.0282	18.3293	62.1852	26.6938	17.2191	32.8578	0.943171	Bivalent with poised RNAPII
NM_053080	Aldh1a3	chr7	73535778	73572363	-	52.2746	191.999	10.0516	69.9583	14.1558	30.3057	19.2187	0.0516833	Bivalent with poised RNAPII
NM_175460	Nmnat2	chr1	154802230	154966391	+	113.166	194.755	17.7381	46.6389	19.4136	19.2854	28.5181	2.59148	Bivalent with poised RNAPII
NM_008434	Kcnq1	chr7	150293158	150612947	+	38.4879	201.645	13.0079	70.93	18.2003	28.2394	23.5584	0.0876996	Bivalent with poised RNAPII
NM_016695	Mpp2	chr11	101918330	101949829	-	114.889	79.0043	20.1031	27.6918	15.3691	20.663	23.5584	0.436071	Bivalent with poised RNAPII
NM_010266	Gda	chr19	21465796	21547151	-	36.1901	118.506	10.0516	19.4329	8.08902	19.9742	16.1189	0.0633862	Bivalent with poised RNAPII
NM_001012402	Hs3st6	chr17	24889947	24895629	+	70.6569	191.999	16.5555	28.6635	20.627	30.9945	22.3185	0.202976	Bivalent with poised RNAPII
NM_009519	Wnt11	chr7	105987354	106003257	+	35.0412	280.19	14.1904	138.945	12.9424	70.2541	30.9979	4.67753e-06	Bivalent with poised RNAPII
NM_138682	Lrrc4	chr6	28778125	28781747	-	88.4648	82.2196	44.9364	113.682	50.5564	37.8821	21.0786	0.132903	Bivalent with poised RNAPII
NM_011867	Slc26a4	chr12	32204683	32244834	-	70.0825	180.975	9.4603	30.1209	6.06676	22.0405	15.499	0	Bivalent with poised RNAPII
NM_175643	Adamts2	chr11	50415586	50621075	+	81.5714	206.238	12.4166	110.282	16.5825	130.865	21.6986	0.0408305	Bivalent with poised RNAPII
NM_001081033	Pde11a	chr2	75829188	76176710	-	62.6147	108.861	8.86903	55.8695	10.9202	17.9079	23.5584	0	Bivalent with poised RNAPII
NM_053188	Srd5a2	chr17	74367045	74397256	-	29.8712	246.659	13.5992	43.2381	16.9869	35.127	19.2187	0	Bivalent with poised RNAPII
NM_029554	0610040J01Rik	chr5	64203733	64290858	+	59.7424	161.683	21.8769	33.0359	17.3914	15.8416	19.2187	0.396384	Bivalent with poised RNAPII
NM_009472	Unc5c	chr3	141128527	141497886	+	74.1036	190.621	20.1031	99.1076	11.7291	32.372	14.879	0.0225846	Bivalent with poised RNAPII
NM_007957	Esx1	chrX	133649935	133654865	-	53.4235	93.2435	7.09522	44.2098	4.85341	65.4327	7.43951	1.21193	Bivalent with poised RNAPII
NM_013622	Oprd1	chr4	131666640	131700401	-	45.9557	167.195	15.9642	89.877	16.9869	20.663	22.9385	0.0432788	Bivalent with poised RNAPII
NM_008164	Rhpn1	chr15	75534717	75544849	+	68.9336	128.612	15.9642	42.7523	19.0092	23.418	19.2187	1.83607	Bivalent with poised RNAPII
NM_177809	Slc25a48	chr13	56539715	56573724	+	41.9346	169.951	17.1468	36.4366	15.7736	11.709	19.8387	0.0637721	Bivalent with poised RNAPII
NM_010610	Kcnma1	chr14	24117915	24823427	-	120.634	182.812	19.5119	94.2494	16.178	31.6832	21.6986	0	Bivalent with poised RNAPII
NM_201371	Prmt8	chr6	127639026	127719177	-	48.8279	189.243	33.7023	149.633	26.2893	45.4585	23.5584	0.261649	Bivalent with poised RNAPII
NM_001033281	Prdm6	chr18	53624199	53735511	+	45.3813	200.726	18.9206	166.637	13.3469	1309.34	22.3185	0.068898	Bivalent with poised RNAPII
NM_146042	Rnf144b	chr13	47218088	47343360	+	48.8279	128.152	15.373	39.8374	15.7736	24.7956	19.2187	0.000151481	Bivalent with poised RNAPII
NM_010351	Gsc	chr12	105709418	105711446	-	36.7646	195.673	13.0079	163.722	16.9869	91.6058	26.0383	0.212584	Bivalent with poised RNAPII
NM_177013	Tmem229a	chr6	24901140	24906125	-	113.166	89.1095	17.7381	71.9016	10.1113	31.6832	24.1784	0.16414	Bivalent with poised RNAPII
NM_023456	Npy	chr6	49772727	49779504	+	31.5946	163.521	5.32142	33.0359	13.7513	32.372	20.4586	0.361581	Bivalent with poised RNAPII
NM_001083616	Cacna1d	chr14	30853124	31166672	-	30.4457	200.726	11.2341	45.6672	12.9424	29.6169	19.2187	0	Bivalent with poised RNAPII
NM_172829	St6gal2	chr17	55585014	55638524	+	51.1257	197.511	14.7817	30.6068	10.1113	22.0405	26.6582	0	Bivalent with poised RNAPII
NM_008393	Irx3	chr8	94322409	94325553	-	39.6368	153.875	14.7817	185.098	10.9202	497.289	19.2187	0.172715	Bivalent with poised RNAPII
NM_198429	Nfatc1	chr18	80802943	80909810	-	52.8491	227.826	16.5555	135.058	14.1558	66.8103	20.4586	0	Bivalent with poised RNAPII
NM_011902	Tekt2	chr4	125999364	126002443	-	39.0624	74.8704	18.9206	66.0717	19.4136	15.8416	19.2187	0.831604	Bivalent with poised RNAPII
NM_172051	Tmcc3	chr10	93977601	94053699	+	187.27	82.2196	18.3293	77.7315	14.5602	42.7035	24.7984	0.537113	Bivalent with poised RNAPII
NM_175750	Plxna4	chr6	32094558	32538192	-	36.1901	208.075	9.4603	101.537	7.28012	39.9484	20.4586	0.0100095	Bivalent with poised RNAPII
NM_177290	Itgb8	chr12	120401275	120476749	-	35.0412	125.856	19.5119	27.6918	13.3469	24.7956	33.4778	0	Bivalent with poised RNAPII
NM_177278	L3mbtl4	chr17	68623136	69129426	+	29.2968	132.286	12.4166	32.5501	14.9647	11.0202	10.5393	0	Bivalent with poised RNAPII
NM_007529	Bcan	chr3	87791452	87804278	-	35.0412	235.635	17.1468	117.569	12.538	68.8766	17.3589	0.322625	Bivalent with poised RNAPII
NM_023396	Rprm	chr2	53936503	53937963	-	44.8068	89.1095	17.7381	39.3516	12.538	19.2854	17.3589	0.52559	Bivalent with poised RNAPII
NM_008449	Kif5c	chr2	49474833	49630298	+	109.145	111.157	20.6944	36.4366	17.7958	26.8619	17.9788	1.13912	Bivalent with poised RNAPII
NM_175519	Kctd8	chr5	69500523	69732948	-	50.5513	122.181	8.27776	82.5897	10.1113	23.418	26.0383	0.0768911	Bivalent with poised RNAPII
NM_172913	Tox3	chr8	92771010	92872151	-	67.7847	129.071	19.5119	60.2419	16.5825	30.3057	16.7389	0.386823	Bivalent with poised RNAPII
NM_008440	Kif1a	chr1	94912032	94998442	-	74.678	188.324	18.3293	68.015	19.4136	18.5967	27.8982	0	Bivalent with poised RNAPII
NM_008984	Ptprm	chr17	67016187	67703799	-	87.8903	151.119	13.0079	61.6994	12.9424	19.9742	28.5181	0.123182	Bivalent with poised RNAPII
NM_011808	Ets1	chr9	32503626	32565405	+	55.7213	159.387	15.9642	74.8165	12.538	37.8821	22.3185	0.159186	Bivalent with poised RNAPII
NM_001081160	Mdga1	chr17	29964902	30024827	-	58.5935	208.075	18.3293	190.928	16.5825	94.3609	23.5584	0.263717	Bivalent with poised RNAPII
NM_008093	Gata5	chr2	180059792	180069384	-	45.9557	238.85	20.1031	210.361	25.076	42.0147	34.0977	0.0133293	Bivalent with poised RNAPII
NM_010228	Flt1	chr5	148373771	148537564	-	67.7847	237.932	21.2857	130.2	15.7736	372.622	33.4778	0.210745	Bivalent with poised RNAPII
NM_011198	Ptgs2	chr1	151947253	151955142	+	36.7646	95.0808	15.9642	36.4366	13.7513	37.1933	20.4586	0.565889	Bivalent with poised RNAPII
NM_010483	Htr5b	chr1	123406349	123425042	-	28.1479	127.234	12.4166	50.5255	17.3914	18.5967	23.5584	0.137589	Bivalent with poised RNAPII
NM_022723	Scube1	chr15	83433012	83555469	-	49.9768	178.219	13.5992	58.2986	13.7513	27.5506	19.2187	5.32639e-06	Bivalent with poised RNAPII
NM_001013386	Rasl10b	chr11	83223573	83234540	+	58.0191	174.085	21.2857	53.9262	16.5825	24.7956	13.0191	0.214228	Bivalent with poised RNAPII
NM_030060	Batf3	chr1	192922292	192932822	+	48.2535	148.822	25.4245	19.9187	19.4136	15.8416	23.5584	1.13464	Bivalent with poised RNAPII
NM_198034	Sidt1	chr16	44240292	44332951	-	57.4446	263.654	20.1031	59.7561	15.7736	15.1528	30.9979	0	Bivalent with poised RNAPII
NM_007607	Car4	chr11	84771255	84779556	+	103.4	142.851	20.6944	18.4612	24.6715	28.2394	26.0383	17.6141	Bivalent with poised RNAPII
NM_019944	Mnx1	chr5	29800362	29805010	-	60.3169	261.357	15.9642	147.69	15.3691	163.926	27.2782	0	Bivalent with poised RNAPII
NM_001048207	Gypc	chr18	32687973	32719688	-	39.0624	81.7603	20.1031	17.9754	16.5825	16.5304	27.8982	0.0417397	Bivalent with poised RNAPII
NM_001085502	Nt5c1a	chr4	122878795	122893450	+	31.0201	159.846	17.1468	57.8128	14.5602	34.4383	21.6986	0	Bivalent with poised RNAPII
NM_130865	Dmbx1	chr4	115587723	115612531	-	32.7434	269.166	18.3293	154.491	22.6493	118.468	24.7984	0.000785753	Bivalent with poised RNAPII
NM_018760	Slc4a4	chr5	89316284	89668681	+	87.8903	240.228	21.2857	38.8657	16.178	19.9742	26.6582	2.58025e-06	Bivalent with poised RNAPII
NM_153166	Cpne5	chr17	29293465	29374735	-	56.2958	180.056	22.4682	69.4725	14.9647	21.3517	21.0786	0.625162	Bivalent with poised RNAPII
NM_009209	Slc6a2	chr8	95484945	95525566	+	34.4668	184.19	9.4603	23.8053	12.9424	30.3057	18.5988	0.0351897	Bivalent with poised RNAPII
NM_026797	Dbndd2	chr2	164311954	164318823	+	68.9336	147.903	25.4245	57.8128	19.8181	19.9742	19.8387	0	Bivalent with poised RNAPII
NM_198418	Tdrd6	chr17	43752283	43767248	-	34.4668	167.654	16.5555	64.1285	10.9202	19.9742	29.1381	0.000571548	Bivalent with poised RNAPII
NM_009623	Adcy8	chr15	64530596	64753858	-	51.7002	180.056	7.09522	181.211	7.28012	28.2394	24.7984	0	Bivalent with poised RNAPII
NM_009396	Tnfaip2	chr12	112680871	112693229	+	38.4879	195.673	23.0595	49.068	13.7513	31.6832	32.2379	0.0981489	Bivalent with poised RNAPII
NM_033610	Sncb	chr13	54860220	54867801	-	60.8913	123.559	24.8333	28.6635	20.2225	26.8619	26.6582	0.249453	Bivalent with poised RNAPII
NM_172289	Slc36a4	chr9	15514212	15543233	+	39.6368	137.339	17.1468	39.3516	15.7736	13.7753	13.6391	0.119086	Bivalent with poised RNAPII
NM_010348	Grik1	chr16	87896141	88290503	-	35.0412	199.807	13.5992	39.3516	9.70682	21.3517	12.3992	0	Bivalent with poised RNAPII
NM_010836	Msx3	chr7	147232055	147234987	-	41.9346	290.754	25.4245	137.488	20.2225	34.4383	32.2379	0	Bivalent with poised RNAPII
NM_016869	Corin	chr5	72691263	72895447	-	71.2314	169.951	11.2341	59.2702	14.5602	28.9282	21.6986	8.27189e-06	Bivalent with poised RNAPII
NM_001081208	Hs3st5	chr10	36226612	36554200	+	153.952	139.176	14.1904	120.97	14.9647	20.663	24.1784	0.0151305	Bivalent with poised RNAPII
NM_021715	Chst7	chrX	19636695	19674646	+	62.0402	63.3872	11.2341	23.3194	8.89792	3.44383	13.6391	0.103668	Bivalent with poised RNAPII
NM_023622	Rgl3	chr9	21775970	21793897	-	47.6791	197.97	25.4245	61.6994	20.2225	42.7035	20.4586	0.703947	Bivalent with poised RNAPII
NM_021457	Fzd1	chr5	4753838	4758216	-	84.4436	142.851	21.8769	180.24	15.3691	36.5046	25.4183	0.267157	Bivalent with poised RNAPII
NM_033581	Pcdhgc3	chr18	37966063	38001526	+	90.7625	158.927	56.1705	71.4158	48.5341	25.4843	29.1381	0.156871	Bivalent with poised RNAPII
NM_022983	Lpar3	chr3	145883924	145949178	+	40.7857	195.673	13.5992	43.7239	12.1335	22.0405	21.6986	0.324516	Bivalent with poised RNAPII
NM_017469	Gucy1b3	chr3	81835925	81878633	-	43.0835	120.344	13.5992	48.5822	12.9424	13.0865	18.5988	0.000475719	Bivalent with poised RNAPII
NM_009324	Tbx2	chr11	85646116	85655450	+	33.3179	263.195	28.9722	252.141	23.0537	317.521	28.5181	0.11068	Bivalent with poised RNAPII
NM_001037906	Nell1	chr7	57230719	58118659	+	25.8501	195.214	10.0516	71.4158	10.5157	53.7237	22.3185	0.126655	Bivalent with poised RNAPII
NM_001048228	Dbndd2	chr2	164312376	164318823	+	69.508	146.525	23.6507	58.7844	16.9869	24.7956	21.0786	0.000178893	Bivalent with poised RNAPII
NM_020287	Insm2	chr12	56699903	56703004	+	62.0402	205.319	24.8333	132.629	19.4136	33.0607	23.5584	0	Bivalent with poised RNAPII
NM_178663	Bend7	chr2	4638876	4723192	+	163.143	176.382	20.6944	15.5463	19.0092	25.4843	19.2187	0.0187705	Bivalent with poised RNAPII
NM_007702	Cidea	chr18	67503217	67527448	+	49.4024	136.42	22.4682	63.6426	18.6047	30.3057	24.1784	0.429588	Bivalent with poised RNAPII
NM_010882	Ndn	chr7	69493162	69494813	+	68.3591	98.2961	12.4166	17.4896	20.627	20.663	17.3589	5.98894	Bivalent with poised RNAPII
NM_008719	Npas2	chr1	39251116	39420085	+	83.8692	238.391	12.4166	183.641	11.7291	73.0092	20.4586	0.290842	Bivalent with poised RNAPII
NM_011196	Ptger3	chr3	157229855	157307722	+	47.1046	124.478	10.0516	88.9054	11.3246	13.7753	22.3185	0.0455095	Bivalent with poised RNAPII
NM_001099664	Npw	chr17	24794274	24795370	-	44.2324	165.817	18.9206	48.5822	14.9647	20.663	27.8982	0.716241	Bivalent with poised RNAPII
NM_025685	Col27a1	chr4	62876445	62996024	+	136.144	178.219	15.373	69.9583	18.6047	26.1731	23.5584	0.444773	Bivalent with poised RNAPII
NM_009463	Ucp1	chr8	85814246	85822355	+	40.2113	94.1621	20.1031	11.6597	18.6047	17.2191	24.1784	0.114629	Bivalent with poised RNAPII
NM_178870	Hs3st3a1	chr11	64248833	64336337	+	67.2102	129.071	14.1904	46.1531	14.9647	32.372	18.5988	0.0221498	Bivalent with poised RNAPII
NM_001042725	Calcr	chr6	3635719	3713623	-	39.6368	134.124	10.6428	45.1814	12.9424	43.3922	14.2591	0.0379193	Bivalent with poised RNAPII
NM_173021	Phka1	chrX	99709313	99839585	-	45.3813	59.7126	11.8254	16.0321	13.3469	14.4641	16.1189	1.02548	Bivalent with poised RNAPII
NM_010019	Dapk2	chr9	66006032	66120049	+	52.8491	146.525	21.2857	27.6918	18.6047	19.9742	19.8387	0.316451	Bivalent with poised RNAPII
NM_030610	Fgf20	chr8	41364519	41372307	-	44.8068	164.439	16.5555	44.6956	15.3691	28.2394	21.0786	0	Bivalent with poised RNAPII
NM_007524	Nkx3-2	chr5	42152721	42155459	-	48.2535	242.066	16.5555	197.729	15.7736	75.0755	22.3185	0	Bivalent with poised RNAPII
NM_010201	Fgf14	chr14	124377512	124591768	-	86.7414	215.884	13.5992	21.3762	14.1558	24.7956	18.5988	0.0630371	Bivalent with poised RNAPII
NM_144944	Prokr2	chr2	132196064	132211183	-	40.2113	139.176	16.5555	39.8374	14.5602	22.0405	23.5584	0.0381622	Bivalent with poised RNAPII
NM_001079844	Gpc6	chr14	117324536	118378751	+	265.969	127.234	20.6944	174.896	18.2003	48.2136	28.5181	3.2196e-05	Bivalent with poised RNAPII
NM_020589	Zfp467	chr6	48386611	48395824	-	60.8913	122.64	23.0595	69.9583	14.9647	356.781	13.6391	0	Bivalent with poised RNAPII
NM_133969	Cyp4v3	chr8	46391155	46418550	-	39.6368	101.052	13.5992	17.9754	9.70682	23.418	15.499	0.0454412	Bivalent with poised RNAPII
NM_010134	En2	chr5	28492235	28498706	+	68.3591	192.917	21.2857	164.694	19.8181	233.492	26.6582	0.28497	Bivalent with poised RNAPII
NM_019515	Nmu	chr5	76762519	76792802	-	32.169	91.4061	11.2341	38.3799	16.9869	23.418	23.5584	0.201614	Bivalent with poised RNAPII
NM_153417	Trpm6	chr19	18824472	18967001	+	47.1046	120.803	7.09522	22.3478	13.3469	22.7293	19.8387	0.262056	Bivalent with poised RNAPII
NM_009525	Wnt5b	chr6	119382548	119494365	-	71.2314	219.558	13.0079	56.8411	17.3914	28.9282	24.7984	0	Bivalent with poised RNAPII
NM_001033301	Fhdc1	chr3	84246117	84284361	-	134.42	204.86	18.3293	130.686	16.9869	55.1012	24.7984	0.28128	Bivalent with poised RNAPII
NM_146168	Vopp1	chr6	57702257	57775119	-	83.8692	210.831	7.68649	31.5784	16.9869	10.3315	14.879	1.0161	Bivalent with poised RNAPII
NM_008418	Kcna3	chr3	106839079	106841047	+	69.508	172.707	24.8333	76.7598	16.178	24.7956	29.1381	0	Bivalent with poised RNAPII
NM_175427	Fam163b	chr2	26965898	26997997	-	42.509	101.971	17.7381	29.1493	13.3469	15.1528	22.3185	0.24094	Bivalent with poised RNAPII
NM_001029836	Npnt	chr3	132545658	132613255	-	86.167	172.248	12.4166	53.4404	13.3469	36.5046	14.2591	0	Bivalent with poised RNAPII
NM_146052	Lrrc3b	chr14	16190030	16271501	-	47.6791	113.913	20.1031	35.9508	21.8403	13.7753	20.4586	0.113371	Bivalent with poised RNAPII
NM_007628	Ccna1	chr3	54849390	54858977	-	74.678	112.535	17.1468	29.6351	13.3469	26.1731	15.499	0.87859	Bivalent with poised RNAPII
NM_172589	Lhfpl2	chr13	94827750	94965364	+	98.2303	176.382	20.6944	50.5255	15.3691	42.0147	21.0786	1.27569	Bivalent with poised RNAPII
NM_178748	Egflam	chr15	7156119	7348304	-	35.0412	177.76	16.5555	34.4933	15.3691	77.1417	17.9788	0.203483	Bivalent with poised RNAPII
NM_175012	Grp	chr18	66033147	66046233	+	41.3601	185.568	27.1983	97.1643	30.3338	24.1068	20.4586	0	Bivalent with poised RNAPII
NM_009404	Tnfsf9	chr17	57244807	57247180	+	72.9547	124.478	21.8769	45.6672	21.4359	32.372	26.0383	0.643204	Bivalent with poised RNAPII
NM_001044308	Cacna1i	chr15	80117667	80228722	+	39.0624	206.697	19.5119	50.5255	13.3469	25.4843	26.6582	0.00861535	Bivalent with poised RNAPII
NM_176942	Gabra5	chr7	64663038	64765379	-	49.4024	183.731	11.2341	50.0396	13.7513	22.7293	15.499	0.0668633	Bivalent with poised RNAPII
NM_010720	Lipg	chr18	75098975	75120917	-	53.998	220.018	27.7896	96.1927	21.8403	24.1068	25.4183	0.414934	Bivalent with poised RNAPII
NM_033603	Amn	chr12	112509321	112514637	+	55.7213	153.875	31.3372	54.8978	32.7605	24.1068	29.1381	3.14873	Bivalent with poised RNAPII
NM_138944	Pou4f2	chr8	80956907	80960551	-	60.8913	167.654	26.0158	176.839	22.6493	73.6979	20.4586	0.370653	Bivalent with poised RNAPII
NM_001011874	Xkr4	chr1	3204562	3661579	-	131.548	112.076	14.1904	71.9016	10.5157	14.4641	19.2187	0.0240796	Bivalent with poised RNAPII
NM_025491	Susd3	chr13	49326201	49343532	-	55.7213	137.798	18.9206	94.2494	16.9869	22.0405	26.6582	0.131612	Bivalent with poised RNAPII
NM_207654	Efna5	chr17	62952305	63230666	-	126.378	110.698	11.2341	168.58	14.5602	102.626	32.2379	3.39876e-05	Bivalent with poised RNAPII
NM_016975	Gja3	chr14	57653296	57676867	-	94.7837	224.152	10.0516	41.7807	9.30237	18.5967	29.758	0.000141677	Bivalent with poised RNAPII
NM_001042726	Pcdh8	chr14	80166578	80171119	-	28.1479	248.496	10.0516	76.274	13.3469	33.7495	29.1381	0.0353148	Bivalent with poised RNAPII
NM_001038499	Arsi	chr18	61071893	61077422	+	41.3601	208.994	25.4245	46.6389	14.9647	37.8821	30.9979	0.380611	Bivalent with poised RNAPII
NM_008937	Prox1	chr1	191945657	191994559	-	47.1046	198.889	18.9206	195.3	14.5602	818.942	26.0383	0	Bivalent with poised RNAPII
NM_011613	Tnfsf11	chr14	78677252	78707850	-	72.9547	155.712	7.09522	30.1209	6.47121	19.2854	22.9385	0.28456	Bivalent with poised RNAPII
NM_145515	Mark1	chr1	186720302	186823428	-	94.7837	146.066	17.1468	43.7239	12.1335	16.5304	21.0786	0.947058	Bivalent with poised RNAPII
NM_027420	2610034B18Rik	chr7	87070244	87080150	-	44.2324	84.9756	22.4682	78.2173	21.4359	26.8619	24.7984	0.646312	Bivalent with poised RNAPII
NM_019867	Ngef	chr1	89373403	89406937	-	53.4235	188.324	17.7381	41.2948	8.89792	18.5967	27.2782	0.0162098	Bivalent with poised RNAPII
NM_010710	Lhx2	chr2	38206827	38225248	+	44.8068	313.261	21.2857	173.438	10.1113	643.996	37.1975	0.197426	Bivalent with poised RNAPII
NM_007656	Cd82	chr2	93259258	93302659	-	50.5513	158.009	15.9642	25.2627	8.49347	33.7495	23.5584	0	Bivalent with poised RNAPII
NM_013601	Msx2	chr13	53562249	53568149	-	60.3169	340.362	21.8769	89.3912	16.178	40.6372	17.3589	1.07522	Bivalent with poised RNAPII
NM_021358	Htr6	chr4	138617323	138630704	-	95.9326	214.047	20.6944	89.877	21.0314	25.4843	25.4183	0.1425	Bivalent with poised RNAPII
NM_177130	Glt28d2	chr3	85673767	85691440	-	91.9114	113.454	20.6944	20.4045	17.7958	15.1528	15.499	0	Bivalent with poised RNAPII
NM_008090	Gata2	chr6	88148657	88157026	+	43.6579	223.692	12.4166	190.442	16.5825	88.8508	27.8982	0.842452	Bivalent with poised RNAPII
NM_021464	Ptprt	chr2	161353358	162486883	-	40.2113	197.97	10.6428	77.7315	11.7291	35.127	17.9788	0.0306105	Bivalent with poised RNAPII
NM_198860	Fam211b	chr10	75012869	75023075	-	45.3813	216.803	15.373	42.2665	8.89792	26.1731	27.2782	0.00939308	Bivalent with poised RNAPII
NM_172874	Podn	chr4	107687397	107704695	-	51.1257	189.702	21.8769	45.6672	27.0982	25.4843	17.3589	1.7712e-05	Bivalent with poised RNAPII
NM_008748	Dusp8	chr7	149265391	149281189	-	149.356	171.788	24.8333	51.0113	21.0314	23.418	24.1784	0.259537	Bivalent with poised RNAPII
NM_008285	Hrh1	chr6	114347929	114433290	+	36.7646	159.846	14.1904	28.1777	14.9647	28.2394	20.4586	0	Bivalent with poised RNAPII
NM_021320	Ntn4	chr10	93103793	93208717	+	37.9135	224.611	13.0079	29.6351	12.538	24.1068	15.499	0.0561184	Bivalent with poised RNAPII
NM_019982	Sez6l	chr5	112848170	113006218	-	41.3601	203.941	21.2857	57.8128	15.7736	26.1731	22.9385	3.58493e-06	Bivalent with poised RNAPII
NM_029267	Boll	chr1	55356912	55420313	-	58.0191	186.487	20.6944	37.8941	17.3914	21.3517	19.8387	0.149364	Bivalent with poised RNAPII
NM_001081425	Rbm24	chr13	46513668	46526468	+	40.7857	142.391	20.1031	83.0755	14.1558	19.2854	21.6986	0.0273467	Bivalent with poised RNAPII
NM_010482	Htr1b	chr9	81524998	81526159	-	116.038	141.932	14.1904	90.3628	15.3691	47.5248	24.1784	0.0861867	Bivalent with poised RNAPII
NM_013886	Hdgfrp3	chr7	89026141	89079345	-	81.5714	224.611	16.5555	77.2456	11.3246	32.372	18.5988	1.18869	Bivalent with poised RNAPII
NM_019691	Gria4	chr9	4417892	4796234	-	47.6791	84.0569	13.5992	44.2098	20.627	15.8416	24.7984	0.0289624	Bivalent with poised RNAPII
NM_031174	Dscam	chr16	96813686	97392342	-	65.4869	192.458	15.9642	26.2344	12.9424	17.9079	20.4586	0.0283865	Bivalent with poised RNAPII
NM_153508	Clstn3	chr6	124380773	124414802	-	38.4879	55.5786	24.242	41.2948	23.0537	26.8619	19.8387	2.85605	Bivalent with poised RNAPII
NM_001082976	Tc2n	chr12	102886811	102956712	-	99.3792	123.1	15.373	32.0642	12.1335	19.2854	24.7984	0.540932	Bivalent with poised RNAPII
NM_001081121	4931429I11Rik	chr9	40702931	40772195	-	31.5946	175.922	10.0516	18.947	9.30237	28.9282	19.2187	0	Bivalent with poised RNAPII
NM_177182	Bhlha9	chr11	76485971	76487178	+	29.8712	221.396	21.2857	66.0717	14.9647	28.2394	24.1784	0.123361	Bivalent with poised RNAPII
NM_008275	Hoxd13	chr2	74506366	74509656	+	39.6368	256.305	14.1904	181.697	10.9202	364.357	24.7984	0.181156	Bivalent with poised RNAPII
NM_177261	Kndc1	chr7	147080594	147127439	+	67.2102	135.502	13.5992	34.0075	13.7513	22.7293	20.4586	1.70492	Bivalent with poised RNAPII
NM_177751	Cnksr2	chrX	154259504	154481042	-	53.998	115.291	3.54761	31.5784	6.87567	12.3978	12.3992	0.190159	Bivalent with poised RNAPII
NM_011214	Ptpru	chr4	131324371	131394193	-	52.2746	143.31	17.1468	131.658	14.9647	22.7293	25.4183	0.705119	Bivalent with poised RNAPII
NM_008858	Prkd1	chr12	51442218	51750210	-	96.507	145.607	15.9642	18.947	14.1558	25.4843	17.3589	0.855306	Bivalent with poised RNAPII
NM_026047	Rnf219	chr14	104876750	104921883	-	47.6791	240.688	23.0595	13.603	11.7291	15.1528	16.7389	1.15556	Bivalent with poised RNAPII
NM_001081433	Ankrd44	chr1	54702183	54983231	-	128.102	185.109	17.1468	41.7807	11.7291	25.4843	19.8387	0.340968	Bivalent with poised RNAPII
NM_001012477	Cxcl12	chr6	117118552	117131386	+	37.9135	163.061	13.5992	118.54	10.5157	22.7293	19.2187	0	Bivalent with poised RNAPII
NM_012020	Foxl2	chr9	98856025	98858545	+	42.509	201.185	14.7817	242.425	12.9424	522.773	29.1381	0.0178264	Bivalent with poised RNAPII
NM_001038607	Kcnh1	chr1	194014753	194334040	+	59.168	130.908	23.6507	20.8903	21.8403	11.709	13.6391	0.0890537	Bivalent with poised RNAPII
NM_031158	Ank1	chr8	24168730	24260968	+	52.8491	186.487	26.0158	19.4329	20.627	13.0865	16.1189	0	Bivalent with poised RNAPII
NM_009723	Atp2b2	chr6	113695661	113992074	-	28.7223	133.664	13.0079	48.0963	10.9202	19.2854	21.0786	8.479e-06	Bivalent with poised RNAPII
NM_011993	Dpysl4	chr7	146271899	146287690	+	95.3581	123.559	17.7381	61.2135	16.178	24.7956	19.8387	1.23778	Bivalent with poised RNAPII
NM_172655	Hecw2	chr1	53987658	54251878	-	68.3591	215.884	11.2341	18.4612	11.7291	17.9079	22.3185	0	Bivalent with poised RNAPII
NM_147153	Vps39	chr2	120142196	120178869	-	207.95	11.4832	117.071	97.1643	105.157	19.9742	17.3589	0.000171825	Transcriptionally Active
NM_133247	Usp33	chr3	152009441	152056578	+	145.335	32.6122	49.6666	51.4971	42.0629	15.8416	18.5988	2.90873	Transcriptionally Active
NM_133219	Gcnt2	chr13	41013002	41056261	+	181.525	14.6985	93.4204	130.686	92.2148	24.7956	21.6986	6.40816	Transcriptionally Active
NM_053163	Mrpl36	chr13	73468456	73469626	+	338.349	5.51193	117.071	129.714	82.9124	9.64272	26.6582	22.9083	Transcriptionally Active
NM_145908	Porcn	chrX	7770975	7783651	-	371.667	28.9376	59.1268	68.5009	57.432	11.709	14.879	4.07107	Transcriptionally Active
NM_172766	Nfrkb	chr9	31193776	31228918	+	217.715	9.64587	83.9601	113.196	69.1611	15.1528	27.8982	4.01618	Transcriptionally Active
NM_183426	Sbno2	chr10	79519758	79565447	-	158.547	9.18655	61.4919	81.618	37.2095	26.8619	20.4586	2.69074	Transcriptionally Active
NM_023514	Mrps9	chr1	42908077	42962528	+	249.31	31.6936	60.3094	150.605	59.4543	18.5967	16.7389	23.3279	Transcriptionally Active
NM_025569	Mgst3	chr1	169302514	169323928	-	258.501	29.397	88.099	126.314	63.9032	25.4843	27.2782	33.1261	Transcriptionally Active
NM_001018002	Dppa4	chr16	48283847	48294405	+	377.411	3.21529	72.1348	46.6389	55.0053	19.2854	18.5988	22.9412	Transcriptionally Active
NM_133940	Fbxl14	chr6	119429685	119433904	+	422.218	18.3731	97.5593	158.864	85.3391	22.0405	27.8982	3.08591	Transcriptionally Active
NM_133878	Rcc1	chr4	131887833	131901665	-	278.032	5.0526	138.948	169.552	124.975	19.2854	32.2379	11.0164	Transcriptionally Active
NM_133966	Taf5l	chr8	126520215	126545209	-	663.486	2.29664	166.738	160.807	124.571	20.663	30.9979	11.4037	Transcriptionally Active
NM_007438	Aldoa	chr7	133938747	133942768	-	861.095	2.29664	228.821	299.266	214.359	13.7753	47.1169	15.3967	Transcriptionally Active
NM_175306	Phactr4	chr4	131911838	131978361	-	268.841	16.0765	65.0395	109.31	52.1742	34.4383	27.2782	0	Transcriptionally Active
NM_023372	Rpl38	chr11	114529856	114533645	+	956.453	3.21529	238.872	184.612	207.888	24.7956	44.0171	2.19576	Transcriptionally Active
NM_001100606	Adat3	chr10	80065624	80070399	+	330.881	4.13395	103.472	188.985	84.9347	20.663	29.1381	2.22176	Transcriptionally Active
NM_001014973	Snx13	chr12	35731860	35832149	+	326.86	33.9902	65.6308	88.4195	65.521	13.0865	21.6986	2.47616	Transcriptionally Active
NM_023507	Ercc6l2	chr13	63916641	63970963	+	186.695	25.7223	147.226	212.79	98.2816	12.3978	36.5776	0.0912933	Transcriptionally Active
NM_011563	Prdx2	chr8	87493546	87498212	+	332.604	4.13395	119.436	95.7069	118.504	19.2854	24.1784	57.4134	Transcriptionally Active
NM_010202	Fgf4	chr7	152047290	152051148	+	844.436	12.8612	336.432	296.351	282.711	31.6832	24.1784	40.123	Transcriptionally Active
NM_009768	Bsg	chr10	79167102	79174724	+	379.135	3.21529	111.158	132.143	92.2148	19.9742	29.758	1.30775	Transcriptionally Active
NM_027135	Sec24d	chr3	122970413	123068554	+	147.633	55.1193	59.7181	50.5255	48.1297	11.0202	21.0786	3.45939	Transcriptionally Active
NM_026254	Tbc1d23	chr16	57168976	57231579	-	263.096	5.0526	34.8848	62.671	37.6139	19.9742	19.8387	9.32351	Transcriptionally Active
NM_010697	Ldb1	chr19	46107090	46114111	-	216.566	3.21529	153.139	209.875	126.189	46.8361	16.7389	1.20674	Transcriptionally Active
NM_025356	Ube2d3	chr3	135101722	135130142	+	747.929	4.13395	292.678	272.546	219.617	15.1528	49.5967	41.5267	Transcriptionally Active
NM_013752	Nbn	chr4	15885113	15919736	+	133.272	2.29664	92.2379	110.767	82.508	11.709	40.2973	2.63564	Transcriptionally Active
NM_145135	Rnh1	chr7	148346224	148354835	-	75.2525	15.6171	54.988	74.8165	44.0851	26.1731	29.1381	3.60815	Transcriptionally Active
NM_029457	Senp2	chr16	22009556	22049342	+	214.269	5.0526	55.5792	48.0963	58.6454	19.9742	22.3185	24.1363	Transcriptionally Active
NM_030886	Ankrd17	chr5	90656190	90795211	-	644.529	3.21529	142.496	103.48	116.886	18.5967	36.5776	0.824132	Transcriptionally Active
NM_010833	Msn	chrX	93291383	93363892	+	103.975	16.0765	21.2857	27.206	19.8181	13.7753	17.9788	10.3358	Transcriptionally Active
NM_010907	Nfkbia	chr12	56590395	56593634	-	331.456	16.9951	127.123	123.885	87.3614	26.8619	37.1975	6.84231	Transcriptionally Active
NM_178623	Urgcp	chr11	5613419	5641179	-	197.035	33.5309	46.1189	68.5009	52.9831	21.3517	13.6391	0.0139789	Transcriptionally Active
NM_021294	Dbil5	chr11	76031114	76032167	+	290.095	6.43058	154.912	225.421	132.255	22.7293	30.378	0.443313	Transcriptionally Active
NM_008892	Pola1	chrX	90550104	90877494	-	271.713	2.75596	52.6229	59.7561	47.7252	12.3978	21.0786	7.7259	Transcriptionally Active
NM_175116	Lpar6	chr14	73637697	73640165	+	388.326	15.1578	49.6666	64.1285	49.7475	20.663	29.758	14.4243	Transcriptionally Active
NM_177270	Cdkl2	chr5	92435099	92472068	-	226.906	63.8465	82.7776	73.8449	54.6009	23.418	30.378	1.44483	Transcriptionally Active
NM_009082	Rpl29	chr9	106331869	106333898	+	443.473	4.59327	129.488	160.321	103.539	11.0202	47.7368	0.488191	Transcriptionally Active
NM_013898	Timm8a1	chrX	131071796	131076168	-	270.564	5.0526	34.8848	27.6918	29.5249	15.1528	15.499	1.05317	Transcriptionally Active
NM_001039089	Sel1l	chr12	93044482	93087597	-	141.888	16.9951	43.7539	61.6994	29.5249	11.709	21.6986	0.553852	Transcriptionally Active
NM_021328	Bin3	chr14	70499951	70538013	+	207.375	34.9089	18.9206	35.465	14.9647	18.5967	25.4183	3.14329	Transcriptionally Active
NM_011504	Stxbp3a	chr3	108596097	108643420	-	151.654	27.5596	31.9285	54.8978	36.4006	20.663	16.7389	4.70589	Transcriptionally Active
NM_145390	Tnpo2	chr8	87560813	87581481	+	889.818	4.59327	310.416	285.177	285.947	13.7753	55.7963	24.0224	Transcriptionally Active
NM_023500	Xk	chrX	8849909	8890371	+	207.375	78.545	19.5119	21.862	16.178	4.82136	7.43951	1.70708	Transcriptionally Active
NM_025639	Cenpm	chr15	82064205	82075177	-	253.331	16.5358	135.992	215.705	105.562	15.8416	29.758	0	Transcriptionally Active
NM_177732	Slc35d1	chr4	102844322	102887489	-	192.44	36.2869	77.4562	66.5576	49.343	19.2854	30.378	2.3033	Transcriptionally Active
NM_009680	Ap3b1	chr13	95128914	95336271	+	258.501	10.1052	60.3094	119.998	60.6676	15.1528	20.4586	8.92859	Transcriptionally Active
NM_001081422	Bod1l	chr5	42178777	42235554	-	221.736	6.43058	36.0674	54.412	35.5917	18.5967	22.9385	3.69342	Transcriptionally Active
NM_030702	Senp3	chr11	69486611	69495472	-	558.362	4.59327	175.015	223.478	146.411	20.663	31.6179	5.89776	Transcriptionally Active
NM_172595	Arl15	chr13	114584715	114947669	+	376.262	10.5645	99.9244	121.941	75.2279	28.2394	43.3971	4.22495	Transcriptionally Active
NM_146112	Gigyf2	chr1	89223572	89347385	+	430.835	3.21529	92.8291	89.877	68.7567	17.2191	29.758	2.34503	Transcriptionally Active
NM_133705	Pycr2	chr1	182834404	182838219	+	413.027	7.34924	147.226	225.421	140.344	14.4641	19.8387	17.1567	Transcriptionally Active
NM_001037665	Zfp1	chr8	114167342	114194908	+	287.798	9.18655	137.766	189.956	123.358	14.4641	30.378	4.22571	Transcriptionally Active
NM_016714	Nup50	chr15	84753857	84773393	+	545.724	7.34924	130.079	203.073	96.6638	12.3978	39.0574	6.25208	Transcriptionally Active
NM_175652	Hist4h4	chr6	136750073	136752952	-	114.315	8.72722	491.344	739.421	406.473	17.2191	48.3568	0.348951	Transcriptionally Active
NM_008146	Golga3	chr5	110605719	110652174	+	280.33	6.43058	79.23	63.6426	57.8365	28.9282	23.5584	1.95185	Transcriptionally Active
NM_001025779	Cdc6	chr11	98769202	98785256	+	248.735	10.1052	105.837	175.382	95.046	18.5967	27.2782	3.12999	Transcriptionally Active
NM_153552	Thoc1	chr18	9958177	9995482	+	495.747	22.507	137.766	205.988	100.304	30.3057	61.9959	26.8419	Transcriptionally Active
NM_026576	Etaa1	chr11	17838751	17853878	-	380.284	11.0239	108.202	85.5046	91.8104	24.7956	35.3377	6.35857	Transcriptionally Active
NM_019421	Cd320	chr17	33980035	33986719	+	250.459	5.0526	122.393	141.86	120.122	21.3517	26.0383	5.57963	Transcriptionally Active
NM_029498	Zmym2	chr14	57506631	57581416	+	332.03	2.29664	26.6071	31.5784	27.0982	9.64272	21.0786	7.38601	Transcriptionally Active
NM_176979	Topbp1	chr9	103207656	103252757	+	403.836	5.51193	149.591	185.098	122.549	13.7753	37.8175	27.4821	Transcriptionally Active
NM_007935	Epc1	chr18	6435948	6516106	-	309.627	22.9664	79.8212	187.527	57.8365	19.2854	45.877	5.24649	Transcriptionally Active
NM_026115	Hat1	chr2	71227316	71279679	+	548.596	0.918655	133.627	157.406	122.953	10.3315	24.1784	155.702	Transcriptionally Active
NM_146238	Gemin8	chrX	162608411	162628444	+	89.6136	5.51193	20.1031	19.4329	19.8181	8.26519	11.1593	0.910423	Transcriptionally Active
NM_007602	Capn5	chr7	105270074	105326703	-	137.867	11.0239	34.2936	50.0396	25.076	17.9079	22.9385	0	Transcriptionally Active
NM_007918	Eif4ebp1	chr8	28370798	28386128	+	1117.3	9.18655	255.428	254.571	213.146	20.663	70.6753	89.6594	Transcriptionally Active
NM_011500	Strn	chr17	79053303	79135900	-	226.906	76.2483	72.726	84.0471	57.0276	22.7293	27.8982	0.475075	Transcriptionally Active
NM_009081	Rpl28	chr7	4744566	4746149	+	661.762	6.43058	370.725	438.211	319.516	11.709	68.8154	0.703137	Transcriptionally Active
NM_001102425	Stx16	chr2	173902551	173925272	+	322.264	4.13395	78.0474	90.3628	58.2409	13.0865	29.758	12.8293	Transcriptionally Active
NM_028814	2810403A07Rik	chr3	88489715	88516855	+	656.018	3.21529	164.964	172.467	124.571	25.4843	38.4375	47.2896	Transcriptionally Active
NM_011137	Pou2f1	chr1	167795284	167932765	-	466.451	10.5645	108.793	175.382	90.1926	26.1731	53.3165	0.57435	Transcriptionally Active
NM_139197	Gbgt1	chr2	28352410	28360935	+	44.2324	10.1052	35.4761	61.2135	37.6139	22.0405	24.7984	0.80243	Transcriptionally Active
NM_145429	Arrb2	chr11	70246081	70254330	+	229.779	19.7511	71.5435	97.6502	56.6231	24.7956	27.2782	6.34047	Transcriptionally Active
NM_153405	Rbm45	chr2	76208040	76221824	+	355.008	8.72722	53.2142	90.3628	48.1297	11.709	23.5584	7.24065	Transcriptionally Active
NM_009906	Tpp1	chr7	112893360	112900721	-	245.863	19.7511	53.2142	96.1927	58.2409	24.7956	39.0574	25.4426	Transcriptionally Active
NM_029384	Tmem238	chr7	4736386	4741162	-	207.375	17.4544	127.123	165.665	98.686	18.5967	37.1975	1.26562	Transcriptionally Active
NM_010726	Phyh	chr2	4840041	4859789	+	85.0181	11.4832	49.6666	98.6218	48.5341	26.1731	24.7984	12.6377	Transcriptionally Active
NM_017382	Rab11a	chr9	64563106	64585563	-	464.727	2.75596	37.2499	84.0471	31.5472	19.2854	24.1784	21.1942	Transcriptionally Active
NM_201388	Plec	chr15	76001403	76038683	-	86.7414	14.6985	48.484	67.0434	29.1205	22.7293	19.2187	0	Transcriptionally Active
NM_146194	Picalm	chr7	97278741	97357957	+	494.024	7.80856	101.698	110.282	84.1258	19.9742	33.4778	0.342524	Transcriptionally Active
NM_027409	Mospd1	chrX	50698197	50723669	-	105.698	9.18655	20.6944	38.3799	19.0092	8.95395	12.3992	4.79543e-05	Transcriptionally Active
NM_019738	Nupr1	chr7	133766759	133768984	-	357.306	10.1052	83.9601	165.665	70.7789	22.7293	40.9173	61.4197	Transcriptionally Active
NM_172495	Ncoa7	chr10	30365387	30522913	-	286.649	18.8324	63.857	96.6785	52.1742	23.418	29.758	0.633181	Transcriptionally Active
NM_008958	Ptch2	chr4	116768960	116787436	+	170.611	17.4544	59.1268	67.0434	55.0053	24.1068	29.758	1.16049	Transcriptionally Active
NM_011666	Uba3	chr6	97133809	97155636	-	361.327	5.51193	105.246	75.7882	86.5525	22.0405	24.1784	0.130591	Transcriptionally Active
NM_009456	Ube2l3	chr16	17152107	17201585	-	399.815	7.34924	75.0911	109.796	62.6899	24.7956	30.9979	12.0342	Transcriptionally Active
NM_018788	Extl3	chr14	65670895	65716943	-	263.671	9.64587	31.3372	29.6351	27.9071	25.4843	26.0383	2.30349	Transcriptionally Active
NM_138755	Phf21a	chr2	92024338	92204823	+	341.221	9.18655	91.6466	54.412	71.9923	37.8821	22.9385	1.04799	Transcriptionally Active
NM_053158	Mrpl1	chr5	96639133	96695728	+	420.495	18.3731	93.4204	70.4441	65.9255	17.2191	44.0171	7.96738	Transcriptionally Active
NM_175118	Dusp28	chr1	94803565	94805197	+	170.611	21.1291	134.809	152.062	110.82	16.5304	30.9979	0.577066	Transcriptionally Active
NM_030205	Coro7	chr16	4626883	4679720	-	136.144	7.34924	56.1705	137.488	48.1297	14.4641	18.5988	6.11134	Transcriptionally Active
NM_001025444	Aptx	chr4	40629110	40650220	-	242.991	4.59327	53.8054	82.5897	57.0276	17.2191	21.0786	1.39612	Transcriptionally Active
NM_133819	Ppp1r15b	chr1	135027742	135036377	+	1111.55	5.0526	185.067	264.773	159.758	18.5967	48.9768	15.3127	Transcriptionally Active
NM_024197	Ndufa10	chr1	94336295	94370335	-	344.668	11.0239	50.8491	81.1322	48.1297	24.7956	26.0383	25.2388	Transcriptionally Active
NM_012012	Exo1	chr1	177810908	177841527	+	329.732	5.97126	76.2736	76.7598	65.9255	8.95395	24.7984	4.78326	Transcriptionally Active
NM_022996	Ndfip1	chr18	38578628	38624060	+	357.306	33.5309	81.0038	52.9546	74.0145	17.9079	28.5181	27.4401	Transcriptionally Active
NM_009214	Sms	chrX	153881885	153929978	-	198.758	27.1003	53.2142	45.1814	42.4673	17.2191	14.879	6.32501	Transcriptionally Active
NM_177319	Zfyve27	chr19	42245056	42269082	+	230.927	21.5884	57.353	69.4725	44.8941	21.3517	19.8387	0.613452	Transcriptionally Active
NM_178367	Dhx33	chr11	70797592	70817934	-	245.863	5.0526	87.5077	78.7031	81.6991	19.2854	23.5584	4.47487	Transcriptionally Active
NM_030066	Armcx1	chrX	131252476	131256451	+	152.228	10.5645	58.5356	136.516	43.2762	6.19889	27.2782	0.735489	Transcriptionally Active
NM_172150	Ift52	chr2	162843207	162871871	+	413.027	4.59327	96.3768	84.0471	84.1258	22.7293	16.7389	23.4132	Transcriptionally Active
NM_008999	Rab23	chr1	33776740	33799409	+	216.566	28.9376	56.1705	138.459	57.8365	18.5967	25.4183	0.742396	Transcriptionally Active
NM_029523	Depdc1a	chr3	159158396	159192919	+	133.272	17.9138	37.8412	33.0359	35.5917	8.95395	23.5584	0.39517	Transcriptionally Active
NM_001040686	Zfp692	chr11	58120570	58128115	+	99.3792	16.9951	47.8927	45.1814	39.2317	16.5304	31.6179	19.6802	Transcriptionally Active
NM_029896	Wdr82	chr9	106073259	106094037	+	849.606	5.51193	241.238	258.457	191.305	18.5967	43.3971	23.3187	Transcriptionally Active
NM_001039493	Plekhm3	chr1	64835694	65003398	-	91.9114	14.6985	35.4761	65.5859	29.9294	20.663	19.8387	0.83034	Transcriptionally Active
NM_027136	Ovca2	chr11	74989444	74992310	-	282.628	12.8612	151.365	176.353	147.625	15.1528	26.6582	5.93329	Transcriptionally Active
NM_022880	Slc29a1	chr17	45722148	45729342	-	141.314	3.21529	183.293	129.229	170.678	20.663	19.2187	8.07301	Transcriptionally Active
NM_018853	Rplp1	chr9	61761089	61762317	-	759.993	0.918655	333.475	347.362	281.902	17.2191	39.0574	185.285	Transcriptionally Active
NM_001039511	Ivns1abp	chr1	153191627	153203928	+	187.844	57.4159	124.166	167.123	99.0905	19.9742	33.4778	4.03516	Transcriptionally Active
NM_027276	Cdc16	chr8	13757689	13781882	+	323.988	12.8612	69.7697	56.3553	57.432	20.663	32.2379	22.6875	Transcriptionally Active
NM_001080964	Sp2	chr11	96814651	96839002	-	363.625	2.75596	141.904	151.091	104.753	19.9742	25.4183	5.35122	Transcriptionally Active
NM_145355	Rnf185	chr11	3315985	3352328	-	517.576	9.64587	81.0038	103.966	73.2056	22.0405	32.2379	0	Transcriptionally Active
NM_013716	G3bp1	chr11	55283253	55314389	+	704.271	1.37798	273.166	255.056	198.99	19.2854	65.0957	33.9492	Transcriptionally Active
NM_025332	Gtpbp8	chr16	44738991	44746476	-	257.352	38.1242	67.9959	75.7882	52.1742	22.0405	26.6582	0.619168	Transcriptionally Active
NM_173866	Gpt2	chr8	88016515	88051457	+	460.132	8.72722	62.6745	64.1285	62.6899	6.88766	34.7177	12.6738	Transcriptionally Active
NM_025965	Ssr1	chr13	38063269	38086059	-	370.518	15.1578	72.1348	82.1039	65.521	16.5304	20.4586	9.56733	Transcriptionally Active
NM_001080128	Rnps1	chr17	24551619	24562842	+	656.592	8.72722	118.254	195.786	103.944	12.3978	52.6965	0	Transcriptionally Active
NM_019747	Zfp113	chr5	138580929	138596972	-	187.844	4.13395	56.1705	122.427	46.9163	13.7753	22.9385	0.692176	Transcriptionally Active
NM_009637	Aebp2	chr6	140572818	140625939	+	518.725	35.3682	185.067	105.423	135.087	20.663	21.0786	0	Transcriptionally Active
NM_028634	Cby1	chr15	79489656	79498090	+	176.93	11.9425	40.7975	75.7882	37.2095	13.0865	29.758	6.12916	Transcriptionally Active
NM_027204	Mrpl12	chr11	120345982	120350068	+	521.597	1.83731	169.103	202.102	149.647	19.9742	32.2379	35.7407	Transcriptionally Active
NM_011897	Spry2	chr14	106291163	106296036	-	2231.15	6.88991	325.198	173.924	266.533	32.372	41.5373	29.7039	Transcriptionally Active
NM_029236	Bcdin3d	chr15	99300514	99305161	-	464.727	5.97126	166.146	188.985	147.22	22.7293	39.6774	7.26773	Transcriptionally Active
NM_177003	9630033F20Rik	chr6	127035133	127059570	-	358.455	13.7798	83.9601	155.463	67.5433	19.2854	24.7984	5.89097	Transcriptionally Active
NM_016716	Cul3	chr1	80263392	80337005	-	284.351	7.80856	98.7418	73.8449	77.2501	10.3315	23.5584	13.7254	Transcriptionally Active
NM_172748	Fbxl19	chr7	134890288	134912442	+	732.994	4.13395	130.079	163.722	104.753	12.3978	45.877	9.24823	Transcriptionally Active
NM_016738	Rpl13	chr8	125626249	125629142	+	723.803	4.13395	328.154	448.413	280.284	19.2854	89.8941	200.057	Transcriptionally Active
NM_026724	Rpl34	chr3	130429748	130433226	-	759.993	2.29664	237.099	227.365	206.27	13.0865	50.8366	5.24802	Transcriptionally Active
NM_011757	Zscan21	chr5	138558132	138575487	+	263.096	3.21529	92.8291	125.828	87.3614	11.0202	33.4778	2.10116	Transcriptionally Active
NM_001080748	Gtf2i	chr5	134713703	134790616	-	496.896	6.88991	238.872	268.659	192.114	19.2854	57.0362	5.51629	Transcriptionally Active
NM_183025	A430033K04Rik	chr5	139064086	139090054	+	137.293	7.80856	28.9722	22.8336	22.6493	15.1528	16.1189	0.899505	Transcriptionally Active
NM_172259	Myl6b	chr10	127931212	127935741	-	112.017	10.5645	76.2736	82.1039	76.4412	15.1528	19.8387	0.752324	Transcriptionally Active
NM_020586	Herpud2	chr9	24912573	24956280	-	326.86	8.26789	95.1942	94.2494	66.7344	24.1068	24.1784	5.81946	Transcriptionally Active
NM_011826	Hax1	chr3	89799378	89802608	-	495.747	2.75596	260.749	387.2	257.231	15.1528	32.2379	3.94848	Transcriptionally Active
NM_013676	Supt5	chr7	29099914	29123738	-	405.559	10.1052	106.428	197.244	88.5747	17.2191	42.1572	24.0757	Transcriptionally Active
NM_144815	Cecr5	chr6	120459511	120481317	-	313.073	40.4208	62.0832	99.1076	55.4098	15.8416	28.5181	7.41196	Transcriptionally Active
NM_025938	Rpp14	chr14	8912826	8924360	+	361.327	11.0239	63.857	113.196	59.8587	19.2854	15.499	9.286	Transcriptionally Active
NM_016898	Cd164	chr10	41239305	41250848	+	502.066	7.80856	163.19	223.478	117.291	15.1528	54.5564	52.4064	Transcriptionally Active
NM_027007	Zfp397	chr18	24113188	24123171	+	332.604	12.4018	90.4641	160.321	92.2148	22.0405	34.7177	5.09851	Transcriptionally Active
NM_145999	Rhot2	chr17	25975782	25981796	-	164.292	2.75596	78.6387	85.0188	65.9255	16.5304	33.4778	8.96135	Transcriptionally Active
NM_007791	Csrp1	chr1	137625773	137648806	+	105.124	40.8801	40.2063	60.7277	40.4451	22.0405	22.3185	13.0453	Transcriptionally Active
NM_026532	Nutf2	chr8	108384533	108404301	+	692.208	1.83731	160.825	185.584	148.433	17.9079	22.3185	3.258	Transcriptionally Active
NM_199299	Phf15	chr11	51626957	51670983	-	241.842	46.8514	101.107	105.423	82.9124	39.2596	22.9385	0.511417	Transcriptionally Active
NM_001042659	Fzd5	chr1	64777131	64784324	-	504.364	18.8324	206.944	243.397	168.656	27.5506	22.3185	5.5596	Transcriptionally Active
NM_023132	Renbp	chrX	71167459	71176189	-	264.245	3.21529	61.4919	109.31	48.5341	8.95395	22.3185	48.8124	Transcriptionally Active
NM_145836	Irf2bpl	chr12	88221652	88225764	-	598.573	20.6697	265.48	278.862	192.923	18.5967	38.4375	8.34862	Transcriptionally Active
NM_029397	Rbm12	chr2	155920617	155937701	-	465.876	3.21529	111.158	119.026	94.6415	14.4641	30.378	2.59634	Transcriptionally Active
NM_146099	Wbp1l	chr19	46673595	46731879	+	217.715	5.0526	80.4125	79.1889	63.9032	13.0865	17.9788	0.00205308	Transcriptionally Active
NM_008095	Gbas	chr5	130230949	130264201	+	227.481	19.2917	94.603	89.3912	58.2409	27.5506	30.9979	11.8562	Transcriptionally Active
NM_001081256	Kdm3b	chr18	34936661	34999024	+	522.172	5.51193	100.516	113.682	69.5656	18.5967	25.4183	10.303	Transcriptionally Active
NM_020566	Dnajc4	chr19	7062400	7066762	-	107.996	11.4832	79.23	136.03	74.8234	13.7753	25.4183	10.1706	Transcriptionally Active
NM_019437	Rfk	chr19	17468532	17475839	+	260.799	52.8226	50.2578	50.0396	42.4673	16.5304	21.6986	8.55433	Transcriptionally Active
NM_201396	Sall4	chr2	168573831	168592701	-	943.816	16.9951	273.757	342.504	207.888	29.6169	44.0171	21.1719	Transcriptionally Active
NM_001033291	Usp40	chr1	89841695	89905126	-	98.8048	39.5022	30.746	29.6351	29.1205	12.3978	24.1784	2.86407	Transcriptionally Active
NM_029576	Rab1b	chr19	5099206	5106996	-	238.97	5.51193	83.3689	42.2665	59.0498	15.1528	21.6986	12.2476	Transcriptionally Active
NM_030208	Trmt44	chr5	35898857	35917719	-	405.559	4.13395	105.837	142.346	91.0015	13.0865	31.6179	1.98412	Transcriptionally Active
NM_021513	Thap11	chr8	108379002	108380850	+	329.732	9.64587	86.3252	73.3591	68.7567	19.9742	27.8982	6.32649	Transcriptionally Active
NM_001044383	Ubtf	chr11	102165873	102178601	-	757.12	2.29664	330.519	168.094	262.489	37.8821	21.6986	14.9386	Transcriptionally Active
NM_008452	Klf2	chr8	74842960	74845553	+	1107.53	9.64587	773.97	951.239	635.797	19.2854	89.2741	44.1651	Transcriptionally Active
NM_023742	Dtx2	chr5	136470669	136508751	+	126.953	13.7798	41.3888	34.4933	29.9294	24.1068	21.0786	0.242086	Transcriptionally Active
NM_029418	9130401M01Rik	chr15	57853826	57865849	-	209.673	10.5645	65.0395	52.9546	51.3653	23.418	30.378	14.4732	Transcriptionally Active
NM_001079830	Trim33	chr3	103083215	103162691	+	365.348	2.75596	111.158	206.96	89.3836	24.7956	22.3185	0.0153965	Transcriptionally Active
NM_013736	Tceb3	chr4	135559284	135577564	-	248.161	17.9138	56.1705	70.4441	53.792	21.3517	17.3589	3.30373	Transcriptionally Active
NM_009682	Ap3s2	chr7	87020210	87065526	-	274.011	9.64587	79.23	104.452	48.9386	27.5506	27.2782	5.62043	Transcriptionally Active
NM_029832	Ddrgk1	chr2	130479818	130490381	-	133.846	7.80856	79.23	186.556	66.3299	35.8158	62.6159	10.8029	Transcriptionally Active
NM_001001981	Utp14b	chr1	78654399	78664176	+	315.371	34.9089	91.0553	97.6502	69.97	26.1731	29.1381	0.614691	Transcriptionally Active
NM_001033496	Zfp213	chr17	23693733	23701193	-	332.03	4.13395	103.472	76.274	85.7436	12.3978	26.6582	1.67158	Transcriptionally Active
NM_025387	Tmem14c	chr13	41111618	41117951	+	80.4225	6.43058	157.277	169.552	152.478	25.4843	37.1975	18.8458	Transcriptionally Active
NM_025919	Rpl11	chr4	135605862	135609286	-	730.121	16.9951	217.587	175.867	180.385	10.3315	45.257	16.4508	Transcriptionally Active
NM_177712	Zfp874a	chr13	67541366	67552560	-	51.7002	8.26789	33.7023	46.6389	25.4804	22.7293	22.3185	3.57716	Transcriptionally Active
NM_026515	2810417H13Rik	chr9	65738129	65751358	+	167.164	30.3156	30.1547	51.4971	34.3783	18.5967	25.4183	0.851023	Transcriptionally Active
NM_027315	Ube2q1	chr3	89577530	89587919	+	442.324	4.59327	147.226	171.009	143.58	26.8619	22.3185	15.1707	Transcriptionally Active
NM_172941	Zkscan17	chr11	59299022	59320142	-	453.813	18.8324	109.385	238.053	95.4504	38.5709	35.9576	0.566402	Transcriptionally Active
NM_020570	Xrcc2	chr5	25195633	25211615	-	336.626	5.0526	51.4404	105.423	47.7252	16.5304	15.499	2.94856	Transcriptionally Active
NM_028712	Rap2b	chr3	61168428	61172625	+	454.962	17.9138	152.547	247.283	111.224	17.9079	47.7368	3.558	Transcriptionally Active
NM_023670	Igf2bp3	chr6	49035216	49164953	-	294.691	62.0092	112.932	122.427	91.0015	34.4383	34.0977	6.48962	Transcriptionally Active
NM_008466	Kpna3	chr14	61984022	62058784	-	266.543	8.72722	42.5713	37.8941	32.3561	21.3517	19.2187	11.9636	Transcriptionally Active
NM_025463	1810009A15Rik	chr19	8963392	8965230	+	669.23	3.67462	670.498	541.691	605.867	11.709	50.2167	62.2863	Transcriptionally Active
NM_029094	Pik3cb	chr9	98938820	99040630	-	265.394	25.263	61.4919	58.2986	57.8365	22.7293	14.2591	5.11615	Transcriptionally Active
NM_175143	Qrich1	chr9	108419417	108462498	+	400.964	4.59327	203.988	203.073	169.465	14.4641	53.3165	18.7327	Transcriptionally Active
NM_153787	Bclaf1	chr10	20032274	20062307	+	642.231	4.13395	205.17	201.13	173.509	17.9079	64.4757	6.4871	Transcriptionally Active
NM_198308	Pdpr	chr8	113618644	113659044	+	95.3581	31.6936	32.5198	46.6389	30.7383	15.8416	16.7389	0.229393	Transcriptionally Active
NM_001098476	Grsf1	chr5	89088261	89104605	-	311.35	41.3395	50.8491	36.4366	48.5341	18.5967	22.9385	14.7981	Transcriptionally Active
NM_017470	Dnal4	chr15	79591878	79604897	-	177.504	8.26789	49.6666	99.1076	35.1872	23.418	14.2591	5.3845	Transcriptionally Active
NM_025835	Pccb	chr9	100882456	100935294	-	109.719	22.0477	91.0553	137.002	67.1388	13.7753	30.9979	5.83533	Transcriptionally Active
NM_009743	Bcl2l1	chr2	152606403	152657418	-	357.306	21.1291	102.289	109.796	74.0145	13.7753	29.1381	7.02167	Transcriptionally Active
NM_134437	Il17rd	chr14	27852186	27920472	+	479.088	6.88991	124.166	177.811	90.1926	14.4641	17.3589	3.34966	Transcriptionally Active
NM_026069	Rpl37	chr15	5066612	5069140	+	982.303	3.21529	260.749	382.827	225.279	22.0405	58.8961	98.881	Transcriptionally Active
NM_008575	Mdm4	chr1	134886421	134921925	-	341.221	2.29664	66.2221	88.9054	52.5786	11.0202	20.4586	0.216009	Transcriptionally Active
NM_023871	Set	chr2	29917515	29928097	+	886.371	3.21529	226.456	372.625	203.843	20.663	53.3165	6.0529	Transcriptionally Active
NM_011623	Top2a	chr11	98854260	98885503	-	711.165	5.97126	157.869	213.276	144.793	15.8416	40.2973	33.9458	Transcriptionally Active
NM_023243	Ccnh	chr13	85329081	85353328	+	228.055	5.0526	49.6666	86.9621	46.5119	14.4641	18.5988	14.2091	Transcriptionally Active
NM_008893	Pola2	chr19	5940542	5964206	-	417.048	8.26789	89.8728	121.941	76.4412	18.5967	26.0383	12.4215	Transcriptionally Active
NM_172536	Zfp609	chr9	65539389	65675371	-	335.477	22.9664	72.1348	117.083	68.7567	14.4641	27.2782	2.47926	Transcriptionally Active
NM_011252	Rbmx	chrX	54639206	54646213	-	318.243	11.9425	40.2063	58.2986	34.7828	6.19889	17.9788	0.463363	Transcriptionally Active
NM_013611	Nodal	chr10	60880719	60888085	+	564.681	10.1052	151.956	236.109	135.896	24.1068	58.2761	12.9296	Transcriptionally Active
NM_028617	Mvb12a	chr8	74066828	74071925	+	185.546	11.9425	35.4761	73.3591	34.7828	20.663	14.879	14.1762	Transcriptionally Active
NM_145428	Dhrs7b	chr11	60644132	60671925	+	294.691	9.18655	62.0832	132.143	69.1611	19.2854	31.6179	9.7575	Transcriptionally Active
NM_146153	Thrap3	chr4	125841326	125879954	-	602.594	6.88991	125.349	117.569	121.335	35.8158	32.8578	4.53772	Transcriptionally Active
NM_020614	Taf1b	chr12	25183445	25243436	+	24.1268	2.29664	17.7381	51.4971	20.2225	4.82136	6.19959	5.66548	Transcriptionally Active
NM_133740	Prmt3	chr7	57033727	57113635	+	74.1036	5.0526	111.75	83.5613	84.1258	8.95395	20.4586	17.5162	Transcriptionally Active
NM_173780	Klf8	chrX	149672587	149830677	+	86.167	6.43058	26.6071	50.5255	27.5027	3.44383	6.81955	2.06844	Transcriptionally Active
NM_009357	Tex261	chr6	83720407	83725806	-	244.714	6.88991	59.1268	90.8487	45.703	22.0405	16.7389	4.68697	Transcriptionally Active
NM_145630	Pdk3	chrX	91009954	91077434	-	108.57	22.0477	29.5634	43.2381	21.4359	13.0865	22.9385	2.3672	Transcriptionally Active
NM_016760	Clta	chr4	44025514	44045718	+	665.783	4.59327	203.988	222.992	192.923	17.2191	37.8175	0	Transcriptionally Active
NM_025936	Rars	chr11	35621882	35648030	-	426.814	4.59327	101.698	100.565	106.775	17.9079	34.0977	34.8316	Transcriptionally Active
NM_022011	Gtf2h2	chr13	101238531	101262564	-	284.351	11.0239	41.9801	57.327	35.1872	13.7753	29.758	19.989	Transcriptionally Active
NM_027215	Tmem147	chr7	31512719	31514553	-	283.202	6.88991	75.6824	124.856	62.6899	19.2854	32.2379	46.915	Transcriptionally Active
NM_024209	Ppp6c	chr2	39052317	39081858	-	147.633	4.59327	46.7102	68.5009	47.3208	12.3978	14.879	12.5557	Transcriptionally Active
NM_145743	Lace1	chr10	42032390	42198371	-	248.735	5.97126	71.5435	64.1285	71.1834	17.9079	24.7984	3.98734	Transcriptionally Active
NM_013882	Gtse1	chr15	85690375	85707003	+	781.822	7.34924	130.67	195.3	116.886	14.4641	26.0383	16.2451	Transcriptionally Active
NM_028049	Fbxo22	chr9	55056741	55072240	+	360.752	6.43058	157.277	169.552	148.838	25.4843	32.8578	36.864	Transcriptionally Active
NM_001044703	Zscan21	chr5	138558132	138575487	+	263.096	3.21529	92.8291	125.828	87.3614	11.0202	33.4778	1.41424	Transcriptionally Active
NM_030561	BC004004	chr17	29405732	29439832	+	229.204	9.18655	60.3094	72.8732	52.9831	18.5967	17.3589	5.54755	Transcriptionally Active
NM_023431	Mum1	chr10	79689342	79707889	+	199.907	20.6697	70.9522	98.136	68.7567	26.1731	21.6986	8.72258	Transcriptionally Active
NM_134125	Trip10	chr17	57388873	57403120	+	540.554	1.83731	109.976	162.75	79.6768	19.9742	19.8387	0.00116818	Transcriptionally Active
NM_001001152	Zfp458	chr13	67355853	67370004	-	36.7646	6.88991	21.2857	37.8941	16.5825	8.26519	8.05947	0.163472	Transcriptionally Active
NM_009609	Actg1	chr11	120207003	120209798	-	529.64	3.21529	357.126	322.1	289.587	15.1528	65.7157	0.146535	Transcriptionally Active
NM_025456	Eapp	chr12	55774453	55796852	-	302.733	7.80856	282.035	215.219	225.279	18.5967	127.092	16.9536	Transcriptionally Active
NM_172372	Wdr45	chrX	7299374	7305327	+	785.843	3.67462	91.0553	88.4195	72.3967	6.19889	19.2187	1.87662	Transcriptionally Active
NM_025272	Atp6v0e	chr17	26813340	26836591	+	241.842	10.1052	63.2657	148.661	59.8587	15.1528	25.4183	52.7426	Transcriptionally Active
NM_001042514	Txnrd1	chr10	82323085	82360469	+	780.673	5.51193	105.837	222.506	86.148	24.7956	64.4757	0	Transcriptionally Active
NM_025881	Luc7l	chr17	26389854	26417675	+	600.297	1.83731	117.071	142.346	113.246	9.64272	53.9364	37.0438	Transcriptionally Active
NM_027485	Med26	chr8	75018457	75072209	-	558.936	5.0526	92.2379	74.8165	78.8679	15.1528	24.1784	3.23345	Transcriptionally Active
NM_030236	Fbxo34	chr14	48092235	48151637	+	216.566	19.2917	39.615	36.4366	28.716	13.0865	29.758	0.701403	Transcriptionally Active
NM_133816	Sh3bp4	chr1	90967036	91050368	+	363.625	16.9951	52.6229	109.796	47.3208	12.3978	30.9979	2.07139	Transcriptionally Active
NM_023429	Ociad1	chr5	73684032	73705316	+	431.984	16.0765	92.2379	113.196	78.059	29.6169	41.5373	58.0289	Transcriptionally Active
NM_008783	Pbx1	chr1	170049494	170362389	-	83.2947	64.7652	23.6507	14.0888	16.5825	19.2854	14.879	0.0890802	Transcriptionally Active
NM_028677	Ppih	chr4	118972614	118993128	-	427.388	6.88991	103.472	149.147	89.3836	13.0865	33.4778	24.0668	Transcriptionally Active
NM_019773	Rab9	chrX	162895183	162917799	-	218.29	4.13395	48.484	69.4725	43.6807	5.51012	11.7792	8.45727	Transcriptionally Active
NM_139141	Zkscan8	chr13	21605089	21622983	-	170.036	20.6697	56.7618	44.6956	58.6454	26.8619	39.6774	0	Transcriptionally Active
NM_015782	Snrpa	chr7	27972024	27981290	-	550.32	3.67462	143.087	164.208	132.66	12.3978	37.1975	10.155	Transcriptionally Active
NM_028447	Prrc1	chr18	57514386	57552373	+	107.421	44.5548	29.5634	33.0359	20.627	16.5304	21.0786	4.3665	Transcriptionally Active
NM_009193	Slbp	chr5	33982710	33994955	-	322.839	2.75596	167.92	368.253	166.634	24.1068	35.9576	4.70198	Transcriptionally Active
NM_023133	Rps19	chr7	25669732	25674821	+	907.051	3.21529	341.753	328.901	314.663	17.2191	57.6562	51.1138	Transcriptionally Active
NM_010792	Mettl1	chr10	126478987	126482517	+	332.03	24.8037	73.9086	133.115	77.2501	19.9742	19.8387	10.6793	Transcriptionally Active
NM_007842	Dhx9	chr1	155302887	155334790	-	1013.9	2.29664	278.487	363.395	239.435	15.8416	58.2761	46.847	Transcriptionally Active
NM_001039934	Map2	chr1	66221902	66489157	+	54.5724	46.8514	27.7896	48.0963	19.8181	17.9079	14.879	2.69767e-05	Transcriptionally Active
NM_021876	Eed	chr7	97103163	97129486	-	1055.26	6.88991	240.055	190.928	199.799	20.663	53.9364	71.0356	Transcriptionally Active
NM_024433	Mtap	chr4	88783273	88826994	+	262.522	28.9376	52.0316	73.3591	40.0406	38.5709	22.9385	7.17341	Transcriptionally Active
NM_029665	Ipo11	chr13	107584518	107726995	-	477.939	6.88991	67.4046	96.1927	48.1297	19.9742	25.4183	7.50449	Transcriptionally Active
NM_153059	Tmem5	chr10	121518315	121534158	-	183.823	24.3443	68.5871	102.023	58.2409	18.5967	22.9385	7.80113	Transcriptionally Active
NM_172256	Dync2li1	chr17	85025838	85054904	+	97.0815	34.9089	27.1983	20.4045	27.0982	20.663	14.2591	4.70189	Transcriptionally Active
NM_027890	Susd2	chr10	75099363	75106753	-	62.6147	4.59327	123.575	217.162	111.224	21.3517	25.4183	3.57369	Transcriptionally Active
NM_172757	Heatr3	chr8	90661783	90695842	+	222.885	8.26789	107.02	125.828	91.8104	18.5967	23.5584	7.94039	Transcriptionally Active
NM_145541	Rap1a	chr3	105530177	105604299	-	131.548	30.7749	36.0674	63.6426	34.7828	23.418	23.5584	3.55181	Transcriptionally Active
NM_011295	Rps12	chr10	23504988	23507015	-	1310.89	5.51193	464.737	517.886	425.482	13.0865	89.2741	3.92493	Transcriptionally Active
NM_152824	Rbm17	chr2	11507065	11524826	-	336.051	5.97126	65.0395	70.4441	57.432	24.1068	24.1784	28.9765	Transcriptionally Active
NM_139144	Ogt	chrX	98835402	98879690	+	545.724	28.9376	75.0911	75.7882	71.5878	3.44383	20.4586	0.856004	Transcriptionally Active
NM_199042	Thap1	chr8	27268640	27274623	+	418.771	5.51193	181.519	174.896	162.589	21.3517	40.9173	4.06217	Transcriptionally Active
NM_033617	Atp6v0b	chr4	117556934	117559934	-	236.672	11.9425	146.635	137.488	128.211	19.2854	33.4778	89.9431	Transcriptionally Active
NM_010892	Nek2	chr1	193645351	193656928	+	253.331	11.9425	111.158	136.03	61.4765	16.5304	46.4969	6.60859	Transcriptionally Active
NM_008254	Hmgcl	chr4	135502367	135518532	+	200.482	13.7798	70.3609	90.3628	60.6676	13.0865	24.7984	9.55485	Transcriptionally Active
NM_001048146	Azi2	chr9	117949616	117969602	+	193.014	26.1817	49.6666	75.3024	36.805	14.4641	23.5584	0.963259	Transcriptionally Active
NM_001081400	1810013L24Rik	chr16	8830192	8859017	+	751.376	4.59327	175.607	178.782	137.109	22.0405	47.7368	14.0225	Transcriptionally Active
NM_021366	Klf13	chr7	71031236	71083801	-	763.439	0.918655	188.615	177.811	140.344	20.663	37.1975	1.90121	Transcriptionally Active
NM_019883	Uba52	chr8	73032164	73034266	-	924.284	2.75596	405.61	448.899	385.442	12.3978	43.3971	1.5575	Transcriptionally Active
NM_030037	Mospd3	chr5	138037874	138042268	-	390.049	3.21529	93.4204	192.871	74.419	16.5304	32.8578	0.820491	Transcriptionally Active
NM_016723	Uchl3	chr14	102053183	102095342	+	380.858	19.7511	56.1705	91.8203	38.8273	21.3517	19.8387	28.7259	Transcriptionally Active
NM_019912	Ube2d2a	chr18	35931212	35966826	+	263.096	5.51193	89.8728	88.9054	71.9923	14.4641	23.5584	8.17015	Transcriptionally Active
NM_001081280	Nlrc3	chr16	3946932	3976632	-	53.4235	4.13395	62.6745	121.455	67.1388	16.5304	15.499	0.0199221	Transcriptionally Active
NM_175255	Sec24a	chr11	51505764	51570336	-	400.389	16.9951	67.9959	156.92	59.8587	21.3517	34.7177	1.96808	Transcriptionally Active
NM_001081975	Mfap1b	chr2	121287401	121299759	-	95.9326	2.29664	36.6586	38.8657	31.1427	6.19889	11.7792	0.196192	Transcriptionally Active
NM_201244	Copg1	chr6	87837965	87840753	+	291.244	3.21529	49.0753	100.079	44.4896	19.9742	23.5584	0.791268	Transcriptionally Active
NM_009771	Btrc	chr19	45438223	45607833	+	221.162	11.0239	26.0158	68.5009	32.7605	20.663	15.499	2.48674	Transcriptionally Active
NM_001081373	Cep164	chr9	45575028	45636721	-	119.485	14.6985	39.615	29.6351	26.2893	11.709	17.3589	3.32998	Transcriptionally Active
NM_021310	Jmy	chr13	94200051	94269763	-	303.308	26.641	73.3173	85.9904	69.97	18.5967	26.6582	2.1387	Transcriptionally Active
NM_025722	4921524J17Rik	chr8	87932657	87956740	-	269.99	27.5596	72.726	53.9262	71.1834	20.663	22.3185	5.1161	Transcriptionally Active
NM_016684	Zscan12	chr13	21454688	21464171	+	174.057	14.6985	70.3609	62.1852	52.5786	15.1528	19.8387	2.24439	Transcriptionally Active
NM_024233	Rexo2	chr9	48276618	48288716	-	225.757	42.2581	65.6308	50.5255	47.7252	14.4641	26.6582	14.7698	Transcriptionally Active
NM_009674	Anxa7	chr14	21274482	21299355	-	264.245	8.26789	94.0117	194.814	85.3391	17.2191	21.6986	0	Transcriptionally Active
NM_026302	Dctn4	chr18	60685874	60718416	+	296.989	12.4018	96.968	169.552	76.8457	12.3978	25.4183	7.95351	Transcriptionally Active
NM_183172	Ric8b	chr10	84380357	84481082	+	333.753	24.3443	44.3451	51.4971	39.6362	26.1731	19.2187	0.313026	Transcriptionally Active
NM_001033379	Dcp1b	chr6	119125270	119171632	+	222.311	18.8324	50.8491	50.0396	44.8941	27.5506	21.6986	1.35566	Transcriptionally Active
NM_029585	Det1	chr7	85972359	85992097	-	190.142	16.5358	60.9007	78.2173	65.1166	13.7753	29.1381	2.5429	Transcriptionally Active
NM_025983	Atp5e	chr2	174286575	174289602	-	339.498	2.29664	149.591	154.977	140.749	14.4641	27.2782	110.201	Transcriptionally Active
NM_172671	Lgr4	chr2	109757803	109854414	+	408.431	7.34924	94.603	123.885	80.0813	16.5304	35.3377	8.32694	Transcriptionally Active
NM_001042491	Anapc5	chr5	123237469	123271348	-	220.013	3.67462	97.5593	95.221	69.97	22.0405	25.4183	6.11875	Transcriptionally Active
NM_153389	Atp10d	chr5	72594581	72689997	+	93.6348	19.2917	53.8054	77.2456	36.4006	16.5304	16.1189	1.19964	Transcriptionally Active
NM_026670	Zmym1	chr4	126724337	126738376	-	463.004	4.13395	89.8728	94.2494	80.4857	13.0865	32.2379	10.8822	Transcriptionally Active
NM_172142	Nfkbid	chr7	31208322	31213765	+	325.137	29.397	94.0117	162.264	87.3614	22.7293	29.1381	2.26269	Transcriptionally Active
NM_025849	3110001D03Rik	chr4	74923257	74924190	-	139.016	15.1578	65.6308	34.0075	65.1166	18.5967	29.1381	27.105	Transcriptionally Active
NM_024222	Stt3b	chr9	115151699	115219539	-	507.236	15.6171	162.008	180.24	113.246	15.8416	52.0766	16.4438	Transcriptionally Active
NM_027045	Ccser2	chr14	37688121	37781950	-	167.738	12.4018	55.5792	68.5009	36.4006	8.95395	20.4586	0.238146	Transcriptionally Active
NM_027207	1600002K03Rik	chr10	79635688	79637864	+	130.974	12.4018	300.956	327.444	269.364	19.2854	23.5584	7.73313	Transcriptionally Active
NM_027264	Zfp715	chr7	50551892	50568631	-	315.946	17.9138	54.3967	92.7919	42.0629	17.2191	22.9385	3.85435	Transcriptionally Active
NM_019880	Mtch1	chr17	29469020	29484849	-	326.286	3.21529	69.1784	97.1643	60.2632	17.9079	19.8387	14.4967	Transcriptionally Active
NM_009433	Tspyl1	chr10	34001995	34004691	+	377.411	3.67462	86.3252	99.1076	81.6991	22.0405	19.8387	8.26761	Transcriptionally Active
NM_198420	Arhgap39	chr15	76554414	76648600	-	269.99	14.2391	54.3967	103.966	47.3208	14.4641	20.4586	1.20752	Transcriptionally Active
NM_175546	Wdfy2	chr14	63456526	63575723	+	232.076	20.6697	27.1983	20.8903	24.2671	29.6169	26.6582	0.434013	Transcriptionally Active
NM_009480	Usf1	chr1	173341811	173348873	+	428.537	5.51193	88.6903	123.399	87.7658	12.3978	45.257	5.05372	Transcriptionally Active
NM_025677	Tsen15	chr1	154217865	154233812	-	155.101	32.1529	26.0158	42.2665	27.9071	19.2854	17.9788	4.97697	Transcriptionally Active
NM_054057	Prosc	chr8	28153026	28166604	+	369.944	7.34924	96.3768	135.544	101.517	14.4641	26.0383	11.992	Transcriptionally Active
NM_145760	Arfgap1	chr2	180701929	180717229	+	399.24	9.64587	111.75	150.119	87.3614	14.4641	32.2379	2.23004	Transcriptionally Active
NM_026382	Snrnp48	chr13	38296807	38319532	+	359.029	11.4832	86.9165	101.051	67.1388	17.2191	18.5988	37.3914	Transcriptionally Active
NM_181734	Ttpal	chr2	163428049	163444749	+	142.463	15.6171	58.5356	85.5046	38.8273	11.0202	22.9385	2.34798	Transcriptionally Active
NM_007834	Dscr3	chr16	94719330	94748236	-	461.855	4.13395	164.373	227.85	124.166	17.9079	32.2379	9.41606	Transcriptionally Active
NM_145382	Fam193b	chr13	55640676	55672481	-	386.602	8.72722	53.2142	99.1076	44.4896	23.418	22.3185	15.3741	Transcriptionally Active
NM_175152	Thap3	chr4	151356746	151363095	-	237.246	14.6985	95.1942	126.799	97.8771	17.2191	21.6986	6.49622	Transcriptionally Active
NM_027379	Far1	chr7	120657375	120713972	+	337.2	25.7223	70.9522	84.0471	63.4988	17.9079	21.0786	15.3714	Transcriptionally Active
NM_145618	Narg2	chr9	69245804	69280881	+	229.779	24.3443	50.8491	96.1927	45.2985	19.9742	25.4183	5.5497	Transcriptionally Active
NM_145462	Haus4	chr14	55160621	55173198	-	236.097	18.8324	69.7697	81.618	52.1742	15.1528	38.4375	7.81723	Transcriptionally Active
NM_173737	8430410A17Rik	chr6	87863969	87886607	+	566.404	2.29664	172.059	198.701	169.869	22.0405	24.7984	72.4641	Transcriptionally Active
NM_031494	Zfp275	chrX	70587958	70604419	+	110.294	16.0765	23.6507	21.3762	21.8403	4.82136	14.2591	2.18378	Transcriptionally Active
NM_144870	Ndufs8	chr19	3908862	3912774	-	341.221	2.29664	104.655	239.996	103.944	15.8416	27.2782	1.75929	Transcriptionally Active
NM_025650	Uqcr11	chr10	79865741	79869566	-	388.9	1.37798	186.841	253.113	173.105	15.8416	23.5584	59.7293	Transcriptionally Active
NM_145940	Wipi1	chr11	109434834	109472703	-	144.761	53.7413	28.3809	42.7523	28.3116	14.4641	24.1784	1.7911	Transcriptionally Active
NM_024178	Alg14	chr3	120994734	121064929	+	237.821	9.64587	75.0911	108.338	58.6454	21.3517	16.7389	3.85272	Transcriptionally Active
NM_026521	Zfp706	chr15	36926781	36937157	-	649.699	4.59327	244.194	228.822	204.248	15.1528	35.3377	12.3127	Transcriptionally Active
NM_016812	Banp	chr8	124474432	124553158	+	491.726	1.83731	151.956	217.162	149.647	10.3315	21.0786	1.1459	Transcriptionally Active
NM_001081225	Fam178a	chr19	45005608	45058277	+	339.498	7.80856	101.698	137.973	78.059	18.5967	20.4586	5.97704	Transcriptionally Active
NM_198101	Gmip	chr8	72332585	72345769	+	47.1046	18.8324	174.424	167.123	169.465	17.2191	30.378	1.49832	Transcriptionally Active
NM_172503	Zswim4	chr8	86734840	86760941	-	179.802	5.51193	52.0316	113.196	38.8273	17.9079	29.758	1.73414	Transcriptionally Active
NM_145405	Ubl4	chrX	71611056	71613887	-	101.677	5.0526	53.8054	77.7315	46.5119	9.64272	18.5988	6.81976	Transcriptionally Active
NM_016805	Hnrnpu	chr1	180258430	180267915	-	1025.96	2.29664	387.872	240.482	297.271	17.9079	69.4354	81.0804	Transcriptionally Active
NM_007475	Rplp0	chr5	116009475	116013738	+	453.238	6.43058	269.618	232.709	243.075	16.5304	59.5161	148.099	Transcriptionally Active
NM_013493	Cnbp	chr6	87792608	87801100	-	719.781	3.67462	221.726	254.571	187.665	19.9742	44.637	65.0748	Transcriptionally Active
NM_026579	D10Wsu102e	chr10	82822965	82831580	+	319.967	6.43058	81.0038	160.807	57.8365	14.4641	32.2379	5.27286	Transcriptionally Active
NM_009555	Zfp40	chr17	23310835	23330195	-	101.103	36.2869	23.0595	13.603	23.8626	19.9742	21.6986	1.46012	Transcriptionally Active
NM_008927	Map2k1	chr9	64033599	64101412	-	380.284	1.83731	85.7339	112.225	77.2501	14.4641	39.0574	19.1197	Transcriptionally Active
NM_001083958	Zfp655	chr5	145992583	145999191	+	593.978	1.83731	162.008	276.433	135.896	19.2854	48.9768	3.04718	Transcriptionally Active
NM_178760	Gpr107	chr2	31007835	31072087	+	432.558	4.13395	59.1268	104.937	53.3875	22.0405	27.8982	8.73233	Transcriptionally Active
NM_009391	Ran	chr5	129526030	129530196	+	796.183	3.21529	282.626	311.898	242.266	12.3978	54.5564	20.6016	Transcriptionally Active
NM_001037737	Arnt	chr3	95238311	95301161	+	341.796	7.80856	54.3967	108.338	58.2409	14.4641	20.4586	3.69837	Transcriptionally Active
NM_001081093	Arfip1	chr3	84299985	84386547	-	326.86	51.4447	47.3015	42.2665	45.2985	16.5304	22.9385	0.659566	Transcriptionally Active
NM_007646	Cd38	chr5	44260065	44303613	+	114.315	6.88991	78.6387	181.697	76.4412	17.2191	28.5181	3.75781	Transcriptionally Active
NM_024439	Vimp	chr7	73224534	73234291	+	167.164	14.2391	108.793	99.5934	92.6193	19.9742	32.2379	12.0343	Transcriptionally Active
NM_172965	Sap130	chr18	31794036	31882715	+	531.363	12.8612	80.4125	80.6464	74.8234	19.9742	37.8175	8.00834	Transcriptionally Active
NM_172950	Lpin1	chr12	16542474	16596576	-	151.654	12.4018	32.5198	51.9829	25.076	15.8416	21.6986	1.84685	Transcriptionally Active
NM_007996	Fdx1	chr9	51751411	51771638	-	144.761	55.5786	31.3372	63.6426	35.1872	16.5304	26.0383	6.2709	Transcriptionally Active
NM_001001187	Zfp738	chr13	67768377	67784449	-	28.7223	1.83731	18.9206	48.5822	22.6493	10.3315	8.05947	1.21021	Transcriptionally Active
NM_030255	Apobec3	chr15	79722837	79738859	+	452.664	8.72722	162.599	176.353	149.647	17.2191	33.4778	7.14521	Transcriptionally Active
NM_008850	Pitpna	chr11	75401609	75442280	+	167.164	16.0765	61.4919	86.4763	61.881	15.1528	26.6582	6.99651	Transcriptionally Active
NM_026438	Ppa1	chr10	61111368	61136913	+	241.268	21.1291	101.698	163.722	73.6101	16.5304	37.1975	29.0415	Transcriptionally Active
NM_010613	Khsrp	chr17	57160471	57170930	-	504.938	4.59327	204.579	238.538	165.016	21.3517	44.0171	12.7324	Transcriptionally Active
NM_016858	Rab33b	chr3	51287887	51300134	+	332.03	21.1291	95.1942	180.24	69.1611	15.8416	26.6582	1.59218	Transcriptionally Active
NM_183034	Plekhm1	chr11	103226405	103273978	-	384.305	5.0526	80.4125	85.9904	59.4543	9.64272	34.0977	4.82318	Transcriptionally Active
NM_001081419	Dip2a	chr10	75725793	75808036	-	168.313	67.5211	53.8054	56.3553	47.3208	13.0865	22.3185	1.39008	Transcriptionally Active
NM_173747	Gpkow	chrX	7274259	7287385	+	490.577	12.8612	17.7381	22.3478	16.9869	8.26519	6.19959	9.08295	Transcriptionally Active
NM_023060	Eefsec	chr6	88207327	88396533	-	217.715	8.26789	67.4046	156.435	58.6454	13.0865	22.3185	2.80259	Transcriptionally Active
NM_029850	Bcl7a	chr5	123794456	123824092	+	344.093	32.1529	74.4998	90.8487	82.1035	21.3517	25.4183	5.4758	Transcriptionally Active
NM_172627	Pggt1b	chr18	46399602	46440504	-	280.904	7.34924	81.595	114.654	75.6323	11.709	32.2379	2.10358	Transcriptionally Active
NM_172882	Wdfy3	chr5	102261971	102498940	-	279.755	27.1003	50.8491	102.023	52.9831	39.2596	23.5584	2.96498	Transcriptionally Active
NM_010832	Msl3	chrX	165092049	165111834	-	106.273	38.1242	25.4245	34.4933	16.9869	8.26519	15.499	2.35856	Transcriptionally Active
NM_001081128	Mtr	chr13	12278806	12350380	-	272.862	9.64587	30.746	53.9262	32.3561	22.7293	24.7984	1.8817	Transcriptionally Active
NM_010914	Nfyb	chr10	82211444	82226886	-	259.65	8.72722	137.174	138.945	105.966	15.1528	31.6179	17.6013	Transcriptionally Active
NM_026682	Cpsf4l	chr11	113559484	113570840	-	222.885	13.7798	259.567	341.047	205.057	27.5506	34.7177	7.86506	Transcriptionally Active
NM_029794	Cpsf4l	chr11	113559484	113571331	-	214.269	13.3205	248.333	297.323	198.585	24.1068	35.3377	3.9984	Transcriptionally Active
NM_054056	Pawr	chr10	107769244	107851447	+	414.176	26.641	83.3689	84.0471	79.2724	11.709	29.1381	14.486	Transcriptionally Active
NM_023224	Cblc	chr7	20365066	20382158	-	99.3792	16.0765	37.8412	28.6635	31.5472	15.1528	21.6986	1.52841	Transcriptionally Active
NM_007790	Smc3	chr19	53674885	53720321	+	379.135	5.0526	110.567	204.531	91.0015	18.5967	52.6965	15.2873	Transcriptionally Active
NM_026678	Blvra	chr2	126896392	126922820	+	58.0191	7.80856	81.595	94.7352	69.1611	24.1068	35.9576	4.95233	Transcriptionally Active
NM_025509	Ostc	chr3	130398834	130412362	-	402.113	14.6985	60.9007	45.1814	45.2985	11.709	27.2782	45.6042	Transcriptionally Active
NM_008997	Rab11b	chr17	33879428	33897431	-	197.61	3.67462	101.698	90.3628	95.046	8.95395	24.7984	1.30379	Transcriptionally Active
NM_178914	Spata7	chr12	99866393	99908024	+	213.694	13.7798	37.8412	31.0926	35.9961	12.3978	19.8387	0	Transcriptionally Active
NM_026039	Med18	chr4	132014643	132019836	-	596.85	9.64587	73.9086	62.671	68.3522	21.3517	17.9788	4.65066	Transcriptionally Active
NM_145432	Heatr6	chr11	83567138	83597256	+	265.969	5.97126	61.4919	77.7315	58.6454	15.8416	24.1784	2.63583	Transcriptionally Active
NM_009579	Slc30a1	chr1	193730659	193737126	+	216.566	49.148	79.23	89.3912	59.4543	13.7753	18.5988	4.00215	Transcriptionally Active
NM_019802	Ggcx	chr6	72364301	72381100	+	148.782	4.13395	50.2578	77.7315	39.6362	15.1528	21.6986	3.46878	Transcriptionally Active
NM_145703	Kcnip2	chr19	45866835	45890553	-	52.2746	18.3731	61.4919	60.7277	61.881	29.6169	19.8387	0	Transcriptionally Active
NM_011722	Dctn6	chr8	35153476	35171565	-	255.054	10.5645	79.8212	62.1852	65.9255	12.3978	29.758	0	Transcriptionally Active
NM_007525	Bard1	chr1	71074108	71149546	-	385.454	3.21529	87.5077	166.637	70.7789	22.0405	40.2973	6.43506	Transcriptionally Active
NM_183167	AI987944	chr7	48628299	48648630	-	153.377	3.21529	28.9722	53.4404	19.0092	12.3978	21.0786	2.0776	Transcriptionally Active
NM_001037746	Prps1l3	chr12	58331398	58343155	+	323.413	14.2391	154.321	151.091	159.354	26.8619	22.3185	12.8067	Transcriptionally Active
NM_145400	Ube4a	chr9	44731209	44773683	-	325.137	6.43058	53.2142	68.015	45.2985	24.1068	19.2187	5.31747	Transcriptionally Active
NM_001077661	Urgcp	chr11	5613419	5662379	-	302.733	8.72722	120.619	307.039	106.371	24.7956	30.9979	1.18119	Transcriptionally Active
NM_011417	Smarca4	chr9	21420612	21508674	+	413.601	3.67462	141.313	134.087	104.348	16.5304	42.1572	1.30939	Transcriptionally Active
NM_001083894	Liph	chr16	21953890	21995615	-	208.524	4.59327	104.063	179.754	119.313	17.2191	24.1784	4.97894	Transcriptionally Active
NM_016962	Spast	chr17	74738326	74790453	+	299.287	16.0765	70.3609	87.4479	46.1074	17.2191	13.6391	5.39304	Transcriptionally Active
NM_007893	E4f1	chr17	24580723	24592256	-	241.268	7.80856	89.8728	142.346	77.6546	10.3315	19.8387	1.78456	Transcriptionally Active
NM_144846	Fam49b	chr15	63760648	63892010	-	217.715	41.3395	46.7102	72.8732	39.6362	18.5967	20.4586	13.6893	Transcriptionally Active
NM_177464	R3hcc1l	chr19	42593294	42666746	+	212.545	27.1003	38.4325	41.2948	40.8495	24.7956	22.3185	2.47244	Transcriptionally Active
NM_001033634	Zyg11b	chr4	107900359	107973695	-	196.461	18.3731	48.484	41.2948	37.6139	17.9079	23.5584	2.41147	Transcriptionally Active
NM_173748	Nudcd3	chr11	6005694	6100454	-	514.704	6.43058	88.6903	155.949	61.0721	26.1731	26.0383	9.95647	Transcriptionally Active
NM_145523	Gca	chr2	62502383	62532166	+	68.9336	39.9615	40.2063	99.1076	30.3338	13.0865	19.8387	3.29389	Transcriptionally Active
NM_019988	Mlst8	chr17	24610494	24616023	-	245.863	7.34924	66.2221	144.775	55.4098	19.9742	29.1381	0.000310957	Transcriptionally Active
NM_020046	Dhodh	chr8	112117147	112132573	-	364.199	10.5645	95.1942	187.527	74.8234	19.2854	40.2973	9.7056	Transcriptionally Active
NM_001042709	Ilf3	chr9	21172314	21206247	+	597.424	4.59327	128.897	212.79	112.842	26.1731	37.1975	8.79307	Transcriptionally Active
NM_053263	Hnrnpa3	chr2	75497315	75507464	+	1081.11	6.43058	312.781	245.826	284.329	15.1528	70.0554	3.89539	Transcriptionally Active
NM_025450	Mrps17	chr5	130221402	130224566	+	257.352	5.97126	81.0038	104.937	78.059	10.3315	22.9385	33.3436	Transcriptionally Active
NM_001024728	C330021F23Rik	chr8	3567997	3584776	+	305.031	3.21529	91.0553	237.567	79.6768	17.9079	37.8175	1.07751	Transcriptionally Active
NM_010325	Got2	chr8	98388036	98412265	-	291.819	13.3205	62.0832	205.988	46.1074	17.9079	24.7984	6.80665	Transcriptionally Active
NM_007622	Cbx1	chr11	96650449	96669954	+	714.037	3.67462	176.198	206.474	160.567	22.0405	46.4969	31.0713	Transcriptionally Active
NM_198094	Brd4	chr17	32343623	32421068	-	664.06	2.29664	133.035	166.637	116.482	12.3978	35.3377	0.384207	Transcriptionally Active
NM_025889	Tmem134	chr19	4125959	4132307	+	200.482	10.1052	50.8491	75.7882	47.7252	17.2191	15.499	4.58423	Transcriptionally Active
NM_023538	Agk	chr6	40275476	40346761	+	178.653	4.13395	66.2221	138.945	58.2409	18.5967	29.758	1.42983	Transcriptionally Active
NM_001025388	Gm5506	chr4	149611432	149622982	+	1220.7	6.88991	296.226	322.586	267.746	10.3315	58.8961	14.3627	Transcriptionally Active
NM_007386	Aco1	chr4	40090297	40146042	+	178.653	25.263	66.8133	185.098	55.8142	17.9079	47.7368	5.54015	Transcriptionally Active
NM_010886	Ndufa4	chr6	11850372	11857446	-	495.747	2.29664	88.6903	102.508	74.0145	11.0202	26.6582	252.631	Transcriptionally Active
NM_028890	4931414P19Rik	chr14	55202499	55224745	-	106.847	15.1578	37.2499	21.3762	35.1872	19.9742	16.1189	1.31785	Transcriptionally Active
NM_134420	Slc26a6	chr9	108756373	108815380	+	193.588	22.507	56.1705	101.051	44.8941	30.3057	24.1784	1.4893	Transcriptionally Active
NM_009239	Sp4	chr12	119473405	119539913	-	299.861	12.8612	97.5593	78.2173	63.4988	42.7035	28.5181	0.0310854	Transcriptionally Active
NM_181040	Atpaf1	chr4	115457418	115484919	+	264.245	14.6985	66.8133	125.828	39.6362	15.1528	34.7177	0.524292	Transcriptionally Active
NM_198023	Rcor1	chr12	112278008	112351597	+	276.309	52.8226	62.6745	47.1247	66.3299	21.3517	31.6179	1.279	Transcriptionally Active
NM_197992	Pcgf1	chr6	83028383	83030849	+	271.139	33.0716	102.289	89.3912	72.3967	20.663	20.4586	6.51928	Transcriptionally Active
NM_133964	Dohh	chr10	80847172	80851097	+	575.021	6.88991	76.2736	189.47	79.6768	22.0405	34.0977	14.1409	Transcriptionally Active
NM_144522	Tbc1d10b	chr7	134340973	134351982	-	533.661	1.83731	98.7418	72.3874	94.6415	15.1528	21.0786	10.9025	Transcriptionally Active
NM_028099	Dusp11	chr6	85892262	85911661	-	284.351	5.51193	70.9522	110.767	59.4543	18.5967	18.5988	7.6977	Transcriptionally Active
NM_001077529	Nme2	chr11	93811130	93817002	-	261.373	3.21529	188.023	257.971	172.296	8.26519	24.1784	34.4723	Transcriptionally Active
NM_023579	Ipo5	chr14	121310415	121347266	+	654.869	16.9951	111.158	79.1889	88.1703	12.3978	37.1975	61.2509	Transcriptionally Active
NM_153515	Ammecr1l	chr18	31919477	31943737	+	377.411	13.3205	55.5792	75.7882	52.1742	19.9742	34.0977	6.07303	Transcriptionally Active
NM_001029895	Ate1	chr7	137535007	137663883	-	353.285	10.5645	96.3768	225.421	71.5878	11.0202	37.8175	0.2095	Transcriptionally Active
NM_026531	Aen	chr7	86040812	86053719	+	438.303	13.7798	106.428	165.179	85.3391	13.0865	51.4566	2.90863	Transcriptionally Active
NM_175933	Pex5	chr6	124346833	124365085	-	204.503	6.88991	56.1705	101.537	55.8142	20.663	22.3185	7.05416	Transcriptionally Active
NM_013827	Mtf2	chr5	108494692	108538238	+	568.128	3.21529	333.475	316.756	299.294	15.1528	53.9364	19.883	Transcriptionally Active
NM_023149	Cndp2	chr18	84836860	84855025	-	159.696	16.9951	38.4325	41.7807	38.0184	15.1528	19.2187	27.286	Transcriptionally Active
NM_175655	Hist1h4f	chr13	23643200	23643512	-	65.4869	4.59327	220.543	372.139	215.168	8.95395	48.9768	0.2642	Transcriptionally Active
NM_001104530	Med7	chr11	46250448	46256223	+	326.86	13.7798	59.7181	79.1889	55.8142	14.4641	32.2379	6.35361	Transcriptionally Active
NM_011263	Rest	chr5	77694518	77712722	+	720.356	7.34924	203.396	137.002	162.994	19.2854	30.378	3.91445	Transcriptionally Active
NM_029327	Lyrm7	chr11	54652790	54674093	-	312.499	5.97126	133.627	103.48	98.2816	12.3978	32.2379	1.56682	Transcriptionally Active
NM_133345	Ing4	chr6	124989865	124999282	+	375.688	5.51193	164.373	137.973	160.163	19.2854	32.2379	42.2875	Transcriptionally Active
NM_008983	Ptprk	chr10	27794625	28317203	+	589.957	14.2391	88.099	122.427	74.8234	29.6169	48.3568	6.97767	Transcriptionally Active
NM_181650	Prdm4	chr10	85354712	85379690	-	234.374	17.9138	54.988	58.2986	48.1297	15.1528	21.6986	7.4555	Transcriptionally Active
NM_001013441	Ric8b	chr10	84380357	84481082	+	333.753	24.3443	44.3451	51.4971	39.6362	26.1731	19.2187	3.19643	Transcriptionally Active
NM_026086	Nanp	chr2	150855420	150865115	-	365.348	14.2391	101.107	171.495	87.3614	15.8416	38.4375	0.0352301	Transcriptionally Active
NM_175238	Rif1	chr2	51928356	51977901	+	793.885	2.29664	227.047	137.973	198.181	17.9079	53.3165	29.0828	Transcriptionally Active
NM_019670	Diap3	chr14	87056129	87540921	-	186.695	28.9376	48.484	95.221	40.4451	17.2191	27.2782	2.60592	Transcriptionally Active
NM_153591	Nars2	chr7	104100036	104213267	+	254.48	30.7749	58.5356	123.399	46.5119	17.2191	23.5584	3.03537	Transcriptionally Active
NM_194343	Trim45	chr3	100726415	100737934	+	110.294	26.641	53.8054	83.5613	44.0851	16.5304	21.0786	0.660443	Transcriptionally Active
NM_178600	Vkorc1	chr7	135036576	135039131	-	125.229	2.75596	50.2578	131.172	44.4896	16.5304	17.3589	20.6662	Transcriptionally Active
NM_025682	Pspc1	chr14	57341285	57397153	-	631.891	4.59327	53.8054	125.342	49.7475	11.0202	38.4375	26.3373	Transcriptionally Active
NM_145595	Cbr4	chr8	63966530	63982297	+	213.12	16.0765	63.857	98.6218	50.1519	18.5967	21.6986	10.0035	Transcriptionally Active
NM_009302	Swap70	chr7	117365216	117427020	+	306.18	29.397	75.0911	84.533	48.9386	18.5967	33.4778	5.43321	Transcriptionally Active
NM_170588	Cpne1	chr2	155897576	155937701	-	465.876	3.21529	111.158	119.026	94.6415	14.4641	30.378	0	Transcriptionally Active
NM_175562	Rab39	chr9	53492214	53514337	-	208.524	14.6985	36.0674	68.5009	28.716	24.7956	27.8982	0.477529	Transcriptionally Active
NM_024456	Rab5c	chr11	100576579	100599444	-	404.985	19.2917	78.6387	87.4479	53.792	21.3517	26.0383	14.7693	Transcriptionally Active
NM_019817	Copz1	chr15	103103348	103130295	+	394.645	10.1052	72.726	107.367	65.521	15.8416	24.1784	35.5293	Transcriptionally Active
NM_001103157	Steap2	chr5	5664830	5694077	-	290.67	27.5596	82.1863	83.0755	56.2187	19.9742	34.0977	0	Transcriptionally Active
NM_153168	Lars2	chr9	123276057	123371782	+	354.433	7.80856	42.5713	46.6389	29.5249	11.709	28.5181	8.06418	Transcriptionally Active
NM_023764	Tollip	chr7	149067489	149088311	-	357.306	30.7749	86.3252	144.775	68.3522	21.3517	35.9576	7.06567	Transcriptionally Active
NM_011822	Pigq	chr17	26063368	26078907	-	220.587	7.80856	56.1705	90.3628	54.6009	25.4843	29.1381	9.93661	Transcriptionally Active
NM_133801	Gtf2f1	chr17	57142824	57150711	-	340.072	4.59327	115.889	217.648	87.7658	17.9079	39.0574	18.4839	Transcriptionally Active
NM_019951	Sec11a	chr7	88060264	88092436	-	411.304	8.72722	80.4125	129.229	67.1388	15.1528	29.1381	36.0192	Transcriptionally Active
NM_173013	Map1s	chr8	73429872	73441428	+	282.053	8.26789	141.313	207.932	78.4635	19.2854	38.4375	5.86455	Transcriptionally Active
NM_172453	Pif1	chr9	65435011	65443769	+	465.302	13.3205	110.567	178.782	95.4504	22.7293	29.1381	6.42739	Transcriptionally Active
NM_015805	Atp9b	chr18	80930879	81130797	-	182.1	14.6985	37.8412	40.809	36.4006	19.9742	28.5181	4.259	Transcriptionally Active
NM_008155	Gpi1	chr7	34986345	35015324	-	278.032	5.0526	81.595	106.881	93.8326	20.663	39.0574	32.2414	Transcriptionally Active
NM_023066	Asph	chr4	9376231	9596309	-	168.313	39.9615	76.8649	129.229	72.8012	16.5304	37.8175	0	Transcriptionally Active
NM_026344	Dph2	chr4	117561247	117564608	-	272.862	14.2391	97.5593	158.864	91.4059	21.3517	29.1381	7.5389	Transcriptionally Active
NM_012031	Spag1	chr15	36109284	36164932	+	68.9336	4.13395	94.0117	68.015	76.0368	25.4843	21.6986	1.0272	Transcriptionally Active
NM_019921	Akap10	chr11	61684808	61743759	-	346.966	13.7798	84.5514	66.0717	61.881	19.2854	28.5181	3.24765	Transcriptionally Active
NM_177765	Ttll13	chr7	87391261	87405707	+	73.5291	30.7749	34.2936	16.0321	25.4804	13.7753	20.4586	0.456181	Transcriptionally Active
NM_023668	Ndel1	chr11	68634948	68666633	-	403.261	12.4018	110.567	187.041	91.4059	22.7293	29.758	10.4308	Transcriptionally Active
NM_029635	Commd9	chr2	101726418	101741796	+	197.61	35.3682	33.7023	43.7239	31.1427	22.0405	20.4586	4.67203	Transcriptionally Active
NM_011203	Ptpn12	chr5	20492462	20561615	-	494.024	6.88991	88.6903	78.2173	65.9255	17.9079	31.6179	6.64984	Transcriptionally Active
NM_145412	Chtf8	chr8	109407762	109417493	-	850.181	9.64587	160.234	170.038	154.5	26.1731	37.8175	9.84199	Transcriptionally Active
NM_145571	Mob1a	chr6	83276032	83290943	+	233.8	6.88991	67.9959	130.686	59.0498	8.95395	20.4586	4.25394	Transcriptionally Active
NM_026181	Gpatch1	chr7	36061562	36103459	-	210.247	5.97126	41.9801	126.799	33.165	18.5967	25.4183	2.50387	Transcriptionally Active
NM_145931	Zc3h7a	chr16	11136686	11176486	-	325.137	33.0716	51.4404	79.1889	53.3875	23.418	20.4586	14.2048	Transcriptionally Active
NM_025948	Lsm14a	chr7	35129738	35174559	-	669.23	5.97126	176.198	135.058	132.66	19.2854	36.5776	21.9966	Transcriptionally Active
NM_138607	Fam50a	chrX	71558371	71565488	+	187.844	0.918655	72.726	110.282	69.97	4.13259	14.879	21.6597	Transcriptionally Active
NM_021492	Ap3b2	chr7	88605284	88638811	-	91.9114	97.3774	26.6071	54.412	19.4136	25.4843	23.5584	3.26758	Transcriptionally Active
NM_011361	Sgk1	chr10	21714471	21719708	+	692.782	10.5645	429.261	453.272	392.722	14.4641	60.756	1.58075	Transcriptionally Active
NM_133683	Tmem19	chr10	114777795	114799318	-	147.058	11.9425	72.726	115.626	63.0943	21.3517	16.1189	4.51927	Transcriptionally Active
NM_007634	Ccnf	chr17	24360176	24388354	-	553.192	2.29664	156.095	210.361	104.348	17.2191	40.2973	17.544	Transcriptionally Active
NM_010817	Psmd7	chr8	110104279	110112382	-	565.83	4.13395	108.202	180.726	86.148	11.709	26.0383	37.895	Transcriptionally Active
NM_009679	Ap2m1	chr16	20535576	20544126	+	275.734	4.13395	74.4998	91.8203	70.3745	20.663	21.0786	0.00344396	Transcriptionally Active
NM_001039353	Nolc1	chr19	46150352	46160020	+	648.55	0.459327	241.829	214.247	219.212	13.0865	35.3377	8.48847	Transcriptionally Active
NM_001025093	Atf2	chr2	73654578	73730685	-	664.06	4.59327	153.139	219.591	139.94	9.64272	56.4163	0	Transcriptionally Active
NM_028753	Pop7	chr5	137942666	137943657	-	426.814	3.21529	182.111	309.468	132.255	15.8416	37.8175	9.80744	Transcriptionally Active
NM_007841	Ddx6	chr9	44412974	44448814	+	901.881	1.37798	172.65	224.935	152.074	30.3057	63.8558	6.70675	Transcriptionally Active
NM_018878	Paxip1	chr5	28066620	28118090	-	498.045	8.26789	226.456	388.657	157.736	14.4641	42.1572	7.03907	Transcriptionally Active
NM_001007571	D8Ertd738e	chr8	86770133	86773660	-	332.604	1.37798	155.504	212.79	130.233	17.2191	22.9385	40.3445	Transcriptionally Active
NM_026194	Ufl1	chr4	25175732	25208968	-	176.93	15.6171	47.8927	55.8695	43.6807	15.8416	37.1975	6.3685	Transcriptionally Active
NM_001025618	Cant1	chr11	118267602	118280432	-	259.075	6.88991	88.099	124.37	69.97	22.0405	24.1784	6.67044e-05	Transcriptionally Active
NM_029752	Bri3bp	chr5	125921937	125941255	+	297.563	7.80856	55.5792	65.1001	52.9831	24.1068	25.4183	2.42949	Transcriptionally Active
NM_021307	Zfp112	chr7	24897338	24912971	+	165.441	1.83731	40.2063	35.465	46.5119	20.663	19.8387	0.15003	Transcriptionally Active
NM_026601	Hyi	chr4	118032603	118035349	+	97.6559	32.1529	66.2221	80.1606	64.7121	29.6169	22.3185	0	Transcriptionally Active
NM_019715	Kcmf1	chr6	72791107	72849973	-	599.148	6.88991	226.456	254.085	163.803	16.5304	33.4778	13.1186	Transcriptionally Active
NM_029097	Atp13a2	chr4	140542787	140563616	+	117.762	10.5645	35.4761	43.7239	26.6938	24.1068	17.9788	2.63147	Transcriptionally Active
NM_019787	Sec23b	chr2	144381964	144416489	+	328.009	5.51193	61.4919	53.9262	41.6584	19.9742	25.4183	0	Transcriptionally Active
NM_025445	Arfgap3	chr15	83130169	83180677	-	133.272	35.8275	84.5514	110.767	81.6991	17.2191	22.9385	2.65101	Transcriptionally Active
NM_023743	Eif4enif1	chr11	3102585	3144591	+	462.429	5.51193	102.881	88.4195	84.1258	13.7753	21.6986	0.000146216	Transcriptionally Active
NM_024179	0610009O20Rik	chr18	38409902	38422283	+	410.729	5.97126	147.226	162.264	133.469	20.663	45.257	8.68848	Transcriptionally Active
NM_001093749	Mpzl3	chr9	44863299	44882971	+	129.25	10.5645	61.4919	99.1076	57.432	12.3978	31.6179	0.248065	Transcriptionally Active
NM_146087	Csnk1a1	chr18	61715235	61747953	+	1175.89	2.75596	198.075	167.608	178.767	11.709	55.7963	80.0897	Transcriptionally Active
NM_001082412	Slc25a53	chrX	133515654	133572841	-	90.7625	12.4018	24.242	15.5463	19.0092	6.88766	11.7792	0.345609	Transcriptionally Active
NM_172958	Mtmr12	chr15	12134848	12201995	+	275.734	10.1052	123.575	167.123	98.2816	22.0405	21.0786	3.99224	Transcriptionally Active
NM_001081379	Ankrd11	chr8	125407721	125566184	-	901.881	6.88991	189.797	212.79	169.465	15.8416	43.3971	4.30274	Transcriptionally Active
NM_030252	Smim12	chr4	126921027	126925053	+	305.606	32.6122	65.0395	119.998	59.8587	17.9079	27.2782	9.27354	Transcriptionally Active
NM_001037757	Wash	chr17	66460984	66469843	+	179.802	9.18655	65.6308	80.1606	66.3299	19.9742	16.7389	4.61632	Transcriptionally Active
NM_001009947	Dock11	chrX	33428826	33616557	+	105.124	20.6697	33.111	34.0075	24.2671	12.3978	21.6986	1.60471	Transcriptionally Active
NM_183149	Zfp598	chr17	24806696	24818961	+	539.98	4.13395	123.575	242.911	116.886	22.0405	26.0383	27.9803	Transcriptionally Active
NM_145122	Pex16	chr2	92215395	92221377	+	238.395	11.0239	70.3609	92.3061	47.3208	15.1528	17.3589	0.548505	Transcriptionally Active
NM_007635	Ccng2	chr5	93696598	93705257	+	481.961	18.8324	91.0553	187.041	59.8587	11.709	27.2782	4.72352	Transcriptionally Active
NM_001025264	Tpd52	chr3	8929435	9004515	-	512.406	14.2391	103.472	110.767	107.584	19.9742	33.4778	0	Transcriptionally Active
NM_133917	Mlxip	chr5	123844827	123907940	+	148.782	33.9902	41.9801	73.3591	40.4451	24.1068	23.5584	1.92515	Transcriptionally Active
NM_133692	Pold3	chr7	107230622	107270010	-	345.817	6.88991	97.5593	50.0396	74.419	19.2854	32.8578	10.3303	Transcriptionally Active
NM_145393	Ythdf2	chr4	131740830	131768171	-	461.28	9.64587	98.7418	75.3024	80.8902	13.0865	45.257	6.52427	Transcriptionally Active
NM_013649	Ryk	chr9	102737249	102810637	+	192.44	29.8563	52.0316	32.5501	44.4896	23.418	16.7389	1.16319	Transcriptionally Active
NM_133907	Ube3c	chr5	29895781	30002617	+	249.31	12.8612	82.7776	96.1927	75.6323	20.663	32.2379	7.66357	Transcriptionally Active
NM_173015	Mon1b	chr8	116159698	116169079	+	253.331	9.18655	52.6229	129.229	55.4098	14.4641	24.7984	0.65097	Transcriptionally Active
NM_177684	Zfp637	chr6	117791259	117795974	+	200.482	23.4257	62.6745	59.2702	46.1074	18.5967	40.9173	3.59365	Transcriptionally Active
NM_198899	Uggt1	chr1	36196872	36301147	-	327.434	9.18655	49.0753	93.2778	42.4673	24.7956	35.3377	7.55047	Transcriptionally Active
NM_026050	Fam220a	chr5	144309573	144325393	+	35.0412	24.3443	38.4325	82.5897	44.0851	17.9079	13.6391	0.624274	Transcriptionally Active
NM_178398	Wipi2	chr5	143105537	143145324	+	648.55	3.67462	154.912	303.639	136.3	26.1731	42.1572	7.30823	Transcriptionally Active
NM_176843	Ints5	chr19	8967476	8972380	+	318.818	4.13395	281.444	206.96	273.004	8.95395	29.758	4.87779	Transcriptionally Active
NM_153398	Zbtb24	chr10	41170163	41185388	+	409.006	6.43058	82.1863	165.179	74.0145	22.0405	25.4183	0.00485599	Transcriptionally Active
NM_146107	Actr1b	chr1	36756046	36766770	-	272.288	8.72722	50.8491	75.3024	40.4451	17.2191	26.0383	15.3609	Transcriptionally Active
NM_009722	Atp2a2	chr5	122903521	122952234	-	553.766	11.4832	206.353	242.911	161.78	17.2191	35.3377	0	Transcriptionally Active
NM_027103	1700030J22Rik	chr8	119493498	119502843	-	170.611	13.7798	63.2657	98.136	61.4765	16.5304	22.9385	0.611834	Transcriptionally Active
NM_178609	E2f7	chr10	110182520	110224440	+	274.011	62.9278	54.3967	73.3591	52.1742	19.9742	34.7177	1.81764	Transcriptionally Active
NM_027547	Prdm5	chr6	65728955	65886371	+	149.931	35.8275	59.7181	119.998	47.3208	22.7293	28.5181	12.2506	Transcriptionally Active
NM_007422	Adss	chr1	179693308	179726640	-	377.411	5.0526	96.3768	122.427	74.0145	13.7753	45.877	33.4651	Transcriptionally Active
NM_026168	Ergic2	chr6	148127839	148160896	-	595.701	3.21529	118.254	120.484	81.6991	13.0865	40.9173	13.3928	Transcriptionally Active
NM_001005223	Znhit3	chr11	84724456	84729858	-	465.302	11.9425	62.0832	81.1322	52.5786	16.5304	22.3185	17.4097	Transcriptionally Active
NM_016794	Vamp8	chr6	72335214	72340661	-	126.953	16.0765	40.7975	61.6994	33.165	23.418	19.2187	17.1979	Transcriptionally Active
NM_027772	Pdss2	chr10	42941291	43160054	+	523.895	4.59327	107.611	161.779	103.944	14.4641	29.758	1.60453	Transcriptionally Active
NM_001037941	Dnajb6	chr5	30062437	30084508	+	732.419	4.59327	161.416	211.818	134.682	21.3517	40.9173	5.42196	Transcriptionally Active
NM_078477	Klf16	chr10	80029865	80040041	-	419.92	6.43058	152.547	304.124	115.269	25.4843	19.8387	5.2959	Transcriptionally Active
NM_026719	Lmbrd1	chr1	24685382	24823146	+	106.273	24.8037	26.0158	63.6426	29.1205	11.0202	17.3589	2.46805	Transcriptionally Active
NM_009726	Atp7a	chrX	103222614	103323499	+	113.166	1.83731	67.9959	55.8695	81.6991	8.26519	17.3589	1.14302	Transcriptionally Active
NM_177758	Zscan20	chr4	128260782	128287342	-	80.4225	5.0526	46.7102	34.0075	32.7605	17.9079	15.499	0.695325	Transcriptionally Active
NM_011699	Lin7c	chr2	109731034	109741093	+	422.793	15.6171	91.6466	114.654	81.2946	19.2854	29.758	18.2129	Transcriptionally Active
NM_019806	Vapb	chr2	173563071	173609837	+	157.398	13.3205	53.2142	31.0926	42.4673	17.9079	21.6986	3.97503	Transcriptionally Active
NM_001081247	Polr3a	chr14	25267915	25306268	-	249.884	7.80856	53.2142	60.2419	51.7697	16.5304	22.9385	4.12187	Transcriptionally Active
NM_133691	Puf60	chr15	75900611	75911376	-	560.66	2.29664	167.92	239.024	131.851	18.5967	38.4375	0	Transcriptionally Active
NM_175344	Ano6	chr15	95621273	95805903	+	188.993	54.66	53.8054	101.537	39.2317	18.5967	26.6582	3.71766	Transcriptionally Active
NM_026392	Tmem70	chr1	16655271	16668356	+	167.164	58.3346	61.4919	68.015	53.3875	8.95395	34.0977	0.00772095	Transcriptionally Active
NM_177184	Vps13c	chr9	67688202	67843441	+	141.314	13.7798	34.2936	45.6672	33.165	15.8416	15.499	0.631411	Transcriptionally Active
NM_029745	Tbc1d9b	chr11	49944861	49986287	+	132.123	29.8563	40.7975	75.3024	27.5027	18.5967	21.0786	2.58034	Transcriptionally Active
NM_176902	Ubald2	chr11	116295407	116300391	+	600.297	4.13395	178.563	190.928	169.06	15.1528	13.6391	24.2781	Transcriptionally Active
NM_001081027	Kcnt2	chr1	142142833	142506838	+	148.207	26.1817	46.1189	71.9016	27.5027	22.7293	34.0977	0.660247	Transcriptionally Active
NM_001077184	Bsg	chr10	79167102	79174724	+	379.135	3.21529	111.158	132.143	92.2148	19.9742	29.758	92.7211	Transcriptionally Active
NM_001004164	Gnptab	chr10	87842156	87910074	+	214.843	35.3682	40.2063	53.4404	33.9739	15.1528	13.0191	3.96513	Transcriptionally Active
NM_173443	Vcpip1	chr1	9713277	9738463	-	222.885	5.51193	76.2736	117.083	55.0053	16.5304	21.0786	3.18293	Transcriptionally Active
NM_178408	Arrdc1	chr2	24780871	24790801	-	160.845	44.5548	64.4483	133.115	55.0053	11.709	36.5776	0	Transcriptionally Active
NM_029280	Mettl5	chr2	69709251	69723661	-	409.006	9.18655	112.932	103.966	102.731	14.4641	27.8982	36.9977	Transcriptionally Active
NM_173363	Eif5	chr12	112776311	112784964	+	689.91	7.80856	235.325	291.007	189.687	30.3057	60.136	10.3386	Transcriptionally Active
NM_009561	Zfp61	chr7	25076064	25084568	-	203.928	40.8801	54.3967	49.068	39.2317	18.5967	21.6986	3.39052	Transcriptionally Active
NM_138596	Med10	chr13	69948759	69954972	+	201.056	16.5358	31.9285	53.4404	28.716	11.0202	23.5584	15.7805	Transcriptionally Active
NM_020009	Mtor	chr4	147822690	147931794	+	263.096	7.80856	85.7339	102.994	58.6454	11.0202	25.4183	2.69784	Transcriptionally Active
NM_181411	Aftph	chr11	20585087	20641551	-	467.599	6.88991	70.3609	73.8449	65.9255	23.418	29.1381	5.99621	Transcriptionally Active
NM_016804	Mtx2	chr2	74663868	74714805	+	139.016	63.3872	44.3451	93.2778	40.8495	18.5967	25.4183	23.3239	Transcriptionally Active
NM_010734	Lst1	chr17	35322039	35325385	-	36.1901	16.0765	58.5356	87.9337	51.7697	22.7293	17.9788	1.5458	Transcriptionally Active
NM_177394	Endov	chr11	119352933	119372779	+	256.778	23.885	96.3768	194.814	83.7213	23.418	39.6774	8.74527e-05	Transcriptionally Active
NM_001037326	Cstf3	chr2	104430640	104449586	+	624.998	2.75596	141.313	122.427	124.166	15.8416	45.257	7.37413	Transcriptionally Active
NM_138583	Tango2	chr16	18300917	18344025	-	80.9969	24.8037	34.8848	52.4687	39.2317	25.4843	19.8387	5.66948	Transcriptionally Active
NM_009773	Bub1b	chr2	118423946	118467328	+	386.028	16.5358	55.5792	57.8128	48.5341	6.19889	18.5988	18.3184	Transcriptionally Active
NM_030081	Zfyve20	chr6	92136705	92164805	-	304.457	18.3731	47.3015	75.7882	42.0629	18.5967	19.8387	2.37973	Transcriptionally Active
NM_019733	Rbpms	chr8	34893115	35040313	-	855.925	1.83731	141.313	81.618	111.628	25.4843	21.0786	7.22497	Transcriptionally Active
NM_001017959	Lamp2	chrX	35758240	35809632	-	252.182	5.0526	70.3609	84.0471	47.7252	12.3978	16.7389	12.7556	Transcriptionally Active
NM_199035	Alg8	chr7	104520126	104540668	+	322.839	5.51193	109.976	185.584	90.1926	17.2191	38.4375	11.5308	Transcriptionally Active
NM_024436	Rab22a	chr2	173485345	173527683	+	396.942	5.51193	67.9959	102.023	58.6454	17.2191	23.5584	4.84158	Transcriptionally Active
NM_145916	Zfp7	chr15	76709705	76722824	+	331.456	5.0526	92.8291	179.268	83.7213	17.2191	22.9385	16.6451	Transcriptionally Active
NM_133937	Brk1	chr6	113554765	113566945	+	339.498	5.97126	81.595	103.48	71.5878	13.7753	22.9385	46.5565	Transcriptionally Active
NM_023323	Rpf2	chr10	39943051	39966845	-	289.521	4.13395	156.095	216.676	129.424	18.5967	20.4586	17.9063	Transcriptionally Active
NM_177869	Fam185a	chr5	20930720	20987942	+	191.865	20.2104	51.4404	98.136	42.0629	15.1528	16.7389	4.7921	Transcriptionally Active
NM_001081061	Bdp1	chr13	100787948	100874025	-	463.004	14.6985	65.6308	69.9583	59.4543	11.709	22.3185	3.51589	Transcriptionally Active
NM_001081469	Gtf2ird1	chr5	134833530	134932586	-	279.181	12.8612	52.0316	65.5859	55.4098	22.7293	27.8982	0	Transcriptionally Active
NM_175175	Plekhf2	chr4	10915808	10934766	-	852.479	5.97126	218.178	147.204	199.394	16.5304	35.3377	23.99	Transcriptionally Active
NM_029012	Sppl3	chr5	115461532	115548799	+	472.769	19.7511	108.202	148.176	80.8902	20.663	24.1784	11.7722	Transcriptionally Active
NM_029578	Tgds	chr14	118511132	118531987	-	342.945	32.6122	66.2221	98.136	63.0943	15.1528	21.0786	13.4001	Transcriptionally Active
NM_172765	Zbtb44	chr9	30838228	30883470	+	420.495	6.88991	241.829	245.826	190.901	17.2191	39.6774	2.1955	Transcriptionally Active
NM_026981	Dtwd1	chr2	125977876	125991013	+	237.821	27.1003	65.0395	102.994	54.1964	25.4843	42.7772	8.58374	Transcriptionally Active
NM_010887	Ndufs4	chr13	115078002	115178302	-	282.628	22.507	37.8412	71.9016	33.9739	13.7753	28.5181	52.9582	Transcriptionally Active
NM_001024622	Pcnp	chr16	56015620	56029830	-	515.853	11.4832	150.182	159.835	130.638	22.7293	32.2379	3.91452	Transcriptionally Active
NM_175212	Tmem65	chr15	58613823	58654982	-	232.651	36.2869	54.3967	134.573	35.1872	15.8416	27.8982	3.20529	Transcriptionally Active
NM_019826	Ivd	chr2	118687735	118707093	+	110.294	22.0477	50.2578	121.455	37.6139	13.7753	24.7984	7.86568	Transcriptionally Active
NM_001024853	Timm9	chr12	72224158	72237662	-	539.98	5.0526	78.0474	104.937	59.0498	20.663	29.758	2.61362	Transcriptionally Active
NM_029870	Crebrf	chr17	26852594	26913571	+	316.52	13.7798	128.305	106.881	100.304	19.2854	37.1975	4.51317	Transcriptionally Active
NM_024478	Grpel1	chr5	36807833	36816726	+	556.064	17.4544	100.516	155.463	83.3169	22.0405	28.5181	11.8982	Transcriptionally Active
NM_009875	Cdkn1b	chr6	134870418	134875543	+	475.067	33.9902	138.357	214.247	135.087	18.5967	37.1975	8.68453	Transcriptionally Active
NM_201395	Sall4	chr2	168573831	168592701	-	943.816	16.9951	273.757	342.504	207.888	29.6169	44.0171	0	Transcriptionally Active
NM_024173	Atp6v1g1	chr4	63205798	63211735	+	340.072	12.4018	65.0395	89.3912	61.4765	18.5967	24.1784	9.36931	Transcriptionally Active
NM_001081359	Ubr5	chr15	37897082	38008608	-	769.758	8.26789	146.043	157.892	116.077	15.8416	34.7177	1.94451	Transcriptionally Active
NM_008467	Kpna4	chr3	68876142	68931014	-	252.182	21.1291	72.726	94.7352	56.6231	22.0405	36.5776	7.14081	Transcriptionally Active
NM_146159	Haus3	chr5	34496547	34512073	-	287.223	6.43058	91.6466	117.569	74.419	17.2191	38.4375	13.7271	Transcriptionally Active
NM_009191	Clpb	chr7	108812281	108938682	+	140.165	15.6171	41.3888	82.5897	40.8495	24.1068	17.9788	4.41134	Transcriptionally Active
NM_001083887	Pars2	chr4	106323673	106327885	+	216.566	5.0526	85.7339	182.669	79.6768	19.2854	24.7984	1.13079	Transcriptionally Active
NM_001080969	Thg1l	chr11	45761655	45768996	-	122.932	5.97126	54.988	73.8449	46.1074	21.3517	24.1784	5.09426	Transcriptionally Active
NM_011496	Aurkb	chr11	68859144	68865164	+	437.728	6.43058	72.726	128.257	63.0943	19.2854	37.1975	12.1025	Transcriptionally Active
NM_175001	Mrpl22	chr11	57985155	57993082	+	179.802	5.97126	39.0237	62.671	37.2095	16.5304	24.7984	9.45615	Transcriptionally Active
NM_175401	Fbxw17	chr13	50513245	50529138	+	118.91	17.9138	42.5713	93.2778	40.8495	17.2191	21.0786	3.26305	Transcriptionally Active
NM_028031	Zdhhc13	chr7	56044372	56082807	+	157.398	15.1578	54.3967	81.618	52.9831	15.1528	32.8578	12.9307	Transcriptionally Active
NM_145413	Fam20b	chr1	158608701	158649041	-	240.119	45.4734	46.7102	28.1777	40.8495	24.1068	16.1189	3.19424	Transcriptionally Active
NM_001005767	Parl	chr16	20279893	20302435	-	377.411	9.64587	52.0316	95.7069	58.6454	19.9742	18.5988	20.9947	Transcriptionally Active
NM_025776	Rbm22	chr18	60720439	60732383	+	365.348	3.21529	198.666	164.694	156.522	16.5304	27.2782	15.7849	Transcriptionally Active
NM_001081081	Gls	chr1	52220293	52290076	-	295.265	41.3395	118.254	137.973	89.3836	22.7293	47.7368	3.15845	Transcriptionally Active
NM_001085355	Arid1b	chr17	4995073	5347656	+	388.326	16.9951	101.107	60.7277	77.6546	17.9079	22.3185	0.79124	Transcriptionally Active
NM_008576	Abcc1	chr16	14361650	14474971	+	176.93	62.4685	62.0832	31.0926	50.1519	12.3978	31.6179	3.9208	Transcriptionally Active
NM_001004139	Zfp619	chr7	46773135	46795785	+	134.995	11.4832	88.099	166.151	69.1611	13.7753	40.9173	0.559344	Transcriptionally Active
NM_053180	Cdk20	chr13	64533860	64541029	+	107.996	11.4832	50.8491	107.852	35.5917	6.19889	22.9385	2.97526	Transcriptionally Active
NM_172974	Cops7b	chr1	88483674	88503075	+	215.992	5.97126	67.4046	74.8165	48.9386	19.9742	20.4586	8.83875	Transcriptionally Active
NM_016916	Blcap	chr2	157382097	157392097	-	665.783	5.97126	153.73	192.385	127.402	19.2854	41.5373	9.83555	Transcriptionally Active
NM_053262	Hsd17b11	chr5	104418783	104450815	-	177.504	21.5884	59.7181	145.261	56.6231	17.9079	29.758	7.09428	Transcriptionally Active
NM_026571	Lhfpl5	chr17	28712663	28720538	+	26.4245	46.3921	25.4245	76.7598	18.6047	17.9079	19.8387	0.197731	Transcriptionally Active
NM_028319	Zfp518a	chr19	40969194	40992437	+	383.156	44.0954	119.436	177.811	106.775	18.5967	63.8558	6.18735	Transcriptionally Active
NM_024181	Dnajc10	chr2	80155622	80194212	+	172.334	5.97126	54.988	36.9224	55.0053	22.0405	15.499	11.2848	Transcriptionally Active
NM_139308	Stard7	chr2	127095964	127124670	+	419.92	7.80856	105.837	172.953	81.6991	32.372	41.5373	9.4942	Transcriptionally Active
NM_001080927	Rbpj	chr5	53981724	54048684	+	650.848	5.97126	278.487	126.799	279.476	22.7293	30.9979	0	Transcriptionally Active
NM_144514	Commd1	chr11	22799727	22882284	-	290.095	13.3205	75.6824	77.2456	76.8457	17.2191	31.6179	29.8575	Transcriptionally Active
NM_001004150	A4galt	chr15	83057151	83082204	-	326.286	29.397	120.027	149.633	85.7436	18.5967	34.0977	3.49812	Transcriptionally Active
NM_027355	Rnf168	chr16	32277546	32301525	+	529.64	1.83731	105.246	173.924	92.6193	19.9742	32.8578	5.57333	Transcriptionally Active
NM_026502	1110004E09Rik	chr16	90926055	90935094	-	262.522	17.4544	72.1348	95.7069	67.5433	18.5967	24.1784	11.869	Transcriptionally Active
NM_025623	Nipsnap3b	chr4	53024795	53034931	+	152.803	15.1578	70.9522	125.342	60.2632	15.1528	29.758	20.678	Transcriptionally Active
NM_170669	Rps15a	chr7	125247889	125259661	-	823.182	3.67462	528.594	486.793	444.896	12.3978	101.053	23.5587	Transcriptionally Active
NM_028913	Zfp819	chr7	50862538	50873649	+	270.564	17.4544	69.1784	115.626	54.1964	16.5304	29.758	2.74856	Transcriptionally Active
NM_026928	Fuom	chr7	147285368	147288305	-	67.2102	18.8324	73.9086	100.565	55.8142	23.418	22.3185	1.42379	Transcriptionally Active
NM_008632	Map2	chr1	66221902	66489157	+	54.5724	46.8514	27.7896	48.0963	19.8181	17.9079	14.879	0.988486	Transcriptionally Active
NM_025411	Pithd1	chr4	135531516	135543159	-	337.775	13.3205	99.9244	140.888	78.8679	24.1068	17.3589	10.8878	Transcriptionally Active
NM_010719	Lipe	chr7	26164545	26181006	-	155.101	76.7077	64.4483	59.2702	47.3208	14.4641	26.0383	0.108278	Transcriptionally Active
NM_009376	Ift88	chr14	58042907	58136773	+	278.607	26.641	26.6071	35.465	22.6493	23.418	28.5181	3.7199	Transcriptionally Active
NM_001081429	Ccdc15	chr9	37083419	37155977	-	311.924	16.9951	98.1506	157.892	93.0237	20.663	26.0383	0.571999	Transcriptionally Active
NM_010721	Lmnb1	chr18	56867466	56913079	+	942.092	3.21529	216.404	238.053	162.994	14.4641	42.1572	38.3653	Transcriptionally Active
NM_028680	Ift57	chr16	49699406	49765239	+	88.4648	39.0428	21.8769	31.5784	24.2671	24.1068	15.499	2.47435	Transcriptionally Active
NM_010786	Mdm2	chr10	117125960	117147772	-	690.485	2.29664	159.051	169.552	150.86	25.4843	37.1975	5.36333	Transcriptionally Active
NM_010139	Epha2	chr4	140857135	140885299	+	688.187	20.6697	233.551	291.493	188.474	28.9282	45.257	11.6096	Transcriptionally Active
NM_177640	D030056L22Rik	chr19	18787725	18792918	+	517.576	3.21529	134.218	146.718	133.469	18.5967	28.5181	14.9795	Transcriptionally Active
NM_007610	Casp2	chr6	42215037	42232495	+	458.408	10.5645	78.0474	84.533	69.1611	19.2854	16.7389	10.6818	Transcriptionally Active
NM_011499	Strap	chr6	137683602	137700451	+	422.218	38.5835	95.1942	94.2494	71.5878	17.2191	16.7389	34.4177	Transcriptionally Active
NM_152808	Slc44a2	chr9	21142271	21159472	+	134.42	10.1052	52.6229	93.7636	44.4896	14.4641	24.7984	10.8133	Transcriptionally Active
NM_024196	Tbc1d20	chr2	152119607	152138326	+	232.651	15.1578	72.1348	51.9829	61.4765	8.95395	13.0191	4.07509	Transcriptionally Active
NM_016906	Sec61a1	chr6	88453600	88468794	-	495.747	4.59327	130.079	146.718	120.526	21.3517	29.758	26.0715	Transcriptionally Active
NM_008483	Lamb2	chr9	108382192	108392861	+	76.9758	24.8037	26.0158	36.9224	22.6493	29.6169	26.6582	4.22953	Transcriptionally Active
NM_029023	Scpep1	chr11	88785333	88816756	-	361.327	4.59327	75.6824	88.9054	69.5656	22.7293	25.4183	39.9981	Transcriptionally Active
NM_172988	Fbxl4	chr4	22284711	22361193	+	129.25	12.8612	51.4404	69.9583	37.6139	13.0865	29.758	0.00189621	Transcriptionally Active
NM_028053	Tmem38b	chr4	53838916	53874890	+	286.074	23.4257	44.3451	34.4933	30.7383	19.9742	28.5181	6.24714	Transcriptionally Active
NM_025918	Ccdc43	chr11	102546001	102559039	-	427.388	18.8324	83.3689	120.97	86.148	23.418	22.3185	12.5635	Transcriptionally Active
NM_207264	BC052040	chr2	115407451	115604504	+	291.244	8.72722	95.1942	170.523	87.7658	17.9079	21.0786	7.16202	Transcriptionally Active
NM_199149	Ppp1r37	chr7	20116315	20147747	-	337.2	20.6697	126.531	237.567	115.269	21.3517	26.0383	6.10342	Transcriptionally Active
NM_146216	Vac14	chr8	113142537	113244299	+	388.326	25.263	98.1506	152.062	79.2724	13.7753	34.0977	6.28069	Transcriptionally Active
NM_027334	Mettl7a1	chr15	100135247	100144779	+	59.7424	21.5884	36.6586	51.0113	26.6938	15.1528	20.4586	2.01575	Transcriptionally Active
NM_001033145	1190002N15Rik	chr9	94418282	94438500	-	449.217	23.4257	121.21	122.913	87.7658	15.8416	31.6179	3.96888	Transcriptionally Active
NM_028862	Rnf145	chr11	44332465	44379022	+	267.118	33.5309	83.3689	115.626	80.0813	24.7956	30.378	7.68264	Transcriptionally Active
NM_031406	Slc12a9	chr5	137755785	137774810	-	226.906	12.8612	90.4641	147.69	80.0813	21.3517	25.4183	4.00864	Transcriptionally Active
NM_001081238	Palb2	chr7	129250778	129276460	-	635.338	7.34924	78.0474	105.909	73.6101	16.5304	22.9385	0.215911	Transcriptionally Active
NM_144919	Hdac11	chr6	91106808	91124677	+	44.2324	24.8037	27.7896	75.3024	29.5249	21.3517	20.4586	1.40624	Transcriptionally Active
NM_001039170	Eif4e2	chr1	89110488	89125433	+	442.898	5.97126	106.428	122.913	95.4504	26.8619	35.9576	15.4412	Transcriptionally Active
NM_026891	Cdan1	chr2	120541889	120557253	-	358.455	16.0765	96.3768	124.37	103.944	24.1068	22.9385	3.76302	Transcriptionally Active
NM_007757	Cpox	chr16	58670320	58680502	+	244.14	31.6936	60.9007	87.4479	48.5341	25.4843	21.0786	3.64434	Transcriptionally Active
NM_026241	Ankrd39	chr1	36595017	36604046	-	121.208	27.1003	62.6745	135.058	52.1742	20.663	37.1975	1.3044	Transcriptionally Active
NM_145964	Ap1ar	chr3	127510182	127540410	-	253.905	17.9138	86.9165	88.4195	63.0943	13.7753	22.3185	9.93388	Transcriptionally Active
NM_016912	Cdkl2	chr5	92435099	92472068	-	226.906	63.8465	82.7776	73.8449	54.6009	23.418	30.378	2.11917e-05	Transcriptionally Active
NM_001081114	Clip3	chr7	31076771	31093386	+	40.2113	44.5548	22.4682	40.3232	23.8626	22.0405	27.2782	0.64022	Transcriptionally Active
NM_008774	Pabpc1	chr15	36525412	36538728	-	677.272	3.21529	244.194	165.179	196.968	17.9079	76.255	42.7892	Transcriptionally Active
NM_027889	Vps11	chr9	44156187	44169753	-	278.607	9.64587	65.0395	112.225	60.2632	26.1731	26.0383	7.93674	Transcriptionally Active
NM_178741	Klhl8	chr5	104291068	104340248	-	188.993	48.2294	43.7539	42.7523	33.165	29.6169	19.8387	3.11198	Transcriptionally Active
NM_025562	Fis1	chr5	137437946	137442104	+	205.652	4.13395	176.198	226.879	172.296	24.1068	25.4183	28.3435	Transcriptionally Active
NM_001024846	Zfp62	chr11	49017001	49032318	+	509.534	3.21529	146.635	186.07	103.944	16.5304	53.3165	0.397689	Transcriptionally Active
NM_001081150	Lonrf1	chr8	37279117	37312570	-	310.201	37.6648	63.857	85.9904	54.1964	15.1528	23.5584	3.65766	Transcriptionally Active
NM_133921	Nfxl1	chr5	72904542	72950884	-	158.547	45.9327	54.988	54.8978	40.0406	15.8416	34.7177	7.53017	Transcriptionally Active
NM_138680	Luc7l2	chr6	38501443	38559470	+	490.577	7.34924	229.412	291.493	187.261	12.3978	47.7368	24.0839	Transcriptionally Active
NM_001004359	Gprasp1	chrX	132277230	132338007	+	191.291	1.83731	39.0237	63.6426	32.3561	9.64272	15.499	0	Transcriptionally Active
NM_001033225	Pnrc1	chr4	33332397	33335762	-	356.731	7.34924	180.928	184.126	145.198	18.5967	63.8558	9.40137	Transcriptionally Active
NM_001017429	Cox17	chr16	38347084	38352849	+	323.413	3.67462	78.6387	134.573	58.6454	22.7293	27.8982	83.0555	Transcriptionally Active
NM_001085498	Chmp6	chr11	119775123	119780866	+	287.223	7.80856	65.6308	69.4725	49.343	19.9742	17.9788	6.29439	Transcriptionally Active
NM_028543	Zfp763	chr17	33153808	33170326	-	263.671	12.8612	34.8848	77.7315	33.5694	13.0865	29.1381	2.86896	Transcriptionally Active
NM_008638	Mthfd2	chr6	83255697	83267598	-	417.623	8.26789	72.726	134.087	66.7344	28.2394	56.4163	41.2119	Transcriptionally Active
NM_172716	Pcgf3	chr5	108890350	108932118	+	255.054	51.4447	53.8054	76.7598	48.1297	22.0405	24.7984	2.47057	Transcriptionally Active
NM_153088	Ctdsp1	chr1	74438182	74443859	+	301.584	22.9664	157.277	265.259	109.606	34.4383	24.1784	4.3023	Transcriptionally Active
NM_026775	Tmed10	chr12	86681563	86715667	-	359.029	5.0526	67.4046	55.3837	71.1834	9.64272	32.8578	8.39094	Transcriptionally Active
NM_001081132	Upf2	chr2	5872514	5977749	+	669.805	7.34924	89.8728	116.111	73.6101	22.0405	16.7389	4.91983	Transcriptionally Active
NM_173761	Ythdf1	chr2	180639081	180655641	-	481.386	5.0526	110.567	112.711	81.2946	24.1068	29.1381	27.3339	Transcriptionally Active
NM_144818	Ncaph	chr2	126929545	126959690	-	299.861	5.97126	85.1427	137.488	66.3299	13.7753	38.4375	11.0434	Transcriptionally Active
NM_175183	Atxn7l2	chr3	108005172	108013852	-	201.056	21.5884	75.6824	134.573	45.703	23.418	34.0977	1.15234	Transcriptionally Active
NM_026040	Srfbp1	chr18	52625346	52650392	+	393.496	13.7798	60.3094	59.2702	45.2985	7.57642	30.378	18.3519	Transcriptionally Active
NM_013818	Gtpbp1	chr15	79521325	79551909	+	191.865	47.77	57.353	39.3516	43.6807	23.418	29.758	4.58976	Transcriptionally Active
NM_027925	Trnau1ap	chr4	131867677	131885453	-	248.161	16.5358	132.444	144.289	122.549	17.9079	35.3377	11.0887	Transcriptionally Active
NM_009670	Ank3	chr10	69388279	69490184	+	228.055	5.0526	44.9364	58.7844	36.805	16.5304	19.8387	0.000672198	Transcriptionally Active
NM_021536	Rhot1	chr11	80022556	80081409	+	357.306	5.51193	56.1705	60.7277	45.2985	22.7293	21.0786	4.5868	Transcriptionally Active
NM_009758	Bmpr1a	chr14	35224253	35315732	-	442.324	50.526	76.8649	54.412	61.0721	19.2854	28.5181	4.99376	Transcriptionally Active
NM_029295	Cklf	chr8	106774802	106787343	+	197.035	10.5645	65.0395	136.516	59.0498	13.7753	24.7984	1.14161	Transcriptionally Active
NM_010219	Fkbp4	chr6	128380124	128388649	-	672.102	11.0239	149.591	207.446	129.02	20.663	26.0383	73.6441	Transcriptionally Active
NM_025934	Riok2	chr17	17511295	17531863	+	542.852	10.1052	96.968	92.3061	80.0813	13.7753	30.378	17.5079	Transcriptionally Active
NM_144888	Mavs	chr2	131059798	131073760	+	176.355	16.9951	92.2379	117.083	68.3522	23.418	48.3568	0.190495	Transcriptionally Active
NM_001007575	Zfp58	chr13	67591102	67601458	-	186.121	11.4832	33.111	149.147	34.3783	8.95395	11.1593	3.4866	Transcriptionally Active
NM_011344	Sel1l	chr12	93044482	93087597	-	141.888	16.9951	43.7539	61.6994	29.5249	11.709	21.6986	6.83749	Transcriptionally Active
NM_175178	Aifm3	chr16	17489783	17507575	+	70.6569	46.3921	113.524	115.626	100.708	26.8619	15.499	0.563346	Transcriptionally Active
NM_181401	Tmem64	chr4	15192966	15213900	+	196.461	15.6171	107.02	106.395	91.0015	15.8416	28.5181	7.31566	Transcriptionally Active
NM_001033132	Commd6	chr14	102032982	102039688	-	413.027	12.8612	69.7697	131.658	53.792	16.5304	17.9788	4.12391	Transcriptionally Active
NM_025549	Arrdc4	chr7	75886478	75894124	-	216.566	19.7511	46.1189	93.2778	38.8273	16.5304	21.0786	6.31255	Transcriptionally Active
NM_007889	Dvl3	chr16	20517136	20532260	+	211.971	18.3731	59.7181	68.015	46.9163	28.2394	19.2187	1.86253	Transcriptionally Active
NM_170590	Cpne1	chr2	155897576	155937701	-	465.876	3.21529	111.158	119.026	94.6415	14.4641	30.378	8.89294	Transcriptionally Active
NM_022811	Polr1e	chr4	45031496	45046564	+	176.355	12.4018	49.0753	92.7919	47.7252	25.4843	23.5584	3.42177	Transcriptionally Active
NM_009225	Snrpb	chr2	129997371	130005100	-	505.513	12.4018	79.23	77.2456	75.2279	25.4843	73.7751	57.2908	Transcriptionally Active
NM_025830	Wwp2	chr8	109960297	110082495	+	338.349	5.0526	105.837	112.225	84.1258	13.0865	23.5584	6.63515	Transcriptionally Active
NM_016748	Ctps	chr4	120212472	120242881	-	347.54	27.5596	111.158	92.7919	90.1926	22.0405	41.5373	18.82	Transcriptionally Active
NM_175372	Rdh13	chr7	4377266	4397259	-	185.546	10.1052	56.7618	152.548	46.1074	19.2854	21.0786	0.356061	Transcriptionally Active
NM_178364	Zfp369	chr13	65380161	65399103	+	269.99	5.0526	57.353	85.0188	44.8941	12.3978	17.3589	0.588755	Transcriptionally Active
NM_018794	Atp6ap1	chrX	71542435	71550060	+	160.845	0.918655	65.0395	105.423	59.0498	6.88766	22.9385	36.5599	Transcriptionally Active
NM_016710	Hmgn5	chrX	106199875	106208719	-	175.781	6.88991	28.9722	48.5822	17.7958	6.19889	11.7792	9.0159	Transcriptionally Active
NM_001081362	Trrap	chr5	145529660	145620642	+	339.498	5.0526	82.7776	138.945	62.2854	8.26519	29.758	3.65926	Transcriptionally Active
NM_026281	Tm7sf3	chr6	146550797	146583114	-	332.03	2.75596	85.1427	119.998	71.5878	15.8416	29.758	16.9137	Transcriptionally Active
NM_144812	Tnrc6b	chr15	80541742	80771516	+	302.159	18.8324	70.9522	115.626	78.4635	18.5967	34.7177	0.159541	Transcriptionally Active
NM_178647	Cggbp1	chr16	64851910	64859317	+	705.42	1.37798	101.698	94.7352	77.2501	26.1731	21.0786	22.2857	Transcriptionally Active
NM_177352	Gk5	chr9	96019847	96083372	+	413.601	31.2343	126.531	156.92	97.8771	23.418	52.6965	0.958319	Transcriptionally Active
NM_021523	Huwe1	chrX	148237824	148369961	+	523.895	1.37798	162.008	190.442	130.638	4.13259	30.9979	18.9076	Transcriptionally Active
NM_009507	Vhl	chr6	113574014	113581627	+	166.015	37.6648	56.7618	106.881	59.0498	24.7956	24.7984	4.38059	Transcriptionally Active
NM_146097	Cbwd1	chr19	24994405	25036106	-	201.631	6.88991	38.4325	54.8978	34.3783	13.0865	22.3185	9.59864	Transcriptionally Active
NM_173022	BC048403	chr10	121176992	121189915	+	240.119	27.1003	69.1784	92.3061	50.9608	13.7753	20.4586	2.39563	Transcriptionally Active
NM_134058	Pelo	chr13	115878562	115880366	-	223.46	31.6936	82.1863	94.7352	80.0813	12.3978	24.1784	5.61041	Transcriptionally Active
NM_145576	Zfp212	chr6	47870566	47882636	+	190.142	8.72722	59.1268	66.0717	52.9831	20.663	26.6582	1.39632	Transcriptionally Active
NM_145588	Kif22	chr7	134171244	134185934	-	394.07	5.51193	74.4998	95.221	68.3522	19.9742	27.2782	20.75	Transcriptionally Active
NM_019424	Hps1	chr19	42829685	42854466	-	94.7837	22.9664	65.6308	93.7636	47.7252	17.2191	22.3185	3.59457	Transcriptionally Active
NM_180678	Gars	chr6	54987994	55029498	+	674.975	6.88991	88.6903	148.176	65.9255	15.8416	47.1169	80.1698	Transcriptionally Active
NM_027545	Cwf19l2	chr9	3404084	3479236	+	482.535	10.5645	54.988	53.4404	55.0053	15.8416	29.1381	6.90694	Transcriptionally Active
NM_009551	Zfand5	chr19	21346767	21361330	+	464.727	6.88991	160.825	107.367	131.042	11.709	39.0574	3.73331	Transcriptionally Active
NM_008525	Alad	chr4	62167017	62181097	-	200.482	78.545	74.4998	79.6748	77.6546	26.8619	21.6986	2.42916e-05	Transcriptionally Active
NM_172478	Tbc1d25	chrX	7731597	7753307	-	469.323	8.26789	31.3372	77.7315	31.5472	10.3315	8.05947	0.20053	Transcriptionally Active
NM_030729	Nckipsd	chr9	108710710	108720697	+	157.398	13.3205	81.595	128.743	66.3299	26.1731	29.1381	3.96486	Transcriptionally Active
NM_025939	Paics	chr5	77380435	77396531	+	927.731	6.88991	218.178	369.71	182.407	15.8416	64.4757	80.2143	Transcriptionally Active
NM_029767	Rps9	chr7	3655642	3658499	+	804.799	2.75596	481.884	451.814	427.909	17.2191	71.2953	181.835	Transcriptionally Active
NM_011285	Rpgr	chrX	9735341	9793921	-	259.65	36.2869	11.2341	27.6918	12.1335	6.19889	4.95967	6.19682	Transcriptionally Active
NM_009860	Cdc25c	chr18	34892650	34911187	-	220.587	23.4257	38.4325	80.1606	35.9961	15.8416	35.3377	6.97812	Transcriptionally Active
NM_008416	Junb	chr8	87500807	87502647	-	545.724	11.0239	256.019	276.433	226.493	17.9079	64.4757	4.71759	Transcriptionally Active
NM_026776	Vps25	chr11	101115056	101120860	+	277.458	10.5645	75.0911	89.3912	65.521	9.64272	25.4183	36.5607	Transcriptionally Active
NM_028355	Ndc1	chr4	107040388	107086943	+	446.919	8.26789	59.1268	79.6748	57.432	13.0865	21.6986	10.6698	Transcriptionally Active
NM_152234	Ubqln1	chr13	58277516	58317014	-	430.835	22.9664	108.202	129.714	93.4282	13.0865	29.1381	9.4237	Transcriptionally Active
NM_144860	Mib1	chr18	10725622	10812215	+	229.204	7.34924	60.9007	77.2456	42.4673	19.9742	16.7389	0.978069	Transcriptionally Active
NM_027470	Pak4	chr7	29343837	29383203	-	271.139	3.67462	127.123	199.673	97.8771	19.2854	28.5181	6.98905	Transcriptionally Active
NM_145837	Il17d	chr14	58143665	58162003	+	325.711	27.1003	79.8212	66.0717	73.2056	17.2191	26.0383	1.21547	Transcriptionally Active
NM_024475	Ublcp1	chr11	44268072	44284050	-	356.731	16.5358	87.5077	75.7882	84.9347	11.709	24.7984	7.5345	Transcriptionally Active
NM_029409	Mff	chr1	82721492	82748964	+	305.606	18.8324	56.7618	70.93	46.9163	16.5304	30.378	30.3648	Transcriptionally Active
NM_001005419	Ado	chr10	67007258	67011703	-	421.644	9.18655	102.881	61.6994	83.7213	19.2854	22.3185	5.11268	Transcriptionally Active
NM_018776	Crlf3	chr11	79859994	79894493	-	345.817	10.1052	81.0038	98.6218	78.059	17.9079	32.2379	7.20462	Transcriptionally Active
NM_027086	Ubl7	chr9	57758792	57777775	+	240.693	6.88991	82.1863	156.435	68.7567	8.95395	24.1784	7.50301	Transcriptionally Active
NM_001033242	Cln5	chr14	103469432	103476847	+	506.087	22.0477	91.0553	122.427	58.2409	14.4641	26.6582	21.2959	Transcriptionally Active
NM_027930	Mtfr2	chr10	20067624	20081475	+	120.059	6.88991	215.813	190.928	200.203	15.1528	21.0786	4.08313	Transcriptionally Active
NM_016852	Wbp2	chr11	115939886	115948278	-	197.61	8.26789	80.4125	102.508	84.5302	14.4641	29.1381	18.5993	Transcriptionally Active
NM_019428	Rpp30	chr19	36158205	36179263	+	398.666	6.43058	41.3888	44.2098	35.1872	13.0865	29.1381	19.407	Transcriptionally Active
NM_182995	Ccp110	chr7	125856124	125880532	+	186.121	14.2391	24.8333	54.8978	32.7605	14.4641	29.1381	8.62338	Transcriptionally Active
NM_010638	Klf9	chr19	23215715	23241401	+	1261.48	2.75596	523.864	489.708	397.171	23.418	50.8366	14.0256	Transcriptionally Active
NM_026282	Spc24	chr9	21559885	21564730	-	272.288	5.0526	95.7855	197.244	83.3169	7.57642	27.8982	18.771	Transcriptionally Active
NM_172272	Pars2	chr4	106323673	106327887	+	216.566	5.0526	85.7339	182.669	79.6768	19.2854	24.7984	2.83948	Transcriptionally Active
NM_027427	Taf15	chr11	83286609	83320242	+	653.72	15.1578	112.932	111.253	92.2148	17.9079	69.4354	107.882	Transcriptionally Active
NM_153573	Fkbp14	chr6	54527598	54543122	-	91.337	25.263	31.3372	57.8128	27.9071	23.418	24.1784	1.84441	Transcriptionally Active
NM_011849	Nek4	chr14	31764673	31800587	+	147.633	15.1578	65.6308	85.9904	55.0053	28.2394	29.1381	2.10555	Transcriptionally Active
NM_026010	Lipt2	chr7	107307786	107309441	+	164.292	34.9089	74.4998	157.892	59.4543	24.7956	39.6774	2.29365	Transcriptionally Active
NM_001077713	Acn9	chr6	6906017	6989220	+	156.824	19.7511	28.3809	37.8941	37.2095	19.2854	18.5988	6.89007	Transcriptionally Active
NM_010175	Fadd	chr7	151764227	151768341	-	210.822	23.4257	83.9601	214.247	69.97	29.6169	32.2379	0.944398	Transcriptionally Active
NM_173038	Tbcel	chr9	42220399	42280309	-	176.93	16.5358	57.9443	58.2986	43.2762	26.1731	25.4183	4.35313	Transcriptionally Active
NM_198884	B4galnt3	chr6	120153827	120244577	-	425.665	6.43058	108.202	119.512	91.4059	24.7956	40.9173	1.57257	Transcriptionally Active
NM_027406	Aldh1l1	chr6	90500841	90549165	+	64.9124	16.5358	26.0158	55.8695	21.4359	19.2854	23.5584	2.13631	Transcriptionally Active
NM_172700	Zmpste24	chr4	120731842	120770848	-	340.072	13.3205	41.9801	107.367	37.2095	19.9742	29.1381	5.1843	Transcriptionally Active
NM_026186	Cwc25	chr11	97606783	97627927	-	429.111	0.459327	62.0832	226.393	52.1742	19.2854	22.3185	3.83266	Transcriptionally Active
NM_172049	Tmem18	chr12	31269307	31276084	+	126.953	45.9327	44.3451	40.809	37.6139	15.8416	17.9788	6.91185	Transcriptionally Active
NM_175215	Lysmd4	chr7	74367429	74373354	+	149.931	5.97126	33.7023	42.7523	33.9739	15.8416	17.3589	1.91577	Transcriptionally Active
NM_172647	F11r	chr1	173367691	173394724	+	328.583	14.6985	74.4998	119.512	59.8587	23.418	38.4375	13.5383	Transcriptionally Active
NM_008866	Lypla1	chr1	4797973	4836816	+	376.837	5.51193	115.889	99.1076	100.708	19.9742	21.0786	27.8195	Transcriptionally Active
NM_011801	Cfdp1	chr8	114292372	114378210	-	319.967	10.5645	68.5871	108.824	54.1964	28.2394	26.0383	57.0323	Transcriptionally Active
NM_025976	Bfar	chr16	13671950	13703705	+	339.498	11.4832	108.793	160.321	95.4504	15.8416	33.4778	3.4216	Transcriptionally Active
NM_001026211	Dnajc19	chr3	33956679	33980248	-	339.498	7.80856	239.464	235.138	212.337	15.1528	20.4586	2.14342	Transcriptionally Active
NM_010093	E2f3	chr13	29998443	30077932	-	518.725	10.1052	167.329	197.729	124.571	25.4843	63.2358	0.479498	Transcriptionally Active
NM_026314	Dyx1c1	chr9	72806591	72820874	+	225.757	11.9425	49.6666	115.14	51.7697	17.9079	16.1189	0.575502	Transcriptionally Active
NM_029639	1600029D21Rik	chr9	50302629	50313744	+	132.123	10.5645	28.3809	72.3874	35.9961	19.2854	22.9385	9.37561	Transcriptionally Active
NM_028476	Atat1	chr17	36036773	36047013	-	83.8692	4.13395	202.805	240.482	207.483	15.8416	21.0786	1.94533	Transcriptionally Active
NM_028035	Snx10	chr6	51494521	51540669	+	50.5513	5.97126	96.968	79.1889	87.3614	22.7293	24.1784	0.401695	Transcriptionally Active
NM_145828	Xylt2	chr11	94525160	94538807	-	188.993	20.2104	70.3609	146.232	53.3875	19.9742	17.3589	3.57806	Transcriptionally Active
NM_007682	Cenpb	chr2	131003024	131005748	-	290.67	18.3731	92.8291	157.892	74.419	25.4843	39.6774	4.70232	Transcriptionally Active
NM_026620	Fam98b	chr2	117075474	117097276	+	179.802	15.6171	36.0674	74.8165	33.9739	11.0202	26.0383	10.9099	Transcriptionally Active
NM_145568	Krcc1	chr6	71222012	71235313	+	546.873	5.51193	327.563	364.852	275.027	22.0405	43.3971	20.4613	Transcriptionally Active
NM_025550	Psmd6	chr14	14944698	14953418	-	361.901	11.9425	60.9007	48.5822	47.7252	15.1528	22.9385	55.7553	Transcriptionally Active
NM_148924	Zfp263	chr16	3744098	3750788	+	503.79	5.97126	91.0553	125.828	81.2946	15.1528	27.2782	8.03311	Transcriptionally Active
NM_026499	Srsf6	chr2	162757243	162762856	+	420.495	29.397	244.194	191.9	203.034	17.2191	41.5373	146.822	Transcriptionally Active
NM_001033457	Nom1	chr5	29761206	29778709	+	293.542	15.6171	86.9165	75.7882	77.6546	16.5304	32.2379	5.70325	Transcriptionally Active
NM_025473	Fam3a	chrX	71630058	71638478	-	130.399	6.88991	37.8412	84.0471	28.3116	16.5304	16.1189	4.38878	Transcriptionally Active
NM_181470	Ltv1	chr10	12898443	12912943	-	221.162	11.4832	44.3451	54.412	36.805	12.3978	22.3185	21.7699	Transcriptionally Active
NM_027590	Ints10	chr8	71317852	71351543	+	359.029	16.9951	46.7102	68.5009	47.7252	12.3978	15.499	3.16015	Transcriptionally Active
NM_019668	Ube2a	chrX	34414360	34424215	+	160.271	7.34924	52.0316	66.0717	41.254	13.7753	22.9385	15.5708	Transcriptionally Active
NM_010153	Erbb3	chr10	128006423	128026557	-	356.157	35.8275	50.8491	50.5255	46.5119	58.5451	23.5584	1.06061	Transcriptionally Active
NM_175530	Fbxo46	chr7	19705207	19723610	+	230.927	47.3107	62.0832	116.111	56.6231	11.709	24.1784	1.01806	Transcriptionally Active
NM_007688	Cfl2	chr12	55959805	55963864	-	336.626	19.7511	62.0832	47.1247	55.4098	15.1528	29.1381	21.1439	Transcriptionally Active
NM_001013769	Rsl1	chr13	67274117	67284434	+	32.7434	4.13395	17.7381	57.8128	14.1558	6.19889	6.81955	0.919276	Transcriptionally Active
NM_199196	Suz12	chr11	79806607	79847625	+	661.762	4.13395	174.424	196.758	154.096	15.8416	50.8366	4.80896	Transcriptionally Active
NM_018817	Smarcal1	chr1	72629824	72683364	+	178.078	9.64587	65.6308	123.399	50.5564	18.5967	30.9979	3.02617	Transcriptionally Active
NM_025901	Polr3k	chr2	181599064	181605531	+	241.268	14.6985	72.1348	137.973	54.6009	13.0865	27.8982	4.95429	Transcriptionally Active
NM_145483	Zfp160	chr17	21145904	21165820	+	282.628	8.72722	47.3015	68.5009	42.0629	20.663	16.1189	4.35861	Transcriptionally Active
NM_053204	Erc1	chr6	119520813	119798168	-	302.159	12.8612	69.1784	93.2778	46.1074	21.3517	22.3185	1.43205	Transcriptionally Active
NM_153421	Phc3	chr3	30798216	30868337	-	259.65	19.7511	39.615	68.015	41.6584	28.2394	25.4183	4.70711e-05	Transcriptionally Active
NM_023175	Nit2	chr16	57156777	57167445	-	245.863	7.80856	104.063	186.556	86.5525	12.3978	26.6582	17.4604	Transcriptionally Active
NM_153541	Zbtb8b	chr4	129103008	129118062	-	94.7837	45.9327	20.6944	18.947	22.6493	28.9282	27.2782	0.977455	Transcriptionally Active
NM_010303	Gna13	chr11	109224107	109262683	+	454.387	6.88991	108.202	253.599	87.7658	21.3517	27.2782	9.43564	Transcriptionally Active
NM_001025615	Ccdc50	chr16	27389062	27452304	+	159.696	29.8563	25.4245	39.8374	24.2671	16.5304	21.0786	8.74699	Transcriptionally Active
NM_011952	Mapk3	chr7	133903139	133909330	+	198.758	7.34924	41.9801	122.913	40.0406	25.4843	22.3185	11.8969	Transcriptionally Active
NM_175833	Cdv3	chr9	103255431	103268110	-	462.429	6.43058	151.365	116.597	107.988	18.5967	31.6179	3.5369	Transcriptionally Active
NM_029546	Pwp2	chr10	77633654	77647894	-	388.326	6.43058	99.3331	112.711	77.2501	13.7753	16.7389	8.25509	Transcriptionally Active
NM_030557	Mynn	chr3	30501008	30517416	+	563.532	13.7798	57.9443	118.54	50.5564	22.0405	16.7389	1.263	Transcriptionally Active
NM_138669	Eif4a3	chr11	119149676	119161357	-	627.296	8.72722	111.75	118.54	88.1703	11.709	28.5181	27.79	Transcriptionally Active
NM_145612	Zfp810	chr9	22081191	22112082	-	183.823	10.1052	43.7539	67.0434	44.4896	24.7956	15.499	2.28653	Transcriptionally Active
NM_010238	Brd2	chr17	34248963	34258692	-	1015.05	3.67462	401.471	376.998	353.086	30.9945	109.733	0	Transcriptionally Active
NM_024480	Sh3bp5l	chr11	58144219	58161230	+	709.441	4.13395	84.5514	95.221	79.2724	15.8416	38.4375	4.74844	Transcriptionally Active
NM_026055	Rpl39	chrX	34622514	34625179	-	819.161	3.67462	200.44	297.323	209.101	10.3315	45.257	122.499	Transcriptionally Active
NM_178654	Pkn2	chr3	142453865	142544968	-	356.157	9.64587	100.516	45.1814	83.7213	18.5967	24.7984	9.90159	Transcriptionally Active
NM_030057	Trappc6b	chr12	60144078	60162448	-	249.31	4.59327	57.9443	110.767	56.6231	16.5304	24.1784	11.185	Transcriptionally Active
NM_021888	Qtrt1	chr9	21216280	21224723	+	310.201	5.97126	111.158	128.743	87.3614	9.64272	29.758	24.9281	Transcriptionally Active
NM_019767	Arpc1a	chr5	145844737	145869625	+	152.803	23.4257	44.3451	78.2173	33.9739	17.2191	15.499	19.1414	Transcriptionally Active
NM_198296	9130011E15Rik	chr19	45892633	46072978	-	305.606	7.80856	65.6308	95.221	57.8365	27.5506	29.758	3.66584	Transcriptionally Active
NM_025832	Naa16	chr14	79734313	79790475	-	349.263	4.59327	47.8927	64.1285	43.6807	41.3259	33.4778	7.45861	Transcriptionally Active
NM_011622	Tom1	chr8	77557584	77594020	+	253.905	11.9425	162.599	166.151	168.656	12.3978	26.6582	0	Transcriptionally Active
NM_172704	Dnajc11	chr4	151307828	151356068	+	500.917	5.51193	91.6466	74.8165	71.5878	20.663	30.9979	15.1752	Transcriptionally Active
NM_178614	Samm50	chr15	84022662	84044733	+	502.641	4.13395	176.198	219.106	137.109	13.0865	31.6179	32.0251	Transcriptionally Active
NM_028456	Rwdd3	chr3	120858319	120874613	-	88.4648	46.3921	47.8927	45.1814	34.3783	22.7293	22.9385	3.97898	Transcriptionally Active
NM_025381	Atp6v1f	chr6	29417782	29420509	+	365.922	11.4832	56.1705	125.828	59.0498	20.663	24.1784	38.0903	Transcriptionally Active
NM_001080819	Arid1a	chr4	133234922	133309526	-	565.255	1.37798	257.793	213.762	196.968	29.6169	25.4183	12.3082	Transcriptionally Active
NM_007750	Cox8a	chr19	7289647	7292106	-	470.472	4.59327	67.9959	110.282	62.2854	22.0405	27.2782	83.8867	Transcriptionally Active
NM_001025309	Pja2	chr17	64630354	64681223	-	149.931	10.5645	33.7023	49.5538	29.5249	14.4641	24.1784	1.25705	Transcriptionally Active
NM_016661	Ahcy	chr2	154885047	154900233	-	269.99	25.263	98.7418	138.945	74.8234	19.9742	34.7177	1.9963	Transcriptionally Active
NM_028762	Rbm19	chr5	120566521	120648980	+	386.602	6.88991	72.1348	80.6464	54.6009	13.7753	35.9576	1.68587	Transcriptionally Active
NM_009833	Ccnt1	chr15	98373641	98398067	-	804.799	3.21529	202.805	274.489	160.567	19.9742	63.2358	1.3823	Transcriptionally Active
NM_025274	Dppa5a	chr9	78214860	78216006	-	117.187	3.21529	221.134	181.697	186.452	6.19889	25.4183	316.499	Transcriptionally Active
NM_025351	Chchd6	chr6	89333139	89545646	-	80.4225	27.5596	31.9285	32.5501	30.3338	15.1528	19.8387	3.82592	Transcriptionally Active
NM_172926	Snx14	chr9	88271584	88333789	-	225.183	30.3156	248.333	225.907	263.702	15.1528	35.3377	6.70224	Transcriptionally Active
NM_008874	Plcb3	chr19	7028202	7044242	-	146.484	11.9425	81.595	159.835	64.7121	26.8619	13.0191	0.00024895	Transcriptionally Active
NM_001081436	Ino80d	chr1	63094374	63160841	-	778.949	4.13395	103.472	110.767	63.4988	14.4641	42.1572	4.19239	Transcriptionally Active
NM_008684	Neo1	chr9	58722486	58884248	-	440.6	40.8801	68.5871	85.5046	59.0498	29.6169	26.6582	0	Transcriptionally Active
NM_029946	Efcab6	chr15	83697141	83895779	-	30.4457	46.8514	24.8333	34.9792	23.4582	10.3315	14.2591	0.0157818	Transcriptionally Active
NM_028118	Wdsub1	chr2	59690421	59720663	-	117.762	20.6697	51.4404	93.7636	38.8273	30.9945	27.2782	3.29968	Transcriptionally Active
NM_182996	Zfp692	chr11	58120570	58128115	+	99.3792	16.9951	47.8927	45.1814	39.2317	16.5304	31.6179	2.59034	Transcriptionally Active
NM_144820	Ccdc28a	chr10	17933490	17954787	-	244.714	5.51193	59.1268	104.937	35.5917	19.9742	22.9385	7.54506	Transcriptionally Active
NM_008640	Laptm4a	chr12	8928112	8945547	+	399.24	7.34924	138.357	160.807	127.402	17.9079	58.8961	45.5254	Transcriptionally Active
NM_175112	Rae1	chr2	172825617	172841240	+	369.944	5.51193	96.968	82.1039	74.8234	21.3517	24.7984	43.5237	Transcriptionally Active
NM_023423	Akirin1	chr4	123412437	123427542	-	208.524	35.3682	53.8054	52.4687	54.6009	19.9742	19.2187	2.47779	Transcriptionally Active
NM_009798	Capzb	chr4	138748813	138847735	+	381.432	9.64587	91.6466	90.3628	80.4857	33.7495	23.5584	1.77448	Transcriptionally Active
NM_144550	Spice1	chr16	44347513	44388605	+	181.525	14.6985	73.9086	90.8487	60.6676	20.663	18.5988	6.69708	Transcriptionally Active
NM_010124	Eif4ebp2	chr10	60895244	60915417	-	495.747	5.97126	105.246	115.14	86.5525	24.1068	23.5584	12.2091	Transcriptionally Active
NM_001001447	Zscan22	chr7	13483163	13493588	+	196.461	6.43058	47.8927	110.282	38.8273	17.2191	18.5988	3.70671e-05	Transcriptionally Active
NM_028601	Zmiz2	chr11	6289366	6306165	+	236.672	5.0526	67.9959	115.626	58.2409	11.0202	22.3185	0.433635	Transcriptionally Active
NM_028763	Cbx6	chr15	79654327	79664763	-	303.882	11.9425	78.6387	152.062	65.521	19.9742	22.9385	5.23693	Transcriptionally Active
NM_028336	Tmem107	chr11	68884310	68886795	+	259.075	17.9138	76.2736	132.629	64.7121	28.2394	24.7984	0.61616	Transcriptionally Active
NM_023565	Cse1l	chr2	166731595	166771889	+	507.236	1.37798	131.853	205.503	99.8994	21.3517	47.7368	29.9642	Transcriptionally Active
NM_011284	Rpa2	chr4	132324274	132334661	+	488.854	3.21529	113.524	165.665	92.6193	13.0865	39.0574	23.9309	Transcriptionally Active
NM_146249	Zfp119b	chr17	56077797	56084682	-	52.2746	4.59327	25.4245	32.0642	21.4359	12.3978	10.5393	2.53844	Transcriptionally Active
NM_028809	Arpc5l	chr2	38863658	38871392	+	422.793	5.0526	212.857	161.293	194.945	16.5304	31.6179	20.0636	Transcriptionally Active
NM_026312	Pbdc1	chrX	102275113	102280525	+	292.393	1.83731	33.7023	48.0963	32.3561	5.51012	17.9788	4.67472	Transcriptionally Active
NM_011342	Sec22b	chr3	97705149	97726241	+	323.988	15.6171	30.746	60.7277	40.4451	16.5304	14.2591	8.27488	Transcriptionally Active
NM_009496	Vamp1	chr6	125165598	125172324	+	154.526	49.148	56.1705	42.7523	42.8718	21.3517	26.0383	1.53247	Transcriptionally Active
NM_011663	Zrsr1	chr11	22872004	22876496	+	347.54	6.43058	196.892	299.266	164.207	13.0865	107.873	2.04193	Transcriptionally Active
NM_145360	Idi1	chr13	8884851	8891642	+	325.137	9.64587	88.6903	243.882	74.419	14.4641	35.9576	0.093031	Transcriptionally Active
NM_145951	Enox2	chrX	46362883	46641419	-	82.1458	8.26789	25.4245	40.3232	21.8403	6.19889	11.1593	2.46004e-05	Transcriptionally Active
NM_007853	Degs1	chr1	184205900	184212890	-	361.901	5.97126	152.547	168.094	116.077	15.1528	34.7177	40.2684	Transcriptionally Active
NM_013770	Slc25a10	chr11	120353150	120362475	+	226.332	11.0239	212.265	247.283	205.866	21.3517	29.758	1.25114	Transcriptionally Active
NM_028428	Fut11	chr14	21514189	21519419	+	183.823	7.80856	286.765	296.351	241.862	23.418	21.6986	0.749614	Transcriptionally Active
NM_025932	Syap1	chrX	159294774	159326394	-	150.505	7.80856	24.242	41.7807	20.627	9.64272	4.33971	15.2856	Transcriptionally Active
NM_009831	Ccng1	chr11	40562053	40568788	-	348.689	4.13395	157.869	146.718	106.775	17.9079	50.2167	36.088	Transcriptionally Active
NM_001081182	Atp8b2	chr3	89743402	89767254	-	329.732	53.282	66.8133	73.3591	78.8679	22.7293	16.7389	2.32744	Transcriptionally Active
NM_011042	Pcbp2	chr15	102301062	102330490	+	305.606	2.75596	216.996	60.7277	182.407	11.709	35.9576	0	Transcriptionally Active
NM_027742	Lrrfip2	chr9	111020614	111128172	+	259.075	22.9664	54.3967	91.8203	48.9386	18.5967	16.7389	6.45933	Transcriptionally Active
NM_001024717	Gal3st3	chr19	5298330	5308739	+	51.1257	40.4208	28.3809	56.8411	32.7605	15.1528	23.5584	0.781765	Transcriptionally Active
NM_172688	Map3k7	chr4	32051081	32110441	+	521.597	16.5358	121.801	168.094	100.708	13.7753	43.3971	4.05091	Transcriptionally Active
NM_018793	Tyk2	chr9	20908511	20935719	-	130.399	4.59327	105.837	154.005	82.9124	22.0405	22.3185	1.83151	Transcriptionally Active
NM_138677	Edem1	chr6	108778634	108809350	+	295.84	19.7511	104.063	144.775	118.909	19.9742	27.2782	4.88736	Transcriptionally Active
NM_025581	Ska1	chr18	74354952	74367472	-	201.056	5.51193	66.2221	123.885	55.8142	15.1528	21.6986	0.650737	Transcriptionally Active
NM_175180	Wdr44	chrX	23270242	23383127	+	214.269	6.88991	42.5713	34.4933	29.1205	7.57642	19.8387	1.99733	Transcriptionally Active
NM_019809	Pdlim5	chr3	141965043	142058660	-	242.991	12.8612	63.857	99.5934	37.2095	22.7293	27.2782	0	Transcriptionally Active
NM_145476	Tbc1d22a	chr15	86044888	86328933	+	465.302	5.51193	83.9601	150.119	67.9478	12.3978	27.8982	2.21143	Transcriptionally Active
NM_011750	Sf1	chr19	6363689	6378038	+	557.213	4.13395	207.535	237.567	195.754	24.1068	30.9979	24.9985	Transcriptionally Active
NM_172549	Cabin1	chr10	75108854	75227102	-	318.243	3.67462	93.4204	159.35	78.4635	17.9079	25.4183	3.60364	Transcriptionally Active
NM_028142	Nsun4	chr4	115704374	115726481	-	183.823	14.2391	70.9522	134.087	61.0721	18.5967	27.2782	4.20824	Transcriptionally Active
NM_001039078	Prosc	chr8	28153026	28160713	+	369.944	7.34924	96.3768	135.544	101.517	14.4641	26.0383	0	Transcriptionally Active
NM_138745	Mthfd1	chr12	77356218	77420807	+	566.404	3.67462	102.881	198.701	84.5302	15.1528	36.5776	22.6854	Transcriptionally Active
NM_024194	Lrrc40	chr3	157699666	157731442	+	711.165	5.51193	64.4483	109.31	75.2279	13.7753	35.9576	4.68651	Transcriptionally Active
NM_019705	Rbck1	chr2	152142069	152158375	-	349.838	8.26789	85.1427	119.512	63.0943	18.5967	32.8578	15.322	Transcriptionally Active
NM_033608	Igsf9	chr1	174412447	174429008	+	146.484	21.1291	54.988	96.1927	55.4098	23.418	29.758	4.08156e-05	Transcriptionally Active
NM_153056	Sirt7	chr11	120479685	120486316	-	207.375	8.26789	241.238	268.174	222.852	17.2191	18.5988	6.88269	Transcriptionally Active
NM_028597	Thoc3	chr13	54560197	54570201	-	306.18	5.51193	60.9007	67.0434	50.1519	15.1528	27.2782	9.74686	Transcriptionally Active
NM_153774	Ipo9	chr1	137278891	137327068	-	319.967	25.263	86.3252	67.5292	65.521	19.9742	27.8982	9.71704	Transcriptionally Active
NM_145510	Rabif	chr1	136391236	136404461	+	354.433	3.67462	160.234	207.932	128.615	14.4641	30.9979	10.6306	Transcriptionally Active
NM_172255	Wdr11	chr7	136735376	136779252	+	259.65	12.4018	43.1626	59.2702	35.5917	17.9079	29.758	7.83068	Transcriptionally Active
NM_175482	Usp28	chr9	48793489	48850622	+	614.083	5.0526	116.48	107.852	96.6638	19.9742	22.3185	25.4421	Transcriptionally Active
NM_026045	Prpf18	chr2	4543212	4573132	-	290.095	5.51193	41.9801	32.5501	24.2671	13.7753	24.1784	6.4986	Transcriptionally Active
NM_001033348	Ralgapa2	chr2	146067034	146337740	-	152.803	27.5596	50.8491	62.1852	41.6584	11.709	18.5988	1.48886	Transcriptionally Active
NM_020567	Gmnn	chr13	24843713	24853806	-	389.475	5.51193	133.627	151.576	111.628	19.2854	35.9576	37.9154	Transcriptionally Active
NM_026407	Tmem39a	chr16	38562926	38592275	+	629.593	2.75596	143.087	137.002	114.055	15.1528	25.4183	0	Transcriptionally Active
NM_001040695	Uevld	chr7	54178585	54213888	-	194.163	31.6936	36.0674	75.3024	24.6715	22.0405	15.499	2.15746	Transcriptionally Active
NM_001029850	Magi1	chr6	93625448	94233898	-	278.032	54.66	81.595	200.644	48.5341	15.1528	38.4375	0.157375	Transcriptionally Active
NM_015749	Tcn2	chr11	3817082	3832047	-	65.4869	22.9664	22.4682	86.4763	24.2671	14.4641	21.0786	0	Transcriptionally Active
NM_134013	Psme4	chr11	30671774	30780361	+	508.96	7.80856	114.706	175.867	91.0015	16.5304	36.5776	23.5138	Transcriptionally Active
NM_054052	B3gnt5	chr16	19760326	19772846	+	165.441	39.5022	30.746	57.327	34.3783	19.9742	24.7984	2.69614	Transcriptionally Active
NM_197980	Cox19	chr5	139813775	139821120	-	190.716	13.7798	40.2063	46.6389	35.9961	14.4641	24.7984	10.2036	Transcriptionally Active
NM_028017	Napg	chr18	63137569	63159104	+	178.653	11.4832	56.1705	111.739	52.1742	17.2191	16.7389	9.39795	Transcriptionally Active
NM_172590	Wdr41	chr13	95746298	95793271	+	66.6358	16.5358	46.1189	40.809	30.7383	18.5967	14.879	3.71846	Transcriptionally Active
NM_001039551	Cnnm3	chr1	36568720	36585082	+	355.582	10.5645	88.6903	99.1076	79.6768	18.5967	21.0786	0.299219	Transcriptionally Active
NM_011307	Uimc1	chr13	55129240	55201656	-	151.654	14.2391	81.0038	94.2494	60.6676	14.4641	19.8387	4.28292	Transcriptionally Active
NM_011438	Sox12	chr2	152219347	152223782	-	676.698	7.80856	174.424	261.372	139.94	15.1528	38.4375	3.23104	Transcriptionally Active
NM_080557	Snx4	chr16	33251541	33299648	+	342.945	5.97126	63.2657	103.48	48.9386	18.5967	26.6582	7.76629	Transcriptionally Active
NM_009210	Hltf	chr3	19957810	20018376	+	220.587	7.80856	70.3609	133.115	66.3299	9.64272	28.5181	2.09577	Transcriptionally Active
NM_001013378	Uspl1	chr5	149996135	150027010	+	587.659	1.83731	226.456	308.497	196.968	28.2394	75.015	0	Transcriptionally Active
NM_008138	Gnai2	chr9	107516468	107537673	-	289.521	18.3731	59.1268	112.711	52.1742	18.5967	23.5584	20.9436	Transcriptionally Active
NM_009874	Cdk7	chr13	101466979	101500897	-	524.47	2.29664	104.655	161.779	83.7213	17.2191	24.7984	5.74393	Transcriptionally Active
NM_145445	Eif2b2	chr12	86560462	86567578	+	361.327	19.7511	73.3173	116.597	57.432	25.4843	22.3185	13.5335	Transcriptionally Active
NM_153287	Csrnp1	chr9	119880283	119893776	-	450.366	8.72722	101.107	229.308	82.9124	13.7753	32.8578	4.05834	Transcriptionally Active
NM_019786	Tbk1	chr10	120983512	121023850	-	210.247	16.5358	124.758	81.618	126.189	17.9079	19.2187	7.00135	Transcriptionally Active
NM_183091	Tonsl	chr15	76456666	76470359	-	132.123	3.67462	47.3015	107.852	43.6807	18.5967	27.8982	5.01415	Transcriptionally Active
NM_017381	Zranb2	chr3	157197360	157211303	+	400.389	16.9951	93.4204	103.966	81.2946	19.2854	40.2973	92.3488	Transcriptionally Active
NM_031179	Sf3b1	chr1	55042012	55084322	-	593.403	11.0239	171.468	201.616	150.051	14.4641	51.4566	45.0723	Transcriptionally Active
NM_001083921	Rbck1	chr2	152142069	152158161	-	351.561	7.34924	86.3252	116.111	63.9032	18.5967	34.0977	1.82729	Transcriptionally Active
NM_011264	Rev3l	chr10	39451965	39595011	+	468.174	9.18655	115.297	79.6748	91.8104	15.8416	42.1572	3.45939	Transcriptionally Active
NM_026007	Eef1g	chr19	9041530	9052670	+	1119.6	1.83731	387.872	336.189	323.965	18.5967	62.6159	12.4912	Transcriptionally Active
NM_022331	Herpud1	chr8	96910399	96919258	+	561.234	28.4783	102.289	203.073	86.148	22.7293	78.7348	9.53227	Transcriptionally Active
NM_028758	Gga2	chr7	129130235	129164712	-	342.945	10.1052	81.0038	129.229	61.0721	19.9742	34.0977	13.2182	Transcriptionally Active
NM_027164	Lrrc27	chr7	146398886	146428872	+	77.5503	21.1291	54.3967	121.455	46.9163	18.5967	30.9979	0.49901	Transcriptionally Active
NM_201393	Plec	chr15	76001403	76028639	-	98.8048	6.88991	54.988	94.2494	42.8718	22.0405	23.5584	0	Transcriptionally Active
NM_008394	Irf9	chr14	56222821	56228867	+	99.3792	0.918655	98.1506	139.917	84.9347	15.1528	26.0383	0.965262	Transcriptionally Active
NM_175518	Tmem245	chr4	56888884	56960301	-	430.26	8.72722	91.0553	77.7315	62.6899	18.5967	20.4586	1.75329	Transcriptionally Active
NM_001036293	Nrbf2	chr10	66729436	66748029	-	248.161	15.1578	67.4046	127.285	52.5786	23.418	32.8578	0.677003	Transcriptionally Active
NM_001076681	Lyrm9	chr11	78640096	78657401	+	139.59	67.5211	31.3372	75.3024	32.7605	21.3517	14.879	1.0988	Transcriptionally Active
NM_009554	Zfp37	chr4	61850576	61869580	-	224.609	16.9951	52.6229	71.9016	46.9163	20.663	28.5181	0	Transcriptionally Active
NM_026443	Mtfp1	chr11	3991483	3995434	-	330.881	6.88991	149.591	281.291	131.851	22.7293	25.4183	3.39182	Transcriptionally Active
NM_010472	Agfg1	chr1	82836057	82892850	+	337.775	10.5645	74.4998	50.0396	63.9032	22.0405	22.3185	13.1636	Transcriptionally Active
NM_053269	Rad51c	chr11	87191108	87217997	-	241.268	14.2391	84.5514	129.229	74.8234	18.5967	32.8578	4.5195	Transcriptionally Active
NM_173182	Fndc3b	chr3	27315083	27609361	-	238.395	56.9566	51.4404	82.1039	35.1872	30.9945	22.9385	3.16414	Transcriptionally Active
NM_173010	Ube3a	chr7	66484119	66545188	+	487.705	7.34924	102.289	215.705	98.686	15.1528	48.9768	0.257519	Transcriptionally Active
NM_025448	Ssr2	chr3	88383592	88392335	+	713.462	5.0526	306.868	343.962	244.693	16.5304	28.5181	159.239	Transcriptionally Active
NM_001008233	Plekhn1	chr4	155595564	155602651	-	29.8712	16.0765	86.3252	95.221	91.4059	17.2191	27.2782	4.52733	Transcriptionally Active
NM_001004365	Actr3b	chr5	25265843	25356159	+	174.057	46.8514	39.0237	119.026	29.9294	28.9282	22.9385	1.67047	Transcriptionally Active
NM_024459	Ppp3r1	chr11	17059300	17100383	+	329.158	5.97126	76.8649	108.338	57.432	17.9079	22.3185	12.269	Transcriptionally Active
NM_025800	Ppp1r2	chr16	31251626	31275363	-	226.332	14.2391	53.8054	54.412	56.2187	14.4641	18.5988	2.60387	Transcriptionally Active
NM_019746	Pdcd5	chr7	36427003	36432501	-	309.627	4.59327	79.8212	90.3628	74.8234	17.9079	25.4183	3.28807	Transcriptionally Active
NM_001003893	Masp2	chr4	147976652	147989589	+	73.5291	5.51193	280.261	322.1	241.053	9.64272	25.4183	13.7177	Transcriptionally Active
NM_028270	Aldh1b1	chr4	45811893	45817480	+	47.6791	42.7174	27.1983	31.0926	19.4136	17.2191	17.9788	1.92836	Transcriptionally Active
NM_025512	Zfand1	chr3	10339955	10351301	-	184.972	7.80856	78.6387	57.327	64.3077	13.7753	21.6986	5.08739	Transcriptionally Active
NM_173037	Tango6	chr8	109206967	109375339	+	202.78	8.72722	87.5077	96.1927	67.1388	19.2854	49.5967	1.50273	Transcriptionally Active
NM_008801	Pde6d	chr1	88439589	88479076	-	303.308	9.18655	64.4483	98.6218	51.3653	19.9742	21.6986	7.01166	Transcriptionally Active
NM_001033337	Ttc38	chr15	85662733	85689252	+	47.1046	11.4832	44.9364	74.8165	30.3338	17.9079	23.5584	0.745144	Transcriptionally Active
NM_183392	Nup54	chr5	92844565	92864225	-	431.984	13.3205	96.968	160.807	76.4412	22.7293	39.0574	7.6242	Transcriptionally Active
NM_172605	Tdrd3	chr14	87816389	87945315	+	318.818	10.1052	72.1348	167.608	60.2632	17.9079	30.378	2.70081	Transcriptionally Active
NM_025882	Pole4	chr6	82596705	82602859	-	174.057	4.13395	200.44	254.085	150.051	15.1528	73.1552	26.672	Transcriptionally Active
NM_025999	Rnf141	chr7	117960048	117987895	-	152.803	22.9664	39.0237	59.2702	38.4228	19.2854	17.9788	0.881677	Transcriptionally Active
NM_138753	Hexim1	chr11	102977638	102981038	+	811.118	8.72722	383.733	382.342	326.392	14.4641	50.2167	5.5818	Transcriptionally Active
NM_016895	Ak2	chr4	128670467	128688773	+	271.139	37.2055	83.3689	194.329	71.9923	15.1528	29.758	32.6105	Transcriptionally Active
NM_198102	Tra2a	chr6	49193919	49214051	-	615.232	4.13395	162.008	227.85	120.122	14.4641	58.2761	166.843	Transcriptionally Active
NM_001004154	Rragb	chrX	149574500	149606486	+	140.739	10.1052	36.6586	50.0396	30.3338	11.0202	12.3992	12.0051	Transcriptionally Active
NM_201406	Pigs	chr11	78141923	78156278	+	237.246	23.4257	54.3967	117.083	35.1872	17.2191	26.0383	3.90442	Transcriptionally Active
NM_153403	Ago1	chr4	126112256	126145665	-	330.881	6.88991	68.5871	85.0188	52.5786	19.9742	26.6582	5.22666	Transcriptionally Active
NM_009963	Cry2	chr2	92243803	92274226	-	164.866	58.3346	50.8491	93.7636	42.8718	17.2191	29.1381	2.83881	Transcriptionally Active
NM_133215	Mtmr4	chr11	87405718	87429798	+	562.958	2.75596	112.932	162.264	79.2724	15.1528	40.2973	4.92978	Transcriptionally Active
NM_001013256	Ctc1	chr11	68829412	68849975	+	406.708	5.51193	137.766	183.155	106.775	11.709	40.2973	4.46169	Transcriptionally Active
NM_025347	Ypel3	chr7	133920488	133924028	+	125.804	5.97126	129.488	189.956	115.269	11.0202	25.4183	14.1371	Transcriptionally Active
NM_028965	Snx11	chr11	96628862	96638869	-	296.989	3.21529	83.3689	119.026	78.4635	32.372	34.7177	3.43265	Transcriptionally Active
NM_172758	Slc38a7	chr8	98359822	98377391	-	268.841	5.51193	91.6466	179.268	74.0145	14.4641	53.3165	8.82764	Transcriptionally Active
NM_007596	Caml	chr13	55724365	55733777	+	264.82	17.4544	66.8133	160.807	77.6546	18.5967	29.1381	10.7759	Transcriptionally Active
NM_198653	Iars2	chr1	187110540	187153280	-	276.883	7.80856	88.6903	90.8487	69.97	12.3978	22.3185	10.3735	Transcriptionally Active
NM_025942	Ola1	chr2	72930857	73052504	-	224.609	37.2055	75.6824	99.1076	55.8142	22.0405	34.0977	21.3187	Transcriptionally Active
NM_175357	Crbn	chr6	106728238	106750081	-	202.78	11.4832	44.9364	64.1285	39.6362	18.5967	22.3185	0.281422	Transcriptionally Active
NM_178420	Nlrx1	chr9	44060795	44076574	-	88.4648	40.4208	27.7896	41.7807	30.7383	15.8416	19.2187	1.61939e-05	Transcriptionally Active
NM_025964	Mettl21a	chr1	64653053	64663742	-	318.818	27.1003	98.1506	95.221	89.7881	21.3517	28.5181	4.74594	Transcriptionally Active
NM_029977	Polq	chr16	37011871	37095503	+	248.735	10.1052	48.484	66.5576	44.8941	14.4641	29.758	0.296666	Transcriptionally Active
NM_029502	Cant1	chr11	118267602	118280432	-	259.075	6.88991	88.099	124.37	69.97	22.0405	24.1784	1.58734	Transcriptionally Active
NM_028780	Tm9sf1	chr14	56254802	56262643	-	386.602	10.5645	34.8848	63.6426	31.1427	16.5304	21.6986	10.3036	Transcriptionally Active
NM_027352	Gorasp2	chr2	70499565	70529782	+	301.01	20.6697	88.6903	136.03	75.2279	26.8619	32.8578	11.2372	Transcriptionally Active
NM_176840	Osbpl11	chr16	33185156	33243398	+	237.821	20.6697	29.5634	75.7882	36.805	19.2854	24.1784	3.37718	Transcriptionally Active
NM_001003908	Cltc	chr11	86508154	86570994	-	913.37	4.59327	208.718	305.096	141.153	21.3517	55.7963	28.0726	Transcriptionally Active
NM_133998	Fam207a	chr10	76949399	76978558	-	249.31	5.51193	117.662	155.463	94.6415	19.9742	29.1381	4.13961	Transcriptionally Active
NM_020027	Prrc2a	chr17	35286030	35301822	-	734.143	2.29664	124.758	115.14	106.775	15.1528	24.1784	9.85627	Transcriptionally Active
NM_172763	Zfp809	chr9	22030146	22047798	+	397.517	4.59327	60.3094	86.9621	58.6454	9.64272	30.9979	9.73911	Transcriptionally Active
NM_028190	Luc7l	chr17	26389854	26422451	+	600.297	1.83731	117.071	142.346	113.246	9.64272	53.9364	7.87916	Transcriptionally Active
NM_021518	Rab2a	chr4	8462790	8534849	+	217.715	27.5596	50.8491	62.671	37.2095	13.0865	19.2187	17.3532	Transcriptionally Active
NM_133748	Insig2	chr1	123200929	123224601	-	218.29	28.9376	61.4919	89.3912	44.4896	11.709	27.8982	0	Transcriptionally Active
NM_178674	Fbxl21	chr13	56623868	56639147	+	56.8702	34.4496	16.5555	24.7769	18.2003	10.3315	13.6391	0.187511	Transcriptionally Active
NM_009071	Rock1	chr18	10064398	10181790	-	389.475	27.5596	66.8133	107.852	58.2409	18.5967	26.0383	5.48168	Transcriptionally Active
NM_007888	Dvl2	chr11	69814127	69823611	+	483.684	4.59327	284.991	286.635	267.342	18.5967	35.3377	13.804	Transcriptionally Active
NM_133702	Nol11	chr11	107027974	107050695	-	396.942	9.18655	50.8491	106.395	47.3208	18.5967	30.9979	8.24683	Transcriptionally Active
NM_029942	Prelid2	chr18	42035349	42110848	-	125.229	22.9664	46.7102	38.8657	38.8273	15.1528	17.3589	10.6896	Transcriptionally Active
NM_177267	Dcaf5	chr12	81436833	81537588	-	229.779	49.148	54.3967	41.7807	47.7252	53.035	18.5988	1.35106	Transcriptionally Active
NM_016961	Mapk9	chr11	49660252	49699923	+	244.14	13.7798	54.988	110.282	53.792	20.663	29.1381	0.0767511	Transcriptionally Active
NM_009271	Src	chr2	157250028	157297574	+	117.187	26.641	62.0832	108.338	58.6454	15.1528	25.4183	0.000512938	Transcriptionally Active
NM_021528	Chst12	chr5	140981562	141001192	+	164.866	33.9902	66.2221	223.964	55.8142	23.418	27.2782	1.59136	Transcriptionally Active
NM_015729	Acox1	chr11	116033196	116060359	-	248.161	11.4832	54.3967	123.885	54.1964	15.1528	24.7984	6.41063	Transcriptionally Active
NM_011780	Adam23	chr1	63492477	63643089	+	346.966	17.9138	146.043	102.508	114.46	31.6832	29.1381	24.6859	Transcriptionally Active
NM_011156	Prep	chr10	44787019	44878801	+	176.355	38.1242	50.2578	81.1322	44.4896	19.2854	19.8387	7.1742	Transcriptionally Active
NM_001038608	Txnl4a	chr18	80403536	80409471	+	654.869	3.67462	124.758	128.257	108.797	21.3517	27.2782	0	Transcriptionally Active
NM_170687	Ank3	chr10	69388279	69490184	+	228.055	5.0526	44.9364	58.7844	36.805	16.5304	19.8387	0.637505	Transcriptionally Active
NM_138952	Ripk2	chr4	16050521	16090645	-	113.166	30.3156	52.6229	85.5046	33.165	19.2854	20.4586	1.02152	Transcriptionally Active
NM_017472	Snx3	chr10	42221859	42255175	+	437.728	4.59327	87.5077	132.629	82.1035	19.2854	24.7984	41.747	Transcriptionally Active
NM_029492	Zdhhc20	chr14	58451538	58509099	-	315.371	3.67462	24.8333	46.6389	20.2225	8.95395	17.9788	8.67794	Transcriptionally Active
NM_008749	Nucb1	chr7	52748043	52765778	-	236.097	5.0526	41.9801	66.0717	33.5694	21.3517	17.9788	0.000610721	Transcriptionally Active
NM_019737	B4galt6	chr18	20843099	20904905	-	402.687	25.7223	109.385	115.14	83.3169	25.4843	26.6582	10.8864	Transcriptionally Active
NM_019477	Acsl4	chrX	138752535	138825078	-	100.528	39.5022	28.9722	67.0434	29.1205	8.95395	16.7389	0.178849	Transcriptionally Active
NM_178056	Tm2d3	chr7	72838302	72846799	+	255.629	31.2343	86.9165	80.1606	71.1834	15.1528	21.0786	0.448535	Transcriptionally Active
NM_178883	Gorab	chr1	165315039	165333772	-	318.818	11.4832	43.7539	29.1493	29.5249	17.9079	29.758	4.58533	Transcriptionally Active
NM_173754	Usp43	chr11	67668024	67735655	-	248.735	50.0667	40.2063	110.282	40.4451	32.372	18.5988	0.00085605	Transcriptionally Active
NM_008569	Anapc1	chr2	128435818	128513131	-	310.201	15.1578	63.857	92.3061	60.6676	19.9742	49.5967	7.35403	Transcriptionally Active
NM_145927	Fntb	chr12	77938453	78022399	+	268.841	23.885	91.6466	91.3345	80.4857	23.418	32.2379	11.7411	Transcriptionally Active
NM_026661	Aar2	chr2	156373311	156394708	+	275.16	11.4832	44.3451	103.48	46.1074	15.1528	27.8982	2.3464	Transcriptionally Active
NM_007910	Efna4	chr3	89137314	89141950	-	185.546	13.7798	88.6903	133.601	61.0721	24.1068	24.1784	6.22526	Transcriptionally Active
NM_025904	Yae1d1	chr13	18078473	18085185	-	321.69	10.5645	50.8491	110.767	56.6231	19.9742	28.5181	2.36374	Transcriptionally Active
NM_011729	Ercc5	chr1	44204588	44238105	+	279.755	21.5884	46.1189	130.686	45.703	11.709	35.3377	6.47802	Transcriptionally Active
NM_027052	Slc38a4	chr15	96825253	96886387	-	353.859	43.6361	69.1784	64.1285	65.1166	19.9742	25.4183	27.7168	Transcriptionally Active
NM_026799	Drosha	chr15	12754569	12865046	+	515.853	7.34924	114.115	150.119	99.8994	14.4641	27.2782	12.2913	Transcriptionally Active
NM_011758	Zfp39	chr11	58701654	58717727	-	128.102	26.1817	44.9364	57.327	38.0184	20.663	35.3377	0.873915	Transcriptionally Active
NM_178896	Dcun1d4	chr5	73882264	73952033	+	279.755	11.4832	67.4046	125.828	49.7475	26.8619	26.6582	0	Transcriptionally Active
NM_026527	Chac2	chr11	30876708	30886365	-	112.017	7.34924	54.3967	39.3516	44.4896	17.9079	26.6582	2.78369	Transcriptionally Active
NM_001103156	Steap2	chr5	5664830	5694077	-	290.67	27.5596	82.1863	83.0755	56.2187	19.9742	34.0977	0	Transcriptionally Active
NM_025850	Fank1	chr7	140968573	141073215	+	190.142	37.2055	38.4325	43.2381	34.3783	15.8416	17.9788	0.489723	Transcriptionally Active
NM_181416	Arhgap11a	chr2	113671649	113688818	-	488.279	2.29664	90.4641	130.686	64.7121	23.418	29.1381	11.6132	Transcriptionally Active
NM_013717	B9d1	chr11	61318673	61326429	+	211.971	23.885	72.726	107.367	63.0943	18.5967	30.378	11.4849	Transcriptionally Active
NM_146154	Ppp1r8	chr4	132382839	132399084	-	458.983	5.51193	124.166	135.058	118.909	17.2191	30.378	17.2758	Transcriptionally Active
NM_198311	Ttc8	chr12	100158821	100221448	+	86.167	44.0954	32.5198	30.1209	26.2893	19.2854	19.2187	1.71695	Transcriptionally Active
NM_199447	Rrp12	chr19	41937340	41970643	-	252.756	21.1291	51.4404	85.5046	42.0629	15.8416	24.7984	6.50207	Transcriptionally Active
NM_013633	Pou5f1	chr17	35642976	35647722	+	1170.72	4.13395	271.392	419.264	248.737	52.3462	44.0171	88.7537	Transcriptionally Active
NM_178700	Grsf1	chr5	89088261	89105196	-	313.648	61.0905	52.6229	35.9508	45.2985	14.4641	24.1784	0.128055	Transcriptionally Active
NM_009068	Ripk1	chr13	34094742	34127039	+	252.182	28.9376	53.8054	62.671	61.0721	18.5967	26.0383	1.22238	Transcriptionally Active
NM_010444	Nr4a1	chr15	101097276	101105225	+	236.097	21.5884	83.3689	115.14	58.6454	22.0405	24.7984	5.68765	Transcriptionally Active
NM_029505	Ap3m2	chr8	23897825	23916126	-	104.549	63.3872	40.7975	30.1209	35.5917	17.2191	16.1189	1.68995	Transcriptionally Active
NM_023217	Pgpep1	chr8	73170334	73183637	-	277.458	5.51193	57.353	141.374	46.9163	28.9282	31.6179	2.39268	Transcriptionally Active
NM_029277	Arhgap12	chr18	6024447	6136096	-	396.942	6.43058	107.02	162.75	90.1926	22.7293	39.6774	10.1259	Transcriptionally Active
NM_028898	Rptor	chr11	119464308	119760905	+	375.114	12.4018	59.7181	105.909	50.1519	22.0405	26.6582	2.03835	Transcriptionally Active
NM_009740	Bcl10	chr3	145587341	145597247	+	224.034	9.18655	72.726	133.601	63.9032	24.7956	27.8982	6.73408	Transcriptionally Active
NM_024254	Katnbl1	chr2	112219367	112254394	+	384.305	6.43058	109.976	90.3628	99.4949	16.5304	37.8175	10.9892	Transcriptionally Active
NM_025699	Oser1	chr2	163231557	163245206	-	799.629	4.59327	138.357	177.811	115.269	14.4641	34.0977	0.668477	Transcriptionally Active
NM_001099634	Myof	chr19	37973525	38118067	-	52.8491	56.4973	34.8848	65.5859	37.2095	13.0865	15.499	3.86675	Transcriptionally Active
NM_177140	Tmem251	chr12	103981969	103983607	+	331.456	9.18655	232.369	185.584	195.35	21.3517	30.378	10.3006	Transcriptionally Active
NM_146051	3830406C13Rik	chr14	13116722	13135745	+	151.654	25.7223	65.0395	122.913	55.0053	23.418	34.7177	0	Transcriptionally Active
NM_011390	Slc12a7	chr13	73901144	73954190	+	382.007	10.1052	106.428	169.552	78.4635	20.663	36.5776	14.581	Transcriptionally Active
NM_181593	Itpkc	chr7	27992188	28013616	-	270.564	11.4832	89.2815	176.839	75.6323	20.663	34.0977	2.24689	Transcriptionally Active
NM_028177	Ndufab1	chr7	129231557	129245362	-	217.715	7.34924	47.8927	58.2986	61.0721	17.2191	14.879	2.69551	Transcriptionally Active
NM_033524	Spred1	chr2	116946806	117008013	+	413.601	17.4544	120.619	176.353	118.1	23.418	34.7177	6.74143	Transcriptionally Active
NM_134156	Actn1	chr12	81268528	81361358	-	519.3	11.9425	112.341	144.289	103.944	11.709	34.7177	19.0423	Transcriptionally Active
NM_146211	Glt25d1	chr8	74134922	74148810	+	384.305	13.7798	86.3252	153.034	84.9347	18.5967	22.3185	29.4199	Transcriptionally Active
NM_172739	Grlf1	chr7	17079821	17200342	-	375.688	10.5645	224.091	273.032	197.372	23.418	44.0171	2.11868	Transcriptionally Active
NM_138630	Arhgap4	chrX	71139690	71156637	-	31.5946	5.97126	51.4404	61.6994	46.1074	8.95395	15.499	0.656106	Transcriptionally Active
NM_009556	Zfp42	chr8	44380420	44392363	-	978.282	5.51193	611.963	335.217	524.573	15.8416	39.0574	67.1405	Transcriptionally Active
NM_198033	Setx	chr2	28980511	29037991	+	369.944	3.21529	183.884	113.682	156.522	22.0405	30.378	11.8493	Transcriptionally Active
NM_018745	Azin1	chr15	38417184	38449021	-	480.812	35.3682	118.845	163.236	110.415	12.3978	44.0171	10.9807	Transcriptionally Active
NM_011818	Gmcl1	chr6	86641761	86683372	-	319.967	14.6985	101.107	138.459	85.3391	19.2854	14.2591	5.54566	Transcriptionally Active
NM_011906	Tpra1	chr6	88852244	88862234	+	320.541	5.51193	48.484	118.055	45.2985	22.0405	19.2187	7.23853	Transcriptionally Active
NM_172618	Btbd9	chr17	30352468	30713232	-	309.052	39.0428	127.714	240.482	101.113	35.8158	38.4375	0.614888	Transcriptionally Active
NM_024200	Mfn1	chr3	32428403	32478147	+	181.525	10.5645	30.1547	54.412	23.0537	13.0865	18.5988	6.87238	Transcriptionally Active
NM_028404	Top1mt	chr15	75487462	75509220	-	128.102	20.6697	31.3372	49.5538	30.3338	27.5506	24.7984	3.63681	Transcriptionally Active
NM_013758	Add3	chr19	53218486	53321816	+	234.374	49.6074	96.3768	129.229	62.2854	21.3517	19.8387	2.7869	Transcriptionally Active
NM_173865	Slc41a1	chr1	133724588	133745440	+	229.779	31.6936	88.099	137.488	61.4765	29.6169	30.9979	2.44695	Transcriptionally Active
[truncated: 5,253 more rows]
