# Supplementary material for: Decoding the function of bivalent chromatin in development and cancer
Source: HighWire-hosted journal article supplement (doi:10.1101/gr.275736.121), 2021-10-19
Supplement: Supplemental_Table_S5.xlsx [file Supplemental_Table_S5.xlsx]

## Sheet: Bivalent
Supplemental Table 5. Results from Gene Ontology (GO) analysis
Category	Term	Count	List Total	Pop Hits	Pop Total	Fold Enrichment	P-Value	Bonferroni	Benjamini	%FDR
GOTERM_BP_3	GO:0048731~system development	721	1405	4610	17915	1.99423	8.96339e-102	1.24681e-98	1.24681e-98	1.47571e-98
GOTERM_BP_3	GO:0007275~multicellular organism development	771	1405	5195	17915	1.89238	2.11751e-99	2.94545e-96	1.47273e-96	3.4862e-96
GOTERM_BP_3	GO:0048513~animal organ development	554	1405	3520	17915	2.00682	9.87596e-72	1.37375e-68	4.57915e-69	1.62595e-68
GOTERM_BP_3	GO:0009653~anatomical structure morphogenesis	458	1405	2744	17915	2.12825	1.80746e-64	2.51418e-61	6.28544e-62	2.97575e-61
GOTERM_BP_3	GO:0048869~cellular developmental process	625	1405	4465	17915	1.78484	1.76832e-62	2.45973e-59	4.91946e-60	2.91131e-59
GOTERM_BP_3	GO:0048468~cell development	397	1405	2278	17915	2.22217	1.38879e-59	1.93181e-56	3.21969e-57	2.28647e-56
GOTERM_BP_3	GO:0007267~cell-cell signaling	275	1405	1294	17915	2.70981	6.74324e-57	9.37985e-54	1.33998e-54	1.11019e-53
GOTERM_BP_3	GO:0009887~organ morphogenesis	241	1405	1038	17915	2.96047	8.39097e-57	1.16718e-53	1.45898e-54	1.38147e-53
GOTERM_BP_3	GO:2000026~regulation of multicellular organismal development	339	1405	1888	17915	2.28949	8.16913e-53	1.13633e-49	1.26258e-50	1.34494e-49
GOTERM_BP_3	GO:0009888~tissue development	325	1405	1889	17915	2.19377	3.72875e-46	5.18669e-43	5.18669e-44	6.13891e-43
GOTERM_BP_3	GO:0007389~pattern specification process	141	1405	474	17915	3.79299	1.07301e-45	1.49255e-42	1.35687e-43	1.76657e-42
GOTERM_BP_3	GO:0045595~regulation of cell differentiation	308	1405	1802	17915	2.1794	7.03836e-43	9.79036e-40	8.15864e-41	1.15878e-39
GOTERM_BP_3	GO:0048568~embryonic organ development	138	1405	494	17915	3.56199	2.70292e-41	3.75977e-38	2.89213e-39	4.45002e-38
GOTERM_BP_3	GO:0051240~positive regulation of multicellular organismal process	278	1405	1596	17915	2.22102	7.09487e-40	9.86896e-37	7.04926e-38	1.16808e-36
GOTERM_BP_3	GO:0048598~embryonic morphogenesis	158	1405	648	17915	3.10901	2.37783e-39	3.30757e-36	2.20504e-37	3.9148e-36
GOTERM_BP_3	GO:0060322~head development	176	1405	791	17915	2.83711	2.79159e-38	3.8831e-35	2.42694e-36	4.59599e-35
GOTERM_BP_3	GO:0048522~positive regulation of cellular process	591	1405	4808	17915	1.56734	4.216e-38	5.86445e-35	3.44968e-36	6.9411e-35
GOTERM_BP_3	GO:0060284~regulation of cell development	202	1405	1006	17915	2.56032	3.12993e-37	4.35373e-34	2.41874e-35	5.15302e-34
GOTERM_BP_3	GO:0007420~brain development	166	1405	745	17915	2.84114	3.91351e-36	5.44369e-33	2.8651e-34	6.44309e-33
GOTERM_BP_3	GO:0035295~tube development	160	1405	702	17915	2.90619	4.78612e-36	6.65749e-33	3.32875e-34	7.87973e-33
GOTERM_BP_3	GO:0007423~sensory organ development	144	1405	608	17915	3.01995	2.54544e-34	3.54071e-31	1.68605e-32	4.19074e-31
GOTERM_BP_3	GO:0010646~regulation of cell communication	384	1405	2785	17915	1.75811	2.6943e-32	3.74777e-29	1.70353e-30	4.43582e-29
GOTERM_BP_3	GO:0051094~positive regulation of developmental process	220	1405	1252	17915	2.24057	1.19254e-31	1.65882e-28	7.21226e-30	1.96336e-28
GOTERM_BP_3	GO:0045597~positive regulation of cell differentiation	182	1405	981	17915	2.36561	5.9432e-29	8.26699e-26	3.44458e-27	9.78472e-26
GOTERM_BP_3	GO:0030900~forebrain development	105	1405	413	17915	3.24175	1.07957e-27	1.50168e-24	6.00674e-26	1.77738e-24
GOTERM_BP_3	GO:0035239~tube morphogenesis	104	1405	413	17915	3.21088	4.51039e-27	6.27396e-24	2.41306e-25	7.42578e-24
GOTERM_BP_3	GO:0048646~anatomical structure formation involved in morphogenesis	209	1405	1263	17915	2.11	1.92993e-26	2.68454e-23	9.94273e-25	3.17739e-23
GOTERM_BP_3	GO:0030030~cell projection organization	223	1405	1392	17915	2.04271	2.67576e-26	3.72198e-23	1.32928e-24	4.40529e-23
GOTERM_BP_3	GO:0007154~cell communication	672	1405	6231	17915	1.37516	4.29485e-26	5.97413e-23	2.06005e-24	7.07092e-23
GOTERM_BP_3	GO:0051241~negative regulation of multicellular organismal process	196	1405	1157	17915	2.16005	4.93356e-26	6.86258e-23	2.28753e-24	8.12248e-23
GOTERM_BP_3	GO:0048729~tissue morphogenesis	134	1405	647	17915	2.64083	7.23307e-26	1.00612e-22	3.24555e-24	1.19083e-22
GOTERM_BP_3	GO:0050803~regulation of synapse structure or activity	81	1405	280	17915	3.68865	2.21894e-25	3.08655e-22	9.64547e-24	3.65321e-22
GOTERM_BP_3	GO:0050804~modulation of synaptic transmission	89	1405	332	17915	3.41816	2.88081e-25	4.0072e-22	1.2143e-23	4.74288e-22
GOTERM_BP_3	GO:0051962~positive regulation of nervous system development	120	1405	559	17915	2.73722	1.37845e-24	1.91743e-21	5.6395e-23	2.26945e-21
GOTERM_BP_3	GO:0051093~negative regulation of developmental process	156	1405	845	17915	2.35401	1.51523e-24	2.10768e-21	6.02195e-23	2.49463e-21
GOTERM_BP_3	GO:0031325~positive regulation of cellular metabolic process	358	1405	2769	17915	1.64854	1.97113e-24	2.74184e-21	7.61623e-23	3.24521e-21
GOTERM_BP_3	GO:0009891~positive regulation of biosynthetic process	254	1405	1744	17915	1.85707	7.43883e-24	1.03474e-20	2.7966e-22	1.22471e-20
GOTERM_BP_3	GO:0042127~regulation of cell proliferation	242	1405	1642	17915	1.87924	2.17827e-23	3.02997e-20	7.9736e-22	3.58624e-20
GOTERM_BP_3	GO:0022603~regulation of anatomical structure morphogenesis	175	1405	1033	17915	2.16012	3.29686e-23	4.58593e-20	1.17588e-21	5.42785e-20
GOTERM_BP_3	GO:0044765~single-organism transport	387	1405	3128	17915	1.57756	5.71647e-23	7.95161e-20	1.9879e-21	9.41144e-20
GOTERM_BP_3	GO:0009893~positive regulation of metabolic process	374	1405	3004	17915	1.58749	1.375e-22	1.91262e-19	4.66493e-21	2.26376e-19
GOTERM_BP_3	GO:0051173~positive regulation of nitrogen compound metabolic process	250	1405	1742	17915	1.82992	1.46475e-22	2.03746e-19	4.8511e-21	2.41152e-19
GOTERM_BP_3	GO:0023056~positive regulation of signaling	224	1405	1497	17915	1.90795	1.94485e-22	2.70529e-19	6.29138e-21	3.20195e-19
GOTERM_BP_3	GO:0042391~regulation of membrane potential	92	1405	385	17915	3.04697	2.70859e-22	3.76765e-19	8.56284e-21	4.45935e-19
GOTERM_BP_3	GO:0016477~cell migration	191	1405	1199	17915	2.03121	3.73908e-22	5.20106e-19	1.15579e-20	6.15591e-19
GOTERM_BP_3	GO:0010647~positive regulation of cell communication	222	1405	1490	17915	1.8998	5.40733e-22	7.52159e-19	1.63513e-20	8.90248e-19
GOTERM_BP_3	GO:0048839~inner ear development	65	1405	212	17915	3.90947	5.86536e-22	8.15871e-19	1.7359e-20	9.65656e-19
GOTERM_BP_3	GO:0050808~synapse organization	69	1405	238	17915	3.69669	9.19873e-22	1.27954e-18	2.66572e-20	1.51445e-18
GOTERM_BP_3	GO:0006928~movement of cell or subcellular component	245	1405	1724	17915	1.81205	1.63808e-21	2.27856e-18	4.65013e-20	2.69688e-18
GOTERM_BP_3	GO:0034762~regulation of transmembrane transport	93	1405	403	17915	2.94251	2.0578e-21	2.8624e-18	5.72481e-20	3.38791e-18
GOTERM_BP_3	GO:0051049~regulation of transport	255	1405	1828	17915	1.77871	2.64215e-21	3.67523e-18	7.20633e-20	4.34996e-18
GOTERM_BP_3	GO:0032989~cellular component morphogenesis	208	1405	1382	17915	1.91909	4.18849e-21	5.82618e-18	1.12042e-19	6.89581e-18
GOTERM_BP_3	GO:0055085~transmembrane transport	166	1405	1001	17915	2.11453	4.86792e-21	6.77128e-18	1.2776e-19	8.01441e-18
GOTERM_BP_3	GO:0048523~negative regulation of cellular process	494	1405	4417	17915	1.42607	1.76944e-20	2.46129e-17	4.55795e-19	2.91316e-17
GOTERM_BP_3	GO:0048870~cell motility	202	1405	1348	17915	1.91074	2.87613e-20	4.0007e-17	7.27401e-19	4.73519e-17
GOTERM_BP_3	GO:0048732~gland development	102	1405	488	17915	2.66514	4.32295e-20	6.01322e-17	1.07379e-18	7.11718e-17
GOTERM_BP_3	GO:0010604~positive regulation of macromolecule metabolic process	344	1405	2794	17915	1.5699	8.92252e-20	1.24112e-16	2.17741e-18	1.46898e-16
GOTERM_BP_3	GO:0045596~negative regulation of cell differentiation	137	1405	781	17915	2.23671	1.49409e-19	2.07828e-16	3.58324e-18	2.45983e-16
GOTERM_BP_3	GO:0010721~negative regulation of cell development	83	1405	361	17915	2.93164	4.43807e-19	6.17335e-16	1.04633e-17	7.30671e-16
GOTERM_BP_3	GO:0044057~regulation of system process	102	1405	504	17915	2.58054	4.74326e-19	6.59788e-16	1.09965e-17	7.80918e-16
GOTERM_BP_3	GO:0001822~kidney development	74	1405	301	17915	3.13477	8.45851e-19	1.17658e-15	1.92882e-17	1.39259e-15
GOTERM_BP_3	GO:0001763~morphogenesis of a branching structure	65	1405	241	17915	3.43904	9.02648e-19	1.25558e-15	2.02513e-17	1.48609e-15
GOTERM_BP_3	GO:0071804~cellular potassium ion transport	50	1405	152	17915	4.19437	1.87515e-18	2.60834e-15	4.14022e-17	3.0872e-15
GOTERM_BP_3	GO:0001503~ossification	87	1405	399	17915	2.78027	1.98374e-18	2.75938e-15	4.31153e-17	3.26597e-15
GOTERM_BP_3	GO:0007507~heart development	112	1405	603	17915	2.36832	6.15613e-18	8.56318e-15	1.31741e-16	1.01353e-14
GOTERM_BP_3	GO:0048565~digestive tract development	48	1405	145	17915	4.22098	7.25474e-18	1.00913e-14	1.52899e-16	1.1944e-14
GOTERM_BP_3	GO:0009966~regulation of signal transduction	306	1405	2468	17915	1.58094	7.32629e-18	1.01909e-14	1.52103e-16	1.20618e-14
GOTERM_BP_3	GO:0048589~developmental growth	124	1405	714	17915	2.21444	2.11479e-17	2.94167e-14	4.32599e-16	3.48173e-14
GOTERM_BP_3	GO:0035107~appendage morphogenesis	52	1405	174	17915	3.81061	3.49892e-17	4.86699e-14	7.05361e-16	5.76052e-14
GOTERM_BP_3	GO:0048608~reproductive structure development	96	1405	490	17915	2.49813	5.17213e-17	7.19443e-14	1.02778e-15	8.51525e-14
GOTERM_BP_3	GO:0048736~appendage development	55	1405	197	17915	3.55989	1.04786e-16	1.54432e-13	2.22045e-15	1.77636e-13
GOTERM_BP_3	GO:0009889~regulation of biosynthetic process	460	1405	4197	17915	1.39752	1.53597e-16	1.54432e-13	2.10942e-15	1.77636e-13
GOTERM_BP_3	GO:0072028~nephron morphogenesis	35	1405	86	17915	5.18932	2.78254e-16	4.63296e-13	6.32827e-15	5.44009e-13
GOTERM_BP_3	GO:0072006~nephron development	47	1405	152	17915	3.94271	4.27535e-16	6.17728e-13	8.32667e-15	7.32747e-13
GOTERM_BP_3	GO:0061061~muscle structure development	113	1405	645	17915	2.23388	5.60401e-16	7.7216e-13	1.03251e-14	9.10383e-13
GOTERM_BP_3	GO:0003013~circulatory system process	89	1405	450	17915	2.52184	6.56321e-16	9.26592e-13	1.22125e-14	1.09912e-12
GOTERM_BP_3	GO:0021537~telencephalon development	64	1405	267	17915	3.05639	1.16589e-15	1.69875e-12	2.20934e-14	2.0095e-12
GOTERM_BP_3	GO:0021536~diencephalon development	34	1405	85	17915	5.10036	1.6527e-15	2.31648e-12	2.9754e-14	2.74225e-12
GOTERM_BP_3	GO:0010720~positive regulation of cell development	105	1405	595	17915	2.25016	4.09454e-15	5.71398e-12	7.22755e-14	6.76126e-12
GOTERM_BP_3	GO:0031323~regulation of cellular metabolic process	578	1405	5673	17915	1.29914	5.33e-15	7.41274e-12	9.27036e-14	8.77076e-12
GOTERM_BP_3	GO:0051961~negative regulation of nervous system development	70	1405	320	17915	2.78926	6.46371e-15	8.95706e-12	1.10578e-13	1.06026e-11
GOTERM_BP_3	GO:0007611~learning or memory	63	1405	271	17915	2.96423	8.89206e-15	1.23546e-11	1.50657e-13	1.46216e-11
GOTERM_BP_3	GO:0008285~negative regulation of cell proliferation	110	1405	649	17915	2.16117	1.43664e-14	1.99217e-11	2.4003e-13	2.35811e-11
GOTERM_BP_3	GO:0048638~regulation of developmental growth	74	1405	356	17915	2.65047	1.65436e-14	2.30104e-11	2.73892e-13	2.72338e-11
GOTERM_BP_3	GO:0080090~regulation of primary metabolic process	571	1405	5629	17915	1.29344	2.45607e-14	3.41295e-11	4.01568e-13	4.03899e-11
GOTERM_BP_3	GO:0001505~regulation of neurotransmitter levels	49	1405	181	17915	3.4519	2.6367e-14	3.66004e-11	4.25548e-13	4.33209e-11
GOTERM_BP_3	GO:0032940~secretion by cell	141	1405	935	17915	1.92286	3.2189e-14	4.47853e-11	5.1481e-13	5.3002e-11
GOTERM_BP_3	GO:0051171~regulation of nitrogen compound metabolic process	450	1405	4221	17915	1.35937	3.84363e-14	5.34335e-11	6.07181e-13	6.32383e-11
GOTERM_BP_3	GO:0009890~negative regulation of biosynthetic process	206	1405	1595	17915	1.64682	2.36817e-13	3.29404e-10	3.70115e-12	3.89877e-10
GOTERM_BP_3	GO:0050806~positive regulation of synaptic transmission	42	1405	147	17915	3.64311	3.28083e-13	4.56347e-10	5.0705e-12	5.40124e-10
GOTERM_BP_3	GO:0060255~regulation of macromolecule metabolic process	574	1405	5739	17915	1.27531	3.56595e-13	4.96036e-10	5.45097e-12	5.87097e-10
GOTERM_BP_3	GO:1903530~regulation of secretion by cell	112	1405	699	17915	2.04306	3.83621e-13	5.33563e-10	5.79958e-12	6.31517e-10
GOTERM_BP_3	GO:0006935~chemotaxis	93	1405	536	17915	2.21237	4.99408e-13	6.94635e-10	7.46925e-12	8.22165e-10
GOTERM_BP_3	GO:0042330~taxis	93	1405	538	17915	2.20415	6.23858e-13	8.67754e-10	9.23139e-12	1.02707e-09
GOTERM_BP_3	GO:0030534~adult behavior	46	1405	176	17915	3.33262	6.92972e-13	9.63965e-10	1.0147e-11	1.14094e-09
GOTERM_BP_3	GO:0007165~signal transduction	574	1405	5763	17915	1.27	7.83247e-13	1.08952e-09	1.13491e-11	1.28955e-09
GOTERM_BP_3	GO:0050673~epithelial cell proliferation	73	1405	377	17915	2.46901	1.01523e-12	1.41213e-09	1.4558e-11	1.67137e-09
GOTERM_BP_3	GO:0010817~regulation of hormone levels	89	1405	509	17915	2.22953	1.08037e-12	1.50278e-09	1.53345e-11	1.77867e-09
GOTERM_BP_3	GO:0009967~positive regulation of signal transduction	177	1405	1328	17915	1.69948	1.13024e-12	1.57212e-09	1.588e-11	1.86074e-09
GOTERM_BP_3	GO:0007548~sex differentiation	64	1405	310	17915	2.63244	1.62089e-12	2.25471e-09	2.25471e-11	2.66864e-09
GOTERM_BP_3	GO:0051963~regulation of synapse assembly	31	1405	88	17915	4.49179	1.69532e-12	2.35818e-09	2.33483e-11	2.79111e-09
GOTERM_BP_3	GO:0061351~neural precursor cell proliferation	43	1405	161	17915	3.40552	1.96917e-12	2.73916e-09	2.68545e-11	3.24204e-09
GOTERM_BP_3	GO:0003006~developmental process involved in reproduction	124	1405	829	17915	1.90725	2.50509e-12	3.4846e-09	3.38312e-11	4.12433e-09
GOTERM_BP_3	GO:0030278~regulation of ossification	51	1405	217	17915	2.99675	2.64652e-12	3.68135e-09	3.53976e-11	4.3572e-09
GOTERM_BP_3	GO:0023057~negative regulation of signaling	159	1405	1164	17915	1.74175	2.76944e-12	3.85231e-09	3.66887e-11	4.55955e-09
GOTERM_BP_3	GO:0001568~blood vessel development	103	1405	641	17915	2.04889	3.21386e-12	4.4705e-09	4.21745e-11	5.29123e-09
GOTERM_BP_3	GO:0010648~negative regulation of cell communication	158	1405	1160	17915	1.73676	4.14038e-12	5.75923e-09	5.38246e-11	6.81657e-09
GOTERM_BP_3	GO:0048584~positive regulation of response to stimulus	224	1405	1834	17915	1.55736	5.18664e-12	7.2146e-09	6.68019e-11	8.53912e-09
GOTERM_BP_3	GO:0008284~positive regulation of cell proliferation	135	1405	943	17915	1.82542	5.90157e-12	8.20914e-09	7.53132e-11	9.71625e-09
GOTERM_BP_3	GO:0051965~positive regulation of synapse assembly	27	1405	72	17915	4.78158	1.14316e-11	1.59012e-08	1.44557e-10	1.88205e-08
GOTERM_BP_3	GO:0045778~positive regulation of ossification	32	1405	100	17915	4.08028	1.24044e-11	1.72545e-08	1.55446e-10	2.04223e-08
GOTERM_BP_3	GO:0048514~blood vessel morphogenesis	89	1405	540	17915	2.10154	2.88948e-11	4.01928e-08	3.58864e-10	4.75717e-08
GOTERM_BP_3	GO:0072089~stem cell proliferation	35	1405	122	17915	3.65804	3.48946e-11	4.85384e-08	4.29544e-10	5.74496e-08
GOTERM_BP_3	GO:0051128~regulation of cellular component organization	273	1405	2399	17915	1.45102	4.17308e-11	5.80476e-08	5.09189e-10	6.87045e-08
GOTERM_BP_3	GO:0051270~regulation of cellular component movement	122	1405	846	17915	1.83878	4.42647e-11	6.15722e-08	5.3541e-10	7.28762e-08
GOTERM_BP_3	GO:0090066~regulation of anatomical structure size	88	1405	536	17915	2.09343	4.70609e-11	6.54617e-08	5.64325e-10	7.74798e-08
GOTERM_BP_3	GO:0051172~negative regulation of nitrogen compound metabolic process	198	1405	1605	17915	1.57301	5.31638e-11	7.39509e-08	6.32059e-10	8.75274e-08
GOTERM_BP_3	GO:0021700~developmental maturation	57	1405	280	17915	2.59572	5.43367e-11	7.55824e-08	6.40529e-10	8.94585e-08
GOTERM_BP_3	GO:0021517~ventral spinal cord development	23	1405	56	17915	5.23697	6.38032e-11	8.87502e-08	7.458e-10	1.05044e-07
GOTERM_BP_3	GO:0060348~bone development	45	1405	196	17915	2.9275	1.33835e-10	1.86165e-07	1.55137e-09	2.20342e-07
GOTERM_BP_3	GO:0051047~positive regulation of secretion	74	1405	427	17915	2.20976	1.64677e-10	2.29066e-07	1.89311e-09	2.7112e-07
GOTERM_BP_3	GO:0021516~dorsal spinal cord development	14	1405	20	17915	8.92562	1.83507e-10	2.55258e-07	2.09228e-09	3.0212e-07
GOTERM_BP_3	GO:0021675~nerve development	26	1405	75	17915	4.42031	2.08763e-10	2.90389e-07	2.36089e-09	3.43701e-07
GOTERM_BP_3	GO:0060021~palate development	29	1405	93	17915	3.97608	2.60417e-10	3.6224e-07	2.92129e-09	4.28743e-07
GOTERM_BP_3	GO:0071772~response to BMP	40	1405	165	17915	3.09112	2.99245e-10	4.1625e-07	3.33e-09	4.92669e-07
GOTERM_BP_3	GO:0030324~lung development	49	1405	231	17915	2.70473	3.33141e-10	4.63399e-07	3.67777e-09	5.48473e-07
GOTERM_BP_3	GO:0030902~hindbrain development	41	1405	173	17915	3.02189	3.60628e-10	5.01634e-07	3.94987e-09	5.93728e-07
GOTERM_BP_3	GO:0003206~cardiac chamber morphogenesis	36	1405	139	17915	3.30239	3.88754e-10	5.40757e-07	4.22467e-09	6.40034e-07
GOTERM_BP_3	GO:0033555~multicellular organismal response to stress	29	1405	95	17915	3.89238	4.50965e-10	6.27292e-07	4.86273e-09	7.42457e-07
GOTERM_BP_3	GO:0051050~positive regulation of transport	135	1405	1005	17915	1.71281	4.95068e-10	6.88639e-07	5.29722e-09	8.15066e-07
GOTERM_BP_3	GO:0030323~respiratory tube development	49	1405	234	17915	2.67006	5.27703e-10	7.34034e-07	5.60331e-09	8.68795e-07
GOTERM_BP_3	GO:0009611~response to wounding	83	1405	519	17915	2.03916	6.65208e-10	9.25303e-07	7.00988e-09	1.09518e-06
GOTERM_BP_3	GO:1903532~positive regulation of secretion by cell	69	1405	398	17915	2.21058	7.14708e-10	9.94159e-07	7.47488e-09	1.17668e-06
GOTERM_BP_3	GO:0006810~transport	436	1405	4325	17915	1.28541	7.25794e-10	1.00958e-06	7.53417e-09	1.19493e-06
GOTERM_BP_3	GO:0090287~regulation of cellular response to growth factor stimulus	49	1405	238	17915	2.62518	9.59602e-10	1.33481e-06	9.88746e-09	1.57986e-06
GOTERM_BP_3	GO:0035637~multicellular organismal signaling	32	1405	117	17915	3.48742	1.00618e-09	1.3996e-06	1.02912e-08	1.65655e-06
GOTERM_BP_3	GO:0071495~cellular response to endogenous stimulus	152	1405	1189	17915	1.63005	1.23429e-09	1.7169e-06	1.25321e-08	2.03211e-06
GOTERM_BP_3	GO:0032409~regulation of transporter activity	45	1405	210	17915	2.73233	1.37543e-09	1.91321e-06	1.38639e-08	2.26446e-06
GOTERM_BP_3	GO:0043270~positive regulation of ion transport	50	1405	250	17915	2.55018	1.76886e-09	2.46049e-06	1.77014e-08	2.91221e-06
GOTERM_BP_3	GO:0046883~regulation of hormone secretion	55	1405	290	17915	2.41827	1.83999e-09	2.55942e-06	1.82816e-08	3.0293e-06
GOTERM_BP_3	GO:0003012~muscle system process	64	1405	365	17915	2.23577	2.00377e-09	2.78723e-06	1.97676e-08	3.29894e-06
GOTERM_BP_3	GO:0001525~angiogenesis	73	1405	444	17915	2.09643	2.37153e-09	3.29879e-06	2.32309e-08	3.90442e-06
GOTERM_BP_3	GO:0003205~cardiac chamber development	41	1405	185	17915	2.82587	2.94432e-09	4.09555e-06	2.86402e-08	4.84745e-06
GOTERM_BP_3	GO:1903524~positive regulation of blood circulation	30	1405	109	17915	3.50942	3.12278e-09	4.34378e-06	3.01652e-08	5.14126e-06
GOTERM_BP_3	GO:0060560~developmental growth involved in morphogenesis	47	1405	231	17915	2.59434	3.27268e-09	4.55228e-06	3.13951e-08	5.38804e-06
GOTERM_BP_3	GO:0008217~regulation of blood pressure	41	1405	186	17915	2.81068	3.47219e-09	4.82981e-06	3.3081e-08	5.71652e-06
GOTERM_BP_3	GO:0021543~pallium development	40	1405	179	17915	2.84936	3.68035e-09	5.11935e-06	3.48256e-08	6.05923e-06
GOTERM_BP_3	GO:2000145~regulation of cell motility	109	1405	782	17915	1.7773	3.88215e-09	5.40005e-06	3.64869e-08	6.39146e-06
GOTERM_BP_3	GO:0045137~development of primary sexual characteristics	50	1405	256	17915	2.49041	4.03512e-09	5.61283e-06	3.76701e-08	6.64331e-06
GOTERM_BP_3	GO:0048639~positive regulation of developmental growth	41	1405	187	17915	2.79565	4.08873e-09	5.6874e-06	3.79161e-08	6.73157e-06
GOTERM_BP_3	GO:0031016~pancreas development	28	1405	98	17915	3.64311	4.74483e-09	6.60004e-06	4.3709e-08	7.81176e-06
GOTERM_BP_3	GO:0010463~mesenchymal cell proliferation	21	1405	57	17915	4.6977	4.84503e-09	6.73941e-06	4.43384e-08	7.97672e-06
GOTERM_BP_3	GO:0009892~negative regulation of metabolic process	279	1405	2579	17915	1.37941	4.88452e-09	6.79434e-06	4.44076e-08	8.04173e-06
GOTERM_BP_3	GO:0030901~midbrain development	26	1405	87	17915	3.81061	6.83462e-09	9.50692e-06	6.17335e-08	1.12523e-05
GOTERM_BP_3	GO:0010033~response to organic substance	313	1405	2972	17915	1.34288	7.37734e-09	1.02618e-05	6.62056e-08	1.21458e-05
GOTERM_BP_3	GO:1904888~cranial skeletal system development	22	1405	64	17915	4.38312	8.01115e-09	1.11435e-05	7.14328e-08	1.31893e-05
GOTERM_BP_3	GO:0060041~retina development in camera-type eye	39	1405	177	17915	2.80952	8.93903e-09	1.24341e-05	7.91986e-08	1.4717e-05
GOTERM_BP_3	GO:0060042~retina morphogenesis in camera-type eye	22	1405	65	17915	4.31569	1.09667e-08	1.52546e-05	9.65487e-08	1.80553e-05
GOTERM_BP_3	GO:0048585~negative regulation of response to stimulus	163	1405	1350	17915	1.53955	1.65951e-08	2.30835e-05	1.45181e-07	2.73216e-05
GOTERM_BP_3	GO:0003407~neural retina development	22	1405	67	17915	4.18686	2.0118e-08	2.79837e-05	1.74901e-07	3.31217e-05
GOTERM_BP_3	GO:0098609~cell-cell adhesion	138	1405	1101	17915	1.5982	2.67957e-08	3.72721e-05	2.31508e-07	4.41157e-05
GOTERM_BP_3	GO:0008344~adult locomotory behavior	28	1405	106	17915	3.36816	2.96972e-08	4.13079e-05	2.54992e-07	4.88926e-05
GOTERM_BP_3	GO:0070887~cellular response to chemical stimulus	277	1405	2607	17915	1.35481	3.1798e-08	4.423e-05	2.71356e-07	5.23513e-05
GOTERM_BP_3	GO:0035265~organ growth	37	1405	172	17915	2.74292	4.36563e-08	6.0724e-05	3.7028e-07	7.18745e-05
GOTERM_BP_3	GO:0046887~positive regulation of hormone secretion	33	1405	143	17915	2.94251	4.6822e-08	6.51273e-05	3.94724e-07	7.70864e-05
GOTERM_BP_3	GO:0008406~gonad development	47	1405	251	17915	2.38762	4.78765e-08	6.6594e-05	4.01182e-07	7.88225e-05
GOTERM_BP_3	GO:0003151~outflow tract morphogenesis	23	1405	77	17915	3.80871	6.09947e-08	8.48401e-05	5.08046e-07	0.00010042
GOTERM_BP_3	GO:0001890~placenta development	37	1405	175	17915	2.6959	6.94486e-08	9.65984e-05	5.75018e-07	0.000114338
GOTERM_BP_3	GO:0010605~negative regulation of macromolecule metabolic process	254	1405	2372	17915	1.3654	7.48415e-08	0.000104099	6.16003e-07	0.000123217
GOTERM_BP_3	GO:0048645~organ formation	21	1405	66	17915	4.0571	8.21339e-08	0.000114242	6.72048e-07	0.000135223
GOTERM_BP_3	GO:0031324~negative regulation of cellular metabolic process	254	1405	2380	17915	1.36081	1.01707e-07	0.000141464	8.27335e-07	0.000167447
GOTERM_BP_3	GO:0035148~tube formation	35	1405	165	17915	2.70473	1.52667e-07	0.000212337	1.23465e-06	0.000251347
GOTERM_BP_3	GO:0051271~negative regulation of cellular component movement	48	1405	269	17915	2.27525	1.53457e-07	0.000213436	1.23387e-06	0.000252648
GOTERM_BP_3	GO:0021602~cranial nerve morphogenesis	13	1405	26	17915	6.37544	1.75501e-07	0.000244093	1.403e-06	0.00028894
GOTERM_BP_3	GO:0040013~negative regulation of locomotion	48	1405	271	17915	2.25846	1.92595e-07	0.000267864	1.53085e-06	0.000317082
GOTERM_BP_3	GO:0023014~signal transduction by protein phosphorylation	94	1405	695	17915	1.72458	2.08604e-07	0.000290127	1.64868e-06	0.00034344
GOTERM_BP_3	GO:1901861~regulation of muscle tissue development	33	1405	153	17915	2.75019	2.46073e-07	0.00034223	1.93383e-06	0.000405128
GOTERM_BP_3	GO:0001892~embryonic placenta development	27	1405	111	17915	3.10157	3.23446e-07	0.000449812	2.5276e-06	0.000532511
GOTERM_BP_3	GO:0072189~ureter development	10	1405	15	17915	8.50059	3.52694e-07	0.000490478	2.74077e-06	0.000580665
GOTERM_BP_3	GO:0001704~formation of primary germ layer	28	1405	120	17915	2.97521	4.5867e-07	0.000637806	3.54449e-06	0.000755138
GOTERM_BP_3	GO:0009968~negative regulation of signal transduction	125	1405	1025	17915	1.55499	6.0743e-07	0.000844579	4.66814e-06	0.00100005
GOTERM_BP_3	GO:0060688~regulation of morphogenesis of a branching structure	19	1405	62	17915	3.90753	7.37967e-07	0.00102599	5.64017e-06	0.00121496
GOTERM_BP_3	GO:0044093~positive regulation of molecular function	148	1405	1270	17915	1.48593	7.44769e-07	0.00103544	5.66104e-06	0.00122616
GOTERM_BP_3	GO:0050886~endocrine process	25	1405	103	17915	3.09488	1.00642e-06	0.00139895	7.6083e-06	0.00165693
GOTERM_BP_3	GO:0010469~regulation of receptor activity	26	1405	111	17915	2.98669	1.18557e-06	0.00164777	8.91418e-06	0.00195187
GOTERM_BP_3	GO:0043062~extracellular structure organization	41	1405	229	17915	2.28291	1.27642e-06	0.00177392	9.54565e-06	0.00210144
GOTERM_BP_3	GO:0040019~positive regulation of embryonic development	14	1405	37	17915	4.82466	2.37878e-06	0.00330342	1.76944e-05	0.00391629
GOTERM_BP_3	GO:0001964~startle response	13	1405	32	17915	5.18005	2.63347e-06	0.00365646	1.94847e-05	0.00433558
GOTERM_BP_3	GO:0043084~penile erection	9	1405	14	17915	8.197	2.72937e-06	0.00378937	2.00874e-05	0.00449347
GOTERM_BP_3	GO:0022037~metencephalon development	27	1405	124	17915	2.7764	3.05841e-06	0.00424521	2.23905e-05	0.00503515
GOTERM_BP_3	GO:0046620~regulation of organ growth	24	1405	102	17915	3.00021	3.06908e-06	0.00426	2.23511e-05	0.00505273
GOTERM_BP_3	GO:2000146~negative regulation of cell motility	41	1405	238	17915	2.19658	3.44879e-06	0.00478578	2.49855e-05	0.00567783
GOTERM_BP_3	GO:0010842~retina layer formation	11	1405	23	17915	6.09825	3.75165e-06	0.00520497	2.70388e-05	0.00617644
GOTERM_BP_3	GO:0070169~positive regulation of biomineral tissue development	15	1405	44	17915	4.34689	3.77779e-06	0.00524113	2.70868e-05	0.00621947
GOTERM_BP_3	GO:0002027~regulation of heart rate	22	1405	89	17915	3.15191	3.79804e-06	0.00526915	2.70924e-05	0.0062528
GOTERM_BP_3	GO:0061036~positive regulation of cartilage development	13	1405	33	17915	5.02308	3.84399e-06	0.00533273	2.72803e-05	0.00632845
GOTERM_BP_3	GO:0007588~excretion	16	1405	51	17915	4.00028	5.14171e-06	0.00712662	3.63046e-05	0.00846483
GOTERM_BP_3	GO:0045927~positive regulation of growth	45	1405	277	17915	2.07144	5.28094e-06	0.00731889	3.70994e-05	0.00869404
GOTERM_BP_3	GO:0051130~positive regulation of cellular component organization	142	1405	1253	17915	1.44503	5.67846e-06	0.00786764	3.96914e-05	0.00934844
GOTERM_BP_3	GO:0048286~lung alveolus development	17	1405	58	17915	3.73733	6.31012e-06	0.00873899	4.3886e-05	0.0103883
GOTERM_BP_3	GO:0021766~hippocampus development	21	1405	86	17915	3.11359	8.11934e-06	0.0112305	5.61877e-05	0.0133666
GOTERM_BP_3	GO:0045933~positive regulation of muscle contraction	15	1405	47	17915	4.06943	8.9817e-06	0.0124159	6.18476e-05	0.0147862
GOTERM_BP_3	GO:0060065~uterus development	11	1405	25	17915	5.61039	9.26734e-06	0.0128082	6.35001e-05	0.0152564
GOTERM_BP_3	GO:0031018~endocrine pancreas development	17	1405	60	17915	3.61275	1.01645e-05	0.0140395	6.93062e-05	0.0167333
GOTERM_BP_3	GO:0021575~hindbrain morphogenesis	16	1405	54	17915	3.77804	1.11555e-05	0.0153976	7.56918e-05	0.0183645
GOTERM_BP_3	GO:0048588~developmental cell growth	37	1405	215	17915	2.19434	1.13703e-05	0.0156918	7.67749e-05	0.0187182
GOTERM_BP_3	GO:0048636~positive regulation of muscle organ development	19	1405	75	17915	3.23023	1.43283e-05	0.0197335	9.62794e-05	0.0235871
GOTERM_BP_3	GO:0048640~negative regulation of developmental growth	23	1405	104	17915	2.81991	1.48463e-05	0.0204396	9.92807e-05	0.0244398
GOTERM_BP_3	GO:1901863~positive regulation of muscle tissue development	19	1405	76	17915	3.18772	1.7415e-05	0.0239334	0.0001159	0.0286676
GOTERM_BP_3	GO:0045785~positive regulation of cell adhesion	53	1405	366	17915	1.84644	2.03913e-05	0.027966	0.00013506	0.0335663
GOTERM_BP_3	GO:0044089~positive regulation of cellular component biogenesis	61	1405	443	17915	1.75577	2.11586e-05	0.029003	0.000139478	0.0348292
GOTERM_BP_3	GO:0040017~positive regulation of locomotion	64	1405	474	17915	1.72164	2.41477e-05	0.033032	0.00015843	0.0397486
GOTERM_BP_3	GO:0071559~response to transforming growth factor beta	35	1405	205	17915	2.17698	2.41751e-05	0.0330688	0.000157865	0.0397937
GOTERM_BP_3	GO:0046622~positive regulation of organ growth	15	1405	51	17915	3.75026	2.52495e-05	0.0345128	0.00016411	0.0415619
GOTERM_BP_3	GO:0048806~genitalia development	15	1405	51	17915	3.75026	2.52495e-05	0.0345128	0.00016411	0.0415619
GOTERM_BP_3	GO:0090184~positive regulation of kidney development	14	1405	45	17915	3.96694	2.69626e-05	0.0368109	0.000174429	0.0443812
GOTERM_BP_3	GO:0044249~cellular biosynthetic process	519	1405	5732	17915	1.15452	2.79687e-05	0.0381579	0.000180099	0.0460369
GOTERM_BP_3	GO:0001759~organ induction	10	1405	23	17915	5.54387	3.23309e-05	0.0439767	0.000207227	0.0532154
GOTERM_BP_3	GO:0051954~positive regulation of amine transport	12	1405	34	17915	4.50031	3.48182e-05	0.0472787	0.000222145	0.0573082
GOTERM_BP_3	GO:1901576~organic substance biosynthetic process	526	1405	5830	17915	1.15042	3.56665e-05	0.0484024	0.000226518	0.0587042
GOTERM_BP_3	GO:0060405~regulation of penile erection	7	1405	10	17915	8.92562	3.65432e-05	0.0495621	0.00023103	0.0601466
GOTERM_BP_3	GO:0060411~cardiac septum morphogenesis	18	1405	74	17915	3.10157	4.50309e-05	0.0607178	0.000283396	0.0741118
GOTERM_BP_3	GO:0050878~regulation of body fluid levels	50	1405	349	17915	1.82678	4.76944e-05	0.0641916	0.000298805	0.0784938
GOTERM_BP_3	GO:0021549~cerebellum development	23	1405	112	17915	2.61849	4.96908e-05	0.0667869	0.000309915	0.0817782
GOTERM_BP_3	GO:0009581~detection of external stimulus	24	1405	120	17915	2.55018	5.06428e-05	0.0680219	0.000314441	0.0833443
GOTERM_BP_3	GO:0048534~hematopoietic or lymphoid organ development	108	1405	940	17915	1.465	5.15872e-05	0.0692454	0.000318881	0.0848978
GOTERM_BP_3	GO:0010941~regulation of cell death	170	1405	1620	17915	1.33806	5.22935e-05	0.0701594	0.000321816	0.0860597
GOTERM_BP_3	GO:0001558~regulation of cell growth	56	1405	410	17915	1.74158	6.05896e-05	0.0808286	0.00037122	0.0997063
GOTERM_BP_3	GO:0050805~negative regulation of synaptic transmission	17	1405	69	17915	3.14152	6.63499e-05	0.0881645	0.000404724	0.109181
GOTERM_BP_3	GO:0032941~secretion by tissue	20	1405	91	17915	2.80239	6.71705e-05	0.0892049	0.00040794	0.11053
GOTERM_BP_3	GO:2000147~positive regulation of cell motility	61	1405	461	17915	1.68721	6.88709e-05	0.0913567	0.000416447	0.113327
GOTERM_BP_3	GO:0021854~hypothalamus development	10	1405	25	17915	5.10036	7.00082e-05	0.0927932	0.00042149	0.115197
GOTERM_BP_3	GO:0090102~cochlea development	14	1405	49	17915	3.64311	7.21899e-05	0.0955423	0.00043275	0.118785
GOTERM_BP_3	GO:0051272~positive regulation of cellular component movement	62	1405	472	17915	1.67491	7.37e-05	0.0974404	0.000439905	0.121269
GOTERM_BP_3	GO:0009725~response to hormone	96	1405	822	17915	1.48915	7.59457e-05	0.100256	0.00045137	0.124962
GOTERM_BP_3	GO:0021587~cerebellum morphogenesis	14	1405	50	17915	3.57025	9.06218e-05	0.118439	0.000536284	0.149093
GOTERM_BP_3	GO:0016049~cell growth	61	1405	466	17915	1.66911	9.33487e-05	0.121776	0.000550078	0.153576
GOTERM_BP_3	GO:0006793~phosphorus metabolic process	277	1405	2873	17915	1.22938	9.52896e-05	0.124145	0.000559144	0.156767
GOTERM_BP_3	GO:0071774~response to fibroblast growth factor	21	1405	101	17915	2.65118	9.56603e-05	0.124596	0.000558961	0.157376
GOTERM_BP_3	GO:0042493~response to drug	59	1405	447	17915	1.683	9.83279e-05	0.127839	0.000572141	0.161761
GOTERM_BP_3	GO:0001945~lymph vessel development	10	1405	26	17915	4.90419	9.96577e-05	0.129451	0.000577461	0.163947
GOTERM_BP_3	GO:0090288~negative regulation of cellular response to growth factor stimulus	24	1405	126	17915	2.42874	0.00011075	0.142781	0.000639055	0.182179
GOTERM_BP_3	GO:0051048~negative regulation of secretion	37	1405	239	17915	1.97399	0.000113115	0.145596	0.000650002	0.186066
GOTERM_BP_3	GO:0051051~negative regulation of transport	65	1405	510	17915	1.62511	0.000115635	0.148587	0.000661747	0.190208
GOTERM_BP_3	GO:0032370~positive regulation of lipid transport	15	1405	58	17915	3.29764	0.000117945	0.151318	0.000672197	0.194004
GOTERM_BP_3	GO:0043271~negative regulation of ion transport	24	1405	127	17915	2.40962	0.000125388	0.160061	0.000711688	0.206235
GOTERM_BP_3	GO:0021987~cerebral cortex development	23	1405	119	17915	2.46446	0.000127651	0.162701	0.000721586	0.209954
GOTERM_BP_3	GO:0009582~detection of abiotic stimulus	23	1405	119	17915	2.46446	0.000127651	0.162701	0.000721586	0.209954
GOTERM_BP_3	GO:0060406~positive regulation of penile erection	6	1405	8	17915	9.56317	0.000134452	0.170585	0.00075694	0.221128
GOTERM_BP_3	GO:0007618~mating	14	1405	52	17915	3.43293	0.000139954	0.17691	0.000784732	0.230168
GOTERM_BP_3	GO:2000833~positive regulation of steroid hormone secretion	7	1405	12	17915	7.43802	0.000140127	0.177108	0.000782545	0.230451
GOTERM_BP_3	GO:0003207~cardiac chamber formation	7	1405	12	17915	7.43802	0.000140127	0.177108	0.000782545	0.230451
GOTERM_BP_3	GO:0007632~visual behavior	16	1405	66	17915	3.09112	0.000141647	0.178847	0.000787871	0.232949
GOTERM_BP_3	GO:0060711~labyrinthine layer development	15	1405	59	17915	3.24175	0.000143616	0.181093	0.000795638	0.236184
GOTERM_BP_3	GO:2000243~positive regulation of reproductive process	15	1405	59	17915	3.24175	0.000143616	0.181093	0.000795638	0.236184
GOTERM_BP_3	GO:0021915~neural tube development	31	1405	189	17915	2.09142	0.000160292	0.199872	0.000884464	0.263573
GOTERM_BP_3	GO:0021988~olfactory lobe development	13	1405	46	17915	3.60351	0.000162161	0.201951	0.000891242	0.266644
GOTERM_BP_3	GO:0009791~post-embryonic development	25	1405	138	17915	2.30994	0.000173038	0.213935	0.000947253	0.284504
GOTERM_BP_3	GO:0050920~regulation of chemotaxis	32	1405	199	17915	2.05039	0.000178116	0.21947	0.000971222	0.292842
GOTERM_BP_3	GO:0021696~cerebellar cortex morphogenesis	12	1405	40	17915	3.82527	0.000181675	0.223324	0.000986749	0.298684
GOTERM_BP_3	GO:0032101~regulation of response to external stimulus	89	1405	769	17915	1.47572	0.000195988	0.238637	0.00106032	0.32218
GOTERM_BP_3	GO:0021695~cerebellar cortex development	15	1405	61	17915	3.13546	0.000209723	0.253049	0.0011302	0.344724
GOTERM_BP_3	GO:0051147~regulation of muscle cell differentiation	30	1405	183	17915	2.09031	0.000210499	0.253855	0.00113	0.345997
GOTERM_BP_3	GO:0032102~negative regulation of response to external stimulus	40	1405	275	17915	1.85467	0.000219969	0.263621	0.00117627	0.361536
GOTERM_BP_3	GO:0010243~response to organonitrogen compound	99	1405	878	17915	1.43774	0.000221162	0.264842	0.00117812	0.363492
GOTERM_BP_3	GO:0048266~behavioral response to pain	9	1405	23	17915	4.98948	0.000234969	0.27883	0.00124686	0.386145
GOTERM_BP_3	GO:0021683~cerebellar granular layer morphogenesis	7	1405	13	17915	6.86586	0.00024298	0.286823	0.00128444	0.399284
GOTERM_BP_3	GO:0046888~negative regulation of hormone secretion	20	1405	100	17915	2.55018	0.000249198	0.292967	0.00131231	0.409483
GOTERM_BP_3	GO:2000021~regulation of ion homeostasis	32	1405	203	17915	2.00999	0.0002561	0.299724	0.00134355	0.420802
GOTERM_BP_3	GO:1900273~positive regulation of long-term synaptic potentiation	8	1405	18	17915	5.66706	0.000263079	0.306491	0.00137496	0.432247
GOTERM_BP_3	GO:0009612~response to mechanical stimulus	35	1405	232	17915	1.92363	0.000293135	0.334895	0.00152621	0.481516
GOTERM_BP_3	GO:1904018~positive regulation of vasculature development	26	1405	152	17915	2.18107	0.000313921	0.353856	0.00162827	0.515578
GOTERM_BP_3	GO:0001666~response to hypoxia	42	1405	299	17915	1.79109	0.000316336	0.356023	0.00163469	0.519534
GOTERM_BP_3	GO:0055017~cardiac muscle tissue growth	18	1405	86	17915	2.66879	0.000318691	0.358131	0.00164077	0.523394
GOTERM_BP_3	GO:0019725~cellular homeostasis	97	1405	866	17915	1.42822	0.000323869	0.362738	0.00166125	0.531875
GOTERM_BP_3	GO:0001942~hair follicle development	20	1405	102	17915	2.50017	0.000324699	0.363474	0.00165939	0.533236
GOTERM_BP_3	GO:0030431~sleep	11	1405	36	17915	3.89611	0.000324947	0.363694	0.00165458	0.533642
GOTERM_BP_3	GO:0035640~exploration behavior	10	1405	30	17915	4.2503	0.000342698	0.379217	0.00173854	0.562716
GOTERM_BP_3	GO:0042592~homeostatic process	172	1405	1707	17915	1.2848	0.000362583	0.396159	0.00183266	0.595276
GOTERM_BP_3	GO:0022404~molting cycle process	20	1405	103	17915	2.4759	0.000369411	0.401869	0.00186039	0.606453
GOTERM_BP_3	GO:0090185~negative regulation of kidney development	8	1405	19	17915	5.3688	0.000388482	0.417534	0.0019493	0.637669
GOTERM_BP_3	GO:0021984~adenohypophysis development	7	1405	14	17915	6.37544	0.000397063	0.424447	0.00198517	0.651711
GOTERM_BP_3	GO:0045926~negative regulation of growth	37	1405	255	17915	1.85013	0.000411371	0.435794	0.00204928	0.675121
GOTERM_BP_3	GO:0034764~positive regulation of transmembrane transport	24	1405	138	17915	2.21755	0.000441599	0.459034	0.00219188	0.724559
GOTERM_BP_3	GO:0036342~post-anal tail morphogenesis	9	1405	25	17915	4.59032	0.000449971	0.465301	0.00222546	0.738248
GOTERM_BP_3	GO:0021772~olfactory bulb development	12	1405	44	17915	3.47752	0.000450725	0.465861	0.00222129	0.739481
GOTERM_BP_3	GO:0042713~sperm ejaculation	5	1405	6	17915	10.6257	0.000495419	0.498072	0.00243272	0.812528
GOTERM_BP_3	GO:1901700~response to oxygen-containing compound	168	1405	1670	17915	1.28272	0.00049667	0.498945	0.00243028	0.814571
GOTERM_BP_3	GO:1901615~organic hydroxy compound metabolic process	49	1405	375	17915	1.66612	0.000514813	0.511438	0.00251014	0.844208
GOTERM_BP_3	GO:1902742~apoptotic process involved in development	11	1405	38	17915	3.69105	0.000523249	0.51714	0.00254232	0.857986
GOTERM_BP_3	GO:0008219~cell death	196	1405	2003	17915	1.24772	0.000590675	0.560392	0.00285957	0.968042
GOTERM_BP_3	GO:1901698~response to nitrogen compound	108	1405	1004	17915	1.37161	0.000631062	0.584422	0.00304426	1.03391
GOTERM_BP_3	GO:0048857~neural nucleus development	14	1405	60	17915	2.97521	0.000632792	0.585421	0.00304205	1.03673
GOTERM_BP_3	GO:0071695~anatomical structure maturation	14	1405	60	17915	2.97521	0.000632792	0.585421	0.00304205	1.03673
GOTERM_BP_3	GO:0003279~cardiac septum development	21	1405	117	17915	2.28862	0.000730086	0.637931	0.00349705	1.19523
GOTERM_BP_3	GO:0044702~single organism reproductive process	154	1405	1525	17915	1.28763	0.000757135	0.651311	0.00361398	1.23926
GOTERM_BP_3	GO:0007164~establishment of tissue polarity	13	1405	54	17915	3.06966	0.000797051	0.670157	0.00379122	1.30419
GOTERM_BP_3	GO:0003014~renal system process	19	1405	102	17915	2.37517	0.000899332	0.713934	0.00426234	1.47038
GOTERM_BP_3	GO:0060174~limb bud formation	6	1405	11	17915	6.95503	0.000907914	0.717332	0.00428834	1.48432
GOTERM_BP_3	GO:0021684~cerebellar granular layer formation	6	1405	11	17915	6.95503	0.000907914	0.717332	0.00428834	1.48432
GOTERM_BP_3	GO:0002118~aggressive behavior	6	1405	11	17915	6.95503	0.000907914	0.717332	0.00428834	1.48432
GOTERM_BP_3	GO:0030858~positive regulation of epithelial cell differentiation	13	1405	55	17915	3.01385	0.0009479	0.732639	0.00446173	1.54921
GOTERM_BP_3	GO:0048771~tissue remodeling	28	1405	182	17915	1.96168	0.000975332	0.742658	0.00457514	1.59371
GOTERM_BP_3	GO:0031589~cell-substrate adhesion	40	1405	297	17915	1.71729	0.00101968	0.758068	0.00476671	1.6656
GOTERM_BP_3	GO:0051148~negative regulation of muscle cell differentiation	14	1405	63	17915	2.83353	0.00102929	0.761284	0.00479544	1.68117
GOTERM_BP_3	GO:0016358~dendrite development	34	1405	239	17915	1.81393	0.00103286	0.762469	0.00479601	1.68697
GOTERM_BP_3	GO:0021697~cerebellar cortex formation	9	1405	28	17915	4.0985	0.00104658	0.766963	0.00484343	1.70919
GOTERM_BP_3	GO:0042321~negative regulation of circadian sleep/wake cycle, sleep	5	1405	7	17915	9.10778	0.00108409	0.778822	0.00500005	1.76994
GOTERM_BP_3	GO:0016337~single organismal cell-cell adhesion	82	1405	738	17915	1.41677	0.00119729	0.811079	0.00550278	1.95304
GOTERM_BP_3	GO:0009991~response to extracellular stimulus	56	1405	462	17915	1.54556	0.00122239	0.81757	0.00559941	1.99361
GOTERM_BP_3	GO:0001756~somitogenesis	15	1405	72	17915	2.65644	0.00123832	0.821571	0.00565358	2.01932
GOTERM_BP_3	GO:1903531~negative regulation of secretion by cell	31	1405	213	17915	1.85576	0.00124292	0.822712	0.005656	2.02676
GOTERM_BP_3	GO:0060627~regulation of vesicle-mediated transport	55	1405	453	17915	1.54812	0.00130372	0.837106	0.0059127	2.12491
GOTERM_BP_3	GO:0021681~cerebellar granular layer development	7	1405	17	17915	5.25037	0.00133334	0.843689	0.00602708	2.17268
GOTERM_BP_3	GO:0048791~calcium ion-regulated exocytosis of neurotransmitter	9	1405	29	17915	3.95717	0.00134712	0.846662	0.00606952	2.19491
GOTERM_BP_3	GO:0090130~tissue migration	34	1405	244	17915	1.77676	0.00146921	0.870642	0.00659682	2.39158
GOTERM_BP_3	GO:0048512~circadian behavior	14	1405	66	17915	2.70473	0.00161482	0.894394	0.0072255	2.62566
GOTERM_BP_3	GO:0042303~molting cycle	20	1405	116	17915	2.19843	0.00165102	0.899587	0.00736332	2.68377
GOTERM_BP_3	GO:0060351~cartilage development involved in endochondral bone morphogenesis	9	1405	30	17915	3.82527	0.00171237	0.907814	0.00761173	2.78217
GOTERM_BP_3	GO:0042749~regulation of circadian sleep/wake cycle	9	1405	30	17915	3.82527	0.00171237	0.907814	0.00761173	2.78217
GOTERM_BP_3	GO:0061054~dermatome development	4	1405	4	17915	12.7509	0.00180884	0.91941	0.00801366	2.93674
GOTERM_BP_3	GO:0021542~dentate gyrus development	7	1405	18	17915	4.95868	0.00186847	0.925835	0.00825071	3.03215
GOTERM_BP_3	GO:0050922~negative regulation of chemotaxis	12	1405	52	17915	2.94251	0.00199054	0.937438	0.00876012	3.22721
GOTERM_BP_3	GO:0007272~ensheathment of neurons	20	1405	118	17915	2.16117	0.00202416	0.940302	0.00887951	3.28087
GOTERM_BP_3	GO:0061303~cornea development in camera-type eye	5	1405	8	17915	7.96931	0.00203373	0.941093	0.00889335	3.29614
GOTERM_BP_3	GO:0044236~multicellular organism metabolic process	18	1405	101	17915	2.27244	0.00210034	0.946316	0.00915482	3.40235
GOTERM_BP_3	GO:0060324~face development	13	1405	60	17915	2.76269	0.00210251	0.946478	0.00913565	3.40581
GOTERM_BP_3	GO:0060548~negative regulation of cell death	108	1405	1042	17915	1.32159	0.00218418	0.952238	0.00945971	3.53588
GOTERM_BP_3	GO:0035815~positive regulation of renal sodium excretion	6	1405	13	17915	5.88503	0.00221468	0.954226	0.00956158	3.58441
GOTERM_BP_3	GO:0007320~insemination	6	1405	13	17915	5.88503	0.00221468	0.954226	0.00956158	3.58441
GOTERM_BP_3	GO:0051098~regulation of binding	41	1405	321	17915	1.62862	0.00237227	0.963255	0.0102076	3.83481
GOTERM_BP_3	GO:1901862~negative regulation of muscle tissue development	13	1405	61	17915	2.7174	0.00243438	0.966303	0.0104415	3.93333
GOTERM_BP_3	GO:0060384~innervation	8	1405	25	17915	4.08028	0.0024438	0.966743	0.0104496	3.94827
GOTERM_BP_3	GO:0003170~heart valve development	11	1405	46	17915	3.04913	0.00254198	0.970998	0.0108344	4.1038
GOTERM_BP_3	GO:0036303~lymph vessel morphogenesis	7	1405	19	17915	4.6977	0.00255154	0.971382	0.0108418	4.11892
GOTERM_BP_3	GO:0001946~lymphangiogenesis	7	1405	19	17915	4.6977	0.00255154	0.971382	0.0108418	4.11892
GOTERM_BP_3	GO:0060740~prostate gland epithelium morphogenesis	9	1405	32	17915	3.58619	0.00267463	0.975896	0.011328	4.31354
GOTERM_BP_3	GO:0032844~regulation of homeostatic process	57	1405	490	17915	1.48327	0.00275866	0.978562	0.0116469	4.44619
GOTERM_BP_3	GO:0045103~intermediate filament-based process	11	1405	47	17915	2.98425	0.00300641	0.984827	0.0126494	4.83626
GOTERM_BP_3	GO:0098602~single organism cell adhesion	85	1405	796	17915	1.36159	0.00306124	0.985944	0.0128402	4.92239
GOTERM_BP_3	GO:0006139~nucleobase-containing compound metabolic process	469	1405	5389	17915	1.1097	0.00328079	0.989653	0.013715	5.26653
GOTERM_BP_3	GO:0060512~prostate gland morphogenesis	9	1405	33	17915	3.47752	0.00329186	0.989812	0.0137199	5.28385
GOTERM_BP_3	GO:0032411~positive regulation of transporter activity	16	1405	88	17915	2.31834	0.00330108	0.989942	0.013717	5.29827
GOTERM_BP_3	GO:0010810~regulation of cell-substrate adhesion	26	1405	179	17915	1.85208	0.0033951	0.991179	0.0140637	5.44525
GOTERM_BP_3	GO:0060463~lung lobe morphogenesis	5	1405	9	17915	7.08383	0.00343436	0.991649	0.0141833	5.50656
GOTERM_BP_3	GO:0007442~hindgut morphogenesis	5	1405	9	17915	7.08383	0.00343436	0.991649	0.0141833	5.50656
GOTERM_BP_3	GO:0060462~lung lobe development	5	1405	9	17915	7.08383	0.00343436	0.991649	0.0141833	5.50656
GOTERM_BP_3	GO:0032231~regulation of actin filament bundle assembly	16	1405	89	17915	2.29229	0.00368934	0.99415	0.0151852	5.90381
GOTERM_BP_3	GO:0040018~positive regulation of multicellular organism growth	10	1405	41	17915	3.10997	0.00384031	0.995262	0.0157563	6.13828
GOTERM_BP_3	GO:0006725~cellular aromatic compound metabolic process	482	1405	5560	17915	1.10538	0.0038556	0.995362	0.0157722	6.16199
GOTERM_BP_3	GO:0002021~response to dietary excess	8	1405	27	17915	3.77804	0.00393263	0.995835	0.0160384	6.28139
GOTERM_BP_3	GO:0016079~synaptic vesicle exocytosis	14	1405	73	17915	2.44538	0.00409177	0.996665	0.0166346	6.52759
GOTERM_BP_3	GO:0051602~response to electrical stimulus	11	1405	49	17915	2.86244	0.00413697	0.996869	0.0167683	6.59742
GOTERM_BP_3	GO:0021603~cranial nerve formation	4	1405	5	17915	10.2007	0.00425792	0.997356	0.0172053	6.78401
GOTERM_BP_3	GO:0033002~muscle cell proliferation	27	1405	192	17915	1.79309	0.00434627	0.997663	0.0175091	6.92008
GOTERM_BP_3	GO:0040034~regulation of development, heterochronic	6	1405	15	17915	5.10036	0.00452768	0.998186	0.0181824	7.19891
GOTERM_BP_3	GO:0035264~multicellular organism growth	25	1405	174	17915	1.83202	0.00474632	0.998664	0.0189994	7.5339
GOTERM_BP_3	GO:0007585~respiratory gaseous exchange	11	1405	50	17915	2.8052	0.00481571	0.998787	0.0192199	7.63998
GOTERM_BP_3	GO:0045932~negative regulation of muscle contraction	8	1405	28	17915	3.64311	0.00489465	0.998914	0.0194769	7.76052
GOTERM_BP_3	GO:0032535~regulation of cellular component size	45	1405	377	17915	1.52199	0.00511346	0.9992	0.020283	8.09387
GOTERM_BP_3	GO:0031099~regeneration	27	1405	195	17915	1.76551	0.00534094	0.999418	0.0211181	8.43924
GOTERM_BP_3	GO:0030857~negative regulation of epithelial cell differentiation	10	1405	43	17915	2.96532	0.00536774	0.999439	0.0211632	8.47985
GOTERM_BP_3	GO:0090659~walking behavior	10	1405	43	17915	2.96532	0.00536774	0.999439	0.0211632	8.47985
GOTERM_BP_3	GO:0032835~glomerulus development	13	1405	67	17915	2.47405	0.00543067	0.999487	0.021349	8.57513
GOTERM_BP_3	GO:0060749~mammary gland alveolus development	7	1405	22	17915	4.0571	0.00572761	0.999661	0.0224432	9.02349
GOTERM_BP_3	GO:0048532~anatomical structure arrangement	7	1405	22	17915	4.0571	0.00572761	0.999661	0.0224432	9.02349
GOTERM_BP_3	GO:0061377~mammary gland lobule development	7	1405	22	17915	4.0571	0.00572761	0.999661	0.0224432	9.02349
GOTERM_BP_3	GO:0010632~regulation of epithelial cell migration	25	1405	177	17915	1.80097	0.00588488	0.999728	0.0229895	9.26012
GOTERM_BP_3	GO:0051969~regulation of transmission of nerve impulse	6	1405	16	17915	4.78158	0.0061659	0.999817	0.0240102	9.68151
GOTERM_BP_3	GO:0070482~response to oxygen levels	44	1405	371	17915	1.51223	0.00635168	0.999859	0.0246581	9.95907
GOTERM_BP_3	GO:1901360~organic cyclic compound metabolic process	492	1405	5731	17915	1.09465	0.00701085	0.999944	0.0271156	10.9374
GOTERM_BP_3	GO:0043576~regulation of respiratory gaseous exchange	7	1405	23	17915	3.88071	0.00724393	0.999959	0.0279302	11.281
GOTERM_BP_3	GO:0060561~apoptotic process involved in morphogenesis	8	1405	30	17915	3.40024	0.00733546	0.999964	0.0282015	11.4156
GOTERM_BP_3	GO:1903707~negative regulation of hemopoiesis	21	1405	142	17915	1.88569	0.00748484	0.999971	0.0286906	11.6348
GOTERM_BP_3	GO:0030279~negative regulation of ossification	15	1405	87	17915	2.19843	0.00748846	0.999971	0.0286258	11.6401
GOTERM_BP_3	GO:0001775~cell activation	94	1405	926	17915	1.29437	0.00763737	0.999977	0.0291091	11.8581
GOTERM_BP_3	GO:0030308~negative regulation of cell growth	25	1405	181	17915	1.76117	0.00774572	0.99998	0.0294371	12.0164
GOTERM_BP_3	GO:0060900~embryonic camera-type eye formation	5	1405	11	17915	5.79586	0.00792141	0.999984	0.0300157	12.2725
GOTERM_BP_3	GO:0060456~positive regulation of digestive system process	6	1405	17	17915	4.50031	0.00817947	0.999989	0.0308984	12.6475
GOTERM_BP_3	GO:0042754~negative regulation of circadian rhythm	6	1405	17	17915	4.50031	0.00817947	0.999989	0.0308984	12.6475
GOTERM_BP_3	GO:0001967~suckling behavior	6	1405	17	17915	4.50031	0.00817947	0.999989	0.0308984	12.6475
GOTERM_BP_3	GO:0035176~social behavior	11	1405	54	17915	2.5974	0.00844361	0.999992	0.0317983	13.0297
GOTERM_BP_3	GO:0001662~behavioral fear response	10	1405	46	17915	2.77193	0.0084909	0.999993	0.0318883	13.098
GOTERM_BP_3	GO:0060323~head morphogenesis	10	1405	46	17915	2.77193	0.0084909	0.999993	0.0318883	13.098
GOTERM_BP_3	GO:0060669~embryonic placenta morphogenesis	8	1405	31	17915	3.29055	0.00884743	0.999996	0.0331217	13.611
GOTERM_BP_3	GO:0046483~heterocycle metabolic process	472	1405	5497	17915	1.09486	0.0089016	0.999996	0.033233	13.6887
GOTERM_BP_3	GO:0048521~negative regulation of behavior	7	1405	24	17915	3.71901	0.00903007	0.999997	0.0336168	13.8727
GOTERM_BP_3	GO:0032098~regulation of appetite	7	1405	24	17915	3.71901	0.00903007	0.999997	0.0336168	13.8727
GOTERM_BP_3	GO:0040014~regulation of multicellular organism growth	15	1405	89	17915	2.14903	0.00913771	0.999997	0.0339221	14.0266
GOTERM_BP_3	GO:0051129~negative regulation of cellular component organization	71	1405	675	17915	1.3412	0.00949829	0.999998	0.0351498	14.5402
GOTERM_BP_3	GO:0022407~regulation of cell-cell adhesion	44	1405	380	17915	1.47642	0.00951872	0.999998	0.0351314	14.5693
GOTERM_BP_3	GO:0003179~heart valve morphogenesis	9	1405	39	17915	2.94251	0.00960313	0.999999	0.0353455	14.689
GOTERM_BP_3	GO:0002683~negative regulation of immune system process	46	1405	404	17915	1.45183	0.0104066	1	0.0381605	15.8214
GOTERM_BP_3	GO:0061037~negative regulation of cartilage development	7	1405	25	17915	3.57025	0.0111099	1	0.0405942	16.801
GOTERM_BP_3	GO:0050802~circadian sleep/wake cycle, sleep	7	1405	25	17915	3.57025	0.0111099	1	0.0405942	16.801
GOTERM_BP_3	GO:0021544~subpallium development	7	1405	25	17915	3.57025	0.0111099	1	0.0405942	16.801
GOTERM_BP_3	GO:0051090~regulation of sequence-specific DNA binding transcription factor activity	40	1405	342	17915	1.49133	0.0115683	1	0.0421326	17.4336
GOTERM_BP_3	GO:0002088~lens development in camera-type eye	13	1405	74	17915	2.24002	0.0120108	1	0.0436046	18.04
GOTERM_BP_3	GO:1903706~regulation of hemopoiesis	43	1405	376	17915	1.45821	0.0126054	1	0.0456085	18.8483
GOTERM_BP_3	GO:0034330~cell junction organization	26	1405	199	17915	1.66595	0.01288	1	0.046465	19.2192
GOTERM_BP_3	GO:0019827~stem cell population maintenance	21	1405	150	17915	1.78512	0.013396	1	0.0481689	19.9115
GOTERM_BP_3	GO:0009886~post-embryonic morphogenesis	6	1405	19	17915	4.0266	0.0134837	1	0.0483544	20.0286
GOTERM_BP_3	GO:0021680~cerebellar Purkinje cell layer development	8	1405	34	17915	3.00021	0.0147465	1	0.0526599	21.6974
GOTERM_BP_3	GO:0044246~regulation of multicellular organismal metabolic process	9	1405	42	17915	2.73233	0.0149672	1	0.0532966	21.9857
GOTERM_BP_3	GO:1904748~regulation of apoptotic process involved in development	5	1405	13	17915	4.90419	0.015127	1	0.0537179	22.1938
GOTERM_BP_3	GO:0022409~positive regulation of cell-cell adhesion	27	1405	213	17915	1.61631	0.016048	1	0.0567761	23.3831
GOTERM_BP_3	GO:0060343~trabecula formation	7	1405	27	17915	3.30579	0.016242	1	0.0573034	23.6315
GOTERM_BP_3	GO:0060713~labyrinthine layer morphogenesis	7	1405	27	17915	3.30579	0.016242	1	0.0573034	23.6315
GOTERM_BP_3	GO:0010634~positive regulation of epithelial cell migration	16	1405	105	17915	1.94299	0.016736	1	0.05886	24.2603
GOTERM_BP_3	GO:0051590~positive regulation of neurotransmitter transport	6	1405	20	17915	3.82527	0.0168428	1	0.0590796	24.3957
GOTERM_BP_3	GO:1903523~negative regulation of blood circulation	9	1405	43	17915	2.66879	0.0171613	1	0.0600219	24.7979
GOTERM_BP_3	GO:0033627~cell adhesion mediated by integrin	9	1405	43	17915	2.66879	0.0171613	1	0.0600219	24.7979
GOTERM_BP_3	GO:0031069~hair follicle morphogenesis	8	1405	35	17915	2.91449	0.0172199	1	0.0600727	24.8718
GOTERM_BP_3	GO:0048871~multicellular organismal homeostasis	39	1405	340	17915	1.4626	0.0173111	1	0.060234	24.9864
GOTERM_BP_3	GO:0048635~negative regulation of muscle organ development	11	1405	60	17915	2.33766	0.0174077	1	0.060413	25.1078
GOTERM_BP_3	GO:0072034~renal vesicle induction	3	1405	3	17915	12.7509	0.0174527	1	0.0604162	25.1642
GOTERM_BP_3	GO:0007162~negative regulation of cell adhesion	29	1405	237	17915	1.56024	0.0191669	1	0.0660429	27.2849
GOTERM_BP_3	GO:0045992~negative regulation of embryonic development	7	1405	28	17915	3.18772	0.0193368	1	0.066451	27.492
GOTERM_BP_3	GO:1904746~negative regulation of apoptotic process involved in development	4	1405	8	17915	6.37544	0.019936	1	0.0682915	28.2181
GOTERM_BP_3	GO:0022600~digestive system process	15	1405	98	17915	1.95167	0.0203584	1	0.0695318	28.7257
GOTERM_BP_3	GO:0032233~positive regulation of actin filament bundle assembly	10	1405	53	17915	2.40583	0.0209307	1	0.0712622	29.4081
GOTERM_BP_3	GO:0010171~body morphogenesis	11	1405	62	17915	2.26225	0.0215661	1	0.0731898	30.1585
GOTERM_BP_3	GO:0001101~response to acid chemical	43	1405	390	17915	1.40587	0.0221124	1	0.0748123	30.7978
GOTERM_BP_3	GO:0003016~respiratory system process	7	1405	29	17915	3.0778	0.0228098	1	0.0769204	31.6059
GOTERM_BP_3	GO:0032350~regulation of hormone metabolic process	8	1405	37	17915	2.75695	0.0230163	1	0.0774112	31.8434
GOTERM_BP_3	GO:1903708~positive regulation of hemopoiesis	24	1405	189	17915	1.61916	0.0232439	1	0.0779687	32.1044
GOTERM_BP_3	GO:0061383~trabecula morphogenesis	10	1405	54	17915	2.36128	0.0234282	1	0.0783823	32.315
GOTERM_BP_3	GO:0010876~lipid localization	39	1405	348	17915	1.42898	0.0234798	1	0.078364	32.3739
GOTERM_BP_3	GO:0009266~response to temperature stimulus	21	1405	159	17915	1.68408	0.0239215	1	0.0796063	32.8757
GOTERM_BP_3	GO:0010811~positive regulation of cell-substrate adhesion	16	1405	110	17915	1.85467	0.0246045	1	0.0816185	33.6448
GOTERM_BP_3	GO:0034505~tooth mineralization	6	1405	22	17915	3.47752	0.0251211	1	0.0830845	34.2211
GOTERM_BP_3	GO:0045760~positive regulation of action potential	5	1405	15	17915	4.2503	0.0254735	1	0.0840169	34.6114
GOTERM_BP_3	GO:0051091~positive regulation of sequence-specific DNA binding transcription factor activity	26	1405	212	17915	1.56379	0.0262922	1	0.0864296	35.51
GOTERM_BP_3	GO:1905209~positive regulation of cardiocyte differentiation	7	1405	30	17915	2.97521	0.0266784	1	0.0874547	35.9298
GOTERM_BP_3	GO:0045787~positive regulation of cell cycle	35	1405	309	17915	1.44428	0.0280005	1	0.0914311	37.3477
GOTERM_BP_3	GO:0060592~mammary gland formation	4	1405	9	17915	5.66706	0.0281869	1	0.0918068	37.5452
GOTERM_BP_3	GO:0043647~inositol phosphate metabolic process	9	1405	47	17915	2.44166	0.0282619	1	0.0918313	37.6246
GOTERM_BP_3	GO:0050921~positive regulation of chemotaxis	18	1405	132	17915	1.73876	0.0289531	1	0.0937841	38.3509
GOTERM_BP_3	GO:0032410~negative regulation of transporter activity	10	1405	56	17915	2.27694	0.0290467	1	0.0938619	38.4488
GOTERM_BP_3	GO:0051953~negative regulation of amine transport	6	1405	23	17915	3.32632	0.030087	1	0.0968829	39.5256
GOTERM_BP_3	GO:0006970~response to osmotic stress	13	1405	84	17915	1.97335	0.0302851	1	0.0972766	39.7286
GOTERM_BP_3	GO:0002026~regulation of the force of heart contraction	7	1405	31	17915	2.87923	0.0309579	1	0.0991339	40.4133
GOTERM_BP_3	GO:0003188~heart valve formation	5	1405	16	17915	3.98465	0.0319094	1	0.101837	41.3693
GOTERM_BP_3	GO:0042756~drinking behavior	5	1405	16	17915	3.98465	0.0319094	1	0.101837	41.3693
GOTERM_BP_3	GO:0010035~response to inorganic substance	57	1405	558	17915	1.30251	0.0328765	1	0.10457	42.3262
GOTERM_BP_3	GO:0061205~paramesonephric duct development	3	1405	4	17915	9.56317	0.0330966	1	0.105007	42.5419
GOTERM_BP_3	GO:0060737~prostate gland morphogenetic growth	3	1405	4	17915	9.56317	0.0330966	1	0.105007	42.5419
GOTERM_BP_3	GO:0060214~endocardium formation	3	1405	4	17915	9.56317	0.0330966	1	0.105007	42.5419
GOTERM_BP_3	GO:0060325~face morphogenesis	8	1405	40	17915	2.55018	0.0340276	1	0.107604	43.446
GOTERM_BP_3	GO:0034103~regulation of tissue remodeling	12	1405	76	17915	2.0133	0.034082	1	0.107529	43.4984
GOTERM_BP_3	GO:0060706~cell differentiation involved in embryonic placenta development	7	1405	32	17915	2.78926	0.0356614	1	0.112059	45.0004
GOTERM_BP_3	GO:0010942~positive regulation of cell death	62	1405	620	17915	1.27509	0.0368432	1	0.11536	46.0996
GOTERM_BP_3	GO:0034763~negative regulation of transmembrane transport	12	1405	77	17915	1.98715	0.0370581	1	0.115749	46.2973
GOTERM_BP_3	GO:0008343~adult feeding behavior	4	1405	10	17915	5.10036	0.0379651	1	0.1182	47.124
GOTERM_BP_3	GO:0051971~positive regulation of transmission of nerve impulse	4	1405	10	17915	5.10036	0.0379651	1	0.1182	47.124
GOTERM_BP_3	GO:0098908~regulation of neuronal action potential	4	1405	10	17915	5.10036	0.0379651	1	0.1182	47.124
GOTERM_BP_3	GO:0051589~negative regulation of neurotransmitter transport	5	1405	17	17915	3.75026	0.0392109	1	0.121639	48.2401
GOTERM_BP_3	GO:0002696~positive regulation of leukocyte activation	33	1405	296	17915	1.42155	0.0395084	1	0.122254	48.5033
GOTERM_BP_3	GO:0033687~osteoblast proliferation	6	1405	25	17915	3.06021	0.041758	1	0.128608	50.4535
GOTERM_BP_3	GO:0002089~lens morphogenesis in camera-type eye	6	1405	25	17915	3.06021	0.041758	1	0.128608	50.4535
GOTERM_BP_3	GO:0010719~negative regulation of epithelial to mesenchymal transition	6	1405	25	17915	3.06021	0.041758	1	0.128608	50.4535
GOTERM_BP_3	GO:0042755~eating behavior	8	1405	42	17915	2.42874	0.0430388	1	0.132076	51.5326
GOTERM_BP_3	GO:0050790~regulation of catalytic activity	149	1405	1662	17915	1.14313	0.0466299	1	0.142215	54.4417
GOTERM_BP_3	GO:0001696~gastric acid secretion	5	1405	18	17915	3.54191	0.0473835	1	0.144084	55.031
GOTERM_BP_3	GO:0042698~ovulation cycle	17	1405	130	17915	1.66742	0.0476363	1	0.144504	55.2271
GOTERM_BP_3	GO:0080134~regulation of response to stress	110	1405	1191	17915	1.17766	0.0483186	1	0.146153	55.7522
GOTERM_BP_3	GO:0045924~regulation of female receptivity	4	1405	11	17915	4.63669	0.0492315	1	0.148449	56.4458
GOTERM_BP_3	GO:0008212~mineralocorticoid metabolic process	4	1405	11	17915	4.63669	0.0492315	1	0.148449	56.4458
GOTERM_BP_3	GO:0007586~digestion	17	1405	131	17915	1.6547	0.0504894	1	0.151711	57.3849
GOTERM_BP_3	GO:0032103~positive regulation of response to external stimulus	30	1405	270	17915	1.41677	0.0517846	1	0.155055	58.3319
GOTERM_BP_3	GO:0035502~metanephric part of ureteric bud development	3	1405	5	17915	7.65053	0.0523224	1	0.156246	58.7193
GOTERM_BP_3	GO:0060023~soft palate development	3	1405	5	17915	7.65053	0.0523224	1	0.156246	58.7193
GOTERM_BP_3	GO:0032847~regulation of cellular pH reduction	3	1405	5	17915	7.65053	0.0523224	1	0.156246	58.7193
GOTERM_BP_3	GO:0060157~urinary bladder development	3	1405	5	17915	7.65053	0.0523224	1	0.156246	58.7193
GOTERM_BP_3	GO:0097529~myeloid leukocyte migration	20	1405	163	17915	1.56453	0.0528386	1	0.157371	59.088
GOTERM_BP_3	GO:0031623~receptor internalization	12	1405	82	17915	1.86598	0.0546738	1	0.162173	60.3737
GOTERM_BP_3	GO:0051149~positive regulation of muscle cell differentiation	14	1405	102	17915	1.75012	0.0552369	1	0.163405	60.7605
GOTERM_BP_3	GO:0044253~positive regulation of multicellular organismal metabolic process	6	1405	27	17915	2.83353	0.0558123	1	0.164665	61.1521
GOTERM_BP_3	GO:0030595~leukocyte chemotaxis	23	1405	196	17915	1.49628	0.0559013	1	0.164573	61.2124
GOTERM_BP_3	GO:0060746~parental behavior	5	1405	19	17915	3.3555	0.0564235	1	0.165677	61.564
GOTERM_BP_3	GO:0070489~T cell aggregation	47	1405	464	17915	1.29158	0.0583708	1	0.170688	62.8493
GOTERM_BP_3	GO:0050817~coagulation	23	1405	197	17915	1.48868	0.0584795	1	0.170639	62.9199
GOTERM_BP_3	GO:0060674~placenta blood vessel development	7	1405	36	17915	2.47934	0.0589059	1	0.171457	63.1954
GOTERM_BP_3	GO:1901343~negative regulation of vasculature development	13	1405	93	17915	1.78238	0.0590696	1	0.171556	63.3007
GOTERM_BP_3	GO:0060430~lung saccule development	4	1405	12	17915	4.2503	0.061924	1	0.17894	65.0912
GOTERM_BP_3	GO:0042482~positive regulation of odontogenesis	4	1405	12	17915	4.2503	0.061924	1	0.17894	65.0912
GOTERM_BP_3	GO:0030850~prostate gland development	9	1405	55	17915	2.08651	0.0634347	1	0.182646	66.0053
GOTERM_BP_3	GO:0044260~cellular macromolecule metabolic process	659	1405	8038	17915	1.04539	0.0634636	1	0.182359	66.0226
GOTERM_BP_3	GO:0060008~Sertoli cell differentiation	6	1405	28	17915	2.73233	0.0637417	1	0.182741	66.1884
GOTERM_BP_3	GO:0001919~regulation of receptor recycling	6	1405	28	17915	2.73233	0.0637417	1	0.182741	66.1884
GOTERM_BP_3	GO:0050867~positive regulation of cell activation	33	1405	309	17915	1.36175	0.0642065	1	0.183618	66.4636
GOTERM_BP_3	GO:0009268~response to pH	8	1405	46	17915	2.21755	0.065335	1	0.186256	67.1233
GOTERM_BP_3	GO:0060341~regulation of cellular localization	81	1405	864	17915	1.1954	0.0661603	1	0.188075	67.598
GOTERM_BP_3	GO:0007635~chemosensory behavior	5	1405	20	17915	3.18772	0.0663186	1	0.188124	67.6883
GOTERM_BP_3	GO:0061323~cell proliferation involved in heart morphogenesis	5	1405	20	17915	3.18772	0.0663186	1	0.188124	67.6883
GOTERM_BP_3	GO:0045807~positive regulation of endocytosis	17	1405	136	17915	1.59386	0.0665508	1	0.188367	67.8203
GOTERM_BP_3	GO:0032846~positive regulation of homeostatic process	25	1405	222	17915	1.43591	0.0674493	1	0.19036	68.3265
GOTERM_BP_3	GO:0034754~cellular hormone metabolic process	12	1405	85	17915	1.80013	0.067552	1	0.190258	68.3839
GOTERM_BP_3	GO:0050865~regulation of cell activation	51	1405	516	17915	1.26026	0.0688229	1	0.193208	69.0859
GOTERM_BP_3	GO:0050866~negative regulation of cell activation	20	1405	169	17915	1.50898	0.0706952	1	0.1977	70.0935
GOTERM_BP_3	GO:0003157~endocardium development	4	1405	13	17915	3.92335	0.0759631	1	0.210882	72.7655
GOTERM_BP_3	GO:0070255~regulation of mucus secretion	4	1405	13	17915	3.92335	0.0759631	1	0.210882	72.7655
GOTERM_BP_3	GO:0060670~branching involved in labyrinthine layer morphogenesis	4	1405	13	17915	3.92335	0.0759631	1	0.210882	72.7655
GOTERM_BP_3	GO:1905208~negative regulation of cardiocyte differentiation	4	1405	13	17915	3.92335	0.0759631	1	0.210882	72.7655
GOTERM_BP_3	GO:0042403~thyroid hormone metabolic process	5	1405	21	17915	3.03593	0.0770492	1	0.213253	73.2878
GOTERM_BP_3	GO:0060009~Sertoli cell development	5	1405	21	17915	3.03593	0.0770492	1	0.213253	73.2878
GOTERM_BP_3	GO:0097186~amelogenesis	5	1405	21	17915	3.03593	0.0770492	1	0.213253	73.2878
GOTERM_BP_3	GO:0002685~regulation of leukocyte migration	20	1405	172	17915	1.48266	0.0809967	1	0.222855	75.1078
GOTERM_BP_3	GO:0044092~negative regulation of molecular function	85	1405	922	17915	1.17552	0.0810624	1	0.2226	75.1371
GOTERM_BP_3	GO:0051781~positive regulation of cell division	11	1405	78	17915	1.7982	0.0828783	1	0.226742	75.9337
GOTERM_BP_3	GO:0044802~single-organism membrane organization	68	1405	724	17915	1.1976	0.0858578	1	0.233748	77.1891
GOTERM_BP_3	GO:0019098~reproductive behavior	8	1405	49	17915	2.08178	0.085901	1	0.233422	77.2069
GOTERM_BP_3	GO:0050818~regulation of coagulation	12	1405	89	17915	1.71922	0.0875414	1	0.237047	77.8711
GOTERM_BP_3	GO:0010633~negative regulation of epithelial cell migration	9	1405	59	17915	1.94505	0.0882015	1	0.238236	78.1331
GOTERM_BP_3	GO:0043502~regulation of muscle adaptation	11	1405	79	17915	1.77544	0.0885786	1	0.238724	78.2816
GOTERM_BP_3	GO:0072111~cell proliferation involved in kidney development	5	1405	22	17915	2.89793	0.0885888	1	0.238311	78.2856
GOTERM_BP_3	GO:0060438~trachea development	5	1405	22	17915	2.89793	0.0885888	1	0.238311	78.2856
GOTERM_BP_3	GO:0007565~female pregnancy	23	1405	207	17915	1.41677	0.0889433	1	0.238742	78.4242
GOTERM_BP_3	GO:0032094~response to food	7	1405	40	17915	2.23141	0.0894243	1	0.23948	78.611
GOTERM_BP_3	GO:0002686~negative regulation of leukocyte migration	6	1405	31	17915	2.46791	0.0910854	1	0.243084	79.2444
GOTERM_BP_3	GO:0035641~locomotory exploration behavior	4	1405	14	17915	3.64311	0.0912563	1	0.243058	79.3085
GOTERM_BP_3	GO:0007530~sex determination	8	1405	50	17915	2.04014	0.0934878	1	0.248006	80.1293
GOTERM_BP_3	GO:0071496~cellular response to external stimulus	29	1405	276	17915	1.33977	0.0958148	1	0.253143	80.9527
GOTERM_BP_3	GO:0046649~lymphocyte activation	64	1405	683	17915	1.19481	0.0971594	1	0.255899	81.4137
GOTERM_BP_3	GO:0060996~dendritic spine development	12	1405	91	17915	1.68144	0.0987603	1	0.259246	81.9489
GOTERM_BP_3	GO:0061072~iris morphogenesis	3	1405	7	17915	5.46467	0.0989737	1	0.259291	82.0191
GOTERM_BP_3	GO:0051970~negative regulation of transmission of nerve impulse	3	1405	7	17915	5.46467	0.0989737	1	0.259291	82.0191

## Sheet: H3K27me3_only
Supplemental Table 5. Results from Gene Ontology (GO) analysis
Category	Term	Count	List Total	Pop Hits	Pop Total	Fold Enrichment	P-Value	Bonferroni	Benjamini	%FDR
GOTERM_BP_3	GO:0048731~system development	209	499	4610	17915	1.62765	1.95947e-15	2.01839e-12	2.01839e-12	3.16414e-12
GOTERM_BP_3	GO:0048513~animal organ development	171	499	3520	17915	1.74409	9.388e-15	9.53126e-12	4.76563e-12	1.49325e-11
GOTERM_BP_3	GO:0007275~multicellular organism development	225	499	5195	17915	1.55494	1.26883e-14	1.27831e-11	4.26104e-12	2.00173e-11
GOTERM_BP_3	GO:0009653~anatomical structure morphogenesis	127	499	2744	17915	1.66164	3.18532e-09	3.21717e-06	8.04293e-07	5.0391e-06
GOTERM_BP_3	GO:0051049~regulation of transport	94	499	1828	17915	1.84615	5.2545e-09	5.30703e-06	1.06141e-06	8.31248e-06
GOTERM_BP_3	GO:0048869~cellular developmental process	181	499	4465	17915	1.45537	1.07643e-08	1.08719e-05	1.81199e-06	1.70288e-05
GOTERM_BP_3	GO:0009888~tissue development	95	499	1889	17915	1.80554	1.27959e-08	1.29238e-05	1.84627e-06	2.02428e-05
GOTERM_BP_3	GO:0009887~organ morphogenesis	61	499	1038	17915	2.10984	5.71947e-08	5.7765e-05	7.22081e-06	9.04806e-05
GOTERM_BP_3	GO:0061061~muscle structure development	44	499	645	17915	2.44912	1.12623e-07	0.000113743	1.26388e-05	0.000178167
GOTERM_BP_3	GO:0042127~regulation of cell proliferation	82	499	1642	17915	1.7929	2.3088e-07	0.000233161	2.33186e-05	0.000365245
GOTERM_BP_3	GO:0044765~single-organism transport	132	499	3128	17915	1.51504	3.73207e-07	0.000376868	3.42666e-05	0.000590402
GOTERM_BP_3	GO:0034762~regulation of transmembrane transport	31	499	403	17915	2.76168	1.05258e-06	0.00106254	8.85882e-05	0.00166514
GOTERM_BP_3	GO:0055085~transmembrane transport	56	499	1001	17915	2.00849	1.06097e-06	0.00107101	8.24261e-05	0.00167842
GOTERM_BP_3	GO:0042592~homeostatic process	82	499	1707	17915	1.72463	1.11597e-06	0.0011265	8.05063e-05	0.00176543
GOTERM_BP_3	GO:0048468~cell development	101	499	2278	17915	1.59178	1.78153e-06	0.00179773	0.00011995	0.00281831
GOTERM_BP_3	GO:0044057~regulation of system process	35	499	504	17915	2.49318	1.91886e-06	0.00193617	0.000121121	0.00303554
GOTERM_BP_3	GO:0048568~embryonic organ development	34	499	494	17915	2.47097	3.36148e-06	0.00338935	0.000199692	0.00531765
GOTERM_BP_3	GO:0003012~muscle system process	28	499	365	17915	2.75411	4.15127e-06	0.00418402	0.000232906	0.00656701
GOTERM_BP_3	GO:0002684~positive regulation of immune system process	45	499	782	17915	2.06596	7.47159e-06	0.00751793	0.000397097	0.0118192
GOTERM_BP_3	GO:0051240~positive regulation of multicellular organismal process	75	499	1596	17915	1.68711	7.9488e-06	0.00799618	0.000401336	0.0125741
GOTERM_BP_3	GO:0048646~anatomical structure formation involved in morphogenesis	62	499	1263	17915	1.7624	1.6609e-05	0.0166353	0.000798499	0.0262717
GOTERM_BP_3	GO:0007423~sensory organ development	37	499	608	17915	2.18481	1.77647e-05	0.0177825	0.000815235	0.0280996
GOTERM_BP_3	GO:0008284~positive regulation of cell proliferation	50	499	943	17915	1.9036	1.92141e-05	0.0192193	0.0008434	0.0303918
GOTERM_BP_3	GO:0043270~positive regulation of ion transport	21	499	250	17915	3.01575	2.40107e-05	0.0239594	0.00100995	0.0379775
GOTERM_BP_3	GO:0002685~regulation of leukocyte migration	17	499	172	17915	3.54843	2.53868e-05	0.025315	0.00102511	0.0401537
GOTERM_BP_3	GO:0009617~response to bacterium	39	499	672	17915	2.08359	2.86011e-05	0.0284743	0.00111044	0.0452366
GOTERM_BP_3	GO:0048598~embryonic morphogenesis	37	499	648	17915	2.04995	6.7749e-05	0.06614	0.00253119	0.107123
GOTERM_BP_3	GO:0009891~positive regulation of biosynthetic process	75	499	1744	17915	1.54394	0.000147462	0.138386	0.00530543	0.233026
GOTERM_BP_3	GO:0006928~movement of cell or subcellular component	74	499	1724	17915	1.54103	0.000175871	0.162761	0.00610699	0.277862
GOTERM_BP_3	GO:2000021~regulation of ion homeostasis	17	499	203	17915	3.00655	0.000182332	0.168207	0.00612025	0.288054
GOTERM_BP_3	GO:0007267~cell-cell signaling	59	499	1294	17915	1.63694	0.000210818	0.191802	0.00684576	0.332988
GOTERM_BP_3	GO:0043062~extracellular structure organization	18	499	229	17915	2.82198	0.000237197	0.213056	0.00745947	0.374582
GOTERM_BP_3	GO:0048523~negative regulation of cellular process	158	499	4417	17915	1.28424	0.000260206	0.231137	0.00793329	0.410847
GOTERM_BP_3	GO:0002687~positive regulation of leukocyte migration	13	499	130	17915	3.59018	0.000275725	0.243097	0.00815832	0.4353
GOTERM_BP_3	GO:0001525~angiogenesis	27	499	444	17915	2.18322	0.000307778	0.267215	0.00884361	0.485788
GOTERM_BP_3	GO:0009893~positive regulation of metabolic process	114	499	3004	17915	1.36245	0.000331478	0.284553	0.0092582	0.523103
GOTERM_BP_3	GO:0048870~cell motility	60	499	1348	17915	1.598	0.000339638	0.290428	0.00922992	0.535949
GOTERM_BP_3	GO:0003013~circulatory system process	27	499	450	17915	2.15411	0.000379351	0.318335	0.010034	0.59844
GOTERM_BP_3	GO:0051241~negative regulation of multicellular organismal process	53	499	1157	17915	1.64459	0.000413708	0.341593	0.010659	0.652473
GOTERM_BP_3	GO:0031325~positive regulation of cellular metabolic process	106	499	2769	17915	1.37436	0.000438412	0.357825	0.0110113	0.691309
GOTERM_BP_3	GO:0032845~negative regulation of homeostatic process	16	499	199	17915	2.88658	0.000463611	0.373969	0.0113583	0.730906
GOTERM_BP_3	GO:0051094~positive regulation of developmental process	56	499	1252	17915	1.60583	0.000505599	0.399975	0.0120879	0.796855
GOTERM_BP_3	GO:0001568~blood vessel development	34	499	641	17915	1.90431	0.000524524	0.411341	0.0122478	0.826567
GOTERM_BP_3	GO:0048871~multicellular organismal homeostasis	22	499	340	17915	2.32306	0.000574744	0.44047	0.0131101	0.905368
GOTERM_BP_3	GO:0048514~blood vessel morphogenesis	30	499	540	17915	1.99454	0.000599435	0.454259	0.0133679	0.94409
GOTERM_BP_3	GO:0048729~tissue morphogenesis	34	499	647	17915	1.88665	0.000608518	0.459246	0.0132761	0.958332
GOTERM_BP_3	GO:0050776~regulation of immune response	33	499	620	17915	1.9109	0.000615459	0.463026	0.0131428	0.969213
GOTERM_BP_3	GO:0008285~negative regulation of cell proliferation	34	499	649	17915	1.88083	0.000651526	0.482247	0.0136201	1.02574
GOTERM_BP_3	GO:0048522~positive regulation of cellular process	167	499	4808	17915	1.24701	0.000680367	0.497121	0.0139307	1.07091
GOTERM_BP_3	GO:0045597~positive regulation of cell differentiation	46	499	981	17915	1.68347	0.000697378	0.505693	0.0139931	1.09755
GOTERM_BP_3	GO:2000026~regulation of multicellular organismal development	76	499	1888	17915	1.4452	0.000934438	0.611019	0.0183439	1.46807
GOTERM_BP_3	GO:0016477~cell migration	53	499	1199	17915	1.58699	0.000947036	0.615941	0.0182348	1.48772
GOTERM_BP_3	GO:0051173~positive regulation of nitrogen compound metabolic process	71	499	1742	17915	1.46328	0.00104461	0.652019	0.0197201	1.63981
GOTERM_BP_3	GO:0010817~regulation of hormone levels	28	499	509	17915	1.97495	0.00108052	0.664427	0.0200176	1.69574
GOTERM_BP_3	GO:0010033~response to organic substance	110	499	2972	17915	1.3288	0.00109181	0.668236	0.0198607	1.71332
GOTERM_BP_3	GO:0006935~chemotaxis	29	499	536	17915	1.94245	0.00109623	0.669716	0.0195878	1.7202
GOTERM_BP_3	GO:0051050~positive regulation of transport	46	499	1005	17915	1.64327	0.00110628	0.673055	0.0194223	1.73584
GOTERM_BP_3	GO:0042330~taxis	29	499	538	17915	1.93523	0.00116715	0.692571	0.020131	1.83052
GOTERM_BP_3	GO:0019725~cellular homeostasis	41	499	866	17915	1.69974	0.00117272	0.694297	0.0198867	1.83918
GOTERM_BP_3	GO:1903530~regulation of secretion by cell	35	499	699	17915	1.79766	0.0011739	0.694662	0.0195781	1.84102
GOTERM_BP_3	GO:0042391~regulation of membrane potential	23	499	385	17915	2.14478	0.00119735	0.701817	0.0196414	1.87746
GOTERM_BP_3	GO:0032844~regulation of homeostatic process	27	499	490	17915	1.97826	0.00131617	0.735578	0.0212264	2.06196
GOTERM_BP_3	GO:0051270~regulation of cellular component movement	40	499	846	17915	1.69748	0.00141917	0.761736	0.0225107	2.22163
GOTERM_BP_3	GO:0070887~cellular response to chemical stimulus	98	499	2607	17915	1.34959	0.00143035	0.764416	0.0223357	2.23895
GOTERM_BP_3	GO:0051283~negative regulation of sequestering of calcium ion	10	499	97	17915	3.70122	0.00151112	0.782898	0.0232243	2.36398
GOTERM_BP_3	GO:0021546~rhombomere development	4	499	9	17915	15.9564	0.00158264	0.79805	0.023947	2.47455
GOTERM_BP_3	GO:0045595~regulation of cell differentiation	72	499	1802	17915	1.43448	0.00163209	0.807903	0.0243225	2.55093
GOTERM_BP_3	GO:0043207~response to external biotic stimulus	46	499	1028	17915	1.6065	0.0017355	0.826985	0.0254697	2.71049
GOTERM_BP_3	GO:0050778~positive regulation of immune response	26	499	474	17915	1.9693	0.00175777	0.830839	0.0254235	2.74481
GOTERM_BP_3	GO:0051051~negative regulation of transport	27	499	510	17915	1.90068	0.00228028	0.900312	0.0324021	3.54702
GOTERM_BP_3	GO:0032409~regulation of transporter activity	15	499	210	17915	2.56441	0.00228157	0.900443	0.031971	3.549
GOTERM_BP_3	GO:2000147~positive regulation of cell motility	25	499	461	17915	1.94695	0.00255212	0.924297	0.0352114	3.96192
GOTERM_BP_3	GO:0051048~negative regulation of secretion	16	499	239	17915	2.40347	0.00289446	0.946477	0.0393112	4.48206
GOTERM_BP_3	GO:0030029~actin filament-based process	32	499	656	17915	1.75131	0.00297062	0.950451	0.0397919	4.5974
GOTERM_BP_3	GO:0048534~hematopoietic or lymphoid organ development	42	499	940	17915	1.60412	0.00298375	0.951106	0.0394423	4.61728
GOTERM_BP_3	GO:0006810~transport	148	499	4325	17915	1.22855	0.00309196	0.956182	0.0403189	4.78092
GOTERM_BP_3	GO:0051272~positive regulation of cellular component movement	25	499	472	17915	1.90158	0.00347119	0.970163	0.0445859	5.35233
GOTERM_BP_3	GO:0040017~positive regulation of locomotion	25	499	474	17915	1.89356	0.0036251	0.974473	0.0459371	5.58332
GOTERM_BP_3	GO:0051282~regulation of sequestering of calcium ion	10	499	111	17915	3.2344	0.00380376	0.978702	0.0475552	5.85079
GOTERM_BP_3	GO:0001819~positive regulation of cytokine production	21	499	371	17915	2.03218	0.00380513	0.978731	0.0469915	5.85283
GOTERM_BP_3	GO:2000145~regulation of cell motility	36	499	782	17915	1.65277	0.00388597	0.980405	0.0473894	5.97362
GOTERM_BP_3	GO:0010604~positive regulation of macromolecule metabolic process	101	499	2794	17915	1.29781	0.00391124	0.980901	0.047123	6.01134
GOTERM_BP_3	GO:0032098~regulation of appetite	5	499	24	17915	7.47954	0.0040294	0.983057	0.0479441	6.18758
GOTERM_BP_3	GO:0001816~cytokine production	30	499	616	17915	1.74846	0.00417352	0.985361	0.0490432	6.4021
GOTERM_BP_3	GO:0001817~regulation of cytokine production	28	499	564	17915	1.78236	0.00452127	0.989713	0.0524212	6.91783
GOTERM_BP_3	GO:0006952~defense response	59	499	1481	17915	1.43025	0.00495482	0.993374	0.056666	7.55708
GOTERM_BP_3	GO:0034764~positive regulation of transmembrane transport	11	499	138	17915	2.86174	0.00523513	0.995015	0.0591159	7.9682
GOTERM_BP_3	GO:0009612~response to mechanical stimulus	15	499	232	17915	2.32124	0.00554388	0.996357	0.0618127	8.41904
GOTERM_BP_3	GO:0048584~positive regulation of response to stimulus	70	499	1834	17915	1.3703	0.00575609	0.997063	0.0634109	8.72771
GOTERM_BP_3	GO:0009582~detection of abiotic stimulus	10	499	119	17915	3.01696	0.00600052	0.997709	0.0653115	9.08204
GOTERM_BP_3	GO:0009581~detection of external stimulus	10	499	120	17915	2.99182	0.00633232	0.998365	0.0680772	9.56097
GOTERM_BP_3	GO:0007154~cell communication	201	499	6231	17915	1.15812	0.00643636	0.998529	0.0684342	9.71066
GOTERM_BP_3	GO:0070661~leukocyte proliferation	18	499	314	17915	2.05807	0.00701979	0.999187	0.073652	10.5458
GOTERM_BP_3	GO:0048565~digestive tract development	11	499	145	17915	2.72359	0.00736151	0.999426	0.07632	11.0315
GOTERM_BP_3	GO:0046883~regulation of hormone secretion	17	499	290	17915	2.10459	0.00736251	0.999426	0.0755578	11.0329
GOTERM_BP_3	GO:0071216~cellular response to biotic stimulus	16	499	265	17915	2.16766	0.00743312	0.999466	0.075493	11.133
GOTERM_BP_3	GO:0032940~secretion by cell	40	499	935	17915	1.53591	0.00765657	0.999575	0.0769111	11.449
GOTERM_BP_3	GO:0060322~head development	35	499	791	17915	1.58858	0.00800997	0.999703	0.0795422	11.9465
GOTERM_BP_3	GO:0051238~sequestering of metal ion	10	499	126	17915	2.84935	0.00862881	0.999842	0.0846175	12.8115
GOTERM_BP_3	GO:1901615~organic hydroxy compound metabolic process	20	499	375	17915	1.91476	0.00895065	0.999886	0.0868075	13.2582
GOTERM_BP_3	GO:0030902~hindbrain development	12	499	173	17915	2.4903	0.00915012	0.999907	0.0878241	13.534
GOTERM_BP_3	GO:0050673~epithelial cell proliferation	20	499	377	17915	1.9046	0.00948958	0.999934	0.0900941	14.0014
GOTERM_BP_3	GO:1904018~positive regulation of vasculature development	11	499	152	17915	2.59816	0.010101	0.999965	0.0947572	14.8374
GOTERM_BP_3	GO:0071804~cellular potassium ion transport	11	499	152	17915	2.59816	0.010101	0.999965	0.0947572	14.8374
GOTERM_BP_3	GO:0007420~brain development	33	499	745	17915	1.59028	0.0102213	0.999969	0.0949592	15.001
GOTERM_BP_3	GO:0014888~striated muscle adaptation	6	499	48	17915	4.48773	0.0104218	0.999975	0.0958625	15.273
GOTERM_BP_3	GO:0002027~regulation of heart rate	8	499	89	17915	3.22713	0.0119547	0.999995	0.108272	17.3256
GOTERM_BP_3	GO:0051302~regulation of cell division	10	499	134	17915	2.67924	0.0126114	0.999997	0.112901	18.1906
GOTERM_BP_3	GO:0048771~tissue remodeling	12	499	182	17915	2.36715	0.0130423	0.999998	0.115534	18.7535
GOTERM_BP_3	GO:0050879~multicellular organismal movement	6	499	51	17915	4.22374	0.0133647	0.999999	0.117215	19.1724
GOTERM_BP_3	GO:0035295~tube development	31	499	702	17915	1.58541	0.0133676	0.999999	0.116238	19.1762
GOTERM_BP_3	GO:0009725~response to hormone	35	499	822	17915	1.52867	0.0138234	0.999999	0.118965	19.7649
GOTERM_BP_3	GO:0071495~cellular response to endogenous stimulus	47	499	1189	17915	1.41916	0.0141509	0.999999	0.120606	20.1853
GOTERM_BP_3	GO:0002697~regulation of immune effector process	21	499	421	17915	1.79083	0.0144242	1	0.121784	20.5346
GOTERM_BP_3	GO:0098609~cell-cell adhesion	44	499	1101	17915	1.43477	0.0148675	1	0.124281	21.0982
GOTERM_BP_3	GO:0032101~regulation of response to external stimulus	33	499	769	17915	1.54065	0.0153757	1	0.127234	21.7397
GOTERM_BP_3	GO:0010524~positive regulation of calcium ion transport into cytosol	6	499	53	17915	4.06436	0.0156103	1	0.12802	22.0341
GOTERM_BP_3	GO:0048839~inner ear development	13	499	212	17915	2.20153	0.0156543	1	0.127336	22.0893
GOTERM_BP_3	GO:0070482~response to oxygen levels	19	499	371	17915	1.83864	0.016115	1	0.129822	22.6641
GOTERM_BP_3	GO:1903531~negative regulation of secretion by cell	13	499	213	17915	2.19119	0.0161906	1	0.129372	22.758
GOTERM_BP_3	GO:1901700~response to oxygen-containing compound	62	499	1670	17915	1.33288	0.0163502	1	0.129556	22.9561
GOTERM_BP_3	GO:0035637~multicellular organismal signaling	9	499	117	17915	2.76168	0.0164575	1	0.12935	23.0888
GOTERM_BP_3	GO:0055086~nucleobase-containing small molecule metabolic process	29	499	657	17915	1.58471	0.0170582	1	0.132758	23.8286
GOTERM_BP_3	GO:0002367~cytokine production involved in immune response	7	499	75	17915	3.35084	0.0179367	1	0.138105	24.8985
GOTERM_BP_3	GO:0021675~nerve development	7	499	75	17915	3.35084	0.0179367	1	0.138105	24.8985
GOTERM_BP_3	GO:0030858~positive regulation of epithelial cell differentiation	6	499	55	17915	3.91656	0.0180943	1	0.138199	25.089
GOTERM_BP_3	GO:0051128~regulation of cellular component organization	84	499	2399	17915	1.25709	0.0192422	1	0.14529	26.4625
GOTERM_BP_3	GO:0032103~positive regulation of response to external stimulus	15	499	270	17915	1.99454	0.0192699	1	0.144417	26.4952
GOTERM_BP_3	GO:0035814~negative regulation of renal sodium excretion	3	499	8	17915	13.4632	0.0193227	1	0.143733	26.5579
GOTERM_BP_3	GO:0007611~learning or memory	15	499	271	17915	1.98718	0.0196866	1	0.145201	26.9878
GOTERM_BP_3	GO:0030595~leukocyte chemotaxis	12	499	196	17915	2.19807	0.0213032	1	0.155149	28.8694
GOTERM_BP_3	GO:0051781~positive regulation of cell division	7	499	78	17915	3.22196	0.02136	1	0.154434	28.9347
GOTERM_BP_3	GO:0045087~innate immune response	28	499	643	17915	1.56338	0.0222624	1	0.159351	29.9643
GOTERM_BP_3	GO:0048144~fibroblast proliferation	8	499	101	17915	2.84371	0.0225448	1	0.160103	30.2837
GOTERM_BP_3	GO:0010035~response to inorganic substance	25	499	558	17915	1.6085	0.023416	1	0.164676	31.2602
GOTERM_BP_3	GO:0006949~syncytium formation	6	499	59	17915	3.65103	0.0238135	1	0.166117	31.7015
GOTERM_BP_3	GO:0045494~photoreceptor cell maintenance	5	499	40	17915	4.48773	0.0244833	1	0.16927	32.439
GOTERM_BP_3	GO:0007389~pattern specification process	22	499	474	17915	1.66633	0.0247288	1	0.169691	32.7076
GOTERM_BP_3	GO:0002443~leukocyte mediated immunity	17	499	334	17915	1.82734	0.0248771	1	0.169494	32.8692
GOTERM_BP_3	GO:0043271~negative regulation of ion transport	9	499	127	17915	2.54422	0.0255383	1	0.172494	33.5857
GOTERM_BP_3	GO:0010647~positive regulation of cell communication	55	499	1490	17915	1.32523	0.0269866	1	0.180273	35.1302
GOTERM_BP_3	GO:0023056~positive regulation of signaling	55	499	1497	17915	1.31904	0.028101	1	0.185867	36.2956
GOTERM_BP_3	GO:0042755~eating behavior	5	499	42	17915	4.27402	0.0287236	1	0.188413	36.9381
GOTERM_BP_3	GO:0007165~signal transduction	181	499	5763	17915	1.12758	0.0310824	1	0.201154	39.3178
GOTERM_BP_3	GO:0022603~regulation of anatomical structure morphogenesis	40	499	1033	17915	1.3902	0.0322536	1	0.206705	40.4678
GOTERM_BP_3	GO:0051130~positive regulation of cellular component organization	47	499	1253	17915	1.34668	0.0324335	1	0.206463	40.6426
GOTERM_BP_3	GO:0002699~positive regulation of immune effector process	11	499	184	17915	2.1463	0.0332686	1	0.209963	41.4479
GOTERM_BP_3	GO:1903706~regulation of hemopoiesis	18	499	376	17915	1.7187	0.034424	1	0.215206	42.5453
GOTERM_BP_3	GO:0008217~regulation of blood pressure	11	499	186	17915	2.12322	0.0354275	1	0.219507	43.4827
GOTERM_BP_3	GO:0022409~positive regulation of cell-cell adhesion	12	499	213	17915	2.02264	0.0360472	1	0.22162	44.0543
GOTERM_BP_3	GO:0009967~positive regulation of signal transduction	49	499	1328	17915	1.32469	0.0364301	1	0.222408	44.4049
GOTERM_BP_3	GO:0022407~regulation of cell-cell adhesion	18	499	380	17915	1.70061	0.0375159	1	0.226993	45.3877
GOTERM_BP_3	GO:0098542~defense response to other organism	26	499	616	17915	1.51534	0.038436	1	0.230611	46.2078
GOTERM_BP_3	GO:0001662~behavioral fear response	5	499	46	17915	3.90237	0.0384364	1	0.229286	46.2081
GOTERM_BP_3	GO:0051235~maintenance of location	15	499	297	17915	1.81322	0.0384845	1	0.228227	46.2507
GOTERM_BP_3	GO:1903708~positive regulation of hemopoiesis	11	499	189	17915	2.08952	0.0388459	1	0.228832	46.5695
GOTERM_BP_3	GO:0045103~intermediate filament-based process	5	499	47	17915	3.81934	0.0411236	1	0.239388	48.5377
GOTERM_BP_3	GO:0060430~lung saccule development	3	499	12	17915	8.97545	0.0423311	1	0.244244	49.5534
GOTERM_BP_3	GO:0033002~muscle cell proliferation	11	499	192	17915	2.05687	0.0424853	1	0.243678	49.6817
GOTERM_BP_3	GO:0010522~regulation of calcium ion transport into cytosol	7	499	92	17915	2.73166	0.0431085	1	0.245487	50.1973
GOTERM_BP_3	GO:0010720~positive regulation of cell development	25	499	595	17915	1.50848	0.0445088	1	0.251148	51.3379
GOTERM_BP_3	GO:0090066~regulation of anatomical structure size	23	499	536	17915	1.54056	0.0447098	1	0.250789	51.4995
GOTERM_BP_3	GO:0042493~response to drug	20	499	447	17915	1.60634	0.0448228	1	0.250001	51.5903
GOTERM_BP_3	GO:0050804~modulation of synaptic transmission	16	499	332	17915	1.73021	0.0449825	1	0.249451	51.7181
GOTERM_BP_3	GO:0032989~cellular component morphogenesis	50	499	1382	17915	1.29891	0.0470173	1	0.258	53.32
GOTERM_BP_3	GO:0051341~regulation of oxidoreductase activity	6	499	71	17915	3.03396	0.0474526	1	0.258737	53.6562
GOTERM_BP_3	GO:0072044~collecting duct development	3	499	13	17915	8.28503	0.0491259	1	0.26534	54.9275
GOTERM_BP_3	GO:0045785~positive regulation of cell adhesion	17	499	366	17915	1.66757	0.0506514	1	0.27113	56.058
GOTERM_BP_3	GO:0007507~heart development	25	499	603	17915	1.48847	0.050693	1	0.269941	56.0884
GOTERM_BP_3	GO:0050920~regulation of chemotaxis	11	499	199	17915	1.98452	0.0516084	1	0.272803	56.7535
GOTERM_BP_3	GO:0002686~negative regulation of leukocyte migration	4	499	31	17915	4.63249	0.0540117	1	0.282395	58.455
GOTERM_BP_3	GO:0002026~regulation of the force of heart contraction	4	499	31	17915	4.63249	0.0540117	1	0.282395	58.455
GOTERM_BP_3	GO:0048520~positive regulation of behavior	4	499	31	17915	4.63249	0.0540117	1	0.282395	58.455
GOTERM_BP_3	GO:0043503~skeletal muscle fiber adaptation	2	499	2	17915	35.9018	0.0548247	1	0.284656	59.0162
GOTERM_BP_3	GO:0048732~gland development	21	499	488	17915	1.54495	0.0551224	1	0.284586	59.22
GOTERM_BP_3	GO:0048636~positive regulation of muscle organ development	6	499	75	17915	2.87214	0.0575978	1	0.294149	60.8777
GOTERM_BP_3	GO:0019637~organophosphate metabolic process	36	499	957	17915	1.35054	0.0596625	1	0.301725	62.2119
GOTERM_BP_3	GO:0016337~single organismal cell-cell adhesion	29	499	738	17915	1.41078	0.0598769	1	0.301208	62.3479
GOTERM_BP_3	GO:1901863~positive regulation of muscle tissue development	6	499	76	17915	2.83435	0.0603137	1	0.301651	62.6237
GOTERM_BP_3	GO:0071559~response to transforming growth factor beta	11	499	205	17915	1.92644	0.0603505	1	0.300382	62.6469
GOTERM_BP_3	GO:0050878~regulation of body fluid levels	16	499	349	17915	1.64593	0.0629517	1	0.30997	64.2496
GOTERM_BP_3	GO:0060259~regulation of feeding behavior	4	499	33	17915	4.35173	0.0629804	1	0.308651	64.2669
GOTERM_BP_3	GO:0044281~small molecule metabolic process	61	499	1772	17915	1.2359	0.0633943	1	0.308949	64.5158
GOTERM_BP_3	GO:0045760~positive regulation of action potential	3	499	15	17915	7.18036	0.063777	1	0.309114	64.7444
GOTERM_BP_3	GO:1901861~regulation of muscle tissue development	9	499	153	17915	2.11187	0.0640753	1	0.308931	64.9217
GOTERM_BP_3	GO:0050877~neurological system process	70	499	2077	17915	1.20998	0.0657163	1	0.314238	65.8822
GOTERM_BP_3	GO:0006959~humoral immune response	10	499	181	17915	1.98353	0.0663943	1	0.315571	66.2717
GOTERM_BP_3	GO:0050777~negative regulation of immune response	8	499	128	17915	2.24386	0.0664027	1	0.314193	66.2766
GOTERM_BP_3	GO:0050808~synapse organization	12	499	238	17915	1.81017	0.0688279	1	0.322483	67.636
GOTERM_BP_3	GO:0032410~negative regulation of transporter activity	5	499	56	17915	3.20552	0.0699447	1	0.325473	68.2447
GOTERM_BP_3	GO:0001818~negative regulation of cytokine production	11	499	213	17915	1.85408	0.0739773	1	0.339731	70.3543
GOTERM_BP_3	GO:0001666~response to hypoxia	14	499	299	17915	1.68102	0.0747533	1	0.341245	70.7448
GOTERM_BP_3	GO:0050921~positive regulation of chemotaxis	8	499	132	17915	2.17587	0.0755484	1	0.342815	71.14
GOTERM_BP_3	GO:0032350~regulation of hormone metabolic process	4	499	37	17915	3.88128	0.082808	1	0.368393	74.524
GOTERM_BP_3	GO:0098602~single organism cell adhesion	30	499	796	17915	1.35308	0.083173	1	0.368203	74.6839
GOTERM_BP_3	GO:0002698~negative regulation of immune effector process	7	499	109	17915	2.30562	0.0834864	1	0.367829	74.8205
GOTERM_BP_3	GO:0050865~regulation of cell activation	21	499	516	17915	1.46112	0.0853591	1	0.373071	75.6222
GOTERM_BP_3	GO:0007015~actin filament organization	15	499	336	17915	1.60276	0.087829	1	0.380345	76.643
GOTERM_BP_3	GO:0043046~DNA methylation involved in gamete generation	3	499	18	17915	5.98363	0.0880445	1	0.379583	76.7302
GOTERM_BP_3	GO:0032352~positive regulation of hormone metabolic process	3	499	18	17915	5.98363	0.0880445	1	0.379583	76.7302
GOTERM_BP_3	GO:1903532~positive regulation of secretion by cell	17	499	398	17915	1.53349	0.0904007	1	0.386306	77.6633
GOTERM_BP_3	GO:0006793~phosphorus metabolic process	92	499	2873	17915	1.14966	0.0950926	1	0.40088	79.418
GOTERM_BP_3	GO:0030220~platelet formation	3	499	19	17915	5.66871	0.0966552	1	0.404601	79.9731
GOTERM_BP_3	GO:0021692~cerebellar Purkinje cell layer morphogenesis	3	499	19	17915	5.66871	0.0966552	1	0.404601	79.9731
GOTERM_BP_3	GO:0051093~negative regulation of developmental process	31	499	845	17915	1.31711	0.098816	1	0.410259	80.7176
GOTERM_BP_3	GO:0032094~response to food	4	499	40	17915	3.59018	0.099209	1	0.410001	80.8502
GOTERM_BP_3	GO:0002683~negative regulation of immune system process	17	499	404	17915	1.51072	0.0996976	1	0.41006	81.0139

## Sheet: H3K4me3_only
Supplemental Table 5. Results from Gene Ontology (GO) analysis
Category	Term	Count	List Total	Pop Hits	Pop Total	Fold Enrichment	P-Value	Bonferroni	Benjamini	%FDR
GOTERM_BP_3	GO:0044260~cellular macromolecule metabolic process	5727	10286	8038	17915	1.24094	1.26197e-254	2.39269e-251	2.39269e-251	2.1562e-251
GOTERM_BP_3	GO:0006996~organelle organization	2892	10286	3620	17915	1.39143	2.01674e-220	3.82373e-217	1.91187e-217	3.44579e-217
GOTERM_BP_3	GO:0034641~cellular nitrogen compound metabolic process	4508	10286	6198	17915	1.26678	1.40884e-205	2.67117e-202	8.90389e-203	2.40715e-202
GOTERM_BP_3	GO:0043170~macromolecule metabolic process	6064	10286	8886	17915	1.18857	1.21317e-187	2.30017e-184	5.75042e-185	2.07282e-184
GOTERM_BP_3	GO:0006139~nucleobase-containing compound metabolic process	3961	10286	5389	17915	1.28017	1.21944e-185	2.31207e-182	4.62413e-183	2.08354e-182
GOTERM_BP_3	GO:0046483~heterocycle metabolic process	4025	10286	5497	17915	1.27529	3.38612e-184	6.42008e-181	1.07001e-181	5.78552e-181
GOTERM_BP_3	GO:0006725~cellular aromatic compound metabolic process	4050	10286	5560	17915	1.26868	3.47774e-178	6.59379e-175	9.4197e-176	5.94206e-175
GOTERM_BP_3	GO:1901360~organic cyclic compound metabolic process	4136	10286	5731	17915	1.25696	5.18498e-170	9.83072e-167	1.22884e-167	8.85905e-167
GOTERM_BP_3	GO:0044249~cellular biosynthetic process	4029	10286	5732	17915	1.22423	2.12297e-129	4.02515e-126	4.47238e-127	3.6273e-126
GOTERM_BP_3	GO:1901576~organic substance biosynthetic process	4082	10286	5830	17915	1.21948	4.83562e-127	9.16833e-124	9.16833e-125	8.26213e-124
GOTERM_BP_3	GO:0043933~macromolecular complex subunit organization	1759	10286	2229	17915	1.37444	2.31113e-114	4.3819e-111	3.98355e-112	3.9488e-111
GOTERM_BP_3	GO:0007049~cell cycle	1202	10286	1440	17915	1.45383	9.30392e-107	1.76402e-103	1.47002e-104	1.58967e-103
GOTERM_BP_3	GO:0033554~cellular response to stress	1350	10286	1690	17915	1.39129	1.33217e-92	2.5258e-89	1.94292e-90	2.27615e-89
GOTERM_BP_3	GO:0008104~protein localization	1803	10286	2367	17915	1.32668	2.28471e-92	4.33182e-89	3.09416e-90	3.90366e-89
GOTERM_BP_3	GO:0070727~cellular macromolecule localization	1224	10286	1512	17915	1.40994	1.29044e-90	2.44668e-87	1.63112e-88	2.20485e-87
GOTERM_BP_3	GO:0022607~cellular component assembly	1832	10286	2418	17915	1.31959	1.81951e-90	3.4498e-87	2.15612e-88	3.10882e-87
GOTERM_BP_3	GO:0046907~intracellular transport	1077	10286	1304	17915	1.4385	2.5377e-89	4.81147e-86	2.83028e-87	4.33591e-86
GOTERM_BP_3	GO:0080090~regulation of primary metabolic process	3830	10286	5629	17915	1.18505	3.29055e-86	6.23889e-83	3.46605e-84	5.62224e-83
GOTERM_BP_3	GO:0031323~regulation of cellular metabolic process	3850	10286	5673	17915	1.182	2.34259e-84	4.44154e-81	2.33765e-82	4.00254e-81
GOTERM_BP_3	GO:0051649~establishment of localization in cell	1351	10286	1722	17915	1.36645	1.76367e-82	3.34392e-79	1.67196e-80	3.0134e-79
GOTERM_BP_3	GO:0019538~protein metabolic process	3546	10286	5186	17915	1.1909	7.46008e-82	1.41443e-78	6.73539e-80	1.27463e-78
GOTERM_BP_3	GO:0051171~regulation of nitrogen compound metabolic process	2949	10286	4221	17915	1.21683	2.05333e-80	3.89311e-77	1.76959e-78	3.50831e-77
GOTERM_BP_3	GO:0045184~establishment of protein localization	1455	10286	1894	17915	1.33799	1.86505e-77	3.53613e-74	1.53745e-75	3.18661e-74
GOTERM_BP_3	GO:1902589~single-organism organelle organization	1324	10286	1714	17915	1.34539	1.08436e-72	2.05596e-69	8.56648e-71	1.85274e-69
GOTERM_BP_3	GO:0060255~regulation of macromolecule metabolic process	3837	10286	5739	17915	1.16446	2.527e-70	4.79119e-67	1.91648e-68	4.31763e-67
GOTERM_BP_3	GO:1903047~mitotic cell cycle process	613	10286	702	17915	1.52088	2.02004e-68	3.83e-65	1.47308e-66	3.45144e-65
GOTERM_BP_3	GO:0009889~regulation of biosynthetic process	2879	10286	4197	17915	1.19474	1.21566e-64	2.30489e-61	8.53662e-63	2.07707e-61
GOTERM_BP_3	GO:0022613~ribonucleoprotein complex biogenesis	384	10286	416	17915	1.60771	2.16495e-57	4.10475e-54	1.46598e-55	3.69904e-54
GOTERM_BP_3	GO:0051128~regulation of cellular component organization	1720	10286	2399	17915	1.24873	2.53985e-54	4.81556e-51	1.66054e-52	4.33959e-51
GOTERM_BP_3	GO:0044248~cellular catabolic process	1049	10286	1387	17915	1.31725	5.69286e-49	1.07937e-45	3.59788e-47	9.72681e-46
GOTERM_BP_3	GO:0051726~regulation of cell cycle	672	10286	834	17915	1.40337	2.67395e-47	5.06981e-44	1.63542e-45	4.56871e-44
GOTERM_BP_3	GO:0070271~protein complex biogenesis	972	10286	1278	17915	1.32466	4.10125e-47	7.77596e-44	2.42999e-45	7.00739e-44
GOTERM_BP_3	GO:0048522~positive regulation of cellular process	3172	10286	4808	17915	1.14905	7.99492e-46	1.51584e-42	4.59344e-44	1.36601e-42
GOTERM_BP_3	GO:1901575~organic substance catabolic process	1203	10286	1638	17915	1.27915	3.2365e-45	6.13641e-42	1.80483e-43	5.52989e-42
GOTERM_BP_3	GO:0051301~cell division	468	10286	554	17915	1.47132	2.1516e-43	4.07944e-40	1.16556e-41	3.67623e-40
GOTERM_BP_3	GO:0010604~positive regulation of macromolecule metabolic process	1923	10286	2794	17915	1.19873	1.30051e-41	2.46578e-38	6.84938e-40	2.22206e-38
GOTERM_BP_3	GO:0006793~phosphorus metabolic process	1972	10286	2873	17915	1.19548	1.35731e-41	2.57346e-38	6.95529e-40	2.31909e-38
GOTERM_BP_3	GO:0007059~chromosome segregation	275	10286	299	17915	1.60189	2.65284e-40	5.02978e-37	1.32363e-38	4.53264e-37
GOTERM_BP_3	GO:0007017~microtubule-based process	523	10286	642	17915	1.41885	2.65875e-39	5.04099e-36	1.29256e-37	4.54274e-36
GOTERM_BP_3	GO:0009893~positive regulation of metabolic process	2042	10286	3004	17915	1.18393	6.26817e-39	1.18844e-35	2.97111e-37	1.07098e-35
GOTERM_BP_3	GO:0031325~positive regulation of cellular metabolic process	1887	10286	2769	17915	1.18691	1.20902e-36	2.2923e-33	5.59096e-35	2.06572e-33
GOTERM_BP_3	GO:0006810~transport	2836	10286	4325	17915	1.14206	1.27722e-36	2.42161e-33	5.76573e-35	2.18225e-33
GOTERM_BP_3	GO:0051173~positive regulation of nitrogen compound metabolic process	1239	10286	1742	17915	1.23878	1.36466e-35	2.5874e-32	6.01721e-34	2.33166e-32
GOTERM_BP_3	GO:0048523~negative regulation of cellular process	2878	10286	4417	17915	1.13484	4.48276e-34	8.49932e-31	1.93166e-32	7.65924e-31
GOTERM_BP_3	GO:1902580~single-organism cellular localization	723	10286	960	17915	1.31171	1.63783e-32	3.10532e-29	6.90071e-31	2.79839e-29
GOTERM_BP_3	GO:0010256~endomembrane system organization	411	10286	502	17915	1.42596	6.86817e-32	1.30221e-28	2.83088e-30	1.1735e-28
GOTERM_BP_3	GO:1901564~organonitrogen compound metabolic process	1411	10286	2039	17915	1.20526	1.85117e-31	3.50982e-28	7.4677e-30	3.16291e-28
GOTERM_BP_3	GO:0080135~regulation of cellular response to stress	439	10286	546	17915	1.40037	1.51038e-30	2.86369e-27	5.96602e-29	2.58064e-27
GOTERM_BP_3	GO:0098813~nuclear chromosome segregation	214	10286	236	17915	1.57933	3.33071e-29	6.31503e-26	1.28878e-27	5.69085e-26
GOTERM_BP_3	GO:0008219~cell death	1379	10286	2003	17915	1.1991	3.72707e-29	7.06653e-26	1.41331e-27	6.36808e-26
GOTERM_BP_3	GO:0044770~cell cycle phase transition	296	10286	350	17915	1.47297	8.77991e-28	1.66467e-24	3.26406e-26	1.50013e-24
GOTERM_BP_3	GO:0051129~negative regulation of cellular component organization	516	10286	675	17915	1.33142	6.86621e-26	1.30183e-22	2.50353e-24	1.17316e-22
GOTERM_BP_3	GO:0006403~RNA localization	157	10286	167	17915	1.6374	7.04463e-26	1.33566e-22	2.52012e-24	1.20364e-22
GOTERM_BP_3	GO:0030030~cell projection organization	978	10286	1392	17915	1.22369	5.13618e-25	9.7382e-22	1.80337e-23	8.77568e-22
GOTERM_BP_3	GO:0009891~positive regulation of biosynthetic process	1198	10286	1744	17915	1.19641	1.18331e-24	2.24355e-21	4.07918e-23	2.02179e-21
GOTERM_BP_3	GO:0051130~positive regulation of cellular component organization	887	10286	1253	17915	1.23294	2.65226e-24	5.02869e-21	8.9798e-23	4.53165e-21
GOTERM_BP_3	GO:0031647~regulation of protein stability	195	10286	219	17915	1.55082	2.79716e-24	5.30342e-21	9.30424e-23	4.77923e-21
GOTERM_BP_3	GO:0044802~single-organism membrane organization	544	10286	724	17915	1.30867	3.59103e-24	6.8086e-21	1.1739e-22	6.13564e-21
GOTERM_BP_3	GO:0000075~cell cycle checkpoint	168	10286	184	17915	1.59024	7.62497e-24	1.4457e-20	2.45033e-22	1.3028e-20
GOTERM_BP_3	GO:0009894~regulation of catabolic process	363	10286	459	17915	1.37741	5.88358e-23	1.11553e-19	1.85921e-21	1.00527e-19
GOTERM_BP_3	GO:0044093~positive regulation of molecular function	891	10286	1270	17915	1.22192	1.64426e-22	3.11751e-19	5.11067e-21	2.80937e-19
GOTERM_BP_3	GO:0060341~regulation of cellular localization	630	10286	864	17915	1.26998	2.88674e-22	5.47327e-19	8.82785e-21	4.93229e-19
GOTERM_BP_3	GO:0009968~negative regulation of signal transduction	732	10286	1025	17915	1.24382	9.90021e-22	1.87708e-18	2.97949e-20	1.69155e-18
GOTERM_BP_3	GO:0050790~regulation of catalytic activity	1132	10286	1662	17915	1.18628	2.57633e-21	4.88472e-18	7.63238e-20	4.40191e-18
GOTERM_BP_3	GO:0010941~regulation of cell death	1104	10286	1620	17915	1.18693	6.5169e-21	1.2356e-17	1.90093e-19	1.11348e-17
GOTERM_BP_3	GO:0061024~membrane organization	623	10286	861	17915	1.26025	1.00394e-20	1.90348e-17	2.88405e-19	1.71534e-17
GOTERM_BP_3	GO:0031324~negative regulation of cellular metabolic process	1571	10286	2380	17915	1.14966	1.17226e-20	2.22261e-17	3.31733e-19	2.00293e-17
GOTERM_BP_3	GO:0009966~regulation of signal transduction	1624	10286	2468	17915	1.14607	1.55358e-20	2.94559e-17	4.33175e-19	2.65445e-17
GOTERM_BP_3	GO:0051236~establishment of RNA localization	128	10286	137	17915	1.62727	1.70008e-20	3.22336e-17	4.67153e-19	2.90476e-17
GOTERM_BP_3	GO:0032989~cellular component morphogenesis	953	10286	1382	17915	1.20103	2.08655e-20	3.9561e-17	5.65158e-19	3.56508e-17
GOTERM_BP_3	GO:0010970~establishment of localization by movement along microtubule	104	10286	107	17915	1.69286	2.09169e-20	3.96584e-17	5.58569e-19	3.57385e-17
GOTERM_BP_3	GO:0051640~organelle localization	339	10286	433	17915	1.36358	3.37311e-20	6.39542e-17	8.88252e-19	5.76329e-17
GOTERM_BP_3	GO:0045786~negative regulation of cell cycle	302	10286	379	17915	1.38784	3.71525e-20	7.04412e-17	9.64948e-19	6.34788e-17
GOTERM_BP_3	GO:0043414~macromolecule methylation	226	10286	272	17915	1.44714	1.9607e-19	3.71748e-16	5.02362e-18	3.35004e-16
GOTERM_BP_3	GO:0009892~negative regulation of metabolic process	1682	10286	2579	17915	1.13591	6.5687e-19	1.24543e-15	1.66057e-17	1.12233e-15
GOTERM_BP_3	GO:0016236~macroautophagy	252	10286	312	17915	1.40675	2.2097e-18	4.18959e-15	5.51262e-17	3.77549e-15
GOTERM_BP_3	GO:0010605~negative regulation of macromolecule metabolic process	1552	10286	2372	17915	1.13959	3.40919e-18	6.46383e-15	8.39458e-17	5.82494e-15
GOTERM_BP_3	GO:0010646~regulation of cell communication	1798	10286	2785	17915	1.12444	1.53913e-17	2.9182e-14	3.74128e-16	2.62976e-14
GOTERM_BP_3	GO:0010648~negative regulation of cell communication	801	10286	1160	17915	1.20267	1.72636e-17	3.27317e-14	4.14326e-16	2.94965e-14
GOTERM_BP_3	GO:0032880~regulation of protein localization	700	10286	1000	17915	1.21918	1.77318e-17	3.36195e-14	4.20244e-16	3.02966e-14
GOTERM_BP_3	GO:0051172~negative regulation of nitrogen compound metabolic process	1078	10286	1605	17915	1.16981	1.88103e-17	3.56644e-14	4.40301e-16	3.21393e-14
GOTERM_BP_3	GO:0023057~negative regulation of signaling	803	10286	1164	17915	1.20153	2.26618e-17	4.29668e-14	5.23985e-16	3.872e-14
GOTERM_BP_3	GO:1903829~positive regulation of cellular protein localization	278	10286	353	17915	1.37164	2.29001e-17	4.34186e-14	5.23115e-16	3.91271e-14
GOTERM_BP_3	GO:0010506~regulation of autophagy	176	10286	207	17915	1.48086	2.49879e-17	4.73771e-14	5.64013e-16	4.26943e-14
GOTERM_BP_3	GO:0010942~positive regulation of cell death	454	10286	620	17915	1.27536	1.85777e-16	4.20997e-13	4.996e-15	3.77476e-13
GOTERM_BP_3	GO:1901135~carbohydrate derivative metabolic process	745	10286	1079	17915	1.20256	5.896e-16	1.05249e-12	1.22125e-14	9.4369e-13
GOTERM_BP_3	GO:0032886~regulation of microtubule-based process	142	10286	163	17915	1.5173	6.40796e-16	1.26299e-12	1.45439e-14	1.14353e-12
GOTERM_BP_3	GO:0036503~ERAD pathway	83	10286	86	17915	1.68093	1.18024e-15	2.31548e-12	2.63123e-14	2.08722e-12
GOTERM_BP_3	GO:0022411~cellular component disassembly	309	10286	405	17915	1.32884	1.82913e-15	3.36797e-12	3.78586e-14	3.03091e-12
GOTERM_BP_3	GO:0043254~regulation of protein complex assembly	284	10286	368	17915	1.34413	2.0274e-15	3.78897e-12	4.20775e-14	3.41949e-12
GOTERM_BP_3	GO:0051098~regulation of binding	250	10286	321	17915	1.35645	1.69991e-14	3.22062e-11	3.53939e-13	2.90212e-11
GOTERM_BP_3	GO:0051656~establishment of organelle localization	271	10286	353	17915	1.3371	2.94876e-14	5.59925e-11	6.08624e-13	5.04596e-11
GOTERM_BP_3	GO:1901657~glycosyl compound metabolic process	271	10286	353	17915	1.3371	2.94876e-14	5.59925e-11	6.08624e-13	5.04596e-11
GOTERM_BP_3	GO:0051186~cofactor metabolic process	284	10286	373	17915	1.32611	4.19025e-14	7.93579e-11	8.53317e-13	7.15095e-11
GOTERM_BP_3	GO:0044711~single-organism biosynthetic process	803	10286	1187	17915	1.17824	7.49933e-14	1.42086e-10	1.51157e-12	1.28042e-10
GOTERM_BP_3	GO:0032204~regulation of telomere maintenance	66	10286	67	17915	1.71569	8.33113e-14	1.57874e-10	1.66178e-12	1.42264e-10
GOTERM_BP_3	GO:0006413~translational initiation	95	10286	104	17915	1.59096	1.15288e-13	2.18497e-10	2.27596e-12	1.96898e-10
GOTERM_BP_3	GO:0051983~regulation of chromosome segregation	81	10286	86	17915	1.64043	1.46401e-13	2.77647e-10	2.86238e-12	2.502e-10
GOTERM_BP_3	GO:0009890~negative regulation of biosynthetic process	1051	10286	1595	17915	1.14766	3.72325e-13	7.06011e-10	7.20424e-12	6.36224e-10
GOTERM_BP_3	GO:0007051~spindle organization	98	10286	109	17915	1.56592	4.87191e-13	9.23666e-10	9.32998e-12	8.32368e-10
GOTERM_BP_3	GO:0030029~actin filament-based process	465	10286	656	17915	1.23458	5.18522e-13	9.83027e-10	9.83025e-12	8.85869e-10
GOTERM_BP_3	GO:0045787~positive regulation of cell cycle	238	10286	309	17915	1.34149	6.57072e-13	1.24573e-09	1.23339e-11	1.1226e-09
GOTERM_BP_3	GO:0048585~negative regulation of response to stimulus	899	10286	1350	17915	1.15984	6.7455e-13	1.27899e-09	1.25391e-11	1.15257e-09
GOTERM_BP_3	GO:0035966~response to topologically incorrect protein	99	10286	111	17915	1.5534	1.15911e-12	2.1976e-09	2.13359e-11	1.98039e-09
GOTERM_BP_3	GO:0009896~positive regulation of catabolic process	203	10286	259	17915	1.36511	1.99968e-12	3.7915e-09	3.64567e-11	3.41674e-09
GOTERM_BP_3	GO:0051321~meiotic cell cycle	191	10286	242	17915	1.37464	3.00762e-12	5.7024e-09	5.43086e-11	5.13878e-09
GOTERM_BP_3	GO:0009314~response to radiation	315	10286	428	17915	1.28185	3.05687e-12	5.79586e-09	5.46779e-11	5.223e-09
GOTERM_BP_3	GO:0006979~response to oxidative stress	306	10286	415	17915	1.28423	4.39482e-12	8.33257e-09	7.78745e-11	7.50898e-09
GOTERM_BP_3	GO:0006520~cellular amino acid metabolic process	163	10286	203	17915	1.3985	1.06945e-11	2.02769e-08	1.87749e-10	1.82727e-08
GOTERM_BP_3	GO:0019637~organophosphate metabolic process	649	10286	957	17915	1.18114	1.20293e-11	2.28075e-08	2.09243e-10	2.05532e-08
GOTERM_BP_3	GO:0071166~ribonucleoprotein complex localization	67	10286	71	17915	1.64356	2.33338e-11	4.42408e-08	4.0219e-10	3.98681e-08
GOTERM_BP_3	GO:0007098~centrosome cycle	69	10286	74	17915	1.62401	4.73793e-11	8.98312e-08	8.0929e-10	8.09523e-08
GOTERM_BP_3	GO:0051304~chromosome separation	69	10286	74	17915	1.62401	4.73793e-11	8.98312e-08	8.0929e-10	8.09523e-08
GOTERM_BP_3	GO:1902115~regulation of organelle assembly	124	10286	149	17915	1.44946	4.78096e-11	9.06471e-08	8.09349e-10	8.16875e-08
GOTERM_BP_3	GO:2001022~positive regulation of response to DNA damage stimulus	72	10286	78	17915	1.60771	5.50677e-11	1.04408e-07	9.23966e-10	9.40885e-08
GOTERM_BP_3	GO:0010508~positive regulation of autophagy	75	10286	82	17915	1.59301	6.04782e-11	1.14667e-07	1.00585e-09	1.03333e-07
GOTERM_BP_3	GO:0090316~positive regulation of intracellular protein transport	198	10286	257	17915	1.34185	6.34047e-11	1.20215e-07	1.04535e-09	1.08333e-07
GOTERM_BP_3	GO:0055114~oxidation-reduction process	628	10286	930	17915	1.17611	8.45268e-11	1.60263e-07	1.38158e-09	1.44422e-07
GOTERM_BP_3	GO:0060548~negative regulation of cell death	696	10286	1042	17915	1.16335	1.60683e-10	3.04656e-07	2.6039e-09	2.74544e-07
GOTERM_BP_3	GO:0000910~cytokinesis	95	10286	110	17915	1.50418	2.08803e-10	3.9589e-07	3.355e-09	3.56761e-07
GOTERM_BP_3	GO:1903046~meiotic cell cycle process	154	10286	195	17915	1.37549	4.26349e-10	8.08357e-07	6.79292e-09	7.28459e-07
GOTERM_BP_3	GO:0032388~positive regulation of intracellular transport	221	10286	295	17915	1.30479	4.64631e-10	8.80939e-07	7.34116e-09	7.93867e-07
GOTERM_BP_3	GO:1903828~negative regulation of cellular protein localization	115	10286	139	17915	1.44096	5.40799e-10	1.02535e-06	8.474e-09	9.24008e-07
GOTERM_BP_3	GO:0044281~small molecule metabolic process	1137	10286	1772	17915	1.11755	8.4998e-10	1.61156e-06	1.32095e-08	1.45227e-06
GOTERM_BP_3	GO:0044723~single-organism carbohydrate metabolic process	427	10286	617	17915	1.20535	9.84747e-10	1.86708e-06	1.51795e-08	1.68254e-06
GOTERM_BP_3	GO:0021915~neural tube development	149	10286	189	17915	1.37308	1.06028e-09	2.01029e-06	1.6212e-08	1.81159e-06
GOTERM_BP_3	GO:0009653~anatomical structure morphogenesis	1717	10286	2744	17915	1.08982	1.78688e-09	3.38793e-06	2.71035e-08	3.05307e-06
GOTERM_BP_3	GO:0034330~cell junction organization	155	10286	199	17915	1.35659	2.30337e-09	4.36717e-06	3.46602e-08	3.93553e-06
GOTERM_BP_3	GO:0007126~meiotic nuclear division	144	10286	183	17915	1.37051	2.62969e-09	4.98588e-06	3.9259e-08	4.49308e-06
GOTERM_BP_3	GO:0032206~positive regulation of telomere maintenance	46	10286	47	17915	1.70463	2.86089e-09	5.42423e-06	4.23769e-08	4.88811e-06
GOTERM_BP_3	GO:0005975~carbohydrate metabolic process	488	10286	718	17915	1.18377	3.28639e-09	6.23097e-06	4.83023e-08	5.61512e-06
GOTERM_BP_3	GO:0006486~protein glycosylation	186	10286	246	17915	1.31689	3.62307e-09	6.86932e-06	5.28411e-08	6.19038e-06
GOTERM_BP_3	GO:0007062~sister chromatid cohesion	49	10286	51	17915	1.67339	4.54021e-09	8.6082e-06	6.57117e-08	7.75739e-06
GOTERM_BP_3	GO:0032535~regulation of cellular component size	271	10286	377	17915	1.25198	5.82861e-09	1.1051e-05	8.37201e-08	9.95876e-06
GOTERM_BP_3	GO:0016049~cell growth	328	10286	466	17915	1.22591	6.0054e-09	1.13862e-05	8.56108e-08	1.02608e-05
GOTERM_BP_3	GO:0016358~dendrite development	180	10286	239	17915	1.31173	1.10481e-08	2.09469e-05	1.56322e-07	1.88767e-05
GOTERM_BP_3	GO:0060284~regulation of cell development	663	10286	1006	17915	1.14785	1.30362e-08	2.47164e-05	1.83086e-07	2.22737e-05
GOTERM_BP_3	GO:0007015~actin filament organization	243	10286	336	17915	1.25961	1.5762e-08	2.98842e-05	2.1974e-07	2.69309e-05
GOTERM_BP_3	GO:0001824~blastocyst development	82	10286	97	17915	1.47235	3.49286e-08	6.62225e-05	4.83392e-07	5.9679e-05
GOTERM_BP_3	GO:0006091~generation of precursor metabolites and energy	240	10286	334	17915	1.25151	4.85695e-08	9.20836e-05	6.67303e-07	8.29858e-05
GOTERM_BP_3	GO:0044092~negative regulation of molecular function	608	10286	922	17915	1.14853	4.86048e-08	9.21504e-05	6.62983e-07	8.30461e-05
GOTERM_BP_3	GO:0051090~regulation of sequence-specific DNA binding transcription factor activity	245	10286	342	17915	1.2477	5.36248e-08	0.000101667	7.26233e-07	9.16232e-05
GOTERM_BP_3	GO:0007050~cell cycle arrest	104	10286	129	17915	1.40415	5.81786e-08	0.0001103	7.82316e-07	9.94038e-05
GOTERM_BP_3	GO:0010927~cellular component assembly involved in morphogenesis	230	10286	319	17915	1.25576	5.97912e-08	0.000113358	7.98339e-07	0.000102159
GOTERM_BP_3	GO:0090559~regulation of membrane permeability	49	10286	53	17915	1.61024	1.20985e-07	0.000229361	1.6041e-06	0.000206714
GOTERM_BP_3	GO:0080134~regulation of response to stress	769	10286	1191	17915	1.12457	1.52579e-07	0.000289248	2.00896e-06	0.000260696
GOTERM_BP_3	GO:2001021~negative regulation of response to DNA damage stimulus	45	10286	48	17915	1.63283	1.74599e-07	0.000330985	2.28303e-06	0.00029832
GOTERM_BP_3	GO:0032970~regulation of actin filament-based process	245	10286	345	17915	1.23685	1.77827e-07	0.000337104	2.30932e-06	0.000303835
GOTERM_BP_3	GO:0019827~stem cell population maintenance	117	10286	150	17915	1.35852	2.29063e-07	0.000434208	2.95443e-06	0.000391375
GOTERM_BP_3	GO:0044255~cellular lipid metabolic process	599	10286	915	17915	1.14019	2.8382e-07	0.000537978	3.63595e-06	0.000484933
GOTERM_BP_3	GO:0090317~negative regulation of intracellular protein transport	74	10286	88	17915	1.4646	2.85937e-07	0.00054199	3.6385e-06	0.000488551
GOTERM_BP_3	GO:0044089~positive regulation of cellular component biogenesis	306	10286	443	17915	1.20306	3.57381e-07	0.000677366	4.51729e-06	0.00061062
GOTERM_BP_3	GO:0048524~positive regulation of viral process	68	10286	80	17915	1.48043	4.3129e-07	0.000817391	5.41539e-06	0.000736899
GOTERM_BP_3	GO:0000422~mitophagy	133	10286	175	17915	1.32368	4.56035e-07	0.000864269	5.68842e-06	0.000779178
GOTERM_BP_3	GO:0055086~nucleobase-containing small molecule metabolic process	439	10286	657	17915	1.16378	4.67405e-07	0.000885808	5.79214e-06	0.000798605
GOTERM_BP_3	GO:0051298~centrosome duplication	46	10286	50	17915	1.60235	4.79005e-07	0.000907782	5.89735e-06	0.000818425
GOTERM_BP_3	GO:0006790~sulfur compound metabolic process	210	10286	293	17915	1.24831	4.85787e-07	0.000920629	5.94226e-06	0.000830013
GOTERM_BP_3	GO:0045454~cell redox homeostasis	57	10286	65	17915	1.52733	5.68641e-07	0.00107756	6.91115e-06	0.000971575
GOTERM_BP_3	GO:0031334~positive regulation of protein complex assembly	151	10286	203	17915	1.29554	6.91867e-07	0.00131092	8.35525e-06	0.00118212
GOTERM_BP_3	GO:0007507~heart development	404	10286	603	17915	1.1669	9.02117e-07	0.00170895	1.08254e-05	0.00154135
GOTERM_BP_3	GO:0010720~positive regulation of cell development	399	10286	595	17915	1.16796	9.17474e-07	0.00173802	1.09404e-05	0.00156758
GOTERM_BP_3	GO:0044712~single-organism catabolic process	473	10286	715	17915	1.15219	9.71243e-07	0.00183978	1.15092e-05	0.00165945
GOTERM_BP_3	GO:0015980~energy derivation by oxidation of organic compounds	174	10286	239	17915	1.26801	1.00418e-06	0.00190212	1.18256e-05	0.00171573
GOTERM_BP_3	GO:0007568~aging	211	10286	297	17915	1.23736	1.28837e-06	0.00243976	1.50786e-05	0.00220128
GOTERM_BP_3	GO:0060968~regulation of gene silencing	55	10286	63	17915	1.52052	1.29359e-06	0.00244965	1.50468e-05	0.00221021
GOTERM_BP_3	GO:0035148~tube formation	125	10286	165	17915	1.31946	1.41363e-06	0.00267666	1.63428e-05	0.0024153
GOTERM_BP_3	GO:0009967~positive regulation of signal transduction	844	10286	1328	17915	1.10692	1.64283e-06	0.00310996	1.88774e-05	0.0028069
GOTERM_BP_3	GO:0042594~response to starvation	124	10286	164	17915	1.31689	1.86669e-06	0.003533	2.13206e-05	0.00318938
GOTERM_BP_3	GO:0043487~regulation of RNA stability	66	10286	79	17915	1.45508	2.29686e-06	0.00434539	2.60766e-05	0.00392435
GOTERM_BP_3	GO:0032387~negative regulation of intracellular transport	86	10286	108	17915	1.3869	2.56291e-06	0.00484749	2.89238e-05	0.00437889
GOTERM_BP_3	GO:0034446~substrate adhesion-dependent cell spreading	68	10286	82	17915	1.44433	2.61977e-06	0.00495477	2.93906e-05	0.00447604
GOTERM_BP_3	GO:1904951~positive regulation of establishment of protein localization	351	10286	522	17915	1.17113	2.94738e-06	0.00557265	3.28714e-05	0.00503576
GOTERM_BP_3	GO:0006928~movement of cell or subcellular component	1079	10286	1724	17915	1.09007	3.06176e-06	0.00578829	3.39474e-05	0.00523119
GOTERM_BP_3	GO:0050792~regulation of viral process	214	10286	304	17915	1.22606	3.07726e-06	0.0058175	3.39209e-05	0.00525767
GOTERM_BP_3	GO:0022603~regulation of anatomical structure morphogenesis	663	10286	1033	17915	1.11785	3.90502e-06	0.0073766	4.27964e-05	0.00667191
GOTERM_BP_3	GO:0001558~regulation of cell growth	280	10286	410	17915	1.18945	4.99657e-06	0.00942878	5.4444e-05	0.00853678
GOTERM_BP_3	GO:0060322~head development	515	10286	791	17915	1.13397	5.25545e-06	0.00991488	5.69375e-05	0.00897907
GOTERM_BP_3	GO:0006082~organic acid metabolic process	568	10286	878	17915	1.12674	5.26646e-06	0.00993555	5.67327e-05	0.00899789
GOTERM_BP_3	GO:0045185~maintenance of protein location	75	10286	93	17915	1.40459	5.41927e-06	0.0102224	5.8049e-05	0.00925896
GOTERM_BP_3	GO:1903573~negative regulation of response to endoplasmic reticulum stress	34	10286	36	17915	1.64493	6.81276e-06	0.012834	7.2565e-05	0.0116396
GOTERM_BP_3	GO:0045132~meiotic chromosome segregation	72	10286	89	17915	1.40901	7.06611e-06	0.0133081	7.4843e-05	0.0120725
GOTERM_BP_3	GO:0043903~regulation of symbiosis, encompassing mutualism through parasitism	231	10286	334	17915	1.20458	9.2808e-06	0.0174426	9.77534e-05	0.015856
GOTERM_BP_3	GO:0031668~cellular response to extracellular stimulus	146	10286	201	17915	1.26511	9.94173e-06	0.0186731	0.000104136	0.0169851
GOTERM_BP_3	GO:0007420~brain development	485	10286	745	17915	1.13385	1.02241e-05	0.0191983	0.000106505	0.0174674
GOTERM_BP_3	GO:0043433~negative regulation of sequence-specific DNA binding transcription factor activity	104	10286	137	17915	1.32216	1.04583e-05	0.0196338	0.00010835	0.0178676
GOTERM_BP_3	GO:1900181~negative regulation of protein localization to nucleus	59	10286	71	17915	1.44732	1.25434e-05	0.0235019	0.000129244	0.0214295
GOTERM_BP_3	GO:0051651~maintenance of location in cell	83	10286	106	17915	1.36377	1.29906e-05	0.0243294	0.000133128	0.0221934
GOTERM_BP_3	GO:0009895~negative regulation of catabolic process	109	10286	145	17915	1.30927	1.33255e-05	0.0249488	0.000135826	0.0227655
GOTERM_BP_3	GO:0022900~electron transport chain	63	10286	77	17915	1.42502	1.54773e-05	0.0289187	0.000156913	0.0264412
GOTERM_BP_3	GO:0035295~tube development	457	10286	702	17915	1.13383	1.87349e-05	0.0348982	0.000188927	0.0320056
GOTERM_BP_3	GO:0071496~cellular response to external stimulus	193	10286	276	17915	1.21792	1.88233e-05	0.03506	0.000188814	0.0321566
GOTERM_BP_3	GO:0051985~negative regulation of chromosome segregation	37	10286	41	17915	1.57177	2.63225e-05	0.0486832	0.00026264	0.0449651
GOTERM_BP_3	GO:0048589~developmental growth	463	10286	714	17915	1.12941	2.93057e-05	0.0540489	0.000290871	0.0500599
GOTERM_BP_3	GO:0032205~negative regulation of telomere maintenance	24	10286	24	17915	1.74169	3.06136e-05	0.0563918	0.000302268	0.0522935
GOTERM_BP_3	GO:0007275~multicellular organism development	3104	10286	5195	17915	1.04065	3.17012e-05	0.0583357	0.000311384	0.0541509
GOTERM_BP_3	GO:0022406~membrane docking	54	10286	65	17915	1.44694	3.30001e-05	0.060652	0.00032247	0.0563691
GOTERM_BP_3	GO:0023056~positive regulation of signaling	933	10286	1497	17915	1.0855	3.75716e-05	0.0687589	0.000365251	0.0641754
GOTERM_BP_3	GO:0048646~anatomical structure formation involved in morphogenesis	793	10286	1263	17915	1.09355	4.04962e-05	0.0739087	0.00039167	0.0691693
GOTERM_BP_3	GO:1900182~positive regulation of protein localization to nucleus	99	10286	132	17915	1.30627	4.12238e-05	0.0751853	0.000396682	0.0704116
GOTERM_BP_3	GO:0035239~tube morphogenesis	277	10286	413	17915	1.16815	4.598e-05	0.083488	0.000440207	0.0785323
GOTERM_BP_3	GO:0051984~positive regulation of chromosome segregation	23	10286	23	17915	1.74169	5.12647e-05	0.0926258	0.000488325	0.0875547
GOTERM_BP_3	GO:0060491~regulation of cell projection assembly	117	10286	160	17915	1.27361	5.19157e-05	0.0937452	0.000492053	0.0886661
GOTERM_BP_3	GO:0061077~chaperone-mediated protein folding	43	10286	50	17915	1.49785	5.65347e-05	0.101648	0.000533156	0.0965513
GOTERM_BP_3	GO:0010647~positive regulation of cell communication	927	10286	1490	17915	1.08359	5.73597e-05	0.103052	0.000538256	0.0979595
GOTERM_BP_3	GO:0060627~regulation of vesicle-mediated transport	301	10286	453	17915	1.15728	6.2633e-05	0.111975	0.000584833	0.106961
GOTERM_BP_3	GO:1902117~positive regulation of organelle assembly	52	10286	63	17915	1.43758	6.75189e-05	0.120164	0.000627353	0.1153
GOTERM_BP_3	GO:0090342~regulation of cell aging	32	10286	35	17915	1.5924	6.83797e-05	0.121599	0.00063225	0.116769
GOTERM_BP_3	GO:0060560~developmental growth involved in morphogenesis	162	10286	231	17915	1.22144	7.34635e-05	0.130026	0.000675946	0.125446
GOTERM_BP_3	GO:0072593~reactive oxygen species metabolic process	163	10286	233	17915	1.21843	8.53829e-05	0.149468	0.000781786	0.145785
GOTERM_BP_3	GO:0008608~attachment of spindle microtubules to kinetochore	22	10286	22	17915	1.74169	8.56982e-05	0.149976	0.0007809	0.146323
GOTERM_BP_3	GO:0051222~positive regulation of protein transport	321	10286	487	17915	1.14801	9.02327e-05	0.157253	0.000818272	0.15406
GOTERM_BP_3	GO:0019080~viral gene expression	44	10286	52	17915	1.47374	9.78043e-05	0.169266	0.000882686	0.166977
GOTERM_BP_3	GO:1903749~positive regulation of establishment of protein localization to mitochondrion	66	10286	84	17915	1.36847	9.97808e-05	0.172374	0.000896251	0.170349
GOTERM_BP_3	GO:0007131~reciprocal meiotic recombination	39	10286	45	17915	1.50946	0.000102385	0.17645	0.000915293	0.17479
GOTERM_BP_3	GO:0044786~cell cycle DNA replication	28	10286	30	17915	1.62558	0.000111785	0.190999	0.000994601	0.190823
GOTERM_BP_3	GO:0048588~developmental cell growth	151	10286	215	17915	1.22323	0.000117842	0.200239	0.00104358	0.201154
GOTERM_BP_3	GO:0051961~negative regulation of nervous system development	217	10286	320	17915	1.18108	0.000120261	0.203898	0.00106004	0.205279
GOTERM_BP_3	GO:0071495~cellular response to endogenous stimulus	744	10286	1189	17915	1.08984	0.000128874	0.216795	0.00113066	0.219966
GOTERM_BP_3	GO:0071214~cellular response to abiotic stimulus	198	10286	290	17915	1.18915	0.000135685	0.226846	0.0011849	0.231579
GOTERM_BP_3	GO:0030308~negative regulation of cell growth	129	10286	181	17915	1.24131	0.000142155	0.236274	0.00123568	0.242609
GOTERM_BP_3	GO:0016032~viral process	382	10286	589	17915	1.12958	0.000148134	0.244883	0.00128175	0.2528
GOTERM_BP_3	GO:0060996~dendritic spine development	70	10286	91	17915	1.33976	0.000188412	0.300412	0.00162261	0.321434
GOTERM_BP_3	GO:0032088~negative regulation of NF-kappaB transcription factor activity	53	10286	66	17915	1.39863	0.000217571	0.338046	0.00186504	0.371092
GOTERM_BP_3	GO:0051653~spindle localization	37	10286	43	17915	1.49866	0.000224492	0.346678	0.00191566	0.382875
GOTERM_BP_3	GO:0021987~cerebral cortex development	88	10286	119	17915	1.28797	0.00027064	0.401425	0.00229871	0.46141
GOTERM_BP_3	GO:0009725~response to hormone	521	10286	822	17915	1.10392	0.000272119	0.403101	0.00230095	0.463926
GOTERM_BP_3	GO:0007163~establishment or maintenance of cell polarity	133	10286	189	17915	1.22563	0.000273189	0.404311	0.00229974	0.465746
GOTERM_BP_3	GO:0001666~response to hypoxia	202	10286	299	17915	1.17666	0.000287632	0.420407	0.00241049	0.490313
GOTERM_BP_3	GO:0048468~cell development	1384	10286	2278	17915	1.05816	0.000334735	0.46994	0.00279241	0.570391
GOTERM_BP_3	GO:0043902~positive regulation of multi-organism process	103	10286	143	17915	1.2545	0.000392687	0.525114	0.00326081	0.668829
GOTERM_BP_3	GO:0008360~regulation of cell shape	103	10286	143	17915	1.2545	0.000392687	0.525114	0.00326081	0.668829
GOTERM_BP_3	GO:0034101~erythrocyte homeostasis	92	10286	126	17915	1.27171	0.000400156	0.531794	0.00330826	0.68151
GOTERM_BP_3	GO:0032922~circadian regulation of gene expression	49	10286	61	17915	1.39906	0.000400519	0.532117	0.00329689	0.682127
GOTERM_BP_3	GO:0003279~cardiac septum development	86	10286	117	17915	1.28021	0.000447785	0.572239	0.0036694	0.762335
GOTERM_BP_3	GO:1900076~regulation of cellular response to insulin stimulus	59	10286	76	17915	1.3521	0.000450445	0.574392	0.00367528	0.766848
GOTERM_BP_3	GO:0070849~response to epidermal growth factor	35	10286	41	17915	1.48681	0.000484441	0.600971	0.00393525	0.824498
GOTERM_BP_3	GO:0030307~positive regulation of cell growth	121	10286	172	17915	1.22526	0.000541551	0.641941	0.00437952	0.921274
GOTERM_BP_3	GO:0044403~symbiosis, encompassing mutualism through parasitism	408	10286	639	17915	1.11206	0.000572903	0.662617	0.00461288	0.974364
GOTERM_BP_3	GO:0045926~negative regulation of growth	173	10286	255	17915	1.18162	0.000594511	0.676167	0.00476627	1.01094
GOTERM_BP_3	GO:0070192~chromosome organization involved in meiotic cell cycle	54	10286	69	17915	1.36306	0.000597863	0.67822	0.00477291	1.01661
GOTERM_BP_3	GO:0044803~multi-organism membrane organization	18	10286	18	17915	1.74169	0.000655609	0.71161	0.00521092	1.11429
GOTERM_BP_3	GO:0010721~negative regulation of cell development	238	10286	361	17915	1.14826	0.0007493	0.758577	0.00592882	1.27257
GOTERM_BP_3	GO:0097194~execution phase of apoptosis	47	10286	59	17915	1.38745	0.000766514	0.766335	0.00603948	1.30162
GOTERM_BP_3	GO:1901888~regulation of cell junction assembly	55	10286	71	17915	1.34919	0.000813028	0.786075	0.00637844	1.38009
GOTERM_BP_3	GO:0051094~positive regulation of developmental process	773	10286	1252	17915	1.07534	0.000851876	0.801277	0.0066548	1.44558
GOTERM_BP_3	GO:0006629~lipid metabolic process	752	10286	1217	17915	1.07621	0.000890479	0.815314	0.00692693	1.51062
GOTERM_BP_3	GO:0006099~tricarboxylic acid cycle	26	10286	29	17915	1.56151	0.000908232	0.821433	0.00703575	1.54052
GOTERM_BP_3	GO:0048729~tissue morphogenesis	411	10286	647	17915	1.10639	0.000963495	0.839212	0.00743211	1.63353
GOTERM_BP_3	GO:2000145~regulation of cell motility	492	10286	782	17915	1.09579	0.00100132	0.85035	0.00769163	1.69715
GOTERM_BP_3	GO:0051701~interaction with host	64	10286	85	17915	1.31139	0.00101568	0.854373	0.00777007	1.72128
GOTERM_BP_3	GO:0033059~cellular pigmentation	35	10286	42	17915	1.45141	0.00113883	0.884728	0.00867369	1.92809
GOTERM_BP_3	GO:0001832~blastocyst growth	25	10286	28	17915	1.55508	0.00137713	0.926674	0.0104385	2.32708
GOTERM_BP_3	GO:0010507~negative regulation of autophagy	43	10286	54	17915	1.3869	0.00141191	0.931359	0.0106583	2.38518
GOTERM_BP_3	GO:0030323~respiratory tube development	158	10286	234	17915	1.17601	0.00142789	0.933411	0.0107356	2.41187
GOTERM_BP_3	GO:0051091~positive regulation of sequence-specific DNA binding transcription factor activity	144	10286	212	17915	1.18303	0.00164254	0.955702	0.0122922	2.76968
GOTERM_BP_3	GO:0051270~regulation of cellular component movement	528	10286	846	17915	1.08701	0.001744	0.963466	0.0129959	2.93837
GOTERM_BP_3	GO:0006903~vesicle targeting	19	10286	20	17915	1.6546	0.00181292	0.967948	0.0134536	3.05279
GOTERM_BP_3	GO:0048869~cellular developmental process	2648	10286	4465	17915	1.03292	0.00182532	0.968695	0.0134923	3.07337
GOTERM_BP_3	GO:0070988~demethylation	40	10286	50	17915	1.39335	0.00189297	0.97247	0.0139351	3.18554
GOTERM_BP_3	GO:0021543~pallium development	123	10286	179	17915	1.1968	0.00196768	0.976112	0.0144257	3.3093
GOTERM_BP_3	GO:1904950~negative regulation of establishment of protein localization	159	10286	237	17915	1.16847	0.00208271	0.980802	0.0152047	3.49953
GOTERM_BP_3	GO:0090066~regulation of anatomical structure size	341	10286	536	17915	1.10805	0.00228221	0.986859	0.0165868	3.82862
GOTERM_BP_3	GO:0030324~lung development	155	10286	231	17915	1.16866	0.00235276	0.988508	0.0170306	3.94475
GOTERM_BP_3	GO:0001825~blastocyst formation	35	10286	43	17915	1.41765	0.00244115	0.990285	0.0175984	4.09005
GOTERM_BP_3	GO:0048144~fibroblast proliferation	73	10286	101	17915	1.25884	0.00274643	0.994562	0.0197055	4.5903
GOTERM_BP_3	GO:0006575~cellular modified amino acid metabolic process	94	10286	134	17915	1.22178	0.00279544	0.995046	0.0199786	4.67039
GOTERM_BP_3	GO:0060148~positive regulation of posttranscriptional gene silencing	15	10286	15	17915	1.74169	0.00293258	0.996183	0.0208713	4.89414
GOTERM_BP_3	GO:1904872~regulation of telomerase RNA localization to Cajal body	15	10286	15	17915	1.74169	0.00293258	0.996183	0.0208713	4.89414
GOTERM_BP_3	GO:1904874~positive regulation of telomerase RNA localization to Cajal body	15	10286	15	17915	1.74169	0.00293258	0.996183	0.0208713	4.89414
GOTERM_BP_3	GO:0045597~positive regulation of cell differentiation	606	10286	981	17915	1.0759	0.00294006	0.996237	0.0208459	4.90633
GOTERM_BP_3	GO:0035264~multicellular organism growth	119	10286	174	17915	1.19115	0.0030187	0.99676	0.0213187	5.03439
GOTERM_BP_3	GO:0034405~response to fluid shear stress	30	10286	36	17915	1.45141	0.00305718	0.996988	0.021508	5.09701
GOTERM_BP_3	GO:0010810~regulation of cell-substrate adhesion	122	10286	179	17915	1.18707	0.00320101	0.997709	0.022427	5.33068
GOTERM_BP_3	GO:0032231~regulation of actin filament bundle assembly	65	10286	89	17915	1.27202	0.00329988	0.998102	0.0230278	5.49099
GOTERM_BP_3	GO:0051049~regulation of transport	1105	10286	1828	17915	1.05283	0.00337566	0.998357	0.023465	5.61368
GOTERM_BP_3	GO:0048731~system development	2726	10286	4610	17915	1.0299	0.00344813	0.998568	0.0238762	5.73088
GOTERM_BP_3	GO:0007099~centriole replication	20	10286	22	17915	1.58335	0.00383777	0.999318	0.026447	6.35867
GOTERM_BP_3	GO:0032846~positive regulation of homeostatic process	148	10286	222	17915	1.16113	0.00430528	0.99972	0.0295204	7.1067
GOTERM_BP_3	GO:0039694~viral RNA genome replication	17	10286	18	17915	1.64493	0.00450764	0.999809	0.0307785	7.42876
GOTERM_BP_3	GO:0051050~positive regulation of transport	618	10286	1005	17915	1.07101	0.00459334	0.999838	0.0312434	7.56482
GOTERM_BP_3	GO:1902590~multi-organism organelle organization	14	10286	14	17915	1.74169	0.00479799	0.99989	0.0324996	7.88899
GOTERM_BP_3	GO:0048598~embryonic morphogenesis	405	10286	648	17915	1.08855	0.00523764	0.999953	0.0353063	8.58178
GOTERM_BP_3	GO:2000036~regulation of stem cell population maintenance	24	10286	28	17915	1.49288	0.00530018	0.999958	0.0355952	8.67993
GOTERM_BP_3	GO:0071559~response to transforming growth factor beta	137	10286	205	17915	1.16396	0.00531178	0.999959	0.0355463	8.69813
GOTERM_BP_3	GO:0023014~signal transduction by protein phosphorylation	433	10286	695	17915	1.08511	0.00531781	0.999959	0.0354612	8.70758
GOTERM_BP_3	GO:0021537~telencephalon development	175	10286	267	17915	1.14156	0.00551909	0.999972	0.0366536	9.02271
GOTERM_BP_3	GO:0045927~positive regulation of growth	181	10286	277	17915	1.13807	0.00574846	0.999982	0.0380192	9.38057
GOTERM_BP_3	GO:0042168~heme metabolic process	26	10286	31	17915	1.46077	0.00579428	0.999984	0.0381844	9.4519
GOTERM_BP_3	GO:0034637~cellular carbohydrate biosynthetic process	48	10286	64	17915	1.30627	0.00581786	0.999984	0.0382048	9.48858
GOTERM_BP_3	GO:0048638~regulation of developmental growth	229	10286	356	17915	1.12036	0.00586755	0.999986	0.0383932	9.56585
GOTERM_BP_3	GO:0031589~cell-substrate adhesion	193	10286	297	17915	1.1318	0.00616303	0.999992	0.040155	10.024
GOTERM_BP_3	GO:0051962~positive regulation of nervous system development	351	10286	559	17915	1.09362	0.00628156	0.999994	0.040774	10.2072
GOTERM_BP_3	GO:0010718~positive regulation of epithelial to mesenchymal transition	30	10286	37	17915	1.41218	0.00639432	0.999995	0.0413518	10.3811
GOTERM_BP_3	GO:1900077~negative regulation of cellular response to insulin stimulus	32	10286	40	17915	1.39335	0.00653917	0.999996	0.0421283	10.6041
GOTERM_BP_3	GO:1990089~response to nerve growth factor	32	10286	40	17915	1.39335	0.00653917	0.999996	0.0421283	10.6041
GOTERM_BP_3	GO:0036119~response to platelet-derived growth factor	21	10286	24	17915	1.52398	0.00689736	0.999998	0.0442421	11.1532
GOTERM_BP_3	GO:0016477~cell migration	730	10286	1199	17915	1.06041	0.007447	0.999999	0.0475353	11.9896
GOTERM_BP_3	GO:1903337~positive regulation of vacuolar transport	13	10286	13	17915	1.74169	0.00781634	1	0.0496758	12.5475
GOTERM_BP_3	GO:0051302~regulation of cell division	92	10286	134	17915	1.19579	0.00802824	1	0.0508233	12.8661
GOTERM_BP_3	GO:0043954~cellular component maintenance	25	10286	30	17915	1.45141	0.00826541	1	0.0521178	13.2214
GOTERM_BP_3	GO:0048640~negative regulation of developmental growth	73	10286	104	17915	1.22253	0.0087183	1	0.0547249	13.896
GOTERM_BP_3	GO:0090287~regulation of cellular response to growth factor stimulus	156	10286	238	17915	1.14161	0.00874672	1	0.0547187	13.9381
GOTERM_BP_3	GO:1904376~negative regulation of protein localization to cell periphery	18	10286	20	17915	1.56752	0.00883242	1	0.0550613	14.0652
GOTERM_BP_3	GO:2000026~regulation of multicellular organismal development	1133	10286	1888	17915	1.0452	0.0093186	1	0.0578274	14.7826
GOTERM_BP_3	GO:0010171~body morphogenesis	46	10286	62	17915	1.29222	0.00979521	1	0.0605108	15.4803
GOTERM_BP_3	GO:0016458~gene silencing	186	10286	288	17915	1.12484	0.0102457	1	0.0630137	16.1349
GOTERM_BP_3	GO:0042026~protein refolding	15	10286	16	17915	1.63283	0.0109611	1	0.0670704	17.1647
GOTERM_BP_3	GO:0001833~inner cell mass cell proliferation	15	10286	16	17915	1.63283	0.0109611	1	0.0670704	17.1647
GOTERM_BP_3	GO:0051224~negative regulation of protein transport	148	10286	226	17915	1.14057	0.0111427	1	0.0679309	17.4242
GOTERM_BP_3	GO:0051817~modification of morphology or physiology of other organism involved in symbiotic interaction	58	10286	81	17915	1.24713	0.0111466	1	0.0677371	17.4296
GOTERM_BP_3	GO:0035383~thioester metabolic process	58	10286	81	17915	1.24713	0.0111466	1	0.0677371	17.4296
GOTERM_BP_3	GO:0048870~cell motility	815	10286	1348	17915	1.05302	0.0113498	1	0.0687166	17.7191
GOTERM_BP_3	GO:0033002~muscle cell proliferation	127	10286	192	17915	1.15205	0.0119174	1	0.0718187	18.5225
GOTERM_BP_3	GO:0043482~cellular pigment accumulation	12	10286	12	17915	1.74169	0.0126711	1	0.0759721	19.578
GOTERM_BP_3	GO:1904294~positive regulation of ERAD pathway	12	10286	12	17915	1.74169	0.0126711	1	0.0759721	19.578
GOTERM_BP_3	GO:0034086~maintenance of sister chromatid cohesion	12	10286	12	17915	1.74169	0.0126711	1	0.0759721	19.578
GOTERM_BP_3	GO:0048584~positive regulation of response to stimulus	1099	10286	1834	17915	1.04368	0.0128687	1	0.0768756	19.8524
GOTERM_BP_3	GO:0051307~meiotic chromosome separation	17	10286	19	17915	1.55835	0.0132639	1	0.0789095	20.399
GOTERM_BP_3	GO:0044804~nucleophagy	17	10286	19	17915	1.55835	0.0132639	1	0.0789095	20.399
GOTERM_BP_3	GO:0048525~negative regulation of viral process	69	10286	99	17915	1.2139	0.013902	1	0.082314	21.2739
GOTERM_BP_3	GO:0042592~homeostatic process	1024	10286	1707	17915	1.04481	0.0140827	1	0.083088	21.52
GOTERM_BP_3	GO:0048732~gland development	305	10286	488	17915	1.08855	0.0147852	1	0.0868091	22.47
GOTERM_BP_3	GO:0030900~forebrain development	260	10286	413	17915	1.09646	0.0152108	1	0.0889387	23.0403
GOTERM_BP_3	GO:0009649~entrainment of circadian clock	21	10286	25	17915	1.46302	0.0158798	1	0.0924115	23.9288
GOTERM_BP_3	GO:0051092~positive regulation of NF-kappaB transcription factor activity	75	10286	109	17915	1.19841	0.0159547	1	0.0925483	24.0276
GOTERM_BP_3	GO:0006482~protein demethylation	25	10286	31	17915	1.40459	0.0167379	1	0.0966079	25.0541
GOTERM_BP_3	GO:0051782~negative regulation of cell division	14	10286	15	17915	1.62558	0.0169232	1	0.0973388	25.295
GOTERM_BP_3	GO:0045595~regulation of cell differentiation	1078	10286	1802	17915	1.04192	0.0174219	1	0.0997838	25.94
GOTERM_BP_3	GO:0044765~single-organism transport	1850	10286	3128	17915	1.03009	0.0175814	1	0.100357	26.1451
GOTERM_BP_3	GO:1904816~positive regulation of protein localization to chromosome, telomeric region	11	10286	11	17915	1.74169	0.0204251	1	0.115431	29.714
GOTERM_BP_3	GO:0006991~response to sterol depletion	11	10286	11	17915	1.74169	0.0204251	1	0.115431	29.714
GOTERM_BP_3	GO:0045023~G0 to G1 transition	11	10286	11	17915	1.74169	0.0204251	1	0.115431	29.714
GOTERM_BP_3	GO:0090343~positive regulation of cell aging	11	10286	11	17915	1.74169	0.0204251	1	0.115431	29.714
GOTERM_BP_3	GO:0008340~determination of adult lifespan	18	10286	21	17915	1.49288	0.0215474	1	0.121082	31.0772
GOTERM_BP_3	GO:0090004~positive regulation of establishment of protein localization to plasma membrane	26	10286	33	17915	1.37224	0.0227793	1	0.127247	32.5449
GOTERM_BP_3	GO:0044262~cellular carbohydrate metabolic process	167	10286	261	17915	1.11441	0.0235431	1	0.130889	33.4401
GOTERM_BP_3	GO:0045682~regulation of epidermis development	49	10286	69	17915	1.23685	0.0257375	1	0.141919	35.9502
GOTERM_BP_3	GO:0000712~resolution of meiotic recombination intermediates	13	10286	14	17915	1.61728	0.0259265	1	0.142487	36.1621
GOTERM_BP_3	GO:0072422~signal transduction involved in DNA damage checkpoint	13	10286	14	17915	1.61728	0.0259265	1	0.142487	36.1621
GOTERM_BP_3	GO:1904377~positive regulation of protein localization to cell periphery	31	10286	41	17915	1.31689	0.0276195	1	0.150744	38.0317
GOTERM_BP_3	GO:0090130~tissue migration	156	10286	244	17915	1.11354	0.0294164	1	0.15941	39.9594
GOTERM_BP_3	GO:0044091~membrane biogenesis	25	10286	32	17915	1.36069	0.0307319	1	0.165551	41.3347
GOTERM_BP_3	GO:0008285~negative regulation of cell proliferation	397	10286	649	17915	1.06541	0.0316144	1	0.169476	42.2408
GOTERM_BP_3	GO:0032878~regulation of establishment or maintenance of cell polarity	19	10286	23	17915	1.43879	0.0317554	1	0.169703	42.3842
GOTERM_BP_3	GO:0010634~positive regulation of epithelial cell migration	71	10286	105	17915	1.17771	0.0328791	1	0.17476	43.5161
GOTERM_BP_3	GO:0070887~cellular response to chemical stimulus	1541	10286	2607	17915	1.02951	0.03362	1	0.177898	44.2509
GOTERM_BP_3	GO:0010811~positive regulation of cell-substrate adhesion	74	10286	110	17915	1.17168	0.0341863	1	0.180162	44.8065
GOTERM_BP_3	GO:0007164~establishment of tissue polarity	39	10286	54	17915	1.25789	0.0348863	1	0.183052	45.486
GOTERM_BP_3	GO:0051093~negative regulation of developmental process	512	10286	845	17915	1.05532	0.0348926	1	0.182587	45.492
GOTERM_BP_3	GO:0060759~regulation of response to cytokine stimulus	59	10286	86	17915	1.19488	0.0365267	1	0.189902	47.0477
GOTERM_BP_3	GO:0010828~positive regulation of glucose transport	37	10286	51	17915	1.26358	0.0370359	1	0.191809	47.5239
GOTERM_BP_3	GO:1900408~negative regulation of cellular response to oxidative stress	35	10286	48	17915	1.26998	0.0392949	1	0.201913	49.5879
GOTERM_BP_3	GO:1902883~negative regulation of response to oxidative stress	35	10286	48	17915	1.26998	0.0392949	1	0.201913	49.5879
GOTERM_BP_3	GO:0090151~establishment of protein localization to mitochondrial membrane	12	10286	13	17915	1.60771	0.0393725	1	0.201742	49.6574
GOTERM_BP_3	GO:0007288~sperm axoneme assembly	12	10286	13	17915	1.60771	0.0393725	1	0.201742	49.6574
GOTERM_BP_3	GO:0043476~pigment accumulation	12	10286	13	17915	1.60771	0.0393725	1	0.201742	49.6574
GOTERM_BP_3	GO:0034260~negative regulation of GTPase activity	24	10286	31	17915	1.3484	0.0411258	1	0.209332	51.2045
GOTERM_BP_3	GO:0001881~receptor recycling	24	10286	31	17915	1.3484	0.0411258	1	0.209332	51.2045
GOTERM_BP_3	GO:0090344~negative regulation of cell aging	14	10286	16	17915	1.52398	0.0427586	1	0.216269	52.605
GOTERM_BP_3	GO:0001921~positive regulation of receptor recycling	14	10286	16	17915	1.52398	0.0427586	1	0.216269	52.605
GOTERM_BP_3	GO:0045724~positive regulation of cilium assembly	18	10286	22	17915	1.42502	0.0443066	1	0.222735	53.8976
GOTERM_BP_3	GO:0009408~response to heat	66	10286	98	17915	1.17297	0.0445763	1	0.223379	54.1194
GOTERM_BP_3	GO:0051668~localization within membrane	53	10286	77	17915	1.19882	0.0446575	1	0.223171	54.1859
GOTERM_BP_3	GO:0032844~regulation of homeostatic process	301	10286	490	17915	1.06989	0.0455453	1	0.226574	54.908
GOTERM_BP_3	GO:0002831~regulation of response to biotic stimulus	140	10286	220	17915	1.10835	0.0464129	1	0.229857	55.6033
GOTERM_BP_3	GO:0014009~glial cell proliferation	29	10286	39	17915	1.2951	0.0466754	1	0.230437	55.8116
GOTERM_BP_3	GO:0060411~cardiac septum morphogenesis	51	10286	74	17915	1.20035	0.0477848	1	0.23474	56.682
GOTERM_BP_3	GO:0090288~negative regulation of cellular response to growth factor stimulus	83	10286	126	17915	1.1473	0.0477956	1	0.234198	56.6904
GOTERM_BP_3	GO:0051272~positive regulation of cellular component movement	290	10286	472	17915	1.0701	0.0486995	1	0.237557	57.3875
GOTERM_BP_3	GO:0051445~regulation of meiotic cell cycle	34	10286	47	17915	1.25994	0.0497384	1	0.241469	58.1757
GOTERM_BP_3	GO:0030850~prostate gland development	39	10286	55	17915	1.23501	0.0511732	1	0.247042	59.2417
GOTERM_BP_3	GO:0002200~somatic diversification of immune receptors	44	10286	63	17915	1.21642	0.0515259	1	0.247943	59.4998
GOTERM_BP_3	GO:2000774~positive regulation of cellular senescence	9	10286	9	17915	1.74169	0.0519648	1	0.249204	59.8188
GOTERM_BP_3	GO:1901030~positive regulation of mitochondrial outer membrane permeabilization involved in apoptotic signaling pathway	9	10286	9	17915	1.74169	0.0519648	1	0.249204	59.8188
GOTERM_BP_3	GO:1904851~positive regulation of establishment of protein localization to telomere	9	10286	9	17915	1.74169	0.0519648	1	0.249204	59.8188
GOTERM_BP_3	GO:0090153~regulation of sphingolipid biosynthetic process	9	10286	9	17915	1.74169	0.0519648	1	0.249204	59.8188
GOTERM_BP_3	GO:0051255~spindle midzone assembly	9	10286	9	17915	1.74169	0.0519648	1	0.249204	59.8188
GOTERM_BP_3	GO:0009791~post-embryonic development	90	10286	138	17915	1.13588	0.0535809	1	0.255431	60.9732
GOTERM_BP_3	GO:0001763~morphogenesis of a branching structure	152	10286	241	17915	1.09849	0.0549931	1	0.260732	61.9564
GOTERM_BP_3	GO:0060324~face development	42	10286	60	17915	1.21918	0.0551544	1	0.260777	62.0672
GOTERM_BP_3	GO:0048608~reproductive structure development	300	10286	490	17915	1.06634	0.055215	1	0.260403	62.1087
GOTERM_BP_3	GO:0046685~response to arsenic-containing substance	21	10286	27	17915	1.35465	0.0570833	1	0.267499	63.3688
GOTERM_BP_3	GO:0009888~tissue development	1118	10286	1889	17915	1.03081	0.0581952	1	0.271418	64.0999
GOTERM_BP_3	GO:0002562~somatic diversification of immune receptors via germline recombination within a single locus	40	10286	57	17915	1.22224	0.0590617	1	0.274303	64.6601
GOTERM_BP_3	GO:0090005~negative regulation of establishment of protein localization to plasma membrane	11	10286	12	17915	1.59655	0.0591951	1	0.274199	64.7456
GOTERM_BP_3	GO:1903846~positive regulation of cellular response to transforming growth factor beta stimulus	19	10286	24	17915	1.37884	0.0593669	1	0.27425	64.8554
GOTERM_BP_3	GO:0009991~response to extracellular stimulus	283	10286	462	17915	1.06688	0.0600813	1	0.276486	65.3087
GOTERM_BP_3	GO:0001539~cilium or flagellum-dependent cell motility	17	10286	21	17915	1.40994	0.0612058	1	0.280344	66.0111
GOTERM_BP_3	GO:0003205~cardiac chamber development	118	10286	185	17915	1.11091	0.0612752	1	0.279972	66.0539
GOTERM_BP_3	GO:0044766~multi-organism transport	15	10286	18	17915	1.45141	0.0622582	1	0.283226	66.6562
GOTERM_BP_3	GO:0061383~trabecula morphogenesis	38	10286	54	17915	1.22563	0.0632723	1	0.286574	67.267
GOTERM_BP_3	GO:0035821~modification of morphology or physiology of other organism	59	10286	88	17915	1.16772	0.0646158	1	0.291181	68.0599
GOTERM_BP_3	GO:0010632~regulation of epithelial cell migration	113	10286	177	17915	1.11192	0.0647938	1	0.291213	68.1636
GOTERM_BP_3	GO:2000147~positive regulation of cell motility	282	10286	461	17915	1.06541	0.0649143	1	0.291021	68.2336
GOTERM_BP_3	GO:0048736~appendage development	125	10286	197	17915	1.10513	0.0652048	1	0.29149	68.4018
GOTERM_BP_3	GO:0009994~oocyte differentiation	36	10286	51	17915	1.22943	0.0678131	1	0.300861	69.8749
GOTERM_BP_3	GO:0009636~response to toxic substance	94	10286	146	17915	1.12136	0.0715102	1	0.314184	71.8524
GOTERM_BP_3	GO:0060348~bone development	124	10286	196	17915	1.10188	0.0730167	1	0.31912	72.6227
GOTERM_BP_3	GO:0031099~regeneration	123	10286	195	17915	1.0986	0.0815639	1	0.349608	76.6302
GOTERM_BP_3	GO:0060136~embryonic process involved in female pregnancy	8	10286	8	17915	1.74169	0.0817874	1	0.349662	76.7272
GOTERM_BP_3	GO:1900038~negative regulation of cellular response to hypoxia	8	10286	8	17915	1.74169	0.0817874	1	0.349662	76.7272
GOTERM_BP_3	GO:2000643~positive regulation of early endosome to late endosome transport	8	10286	8	17915	1.74169	0.0817874	1	0.349662	76.7272
GOTERM_BP_3	GO:0033313~meiotic cell cycle checkpoint	8	10286	8	17915	1.74169	0.0817874	1	0.349662	76.7272
GOTERM_BP_3	GO:0006458~'de novo' protein folding	16	10286	20	17915	1.39335	0.0836398	1	0.355498	77.5165
GOTERM_BP_3	GO:0060969~negative regulation of gene silencing	16	10286	20	17915	1.39335	0.0836398	1	0.355498	77.5165
GOTERM_BP_3	GO:0031641~regulation of myelination	30	10286	42	17915	1.24406	0.0837325	1	0.355076	77.5553
GOTERM_BP_3	GO:0045646~regulation of erythrocyte differentiation	30	10286	42	17915	1.24406	0.0837325	1	0.355076	77.5553
GOTERM_BP_3	GO:0045684~positive regulation of epidermis development	23	10286	31	17915	1.29222	0.0874123	1	0.367197	79.0467
GOTERM_BP_3	GO:0051491~positive regulation of filopodium assembly	23	10286	31	17915	1.29222	0.0874123	1	0.367197	79.0467
GOTERM_BP_3	GO:0040017~positive regulation of locomotion	288	10286	474	17915	1.05824	0.0876291	1	0.367186	79.1316
GOTERM_BP_3	GO:0070920~regulation of production of small RNA involved in gene silencing by RNA	10	10286	11	17915	1.58335	0.0879745	1	0.367618	79.2662
GOTERM_BP_3	GO:0090141~positive regulation of mitochondrial fission	12	10286	14	17915	1.49288	0.0886744	1	0.369267	79.5364
GOTERM_BP_3	GO:0031629~synaptic vesicle fusion to presynaptic active zone membrane	12	10286	14	17915	1.49288	0.0886744	1	0.369267	79.5364
GOTERM_BP_3	GO:0007566~embryo implantation	46	10286	68	17915	1.1782	0.0887925	1	0.368912	79.5816
GOTERM_BP_3	GO:0070482~response to oxygen levels	227	10286	371	17915	1.06567	0.0918674	1	0.378613	80.7275
GOTERM_BP_3	GO:0051702~interaction with symbiont	41	10286	60	17915	1.19015	0.0920702	1	0.378529	80.8009

## Sheet: Unmarked
Supplemental Table 5. Results from Gene Ontology (GO) analysis
Category	Term	Count	List Total	Pop Hits	Pop Total	Fold Enrichment	P-Value	Bonferroni	Benjamini	%FDR
GOTERM_BP_3	GO:0050877~neurological system process	1433	5459	2077	17915	2.26419	0	0	0	0
GOTERM_BP_3	GO:0009593~detection of chemical stimulus	299	5459	327	17915	3.00073	5.24449e-120	8.0031e-117	4.00155e-117	8.73203e-117
GOTERM_BP_3	GO:0050906~detection of stimulus involved in sensory perception	313	5459	365	17915	2.8142	4.68486e-108	7.1491e-105	2.38303e-105	7.80024e-105
GOTERM_BP_3	GO:0007165~signal transduction	2329	5459	5763	17915	1.32625	1.85623e-86	2.8326e-83	7.0815e-84	3.0906e-83
GOTERM_BP_3	GO:0007154~cell communication	2449	5459	6231	17915	1.28984	2.03517e-77	3.10567e-74	6.21134e-75	3.38854e-74
GOTERM_BP_3	GO:0006952~defense response	666	5459	1481	17915	1.47578	8.23398e-35	1.25651e-31	2.09418e-32	1.37095e-31
GOTERM_BP_3	GO:0009617~response to bacterium	323	5459	672	17915	1.57738	1.88431e-22	2.87545e-19	4.10779e-20	3.13735e-19
GOTERM_BP_3	GO:0043207~response to external biotic stimulus	442	5459	1028	17915	1.41102	1.24029e-18	1.89268e-15	2.36585e-16	2.06506e-15
GOTERM_BP_3	GO:0045087~innate immune response	296	5459	643	17915	1.51072	2.22548e-17	3.39608e-14	3.77342e-15	3.7054e-14
GOTERM_BP_3	GO:0098542~defense response to other organism	280	5459	616	17915	1.4917	2.4092e-15	3.72724e-12	3.72702e-13	4.06342e-12
GOTERM_BP_3	GO:0002250~adaptive immune response	188	5459	391	17915	1.57792	2.72862e-13	4.16434e-10	3.78577e-11	4.54359e-10
GOTERM_BP_3	GO:0002323~natural killer cell activation involved in immune response	36	5459	45	17915	2.62539	7.75196e-11	1.18295e-07	9.8579e-09	1.29069e-07
GOTERM_BP_3	GO:0006959~humoral immune response	95	5459	181	17915	1.72246	1.20745e-09	1.84257e-06	1.41736e-07	2.0104e-06
GOTERM_BP_3	GO:0030595~leukocyte chemotaxis	101	5459	196	17915	1.6911	1.28189e-09	1.95616e-06	1.39726e-07	2.13433e-06
GOTERM_BP_3	GO:0097529~myeloid leukocyte migration	85	5459	163	17915	1.71134	1.44061e-08	2.19834e-05	1.46558e-06	2.3986e-05
GOTERM_BP_3	GO:0071216~cellular response to biotic stimulus	124	5459	265	17915	1.53561	2.89241e-08	4.41371e-05	2.75863e-06	4.81582e-05
GOTERM_BP_3	GO:0002286~T cell activation involved in immune response	61	5459	110	17915	1.81987	1.21639e-07	0.000185603	1.09188e-05	0.000202527
GOTERM_BP_3	GO:0009812~flavonoid metabolic process	22	5459	26	17915	2.77685	1.67591e-07	0.000255712	1.42079e-05	0.000279038
GOTERM_BP_3	GO:0070661~leukocyte proliferation	139	5459	314	17915	1.45274	2.56989e-07	0.000392088	2.064e-05	0.000427883
GOTERM_BP_3	GO:0072676~lymphocyte migration	48	5459	84	17915	1.87528	1.04156e-06	0.00158816	7.94677e-05	0.00173417
GOTERM_BP_3	GO:0031424~keratinization	29	5459	42	17915	2.26596	1.4065e-06	0.00214402	0.000102201	0.00234179
GOTERM_BP_3	GO:0070489~T cell aggregation	188	5459	464	17915	1.32967	3.2807e-06	0.00499385	0.000227536	0.0054622
GOTERM_BP_3	GO:0050776~regulation of immune response	242	5459	620	17915	1.28094	3.51715e-06	0.00535281	0.000233329	0.00585586
GOTERM_BP_3	GO:0002366~leukocyte activation involved in immune response	108	5459	242	17915	1.46458	3.90571e-06	0.0059424	0.000248308	0.00650278
GOTERM_BP_3	GO:0002263~cell activation involved in immune response	108	5459	244	17915	1.45257	6.1438e-06	0.00933166	0.000374949	0.0102289
GOTERM_BP_3	GO:0007586~digestion	65	5459	131	17915	1.62834	7.47384e-06	0.0113403	0.000438563	0.0124431
GOTERM_BP_3	GO:0017144~drug metabolic process	19	5459	25	17915	2.49412	2.2585e-05	0.033878	0.00127567	0.0375972
GOTERM_BP_3	GO:0002274~myeloid leukocyte activation	76	5459	164	17915	1.5208	2.58226e-05	0.0386395	0.00140636	0.0429857
GOTERM_BP_3	GO:0001816~cytokine production	235	5459	616	17915	1.25196	3.03264e-05	0.0452242	0.00159455	0.0504811
GOTERM_BP_3	GO:0002285~lymphocyte activation involved in immune response	79	5459	174	17915	1.48998	4.25046e-05	0.0628046	0.00215978	0.0707463
GOTERM_BP_3	GO:0001819~positive regulation of cytokine production	149	5459	371	17915	1.318	6.05487e-05	0.0882597	0.00297621	0.100765
GOTERM_BP_3	GO:0050777~negative regulation of immune response	61	5459	128	17915	1.56395	6.68009e-05	0.0969177	0.0031806	0.111165
GOTERM_BP_3	GO:0001817~regulation of cytokine production	215	5459	564	17915	1.25102	7.07996e-05	0.102412	0.00326871	0.117815
GOTERM_BP_3	GO:0032103~positive regulation of response to external stimulus	113	5459	270	17915	1.37347	7.24118e-05	0.104618	0.00324485	0.120497
GOTERM_BP_3	GO:0001775~cell activation	336	5459	926	17915	1.19078	7.59596e-05	0.109452	0.00330648	0.126397
GOTERM_BP_3	GO:0002684~positive regulation of immune system process	285	5459	782	17915	1.19603	0.000195779	0.258283	0.00826532	0.325471
GOTERM_BP_3	GO:0009620~response to fungus	24	5459	39	17915	2.01953	0.000207048	0.270932	0.00850387	0.344176
GOTERM_BP_3	GO:0031349~positive regulation of defense response	114	5459	279	17915	1.34092	0.000212758	0.277258	0.0085084	0.35365
GOTERM_BP_3	GO:0002443~leukocyte mediated immunity	132	5459	334	17915	1.29697	0.000361818	0.424338	0.0140601	0.600722
GOTERM_BP_3	GO:0034754~cellular hormone metabolic process	42	5459	85	17915	1.62156	0.000431992	0.482819	0.0163489	0.716837
GOTERM_BP_3	GO:0050778~positive regulation of immune response	179	5459	474	17915	1.23931	0.000498074	0.532451	0.0183718	0.826064
GOTERM_BP_3	GO:0006805~xenobiotic metabolic process	27	5459	48	17915	1.84598	0.000525369	0.551535	0.0189123	0.871148
GOTERM_BP_3	GO:0002683~negative regulation of immune system process	155	5459	404	17915	1.25908	0.000543647	0.563877	0.0191134	0.901326
GOTERM_BP_3	GO:0046649~lymphocyte activation	247	5459	683	17915	1.18681	0.000871514	0.735658	0.0297863	1.44121
GOTERM_BP_3	GO:0002437~inflammatory response to antigenic stimulus	32	5459	62	17915	1.6938	0.000985359	0.777849	0.0328785	1.62802
GOTERM_BP_3	GO:0001562~response to protozoan	20	5459	34	17915	1.93043	0.0017915	0.935189	0.0577498	2.94138
GOTERM_BP_3	GO:0071674~mononuclear cell migration	17	5459	27	17915	2.06628	0.00179386	0.935423	0.0566289	2.9452
GOTERM_BP_3	GO:0030193~regulation of blood coagulation	40	5459	85	17915	1.54435	0.00193753	0.948157	0.0597947	3.17752
GOTERM_BP_3	GO:0010876~lipid localization	132	5459	348	17915	1.2448	0.00230909	0.970629	0.0694642	3.77592
GOTERM_BP_3	GO:0002685~regulation of leukocyte migration	71	5459	172	17915	1.35467	0.00268004	0.983348	0.0786401	4.36987
GOTERM_BP_3	GO:0002687~positive regulation of leukocyte migration	56	5459	130	17915	1.41367	0.00272454	0.984444	0.0783905	4.44089
GOTERM_BP_3	GO:0050818~regulation of coagulation	41	5459	89	17915	1.51181	0.0027294	0.984559	0.0770745	4.44864
GOTERM_BP_3	GO:0002695~negative regulation of leukocyte activation	63	5459	151	17915	1.3692	0.00356358	0.995694	0.0976813	5.77072
GOTERM_BP_3	GO:0002523~leukocyte migration involved in inflammatory response	12	5459	17	17915	2.31652	0.00368717	0.996437	0.0991253	5.96512
GOTERM_BP_3	GO:0042267~natural killer cell mediated cytotoxicity	28	5459	56	17915	1.64087	0.00394204	0.997588	0.103798	6.36485
GOTERM_BP_3	GO:0019730~antimicrobial humoral response	24	5459	46	17915	1.71221	0.0042735	0.998549	0.11015	6.88229
GOTERM_BP_3	GO:0031348~negative regulation of defense response	66	5459	161	17915	1.34531	0.00462626	0.999155	0.116745	7.43003
GOTERM_BP_3	GO:0019748~secondary metabolic process	27	5459	54	17915	1.64087	0.00473452	0.999284	0.117382	7.59753
GOTERM_BP_3	GO:0002418~immune response to tumor cell	14	5459	22	17915	2.08838	0.00499181	0.999518	0.121407	7.99445
GOTERM_BP_3	GO:0008207~C21-steroid hormone metabolic process	14	5459	22	17915	2.08838	0.00499181	0.999518	0.121407	7.99445
GOTERM_BP_3	GO:0016337~single organismal cell-cell adhesion	258	5459	738	17915	1.14727	0.00517032	0.999633	0.123518	8.26889
GOTERM_BP_3	GO:0001910~regulation of leukocyte mediated cytotoxicity	31	5459	65	17915	1.56514	0.00550602	0.999781	0.129007	8.78291
GOTERM_BP_3	GO:0001911~negative regulation of leukocyte mediated cytotoxicity	13	5459	20	17915	2.13313	0.00587611	0.999876	0.135025	9.34646
GOTERM_BP_3	GO:0002698~negative regulation of immune effector process	47	5459	109	17915	1.41506	0.00610142	0.999912	0.137778	9.68795
GOTERM_BP_3	GO:0002347~response to tumor cell	15	5459	25	17915	1.96904	0.00693652	0.999976	0.152927	10.9431
GOTERM_BP_3	GO:0030194~positive regulation of blood coagulation	15	5459	25	17915	1.96904	0.00693652	0.999976	0.152927	10.9431
GOTERM_BP_3	GO:1900048~positive regulation of hemostasis	15	5459	25	17915	1.96904	0.00693652	0.999976	0.152927	10.9431
GOTERM_BP_3	GO:0002699~positive regulation of immune effector process	73	5459	184	17915	1.30199	0.00731381	0.999986	0.158304	11.5048
GOTERM_BP_3	GO:0031343~positive regulation of cell killing	26	5459	53	17915	1.60991	0.00769875	0.999992	0.163637	12.0744
GOTERM_BP_3	GO:0030317~sperm motility	36	5459	80	17915	1.47678	0.00811211	0.999996	0.169324	12.6823
GOTERM_BP_3	GO:0002504~antigen processing and presentation of peptide or polysaccharide antigen via MHC class II	14	5459	23	17915	1.99758	0.00830774	0.999997	0.170734	12.9686
GOTERM_BP_3	GO:0031342~negative regulation of cell killing	14	5459	23	17915	1.99758	0.00830774	0.999997	0.170734	12.9686
GOTERM_BP_3	GO:0002694~regulation of leukocyte activation	171	5459	478	17915	1.17401	0.00870678	0.999998	0.175849	13.5498
GOTERM_BP_3	GO:0050820~positive regulation of coagulation	16	5459	28	17915	1.87528	0.00899733	0.999999	0.178834	13.9707
GOTERM_BP_3	GO:0044364~disruption of cells of other organism	13	5459	21	17915	2.03155	0.0099439	1	0.193292	15.3287
GOTERM_BP_3	GO:0002420~natural killer cell mediated cytotoxicity directed against tumor cell target	8	5459	10	17915	2.62539	0.011587	1	0.21887	17.6382
GOTERM_BP_3	GO:0048002~antigen processing and presentation of peptide antigen	39	5459	90	17915	1.42209	0.0118104	1	0.219917	17.9476
GOTERM_BP_3	GO:0009410~response to xenobiotic stimulus	28	5459	60	17915	1.53148	0.0122223	1	0.223996	18.5153
GOTERM_BP_3	GO:0048240~sperm capacitation	16	5459	29	17915	1.81061	0.0134605	1	0.240986	20.1993
GOTERM_BP_3	GO:0002532~production of molecular mediator involved in inflammatory response	24	5459	50	17915	1.57523	0.0147476	1	0.257937	21.9152
GOTERM_BP_3	GO:0032101~regulation of response to external stimulus	263	5459	769	17915	1.12236	0.0149889	1	0.258665	22.233
GOTERM_BP_3	GO:0071391~cellular response to estrogen stimulus	19	5459	37	17915	1.68522	0.0153257	1	0.260777	22.6746
GOTERM_BP_3	GO:0022409~positive regulation of cell-cell adhesion	81	5459	213	17915	1.24798	0.015526	1	0.260854	22.936
GOTERM_BP_3	GO:0061179~negative regulation of insulin secretion involved in cellular response to glucose stimulus	13	5459	22	17915	1.93921	0.0158864	1	0.26322	23.4044
GOTERM_BP_3	GO:0050865~regulation of cell activation	181	5459	516	17915	1.15115	0.0160235	1	0.262375	23.5819
GOTERM_BP_3	GO:1900047~negative regulation of hemostasis	22	5459	45	17915	1.6044	0.0160704	1	0.260289	23.6425
GOTERM_BP_3	GO:0030195~negative regulation of blood coagulation	22	5459	45	17915	1.6044	0.0160704	1	0.260289	23.6425
GOTERM_BP_3	GO:0045475~locomotor rhythm	15	5459	27	17915	1.82319	0.0163294	1	0.261182	23.9765
GOTERM_BP_3	GO:0022600~digestive system process	41	5459	98	17915	1.37297	0.01868	1	0.290051	26.9453
GOTERM_BP_3	GO:0050817~coagulation	75	5459	197	17915	1.24939	0.0192584	1	0.294689	27.6589
GOTERM_BP_3	GO:0010883~regulation of lipid storage	24	5459	51	17915	1.54435	0.0192667	1	0.291927	27.6691
GOTERM_BP_3	GO:0001912~positive regulation of leukocyte mediated cytotoxicity	22	5459	46	17915	1.56953	0.0212468	1	0.313871	30.0626
GOTERM_BP_3	GO:0050866~negative regulation of cell activation	65	5459	169	17915	1.26221	0.0233597	1	0.336273	32.5343
GOTERM_BP_3	GO:0022407~regulation of cell-cell adhesion	135	5459	380	17915	1.16588	0.0239482	1	0.340065	33.208
GOTERM_BP_3	GO:0048512~circadian behavior	29	5459	66	17915	1.44198	0.0261492	1	0.361909	35.672
GOTERM_BP_3	GO:0051238~sequestering of metal ion	50	5459	126	17915	1.30228	0.02654	1	0.363052	36.1005
GOTERM_BP_3	GO:0050819~negative regulation of coagulation	22	5459	47	17915	1.53613	0.0276184	1	0.371582	37.2689
GOTERM_BP_3	GO:0045123~cellular extravasation	22	5459	47	17915	1.53613	0.0276184	1	0.371582	37.2689
GOTERM_BP_3	GO:0010888~negative regulation of lipid storage	14	5459	26	17915	1.76709	0.0288193	1	0.381113	38.5464
GOTERM_BP_3	GO:0048871~multicellular organismal homeostasis	121	5459	340	17915	1.16791	0.0303311	1	0.393481	40.12
GOTERM_BP_3	GO:0002251~organ or tissue specific immune response	17	5459	34	17915	1.64087	0.0307113	1	0.394109	40.5097
GOTERM_BP_3	GO:0072378~blood coagulation, fibrin clot formation	6	5459	7	17915	2.81292	0.0307592	1	0.391417	40.5587
GOTERM_BP_3	GO:0009595~detection of biotic stimulus	13	5459	24	17915	1.77761	0.035177	1	0.430714	44.9123
GOTERM_BP_3	GO:0050879~multicellular organismal movement	23	5459	51	17915	1.48	0.0374376	1	0.447968	47.0224
GOTERM_BP_3	GO:0014850~response to muscle activity	14	5459	27	17915	1.70164	0.040417	1	0.470559	49.6875
GOTERM_BP_3	GO:0098856~intestinal lipid absorption	8	5459	12	17915	2.18782	0.0418094	1	0.478858	50.8893
GOTERM_BP_3	GO:0034369~plasma lipoprotein particle remodeling	12	5459	22	17915	1.79004	0.043045	1	0.485611	51.9331
GOTERM_BP_3	GO:0098602~single organism cell adhesion	265	5459	796	17915	1.09254	0.047916	1	0.520305	55.8485
GOTERM_BP_3	GO:0002757~immune response-activating signal transduction	95	5459	266	17915	1.17205	0.0485942	1	0.521945	56.3692
GOTERM_BP_3	GO:0044116~growth of symbiont involved in interaction with host	13	5459	25	17915	1.7065	0.0493326	1	0.523994	56.9296
GOTERM_BP_3	GO:0002507~tolerance induction	13	5459	25	17915	1.7065	0.0493326	1	0.523994	56.9296
GOTERM_BP_3	GO:0002367~cytokine production involved in immune response	31	5459	75	17915	1.35645	0.0496735	1	0.52311	57.1861
GOTERM_BP_3	GO:0009582~detection of abiotic stimulus	46	5459	119	17915	1.26857	0.0516713	1	0.534098	58.6603
GOTERM_BP_3	GO:0043114~regulation of vascular permeability	14	5459	28	17915	1.64087	0.0549384	1	0.553296	60.9687
GOTERM_BP_3	GO:0010817~regulation of hormone levels	173	5459	509	17915	1.1154	0.0552225	1	0.551858	61.1636
GOTERM_BP_3	GO:0001818~negative regulation of cytokine production	77	5459	213	17915	1.18636	0.0575559	1	0.563908	62.7301
GOTERM_BP_3	GO:0009581~detection of external stimulus	46	5459	120	17915	1.258	0.0589332	1	0.56943	63.6267
GOTERM_BP_3	GO:0036336~dendritic cell migration	12	5459	23	17915	1.71221	0.0603617	1	0.575116	64.5351
GOTERM_BP_3	GO:0060046~regulation of acrosome reaction	10	5459	18	17915	1.82319	0.0650639	1	0.600144	67.3771
GOTERM_BP_3	GO:0050886~endocrine process	40	5459	103	17915	1.27446	0.0651508	1	0.597393	67.4276
GOTERM_BP_3	GO:0044036~cell wall macromolecule metabolic process	8	5459	13	17915	2.01953	0.0672347	1	0.606111	68.6156
GOTERM_BP_3	GO:0002281~macrophage activation involved in immune response	8	5459	13	17915	2.01953	0.0672347	1	0.606111	68.6156
GOTERM_BP_3	GO:0045913~positive regulation of carbohydrate metabolic process	37	5459	95	17915	1.27815	0.0733118	1	0.635898	71.852
GOTERM_BP_3	GO:0002292~T cell differentiation involved in immune response	25	5459	60	17915	1.36739	0.0735691	1	0.634052	71.9818
GOTERM_BP_3	GO:0002775~antimicrobial peptide production	5	5459	6	17915	2.73478	0.0741978	1	0.634148	72.2967
GOTERM_BP_3	GO:0006956~complement activation	29	5459	72	17915	1.32181	0.0787688	1	0.653895	74.4882
GOTERM_BP_3	GO:0032102~negative regulation of response to external stimulus	96	5459	275	17915	1.14562	0.0796263	1	0.654941	74.8807
GOTERM_BP_3	GO:1900424~regulation of defense response to bacterium	9	5459	16	17915	1.84598	0.0804776	1	0.65594	75.2648
GOTERM_BP_3	GO:0098543~detection of other organism	9	5459	16	17915	1.84598	0.0804776	1	0.65594	75.2648
GOTERM_BP_3	GO:0044872~lipoprotein localization	9	5459	16	17915	1.84598	0.0804776	1	0.65594	75.2648
GOTERM_BP_3	GO:0050921~positive regulation of chemotaxis	49	5459	132	17915	1.21822	0.08487	1	0.673234	77.1602
GOTERM_BP_3	GO:0032845~negative regulation of homeostatic process	71	5459	199	17915	1.17087	0.085916	1	0.674908	77.591
GOTERM_BP_3	GO:0051919~positive regulation of fibrinolysis	4	5459	4	17915	3.28174	0.0872432	1	0.677786	78.1266
GOTERM_BP_3	GO:0060474~positive regulation of sperm motility involved in capacitation	4	5459	4	17915	3.28174	0.0872432	1	0.677786	78.1266
GOTERM_BP_3	GO:0002577~regulation of antigen processing and presentation	13	5459	27	17915	1.5801	0.0881141	1	0.678627	78.4715
GOTERM_BP_3	GO:0045834~positive regulation of lipid metabolic process	57	5459	157	17915	1.19146	0.0921157	1	0.692648	79.9916
GOTERM_BP_3	GO:0050878~regulation of body fluid levels	119	5459	349	17915	1.11899	0.0955322	1	0.703604	81.209
GOTERM_BP_3	GO:0042446~hormone biosynthetic process	22	5459	53	17915	1.36223	0.0984762	1	0.712249	82.2019
