# Supplementary material for: Decoding the function of bivalent chromatin in development and cancer
Source: HighWire-hosted journal article supplement (doi:10.1101/gr.275736.121), 2021-10-19
Supplement: Supplemental_Table_S6.xlsx [file Supplemental_Table_S6.xlsx]

## Sheet: Gene Expr in Various Cell Types
Supplemental Table 6. Correlation between number of bivalent genes and gene expression
		ESCs (H1)	ESCs (HUES64)	Brain Germinal Matrix	Penis Foreskin 01 Fibroblast	Penis Foreskin 02 Fibroblast	HSCs	Fetal Small Intestine	Fetal Large Intestine	Embryonic Kidney (NHEKs)	Foreskin Melanocyte	Blood (PBMCs)	Mammary Epithelial Cells (HMECs)	Breast Myoepithelial Cells	Lung Fibroblasts (NHLFs)	HUVECs	Pancreatic Islets	Esophagus	Heart (Left Ventricle)	Gastric	Pancreas
	#Bivalent Genes	4331	5139	6774	4046	3728	3527	3257	2767	2770	2246	2325	1643	1767	1566	940	0	0	0	0	0
ENSEMBL Gene Accession	Gene Symbol	ESCs (H1)	ESCs (HUES64)	Brain Germinal Matrix	Penis Foreskin 01 Fibroblast	Penis Foreskin 02 Fibroblast	HSCs	Fetal Small Intestine	Fetal Large Intestine	Embryonic Kidney (NHEKs)	Foreskin Melanocyte	Blood (PBMCs)	Mammary Epithelial Cells (HMECs)	Breast Myoepithelial Cells	Lung Fibroblasts (NHLFs)	HUVECs	Pancreatic Islets	Esophagus	Heart (Left Ventricle)	Gastric	Pancreas	Correlation with #Bivalent Genes
ENSG00000106462	EZH2	21.1	30.426	41.272	10.21	11.504	18.851	7.487	9.029	6.651	7.137	6.066	11.167	4.817	8.194	10.514	1.078	7.233	1.126	3.829	4.545	0.842775
ENSG00000131470	PSMC3IP	15.334	16.869	23.707	14.568	22.095	9.947	10.459	12.467	4.394	8.972	10.572	11.167	2.953	8.505	3.227	1.491	6.713	2.472	8.024	5.554	0.834
ENSG00000187951	ARHGAP11B	7.403	9.957	10.099	8.73	6.153	6.783	4.791	4.335	3.203	3.337	3.068	5.572	0.185	4.22	3.13	0.399	2.459	0.322	5.304	1.799	0.833265
ENSG00000137812	CASC5	6.368	8.371	6.707	4.677	3.803	1.653	3.447	3.677	2.539	1.459	0.531	4.659	0.066	4.006	2.172	0.045	0.832	0.044	0.529	0.083	0.814265
ENSG00000145375	SPATA5	4.225	4.165	3.481	2.673	2.645	3.994	2.71	2.564	2.529	2.048	3.035	2.998	2.81	1.914	1.117	1.839	1.104	1.892	1.621	1.319	0.809956
ENSG00000068796	KIF2A	29.057	36.911	50.829	15.691	9.001	40.517	14.312	15.336	16.096	5.52	24.508	12.948	8.053	17.522	8.726	11.645	4.85	4.769	6.689	3.134	0.807978
ENSG00000116127	ALMS1	10.574	12.277	15.569	4.094	4.19	8.64	6.431	6.07	2.59	0.938	6.589	3.643	1.946	3.724	2.326	5.277	2.101	1.616	1.544	3.232	0.803472
ENSG00000109685	WHSC1	9.903	19.005	21.335	19.106	16.818	12.049	9.472	9.861	4.122	6.126	6.008	8.085	1.633	8.133	9.738	3.648	5.052	4.776	5.129	7.411	0.802215
ENSG00000144354	CDCA7	42.6	44.293	90.218	6.215	14.218	52.278	41.64	33.378	13.306	6.871	2.275	21.299	0.28	6.794	9.101	0.503	10.743	0.336	1.756	0.307	0.801685
ENSG00000100629	CEP128	1.694	2.477	2.614	1.341	1.348	2.185	0.629	0.667	0.89	0.468	1.309	1.446	0.165	0.777	0.358	0.35	0.724	0.604	0.774	0.432	0.795512
ENSG00000136108	CKAP2	23.768	50.601	28.754	17.688	9.299	34.245	13.042	13.518	15.174	6.123	8.17	11.668	2.401	11.583	6.421	4.092	3.919	2.121	2.707	0.749	0.791942
ENSG00000137804	NUSAP1	61.924	61.671	86.268	25.329	21.716	10.111	15.078	16.422	14.654	21.592	2.502	36.668	1.519	25.257	20.184	0.538	8.23	0.384	8.011	0.807	0.790395
ENSG00000151746	BICD1	4.95	5.78	10.376	2.953	3.041	5.052	3.551	3.715	1.706	1.28	1.552	1.988	4.843	2.448	2.446	3.12	1.266	1.812	0.796	1.125	0.789502
ENSG00000148773	MKI67	42.067	30.161	55.692	39.74	52.541	2.304	18.163	16.267	7.322	6.684	2.39	21.423	0.025	11.979	15.305	0.131	5.722	0.1	1.968	0.172	0.787613
ENSG00000156509	FBXO43	0.854	0.675	0.823	0.901	0.494	0.355	0.253	0.333	0.081	0.361	0.113	0.144	0.007	0.208	0.494	0.041	0.137	0.006	0.033	0.181	0.786254
ENSG00000145996	CDKAL1	9.219	12.065	12.175	6.15	5.636	10.841	6.552	6.202	5.026	3.715	6.679	4.281	6.445	6.353	5.815	5.51	4.01	4.309	5.383	4.124	0.785045
ENSG00000147140	NONO	199.8	204.195	147.433	112.171	138.353	149.811	100.021	95.071	68.067	72.757	99.907	64.937	90.16	68.471	110.224	86.194	54.656	41.857	76.373	53.937	0.781298
ENSG00000181827	RFX7	15.035	20.144	31.188	7.449	6.678	27.973	9.418	10.585	12.623	4.769	15.882	6.628	5.131	4.235	5.289	8.681	3.817	2.03	2.31	3.322	0.775522
ENSG00000166582	CENPV	76.022	112.707	153.125	14.171	20.036	13.277	38.259	39.613	0.513	5.531	9.441	3.355	5.444	10.283	14.973	4.69	3.562	5.231	15.585	7.848	0.774768
ENSG00000102974	CTCF	30.656	46.662	41.614	27.678	18.231	33.325	26.025	24.777	20.165	15.211	27.427	21.48	28.069	19.488	17.776	23.94	19.473	13.025	20.889	14.286	0.7708
ENSG00000163939	PBRM1	14.723	22.802	25.718	12.514	7.873	18.102	13.79	15.028	11.642	6.875	13.765	9.39	9.27	14.914	7.647	13.514	8.788	7.73	7.193	6.372	0.766405
ENSG00000164663	USP49	3.937	4.597	7.022	1.155	0.614	3.34	1.263	1.755	1.302	0.471	3.259	0.753	1.005	0.594	1.63	0.895	0.848	0.575	0.376	1.038	0.765536
ENSG00000155966	AFF2	1.329	2.386	2.617	0.037	0.114	1.23	0.44	0.621	0.008	0.083	0.395	0.072	0.074	0.047	0.007	0.333	0.08	0.017	0.009	0.116	0.76394
ENSG00000113360	DROSHA	26.884	23.053	23.391	16.694	15.008	20.32	12.099	12.176	13.309	8.8	8.484	17.082	9.036	15.869	15.751	11.856	7.568	8.872	6.632	9.355	0.763041
ENSG00000100823	APEX1	203.629	198.574	224.749	166.41	137.209	236.16	89.35	88.358	116.818	111.863	60.447	129.644	66.816	107.961	170.528	73.695	60.101	47.225	93.451	53.967	0.761217
ENSG00000122824	NUDT10	12.019	17.518	29.769	2.216	1.708	7.983	0.946	2.733	0.626	5.084	0.319	3.45	3.271	1.782	0.316	0.57	2.104	0.18	2.728	0.383	0.757066
ENSG00000196368	NUDT11	20.497	24.803	43.871	4.755	5.322	15.08	1.019	3.493	13.911	6.803	1.407	13.455	8.562	11.402	3.945	2.792	2.258	0.124	1.759	3.873	0.756291
ENSG00000074047	GLI2	9.015	14.108	25.718	8.393	20.386	0.02	1.592	2.213	0.039	0.468	0	0.007	0.108	1.847	0.007	0.542	1.719	0.488	1.079	0.392	0.756025
ENSG00000117632	STMN1	79.099	108.244	331.556	46.766	60.176	76.909	30.511	46.03	13.742	49.149	4.524	16.396	16.856	30.736	19.834	10.463	19.037	9.41	34.754	5.51	0.755693
ENSG00000177917	ARL6IP6	17.829	22.186	26.346	9.525	15.061	16.557	8.106	8.537	12.515	5.997	7.528	11.768	9.037	13.24	21.072	4.797	5.016	2.931	5.7	2.91	0.753506
ENSG00000155592	ZKSCAN2	4.186	6.133	5.115	2.49	1.591	3.275	3.362	3.499	1.662	0.992	2.667	1.48	2.352	1.605	1.242	2.772	1.15	1.843	1.356	1.364	0.752052
ENSG00000066117	SMARCD1	42.032	63.036	71.547	29.269	29.808	31.511	16.313	18.076	26.042	51.113	30.539	32.319	29.046	13.678	45.203	18.806	9.273	7.264	12.546	11.039	0.747665
ENSG00000151849	CENPJ	16.401	16.352	13.368	3.754	3.847	12.234	5.706	7.005	2.115	0.503	1.942	1.375	1.592	1.362	1.897	1.144	3.913	1.901	2.005	1.827	0.747197
ENSG00000071564	TCF3	88.293	86.063	95.417	49.073	63.977	32.989	22.611	24.349	18.58	40.912	20.642	32.686	15.495	13.36	67.444	9.006	15.928	12.762	22.384	25.641	0.746177
ENSG00000169925	BRD3	28.175	26.787	35.737	12.256	11.739	10.987	12.067	11.625	3.21	14.565	11.285	4.971	5.876	4.952	6.623	11.638	8.511	7.07	8.379	10.072	0.746173
ENSG00000088325	TPX2	82.649	83.8	63.33	84.221	62.36	13.6	14.542	14.257	22.461	27.027	1.39	52.832	0.27	36.189	22.153	0.187	7.079	0.637	5.178	0.178	0.743138
ENSG00000175322	ZNF519	3.787	2.59	3.809	0.321	0.609	1.481	1.219	1.358	0.36	0.307	0.413	0.308	0.316	0.26	0.33	0.378	1.065	0.208	0.076	0.283	0.743011
ENSG00000163808	KIF15	13.484	22.044	13.692	4.675	3.203	2.16	4.506	4.092	1.478	0.64	0.271	3.092	0.105	3.777	1.967	0.096	1.464	0.149	1.528	0.196	0.74253
ENSG00000164076	CAMKV	21.244	24.616	26.146	0	0.005	0.363	11.47	7.567	0.005	0.006	0	0.019	0.055	0.009	0	0.164	0.007	0.002	0.033	0.04	0.741947
ENSG00000107341	UBE2R2	39.565	44.509	66.883	37.966	40.887	38.097	34.157	34.095	23.944	46.776	41.323	22.832	31.586	43.462	24.061	35.828	25.639	26.428	26.495	26.555	0.741127
ENSG00000110395	CBL	15.117	17.699	22.257	14.973	10.057	13.245	6.13	7.492	12.058	9.353	21.426	12.954	7.262	11.93	15.759	4.264	3.703	3.879	2.902	1.322	0.738992
ENSG00000164104	HMGB2	50.917	102.771	188.476	80.734	43.87	96.172	46.385	43.43	13.167	19.55	52.344	29.455	33.856	51.346	17.232	9.603	71.92	21.26	39.464	15.895	0.738944
ENSG00000129351	ILF3	113.922	145.947	123.786	72.01	92.248	97.421	55.014	62.166	49.271	57.395	90.999	56.05	77.849	41.169	76.306	37.138	57.585	40.386	40.273	84.694	0.738458
ENSG00000156531	PHF6	14.978	23.361	16.887	5.667	2.943	17.392	7.75	8.235	8.604	2.378	2.528	4.436	2.595	5.88	2.721	3.587	3.915	3.22	4.37	2.679	0.738139
ENSG00000187987	ZSCAN23	1.05	1.849	3.944	0.757	0.453	2.181	1.423	1.493	1.096	0.047	0.069	0.475	0.382	0.615	0.388	0.71	0.541	0.367	0.197	0.507	0.737942
ENSG00000000460	C1orf112	6.649	7.551	4.716	2.896	3.246	6.91	3.58	3.408	3.29	2.782	2.292	4.646	1.04	2.491	4.099	0.806	1.487	0.47	1.25	1.126	0.737057
ENSG00000154928	EPHB1	3.783	3.175	9.227	0.857	2.378	0.042	0.13	1.179	0.012	0.055	0.457	0.013	1.879	0.148	0.886	0.124	0.211	0.225	0.033	0.127	0.736361
ENSG00000226174	TEX22	4.174	7.279	15.579	6.963	4.55	6.131	3.279	3.271	2.313	6.332	3.859	3.046	3.068	1.55	3.547	3.142	2.357	1.448	1.843	5.58	0.734475
ENSG00000147274	RBMX	167.899	207.251	130.005	91.176	73.275	191.315	80.718	80.888	53.49	32.286	80.184	62.716	77.021	70.415	43.781	50.974	44.579	28.79	58.862	40.774	0.734234
ENSG00000146263	MMS22L	4.459	3.589	2.38	1.434	1.816	2.896	2.426	2.085	1.519	0.788	1.092	2.233	0.182	2.008	1.256	0.627	0.742	0.304	0.43	0.413	0.732368
ENSG00000141391	SLMO1	4.296	4.489	8.959	9.53	4.094	8.068	2.39	3.581	3.769	1.018	0.258	2.631	2.406	3.226	3.886	1.123	1.676	1.061	1.879	1.163	0.731697
ENSG00000103449	SALL1	26.845	59.151	69.935	4.765	6.75	0.001	2.845	2.573	0.011	0.007	0	0.536	0.178	0.098	0.01	0.863	1.528	0.088	4.172	1.191	0.7315
ENSG00000167771	RCOR2	38.2	49.916	91.659	7.647	3.717	0.531	3.254	3.879	0.448	1.949	0.06	0.083	0.08	2.225	0.551	3.419	0.875	4.072	1.855	1.88	0.730469
ENSG00000184445	KNTC1	11.635	16.096	6.878	4.898	4.746	10.829	6.386	6.088	3.802	1.873	5.033	5.395	0.671	4.653	3.885	0.853	3.023	0.599	0.842	1.376	0.730393
ENSG00000183337	BCOR	16.78	18.224	29.552	6.004	12.971	13.928	15.378	13.679	1.565	7.872	6.741	0.946	6.522	1.123	3.863	11.688	7.506	6.463	3.476	5.348	0.730065
ENSG00000081913	PHLPP1	20.335	16.238	25.547	5.016	8.001	6.249	8.296	7.738	6.249	15.407	3.548	8.042	10.864	3.974	4.313	6.942	5.556	2.05	3.309	5.054	0.730037
ENSG00000150394	CDH8	1.91	1.966	4.07	0	0.03	0	0.207	0.665	0.068	0	0.009	0.061	0.11	0	0.002	0.016	0.081	0.013	0.013	0.005	0.729962
ENSG00000083842	ZNF8	8.673	7.309	12.623	3.912	3.773	7.586	2.981	3.321	2.981	2.592	8.513	3.148	2.826	2.188	2.919	4.323	2.099	2.658	1.695	3.494	0.729895
ENSG00000159784	FAM131B	7.679	9.454	19.646	1.19	0.586	0.319	1.01	2.537	0.096	0.018	0.353	0.345	0.259	1.735	1.026	0.085	0.865	0.104	0.602	0.065	0.729532
ENSG00000162613	FUBP1	56.097	58.803	64.938	23.184	26.056	62.947	45.011	49.471	37.948	8.893	33.942	32.978	49.763	30.14	33.563	29.207	12.097	14.857	16.262	12.619	0.729021
ENSG00000103742	IGDCC4	2.752	8.323	16.538	2.293	1.958	0.007	3.758	3.953	0.025	0.029	0.06	0.024	0.048	0.458	0.055	0.227	1.748	0.208	1.017	0.407	0.728746
ENSG00000187801	ZNF643	2.972	5.661	5.528	2.455	1.088	1.661	1.637	1.671	1.345	0.289	1.285	2.804	0.681	2.228	0.706	1.47	0.619	0.94	1.055	1.46	0.728063
ENSG00000177732	SOX12	33.769	37.681	47.858	32.109	28.512	15.064	7.066	8.963	2.468	45.473	5.352	2.27	2.235	3.781	6.839	10.979	5.916	6.587	4.392	5.187	0.726994
ENSG00000135973	GPR45	0.135	0.294	0.474	0	0.006	0.095	0.062	0.089	0	0.029	0.026	0	0.008	0.007	0	0	0.008	0	0	0.091	0.725892
ENSG00000101126	ADNP	33.724	53.449	36.366	32.78	16.52	39.865	32.363	34.18	19.683	12.6	29.982	15.179	27.363	15.985	12.84	24.077	19.211	12.147	15.184	13.518	0.725631
ENSG00000064419	TNPO3	44.545	58.908	39.712	42.679	21.735	27.645	21.712	20.176	34.514	19.156	23.551	35.47	17.24	33.967	28.01	12.152	14.858	20.694	18.362	8.347	0.724115
ENSG00000196591	HDAC2	24.262	37.601	32.684	7.762	5.152	17.238	9.967	11.067	11.217	3.776	3.539	9.16	12.04	11.153	5.971	7.712	6.419	5.76	9.754	5.343	0.72229
ENSG00000153707	PTPRD	12.231	13.648	22.555	2.919	0.642	2.491	1.497	3.451	0.122	0.007	0.01	0.005	0.044	0.531	2.171	3.329	1.286	1.083	0.223	1.267	0.721588
ENSG00000004487	KDM1A	113.835	128.811	95.734	26.449	29.128	65.726	43.727	44.431	60.917	27.202	24.398	56.346	29.5	42.111	51.386	30.055	21.415	18.355	22.936	18.59	0.719755
ENSG00000103194	USP10	75.989	82.273	48.337	45.583	41.117	39.83	35.63	35.908	38.331	29.903	28.416	45.98	45.838	38.646	32.185	31.436	22.653	28.163	22.244	13.425	0.718945
ENSG00000145248	SLC10A4	4.981	3.169	6.084	0.255	0.069	1.124	0.12	1.328	0.026	0	0.025	0.012	0.067	0.032	0.109	0.074	0.572	0.09	0.072	0.116	0.718645
ENSG00000143190	POU2F1	12.229	10.076	21.012	2.602	1.616	5.121	5.045	5.051	2.357	3.168	9.738	3.396	2.522	1.361	2.651	4.825	1.725	2.529	1.784	2.076	0.718281
ENSG00000106278	PTPRZ1	87.069	79.726	184.175	0	0.001	0	0.809	5.03	20.625	0.594	0	5.678	1.002	0.01	0.01	0.388	2.018	0.097	1.575	0.598	0.717262
ENSG00000121774	KHDRBS1	147.344	170.011	110.434	59.904	74.284	138.114	64.442	66.987	36.447	51.373	55.529	35.122	71.65	45.6	25.589	43.022	54.136	35.229	60.419	30.3	0.716662
ENSG00000116670	MAD2L2	64.678	58.017	90.182	26.515	36.893	7.418	5.907	5.747	8.004	43.242	11.835	16.946	20.946	10.712	24.262	7.529	6.914	10.857	19.241	12.215	0.71614
ENSG00000213420	GPC2	20.896	14.033	30.758	0.905	0.357	2.581	0.627	1.136	0.26	0.535	1.592	0.294	0.317	0.203	3.525	0.189	0.729	0.226	0.186	0.475	0.713577
ENSG00000187243	MAGED4B	21.94	22.465	64.878	5.097	12.043	4.445	14.8	13.55	0.012	6.167	0.225	0.053	2.615	6.587	6.332	11.44	1.23	0.26	2.244	5.885	0.713404
ENSG00000163872	YEATS2	16.84	18.118	26.247	13.084	9.573	19.365	7.868	8.693	12.882	4.262	7.859	18.773	5.059	11.359	17.014	6.356	6.71	4.013	3.928	4.802	0.713245
ENSG00000166845	C18orf54	10.687	12.583	6.674	3.654	2.512	2.999	1.827	2.117	2.448	1.396	0.197	2.292	0.279	3.033	3.537	0.209	0.725	0.642	0.744	0.306	0.71238
ENSG00000127616	SMARCA4	71.842	104.44	102.632	48.101	72.316	33.601	27.273	30.639	20.887	64.172	31.952	39.206	30.094	18.545	29.93	24.242	39.136	30.218	26.023	48.402	0.709903
ENSG00000137656	BUD13	18.639	23.298	26.978	13.206	15.759	14.945	14.65	14.259	10.145	12.114	7.445	13.588	13.193	11.033	16.636	11.37	10.686	6.471	16.917	10.723	0.709508
ENSG00000148204	CRB2	2.414	10.073	9.216	0.184	0	0.66	1.644	2.537	0	0.035	2.485	0.005	1.535	0.003	0.002	0	0.173	0.023	0.239	0.186	0.709032
ENSG00000176244	ACBD7	4.87	10.076	7.066	0.61	0.094	2.156	0.931	1.265	0.083	0.098	0.064	0.141	1.366	0.682	1.536	0.212	0.15	0.054	0.128	0.066	0.708785
ENSG00000136715	SAP130	23.311	31.436	52.643	21.097	38.209	12.249	21.119	17.112	9.768	32.47	28.16	12.42	16.346	8.344	26.469	19.554	9.938	10.384	8.102	8.527	0.708742
ENSG00000145428	RNF175	1.873	2.077	2.193	0.367	0.113	0.087	0.119	0.327	0.017	0.023	1.511	0.352	0.286	0.008	0	0.004	0.044	0.121	0	0.032	0.708684
ENSG00000182256	GABRG3	0.213	0.4	1.064	0.006	0.003	0	0.138	0.118	0.003	0.026	0	0	0.079	0	0.001	0	0.009	0	0	0	0.708193
ENSG00000166788	SAAL1	16.807	16.936	10.818	8.398	3.93	13.33	5.583	5.763	9.303	6.314	5.52	9.132	5.993	5.363	3.674	3.74	3.062	3.198	6.527	3.329	0.708156
ENSG00000251349	C9orf30-TMEFF1	53.829	65.994	64.431	6.123	5.228	3.529	2.025	5.757	4.568	5.212	0.996	5.882	5.608	10.986	9.004	1.527	2.025	3.388	6.126	1.61	0.708122
ENSG00000170374	SP7	0.052	0.063	0.116	0.003	0.005	0.072	0.008	0.01	0	0	0.027	0	0.005	0.004	0	0.01	0.008	0.011	0	0.011	0.707428
ENSG00000258472	NA	21.085	29.47	18.231	15.191	12.9	4.998	10.793	8.768	6.461	3.969	6.864	19.995	2.301	10.027	13.158	1.139	3.487	1.144	2.356	4.35	0.707181
ENSG00000144227	NXPH2	1.667	2.62	3.297	0	0.025	0.005	0.141	1.653	0.014	0	0	0.839	0	0.006	0	0.015	0.002	0	0	0	0.707074
ENSG00000115355	CCDC88A	36.55	18.205	58.635	8.137	3.773	25.792	3.069	6.174	3.78	0.738	9.86	5.322	2.441	11.193	3.348	6.937	2.789	4.529	2.995	6.21	0.705681
ENSG00000138160	KIF11	25.34	51.161	22.412	12.518	11.181	6.64	9.362	8.783	5.991	5.622	1.294	10.373	0.219	13.152	7.09	0.351	3.603	0.231	3.526	0.304	0.705398
ENSG00000241697	TMEFF1	43.696	57.197	53.46	4.482	3.764	2.694	1.615	4.621	3.311	3.964	0.733	4.284	4.311	8.234	7.297	1.105	1.55	2.523	4.545	1.214	0.705367
ENSG00000222000	NA	0.014	0.251	0.567	0.391	0.086	0	0.023	0.033	0.024	0	0	0.069	0	0.086	0	0	0.009	0	0	0.023	0.705063
ENSG00000147130	ZMYM3	26.948	33.835	30.751	14.029	14.813	32.571	17.473	14.828	6.463	20.372	9.261	8.826	2.042	8.615	21.334	13.172	8.89	4.636	4.611	11.704	0.704895
ENSG00000175216	CKAP5	35.162	48.712	57.183	37.105	15.167	19.137	22.46	23.603	40.536	10.792	8.357	39.786	15.723	40.098	23.001	15.225	10.283	14.838	8.559	5.539	0.704678
ENSG00000188828	GLRA4	0.175	0.201	0.227	0	0.005	0.137	0.062	0.123	0.132	0	0.067	0.087	0.034	0.008	0	0.01	0.065	0.009	0.024	0.022	0.704055
ENSG00000173273	TNKS	7.315	10.306	20.787	9.438	5.008	8.609	10.9	11.467	6.488	5.126	9.88	4.239	9.378	8.031	5.551	9.835	4.281	4.087	3.554	4.437	0.703628
ENSG00000187607	ZNF286A	22.054	21.277	16.111	3.537	1.836	6.093	3.813	4.257	4.402	1.266	2.451	4.415	6.001	4.657	3.784	1.647	1.814	1.887	1.601	1.73	0.703111
ENSG00000065665	SEC61A2	11.84	6.762	12.281	2.851	2.269	6.559	3.483	4.664	6.261	3.873	5.914	3.68	3.973	4.509	4.631	3.815	2.233	3.823	1.562	2.182	0.702707
ENSG00000105866	SP4	8.932	13.717	18.876	2.053	1.377	5.816	3.661	3.373	1.192	0.693	5.399	1.818	3.904	1.952	3.38	4.393	2.012	2.634	2.029	2.358	0.701808
ENSG00000171681	ATF7IP	20.951	27.193	28.491	10.066	10.65	21.193	13.432	12.151	6.601	5.525	28.306	5.715	10.638	5.522	9.513	15.576	5.923	4.146	3.938	3.932	0.701563
ENSG00000128610	FEZF1	2.328	1.96	5.474	0	0	0	0	0	0	0	0	0	0.018	0	0.002	0.003	0	0	0	0	0.701448
ENSG00000002746	HECW1	1.581	0.551	4.881	2.06	2.231	0.005	0.012	0.151	0.003	0.047	0	0.003	0.04	0.279	0	0.011	0.116	0.005	0.518	0.016	0.701405
ENSG00000076382	SPAG5	33.777	50.546	26.932	22.279	19.487	4.113	15.489	12.005	9.047	7.817	2.92	25.76	2.48	15.433	19.111	0.804	4.403	0.377	3.935	2.042	0.701123
ENSG00000185252	ZNF74	8.268	11.231	16.824	4.127	1.897	6.492	3.853	4.266	3.503	5.247	1.265	3.574	1.599	1.595	5.896	3.09	3.489	1.143	2.762	5.306	0.700626
ENSG00000075340	ADD2	39.656	38.037	40.565	0.023	0.006	1.635	0.095	1.481	0.042	0	1.428	0.034	0.015	0.478	0.021	0.266	0.132	0.238	0.049	0.49	0.699974
ENSG00000158402	CDC25C	11.318	11.62	6.35	6.795	4.155	0.539	2.456	1.953	1.594	2.24	0.275	4.743	0.04	2.687	4.156	0.042	0.518	0.016	0.803	0.015	0.699882
ENSG00000169855	ROBO1	43.845	20.808	61.384	12.401	9.381	1.542	3.697	4.454	13.515	3.362	0.439	14.541	3.165	16.26	3.15	9	4.635	0.94	1.601	1.067	0.699728
ENSG00000181449	SOX2	157.081	169.539	300.798	0.018	0.235	0	0.146	1.23	0.006	0.005	0	0.012	0.015	0.007	0.25	0.096	23.733	0.182	9.38	0.084	0.698889
ENSG00000178531	CTXN1	40.924	59.712	108.719	8.607	14.253	0.978	0.481	4.474	1.334	34.073	0.036	2.169	7.018	0.762	20.009	5.239	8.2	0.508	1.535	3.327	0.698842
ENSG00000060749	QSER1	35.943	40.373	21.035	10.79	9.673	10.995	11.799	10.738	8.6	3.6	4.306	6.854	6.054	7.832	4.347	7.948	4.861	3.93	5.36	4.76	0.698378
ENSG00000163009	C2orf48	1.014	0.38	2.03	0.177	0.546	0.184	0.71	0.575	0.044	0.274	1.061	0.11	0.007	0.079	0.105	0.008	0.252	0.019	0.073	0.166	0.698167
ENSG00000134222	PSRC1	25.259	24.352	33.125	14.13	11.274	0.551	4.912	4.597	3.936	25.9	1.413	13.956	0.562	5.953	11.331	1.044	3.89	0.567	3.006	1.625	0.69809
ENSG00000149136	SSRP1	65.297	88.759	59.485	75.874	52.376	42.691	29.502	28.278	43.087	32.356	20.941	70.482	52.867	42.904	40.538	19.489	18.618	19.55	29.6	17.09	0.697558
ENSG00000129484	PARP2	10.624	12.389	20.019	7.781	8.518	10.554	6.31	7.362	8.043	4.651	4.448	8.665	5.784	7.321	5.443	6.416	6.626	6.992	7.801	8.323	0.69723
ENSG00000162738	VANGL2	54.07	44.265	57.776	0.152	0.092	4.773	14.694	13.261	13.375	17.17	0.095	8.203	5.837	0.011	0.008	3.992	8.781	1.173	2.569	6.962	0.697212
ENSG00000183644	C11orf88	0	0.019	0.056	0.007	0	0.011	0.012	0.026	0.008	0	0	0	0.001	0	0	0	0.002	0	0	0	0.697119
ENSG00000121871	SLITRK3	2.567	1.852	3.285	0	0	0	0.135	0.726	0	0	0	0	0	0.003	0	0	0.337	0	0.079	0.011	0.696754
ENSG00000158164	TMSB15A	80.455	128.771	336.461	3.198	6.415	0.707	5.236	9.295	0.044	9.197	0	0.586	0.601	14.554	9.091	0.316	0.285	0.152	3.393	0.498	0.696478
ENSG00000205208	C4orf46	17.237	22.756	9.298	8.214	11.509	10.503	5.283	5.72	6.016	6.988	3.466	5.492	1.824	9.38	7.255	3.733	2.742	2.091	4.136	2.187	0.696367
ENSG00000042088	TDP1	10.958	13.133	5.609	5.282	7.283	7.14	5.002	4.588	8.241	4.52	5.559	8.578	2.888	5.056	4.669	1.965	2.038	1.382	3.178	1.742	0.695952
ENSG00000187323	DCC	1.133	1.64	6.3	0.275	0.862	0.001	0.183	0.308	0	0	0	0	0.002	0.152	0	0.113	0.028	0.002	0.026	0.078	0.69586
ENSG00000143889	HNRPLL	11.377	18.772	19.2	10.922	5.256	12.094	9.333	10.714	10.892	7.716	7.602	7.41	13.867	12.432	8.066	7.654	6.638	7.415	9.999	4.351	0.695348
ENSG00000180357	ZNF609	14.715	20.556	41.863	17.2	14.271	34.758	14.594	15.423	9.711	10.78	20.995	13.988	17.96	8.321	17.582	13.43	8.337	9.762	9.54	8.818	0.69414
ENSG00000197121	PGAP1	8.528	9.779	15.553	1.721	0.799	5.568	9.36	7.816	3.775	1.001	1.556	2.351	2.722	3.376	2.412	5.175	2.337	1.291	0.817	2.994	0.694084
ENSG00000162490	C1orf187	17.038	19.38	53.499	0.107	0.168	0.174	0.1	0.3	0.001	0.001	1.439	0.073	6.222	0.104	0.528	0	0.014	0.033	0.062	0.025	0.694029
ENSG00000167524	NA	7.228	6.788	8.771	4.518	3.114	3.994	4.614	4.782	2.379	1.126	5.484	3.968	1.512	1.951	4.736	1.294	2.748	1.265	1.099	5.622	0.69379
ENSG00000198553	KCNRG	5.629	4.063	12.81	2.981	0.972	2.169	4.052	5.04	3.293	2.27	1.738	1.644	1.134	4.335	2.874	2.742	1.935	1.537	1.197	0.611	0.693673
ENSG00000006283	CACNA1G	1.479	1.225	3.73	0.055	0.258	0.001	0.839	0.919	0.026	0.013	0.005	0.026	1.127	0.025	0.002	0.039	0.086	0.065	0.103	0.21	0.693525
ENSG00000164651	SP8	3.393	13.343	26.577	0	0	0	2.795	0	0.157	0.003	0	0.133	0.001	0	1.109	0.015	0	0	0	0	0.693165
ENSG00000180340	FZD2	10.905	31.376	70.597	61.003	37.468	0.08	2.091	2.915	3.185	20.803	1.648	4.687	1.539	14.49	16.089	0.355	5.324	2.753	1.179	1.285	0.692976
ENSG00000142549	IGLON5	39.918	36.561	118.728	0.036	0.029	0.241	0.834	2.01	0.003	2.14	0.056	0	0.027	0.005	0	0.065	0.294	0.077	0.072	0.14	0.692556
ENSG00000121621	KIF18A	7.193	13.373	6.722	5.234	1.718	2.538	2.876	2.624	2.706	1.311	0.537	5.592	1.007	6.057	1.87	0.139	0.941	0.137	0.937	0.087	0.692393
ENSG00000154920	EME1	6.751	7.268	2.73	4.772	6.133	3.766	3.344	3.203	2.096	2.176	1.718	5.382	0.153	2.84	2.522	0.073	1.341	0.206	0.77	0.371	0.692305
ENSG00000186047	DLEU7	0.569	1.336	3.293	0	0.001	0.167	0.16	0.186	0	0	0.595	0	0.006	0	0	0.028	0.034	0.031	0.035	0.079	0.691816
ENSG00000154545	MAGED4	18.585	19.134	67.65	5.978	13.092	4.591	15.688	14.447	0.017	6.198	0.138	0.073	2.322	6.627	6.144	13.161	1.311	0.279	2.159	5.689	0.691696
ENSG00000138443	ABI2	38.884	34.464	45.74	13.832	9.076	30.187	9.495	13.617	5.112	8.296	5.435	8.73	9.843	16.866	9.757	16.426	9.355	14.246	8.816	5.517	0.691126
ENSG00000171634	BPTF	48.525	45.564	37.439	15.87	15.028	34.808	18.177	18.148	12.712	6.666	32.539	16.535	21.639	17.012	11.36	23.764	9.45	8.273	7.631	8.762	0.690984
ENSG00000137142	IGFBPL1	20.2	47.044	43.801	0.125	0.306	0	2.181	2.809	0.023	0	0	0.093	0.14	0.006	0.079	3.241	0.478	0.015	1.181	0.789	0.690894
ENSG00000221946	FXYD7	7.596	4.271	10.248	0.055	0.013	0.265	0.119	1.88	0.03	1.091	4.226	0.134	0.044	0.007	0.03	0.046	0.15	0.065	0.077	0.184	0.690795
ENSG00000183763	TRAIP	8.263	8.534	5.588	6.044	6.57	1.452	2.49	2.333	2.192	4.361	0.615	6.307	0.481	1.791	3.428	0.324	1.818	0.462	1.227	1.074	0.690758
ENSG00000188368	PRR19	2.462	2.652	10.213	0.903	1.476	3.365	2.385	2.316	0.293	5.071	0.454	1.371	1.065	0.221	1.01	0.58	0.734	0.074	0.865	0.526	0.690219
ENSG00000106571	GLI3	5.664	14.848	18.839	13.751	13.748	0.024	1.564	2.99	2.355	8.953	0.734	3.314	10.229	4.326	4.795	1.753	3.18	1.243	3.095	0.717	0.69013
ENSG00000256463	SALL3	10.155	19.472	48.466	0.009	0.013	0	0	0.002	0	5.412	0	0	0.009	0.002	0	0	0.107	0.044	0	0.046	0.690054
ENSG00000204682	C10orf114	7.025	11.44	8.303	2.93	1.011	7.24	2.278	6.471	1.408	0.492	0	1.663	0.321	1.065	1.753	0.476	1.247	2.727	2.118	1.079	0.689874
ENSG00000186897	C1QL4	0.247	1.99	3.803	0.124	0.197	0	0.077	0.018	0.085	0.315	0	0.046	0.169	0.049	0.026	0.035	0.014	0.008	0.031	0	0.689625
ENSG00000188322	SBK1	67.102	38.73	103.63	0.044	0.069	0.668	1.315	2.243	0.032	0.845	13.718	0.099	2.888	0.004	0.223	2.094	0.454	1.584	1.603	2.4	0.689359
ENSG00000178602	OTOS	0.23	0.12	0.244	0	0.017	0	0	0	0	0	0	0	0.02	0	0	0	0	0	0	0	0.689134
ENSG00000142408	CACNG8	2.825	1.763	3.047	0.028	0.068	0.106	0.021	0.109	0.001	0.017	0.481	0	0.031	0.013	0.183	0.005	0.054	0.095	0.044	0.063	0.689065
ENSG00000117713	ARID1A	25.336	44.104	67.084	37.053	45.105	33.218	28.647	29.334	7.749	29.885	53.247	9.565	18.761	7.373	21.195	29.358	17.779	18.492	12.094	20.23	0.688981
ENSG00000150471	LPHN3	5.345	5.991	15.139	0.027	0.03	0.003	3.796	4.635	0.179	0.003	0.006	0.067	0.09	0.028	0.001	0.071	0.836	1.107	1.086	0.197	0.688139
ENSG00000086506	HBQ1	3.712	0.574	4.333	0.31	0.36	1.648	0.249	0.559	0.327	0.189	0.465	0.327	0	0.04	0.82	0.03	0	0.06	0	0	0.688108
ENSG00000163449	TMEM169	2.255	4.191	3.81	0.067	0.015	0.226	1.625	1.996	0.024	1.121	0.171	0.107	0.071	0.058	0.006	0.741	0.138	0.111	0.249	0.313	0.687946
ENSG00000140534	C15orf42	11.375	12.093	7.018	3.824	9.26	2.266	2.086	1.975	1.822	4.463	0.161	6.148	0.014	1.411	3.214	0.011	3.057	0.027	0.315	0.042	0.687748
ENSG00000131747	TOP2A	90.83	124.297	61.692	38.424	21.592	3.052	31.76	29.119	14.604	8.544	1.562	37.907	0.406	40.907	14.532	0.127	12.602	0.176	6.183	0.186	0.687409
ENSG00000168137	SETD5	43.788	32.421	41.361	22.489	15.229	25.033	22.607	25.046	14.598	6.295	20.395	16.87	27.795	15.826	19.733	21.187	14.064	10.454	9.435	20.747	0.686988
ENSG00000056277	ZNF280C	6.287	9.39	5.159	5.73	2.386	4.976	2.849	3.338	3.515	0.937	2.519	2.966	3.278	5.977	3.141	3.372	1.3	0.688	1.281	1.159	0.686646
ENSG00000121904	CSMD2	3.165	1.741	9.657	0.987	0.856	0.002	0.03	0.084	0.598	0.001	0	0.005	0.016	1.034	0.003	0.118	0.075	0.034	0.057	0.324	0.686284
ENSG00000112290	WASF1	22.593	32.345	120.385	26.78	20.441	23.407	2.417	6.193	15.344	10.521	0.906	18.138	18.908	20.247	22.385	12.882	7.34	1.167	5.9	5.435	0.686153
ENSG00000110887	DAO	0.009	0.008	0.04	0.006	0.001	0	0.002	0.007	0.003	0	0	0	0.009	0	0	0	0.002	0	0	0	0.685946
ENSG00000142731	PLK4	17.303	21.995	9.327	5.695	5.468	4.837	4.215	3.995	6.229	2.698	1.173	7.291	0.162	6.304	5.22	0.218	2.1	0.153	1.916	0.349	0.685624
ENSG00000101868	POLA1	10.362	17.889	8.476	5.945	5.804	10.6	6.378	6.14	2.022	5.084	2.744	2.103	2.707	1.84	1.185	3.62	4.354	3.673	3.953	2.152	0.685564
ENSG00000092847	EIF2C1	18.172	22.189	18.254	9.713	13.945	18.47	12.508	11.153	6.168	10.287	21.605	10.685	5.398	11.436	9.777	10.175	6.775	6.057	9.235	7.146	0.68508
ENSG00000151923	TIAL1	29.277	30.684	34.041	27.841	20.601	39.004	27.803	31.326	27.825	12.279	34.798	21.861	27.065	27.364	18.287	20.944	19.584	14.432	14.911	16.317	0.684741
ENSG00000176887	SOX11	20.887	29.78	97.092	1.259	0.964	0.003	1.219	2.372	0.001	2.126	0.005	0.002	0.533	1.204	0.005	0.033	0.014	0.872	0.059	0.033	0.684299
ENSG00000105605	CACNG7	47.335	23.312	99.827	1.153	2.158	0	0.415	0.951	0	0.009	0	0	0.047	0.861	0.948	0.553	0.058	0	0.046	0.122	0.684195
ENSG00000182272	B4GALNT4	27.206	27.113	78.969	0.86	0.512	1.961	3.599	8.414	5.848	2.091	0.428	5.205	6.005	1.518	5.651	2.64	3.118	0.248	0.973	4.475	0.684191
ENSG00000115526	CHST10	13.969	12.176	27.787	4.086	4.402	8.681	1.332	2.353	1.018	8.59	2.844	4.046	1.617	3.062	7.117	4.343	2.491	3.766	2.635	3.446	0.684096
ENSG00000102290	PCDH11X	3.001	2.665	2.864	0	0	0	0.036	0.016	0.002	0	0	0.001	0.023	0.004	0.002	0	0.104	0.001	0.022	0.009	0.683385
ENSG00000117724	CENPF	50.95	45.768	21.818	15.63	6.793	4.129	8.647	8.367	4.448	1.831	0.512	5.03	0.202	8.623	2.912	0.051	2.134	0.144	0.331	0.063	0.682678
ENSG00000048991	R3HDM1	21.699	17.039	20.491	13.97	13.399	17.439	5.478	6.214	11.562	5.956	11.385	14.761	3.646	11.51	13.053	14.133	3.79	3.385	4.679	4.841	0.68229
ENSG00000134323	MYCN	62.437	64.287	40.67	0.018	0.004	18.881	8.859	9.56	0.051	0	0.096	0	0.359	0.004	0.464	1.141	0.404	0.191	1.854	0.209	0.681125
ENSG00000172244	C5orf34	5.157	6.311	3.309	3.047	2.104	2.654	1.098	1.29	2.39	1.967	0.794	3.962	0.794	2.199	1.563	0.258	1.968	0.285	0.987	0.408	0.680619
ENSG00000094916	CBX5	48.862	70.898	36.123	20.369	36.235	22.638	23.797	22.872	14.736	14.774	8.546	23.186	12.522	30.817	20.88	24.513	5.935	10.262	10.929	7.728	0.680617
ENSG00000115318	LOXL3	6.575	7.999	10.888	9.141	14.902	9.523	2.923	3.333	0.189	2.598	5.361	1.476	0.701	8.283	0.79	1.897	2.779	2.091	1.463	2.336	0.680356
ENSG00000117650	NEK2	6.721	16.124	11.147	9.462	2.341	0.569	5.41	4.534	3.524	5.717	0.137	8.517	0.105	6.758	3.38	0.021	2.492	0.034	2.499	0.043	0.680347
ENSG00000129951	MIR3187	44.298	27.02	116.055	0.11	0.055	0.942	0.284	2.608	0.024	0.034	0.883	0.01	0.015	0.175	1.219	0.017	0.017	0.017	0.046	0.066	0.680126
ENSG00000215897	ZBTB8B	3.092	2.526	2.905	0.006	0.006	0.004	0.106	0.238	0.007	0.192	0	0.064	0.078	0	0.016	0.208	0.054	0.022	0	0.095	0.679118
ENSG00000254726	MEX3A	23.343	37.811	92.725	4.067	1.847	2.74	2.713	4.11	1.031	14.273	0.014	1.313	3.387	0.886	21.227	0.381	0.454	0.383	1.585	0.972	0.679097
ENSG00000140443	IGF1R	37.764	20.959	29.062	20.873	18.542	10.698	17.02	13.297	11.581	10.306	17.193	10.255	17.171	5.391	7.938	20.991	7.031	9.499	4.534	11.933	0.679001
ENSG00000011677	GABRA3	8.695	3.585	14.54	0	0	0	0.723	0.242	0.104	0.199	0	0.007	0	0.003	0	0.396	0.134	0	0.021	0	0.678637
ENSG00000185666	SYN3	2.185	1.92	1.975	0.024	0.021	0.105	0.035	0.57	0.003	0.62	0.092	0.005	0.026	0.013	0.001	0.167	0.07	0.065	0.059	0.076	0.678441
ENSG00000044459	CNTLN	4.346	5.309	5.295	1.915	1.945	6.097	1.37	1.562	0.692	0.513	1.248	1.081	0.415	2.939	1.707	1.281	1.509	1.004	1.171	1.059	0.677874
ENSG00000180370	PAK2	21.907	32.444	62.04	34.374	29.737	50.081	25.964	29.851	34.659	19.534	49.341	22.484	28.255	29.83	17.722	20.732	17.65	23.005	26.312	13.501	0.677762
ENSG00000169992	NLGN2	40.812	24.372	74.972	25.662	32.961	9.838	3.519	7.861	3.809	18.614	3.528	4.236	15.695	7.041	16.335	10.381	19.579	7.513	2.794	13.472	0.676994
ENSG00000092051	JPH4	15.91	10.17	18.028	0.009	0.001	0.517	0.191	3.148	0.02	0.057	0.197	0.007	0.873	0.002	0.019	2.083	0.45	0.062	0.328	0.584	0.676092
ENSG00000157456	CCNB2	57.57	72.784	62.336	45.136	21.861	6.053	12.725	10.978	18.886	39.077	1.254	54.306	0.215	30.011	38.072	0.117	3.584	0.117	6.155	0.203	0.675894
ENSG00000040608	RTN4R	13.806	8.925	24.537	1.521	0.69	1.809	9.231	2.634	2.453	13.546	0.364	5.975	2.34	0.502	1.623	0.706	0.91	0.806	1.78	1.39	0.675686
ENSG00000163781	TOPBP1	15.796	21.086	17.868	9.359	9.393	26.88	13.228	13.332	11.243	4.442	16.042	12.822	7.384	12.617	7.428	7.161	6.021	5.005	8.939	5.111	0.67544
ENSG00000129810	SGOL1	14.672	16.77	6.201	4.819	3.806	1.76	2.017	1.787	1.221	2.125	1.359	2.248	0.023	1.935	1.147	0.105	0.807	0.028	1.139	0.069	0.674842
ENSG00000203908	C6orf221	0.108	0.045	0.208	0	0	0.005	0	0.018	0	0	0	0	0.018	0	0	0	0.007	0	0	0	0.674193
ENSG00000011332	DPF1	2.072	3.814	21.488	1.323	5.364	0.714	0.144	0.465	0.598	1.867	0.385	0.624	0.197	0.823	0.534	0.519	0.044	0.052	0.166	0.172	0.673342
ENSG00000074201	CLNS1A	30.628	32.559	44.714	28.779	14.421	54.847	28.267	24.888	29.132	22.832	14.324	22.984	9.972	22.127	14.827	14.878	16.256	13.657	25.778	12.503	0.673309
ENSG00000198824	CHAMP1	27.267	33.8	21.419	31.708	49.008	10.984	12.919	13.114	8.956	23.335	12.887	13.861	5.659	18.806	7.438	10.539	3.879	3.28	6.135	4.437	0.673228
ENSG00000139354	GAS2L3	6.225	4.222	31.569	6.934	2.82	0.569	11.213	9.938	0.926	9.76	0.812	2.141	1.175	5.409	2.974	0.477	0.874	0.281	1.085	0.942	0.673102
ENSG00000215612	HMX1	0.059	0.211	0.386	0.029	0	0	0.004	0.009	0	0	0	0	0.005	0	0	0	0.01	0.031	0	0.026	0.67282
ENSG00000130939	UBE4B	24.777	24.203	19.202	16.334	13.565	18.672	15.596	16.084	6.964	14.208	13.068	8.566	14.797	9.752	7.652	16.672	10.562	12.132	9.127	10.322	0.672571
ENSG00000129195	FAM64A	63.206	88.11	47.466	39.769	32.001	0.318	4.795	4.724	5.339	43.721	0.18	20.193	0.212	11.27	30.411	0.011	1.258	0.154	4.985	0.08	0.672458
ENSG00000078725	DBC1	20.12	11.23	33.24	0.121	0.053	0	0.106	0.356	0.919	0	0	0.668	8.641	0.024	0.026	0.537	0.555	0.123	0.099	0.087	0.671412
ENSG00000120647	CCDC77	10.583	11.616	8.199	2.552	2.216	6.048	3.437	3.741	2.777	1.297	2.505	2.664	0.979	3.465	1.766	2.029	2.947	1.351	3.454	2.978	0.671258
ENSG00000172687	ZNF738	41.109	30.993	25.757	2.04	2.524	13.525	7.701	7.857	4.147	0.886	3.025	4.052	0.961	2.801	7.701	2.061	3.172	1.336	2.587	3.037	0.670995
ENSG00000126970	ZC4H2	6.349	9.256	27.821	2.619	3.592	8.257	2.591	3.54	2.291	3.241	2.364	4.145	1.116	4.237	5.273	3.253	2.18	1.917	3.803	1.902	0.670936
ENSG00000134595	SOX3	20.734	15.534	17.118	0	0.01	0	0	0.009	0	0	0	0	0.013	0.021	0.013	0.015	0.007	0.015	0	0	0.670927
ENSG00000112029	FBXO5	17.728	24.041	9.534	7.103	10.742	3.587	5.988	5.699	3.22	3.517	3.131	9.351	4.114	8.452	5.507	2.382	1.266	0.788	3.572	0.573	0.67052
ENSG00000143702	CEP170	13.161	15.971	42.35	21.112	9.924	22.098	2.48	4.939	10.622	1.813	6.404	8.845	3.345	26.937	15.724	3.849	2.693	3.354	2.698	2.176	0.670467
ENSG00000165300	SLITRK5	4.52	7.479	4.355	0.121	0.595	3.176	0.055	0.73	0.024	0.165	0.147	0	0.128	0.302	0.057	0.771	0.145	0.03	0.014	0.74	0.670164
ENSG00000074657	ZNF532	77.193	52.511	123.996	22.139	11.226	3.68	9.286	13.793	23.35	2.654	4.397	23.888	26.178	24.283	24.182	7.324	17.923	13.746	11.591	7.144	0.669941
ENSG00000188312	CENPP	1.776	1.997	2.187	1.492	1.69	2.8	1.924	2.126	0.723	1.151	2.817	1.407	0.538	0.933	0.718	0.551	1.239	0.601	0.78	0.623	0.669694
ENSG00000146426	TIAM2	4.372	4.033	13.319	3.236	2.044	3.563	5.055	5.074	1.515	0.48	3.66	1.007	4.457	2.521	1.912	2.154	2.568	2.016	1.866	2.374	0.669468
ENSG00000111605	CPSF6	40.028	45.978	38.344	17.535	15.898	59.367	29.096	32.852	17.828	14.034	22.68	18.568	21.801	15.369	28.439	18.491	10.615	6.229	10.561	13.992	0.669333
ENSG00000144057	ST6GAL2	10.037	3.17	10.317	0.012	0.001	6.336	0.507	2.542	0.124	0.007	0	0.006	0.254	0.002	0	0.055	1.145	0.086	0.193	0.072	0.669135
ENSG00000179314	WSCD1	14.157	19.654	23.665	19.177	8.851	0.017	1.065	1.17	0.001	3.675	0.012	0	0.01	0.189	15.845	1.461	0.892	2.786	0.978	1.253	0.669073
ENSG00000250584	NA	0.018	0.018	0.017	0	0	0	0	0.002	0	0	0.011	0	0	0	0	0	0	0	0	0	0.668804
ENSG00000105426	PTPRS	103.966	51.119	209.14	37.582	43.824	0.585	5.202	10.807	3.229	33.068	3.624	6.168	11.853	18.948	7.98	15.338	20.649	4.723	8.699	34.89	0.668415
ENSG00000172733	PURG	2.083	3.306	10.844	0.096	0.041	0.824	0.388	0.879	0	0.034	0	0	0.142	0.182	1.073	0.045	0.186	0.045	0.445	0.125	0.668373
ENSG00000099715	PCDH11Y	1.259	1.041	1.751	0	0.001	0	0.223	0.09	0	0	0	0	0.002	0.001	0.003	0.003	0.387	0.001	0.127	0.02	0.667995
ENSG00000257529	NA	158.231	323.047	572.515	261.811	297.223	465.118	240.586	209.729	433.292	96.393	162.651	187.982	415.778	201.154	80.908	194.442	152.397	145.964	148.107	76.835	0.667219
ENSG00000154645	CHODL	0.425	1.874	3.534	0.016	0.001	0.697	0.541	0.633	0.973	0.013	0.339	0.008	0.211	0.018	0.004	0.642	0.406	0.124	0.103	0.126	0.666875
ENSG00000134986	C5orf13	48.837	47.853	250.379	6.317	14.332	32.916	13.504	31.367	1.599	0.24	1.795	1.022	0.406	37.272	22.283	2.531	2.937	4.657	4.151	1.539	0.666132
ENSG00000111445	RFC5	16.62	20.89	12.327	6.287	11.741	11.482	10.278	9.882	8.126	9.123	4.722	16.106	2.594	5.809	7.886	3.962	5.966	3.239	6.101	5.099	0.666104
ENSG00000169607	CKAP2L	8.377	10.384	10.289	7.604	5.716	1.718	3.053	3.029	5.278	1.174	0.199	12.72	0.032	5.898	2.111	0.018	1.591	0.015	1.214	0.034	0.66605
ENSG00000010292	NCAPD2	43.583	50.316	32.83	48.957	46.582	20.023	20.605	19.454	16.794	34.788	15.251	48.688	5.667	21.421	28.839	6.873	11.116	5.479	10.645	6.278	0.665998
ENSG00000119596	YLPM1	18.272	20.128	30.242	18.295	20.571	28.829	14.193	14.379	3.86	10.408	19.629	3.801	14.588	4.395	5.155	16.787	9.056	7.828	9.498	13.724	0.664933
ENSG00000136099	PCDH8	0.226	4.753	8.082	0.012	0	0.041	0.347	1.111	0	0.006	0.008	0	0.469	0	0	0.367	0.016	0.002	0.145	0.026	0.664885
ENSG00000104290	FZD3	13.571	15.86	14.898	0.435	0.233	1.815	2.011	1.492	3.111	2.297	1.024	2.377	2.372	0.101	0.352	3.903	1.18	0.886	1.795	1.189	0.664322
ENSG00000125247	TMTC4	13.634	12.628	30.263	3.819	4.12	9.682	9.239	8.684	2.41	3.698	4.039	2.15	0.387	2.93	11.042	4.174	4.765	1.623	5.74	6.519	0.664179
ENSG00000253729	PRKDC	39.134	70.141	22.59	52.941	36.593	32.336	27.942	27.68	37.175	23.46	21.953	43.159	22.52	36.103	21.474	14.621	10.28	13.93	6.119	5.577	0.663773
ENSG00000063515	GSC2	0.065	0.03	0.173	0.003	0.01	0	0	0.009	0.016	0	0	0.035	0	0	0	0	0	0.006	0	0	0.663691
ENSG00000135847	ACBD6	25.154	25.916	30.144	27.255	24.679	32.32	12.879	14.282	19.948	17.99	14.78	26.19	20.956	23.177	20.325	14.544	13.877	14.721	17.551	16.505	0.663036
ENSG00000150086	GRIN2B	0.328	0.283	1.234	0.007	0	0	0.017	0.004	0.001	0.041	0	0	0	0.001	0	0.01	0.004	0.01	0.01	0.017	0.66279
ENSG00000144028	SNRNP200	35.734	70.373	68.22	42.048	41.268	67.962	51.974	51.943	34.331	35.423	74.498	40.841	57.471	28.572	48.758	28.84	30.207	24.466	18.115	28.189	0.662343
ENSG00000084628	NKAIN1	32.612	27.676	41.599	0.031	0.084	0.007	0.131	1.528	0.012	1.595	0.015	0.066	0.116	0.066	0.269	10.095	0.155	0.011	0.065	0.412	0.661525
ENSG00000056487	PHF21B	7.337	6.672	22.923	0.076	0.025	0.002	0.042	0.242	0.009	0.119	0.021	0.003	1.07	0.008	0.005	1.476	0.113	0.026	0.124	0.767	0.66124
ENSG00000164100	NDST3	0.189	0.478	0.747	0.017	0.019	0.072	0.349	0.374	0	0.117	0	0.002	0.001	0.042	0.022	0.019	0.01	0	0.233	0.015	0.66114
ENSG00000196376	SLC35F1	7.327	10.722	33.741	0.01	0.019	0	0.696	3.267	0.001	0.335	0.014	0.006	0.113	0.199	0.003	0.542	0.394	2.384	0.346	0.385	0.661113
ENSG00000144285	SCN1A	0.626	0.382	1.944	0.009	0.001	0.004	0.019	0.101	0.002	0.006	0.003	0.001	0.003	0.024	0	0.009	0.002	0.061	0	0.024	0.660556
ENSG00000204371	EHMT2	27.533	40.731	63.814	15.717	15.858	19.762	14.171	13.753	6.161	36.776	13.161	10.448	4.81	7.215	16.265	10.573	15.303	4.808	16.55	21.395	0.660536
ENSG00000113758	DBN1	173.405	125.154	191.699	79.899	89.865	12.761	8.113	17.103	26.709	54.233	3.07	18.97	10.664	44.982	119.761	9.431	30.415	11.943	26.967	26.87	0.660153
ENSG00000182378	PLCXD1	27.892	34.288	15.934	9.634	14.317	11.733	14.941	12.696	3.952	11.49	6.761	3.282	1.705	2.463	5.995	2.879	6.765	7.42	9.949	6.748	0.660012
ENSG00000130032	PRRG3	2.192	1.436	4.432	0.011	0.005	0	0.367	1.155	0	0	0	0	0.007	0.017	0.002	0.03	0.401	0.46	0.199	0.082	0.65852
ENSG00000156475	PPP2R2B	4.923	7.168	7.424	0	0.004	0.295	0.717	1.764	0.116	0.017	2.799	0.067	0.06	0.151	0	1.513	1.429	0.02	0.148	0.333	0.658156
ENSG00000145721	LIX1	0.089	6.415	18.492	0	0	0.045	2.003	2.441	0.005	0.006	0.369	0	0.001	0	0	0.002	0.027	0	0.188	0.013	0.658146
ENSG00000142449	FBN3	12.961	9.586	8.577	0	0	0.008	0.887	1.484	0	0.001	0.028	0.006	0.011	0.001	0.001	0.018	0.018	0.006	0.003	0.058	0.657659
ENSG00000092140	G2E3	12.339	13.588	6.586	3.575	1.685	5.477	4.466	4.698	5.232	1.305	6.254	4.083	2.871	4.148	1.529	2.24	2.256	1.732	2.667	1.765	0.657572
ENSG00000182504	CEP97	2.313	4.171	10.04	2.068	1.505	6.298	2.213	2.95	1.835	1.78	2.279	1.022	1.481	1.332	1.473	2.906	1.728	2.263	1.356	1.274	0.65723
ENSG00000188162	OTOG	0.18	0.059	0.435	0	0	0	0.032	0.034	0	0	0	0	0	0	0	0.006	0.004	0	0	0.012	0.657189
ENSG00000099617	EFNA2	7.66	10.854	22.703	0.036	0.102	0.008	15.997	15.714	0.005	0.648	0	0	0.277	0	0.748	0.051	0.201	0	0	0.064	0.656931
ENSG00000179837	RBM15B	29.222	33.681	24.999	27.651	30.738	31.722	17.063	16.785	12.791	28.268	21.16	21.964	21.188	14.283	21.807	18.359	15.716	11.638	20.344	11.543	0.656861
ENSG00000196230	TUBB	1052.64	1352.52	2736.31	766.803	1925.96	270.193	188.615	256.778	884.299	1345.18	92.9	1258.78	299.012	1157	1098.01	173.284	177.441	284.38	267.233	88.751	0.65681
ENSG00000124766	SOX4	163.166	77.98	388.403	0.922	1.93	92.826	25.015	29.073	18.158	25.802	6.124	8.818	43.63	5.996	27.829	12.844	9.596	4.837	48.218	21.737	0.656417
ENSG00000135451	TROAP	18.96	13.239	30.97	18.139	9.723	0.824	4.89	4.674	2.175	21.432	0.253	7.59	0.11	2.853	14.351	0.106	6.501	0.042	3.891	0.604	0.65616
ENSG00000066135	KDM4A	27.529	36.447	18.911	22.812	9.134	23.208	29.037	29.179	22.754	11.03	14.13	15.33	12.304	13.685	16.439	9.347	10.712	6.781	11.848	12.778	0.655944
ENSG00000173473	SMARCC1	89.099	97.567	38.888	26.114	29.502	57.694	30.031	27.506	19.14	19.174	28.703	20.055	21.489	16.021	19.808	15.498	17.692	11.002	23.904	13.17	0.6556
ENSG00000138336	TET1	30.512	27.209	17.68	1.485	0.99	2.731	2.871	2.232	0.066	0.629	0.467	0.416	0.096	2.455	0.258	0.911	0.3	0.401	0.311	0.236	0.655567
ENSG00000176788	BASP1	151.01	124.906	494.915	89.531	75.877	9.586	3.795	18.054	126.65	25.668	36.156	65.252	16.259	195.445	65.123	1.686	18.091	1.768	56.657	2.736	0.655496
ENSG00000123219	CENPK	11.154	13.774	3.513	4.08	3.657	6.148	3.951	3.683	2.667	1.444	2.449	3.32	0.102	3.301	1.994	0.1	2.088	0.206	2.276	0.17	0.655265
ENSG00000168875	SOX14	0.699	0.298	1.118	0	0	0	0.006	0	0	0	0	0	0	0	0	0	0.114	0.012	0	0	0.655091
ENSG00000138376	BARD1	8.419	9.969	4.719	2.88	4.314	5.221	4.893	4.78	2.295	2.35	2.375	5.182	1.007	4.404	2.458	0.714	4.041	1.223	1.793	1.505	0.654657
ENSG00000175575	PAAF1	6.433	5.689	8.566	5.196	4.302	7.25	6.352	6.103	5.818	5.603	3.372	4.736	1.075	4.353	3.07	4.049	3.83	3.828	4.686	4.921	0.653576
ENSG00000066044	ELAVL1	26.516	38.901	30.951	20.726	31.686	15.389	15.476	16.929	20.536	35.42	11.373	24.915	21.038	21.388	20.611	14.673	10.879	13.085	15.514	10.052	0.653405
ENSG00000174371	EXO1	12.422	16.676	6.304	5.211	6.716	2.635	2.406	2.481	2.697	5.295	0.356	8.375	0.131	5.981	2.377	0.06	0.821	0.039	1.232	0.055	0.65337
ENSG00000243943	ZNF512	19.673	22.731	34.758	18.346	8.094	39.138	16.296	17.866	14.192	6.227	10.595	9.963	14.929	19.318	11.908	14.276	11.027	9.748	10.242	7.558	0.653067
ENSG00000181191	PJA1	17.522	29.614	71.458	10.888	6.98	10.262	14.947	17.877	14.862	10.347	7.365	14.336	15.065	12.517	6.219	19.405	9.039	9.271	10.762	4.802	0.652878
ENSG00000078549	ADCYAP1R1	3.926	5.073	14.649	0.069	0.042	0	0.51	2.671	0	0	0	0	0.169	0.001	0.014	0.347	1.582	0.604	0.17	0.595	0.652878
ENSG00000112232	KHDRBS2	4.271	5.457	5.238	0	0.005	4.315	7.113	5.455	0	0	0.443	0	0.015	0	0.01	0.069	0.216	0	0.043	0.072	0.652813
ENSG00000189108	IL1RAPL2	0.418	0.072	0.487	0.111	0.028	0	0.02	0.08	0.128	0	0	0.162	0.068	0.073	0	0.007	0.022	0.009	0	0.009	0.652712
ENSG00000099942	CRKL	36.29	40.05	45.113	24.871	24.795	30.25	39.317	37.068	28.676	16.724	31.198	34.028	41.359	20.351	17.872	24.686	21.622	30.761	15.359	10.689	0.652612
ENSG00000010244	ZNF207	28.655	34.42	39.06	30.189	20.793	40.567	24.79	27.196	25.849	16.138	37.299	30.079	39.119	28.197	33.102	16.96	14.752	9.649	11.704	11.084	0.652562
ENSG00000175063	UBE2C	113.752	106.262	94.28	50.133	62.786	1.402	12.011	11.345	17.346	69.858	0.702	61.879	1.422	21.179	52.607	0.152	21.478	0.181	21.486	0.687	0.652502
ENSG00000138606	SHF	5.897	9.788	14.648	0.837	0.786	7.291	2.748	3.045	0.105	9.563	0.342	0.314	3.553	0.196	0.943	0.992	2.111	1.205	2.651	1.381	0.652436
ENSG00000001167	NFYA	13.316	23.622	29.836	17.428	10.173	41.301	18.041	17.581	11.679	7.49	21.035	8.236	18.405	6.239	10.055	9.701	8.484	6.127	8.527	8.921	0.652318
ENSG00000141622	RNF165	3.11	3.608	10.137	0	0	0.027	0.73	1.295	0.3	0.15	2.496	0.327	2.908	0.006	0	0.147	1.065	0.427	0.025	0.098	0.651937
ENSG00000085999	RAD54L	17.278	22.164	8.316	5.873	16.234	2.963	3.665	3.845	2.312	8.099	0.816	6.573	0.101	2.36	5.59	0.103	2.863	0.221	2.009	0.18	0.651925
ENSG00000135387	CAPRIN1	77.629	105.346	75.024	69.104	50.715	95.474	51.45	51.514	86.121	42.86	33.058	78.766	55.855	87.688	55.368	45.998	28.538	20.446	39.393	21.415	0.651589
ENSG00000214946	TBC1D26	0.151	0.26	0.621	0.012	0.001	0.012	0.063	0.074	0.016	0	0.062	0.007	0.194	0.006	0.041	0.01	0.05	0.014	0	0.053	0.651457
ENSG00000183307	CECR6	6.287	3.303	7.268	0.174	0.375	0.056	0.262	0.619	0.01	1.04	1.186	0.036	0.233	0.048	0.174	1.23	0.289	0.612	0.178	0.311	0.649816
ENSG00000136824	SMC2	23.937	21.814	11.957	8.69	5.357	12.783	11.26	10.698	8.035	2.048	2.133	13.266	1.494	9.813	4.672	2.339	4.029	6.343	4.093	1.073	0.649802
ENSG00000150275	PCDH15	0.03	0.236	0.566	0	0	0	0.019	0.138	0.001	0	0	0	0	0.015	0.018	0.014	0.008	0.014	0.004	0.005	0.64956
ENSG00000084731	KIF3C	17.476	19.315	76.023	7.725	9.313	5.363	1.37	4.655	5.752	26.015	1.542	7.136	4.597	4.705	9.762	9.09	2.633	1.166	3.389	2.339	0.649
ENSG00000080839	RBL1	4.465	7.074	6.022	4.519	7.732	4.67	3.571	4.03	3.011	3.338	5.675	5.747	1.01	7.245	2.98	1.466	2.616	1.474	2.393	1.799	0.648969
ENSG00000226650	KIF4B	0.066	0.176	0.271	0.286	0.162	0.048	0.174	0.173	0.095	0.122	0.021	0.23	0.006	0.206	0.115	0.011	0.008	0.004	0.029	0.012	0.648913
ENSG00000196338	NLGN3	9.982	9.11	51.286	0.163	0.206	1.074	0.782	2.325	0.054	0.376	4.164	0.08	1.373	0.413	0.414	0.361	0.832	0.174	0.178	0.215	0.648693
ENSG00000165388	ZNF488	3.149	2.818	4.691	0.063	0.192	0.21	1.477	1.195	0.999	0.194	0	2.905	0.047	0.042	0.15	0.025	0.645	0.034	0.814	0.035	0.648218
ENSG00000254772	EEF1G	232.361	359.234	517.42	282.325	348.336	710.45	302.786	301.776	313.58	321.001	174.378	321.049	201.221	185.515	364.925	145.37	153.192	147.025	198.283	76.067	0.647862
ENSG00000123307	NEUROD4	0.003	0.483	0.472	0	0	0	0.005	0.009	0	0	0	0	0.002	0	0	0	0	0	0	0	0.647743
ENSG00000158636	C11orf30	6.485	6.801	13.294	3.78	4.612	5.932	3.491	3.691	3.033	1.973	6.234	4.009	7.505	3.954	4.639	6.548	2.51	2.439	1.842	2.652	0.647275
ENSG00000101292	PROKR2	2.45	0.834	2.476	0	0	0	0.007	0.026	0	0	0	0	0.005	0	0	0.032	0.047	0.005	0	0	0.647228
ENSG00000168116	KIAA1586	9.549	14.608	12.535	2.822	2.465	18.267	6.958	7.613	3.947	1.444	1.59	2.573	2.659	5.915	1.59	4.251	2.873	2.348	2.96	1.67	0.64678
ENSG00000163885	CCDC37	0.059	0.139	0.826	0.016	0	0.034	0.126	0.12	0.001	0	0.089	0.012	0	0	0	0	0.01	0	0	0.022	0.646694
ENSG00000122779	TRIM24	38.75	48.856	25.286	3.74	4.374	20.191	13.175	12.721	2.963	1.625	4.794	3.63	4.009	3.496	4.543	6.308	4.359	4.997	6.719	5.11	0.646361
ENSG00000119685	TTLL5	5.456	4.774	9.176	5.167	6.284	8.553	2.486	2.6	2.975	4.521	2.964	3.293	3.437	2.947	6.42	3.933	3	2.229	2.653	2.508	0.646309
ENSG00000152214	RIT2	2.377	0.97	7.923	0	0	0	0	1.041	0	0	0	0	0	0.005	0.019	0	0.109	0	0	0	0.646267
ENSG00000189159	HN1	79.541	65.984	122.881	24.172	39.585	10.338	13.463	16.378	42.613	35.534	10.985	40.907	10.287	29.005	29.725	5.493	35.766	9.421	47.285	9.572	0.646244
ENSG00000156304	SCAF4	25.392	24.568	24.002	24.931	26.862	18.284	18.137	18.958	4.449	14.113	26.225	7.027	30.558	5.281	8.034	15.196	9.505	6.359	6.782	9.684	0.646157
ENSG00000074054	CLASP1	8.978	14.846	53.47	24.036	12.614	14.582	8.467	11.932	6.076	10.108	19.506	4.858	12.85	2.994	5.151	11.254	9.346	12.943	5.229	8.945	0.646113
ENSG00000026652	AGPAT4	9.83	8.224	18.651	1.721	0.873	15.119	1.03	3.356	3.639	0.59	8.626	3.559	2.867	2.554	6.488	1.82	2.33	0.919	0.774	1.802	0.645889
ENSG00000143228	NUF2	13.458	17.48	8.598	5.808	3.39	1.749	3.326	3.37	2.524	1.332	0.522	5.57	0.071	5.304	3.764	0.115	3.821	0.095	2.572	0.45	0.645614
ENSG00000149548	CCDC15	1.797	1.872	1.331	1.66	1.343	2.36	0.939	1.024	0.909	0.239	0.394	2.041	0.102	1.436	0.526	0.435	0.53	0.057	0.323	0.33	0.645288
ENSG00000102230	PCYT1B	9.998	8.752	15.448	0.108	0.03	10.673	0.903	1.663	2.146	0.377	0.122	9.923	3.129	0.11	0.212	1.544	0.588	0.046	0.128	1.137	0.64486
ENSG00000101542	CDH20	0.082	2.056	1.744	0.314	0.274	0.163	0.049	0.173	0.003	0	0.095	0	0.012	0.129	0.006	0.066	0.416	0.022	0.084	0.05	0.644692
ENSG00000196284	SUPT3H	6.979	8.131	10.796	4.232	2.475	14.068	5.16	4.586	3.12	1.487	3.458	2.206	4.157	2.441	2.352	5.475	2.085	1.595	2.502	2.806	0.643735
ENSG00000255994	C14orf162	1.828	1.417	1.872	0	0	0	0	0.074	0	0.046	0	0	0.076	0	0	0.029	0.059	0.108	0.393	0	0.643298
ENSG00000167654	ATCAY	26.034	11.764	85.569	0.025	0.033	0.057	0.226	3.537	0	0	0.012	0	0	0.016	0.008	2.419	0.187	0.002	0.176	0.126	0.643261
ENSG00000048545	GUCA1A	2.531	4.182	2.114	0.109	0.07	0.012	0.159	0.217	0.002	0.378	0.035	0	0.034	0.08	0.094	0.007	0.038	0.004	0.11	0.011	0.643256
ENSG00000133884	DPF2	13.822	15.625	31.147	25.886	16.474	16.261	8.855	9.244	7.585	19.059	13.707	11.848	16.064	14.564	21.353	10.291	9.355	8.755	7.862	6.14	0.642791
ENSG00000106415	GLCCI1	4.99	6.519	44.153	5	4.941	6.956	3.715	4.419	1.104	1.499	8.998	2.062	1.076	1.535	1.193	4.927	1.937	0.87	2.541	2.013	0.642669
ENSG00000183908	LRRC55	0.502	3.595	12.336	0	0	0	0.31	1.696	0	0	0	0	0.058	0.002	0	0.096	0.062	0.108	0	0.116	0.642632
ENSG00000140067	FAM181A	0.003	0.855	2.109	0	0	0	0.003	0.02	0.009	0	0.043	0.099	0.171	0	0	0	0	0	0	0	0.642605
ENSG00000144339	TMEFF2	0.253	0.499	3.557	2.243	1.047	0.052	0.098	0.646	0	0.052	0	0.002	0.007	0.222	0.11	0.03	0.504	0.018	0.331	0.002	0.642533
ENSG00000154118	JPH3	11.479	8.284	16.534	0.022	0.005	0.091	0.154	1.381	0.01	0.157	0.212	0	0.009	0.006	0.358	3.967	0.232	0.019	0.483	0.908	0.642496
ENSG00000103275	UBE2I	59.168	49.595	39.459	29.237	33.909	21.851	20.369	20.973	25.78	38.786	28.017	24.633	23.418	29.921	36.737	10.524	18.894	19.443	24.974	16.142	0.641963
ENSG00000107105	ELAVL2	12.63	5.384	10.445	0.005	0.005	0	0.105	0.439	1.157	0	0	2.422	0.016	0.013	0.026	0.045	0.132	0.006	0.113	0.007	0.641786
ENSG00000148835	TAF5	7.967	9.67	4.993	2.87	2.746	3.295	4.212	4.163	3.11	1.292	3.324	3.324	4.394	2.903	2.44	2.296	2.397	1.779	2.368	2.66	0.641781
ENSG00000152977	ZIC1	0.122	3.341	2.664	0.137	0.03	0	0.011	0.012	0	0	0	0	0.003	0.026	0	0.002	0.003	0.007	0	0.015	0.641772
ENSG00000184144	CNTN2	1.292	1.121	6.272	0.002	0	0.003	0.103	0.408	0.001	0	0.021	0.003	0.035	0.001	0.003	0.022	0.17	0.072	0.029	0.051	0.641544
ENSG00000175161	CADM2	4.909	2.732	13.078	0.045	0.03	0.06	0.788	1.032	0.002	0.003	0	0	0.732	0.021	0.01	0.55	0.588	0.127	0.901	0.365	0.641382
ENSG00000188674	C2orf80	0.92	1.167	6.384	0	0	0.004	0.01	0.442	0	0	0.016	0	0.006	0	0	0.011	0	0	0	0.036	0.641373
ENSG00000197487	GALP	0.012	3.614	3.386	0	0	0	0	0.005	0	0	0	0	0.017	0	0	0	0	0	0	0	0.641266
ENSG00000137267	TUBB2A	281.147	425.397	1819.28	33.157	110.755	9.998	17.829	49.061	43.505	128.973	7.306	77.849	208.652	63.202	74.643	43.495	33.689	25.108	47.618	23.126	0.641221
ENSG00000164109	MAD2L1	38.142	75.411	23.867	17.755	15.74	17.908	14.96	13.578	16.089	13.479	3.142	32.387	1.779	18.338	12.379	0.9	3.635	0.775	8.145	0.733	0.641134
ENSG00000097046	CDC7	19.578	24.691	8.989	2.924	3.586	11.26	5.641	6.165	4.153	2.354	4.408	3.857	3.794	4.507	2.986	1.753	4.017	0.758	3.092	1.546	0.64033
ENSG00000198704	GPX6	0.006	0.015	0.007	0	0	0	0.004	0	0	0	0	0	0	0	0	0	0	0	0	0	0.64028
ENSG00000139618	BRCA2	7.056	6.761	1.24	1.984	2.661	3.205	1.636	1.344	0.654	0.527	0.996	0.887	0.234	0.792	0.497	0.154	0.417	0.052	0.377	0.208	0.640209
ENSG00000135119	RNFT2	8.992	4.24	9.018	0.669	0.563	0.624	0.449	0.552	0.322	1.248	1.014	0.275	0.106	0.892	0.865	2.31	0.115	0.268	0.355	0.612	0.640166
ENSG00000163486	SRGAP2	8.344	15.217	50.765	18.226	16.203	4.71	3.422	7.192	4.973	9.512	14.658	3.731	1.378	5.492	14.472	11.43	6.595	3.636	4.386	5.094	0.640095
ENSG00000187456	RDM1	1.416	2.098	1.31	0.122	0.017	0.217	1.291	1.515	0.345	0.726	0.073	0.901	0	0.201	0.082	0	0.197	0.008	0.163	0	0.63998
ENSG00000111783	RFX4	0.018	5.365	14.684	0.002	0	0.006	0.042	0.048	0	0	0.023	0	0.003	0	0	0.066	0.003	0.007	0	0.052	0.639922
ENSG00000215114	UBXN2B	14.048	19.946	29.279	10.503	2.354	16.742	8.927	9.229	11.568	2.98	11.37	11.278	10.216	11.901	4.714	9.622	4.075	13.067	10.006	4.087	0.639736
ENSG00000130227	XPO7	31.805	44.773	38.372	24.093	16.603	29.39	15.588	16.089	34.288	21.988	18.087	32.844	14.272	28.861	28.396	18.394	13.116	16.03	17.642	10.311	0.639423
ENSG00000166603	MC4R	0.095	0.15	0.966	0	0.015	0	0.186	0.195	0.011	0.053	0	0	0	0	0	0	0.015	0	0	0.036	0.639343
ENSG00000164082	GRM2	1.188	1.11	2.898	0.021	0.113	0.052	0.022	0.061	0.021	0.029	1.49	0.016	0.191	0.01	0.067	0.083	0.088	0.041	0.082	0.223	0.639162
ENSG00000100105	PATZ1	17.679	28.267	28.763	12.189	7.943	20.625	14.911	13.575	1.903	20.293	17.746	2.619	3.631	2.85	11.273	10.754	6.699	4.247	9.547	14.672	0.639117
ENSG00000182667	NTM	8.066	3.783	15.691	7.798	15.752	0.002	0.561	3.491	10.34	0.507	0.02	10.094	0.045	4.488	0.219	0.223	0.659	0.166	0.111	0.138	0.638695
ENSG00000084444	KIAA1467	12.144	7.135	6.253	2.52	2.257	5.41	3.605	2.353	2.322	1.262	1.049	2.804	2.581	3.472	3.161	2.953	1.104	1.207	0.877	1.341	0.638237
ENSG00000198010	DLGAP2	0.434	0.388	0.61	0.002	0	0.323	0.077	0.625	0.006	0	0	0.004	0.029	0	0	0.042	0.042	0.004	0.012	0.073	0.638111
ENSG00000132670	PTPRA	45.751	33.188	70.754	39.996	37.714	42.172	26.136	27.548	33.749	29.057	49.465	38.481	17.561	49.148	39.684	38.037	27.626	13.627	15.55	18.888	0.638068
ENSG00000169877	AHSP	3.801	0.783	7.139	0	0	2.117	0.954	5.112	0.005	0	0.216	0.056	0.018	0	0	0.031	0.036	0	0	0	0.638016
ENSG00000167554	ZNF610	4.66	2.061	7.564	1.19	0.214	2.891	4.755	3.681	1.001	0.245	0.171	0.302	0.75	1.559	0.716	1.472	0.922	1.547	0.645	0.927	0.637848
ENSG00000109805	NCAPG	25.828	33.65	14.513	11.8	10.386	4.055	7.815	7.953	7.647	3.242	1.645	17.904	0.109	11.319	9.703	0.144	5.508	0.089	3.567	0.317	0.637789
ENSG00000163507	KIAA1524	20.08	25.732	8.294	6.457	5.641	4.225	3.828	4.309	3.843	1.207	1.001	7.132	1.714	7.236	3.987	0.685	1.746	0.506	1.541	0.425	0.63705
ENSG00000136891	TEX10	21.663	23.757	7.559	9.899	7.661	18.021	6.705	7.044	14.835	6.744	6.558	11.68	10.307	8.543	5.477	3.71	2.576	2.534	3.966	2.534	0.636908
ENSG00000204366	ZBTB12	12.123	26.307	14.511	5.016	2.058	8.855	8.548	8.03	0.571	8.057	1.161	0.952	0.884	1.092	2.809	0.771	6.428	2.368	5.123	3.885	0.636672
ENSG00000196652	ZKSCAN5	5.494	8.414	5.938	7.937	2.984	5.028	3.851	4.086	5.779	2.581	4.681	5.608	5.371	5.84	3.359	3.205	3.153	3.042	3.441	3.047	0.636657
ENSG00000237649	KIFC1	24.783	37.942	36.709	24.258	32.912	4.127	9.572	9.562	9.13	31.16	2.267	32.943	0.208	12.619	27.671	0.082	6.851	0.179	5.898	0.431	0.636626
ENSG00000065978	YBX1	647.946	660.783	875.232	436.17	545.633	263.304	186.297	182.439	380.003	548.165	172.564	400.947	299.364	288.814	145.213	127.273	276.765	443.44	514.407	141.978	0.636492
ENSG00000161682	FAM171A2	12.929	19.737	62.978	0.884	1.477	4.082	1.603	3.304	0.517	15.13	0.136	0.659	0.384	1.254	12.98	3.634	1.898	0.427	0.348	1.371	0.636485
ENSG00000141720	PIP4K2B	21.689	33.753	58.361	23.21	26.878	38.317	18.678	21.75	22.941	23.534	19.471	21.699	10.611	24.673	20.694	18.643	20.803	27.026	19.05	24.273	0.636422
ENSG00000137285	TUBB2B	513.71	507.489	2950.14	13.527	26.359	2.862	7.343	38.587	10.464	44.567	1.577	23.922	176.481	19.542	20.49	20.601	14.941	7.633	14.594	9.448	0.636269
ENSG00000101204	CHRNA4	0.757	0.353	2.656	0	0	0	0.098	0.1	0	0	0	0	0	0	0	0.099	0.009	0.04	0.027	0.006	0.636258
ENSG00000125107	CNOT1	55.957	85.603	39.053	57.307	29.335	58.162	65.509	57.571	51.92	33.72	52.331	37.991	48.173	31.657	38.176	41.135	28.642	23.532	21.312	14.233	0.636164
ENSG00000112539	C6orf118	0.144	0.915	2.553	0	0	0.004	0.01	0.169	0	0	0	0	0.089	0	0	0.01	0.008	0.001	0.166	0.058	0.635952
ENSG00000117906	RCN2	42.984	55.586	27.482	10.505	8.566	19.12	16.077	18.056	22.348	8.247	8.277	12.601	12.398	25.194	12.875	8.854	8.454	9.293	9.325	6.186	0.635903
ENSG00000138092	CENPO	13.342	18.783	15.763	15.771	25.635	10.655	6.944	7.509	5.486	11.554	5.653	15.96	0.778	10.035	18.408	1.318	2.386	1.562	3.827	1.795	0.635851
ENSG00000152193	RNF219	7.432	15.367	14.793	4.169	3.271	7.73	10.516	13.397	10.311	2.459	3.869	8.042	2.988	8.246	4.659	4.449	4.135	5.628	4.389	2.146	0.635769
ENSG00000230778	ANKRD63	0.088	0.028	0.706	0.02	0	0.312	0.143	0.127	0	0.048	0.02	0.006	0	0	0.021	0	0	0.039	0	0	0.635502
ENSG00000174448	STARD6	0.024	0.09	0.208	0.067	0.088	0.025	0.013	0.042	0.039	0	0.089	0.114	0	0.129	0	0.016	0	0	0	0	0.635414
ENSG00000122778	KIAA1549	7.743	6.686	27.913	4.222	3.375	4.514	1.572	2.372	0.922	3.75	0.073	1.788	2.347	0.617	2.964	5.397	0.658	1.073	0.735	5.768	0.635035
ENSG00000166881	TMEM194A	33.751	19.185	9.919	11.502	13.808	14.733	7.909	7.984	11.367	7.633	6.661	11.53	5.062	11.105	10.168	2.192	5.228	1.869	3.516	1.791	0.634894
ENSG00000136367	ZFHX2	4.328	5.717	10.509	0.493	0.272	0.636	0.702	1.138	0.033	0.113	0.128	0.045	2.897	0.022	0.143	2.343	0.314	0.215	0.304	1.922	0.634709
ENSG00000013810	TACC3	42.015	56.227	19.63	25.335	52.644	34.768	7.202	8.067	8.699	25.596	28.504	24.483	0.56	8.778	19.606	1.585	8.084	2.915	9.055	2.767	0.634339
ENSG00000139780	METTL21C	0.051	0	0.156	0.021	0	0.043	0.031	0.038	0.009	0	0	0	0	0	0	0	0	0.015	0	0.024	0.634264
ENSG00000137815	RTF1	39.081	34.76	37.438	16.333	13.398	27.45	20.686	20.299	23.406	3.165	22.434	22.773	15.443	28.332	15.997	13.219	18.632	13.646	19.85	10.322	0.634224
ENSG00000157833	FAM59B	6.888	7.747	33.977	1.189	1.559	0.444	0.54	1.149	0.065	3.785	0.809	0.158	0.894	0.897	2.819	1.518	1.265	0.417	0.992	1.538	0.634162
ENSG00000171792	C12orf32	27.236	32.223	31.596	22.08	28.945	13.042	10.969	10.516	12.652	19.061	10.247	24.234	2.558	18.963	23.625	9.557	16.797	2.199	15.057	8.257	0.634012
ENSG00000105737	GRIK5	19.43	17.281	47.091	0.413	0.134	18.231	0.369	2.42	0.091	0.021	0.508	0.061	3.963	0.116	0.749	9.94	3.424	0.346	0.944	6.682	0.634006
ENSG00000171320	ESCO2	4.555	5.234	2.079	0.938	2.344	0.523	2.089	2.1	0.95	1.272	0.067	2.354	0.02	1.855	0.888	0.06	0.319	0.01	1.157	0.013	0.633872
ENSG00000176208	ATAD5	14.942	11.607	4.243	1.038	3.29	8.072	3.691	3.54	1.457	0.741	2.316	2.711	0.434	2.081	0.627	0.395	1.027	0.271	0.514	0.364	0.633541
ENSG00000113649	TCERG1	36.113	25.373	24.268	13.244	13.579	29.05	15.642	17.662	14.179	3.727	17.729	14.114	23.576	10.396	16.059	8.606	11.719	5.434	6.345	15.237	0.63328
ENSG00000067715	SYT1	38.074	12.01	28.892	1.353	0.956	1.694	0.618	6.244	3.596	0.036	0.021	5.367	0.184	1.185	2.373	0.53	1.3	0.007	0.119	0.097	0.633021
ENSG00000105251	SHD	2.364	0.773	12.972	0	0	1.214	0.755	1.089	0	0	0.403	0.003	0.119	0.005	0	0.024	0.008	0.019	0.1	0.044	0.632902
ENSG00000148606	POLR3A	10.665	12.465	8.087	10.379	10.177	7.012	6.849	7.224	11.917	5.285	4.586	10.046	5.141	8.537	6.971	7.004	3.476	4.967	2.999	5.5	0.632812
ENSG00000204576	PRR3	5.53	7.601	23.119	14.375	6.282	8.872	4.97	5.909	2.595	8.482	5.909	2.971	10.759	6.853	9.596	5.075	3.628	1.681	4.414	5.883	0.632792
ENSG00000163462	TRIM46	6.579	4.151	28.372	4.433	2.336	9.935	0.238	1.328	1.473	1.071	1.367	1.26	0.502	0.998	7.284	3.925	0.529	0.029	0.641	1.766	0.632418
ENSG00000108468	CBX1	69.226	110.694	77.001	16.732	16.948	31.594	27.208	29.667	25.721	15.631	7.704	23.474	37.763	36.125	13.55	12.787	24.524	29.087	30.174	12.786	0.632083
ENSG00000135314	KHDC1	2.764	1.844	4.784	1.477	1.574	2.541	0.904	1.473	0.24	0.224	0.756	1.395	0.309	1.72	1.988	1.275	1.003	0.237	0.447	1.684	0.632004
ENSG00000111249	CUX2	1.885	1.89	10.2	0	0.001	0.032	0.091	1.044	0	0	0.501	0	0.089	0	0.001	0.042	0.05	0.001	0.765	0.088	0.631987
ENSG00000119866	BCL11A	6.106	4.522	30.31	0.439	0.421	12.91	4.035	4.894	0.803	0.71	2.862	0.562	0.593	0.005	0.02	1.366	3.732	1.924	0.557	1.866	0.63192
ENSG00000149926	FAM57B	21.878	16.119	105.281	0.113	0.166	0.101	0.269	1.949	0.005	0.125	0.023	0.05	0.079	0.019	0.206	3.498	0.091	0	0.066	1.101	0.631728
ENSG00000133083	DCLK1	7.525	9.431	34.366	0.254	0.036	0	0.263	3.48	0.012	0.35	0	0.132	0.203	0.449	0.073	0.308	1.509	1.864	1.239	2.15	0.631514
ENSG00000143157	POGK	12.762	17.529	17.945	12.557	9.021	20.401	12.654	13.022	10.712	9.734	14.359	10.816	17.301	10.763	8.745	13.186	9.427	5.884	10.197	7.314	0.631478
ENSG00000145386	CCNA2	61.024	83.1	31.75	30.55	28.746	5.833	15.669	15.162	15.735	19.559	2.053	43.304	0.412	23.471	24.402	0.36	5.996	0.425	7.66	1.201	0.631371
ENSG00000090447	TFAP4	15.228	19.964	22.778	15.096	15.834	7.923	8.673	8.296	5.657	18.856	5.789	8.524	6.079	3.201	3.132	13.079	6.414	1.887	8.134	13.903	0.631364
ENSG00000172020	GAP43	27.131	18.842	117.788	1.566	0.647	0.02	1.16	20.99	0	0.006	0.022	0.007	0.01	0.791	0.031	7.749	2	1.682	1.33	0.503	0.631224
ENSG00000128944	C15orf23	15.692	17.346	17.236	19.729	6.849	3.795	4.835	5.036	12.278	6.339	1.377	16.212	4.941	9.281	7.854	1.855	4.097	4.562	8.193	2.143	0.631198
ENSG00000183798	EMILIN3	3.689	3.004	5.951	6.368	4.425	0	4.925	6.444	0	0.051	0.055	0.029	0.326	0.04	0.281	0.232	1.177	1.942	0.663	0.501	0.631097
ENSG00000092964	DPYSL2	51.801	62.015	213.693	88.022	83.405	12.279	15.93	20.915	16.758	33.14	15.959	80.68	45.998	99.211	50.251	25.545	15.122	18.905	12.658	7.216	0.63109
ENSG00000189369	GSPT2	18.035	24.605	11.747	6.206	4.516	9.729	8.553	7.386	2.854	3.137	3.956	2.142	4.026	4.77	2.195	7.83	3.537	5.313	4.425	2.878	0.630956
ENSG00000108947	EFNB3	16.716	17.033	41.175	1.651	1.49	0.066	1.383	4.921	3.343	18.148	0	4.125	4.359	1.583	3.078	9.818	0.907	0.271	0.481	1.423	0.630847
ENSG00000130559	CAMSAP1	11.341	18.6	30.477	10.77	8.044	9.354	4.039	5.727	5.166	7.438	7.757	5.54	7.948	4.272	6.418	5.98	13.392	10.192	4.809	6.986	0.630685
ENSG00000165185	KIAA1958	5.733	8.684	11.476	0.579	0.365	1.901	3.792	3.491	0.357	0.885	2.143	0.324	1.195	0.258	0.537	3.449	0.773	1.138	3.61	1.564	0.630602
ENSG00000162419	GMEB1	7.49	7.184	5.981	3.125	4.192	5.668	5.564	4.759	3.159	3.22	6.526	3.667	6.819	3.548	3.519	2.133	3.255	2.949	4.098	2.836	0.6304
ENSG00000186288	PABPC1L2A	0.72	0.255	0.556	0	0.005	0.005	0.004	0.025	0	0	0	0	0.004	0	0	0	0.011	0	0	0	0.630263
ENSG00000079616	KIF22	50.67	59.383	50.249	40.386	47.549	18.703	18.593	16.292	23.187	45.834	25.6	42.598	7.724	13.527	36.376	6.973	22.011	12.835	29.111	21.045	0.630207
ENSG00000169184	MN1	1.601	12.09	62.496	2.944	4.232	8.162	1.839	3.95	2.959	1.704	2.699	3.364	0.744	3.183	1.917	0.872	2.832	3.181	0.789	1.286	0.629994
ENSG00000145908	ZNF300	9.592	10.3	19.415	5.035	1.869	6.836	6.586	7.941	4.288	0.402	2.237	2.393	3.369	3.218	3.418	1.301	8.299	1.024	1.758	8.917	0.629984
ENSG00000101236	RNF24	8.927	10.868	28.696	39.465	28.93	27.15	3.58	3.972	3.792	10.37	16.382	4.402	15.272	16.976	3.073	3.497	3.501	3.611	2.827	1.678	0.62998
ENSG00000152253	SPC25	19.427	24.788	12.674	6.578	11.06	1.165	3.324	3.523	2.835	7.827	0.284	6.243	0.026	7.101	7.194	3.857	2.133	0.07	5.08	0.785	0.62986
ENSG00000105202	FBL	367.54	278.746	263.314	227.017	307.496	330.809	105.846	106.51	167.714	249.615	126.782	307.58	218.062	117.047	212.854	69.702	115.692	68.741	167.65	86.308	0.629812
ENSG00000171960	PPIH	20.148	14.857	15.639	13.524	15.196	14.633	11.802	12.108	20.139	14.754	10.136	16.701	8.305	10.27	13.46	7.074	11.023	6.612	12.177	5.93	0.62979
ENSG00000170382	LRRN2	1.808	4.74	13.718	0.008	0	0.856	1.285	2.31	0.001	0	3.631	0	0.542	0	0	1.67	0.628	0.722	0.045	0.694	0.629734
ENSG00000158321	AUTS2	12.012	20.134	22.17	2.457	3.739	3.584	8.897	10.137	1.158	8.445	13.531	0.774	6.498	0.445	0.215	3.698	6.341	1.356	3.683	8.6	0.629667
ENSG00000130055	GDPD2	16.219	13.504	9.009	0.013	0.04	0.134	4.25	10.575	8.602	0.002	0	0.13	0	0.005	0.09	0.036	0.195	0.015	0.048	0.06	0.62947
ENSG00000170540	ARL6IP1	258.94	152.04	279.27	73.372	26.642	87.844	143.36	150.179	97.681	119.979	63.214	102.954	110.932	113.188	157.757	102.268	59.328	24.122	61.159	50.421	0.629069
ENSG00000008277	ADAM22	5.377	2.632	5.217	0.296	0.222	3.873	3.617	2.568	0.008	0.181	0.57	0.014	0.151	0.065	0.114	2.317	0.793	0.239	0.063	0.392	0.628987
ENSG00000161800	RACGAP1	11.977	20.15	34.225	25.923	20.771	4.732	8.221	8.376	20.986	18.901	1.562	28.451	1.852	19.202	9.224	1.375	4.816	2.168	11.207	0.908	0.628816
ENSG00000112280	COL9A1	4.393	3.602	3.574	0.003	0	0.009	1.069	1.533	0	0	0.032	0.002	0.012	0	0	0.093	1.162	0.091	0.155	0.344	0.628733
ENSG00000138658	C4orf21	8.07	6.898	3.228	0.859	1.474	3.126	1.917	1.933	0.875	0.45	2.526	1.393	0.593	1.186	0.765	0.834	1.228	0.401	0.436	0.947	0.628722
ENSG00000167992	VWCE	7.818	3.686	6.157	0.975	1.968	3.333	0.536	1.672	0.18	0.203	0.135	0.142	1.224	0.216	3.903	1.037	0.339	0.201	0.393	0.892	0.628674
ENSG00000172461	FUT9	2.403	2.066	6.997	0	0	0	0.004	0.007	0.004	0	0	0	0	0.002	0	0.345	0.047	0	0.602	0.715	0.628663
ENSG00000099625	C19orf26	5.411	5.183	16.377	8.596	9.908	0.054	0.176	0.72	0.731	6.886	0.028	0.645	1.703	0.298	1.937	5.833	0.668	0.907	0.227	2.099	0.628626
ENSG00000091656	ZFHX4	0.497	1.783	10.459	2.336	3.333	0.001	0.192	1.78	0.422	0.045	0.005	0.128	0.078	0.895	0.162	0.457	1.712	0.264	0.481	0.137	0.628437
ENSG00000183831	ANKRD45	0.751	1.028	1.417	0.056	0.037	0.12	0.052	0.141	0.067	0.017	0	0.011	0.115	0.15	0.106	0.501	0.065	0.036	0.133	0.099	0.62839
ENSG00000128596	CCDC136	5.758	6.02	12.296	1.239	0.844	5.824	0.887	1.979	0.337	0.593	1.433	0.607	0.695	2.37	0.48	0.331	3.641	3.627	1.342	1.045	0.628018
ENSG00000184524	CEND1	1.263	1.363	28.258	5.302	4.53	0.165	0.151	1.374	0	1.076	0.151	0.009	0.028	0.402	0.192	0.185	0.589	0.336	0.078	0.459	0.627022
ENSG00000183496	MEX3B	6.13	14.311	53.507	1.478	1.541	16.933	1.686	3.3	0.136	3.41	0.826	0.657	10.261	1.581	10.901	2.185	1.286	3.059	0.547	1.143	0.626749
ENSG00000205318	GCNT6	0.322	0.043	0.711	0	0	0.219	0.219	0.224	0.034	0.055	0.077	0	0.016	0.013	0.05	0.05	0.03	0.024	0.11	0.016	0.626459
ENSG00000198908	BHLHB9	4.96	6.239	7.718	1.594	0.928	2.391	4.694	5.389	2.08	0.285	0.415	1.144	1.044	3.463	1.695	3.578	1.511	1.547	1.436	1.022	0.626319
ENSG00000154429	C1orf96	9.914	4.101	23.039	1.232	0.895	5.449	2.524	3.105	3.724	2.071	9.285	3.081	2.527	2.861	1.133	3.083	2.437	1.02	1.893	2.703	0.625895
ENSG00000124479	NDP	0.213	0.621	4.939	0.854	1.21	0	0.11	0.228	0.028	0.055	0	0.024	0.023	0.837	0.181	0.013	0.221	0.061	0.247	0.057	0.625748
ENSG00000049618	ARID1B	8.587	13.529	38.047	11.982	10.937	20.719	10.156	10.833	4.723	10.942	18.839	6.84	8.73	4.872	7.542	14.031	8.591	6.999	6.238	8.5	0.625057
ENSG00000101146	RAE1	6.545	12.488	15.127	12.181	10.661	10.178	8.035	7.626	8.742	8.471	10.392	9.942	17.628	8.154	8.383	6.39	5.077	5.892	5.777	4.336	0.624979
ENSG00000182601	HS3ST4	1.564	2.361	3.701	0	0	0	0.221	0.251	0	0	0	0	0.362	0	0	0.038	0.124	0	1.242	0.217	0.624961
ENSG00000125686	MED1	21.481	23.555	13.364	26.06	11.878	22.637	13.051	12.8	19.453	8.973	12.467	16.098	18.376	19.487	13.307	9.258	6.906	8.363	6.968	4.315	0.62478
ENSG00000163960	UBXN7	13.758	17.613	18.047	7.968	3.803	21.845	18.142	16.222	10.203	3.226	15.433	7.667	7.02	12.641	5.649	6.463	6.772	5.407	6.782	5.849	0.624737
ENSG00000117139	KDM5B	39.271	39.113	33.084	11.132	3.48	46.787	15.82	15.758	34.078	7.42	9.78	21.009	24.294	21.008	14.824	9.876	9.776	2.982	6.113	5.079	0.624619
ENSG00000132604	TERF2	12.38	17.8	18.808	14.053	13.448	24.939	11.639	11.661	9.815	10.005	10.104	10.842	16.364	11.963	8.396	14.397	8	8.656	9.132	8.112	0.624498
ENSG00000180998	GPR137C	1.463	1.22	6.372	0.146	0.46	0.355	0.889	1.898	0.023	0.275	0.042	0.169	0.159	0.241	1.019	0.08	0.247	0.678	0.247	0.328	0.624363
ENSG00000159164	SV2A	60.886	31.606	35.502	24.979	18.238	21.184	1.203	3.167	0.345	23.375	1.674	1.006	5.692	22.872	2.939	20.759	2.988	0.278	1.432	3.97	0.624358
ENSG00000175414	ARL10	3.487	3.431	14.165	3.405	2.351	7.726	1.592	3.435	1.093	2.274	2.039	1.188	1.757	2.191	3.906	2.559	2.986	1.961	0.753	2.067	0.624296
ENSG00000198826	ARHGAP11A	18.879	31.231	9.932	11.579	8.564	8.178	7.247	7.025	5.422	5.016	2.093	8.476	0.202	10.233	5.858	1.041	3.347	0.498	8.576	3.338	0.624214
ENSG00000197457	STMN3	29.596	42.715	103.997	9.229	47.547	66.829	3.834	13.031	8.781	23.808	21.672	14.938	7.256	11.976	6.404	31.022	16.388	5.072	16.439	24.995	0.62418
ENSG00000187260	WDR86	2.404	3.354	11.946	0.416	0.006	3.098	2.93	4.821	0	0.019	4.456	0	1.114	0.003	0.003	0.336	0.806	0.036	2.655	0.838	0.623636
ENSG00000102098	SCML2	7.177	14.303	8.777	1.388	1.518	16.006	2.73	3.217	0.483	0.701	0.407	0.441	1.657	1.376	0.705	2.202	1.059	0.973	0.414	0.676	0.623612
ENSG00000099956	SMARCB1	36.505	77.99	195.794	86.11	84.332	40.267	34.614	32.793	48.481	110.342	27.696	69.092	52.09	43.978	82.371	41.053	24.689	32.442	36.743	29.201	0.623515
ENSG00000099365	STX1B	4.93	2.802	30.418	2.243	1.885	0.562	0.453	1.059	0.404	0.83	0.96	0.776	0.246	1.425	0.174	0.324	0.77	0.186	0.427	1.666	0.62334
ENSG00000187672	ERC2	1.804	1.833	5.058	0.148	0.049	0.008	0.607	0.602	0.02	0	0	0.039	0.527	0.021	0.702	0.579	0.061	0.153	0.407	0.719	0.623297
ENSG00000105894	PTN	70.286	117.143	242	6.727	8.426	0.012	32.599	63.148	0.018	0.301	0	2.992	11.457	60.193	0.085	1.859	79.516	6.345	2.372	0.735	0.623038
ENSG00000178233	TMEM151B	3.8	1.779	17.407	0.086	0.001	0.758	0.93	1.683	0.005	0.029	0.601	0.007	0.437	0.001	0.018	0.556	0.165	0.386	0.131	0.716	0.622796
ENSG00000080986	NDC80	22.858	32.825	12.328	13.962	7.895	3.521	7.106	6.759	5.212	2.68	3.978	15.724	0.075	11.043	4.409	0.179	6.577	0.284	4.668	0.848	0.622589
ENSG00000120802	TMPO	32.781	65.81	25.251	16.443	17.43	38.535	29.256	26.986	9.751	9.033	17.147	15.848	6.094	16.463	11.693	6.524	16.059	5.833	17.29	13.293	0.622347
ENSG00000198056	PRIM1	26.573	31.627	11.652	6.22	5.433	22.742	5.233	4.638	4.013	4.896	2.733	8.503	1.099	5.797	3.838	3.51	2.737	1.8	4.204	2.294	0.622004
ENSG00000089094	KDM2B	10.251	13.318	9.478	4.096	4.321	5.68	2.314	3.045	2.078	3.433	11.717	2.253	1.018	2.207	3.164	1.911	3.739	1.373	2.505	4.632	0.621442
ENSG00000185742	C11orf87	0.424	0.889	4.713	0.038	0.028	0.004	0.009	0.181	0.18	0.007	0	0.231	0.002	0.141	0	0.153	0.011	0.02	0.011	0.036	0.621377
ENSG00000161692	DBF4B	6.047	5.301	6.889	8.697	4.523	3.82	2.156	2.716	1.466	6.12	1.317	3.269	0.63	1.332	5.556	1.131	2.283	1.182	1.389	3.601	0.621014
ENSG00000137252	HCRTR2	0.226	0.084	1.073	0	0	0	0.062	0.077	0	0	0	0	0.005	0.008	0	0.004	0	0.036	0	0	0.620963
ENSG00000198521	ZNF43	21.102	15.333	12.5	1.37	1.913	12.454	9.52	8.214	1.83	0.44	6.118	0.822	4.343	3.243	2.508	5.513	2.709	1.91	2.612	2.99	0.620902
ENSG00000138363	ATIC	62.852	71.472	17.979	52.22	48.023	43.129	34.542	31.973	36.752	39.302	11.646	42.969	19.101	24.67	8.433	15.896	13.36	18.561	20.018	13.256	0.620811
ENSG00000147402	GABRQ	6.761	3.211	4.174	0.141	0.131	0	0.063	0.281	0.074	0.075	0	0.007	0.043	0.008	0.011	0.025	0.259	0.005	0.021	0	0.62076
ENSG00000072315	TRPC5	0.392	0.115	0.563	0	0.002	0.056	0.007	0.007	0.03	0	0.174	0	0	0.013	0	0.094	0.006	0	0.022	0.022	0.620646
ENSG00000161021	MAML1	10.733	15.922	17.791	9.968	8.519	9.406	10.891	11.087	2.466	8.068	13.744	3.381	13.484	3.162	6.783	8.531	7.598	5.111	6.685	8.467	0.620477
ENSG00000100281	HMGXB4	15.281	16.93	11.056	10.246	9.636	5.786	6.716	7.03	11.01	4.105	9.736	8.803	7.009	14.797	7.425	5.888	5.81	3.697	6.296	4.024	0.620305
ENSG00000205143	ARID3C	0.054	0.21	0.638	0.082	0.11	0.018	0.045	0.107	0.041	0.054	0.032	0.041	0.09	0.026	0.064	0.031	0.058	0.007	0	0.17	0.620204
ENSG00000198830	HMGN2	118.356	225.394	373.296	81.722	136.8	144.563	127.188	120.122	32.281	75.294	80.046	50.734	43.073	104.214	62.095	102.622	126.033	37.332	167.31	90.525	0.619906
ENSG00000213186	TRIM59	11.534	13.294	7.469	5.279	3.256	22.789	8.567	8.498	2.141	0.863	5.635	1.668	0.475	5.091	2.802	0.857	1.42	0.124	0.566	0.54	0.61956
ENSG00000078295	ADCY2	7.111	8.389	4.476	0.022	0.023	0.255	0.612	0.711	0.003	0.379	0.004	0.001	0.015	0.012	0.005	0.247	0.612	0.008	0.318	0.144	0.619281
ENSG00000127946	HIP1	31.861	40.556	33.171	9.336	8.661	10.478	1.944	3.349	4.898	7.116	8.38	6.535	7.021	21.923	18.378	4.944	7.061	7.305	4.595	4.95	0.619226
ENSG00000120685	PROSER1	53.99	31.978	27.347	29.031	17.343	20.188	19.727	17.28	9.218	18.563	29.721	8.76	20.601	7.105	30.297	17.419	5.421	5.313	8.589	8.599	0.61865
ENSG00000198920	KIAA0753	8.243	11.258	12.78	11.141	5.411	15.325	7.666	8.213	6.982	1.552	3.559	3.271	5.967	3.454	4.563	6.424	7.07	2.858	5.19	7.408	0.618582
ENSG00000103160	HSDL1	20.836	28.642	35.517	7.114	2.74	8.27	10.623	11.204	12.056	10.795	7.086	8.94	4.927	14.218	13.215	10.043	8.574	11.929	7.308	8.025	0.618511
ENSG00000111247	RAD51AP1	19.813	28.732	8.615	7.352	5.957	4.958	6.602	6.382	4.737	2.266	0.797	9.02	0.192	9.091	4.388	0.337	1.904	0.336	5.059	0.173	0.618464
ENSG00000136492	BRIP1	9.213	14.15	3.593	1.699	4.216	4.608	4.238	3.958	2.417	1.869	0.792	5.565	0.423	6.102	1.705	0.093	0.593	0.037	0.698	0.205	0.618301
ENSG00000164105	SAP30	9.546	13.839	40.187	12.691	18.322	21.904	5.127	4.999	5.481	12.048	9.721	7.951	7.129	18.438	8.118	10.143	8.081	9.425	10.368	2.99	0.618011
ENSG00000105642	KCNN1	3.839	2.84	25.187	0.025	0.042	0.039	0.19	0.485	0.006	1.404	0.023	0.036	0.34	0.001	0.121	0.219	0.065	0.025	0	0.172	0.617724
ENSG00000167005	NUDT21	64.49	97.776	46.788	26.407	26.504	79.351	48.207	63.838	28.94	19.882	20.029	28.657	26.975	44.15	18.725	22.118	24.526	20.625	30.357	12.532	0.617667
ENSG00000149554	CHEK1	17.805	23.108	5.771	5.678	4.122	6.915	5.38	5.142	6.021	3.752	1.137	7.8	1.647	7.519	4.139	0.638	1.416	0.297	2.49	0.615	0.617652
ENSG00000178966	RMI1	16.847	22.346	8.15	6.241	4.272	9.894	7.615	6.862	1.029	3.393	1.133	0.698	0.702	1.158	0.573	4.347	2.822	2.834	4.828	2.787	0.617565
ENSG00000171316	CHD7	13.806	26.231	42.246	0.3	0.298	0.443	8.234	9.359	2.905	1.794	11.578	2.775	7.642	0.189	3.434	8.808	3.148	5.082	2.754	6.944	0.616589
ENSG00000249853	HS3ST5	2.749	0.947	1.982	0.167	0.213	0.009	0.297	1.323	0	0.012	0.006	0.004	0	0.012	0	0.066	0.328	0.002	0.016	0.115	0.616573
ENSG00000184408	KCND2	6.508	3.472	4.73	0.013	0.047	0.016	0.15	1.477	0.006	0	0	0	0.039	1.885	0.007	0.297	0.118	0.003	0.093	0.203	0.616549
ENSG00000076650	GPATCH1	5.666	6.096	8.492	6.577	3.412	5.975	6.964	6.383	4.69	1.174	3.98	4.462	4.128	4.362	3.136	4.774	4.858	3.152	3.203	5.118	0.616349
ENSG00000215475	SIAH3	0.154	0.036	1.751	0.023	0.012	0.616	0.049	0.161	0.182	0.012	0.16	0	0.005	0	0.022	0.013	0.019	0.006	0	0.026	0.616316
ENSG00000187398	LUZP2	0.667	0.532	3.813	0.007	0.002	0.001	0.14	0.929	0.01	0.012	0	0	0.44	0.054	0.002	0.028	0.166	0.047	0.044	0.024	0.616314
ENSG00000116698	SMG7	22.844	22.107	31.439	32.218	18.363	31.522	19.433	19.094	21.449	11.208	24.917	23.94	19.045	15.047	17.328	27.935	11.431	13.83	12.767	12.357	0.616292
ENSG00000145864	GABRB2	0.607	2.078	1.971	0	0	0.004	1.88	1.714	0	0	0.005	0	0.001	0.009	0	0.166	0.046	0.011	0.121	0.033	0.616004
ENSG00000128694	OSGEPL1	5.859	6.399	3.523	3.703	1.489	5.42	4.251	4.411	4.222	1.91	1.888	2.657	0.697	2.759	1.498	2.276	2.228	2.903	1.602	1.678	0.615902
ENSG00000125249	RAP2A	20.147	22.819	42.62	7.205	4.271	20.755	18.721	17.197	16.683	11.662	7.83	14.726	10.557	21.892	9.395	6.683	13.603	13.402	15.255	4.832	0.615796
ENSG00000109265	KIAA1211	5.953	6.424	67.778	0.582	0.283	16.336	24.34	21.966	0.006	6.501	0.067	0.023	0.061	0.308	0.622	7.189	0.379	0.02	2.189	0.742	0.615744
ENSG00000162624	LHX8	0.806	0.193	0.935	0	0	0	0	0	0	0	0	0	0	0.005	0	0	0.112	0	0	0.011	0.615735
ENSG00000102710	FAM48A	12.762	11.108	14.301	13.021	4.541	19.174	9.493	9.251	11.879	2.562	6.788	6.651	9.061	9.165	10.123	7.583	5.582	3.733	5.855	5.858	0.615563
ENSG00000072501	SMC1A	30.54	28.47	21.403	12.213	21.655	26.124	14.215	15.019	14.499	6.541	17.311	25.639	17.481	15.971	10.856	10.876	12.224	15.256	9.714	9.158	0.615111
ENSG00000155561	NUP205	47.246	57.691	21.762	20.236	15.832	22.321	14.234	14.867	35.342	15.687	14.648	32.195	21.321	18.264	20.149	11.67	8.693	5.654	6.278	4.506	0.61511
ENSG00000136928	GABBR2	1.592	0.72	10.953	0.514	0.789	0	0.457	0.35	0.003	0.012	0.008	0.008	0.008	0.367	0.887	0.061	0.02	0.068	0.086	0.061	0.61508
ENSG00000077312	SNRPA	162.236	127.931	141.202	123.172	139.114	77.758	38.581	38.916	37.772	150.744	53.299	83.886	99.354	39.149	83.705	36.638	57.743	23.582	87.564	49.385	0.614688
ENSG00000183117	CSMD1	0.61	0.163	1.069	0.002	0	0.059	0.088	0.075	0	0.001	0.291	0.004	0.159	0.224	0.012	0.05	0.052	0.008	0.042	0.052	0.614661
ENSG00000163918	RFC4	23.933	37.227	12.866	8.292	10.437	11.163	6.295	6.434	5.423	4.93	2.608	8.163	6.17	5.951	2.068	3.311	6.549	5.387	6.789	4.126	0.614551
ENSG00000133740	E2F5	11.211	17.572	6.277	1.639	0.329	9.441	6.728	8.259	1.444	0.63	2.538	1.225	3.196	0.777	0.925	2.168	0.574	0.902	2.356	1.216	0.614464
ENSG00000073792	IGF2BP2	82.898	62.375	18.779	112.14	66.715	34.061	41.452	37.049	6.085	5.484	3.546	2.715	1.464	2.335	5.399	2.765	2.385	10.345	8.334	7.354	0.614414
ENSG00000164221	CCDC112	16.582	7.976	38.134	4.367	1.627	9.244	2.063	3.504	2.236	0.328	3.564	1.376	1.208	3.186	1.875	5.442	3.418	3.141	4.444	6.907	0.61416
ENSG00000126773	C14orf135	7.822	9.37	17.652	16.299	6.946	20.559	11.245	11.819	9.2	5.629	5.213	5.003	9.524	12.139	5.959	9.293	4.676	7.231	3.548	5.403	0.613974
ENSG00000186638	KIF24	1.665	4.162	3.078	2.661	4.681	1.217	1.514	1.507	1.468	2.745	0.451	3.626	0.347	1.396	2.282	0.64	0.819	0.45	0.51	0.669	0.613853
ENSG00000156735	BAG4	19.465	17.89	6.129	6.508	6.457	7.971	11.101	10.228	6.054	4.515	9.722	5.294	5.622	7.037	3.902	4.126	3.815	3.112	4.698	2.759	0.613715
ENSG00000112592	TBP	17.882	14.444	16.265	11.245	14.143	14.874	12.34	13.132	13.254	6.453	13.867	16.45	14.516	10.562	15.612	10.462	8.414	6.565	8.292	9.907	0.613515
ENSG00000001497	LAS1L	12.236	16.866	18.472	12.651	14.177	15.585	8.093	8.815	17.116	9.53	14.004	14.715	13.273	7.289	11.656	7.282	10.681	6.432	8.395	14.107	0.613465
ENSG00000105278	ZFR2	1.511	2.317	2.714	0.002	0.007	0.01	0.027	0.302	0.002	0.009	0.164	0	0.176	0.002	0.009	1.038	0.016	0.014	0.023	0.367	0.613413
ENSG00000110675	ELMOD1	0.437	0.42	2.783	0.103	0.164	0	0.035	0.141	0.176	0	0	0.02	0.033	0.288	0.468	0.01	0.018	0.115	0	0.004	0.61319
ENSG00000100206	DMC1	1.816	1.753	0.443	0.793	0.719	0.818	0.66	0.594	0.084	0.137	0.039	0.072	0.049	0.496	0.158	0.055	0.37	0.102	0.433	0.054	0.61256
ENSG00000107643	MAPK8	7.634	9.692	21.52	3.604	2.056	13.627	6.634	7.103	4.282	1.401	8.649	2.977	7.589	5.056	6.263	5.946	4.968	3.073	5.179	3.483	0.612557
ENSG00000162521	RBBP4	69.972	116.669	90.191	23.836	39.424	66.068	43.357	43.25	22.73	40.944	29.288	25.779	40.588	44.39	27.924	47.433	40.323	30.549	45.742	34.044	0.612422
ENSG00000040275	CCDC99	16.785	19.695	5.529	11.627	6.238	5.421	4.838	4.729	6.637	1.52	1.402	6.791	1.953	8.067	5.308	1.738	2.619	2.315	3.052	1.436	0.612085
ENSG00000082684	SEMA5B	8.981	16.016	95.206	0	0	0	1.085	1.576	0.042	0	0.022	0.068	0.007	0	0.002	0.18	0.463	1.887	0.155	2.799	0.611993
ENSG00000131711	MAP1B	26.366	66.634	236.422	91.203	65.982	0.061	2.9	20.818	4.1	0.752	0.177	4.263	29.24	75.303	26.712	46.219	14.671	22.46	3.935	4.516	0.611951
ENSG00000092470	WDR76	8.042	10.916	8.329	4.513	16.265	7.349	2.249	2.649	2.076	4.852	2.622	5.884	1.217	7.77	2.534	1.224	2.598	1.468	3.864	1.278	0.611746
ENSG00000163655	GMPS	32.564	49.912	17.034	20.727	22.787	28.184	13.112	13.627	14.327	17.093	12.067	24.516	14.533	24.368	6.909	14.635	8.247	10.1	11.652	5.911	0.61149
ENSG00000169679	BUB1	32.341	52.62	15.339	13.79	7.421	3.53	7.094	6.055	7.806	6.328	0.568	20.507	0.042	10.717	7.956	0.105	1.172	0.2	1.492	0.045	0.611485
ENSG00000113657	DPYSL3	118.436	155.633	752.455	15.48	16.232	37.688	7.574	52.534	3.255	0.901	0.073	11.387	3.891	64.032	58.636	4.504	86.116	11.564	18.354	6.221	0.611426
ENSG00000204977	TRIM13	9.32	8.752	14.813	4.346	2.29	8.307	7.876	8.894	6.111	3.213	7.005	2.922	4.106	5.837	4.072	5.707	7.633	4.543	4.114	4.535	0.611227
ENSG00000021574	SPAST	15.518	17.787	16.791	3.454	1.491	16.148	18.627	16.891	5.154	1.839	6.466	3.986	4.613	6.697	3.676	7.981	5.011	3.681	3.819	3.685	0.611091
ENSG00000156802	ATAD2	9.093	14.087	13.38	5.222	9.616	10.06	7.678	7.774	5.778	3.898	7.014	12.85	11.087	12.149	5.051	2.949	5.282	4.12	7.499	2.263	0.610955
ENSG00000105255	FSD1	28.518	34.103	26.911	13.794	15.302	0.923	0.511	2.288	0.639	8.207	3.235	1.671	0.477	3.537	31.846	0.009	0.462	0.028	0.419	0.004	0.610932
ENSG00000213390	ARHGAP19	4.759	7.851	45.046	1.995	1.916	2.553	4.275	5.337	1.768	1.189	3.45	2.546	5.917	2.235	2.674	5.198	1.31	0.833	1.454	1.264	0.610846
ENSG00000164199	GPR98	3.823	4.024	23.945	0.002	0.003	0.071	0.431	0.399	0.006	0.006	0.079	0.002	0.371	0.007	0.01	1.969	0.127	0.004	0.078	0.588	0.610828
ENSG00000090924	PLEKHG2	14.856	17.57	32.533	21.529	26.525	9.09	3.69	5.736	2.559	9.531	19.299	4.041	9.005	5.085	19.711	13.066	6.121	4.044	4.628	8.134	0.610757
ENSG00000117016	RIMS3	7.178	8.268	7.996	0.087	0.087	0.529	0.799	4.753	1.746	0.855	1.136	3.058	0.566	0.067	0.096	0.55	1.754	0.269	2.846	0.591	0.610748
ENSG00000051341	POLQ	4.696	5.463	1.573	1.878	2.454	1.881	2.263	2.125	1.68	0.874	0.248	2.939	0.011	1.731	1.133	0.045	2.044	0.101	0.403	0.059	0.610376
ENSG00000258405	ZNF578	2.461	0.804	2.773	0.523	0.325	0.404	0.991	0.956	0.639	0.051	0.178	0.121	0.317	0.964	0.286	0.504	0.438	0.745	0.201	0.515	0.609935
ENSG00000137073	UBAP2	14.797	12.551	14.508	14.171	18.405	8.9	6.88	6.407	6.034	15.014	6.317	6.957	8.396	3.652	12.724	9.125	5.772	4.686	5.042	6.895	0.609759
ENSG00000181544	FANCB	3.74	4.526	1.095	0.979	1.821	1.866	0.933	0.877	1.738	0.805	0.623	2.439	0.367	1.56	0.73	0.152	0.49	0.198	0.321	0.088	0.609712
ENSG00000124214	STAU1	52.667	58.793	52.164	51.483	50.713	35.815	63.671	59.022	40.916	35.406	35.065	36.184	49.465	49.118	40.971	40.655	30.944	29.879	48.536	27.762	0.609498
ENSG00000160469	BRSK1	14.084	12.913	64.079	6.658	3.086	2.099	1.77	4.582	0.289	2.497	0.714	0.178	7.894	1.9	0.129	10.583	3.436	0.96	2.191	5.414	0.609429
ENSG00000181218	HIST3H2A	10.514	47.708	98.061	17.611	7.693	62.403	10.248	14.718	5.139	50.967	6.152	5.085	11.285	1.993	17.263	7.646	17.598	14.62	14.617	3.623	0.609083
ENSG00000073050	XRCC1	18.478	29.98	61.915	34.659	42.691	33.15	26.753	26.498	17.354	39.834	18.265	22.498	12.166	10.758	26.368	23.047	22.124	16.702	22.513	27.798	0.608213
ENSG00000156970	BUB1B	44.392	51.921	15.738	12.572	8.563	2.88	6.686	6.424	6.989	4.46	0.494	15.368	0.069	9.986	8.407	0.175	2.226	0.062	2.108	0.178	0.608181
ENSG00000157212	PAXIP1	10.522	10.864	4.179	3.451	4.486	4.445	4.12	3.981	3.508	2.455	3.663	3.455	3.122	2.173	4.393	2.402	2.593	1.6	2.816	2.708	0.608036
ENSG00000196465	MYL6B	26.127	28.312	70.066	20.048	26.133	20.416	8.176	9.72	12.557	33.244	1.314	12.551	4.623	19.977	38.244	14.431	7.741	8.536	13.529	10.376	0.607898
ENSG00000144730	IL17RD	37.182	52.169	23.726	2.476	1.908	0.007	0.891	2.859	1.281	1.004	0.005	3.869	9.868	1.441	0.237	0.477	2.181	1.833	0.411	0.747	0.607887
ENSG00000008197	TFAP2D	0.001	0.017	0.069	0	0	0	0	0	0	0	0	0	0	0	0	0.004	0	0	0	0	0.607759
ENSG00000164853	UNCX	0.018	0.169	0.097	0	0	0	0	0	0	0	0	0	0	0	0	0	0	0	0	0	0.607499
ENSG00000046653	GPM6B	71.573	31.425	124.036	16.952	7.095	1.58	2.433	5.257	0.073	79.385	0.844	48.005	9.227	1.704	0.028	1.447	3.956	2.09	1.166	0.545	0.607397
ENSG00000080572	CXorf41	0.003	0.008	0.029	0	0	0	0.004	0.005	0.003	0	0	0	0.01	0	0	0	0.004	0	0	0	0.607387
ENSG00000084710	EFR3B	1.419	3.595	8.14	0.017	0.055	0.126	0.99	1.984	0.056	3.696	0.073	0.011	0.081	0.066	0.105	1.069	0.167	0.889	0.208	0.421	0.607163
ENSG00000152382	TADA1	7.316	15.821	21.945	4.731	3.531	14.005	8.857	9.468	8.441	5.227	9.984	7.136	11.617	7.038	5.489	8.888	7.229	5.622	7.669	4.032	0.606956
ENSG00000121211	MND1	18.044	14.298	5.203	3.546	4.369	2.589	2.523	2.353	1.212	1.226	0.167	2.452	0.191	2.115	0.316	0.346	1.479	0.159	2.389	0.093	0.606926
ENSG00000183715	OPCML	0.824	0.904	6.637	0.095	0.123	0	0.87	0.796	0.037	0.012	0	0.309	0	0.42	0.001	0.722	0.032	0.016	0.051	0.142	0.606885
ENSG00000163535	SGOL2	17.07	19.258	4.735	4.288	3.453	4.842	2.988	3.563	3.196	0.57	0.533	4.322	0.296	5.815	0.942	0.405	1.091	0.745	1.258	0.212	0.606828
ENSG00000203784	LELP1	0.012	0	0.027	0	0	0	0	0	0.01	0	0	0	0	0	0	0	0	0	0	0	0.606479
ENSG00000184258	CDR1	0	0	5.854	1.835	0.005	0	0.634	1.23	0	0.348	0.057	0	0	0.009	0	0	0.044	0.063	0	0.065	0.606326
ENSG00000138668	HNRNPD	108.176	103.863	58.657	44.803	59.368	94.982	50.668	55.297	14.888	27.714	49.36	9.856	48.861	12.797	19.343	31.796	40.534	24.835	36.829	42.306	0.606222
ENSG00000176076	KCNE1L	3.804	1.513	25.536	0.219	0.31	0.429	0.967	0.483	0.282	0.147	0.232	0.285	0.78	0.208	0.243	0.045	0.148	0.31	0.264	0.018	0.606033
ENSG00000189091	SF3B3	40.117	60.074	45.703	67.977	84.363	43.716	36.657	34.461	31.037	55.575	22.584	39.625	56.04	39.785	36.515	31.845	27.854	19.392	16.392	15.339	0.60576
ENSG00000088247	KHSRP	166.123	165.422	77.052	127.04	162.756	68.328	66.721	61.945	24.218	150.12	45.419	44.125	66.094	25.392	40.008	48.845	44.701	32.016	49.367	43.456	0.605555
ENSG00000109576	AADAT	5.075	11.093	18.335	5.713	3.743	11.507	9.848	15.903	2.623	1.956	0.032	5.196	0.166	4.602	1.577	5.308	2.981	0.786	3.075	7.448	0.605495
ENSG00000075043	KCNQ2	16.016	12.623	50.362	0	0	0.014	0.161	1.293	0.012	0.006	0	0	0.004	0.004	0.011	10.78	0.026	0	0.057	2.688	0.605393
ENSG00000137338	PGBD1	4.499	7.772	9.633	4.494	3.206	9.35	2.363	3.534	3.035	1.858	1.19	4.267	3.136	4.532	4.399	2.085	3.112	3.666	2.655	4.104	0.605216
ENSG00000154548	SRSF12	1.675	3.754	5.853	0.066	0.031	1.688	0.494	0.929	0.129	0.078	0.231	0.056	1.104	0.064	0.057	1.982	0.428	0.112	0.454	1.097	0.605032
ENSG00000112053	SLC26A8	0.143	0.131	0.67	0.026	0.005	0.256	0.128	0.108	0.015	0	0.344	0.084	0.019	0.007	0.014	0.023	0.039	0.018	0.086	0.064	0.604316
ENSG00000162068	NTN3	0.122	0.224	3.777	0.153	0.219	0.098	0.551	0.532	0.005	0.17	0.06	0	0.012	0.074	0.019	0.023	0.089	0.029	0	0.148	0.60423
ENSG00000136861	CDK5RAP2	8.222	15.956	15.598	9.25	6.809	15.966	14.378	12.219	8.12	3.535	12.792	6.73	5.143	7.025	4.465	6.001	7.616	9.232	7.602	8.34	0.604171
ENSG00000179242	CDH4	7.208	6.271	9.281	6.155	5.742	0.712	2.29	0.852	3.818	0.147	0.181	12.063	1.249	6.162	0.163	0.125	0.027	0.045	0.019	0.419	0.604028
ENSG00000171786	NHLH1	0.476	0.982	3.17	0.056	0.1	0.083	0.139	0.139	0.129	0.111	0.372	0.12	0.286	0.075	0.563	0.375	0.101	0.096	0.05	0.205	0.603888
ENSG00000121753	BAI2	6.54	4.847	25.776	1.519	3.284	0.109	14.794	18.404	0.492	5.635	1.175	0.851	0.369	2.033	0.99	0.405	1.476	1.904	1.141	0.252	0.603697
ENSG00000101198	NKAIN4	2.26	2.82	33.323	0	0	0.002	2.126	2.388	0	0.012	0	0.005	0.347	0	0.019	0.045	0.06	0.006	0	0.059	0.603622
ENSG00000181790	BAI1	2.528	2.561	11.173	0.223	0.049	0.388	0.262	1.046	0.072	0.071	0.801	0.022	0.568	0	0.039	0.215	0.956	0.121	0.904	1.456	0.603499
ENSG00000196172	ZNF681	4.546	5.382	3.881	0.294	0.205	4.951	3.911	3.073	1.213	0.066	0.401	0.192	0.235	0.394	0.109	1.588	1.46	0.374	1.161	0.616	0.603465
ENSG00000177868	CCDC23	24.586	25.164	54.462	8.459	6.475	16.931	12.828	13.848	6.04	3.69	8.312	4.62	5.292	10.039	8.013	10.23	10.642	13.04	20.302	9.082	0.603102
ENSG00000137807	KIF23	15.887	23.176	7.372	13.781	8.734	1.42	4.156	4.83	7.818	2.814	0.307	12.943	4.669	11.022	5.831	0.285	1.557	0.154	1.751	0.51	0.603059
ENSG00000143093	FAM40A	12.085	18.335	19.602	13.096	10.234	13.744	11.186	12.415	16.565	12.939	18.016	16.228	12.704	10.498	16.06	8.84	10.833	7.409	6.901	12.579	0.602895
ENSG00000135824	RGS8	0.017	0.304	1.799	0	0	0	0.009	0.04	0.002	0.011	0	0.006	0.008	0	0	0.01	0.006	0	0	0	0.602654
ENSG00000197889	MEIG1	0.059	0.212	0.386	0.191	0.062	0.076	0.057	0.086	0.06	0.031	0.081	0.061	0.07	0.031	0.057	0.126	0.074	0.08	0	0.14	0.602496
ENSG00000167100	SAMD14	1.213	2.272	19.759	2.147	3.052	4.598	10.309	7.594	0.011	4.307	2.749	0.012	0.509	0.854	3.754	0.486	1.106	1.31	2.083	1.202	0.601859
ENSG00000166402	TUB	10.703	9.25	13.931	3.614	2.676	1.651	5.983	9.846	0.708	3.39	0.991	0.753	2.345	6.078	2.533	2.254	4.729	5.001	3.253	1.352	0.601772
ENSG00000160208	RRP1B	41.725	48.236	11.633	23.177	19.249	17.475	12.393	13.152	16.999	12.222	15.131	20.7	11.358	11.019	11.933	8.552	8.445	7.046	9.911	7.6	0.601661
ENSG00000147548	WHSC1L1	9.761	11.428	31.327	12.022	6.971	22.41	12.574	12.97	8.234	3.002	24.2	8.186	10.297	10.431	5.98	11.475	6.477	4.778	7.469	5.849	0.60157
ENSG00000100578	KIAA0586	5.788	7.483	6.866	6.472	4.125	10.445	3.745	4.099	3.905	1.52	4.249	4.795	1.857	7.33	3.379	4.832	2.913	2.427	1.704	2.357	0.601352
ENSG00000179331	RAB39	7.697	7.887	7.374	0	0.009	0.067	1.476	1.495	0	0.111	1.446	0.056	1.405	0.013	0.016	3.611	0.142	0.11	1.022	0.143	0.601234
ENSG00000104427	FAM164A	7.181	5.542	37.622	8.707	3.095	5.709	3.887	6.055	5.905	2.079	3.112	5.616	5.049	9.47	3.238	5.932	5.192	2.576	4.245	1.865	0.60121
ENSG00000184486	POU3F2	0.294	12.619	74.658	0.017	0.007	0.003	0.012	0.032	0.001	0.062	0	0	0.014	0.003	0	0	0	0.016	0	0.013	0.600905
ENSG00000242265	PEG10	53.033	100.325	123.317	18.851	37.588	0.109	9.775	21.663	1.127	13.002	0.808	33.688	19.307	16.661	4.669	71.889	6.342	0.984	4.275	12.961	0.600846
ENSG00000143476	DTL	26.273	34.593	8.746	8.263	19.063	8.894	5.413	5.179	5.421	14.573	0.463	19.734	0.13	9.994	5.281	0.201	1.307	0.198	1.504	0.163	0.600694
ENSG00000070770	CSNK2A2	32.973	37.667	42.506	50.745	30.434	34.507	21.921	21.874	36.601	37.064	24.288	30.493	35.584	28.628	28.191	34.946	17.015	20.468	26.344	23.485	0.600636
ENSG00000154478	GPR26	0.032	0.047	0.627	0	0	0	0.08	0.129	0	0	0	0	0.002	0	0	0.002	0.002	0	0	0.007	0.600604
ENSG00000152034	MCHR2	0.014	0.012	0.059	0	0	0	0.003	0.038	0	0	0	0	0	0.01	0	0	0	0	0	0	0.600122
ENSG00000186310	NAP1L3	22.36	24.236	29.736	0.153	0.272	33.945	1.586	5.937	0.563	0.163	1.746	0.083	1.566	2.717	0.049	12.352	2.41	1.969	1.959	1.054	0.599976
ENSG00000136451	VEZF1	23.586	40.283	54.252	40.204	23.37	43.187	18.091	22.008	12.277	13.585	28.513	9.802	37.554	20.765	16.678	32.407	18.484	21.542	21.548	13.559	0.599934
ENSG00000166477	LEO1	20.723	22.939	17.048	13.248	9.445	14.242	10.899	10.926	7.87	2.756	9.623	6.178	9.212	9.022	0.897	14.06	9.415	8.333	11.861	5.896	0.599911
ENSG00000070950	RAD18	7.137	9.144	5.509	4.871	5.887	7.306	2.736	3.812	6.16	2.26	2.786	7.242	9.034	4.574	4.274	1.51	2.241	1.073	2.984	1.229	0.599103
ENSG00000149657	LSM14B	28.31	28.153	36.284	19.373	11.092	17.688	21.8	21.598	11.548	12.723	8.233	11.627	5.042	10.525	15.666	5.198	16.785	26.034	15.157	12.465	0.599054
ENSG00000090889	KIF4A	14.776	25.683	9.637	11.831	6.754	1.098	5.113	4.501	4.32	4.077	0.147	13.846	0.024	11.065	7.925	0.113	1.284	0.028	1.759	0.05	0.598997
ENSG00000185610	DBX2	0.118	0.241	1.03	0.058	0.004	0	0.003	0.012	0	0	0	0	0.05	0.002	0	0.057	0.011	0.006	0	0.15	0.598964
ENSG00000138587	MNS1	3.837	3.231	9.436	2.697	1.878	7.866	2.927	3.72	0.189	0.05	0.116	0.366	2.848	2.43	0.17	2.711	2.206	0.576	1.735	2.276	0.598884
ENSG00000159147	DONSON	12.755	17.73	9.978	6.8	13.627	11.306	10.396	11.346	7.077	8.978	5.032	15.535	6.27	12.411	8.621	3.383	5.879	5.8	4.52	4.488	0.598645
ENSG00000146776	ATXN7L1	11.96	6.946	5.133	3.842	2.418	5.989	4.036	4.084	0.659	1.769	8.359	0.374	1.186	0.743	0.923	2.17	1.841	0.728	1.701	1.806	0.598498
ENSG00000140525	FANCI	29.308	44.693	12.222	13.594	11.27	16.761	10.465	10.864	11.272	8.735	7.884	29.028	0.696	12.252	8.259	0.742	5.383	0.919	5.357	1.625	0.59843
ENSG00000157851	DPYSL5	1.999	19.712	138.355	0	0.003	0	0.246	3.329	0	0	0	0.004	0.001	0	0.003	0.01	0.096	0.002	0.067	0	0.598156
ENSG00000164300	SERINC5	28.463	11.783	18.048	2.463	1.514	2.234	12.687	8.741	7.382	8.249	17.754	8.632	1.539	2.58	1.559	2.538	2.237	1.723	1.833	2.059	0.598139
ENSG00000167371	PRRT2	11.927	8.81	113.212	5.731	2.388	0.352	3.409	6.233	0.009	1.9	1.085	0.072	0.279	1.449	3.176	1.611	3.144	0.741	0.544	3.715	0.598098
ENSG00000141127	PRPSAP2	10.463	18.528	25.825	7.842	4.704	15.966	12.418	13.99	12.778	5.248	8.672	10.821	7.683	7.335	6.846	10.717	8.023	8.753	12.131	8.724	0.597863
ENSG00000108055	SMC3	58.169	76.328	43.052	15.353	12.706	39.438	50.683	38.091	9.72	3.275	26.817	8.425	30.908	19.001	3.853	31.012	15.965	14.403	14.337	12.199	0.597856
ENSG00000184117	NIPSNAP1	93.91	86.152	38.317	31.834	28.86	40.752	68.857	58.215	41.876	38.229	10.862	32.141	2.342	31.705	28.711	21.545	15.741	11.997	33.191	15.629	0.597441
ENSG00000180592	C10orf140	1.312	6.343	3.232	0.229	0.159	0.73	0.606	0.991	0.139	0.142	0.035	0.128	0.127	0.203	0.092	0.342	0.352	0.603	0.117	0.49	0.597064
ENSG00000147677	EIF3H	53.556	49.652	134.391	50.091	32.768	106.486	45.42	44.932	54.536	20.793	65.791	51.428	45.761	53.343	26.846	47.423	35.764	29.767	57.958	23.293	0.596992
ENSG00000171649	ZIK1	13.409	13.547	4.348	2.336	2.149	7.407	4.353	4.424	2.839	1.584	2.923	1.636	1.72	2.793	0.658	2.915	1.719	2.822	0.305	1.406	0.596743
ENSG00000198211	TUBB3	127.203	98.296	1615.47	64.837	196.542	0.345	3.433	27.577	26.119	174.345	0.12	78.319	5.765	98.658	133.118	10.258	4.502	4.037	8.618	1.725	0.596739
ENSG00000170085	C5orf25	4.134	5.718	12.998	5.002	7.014	2.669	4.17	3.587	2.64	6.968	4.689	5.778	2.432	2.787	3.765	6.74	2.569	0.909	3.643	3.168	0.596335
ENSG00000118193	KIF14	10.529	15.452	3.654	4.289	2.339	1.215	1.948	1.998	3.485	1.18	0.176	5.869	0.394	3.756	1.479	0.017	0.63	0.03	0.417	0.037	0.596309
ENSG00000204347	BTBD17	9.074	6.274	13.984	0	0	0.069	0.188	0.73	0	0	0.068	0	0.017	0.002	0	5.497	0	0.01	0.192	0.577	0.596274
ENSG00000132932	ATP8A2	4.439	1.845	2.695	0.429	0.04	0.092	0.476	1.482	0.155	0.106	0.175	0.315	0.005	0.016	0.132	0.439	0.514	0.022	0.194	0.109	0.596234
ENSG00000157193	LRP8	35.222	16.499	22.748	6.303	10.367	5.661	0.54	1.386	8.155	6.075	5.157	23.276	1.969	4.402	11.304	1.581	1.42	0.83	0.622	0.277	0.5962
ENSG00000106477	CEP41	2.878	3.278	5.028	4.061	4.321	4.928	1.876	2.134	2.566	3.183	1.04	3.359	0.722	3.71	3.231	3.862	0.985	0.93	1.235	1.028	0.596001
ENSG00000170312	CDK1	29.644	43.17	17.434	8.142	9.393	2.273	11.528	11.841	9.647	11.241	0.329	18.543	0.053	10.71	8.126	0.385	7.048	0.315	9.463	0.416	0.595799
ENSG00000029993	HMGB3	72.698	81.418	32.163	9.528	7.276	16.677	12.211	12.563	31.529	10.161	1.441	27.946	1.787	11.018	11.541	4.429	5.155	4.039	10.331	5.027	0.595721
ENSG00000099954	CECR2	29.435	35.136	21.64	0.007	0.002	0	0.515	1.086	0.006	0.958	0.076	0.008	0.062	0.023	0.007	0.828	0.484	4.354	0.675	4.329	0.595593
ENSG00000101812	H2BFM	0.081	0.057	0.263	0	0.002	0.022	0.002	0.015	0.009	0.006	0.01	0.088	0.03	0.016	0.03	0.034	0.006	0	0	0	0.595467
ENSG00000137822	TUBGCP4	8.979	11.164	15.299	9.132	5.881	17.443	10.967	11.528	11.962	9.866	5.843	12.775	13.029	6.478	5.214	6.493	5.145	8.805	5.431	5.103	0.595463
ENSG00000136504	KAT7	46.316	42.411	28.439	16.718	13.545	26.676	10.775	10.263	9.083	11.665	31.195	9.775	20.776	12.821	25.285	17.258	9.504	11.839	5.92	4.391	0.595344
ENSG00000087301	TXNDC16	16.807	8.547	13.437	0.754	0.801	11.288	9.128	7.726	1.306	1.85	5.432	2.081	1.438	3.49	2.306	6.115	3.277	1.629	2.289	2.067	0.595081
ENSG00000183979	NPB	1.159	0.545	10.251	1.516	1.092	0.776	0.884	1.109	0.016	1.498	0.274	0.083	0.518	0.192	0.484	0.509	0.379	0.333	1.001	0.772	0.595058
ENSG00000178904	DPY19L3	23.96	27.693	14.636	7.5	4.18	18.458	18.71	19.689	4.34	11.563	5.533	3.153	3.211	15.507	10.397	7.108	4.219	3.516	4.727	6.572	0.59505
ENSG00000156103	MMP16	13.908	6.128	5.957	1.938	1.814	0.066	2.676	3.141	0.01	0.227	0	0.026	0.157	0.705	1.853	1.278	0.51	0.215	0.064	0.111	0.594977
ENSG00000182319	NA	15.588	23.276	27.289	2.185	4.678	0.549	14.107	11.151	4.679	14.761	5.268	8.268	4.829	2.959	12.178	3.718	3.502	3.004	4.52	11.438	0.594798
ENSG00000165480	SKA3	42.561	34.946	10.857	16.517	17.671	2.403	3.4	2.836	5.945	6.062	0.112	11.308	0.062	9.348	7.986	0.1	2.845	0.056	3.77	0.173	0.594482
ENSG00000102221	PHF16	7.75	10.709	7.538	4.388	1.564	8.809	7.183	5.65	4.46	2.905	1.126	3.344	3.422	3.18	4.325	3.949	3.248	2.288	4.413	4.376	0.594234
ENSG00000153044	CENPH	37.645	49.277	8.715	9.861	12.727	13.558	4.148	4.164	4.774	4.493	1.858	7.341	1.404	5.125	3.548	0.726	3.689	1.529	3.234	1.064	0.594232
ENSG00000157680	DGKI	0.054	0.371	1.808	1.435	0.698	0.018	0.121	0.398	0.009	0.081	0	0.006	0.129	0.243	0.04	0.126	0.311	0.158	0.247	0.064	0.594171
ENSG00000145863	GABRA6	0	0	0.015	0	0	0.003	0.003	0.002	0	0	0	0	0	0	0	0	0	0	0	0	0.594105
ENSG00000170633	RNF34	13.357	14.942	12.714	13.127	10.079	10.205	11.449	11.347	13.942	12.777	13.167	13.111	5.439	11.614	11.696	9.383	6.28	8.383	11.038	7.243	0.593877
ENSG00000255475	NA	0	0	0.01	0.005	0	0	0	0	0	0	0	0	0	0	0	0	0	0	0	0	0.593664
ENSG00000212124	TAS2R19	0.144	0.131	2.779	0.472	0.621	1.131	0.388	0.669	0.155	0.64	0.721	0.046	0.304	0.282	0.249	0.357	0.188	0.193	0	0.461	0.593558
ENSG00000156395	SORCS3	0.445	0.209	6.214	0.367	0.098	0	0.203	1.096	0	0.004	0.125	0	0.012	0.021	0	0	0.117	0.014	0.125	0	0.593512
ENSG00000206199	ANKUB1	0.335	1.089	5.85	0.677	0.595	0.486	1.036	0.988	1.602	0.349	0.765	0.921	0.327	1.639	0.541	1.059	0.279	0.285	0.346	0.088	0.593461
ENSG00000160191	PDE9A	8.867	9.121	28.179	1.77	2.309	0.155	7.672	4.938	0.053	1.1	1.062	0.33	3.344	0.859	0.087	3.596	4.919	1.062	4.673	4.925	0.593451
ENSG00000197472	ZNF695	6.817	5.47	1.998	0.761	0.684	1.168	0.36	0.393	0.217	0.851	0.09	0.328	0.385	0.462	0.499	0.029	0.225	0.008	0.171	0.055	0.593398
ENSG00000075218	GTSE1	18.754	16.916	14.988	13.843	16.666	0.64	3.731	3.774	2.498	21.659	0.441	10.341	0.201	4.893	11.908	0.083	3.036	0.321	3.095	0.173	0.592833
ENSG00000035499	DEPDC1B	22.159	30.749	7.897	2.911	2.266	4.095	10.564	6.356	7.689	4.085	0.433	11.484	0.24	2.957	3.425	0.067	1.137	0.042	1.883	0.122	0.592684
ENSG00000166426	CRABP1	176.821	555.71	221.654	0.059	0.022	0.21	4.504	7.095	0	0.868	0	0	0.576	0.006	0.043	0.347	0.07	0	0.585	0.106	0.592444
ENSG00000175718	RBMXL3	0	0	0.024	0.013	0	0	0	0	0	0	0	0	0	0	0	0	0	0	0	0	0.592073
ENSG00000133318	RTN3	124.221	54.909	117.864	29.237	23.967	59.06	26.612	27.072	15.821	28.68	27.971	20.149	29.935	45.286	28.907	53.725	27.648	19.976	21.134	32.352	0.592052
ENSG00000139971	C14orf37	7.069	4.08	12.784	0.522	0.418	2.008	1.4	2.374	0.523	1.228	0.701	0.415	1.706	2.648	0.941	2.702	1.469	2.047	1.693	1.316	0.591878
ENSG00000258947	NA	35.22	27.086	442.291	18.57	54.396	0.602	2.307	9.047	7.551	75.067	3.535	21.786	2.875	27.419	38.067	4.367	2.438	1.487	2.732	4.119	0.591723
ENSG00000150477	KIAA1328	1.406	1.631	10.219	1.938	1.984	6.098	2.328	2.437	1.83	0.596	3.178	1.274	1.472	1.336	0.95	2.659	1.57	1.298	0.974	1.407	0.591695
ENSG00000161082	CELF5	5.973	2.211	42.599	0.024	0.048	0.056	0.254	1.358	0.025	0.083	0.047	0.051	0.091	0.004	0.007	0.64	0.056	0.002	0.307	0.606	0.591079
ENSG00000173914	RBM4B	8.354	11.04	30.239	5.452	4.429	11.765	11.406	12.546	7.343	9.202	10.45	10.667	8.903	9.162	14.236	6.028	6.972	3.098	6.742	6.369	0.591062
ENSG00000168582	CRYGA	0.032	0	0.167	0	0	0	0.005	0	0	0	0	0	0	0	0	0	0	0	0	0	0.591047
ENSG00000109956	B3GAT1	5.647	7.904	19.605	0.006	0.002	0.001	0.383	0.537	0.021	0.739	2.902	0.02	0.143	0.001	0.003	0.371	0.042	0.007	6.965	0.307	0.590931
ENSG00000102935	ZNF423	19.909	33.093	14.357	2.346	1.374	0.437	6.231	4.037	0.012	0.942	0	0.009	0.741	0.113	2.175	2.037	2.721	2.159	1.398	3.107	0.590762
ENSG00000155511	GRIA1	0.512	0.284	19.628	0.794	3.72	0	0.011	0.47	0.001	0	0.006	0.005	0.011	0.52	0.005	0.058	0.073	0.062	0.104	0.063	0.590441
ENSG00000170579	DLGAP1	2.018	2.655	28.8	0.022	0.009	0.024	0.165	0.233	0.001	1.978	0.048	0.002	0.079	0.097	0.007	0.036	0.465	0.03	0.048	0.201	0.590164
ENSG00000213024	NUP62	47.746	64.086	49.48	40.175	78.575	18.633	22.389	22.679	9.572	54.29	25.165	15.322	17.756	7.691	25.958	19.935	21.901	18.267	19.709	26.884	0.590088
ENSG00000066279	ASPM	37.486	22.769	9.451	8.309	4.936	1.498	5.446	4.961	3.798	2.267	0.418	5.28	0.017	5.745	2.965	0.045	1.203	0.039	0.44	0.059	0.589928
ENSG00000118579	MED28	47.492	48.574	32.84	28.477	22.683	44.157	34.904	32.731	18.169	13.707	19.54	19.945	27.35	21.979	30.749	12.687	17.4	10.373	39.018	13.936	0.589869
ENSG00000111602	TIMELESS	34.609	54.238	13.546	10.434	18.654	10.646	11.933	11.729	2.011	13.141	4.17	2.619	1.977	1.895	4.848	3.271	7.022	2.835	8.463	7.928	0.589708
ENSG00000115421	PAPOLG	5.076	6.387	7.389	2.768	1.675	6.458	3.915	4.631	4.058	1.532	4.957	3.127	6.057	4.058	2.152	4.028	3.003	2.29	2.889	2.431	0.589486
ENSG00000153187	HNRNPU	112.21	163.016	85.075	76.211	59.414	175.243	99.307	97.991	51.001	25.101	75.6	48.576	103.503	69.038	24.587	52.743	56.895	40.114	49.435	46.796	0.589422
ENSG00000137942	FNBP1L	43.686	56.776	97.931	4.309	2.195	11.771	38.924	42.956	13.92	3.174	0.5	13.44	26.734	3.932	20.838	27.674	7.663	9.639	25.908	13.327	0.589295
ENSG00000101327	PDYN	0.365	0.843	8.772	0	0	0	0.002	0.065	0.007	0	0	0	0.007	0.002	0	0	0.005	0	0.024	0	0.589094
ENSG00000105323	HNRNPUL1	132.637	126.337	200.767	136.328	196.635	139.252	65.304	64.504	21.634	180.556	138.175	27.567	81.048	26.49	42.927	100.856	72.831	57.569	98.378	60.815	0.589041
ENSG00000147874	HAUS6	21.278	19.503	6.66	4.592	4.359	9.739	4.038	4.567	7.247	2.731	6.375	7.035	3.428	5.756	3.189	2.34	3.191	2.525	3.249	2.434	0.588852
ENSG00000254377	NA	0.555	2.221	20.786	0	0	0	0	0.001	0	0	0	0	0	0	0	0	0	0	0	0	0.58878
ENSG00000100749	VRK1	29.303	31.049	10.49	6.073	5.553	15.826	5.66	5.636	9.307	4.293	7.229	12.318	1.91	7.53	2.657	2.726	4.527	1.737	8.053	1.943	0.588733
ENSG00000112242	E2F3	24.325	24.928	4.903	7.281	9.303	20.927	9.839	11.109	11.397	7.089	9.121	9.299	4.144	9.828	7.443	1.512	4.302	4.008	3.74	1.647	0.588383
ENSG00000177335	C8orf31	0.136	0.34	3.558	0.561	0.502	0.184	0.386	0.536	0.002	0.017	0.693	0	0.013	0.725	0.004	0.222	0.221	0.224	0.088	0.248	0.58829
ENSG00000164385	C6orf195	0.114	0.127	0.351	0.045	0.062	0.105	0.119	0.033	0.004	0	0	0	0.015	0.019	0.048	0.01	0.043	0.182	0	0.038	0.588207
ENSG00000079462	PAFAH1B3	58.818	78.103	295.78	26.73	38.321	29.049	16.527	15.966	22.535	140.209	5.55	52.295	4.71	10.645	63.509	15.277	22.386	4.004	37.74	21.437	0.588152
ENSG00000164754	RAD21	48.417	95.48	95.043	40.225	17.69	68.449	40.524	39.646	24.377	18.64	52.408	30.974	64.122	47.648	12.701	37.947	41.018	42.265	39.077	16.795	0.588039
ENSG00000197275	RAD54B	7	8.45	2.894	1.424	1.682	2.4	2.324	2.169	2.127	0.924	1.081	2.598	0.351	2.359	1.173	1.1	1.671	0.342	1.07	1.396	0.58785
ENSG00000175455	CCDC14	17.05	13.457	19.138	6.454	3.568	32.191	13.982	14.968	7.587	1.167	5.942	3.516	2.873	5.538	4.948	3.406	5.833	1.861	2.192	9.234	0.587447
ENSG00000196987	NA	0.051	0.016	0.116	0.001	0	0	0.004	0.046	0.002	0.056	0.016	0.005	0	0	0	0.012	0.008	0	0	0	0.587336
ENSG00000182968	SOX1	0.039	6.245	50.849	0.046	0.009	0.018	0.003	0.026	0	0.359	0	0	0	0	0	0	0	0	0	0.013	0.587118
ENSG00000104824	HNRNPL	227.554	338.206	130.315	149.571	173.927	152.116	102.037	103.509	105.571	122.517	159.455	115.366	121.704	79.601	125.979	71.512	116.191	78.77	121.745	105.624	0.58698
ENSG00000100479	POLE2	11.495	13.105	2.671	2.5	7.218	6.173	3.096	3.389	2.724	4.599	0.294	4.315	0.231	3.753	2.708	0.711	1.802	0.305	2.291	0.573	0.586863
ENSG00000186767	SPIN4	5.681	12.237	7.886	3.955	8.715	17.298	6.08	6.334	3.863	1.867	4.016	8.687	1.541	7.193	4.165	3.427	3.243	0.582	1.568	1.255	0.586682
ENSG00000144231	POLR2D	34.845	42.064	13.919	21.561	27.519	21.972	17.715	15.867	12.717	14.528	13.351	20.213	15.609	18.665	10.027	9.552	8.38	17.794	16.613	8.164	0.586331
ENSG00000176049	JAKMIP2	7.614	7.245	12.349	0.272	0.01	8.165	0.476	1.421	0	0.071	1.685	0.028	0.005	1.656	0	6.737	0.215	0.047	1.114	0.905	0.586292
ENSG00000164985	PSIP1	136.394	107.635	44.496	14.784	12.168	68.41	16.068	19.081	2.685	1.468	19.849	4.963	3.206	15.828	3.743	7.5	11.781	7.18	13.118	7.702	0.586255
ENSG00000112742	TTK	23.16	33.621	9.037	5.104	3.401	1.727	4.254	3.727	4.975	2.352	0.224	9.35	0.059	6.533	2.362	0.076	1.879	0.055	1.506	0.086	0.586119
ENSG00000178235	SLITRK1	3.824	0.685	7.451	0	0.01	0.043	0.091	0.221	0.003	0	0	0.006	0	0.01	0	1.281	0.027	0	0	0.437	0.586088
ENSG00000166681	NGFRAP1	198.261	237.057	241.346	139.959	144.195	82.48	59.997	73.637	97.472	116.407	6.476	70.409	34.499	188.019	154.329	166.472	42.323	38.394	79.927	40.227	0.586061
ENSG00000135097	MSI1	16.429	26.22	105.778	0.079	0.016	0.001	4.334	5.939	0.003	0.098	0	0.009	14.177	0.007	0.023	15.894	0.375	2.063	5.652	5.076	0.586039
ENSG00000175390	EIF3F	26.315	24.778	43.555	43.187	62.181	34.004	20.997	20.355	15.209	28.667	25.104	18.553	20.069	19.007	29.127	19.876	15.313	14.354	26.779	13.019	0.585448
ENSG00000197102	DYNC1H1	39.917	38.37	107.408	148.379	69.96	36.371	45.365	47.479	43.618	51.892	45.945	32.681	47.995	33.372	46.595	44.343	29.022	38.274	14.055	24.703	0.585217
ENSG00000138346	DNA2	15.594	22.421	5.955	1.115	1.849	3.988	4.299	4.011	2.718	1.051	1.222	2.466	0.953	2.102	1.689	1.073	1.468	0.835	0.773	1.451	0.585013
ENSG00000204352	C9orf129	8.193	4.699	4.581	5.488	4.116	2.274	9.52	8.405	3.371	4.389	2.651	6.005	2.014	1.316	0.987	2.824	0.714	1.06	0.942	1.345	0.584686
ENSG00000100084	HIRA	20.272	29.669	14.186	25.069	20.757	15.676	18.067	17.954	17.036	17.424	21.54	19.947	14.459	14.885	17.074	13.29	11.652	11.944	16.17	11.091	0.58454
ENSG00000067840	PDZD4	131.079	60.738	88.723	0.121	0.218	0.051	1.216	4.702	0.1	2.784	13.466	0.195	0.474	0.028	0.071	5.072	11.081	1.58	2.967	12.468	0.584315
ENSG00000181588	MEX3D	34.567	33.376	43.338	20.846	29.264	0.695	9.054	10.841	5.244	22.111	0.637	11.246	7.252	4.716	38.474	3.755	8.598	4.025	16.148	4.226	0.584158
ENSG00000126950	TMEM35	6.599	5.196	66.677	18.726	16.925	0.029	0.744	4.264	0.038	0.177	0	0.156	0.014	23.61	9.408	0.1	7.621	0.069	0.05	0.49	0.584111
ENSG00000184388	PABPC1L2B	0.743	0.211	0.463	0	0	0	0	0.036	0	0	0	0	0.008	0	0	0.007	0.012	0	0	0	0.584022
ENSG00000134982	APC	11.034	8.788	91.724	6.189	4.371	6.759	11.713	13.455	8.7	1.483	6.96	7.234	5.581	12.373	3.928	13.256	4.052	4.868	2.736	3.024	0.583874
ENSG00000188610	FAM72B	7.541	6.884	2.133	2.605	1.711	0.594	0.883	0.82	1.514	1.338	0.666	2.455	0.076	1.191	1.038	0.25	1.013	0.149	0.667	0.439	0.583678
ENSG00000083312	TNPO1	31.234	55.356	20.137	29.723	15.272	30.036	26.685	27.804	26.327	11.591	11.843	16.858	22.974	22.379	25.087	18.638	9.432	15.877	15.851	6.376	0.583656
ENSG00000196503	ARL9	0.493	1.164	9.056	0.473	0.149	1.706	0.364	0.576	0.453	1.004	0	0.796	0.961	1.002	0.801	0.725	0.278	0.051	0.232	0.434	0.583642
ENSG00000163673	DCLK3	0.541	0.631	0.834	0	0	0.001	0.214	0.714	0	0.005	0.017	0	0.253	0.002	0	0.104	0.062	0.207	0.024	0.097	0.583431
ENSG00000155980	KIF5A	9.046	6.917	84.563	0.051	0.015	2.834	0.533	7.744	0.054	0.112	0.157	0.514	0.941	0.572	0.071	6.811	0.727	0.066	0.249	1.2	0.583402
ENSG00000148704	VAX1	0.007	0.165	2.565	0	0.208	0	0	0	0.01	0	0	0	0	0	0	0	0.001	0	0	0	0.583292
ENSG00000165973	NELL1	0.096	0.483	4.175	0	0	0	1.965	1.919	0.001	0	0	0	0	0	0	0	0.046	0.002	0	0.005	0.583205
ENSG00000101098	RIMS4	9.528	7.507	5.63	0	0.004	0	6.256	2.797	0.003	0.094	0	0.006	0.002	0.014	0.007	0.2	0.082	0.06	2.923	0.121	0.582956
ENSG00000130711	PRDM12	0.035	0.18	0.142	0.183	0.013	0	0.022	0.028	0.003	0.031	0.018	0.006	0.036	0.01	0.006	0.081	0.011	0.013	0	0.021	0.582881
ENSG00000174799	CEP135	3.955	5.951	4.47	2.023	1.4	9.646	3.639	3.843	1.997	0.403	4.942	1.226	2.125	2.499	0.928	1.035	1.446	0.875	1.219	1.358	0.582866
ENSG00000182010	RTKN2	7.003	8.205	4.458	0.353	0.263	0.388	2.498	2.264	1.041	0.467	0.951	0.808	0.321	0.818	0.335	0.153	3.463	0.003	0.588	0.124	0.582596
ENSG00000113368	LMNB1	54.394	147.235	38.08	11.126	29.565	28.72	24.483	23.712	5.813	15.783	9.751	24.335	0.629	17.249	36.963	1	7.663	0.904	9.326	1.151	0.582539
ENSG00000099901	RANBP1	64.288	93.051	25.517	26.459	40.113	15.269	11.784	13.137	21.8	13.556	8.5	39.384	16.275	22.317	17.343	9.811	9.131	6.096	13.792	8.186	0.582408
ENSG00000140350	ANP32A	38.865	57.605	35.439	12.858	8.463	35.987	28.374	24.259	11.748	12.608	17.628	10.537	5.17	9.412	10.947	7.379	12.343	24.934	25.686	10.892	0.5823
ENSG00000092201	SUPT16H	70.054	101.873	30.098	31.337	20.554	34.642	29.101	29.035	29.065	11.996	20.007	28.743	25.521	29.625	19.554	16.165	19.809	16.158	22.086	12.572	0.582143
ENSG00000102385	DRP2	0.134	0.502	8.363	0.196	0.329	0.063	0.822	1.256	0.04	0.082	0.017	0.045	0.001	0.471	0.156	0.018	0.279	0.019	0.18	0.054	0.581771
ENSG00000175130	MARCKSL1	473.127	501.123	1166.51	21.137	42.095	50.823	81.998	90.23	13.435	837.268	33.227	14.725	94.703	66.823	298.002	20.076	12.488	20.029	141.422	26.866	0.581712
ENSG00000224130	NA	0.062	0.019	0.082	0.05	0.075	0	0.1	0.106	0.023	0	0	0.053	0.005	0.036	0	0	0.013	0	0	0	0.581655
ENSG00000130751	NPAS1	3.737	2.847	59.442	0.665	3.751	0.62	0.21	0.265	0.263	0.719	0.196	0.272	0.436	0.177	0.213	0.2	0.633	0.594	1.096	0.681	0.581625
ENSG00000164815	ORC5	12.153	10.631	4.996	11.384	4.38	8.256	6.143	5.788	6.662	3.806	1.755	5.174	4.931	4.9	3.505	4.83	3.604	3.202	5.451	2.83	0.581532
ENSG00000005156	LIG3	14.794	19.865	8.876	6.35	7.687	6.521	6.05	6.613	8.311	5.198	8.584	8.598	8.727	8.091	7.39	5.339	4.999	5.114	3.461	6.626	0.581371
ENSG00000112218	GPR63	10.614	5.757	4.215	1.323	1.362	1.263	1.755	1.723	2.113	1.072	0.134	2.483	0.083	1.409	0.118	0.89	0.538	0.179	1.762	0.719	0.5811
ENSG00000129682	FGF13	19.896	20.247	14.766	0.155	0.09	0.086	1.628	9.336	0.007	0	0.167	0.004	0.877	1.056	0.03	0.253	2.575	0.474	6.582	0.525	0.581066
ENSG00000254004	ZNF260	13.961	13.428	8.371	3.739	1.155	7.731	8.123	7.926	6.088	0.75	1.534	3.385	2.773	6.105	2.699	4.553	3.369	3.801	3.759	2.539	0.580978
ENSG00000213023	SYT3	8.464	1.168	7.794	0.01	0.106	0.122	0.03	0.513	0.001	0.962	0.037	0	0.474	0.002	0.051	0.905	0.103	0.038	0.042	0.201	0.580816
ENSG00000153266	FEZF2	0.005	0.319	2.943	0.032	0.02	0	0.004	0	0	0	0	0	0	0.008	0	0.065	0	0	0	0	0.580784
ENSG00000186185	KIF18B	19.43	18.183	25.977	21.126	36.217	0.653	3.862	4.001	3.888	16.372	0.255	20.656	0.022	5.247	21.397	0.062	4.266	0.094	2.071	0.191	0.580535
ENSG00000213190	MLLT11	20.603	39.019	281.123	1.714	2.139	11.277	3.499	12.529	11.534	5.224	16.532	11.72	7.307	6.997	26.352	15.231	2.919	11.715	3.983	2.162	0.580198
ENSG00000251503	APITD1-CORT	4.591	6.426	22.714	5.074	4.478	3.539	3.54	2.893	2.799	2.658	0.834	5.836	0.736	2.699	1.991	4.61	2.986	1.086	7	3.649	0.580144
ENSG00000250486	C4orf39	1.661	0.665	4.938	0.888	0.376	1.972	1.195	1.349	0.428	0.047	0.501	0.201	0.512	0.263	0.044	1.734	0.674	0.405	0.178	0.998	0.580119
ENSG00000130726	TRIM28	269.822	438.091	296.451	250.062	399.251	163.813	110.468	111.851	117.17	422.59	98.52	223.611	218.984	85.614	278.287	106.047	100.865	61.058	102.409	121.494	0.579882
ENSG00000106086	PLEKHA8	6.873	10.418	3.751	2.018	0.977	2.438	1.154	1.849	2.577	1.639	0.996	2.006	1.552	2.666	1.471	1.051	1.411	0.905	1.887	1.056	0.578974
ENSG00000089505	CMTM1	1.337	1.981	7.136	2.131	2.379	2.104	1.23	1.737	0.429	0.486	1.875	1.908	0.591	0.985	4.272	1.397	0.553	0.243	0.545	1.364	0.578667
ENSG00000158748	HTR6	1.245	0.239	1.477	0.024	0.014	0.045	0.015	0.047	0	0.042	0.985	0.007	0.061	0.022	0.019	0.008	0.029	0	0.065	0.026	0.578344
ENSG00000256980	NA	0.229	0.709	2.305	0.489	0.54	0.299	0.094	0.212	0.119	0.01	0.15	0.59	0.213	0.739	0.486	0.369	0.303	0.157	0.115	0.203	0.578325
ENSG00000196628	TCF4	30.157	20.629	126.627	10.179	6.453	21.405	7.844	13.954	3.529	0.707	3.111	3.094	1.069	12.018	41.517	7.518	8.194	9.291	10.132	3.693	0.578306
ENSG00000198900	TOP1	100.086	79.63	44.87	79.086	45.104	38.232	49.64	52.307	18.887	5.905	26.351	11.181	71.296	20.844	5.71	26.105	30.884	17.567	38.174	18.438	0.578231
ENSG00000139737	SLAIN1	10.542	11.602	154.581	0.202	0.031	14.554	2.673	2.397	0.005	0.033	3.956	0	2.382	0.119	1.508	5.66	0.949	1.177	5.675	3.679	0.578163
ENSG00000154001	PPP2R5E	16.517	19.756	13.476	8.795	5.76	11.527	7.46	8.21	8.867	3.534	8.816	8.589	8.09	13.306	3.174	8.067	8.26	8.136	8.081	4.441	0.578011
ENSG00000163873	GRIK3	1.154	0.905	7.119	0	0	0	0.491	2.542	0.001	0.008	0	0	0.098	0	0	0.318	0.651	0.189	0.217	0.137	0.57797
ENSG00000156689	GLYATL2	0.197	0.517	2.725	0.831	0.556	2.459	0.159	0.132	0.065	0.644	0	0.431	0.415	1.056	0	0.157	0.165	0.107	0.372	0.029	0.577936
ENSG00000072832	CRMP1	41.926	38.629	513.12	1.337	0.166	0.75	3.084	10.664	0.008	0.516	0.122	0.018	0.326	0.495	0.028	26.737	2.547	0.577	1.176	3.769	0.577772
ENSG00000006634	DBF4	22.271	24.291	5.056	6.331	3.47	8.662	5.396	6.708	2.484	1.803	10.772	3.426	3.767	3	1.027	1.358	2.106	0.835	3.561	2.834	0.577706
ENSG00000101407	TTI1	21.325	29.007	16.064	13.864	17.609	12.668	11.445	10.884	11.867	13.685	7.085	20.111	9.713	11.133	13.019	14.464	7.088	7.849	8.682	12.196	0.57767
ENSG00000075856	SART3	18.216	23.587	12.591	14.134	11.479	9.671	15.485	14.679	6.475	5.649	12.88	7.257	17.702	6.76	4.282	8.065	8.832	7.79	9.277	9.611	0.57759
ENSG00000155130	MARCKS	78.161	86.952	177.233	57.866	79.118	4.937	68.843	80.533	46.316	88.915	17.98	20.874	64.436	116.277	73.627	42.876	40.353	8.45	58.44	28.581	0.577494
ENSG00000134744	ZCCHC11	6.967	6.9	14.984	4.081	2.135	10.242	8.534	8.181	3.327	1.106	12.613	3.397	7.713	4.326	3.702	6.312	2.557	2.916	2.28	3.101	0.577354
ENSG00000173894	CBX2	32.037	45.424	13.15	1.143	2.634	24.924	6.781	7.38	1.583	8.724	0.077	3.465	1.02	0.512	10.309	0.6	2.086	2.127	0.516	3.457	0.577255
ENSG00000169676	DRD5	0.099	0.156	0.399	0.01	0	0	0.1	0.134	0	0	0.085	0.006	0.004	0	0	0.007	0.006	0.091	0.109	0.022	0.577178
ENSG00000181007	ZFP82	6.034	8.88	5.143	1.545	0.699	3.351	2.519	2.94	1.797	0.44	2.505	1.399	2.767	2.849	1.268	3.717	1.332	1.88	1.212	1.365	0.577116
ENSG00000130558	OLFM1	14.561	10.87	36.129	0.354	3.502	0.021	0.682	6.438	0.093	7.601	1.56	0.045	0.581	0.863	0.04	8.468	6.166	2.113	1.834	3.287	0.577004
ENSG00000162951	LRRTM1	0.682	0.385	2.952	0.018	0.004	0.002	0.404	0.982	0	0	0.009	0	0	0	0	0.563	0.154	0.088	0.051	0.021	0.576782
ENSG00000185480	C12orf48	9.6	14.649	2.873	3.063	1.602	4.081	2.747	2.63	2.245	1.97	0.636	2.674	0.089	2.716	1.403	0.303	2.461	0.128	1.498	0.396	0.576682
ENSG00000101266	CSNK2A1	63.178	60.081	34.351	48.285	26.403	34.355	29.611	31.283	39.709	23.011	15.426	45.318	21.913	38.05	27.186	21.863	19.113	29.86	30.003	11.969	0.576634
ENSG00000204271	SPIN3	4.595	4.247	7.684	2.946	0.707	2.6	5.76	6.035	1.801	0.946	1.746	1.605	2.067	1.665	1.352	2.711	2.706	1.04	1.931	3.388	0.576075
ENSG00000205639	MFSD2B	7.342	7.797	6.87	6.728	7.266	2.572	0.483	0.824	1.955	5.241	0.579	4.7	0.823	1.166	4.285	3.262	0.836	0.364	5.023	1.294	0.575894
ENSG00000242259	C22orf39	17.298	22.833	17.179	20.144	15.976	17.061	15.648	16.095	14.083	14.576	19.36	16.191	12.056	13.317	16.388	12.466	13.634	15.324	17.874	12.166	0.575746
ENSG00000167325	RRM1	40.404	70.403	48.316	26.265	30.063	25.711	24.789	22.602	24.818	17.825	9.405	65.434	16.802	50.133	25.895	10.93	12.508	12.597	18.048	4.614	0.575554
ENSG00000092621	PHGDH	56.283	79.406	36.806	108.816	34.532	11.017	32.247	22.255	7.386	68.86	1.309	18.701	20.997	8.584	10.675	10.932	19.469	2.566	11.857	12.181	0.575345
ENSG00000120160	C9orf11	0.113	0.214	0.724	0	0	0.081	0.132	0.189	0.046	0.036	0.065	0.021	0.093	0	0	0.034	0.064	0.011	0.093	0.193	0.57492
ENSG00000164434	FABP7	3.764	11.845	174.573	0	0	0	0.028	0.036	0.004	3.008	0	0.011	0.102	0.002	0	0.082	0.01	0.035	0	0.031	0.574815
ENSG00000103995	CEP152	4.55	4.673	4.484	1.588	1.485	9.588	2.603	2.427	0.783	0.667	2.969	0.499	0.784	0.507	0.567	0.835	1.434	0.844	0.814	1.707	0.57471
ENSG00000196267	ZNF836	5.854	2.862	7.063	1.095	0.724	4.864	3.705	3.339	1.548	1.273	3.733	1.289	1.752	1.241	0.77	2.323	2.478	1.514	2.12	2.166	0.574697
ENSG00000135643	KCNMB4	12.775	9.333	7.538	0.334	0.501	3.166	1.005	1.758	0.797	0.117	0.368	0.727	0.116	0.274	2.301	0.47	2.254	1.636	1.868	0.581	0.574677
ENSG00000073111	MCM2	41.415	76.259	35.615	19.513	71.068	31.41	14.058	12.462	12.553	53.749	4.158	50.261	6.355	19.189	40.09	1.454	5.136	2.875	6.252	1.346	0.574645
ENSG00000106723	SPIN1	43.461	51.955	61.174	38.572	20.475	57.091	44.355	45.205	43.052	12.993	14.688	32.486	36.036	56.053	29.971	29.18	25.158	19.683	34.803	26.79	0.574621
ENSG00000151725	MLF1IP	45.205	74.419	14.49	10.3	7.507	34.261	4.594	5.164	3.978	3.915	2.562	14.375	0.63	9.398	3.595	0.587	6.58	0.601	3.506	0.66	0.574589
ENSG00000198153	NA	0.009	0	0.439	0.13	0.118	0.11	0.088	0.158	0.121	0	0	0	0.017	0.226	0	0.011	0.057	0.027	0	0	0.57458
ENSG00000235471	NA	5.643	5.37	19.278	3.134	3.318	2.079	2.12	4.562	2.178	6.029	0.125	2.765	4.076	2.811	4.381	1.579	4.998	1.236	2.974	3.945	0.57423
ENSG00000198554	WDHD1	17.113	26.16	4.488	3.942	4.586	5.872	4.44	4.023	5.629	1.569	0.498	7.928	1.317	5.87	2.261	0.526	1.46	0.829	1.264	0.282	0.574136
ENSG00000174963	ZIC4	0.013	0.457	0.232	0.024	0.011	0	0.004	0.001	0	0	0	0	0.001	0.003	0.001	0.004	0	0	0.013	0.014	0.574016
ENSG00000148948	LRRC4C	0.151	0.541	3.447	0.013	0.008	1.277	0.637	1.614	0	0	0	0	0.199	0.016	0	0.143	0.611	0.052	0.036	0.132	0.573856
ENSG00000136937	NCBP1	21.432	32.115	14.235	16.053	12.025	22.558	15.721	15.707	24.178	8.597	15.443	19.838	11.772	20.129	9.344	10.738	8.486	12.573	9.903	7.194	0.573805
ENSG00000082898	XPO1	52.571	77.332	32.617	26.249	12.668	47.589	32.639	32.496	31.884	9.125	16.042	20.562	18.822	29.567	14.707	14.668	19.558	28.861	15.81	20.6	0.573758
ENSG00000134779	C18orf10	67.785	89.146	355.18	109.06	125.778	46.224	23.762	25.149	118.614	157.559	15.198	168.985	12.037	153.172	117.792	22.999	26.084	16.135	42.908	16.659	0.57354
ENSG00000115507	OTX1	1.4	0.492	13.213	0.072	0.19	0.006	0.004	0.009	0.196	0.331	0.009	0.18	0.105	0.005	0.009	0.067	0.429	0.004	0.134	0.185	0.573465
ENSG00000090932	DLL3	43.497	5.751	67.152	0.696	0.971	0.135	0.217	0.516	0.809	42.098	0.019	1.793	0.595	0.076	0.749	0.355	0.027	0.007	0.031	0.059	0.573396
ENSG00000175229	GAL3ST3	18.925	11.599	8.367	0.039	0.048	0.385	0.012	0.151	0	0.031	0.018	0	0.278	0.002	0.177	0.36	0.006	0.347	0	0.468	0.573301
ENSG00000166803	KIAA0101	27.065	49.679	16.195	20.976	31.781	13.709	6.46	7.043	7.356	18.25	1.043	18.854	0.043	21.869	10.115	0.376	9.363	0.162	16.452	1.001	0.57284
ENSG00000124422	USP22	82.781	133.725	149.66	90.38	93.371	66.823	43.758	47.243	68.529	116.797	48.236	104.227	39.719	97.096	137.013	45.35	34.847	58.641	50.275	29.83	0.572804
ENSG00000100814	CCNB1IP1	52.994	49.871	40.424	29.101	5.196	43.877	16.472	16.578	19.111	20.636	7.189	13.57	20.744	11.203	11.817	11.749	15.247	28.719	19.781	20.758	0.572661
ENSG00000169783	LINGO1	48.892	23.075	40.515	0.028	0.081	0.01	2.387	8.415	0.005	38.889	0	0.008	0.042	0.012	0.146	2.205	1.023	1.458	0.28	1.168	0.572555
ENSG00000108349	CASC3	40.567	55.844	85.504	41.922	39.393	35.474	27.315	30.275	17.563	27.807	41.967	20.847	38.365	25.265	42.014	43.602	30.383	21.564	42.697	33.645	0.57249
ENSG00000127423	C1orf135	10.81	11.598	1.305	3.492	3.936	7.383	5.196	5.603	6.137	2.226	3.182	8.081	0.151	1.434	1.623	0.051	0.986	0.213	1.425	0.089	0.572347
ENSG00000123411	IKZF4	5.012	5.84	8.868	5.4	3.177	3.748	6.708	5.565	0.758	4.578	3.452	0.954	3.736	1.868	1.872	7.562	2.759	1.914	2.169	1.968	0.57229
ENSG00000213931	HBE1	0.073	0.497	6.543	0	0.012	0.17	0.661	1.843	0.071	0	0.049	0.016	0.129	0.895	0.181	0.017	0.023	0.024	0	0.114	0.572166
ENSG00000166503	NA	92.374	75.628	74.894	27.938	19.287	41.16	12.549	20.692	24.585	8.999	2.853	25.37	27.133	47.837	38.285	24.37	20.821	20.771	34.284	12.545	0.572024
ENSG00000122756	CNTFR	1.201	31.179	344.096	0.122	0.038	0	5.984	10.065	0.668	0.091	0	0.007	3.416	0.038	0.008	0.287	4.34	1.976	3.268	3.8	0.5718
ENSG00000174945	AMZ1	0.383	0.076	0.642	0.23	0.057	0.602	0.066	0.129	0.01	0.31	0.581	0.115	0.042	0.09	0.005	0.016	0.06	0.035	0.057	0.063	0.571643
ENSG00000114646	CSPG5	3.263	2.062	54.555	0.027	0.119	0.068	0.116	0.788	0.065	0.203	0.073	0.097	0.394	0.007	0.183	0.242	0.129	0.236	0.148	0.116	0.571637
ENSG00000054965	FAM168A	6.228	10.747	47.053	11.94	14.304	17.879	10.182	12.605	8.331	11.497	16.352	9.277	4.431	9.332	8.174	12.236	11.269	12.955	7.074	7.114	0.571532
ENSG00000132975	GPR12	0.057	0.015	3.856	0	0	1.746	0.019	0.513	0.006	0.002	0.017	0	0	0	0	0.073	0.024	0.03	0.024	0.015	0.571472
ENSG00000119203	CPSF3	34.845	53.599	16.111	16.282	11.357	33.816	12.795	12.481	15.727	11.252	8.073	17.831	9.995	18.901	5.992	9.546	9.212	10.406	12.634	6.669	0.571299
ENSG00000122584	NXPH1	0.358	0.235	7.044	0	0	0	0.046	0.023	0	0	0	0	0.005	0	0	0	0.008	0	0	0	0.571171
ENSG00000144554	FANCD2	18.842	25.253	4.099	4.056	4.144	3.97	3.63	3.337	3.848	3.253	4.414	5.623	0.299	3.569	3.283	0.302	1.641	0.167	1.091	0.79	0.571123
ENSG00000122966	CIT	8.919	9.546	6.866	14.147	12.997	0.978	2.221	2.532	1.952	3.551	0.412	6.753	0.015	6.287	6.454	1.484	1.849	0.133	2.152	0.194	0.571059
ENSG00000159131	GART	31.618	33.017	9.79	22.909	13.196	16.272	10.809	11.37	12.477	10.467	4.852	7.584	18.042	4.594	3.807	6.506	6.449	11.866	11.122	6.11	0.571052
ENSG00000102384	CENPI	6.49	12.066	3.555	4.203	5.522	0.914	1.674	1.691	3.549	2.678	0.215	6.183	0.004	4.227	4.192	0.043	0.752	0.232	1.235	0.154	0.571016
ENSG00000204611	ZNF616	11.165	12.591	5.897	2.918	1.176	5.042	7.375	5.625	5.858	1.002	0.732	2.612	2.305	4.073	1.38	4.018	2.732	2.09	3.003	2.064	0.57099
ENSG00000068097	HEATR6	8.706	13.985	12.875	13.532	8.872	12.168	6.23	7.124	10.02	5.462	9.276	12.57	3.447	11.65	10.435	9.667	6.443	5.493	3.851	5.846	0.570944
ENSG00000136122	BORA	7.905	13.897	3.634	6.106	1.209	11.703	6.02	5.14	3.783	1.862	5.086	2.859	0.819	1.981	2.355	1.779	3.115	0.839	3.576	1.55	0.570844
ENSG00000186446	ZNF501	1.715	3.019	3.33	3.498	0.653	2.27	2.464	2.622	1.63	0.444	0.244	0.495	1.035	2.133	0.74	1.426	1.332	1.693	1.552	1.016	0.570831
ENSG00000118058	MLL	9.755	9.596	50.917	14.477	12.476	25.886	10.861	10.419	5.576	3.071	28.064	7.371	22.888	7.64	8.138	15.393	6.047	4.124	2.993	9.667	0.57071
ENSG00000108702	CCL1	0	0	0.109	0	0	0.021	0.011	0	0	0	0	0	0	0.012	0	0	0	0	0	0	0.570526
ENSG00000137770	CTDSPL2	10.602	13.522	9.953	4.316	3.387	14.689	10.465	10.412	4.555	2.202	13.531	5.388	8.448	7.906	4.327	5.179	3.724	2.94	4.071	2.68	0.570447
ENSG00000060718	COL11A1	16.563	5.058	9.433	0.301	0.233	0	1.114	1.712	0.019	6.023	0	0.001	0.383	0.322	0.003	0.178	0.635	0	0	0.279	0.570343
ENSG00000175697	GPR156	0.848	0.457	1.045	0.195	0.215	0.018	0.109	0.136	0.073	0.024	0.085	0.103	0.137	0.162	0.079	0.058	0.67	0.04	0.021	0.04	0.570206
ENSG00000104517	UBR5	20.674	24.621	21.009	12.377	6.172	27.591	11.946	13.157	16.655	2.658	20.871	11.788	21.649	15.649	8.765	9.067	11.161	6.995	7.215	8.985	0.56997
ENSG00000152503	TRIM36	2.945	5.036	17.974	0.079	0.066	0.02	0.39	0.886	0.797	0.135	0.219	1.248	4.381	0.138	0.144	0.333	0.2	0.081	4.15	0.524	0.569887
ENSG00000169258	GPRIN1	7.752	10.295	33.229	3.692	14.358	0.08	6.605	4.984	4.367	29.865	0.56	4.155	0.494	2.878	2.917	7.186	0.469	0.314	0.568	1.472	0.569855
ENSG00000198597	ZNF536	0.007	0.181	9.356	2.349	1.585	0	1.122	1.665	0	0.679	0	0	0.043	0.041	0	0.079	1.691	0.425	0.353	0.121	0.569817
ENSG00000215784	FAM72D	8.773	8.092	1.838	3.312	1.981	0.483	0.929	0.95	1.508	1.181	0.7	2.065	0.061	1.282	0.983	0.135	1.128	0.082	0.728	0.254	0.56976
ENSG00000119285	HEATR1	24.156	34.384	6.576	18.912	10.183	30.671	15.571	16.086	15.852	5.316	19.404	14.091	15.277	15.171	7.204	6.378	5.252	5.912	3.835	5.53	0.569724
ENSG00000146352	CLVS2	0.429	0.995	19.708	0.008	0.054	0	0.026	0.344	0	0	0	0	0.003	0.002	0	0.037	0.06	0.005	0	0.009	0.569654
ENSG00000100714	MTHFD1	56.396	61.648	16.267	27	29.048	30.305	16.838	16.247	23.55	21.949	8.245	34.475	12.773	20.682	9.005	9.771	12.527	19.1	11.42	8.465	0.569491
ENSG00000118816	CCNI	123.447	134.236	532.246	191.874	140.335	265.47	128.788	116.612	103.847	176.492	231.376	131.803	272.712	113.71	62.115	207.537	100.403	81.654	157.289	44.995	0.569181
ENSG00000142945	KIF2C	33.02	35.324	18.549	31.245	16.172	2.101	5.628	5.091	8.543	19.373	0.714	30.749	0.198	15.632	19.658	0.194	3.327	0.418	2.434	0.233	0.569144
ENSG00000131409	LRRC4B	8.132	9.374	117.704	0.2	0.208	0.264	2.197	4.411	0.002	11.646	1.952	0.01	0.289	0.019	0.106	2.739	5.713	0.946	2.226	1.651	0.568487
ENSG00000131153	GINS2	24.189	34.057	12.691	7.762	24.591	6.719	6.303	6.115	6.847	14.949	0.756	23.709	0.104	9.385	9.55	2.821	2.706	0.31	5.651	0.893	0.568435
ENSG00000148143	ZNF462	22.022	24.24	13.63	4.754	4.24	1.909	6.04	5.61	4.925	1.815	0.174	6.326	10.307	3.556	3.856	7.25	4.551	4.926	0.744	2.396	0.568357
ENSG00000196550	FAM72A	9.099	7.07	2.188	3.128	2.21	0.546	0.963	1.154	1.878	1.575	1.056	3.24	0.081	1.241	1.268	0.191	1.222	0.134	0.666	0.36	0.56821
ENSG00000181965	NEUROG1	0.018	0.065	0.904	0	0	0	0	0	0	0	0	0	0.076	0	0	0	0.008	0	0	0	0.568198
ENSG00000141431	ASXL3	0.396	2.442	15.97	0.453	0.081	0.238	2.388	1.506	0.002	0	0.003	0	0.194	0.067	0.073	2.166	0.368	0.437	0.481	0.5	0.567926
ENSG00000083093	PALB2	12.267	16	3.722	7.509	4.322	7.211	9.192	8.302	9.345	3.54	3.529	7.411	3.96	4.724	2.901	3.683	4.082	2.052	4.693	1.873	0.567894
ENSG00000171044	XKR6	2.217	1.591	2.203	0.741	0.345	0.809	0.833	0.929	0.813	0.571	0.985	0.922	2.114	0.366	0.881	0.714	0.515	0.318	0.496	0.982	0.567855
ENSG00000122565	CBX3	69.188	84.264	52.354	19	13.846	85.793	43.302	48.991	36.104	16.066	24.703	29.002	20.501	36.909	15.634	13.534	24.224	21.596	44.012	18.563	0.567522
ENSG00000184194	GPR173	3.177	3.212	50.612	5.565	2.602	6.092	2.198	4.847	0.104	2.535	0.246	0.239	0.954	2.701	11.709	4.128	0.629	0.611	0.672	1.074	0.567453
ENSG00000241563	CORT	1.915	1.505	46.673	0.807	0.833	1.233	1.397	1.128	0.255	0.811	1.08	0.359	0.13	0.119	0.42	0.796	0.684	0.171	0.572	1.068	0.567357
ENSG00000137766	UNC13C	0.044	0.07	2.548	0	0.001	0.002	0.107	0.278	0.005	0	0.005	0.013	0.005	0.001	0	0.006	0.011	0.004	0.015	0.004	0.567123
ENSG00000135577	NMBR	0.062	0.11	2.435	0.029	0	0	0.022	0.057	0.019	0.016	0	0.035	0.036	0.035	0.027	0.015	0.025	0	0	0	0.566664
ENSG00000198028	ZNF560	0.21	0.549	0.377	0.475	0.478	0.028	0.042	0.045	0.094	0	0.033	0.042	0.013	0.661	0.025	0.017	0.011	0.025	0	0.009	0.566296
ENSG00000161681	SHANK1	0.508	1.014	5.981	0.503	1.186	0.883	0.288	0.774	0.083	4.474	0.445	0.012	0.277	0.304	0.184	0.128	0.099	0.039	0.321	0.121	0.566276
ENSG00000089022	MAPKAPK5	12.049	13.107	8.535	11.637	6.422	13.547	13.313	12.166	11.322	3.697	10.653	11.131	9.151	8.723	7.132	7.04	5.077	5.679	7.809	4.989	0.566163
ENSG00000034053	APBA2	4.18	8.129	26.916	8.886	9.432	0.877	0.557	1.132	2.706	14.455	21.122	0.055	0.107	4.185	3.025	0.229	1.203	0.086	0.522	5.994	0.566116
ENSG00000183960	KCNH8	1.853	1.229	13.358	0.009	0.002	1.318	0.261	1.262	0.007	0.024	1.404	0.007	2.858	0	0.008	0.678	0.092	0.018	0.486	1.421	0.566052
ENSG00000160062	ZBTB8A	9.67	10.321	11.41	3.484	2.96	17.135	4.842	5.814	4.855	2.394	0.384	6.452	1.164	6.089	3.97	4.152	4.09	2.217	3.401	3.168	0.565983
ENSG00000110900	TSPAN11	1.423	2.626	12.789	0.067	0.106	0.158	1.802	3.948	0	0.464	0.001	0.019	0.063	0.024	1.56	0.38	1.228	0.422	1.584	0.347	0.565943
ENSG00000162702	ZNF281	45.091	48.298	7.923	15.083	8.764	24.544	11.294	10.971	10.79	4.171	20.877	8.969	18.027	10.274	5.177	8.598	2.648	3.814	3.763	2.687	0.565907
ENSG00000125944	HNRNPR	27.997	49.944	34.478	21.271	16.775	41.795	31.119	31.465	29.888	13.022	23.209	23.541	29.504	37.16	17.719	20.617	17.314	21.095	24.431	12.01	0.565905
ENSG00000111530	CAND1	22.452	39.836	21.317	8.941	6.343	20.927	24.351	24.378	21.115	7.739	11.405	18.081	17.892	25.929	9.671	14.323	8.013	5.543	7.863	6.061	0.565851
ENSG00000077809	GTF2I	40.151	55.093	57.409	11.694	10.245	44.768	32.182	36.7	14.685	12.184	20.596	13.891	19.492	20.537	13.379	38.204	17.896	11.468	21.323	24.398	0.565703
ENSG00000137343	ATAT1	7.974	8.147	149.096	5.113	3.525	8.172	9.043	11.167	1.993	4.817	4.456	1.541	6.706	2.334	8.74	9.183	3.529	1.535	3.272	5.667	0.565678
ENSG00000127561	SYNGR3	15.3	4.631	13.801	2.435	1.084	0.581	0.281	2.3	0.15	2.393	1.018	0.313	0.81	2.433	1.313	5.361	0.796	1.658	0.063	0.816	0.56556
ENSG00000082516	GEMIN5	14.768	23.252	7.922	12.367	8.452	9.155	7.666	8.201	12.4	4.067	2.52	13.568	7.619	7.516	7.186	6.163	5.29	7.338	3.24	3.315	0.5654
ENSG00000069188	SDK2	1.659	8.656	7.543	0.157	0.064	3.115	0.713	0.592	2.785	0.007	1.586	5.867	2.113	0.01	0.002	0.736	0.7	1.728	0.696	0.134	0.565325
ENSG00000125885	MCM8	17.494	19.872	4.339	6.835	8.248	7.791	8.723	9.333	4.438	2.676	1.816	7.442	4.017	5.545	2.811	2.626	4.045	3.979	4.38	2.932	0.565292
ENSG00000162188	GNG3	3.032	4.984	172.551	0.242	0.06	2.598	1.172	6.659	0.006	0.066	0.924	0.058	0.182	0.042	0.03	0.318	0.445	0.078	0.141	0.231	0.565238
ENSG00000143195	ILDR2	0.25	6.927	8.287	0.008	0.031	0.035	0.163	0.709	0.002	0.109	0.325	0.024	0.028	0.016	0	1.795	0.352	1.714	0.073	0.137	0.565213
ENSG00000072182	ACCN4	0.053	0.153	1.85	0.013	0	0.077	0.037	0.361	0.002	0	0.009	0.033	0.142	0	0.002	0.059	0.03	0.017	0.012	0.098	0.565162
ENSG00000152455	SUV39H2	16.533	24.571	6.248	3.393	3.116	8.57	4.692	5.13	3.621	3.163	1.126	5.652	2.977	4.829	2.312	1.906	1.57	1.65	5.407	1.473	0.565108
ENSG00000104901	DKKL1	3.048	1.031	1.736	0.249	0.052	0	0.276	0.326	0.035	0.249	0	0.204	0.259	0.146	0.304	0.075	0.216	0.078	0.105	0.183	0.564936
ENSG00000198914	POU3F3	0.05	3.431	62.561	0.072	0.026	0	0.029	0.006	0	0	0.005	0	0.011	0.004	0	0.003	0.037	0.021	0	0.016	0.564819
ENSG00000149269	PAK1	49.736	44.552	14.929	15.305	15.466	12.78	18.52	22.759	24.444	9.619	16.804	28.2	5.892	15.085	1.86	8.121	8.216	1.026	14.781	7.811	0.564609
ENSG00000125533	BHLHE23	0.058	0.044	0.152	0	0	0.209	0.004	0	0	0	0.043	0	0	0	0	0	0	0	0	0	0.56441
ENSG00000177807	KCNJ10	1.061	0.383	21.584	0	0	0.034	0.158	0.143	0	0.33	0.042	0.003	0.008	0.001	0.001	0.009	0.016	0.024	0.122	0.01	0.564209
ENSG00000151490	PTPRO	0.787	0.628	15.817	0.056	0.048	0.075	0.218	0.541	0.056	0.013	0.942	0.033	0.002	0.086	0	0.125	0.247	0.116	0.412	0.076	0.564144
ENSG00000184156	KCNQ3	1.129	0.662	11.449	0.085	0.096	0	0.047	0.737	0.072	0	0.096	0.007	0.334	0.175	0.001	0.721	0.1	0.324	0.101	0.22	0.563979
ENSG00000198216	CACNA1E	0.183	0.162	7.736	0	0.001	0.005	0.111	0.872	0.002	0	0.01	0	0.002	0.002	0.001	0.012	0.005	0.038	0.014	0.025	0.563834
ENSG00000198822	GRM3	1.048	1.787	48.079	0	0	0.032	0.055	0.102	0	0	0.072	0	0	0	0	0.116	0.011	0.011	0.029	0	0.563821
ENSG00000128683	GAD1	0.05	3.146	54.439	0.006	0.074	0.448	0.021	0.063	1.177	0.017	0	0.076	0.093	0.013	0.083	0.372	0.311	0.012	0.094	0.31	0.563793
ENSG00000110076	NRXN2	1.953	1.826	38.282	0.251	0.301	0.455	1.576	3.067	0.001	0.028	0.189	0.006	0.181	0.046	0.002	0.286	2.324	0.069	0.286	1.074	0.563643
ENSG00000198929	NOS1AP	1.901	2.434	6.871	0.082	0.154	0.105	1.28	1.768	0.015	0.226	0.015	0.176	2.316	0.033	0.56	0.415	0.467	0.652	1.112	1.153	0.563609
ENSG00000165309	ARMC3	0.036	0.143	0.079	0	0	0.118	0.007	0.071	0.002	0.004	0.04	0.009	0.006	0	0	0.015	0.003	0.005	0	0.03	0.563596
ENSG00000121390	PSPC1	38.447	39.674	22.523	22.077	12.368	28.634	15.469	17.646	17.041	6.26	20.497	20.302	33.007	21.704	12.786	12.357	13.388	10.429	12.961	14.349	0.56351
ENSG00000176302	FOXR1	0.01	0.025	0.114	0	0	0.077	0.069	0.031	0	0	0.098	0	0.015	0.005	0	0	0	0	0	0	0.56319
ENSG00000123473	STIL	9.263	14.513	5.183	6.379	6.416	2.573	2.406	2.196	4.982	2.826	0.894	10.456	0.821	5.809	6.967	0.515	0.906	0.215	1.122	0.56	0.563173
ENSG00000117569	PTBP2	18.02	26.875	34.35	3.974	2.83	17.593	8.994	12.824	3.118	0.946	7.602	2.426	16.088	7.037	2.947	6.235	15.502	5.255	4.139	14.604	0.563152
ENSG00000126216	TUBGCP3	7.351	11.302	12.038	10.659	9.943	16.099	7.614	7.858	7.319	7.022	13.868	9.057	5.407	7.832	11.12	5.342	7.094	5.147	6.471	6.403	0.563099
ENSG00000089280	FUS	172.626	223.645	81.547	105.799	179.774	95.712	102.488	117.13	68.936	74.078	88.087	100.015	98.232	72.132	119.488	49.243	58.512	48.536	73.79	99.27	0.562968
ENSG00000186812	ZNF397	12.58	9.468	13.634	2.893	0.642	10.975	12.627	13.602	2.594	0.832	2.567	1.509	2.864	1.876	0.428	2.872	4.274	4.583	4.621	4.121	0.562946
ENSG00000168959	GRM5	0.118	0.045	2.099	0.009	0.007	0	0.04	0.193	0.001	0.037	0	0.003	0.003	0.006	0.082	0.009	0.007	0.007	0.015	0.033	0.562888
ENSG00000113810	SMC4	49.522	41.212	23.616	17.897	12.485	51.188	16.898	17.001	8.881	3.356	9.81	10.256	4.048	15.343	6.267	4.692	27.249	5.995	8.124	6.382	0.562782
ENSG00000163285	GABRG1	0.738	0.082	0.661	0	0	0	0.011	0.024	0	0	0	0	0	0	0	0.102	0.016	0	0	0	0.562776
ENSG00000198885	ITPRIPL1	8.109	4.636	3.805	1.558	2.592	4.896	0.864	0.81	0.334	5.56	5.994	0.12	1.969	1.041	1.943	0.266	0.812	0.553	0.362	0.609	0.562512
ENSG00000063015	SEZ6	5.089	1.784	38.138	0	0.001	0.264	0.507	1.633	0	0.005	0.8	0	0.002	0	0	4.566	0.018	0.003	0.143	0.484	0.562237
ENSG00000183530	PRR14L	13.527	14.21	8.134	6.919	5.026	9.363	12.393	11.024	7.156	3.469	9.344	6.958	4.76	6.541	6.407	8.636	5.454	4.82	3.666	5.128	0.562033
ENSG00000100129	EIF3L	94.273	158.074	477.101	158.58	84.985	379.681	152.314	153.635	176.841	115.504	171.178	225.109	101.749	130.06	190.876	132.971	72.366	68.62	169.075	65.022	0.561487
ENSG00000139200	C12orf53	10.641	4.01	67.951	2.199	1.332	0.06	0.949	2.869	0.004	0.637	0.346	0.004	0.861	0.418	0.072	9.399	3.236	0.17	0.512	0.857	0.561458
ENSG00000101134	DOK5	4.386	4.557	33.52	7.392	3.225	0.416	0.368	1.478	0	0.972	0	0	10.343	10.814	2.243	0.485	1.061	3.325	1.388	0.35	0.561169
ENSG00000205726	ITSN1	9.426	9.579	9.949	6.486	4.479	0.456	4.661	4.707	5.014	0.764	1.192	3.772	1.476	6.705	7.059	2.456	3.831	4.409	3.55	2.222	0.561165
ENSG00000129696	TTI2	9.282	8.891	5.803	4.921	4.717	4.087	4.616	4.301	3.808	5.173	3.777	4.648	6.107	3.056	6.408	3.701	3.198	3.97	4.568	2.766	0.561121
ENSG00000174442	ZWILCH	34.398	45.228	11.202	13.491	9.375	13.733	8.215	7.825	18.146	4.909	3.038	18.341	1.422	17.954	7.778	2.701	5.424	3.263	7.581	2.376	0.561037
ENSG00000099995	SF3A1	42.936	46.301	70.476	41.179	86.365	49.903	31.452	30.269	11.973	68.844	66.462	14.927	62.318	9.72	12.273	43.388	20.579	15.311	18.096	15.703	0.560999
ENSG00000165164	CXorf22	0.015	0.064	0.352	0	0	0.063	0.049	0.02	0.003	0	0	0	0.003	0	0	0.103	0	0	0	0.007	0.560854
ENSG00000237515	SHISA9	9.93	6.061	3.027	3.889	6.94	0.017	0.073	0.818	0.179	0.003	0.025	6.008	0.637	0.005	0.003	0.166	0.063	0.046	0.026	0.021	0.56072
ENSG00000184949	NA	0.698	0.847	1.531	0.261	0.089	1.218	0.33	0.633	0.436	0.038	0.024	0.253	0.464	0.137	0.45	0.635	0.159	0.153	0.149	0.621	0.560537
ENSG00000101282	RSPO4	4.157	3.155	0.723	3.969	4.505	0.154	0.107	0.196	0.002	0.009	0.084	0.029	0.365	0.003	0	0.219	0.064	0.018	0	0.126	0.560514
ENSG00000165259	HDX	2.402	3.252	2.595	0.719	0.413	0.707	0.768	0.894	0.709	0.228	0.3	0.457	2.68	1.26	0.615	1.507	0.485	0.179	0.234	0.378	0.560203
ENSG00000116106	EPHA4	1.803	16.465	16.436	1.233	1.746	0.077	1.096	1.668	5.083	0.051	4.356	0.661	1.174	5.853	5.838	1.611	3.16	2.625	0.447	0.913	0.559839
ENSG00000135597	REPS1	11.104	12.163	13.599	14.656	8.205	13.032	7.792	7.673	12.891	5.575	12.825	13.118	9.182	6.199	5.102	11.185	5.966	11.245	4.347	4.186	0.559761
ENSG00000131115	ZNF227	6.8	8.492	11.597	4.269	1.754	13.989	8.833	8.196	4.614	1.622	6.056	3.087	7.045	5.243	2.391	6.17	3.511	3.711	4.318	2.845	0.559729
ENSG00000156876	SASS6	8.878	9.947	2.696	1.934	1.853	5.249	3.502	3.995	1.58	0.926	2.17	1.459	1.295	0.987	0.417	1.798	2.392	1.368	1.506	1.567	0.559513
ENSG00000118260	CREB1	10.351	12.895	11.137	4.743	2.571	15.754	12.414	12.95	7.433	3.016	9.3	5.107	6.151	6.915	4.527	5.845	5.218	4.361	6.203	3.699	0.559387
ENSG00000196227	C20orf177	13.432	13.385	7.077	2.933	2.509	5.907	10.259	9.276	6.18	3.559	7.06	6.54	1.042	5.013	2.441	3.908	3.624	5.355	2.446	2.442	0.559086
ENSG00000236279	CLEC2L	0.146	0.045	2.108	0	0	0.034	0.071	0.61	0	0	0.234	0	0.017	0.002	0	0.035	0.014	0.016	0.051	0.062	0.559063
ENSG00000174460	ZCCHC12	0.36	0.659	25.272	0.021	0.019	0.019	0.176	5.803	0	0.034	0.102	0.013	0.098	0.029	0.156	0.104	0.106	0.043	0.116	0.054	0.559026
ENSG00000196990	FAM163B	0.168	0.227	4.462	0	0	0	0	0	0	0	0	0	0	0	0	0.02	0.125	0	0	0.097	0.558894
ENSG00000126861	OMG	0	0	13.284	0.028	0	1.23	0.094	0.177	0	0.014	1.718	0	0	0	0	0.009	0.075	0.013	0	0	0.558759
ENSG00000157219	HTR5A	0.018	0	0.299	0	0	0	0	0.023	0	0	0	0	0.013	0	0	0	0.005	0	0	0	0.558651
ENSG00000146670	CDCA5	27.123	37.434	11.54	13.702	34.398	3.496	5.476	4.635	4.301	19.635	0.601	20.806	0.438	5.977	10.516	0.305	2.274	0.386	6.661	0.283	0.558486
ENSG00000141858	SAMD1	70.12	47.934	77.653	24.175	56.882	21.921	15.881	17.329	6.113	44.792	13.292	12.374	8.435	6.795	9.8	15.445	31.496	31.097	32.841	28.021	0.558418
ENSG00000146918	NCAPG2	19.791	26.42	7.109	13.339	8.146	5.839	4.148	4.499	5.983	6.107	2.212	14.285	0.715	12.079	8.676	1.099	3.173	1.447	3.466	1.285	0.558211
ENSG00000166748	AGBL1	0.003	0.009	0.608	0	0	0	0.023	0.015	0	0.01	0	0.007	0	0	0	0	0	0	0	0	0.558144
ENSG00000140557	ST8SIA2	1.893	3.489	61.48	0.002	0.079	0.004	0.378	1.274	0.136	1.743	0	0.097	10.523	0.002	0.153	0.018	0.018	0.834	0.021	0	0.558139
ENSG00000147246	HTR2C	1.064	0.512	0.435	0	0	0	0.002	0	0.001	0	0	0	0.003	0	0	0	0.003	0.001	0	0	0.557879
ENSG00000203930	NA	1.32	0.565	58.936	0.687	0.626	0.039	0.47	1.231	0.111	0.926	0	0.004	0.051	0.967	0.469	0.175	0.035	0.123	0.031	0.191	0.557872
ENSG00000165566	FAM123A	0.128	0.511	15.422	0	0	0.003	0.015	0.233	0	0.007	0	0	0.005	0	0	0.148	0.007	0	0	0.005	0.557841
ENSG00000139767	SRRM4	0.787	0.945	38.681	0	0	0.018	0.086	1.073	0	0	0	0	0.004	0.001	0.004	0.062	0.033	0.213	0.285	0.006	0.557754
ENSG00000183150	GPR19	12.189	9.431	5.233	0.181	0.349	0.376	0.243	0.533	0.095	2.015	0.343	0.399	0.377	0.139	0.305	2.116	0.129	0.012	0.148	0.263	0.557729
ENSG00000120539	MASTL	28.408	32.857	7.146	8.452	9.722	4.344	5.202	4.93	8.632	4.645	6.586	8.304	7.816	6.219	4.639	3.918	4.628	1.784	4.093	2.598	0.557648
ENSG00000144369	FAM171B	18.711	9.436	27.304	2.253	1.736	8.02	2.388	5.392	1.96	1.262	0.109	1.339	1.524	17.123	3.135	10.194	1.656	0.703	1.851	1.437	0.557372
ENSG00000177602	GSG2	13.677	11.022	3.805	4.08	11.726	0.825	1.722	1.855	2.892	6.253	0.468	7.849	0.241	2.534	2.847	0.084	0.349	0.696	1.095	0.046	0.557293
ENSG00000197111	PCBP2	74.512	115.193	200.131	153.279	138.449	154.66	101.475	92.699	41.856	156.187	120.813	36.985	105.797	47.381	78.798	111.448	68.477	51.959	117.361	80.321	0.557282
ENSG00000185942	NKAIN3	0.176	0.187	10.737	0	0.005	0.002	0.336	0.171	0	0.111	0.006	0	0.005	0	0	0.005	0.024	0.011	0.132	0.009	0.557099
ENSG00000198720	ANKRD13B	14.721	8.337	84.63	5.28	6.835	7.658	1.153	3.468	3.563	15.645	0.922	6.291	5.091	1.555	19.398	2.938	5.508	6.061	3.61	5.299	0.556578
ENSG00000169840	GSX1	0	0.49	15.247	0	0	0	0	0	0	0	0	0	0	0	0	0.01	0	0	0	0	0.556383
ENSG00000106443	PHF14	13.191	13.049	17.539	4.467	1.902	16.691	6.693	7.249	4.467	0.893	4.355	3.908	10.223	5.37	2.855	6.462	5.209	4.317	8.41	5.438	0.55625
ENSG00000197299	BLM	16.171	21.445	3.46	2.034	2.93	6.723	2.336	1.987	1.589	2.023	1.453	3.263	0.025	1.664	1.424	0.213	0.72	2.654	0.675	0.155	0.556204
ENSG00000151806	GUF1	26.59	20.724	12.305	14.95	6.04	21.991	15.395	16.042	14.081	5.699	12.019	10.242	3.53	13.312	3.787	10.038	7.374	9.996	10.817	5.27	0.555949
ENSG00000188536	HBA2	1.391	0.45	3575.3	0.149	0.1	16.725	147.252	459.441	0.041	2.973	187.221	0.273	0.179	0.126	0.013	1.095	2.966	17.099	9.502	3.738	0.555789
ENSG00000114346	ECT2	27.474	41.08	9.717	17.041	9.961	4.326	6.784	6.839	13.868	6.7	0.797	15.13	3.491	19.515	5.362	2.106	2.169	2.439	7.712	0.961	0.555592
ENSG00000183024	OR1G1	0.04	0	0.069	0	0	0.032	0	0	0	0	0	0	0	0	0	0	0.021	0	0	0	0.55549
ENSG00000152092	ASTN1	1.924	1.391	33.097	0.114	0.094	0.002	0.078	1.572	0.059	0.003	0	0.135	0.085	0.057	0.007	2.601	0.076	0.126	0.014	0.163	0.555423
ENSG00000053438	NNAT	53.111	81.778	3604.75	0.333	0.133	3.073	11.83	44.011	0.601	4.26	6.077	0.814	1.226	1.075	29.684	1.208	21.488	0.496	7.333	0.916	0.555377
ENSG00000206172	HBA1	1.32	0.147	3574.09	0.346	0.156	12.503	127.708	405.205	0.036	2.212	153.791	0.359	0.117	0.173	0.039	0.902	2.02	11.315	5.953	2.514	0.555376
ENSG00000197008	ZNF138	17.58	12.565	11.46	1.352	1.077	11.279	5.233	4.973	2.992	0.333	4.374	1.399	2.277	2.135	1.09	3.585	4.537	2.129	4.528	5.416	0.55535
ENSG00000148219	ASTN2	2.335	2.718	4.609	0.926	1.061	0.12	2.547	2.348	0.126	1.938	0.142	0.081	2.245	0.523	0.236	0.703	0.503	0.631	1.791	1.815	0.555289
ENSG00000066032	CTNNA2	1.894	2.156	28.969	0	0	0.005	0.352	2.346	0	0.028	0.019	0	0.001	0.001	0.001	3.292	0.333	0.007	0.035	0.484	0.555233
ENSG00000139445	FOXN4	0.201	0.175	11.277	0	0	0.008	0.014	0.077	0	0.007	0	0.002	0.04	0.001	0	0.017	0.017	0	0	0.006	0.555159
ENSG00000114026	OGG1	8.147	8.171	27.493	17.441	19.657	5.334	26.567	26.651	5.187	12.444	6.695	7.439	2.518	6.883	12.657	4	5.895	4.319	8.366	6.843	0.555096
ENSG00000125821	DTD1	23.142	20.467	38.773	40.722	27.592	19.907	4.461	4.995	25.778	21.822	8.701	35.858	4.783	25.658	18.055	12.1	7.29	8.631	15.433	5.96	0.554996
ENSG00000167513	CDT1	43.141	50.479	52.648	23.808	79.38	15.189	9.348	8.433	2.246	98.057	1.988	11.155	1.114	2.369	10.479	1.047	5.807	0.264	6.423	0.771	0.554774
ENSG00000205927	OLIG2	0.692	0.165	25.674	0.014	0	0.003	0.008	0.003	0	0	0.095	0	0	0	0.003	0	0	0	0	0	0.554705
ENSG00000110881	ACCN2	1.127	2.094	27.328	0.929	1.638	0.033	0.863	1.828	3.966	3.966	1.312	4.353	0.11	1.707	0.498	0.696	2.268	0.33	1.297	0.433	0.554695
ENSG00000197921	HES5	0.033	2.197	35.333	0.018	0.143	0.059	0.137	0.197	0.374	0.761	0.078	0.017	0.631	0	0.033	0.23	1.081	0.588	0	0.17	0.55455
ENSG00000005513	SOX8	4.15	3.785	98.156	1.409	1.008	0.025	1.365	2.448	0.035	0.67	0.391	0	0.628	0.015	0.626	0.705	1.096	0.598	0.762	5.752	0.554527
ENSG00000153404	PLEKHG4B	6.402	7.847	2.409	0.042	0.008	1.131	0.149	0.786	0.014	0.013	0.002	0.004	0.798	0.022	0	0.084	0.149	0.002	0.843	0.162	0.554488
ENSG00000085840	ORC1	24.49	38.617	7.194	4.009	15.324	7.225	3.459	2.896	4.361	8.618	2.002	17.934	0.984	5.304	6.442	0.251	0.988	0.228	1.517	0.548	0.554357
ENSG00000173611	SCAI	4.404	4.352	5.783	1.474	1.154	10.99	2.281	2.481	1.357	0.768	3.556	0.857	1.411	3.058	1.146	2.236	0.729	0.896	0.497	0.68	0.554338
ENSG00000024526	DEPDC1	16.096	19.57	3.737	9.56	4.29	0.801	3.577	3.039	3.541	3.843	0.1	8.792	0.006	6.731	3.637	0.019	1.806	0.038	1.378	0.013	0.554331
ENSG00000197587	DMBX1	0.081	0.654	0.283	0.008	0	0.004	0	0	0	0.092	0	0	0.04	0	0	0	0	0.006	0.045	0	0.55403
ENSG00000198732	SMOC1	1.117	7.474	52.881	5.892	3.035	0.001	0.923	0.365	5.416	4.806	0.031	6.952	0.2	0.024	0.555	8.278	0.458	0.823	1.758	4.048	0.55402
ENSG00000154839	SKA1	12.631	16.653	5.393	16.29	16.528	0.924	3.244	2.321	4.229	4.322	0.333	9.575	0.06	6.089	8.329	0.196	1.87	0.232	2.976	0.311	0.55392
ENSG00000064547	LPAR2	25.6	18.564	123.725	2.084	0.779	7.645	2.219	3.258	5.115	2.032	37.614	10.643	6.712	0.291	2.175	5.831	4.565	0.217	11.867	20.692	0.553905
ENSG00000183570	PCBP3	1.803	1.518	9.115	3.455	1.667	1.529	0.282	1.982	0.085	1.729	0.541	0.022	0.892	0.206	0.025	3.337	0.81	0.549	1.585	1.319	0.553819
ENSG00000115266	APC2	0.089	0.956	58.049	0.325	0.083	0.329	0.507	2.373	0.012	0.12	0.686	0.024	0.095	0.012	0.013	0.094	0.234	0.074	0.254	0.371	0.553775
ENSG00000214338	C6orf174	5.248	4.589	48.251	0.529	0.327	0.042	0.702	3.746	0.024	0.205	0.715	0.002	0.297	1.322	0.001	6.632	2.018	0.133	1.11	0.922	0.553708
ENSG00000149346	C20orf94	3.011	3.604	1.974	2.787	0.98	4.264	2.854	2.692	2.155	0.571	3.079	1.822	0.451	0.982	0.559	2.485	0.867	0.565	0.457	1.519	0.553707
ENSG00000178804	H1FOO	0.005	0	0.022	0	0	0.015	0	0	0	0	0.012	0	0	0	0	0	0	0	0	0	0.553686
ENSG00000123485	HJURP	29.906	28.328	16.339	21.395	23.685	0.764	5.351	4.995	8.305	12.662	0.413	26.503	0.005	10.731	20.265	0.022	5.489	0.051	3.511	0.214	0.553672
ENSG00000152910	CNTNAP4	0.014	0.157	8.317	0.004	0	0	0.058	1.189	0.098	0.009	0	0.514	0.006	0	0	0.032	0.057	0	0	0	0.553497
ENSG00000104177	MYEF2	16.239	16.548	19.237	1.121	0.488	12.565	3.307	5.644	0.501	0.743	2.162	0.169	1.495	1.568	3.201	11.332	1.16	2.389	2.531	6.569	0.553404
ENSG00000149187	CELF1	45.138	31.394	35.041	17.815	15.665	22.257	21.149	23.028	31.22	12.328	37.119	27.065	22.601	21.609	27.799	17.218	15.163	18.901	11.31	16.98	0.553234
ENSG00000028839	TBPL1	20.306	22.856	19.664	9.654	8.259	9.99	6.317	7.172	10.918	4.264	9.639	9.048	12.284	12.256	6.177	12.958	6.562	4.971	15.048	6.092	0.553214
ENSG00000196767	POU3F4	0.356	1.584	81.236	0	0	0	0.017	0	0	0	0	0	0	0.004	0	0	0	0	0	0.035	0.553126
ENSG00000253633	NA	0.111	0.106	3.844	0.063	0.017	0.195	0.05	0.091	0.004	0	0.037	0	0.035	0.11	0.13	0	0.007	0.008	0.262	0	0.553105
ENSG00000196367	TRRAP	12.789	17.264	20.456	23.339	21.564	18.403	13.278	12.442	6.701	11.835	27.593	11.929	11.228	10.355	18.264	11.198	8.083	6.702	4.199	14.341	0.553064
ENSG00000197283	SYNGAP1	26.748	26.796	30.231	12.527	9.097	25.282	6.616	8.189	1.51	4.593	15.277	1.937	9.112	2.095	4.178	18.736	12.498	3.128	5.526	17.632	0.55297
ENSG00000168883	USP39	31.616	37.225	31	21.637	23.057	24.733	13.675	14.527	27.421	33.528	19.295	28.021	29.726	22.186	25.183	12.004	14.887	17.136	25.121	11.394	0.552738
ENSG00000129596	CDO1	8.901	11.703	100.114	1.191	0.642	0.258	0.956	2.937	0.008	0.469	0.101	0	12.463	0.939	0.444	3.786	3.48	2.669	1.357	9.221	0.552688
ENSG00000162687	KCNT2	3.685	3.142	3.213	0.824	0.078	0.257	0.74	2.094	0.004	0.007	0	0	0.339	0.574	0.296	1.152	1.68	0.147	0.495	0.392	0.552575
ENSG00000121289	CEP89	4.045	7.27	17.037	10.297	7.067	8.487	3.744	4.516	3.766	2.316	1.635	3.962	4.751	5.378	4.296	4.204	5.743	5.182	5.434	7.272	0.552557
ENSG00000089091	DZANK1	2.084	2.232	2.15	0.787	0.335	1.53	0.586	0.836	1.085	0.229	0.885	0.863	0.828	0.452	0.51	1.309	0.802	0.388	0.503	1.442	0.552294
ENSG00000133302	ANKRD32	4.879	7.127	2.28	0.71	1.073	3.851	3.051	3.498	2.155	2.241	1.936	2.267	0.613	1.942	0.666	0.977	1.246	1.88	1.116	1.235	0.552281
ENSG00000184635	ZNF93	36.982	29.277	13.555	0.822	1.716	6.215	3.65	3.229	2.768	0.337	1.674	0.749	2.451	3.37	3.155	4.693	2.083	1.37	1.926	1.753	0.55223
ENSG00000124194	GDAP1L1	3.972	2.782	123.699	0.02	0	0.072	0.492	1.652	0	0	0.136	0	0.158	0	0	3.667	0.053	0.128	0.862	0.635	0.552036
ENSG00000129244	ATP1B2	34.045	11.121	252.206	0.021	0.04	0.089	1.27	3.241	0.002	0.639	0.379	0.004	1.413	0.018	0.01	31.797	2.57	1.248	0.233	2.364	0.552005
ENSG00000179673	RPRML	1.801	2.221	1.046	0	0.029	0.039	0.072	0.265	0	0	0.115	0	0.033	0	0.098	0.022	0.092	0.131	0.473	0.106	0.551969
ENSG00000007001	UPP2	0	0	0.784	0	0	0.02	0.102	0.048	0	0	0.008	0	0.078	0	0	0.014	0.013	0	0	0.002	0.551936
ENSG00000198738	FAM165A	0	0	0.021	0	0	0	0.01	0	0	0	0	0	0	0	0	0	0	0	0	0	0.551699
ENSG00000155087	ODF1	0	0	0.149	0	0	0	0.008	0	0	0	0	0	0	0	0	0	0	0	0	0	0.551653
ENSG00000101040	ZMYND8	43.783	37.632	20.748	54.66	42.437	21.574	12.352	11.505	23.808	14.705	16.352	17.858	9.208	8.219	20.071	26.49	13.498	7.78	10.153	13.49	0.55165
ENSG00000186732	MPPED1	0.035	0.1	4.669	0	0	0.017	0.15	0.214	0	0.005	0.005	0	0.019	0	0.005	0	0.045	0.001	0.154	0	0.551413
ENSG00000196565	HBG2	0.053	0.066	902.153	0.006	0.009	0.649	123.812	351.455	0.159	0.006	0.399	0.011	0.142	0.313	0.183	0.029	0.052	0.049	0.302	0.048	0.55131
ENSG00000139352	ASCL1	0.078	1.461	163.715	0	0	0	3.877	4.287	0.006	0	0	0	0.032	0.002	0	0.396	0.006	0	0.601	0.382	0.551269
ENSG00000185985	SLITRK2	0.162	0.047	9.759	0.208	0.089	0.001	2.167	0.835	0	1.085	0	0	0.008	0.263	0.002	0.11	0.213	0.101	0.049	0.619	0.551178
ENSG00000106268	NUDT1	15.577	18.406	18.345	13.387	17.427	10.922	4.187	4.899	5.995	30.963	4.935	9.363	1.595	6.666	5.887	0.783	6.99	4.366	10.389	2.528	0.551088
ENSG00000149503	INCENP	22.348	26.913	17.398	15.462	30.41	4.01	8.548	8.236	6.602	28.556	6.251	16.538	2.517	5.405	9.719	2.389	10.755	3.383	6.823	7.348	0.551041
ENSG00000056097	ZFR	27.916	41.795	46.161	42.698	16.203	37.431	30.25	31.295	32.212	9.727	28.548	32.052	45.314	32.251	28.114	28.538	21.126	24.867	20.249	14.692	0.550927
ENSG00000187957	DNER	9.447	2.776	88.356	0.469	0.296	0	0.543	4.089	5.386	1.591	0.076	3.875	1.948	0.496	0.027	6.78	0.86	0.458	4.019	0.96	0.550757
ENSG00000161610	HCRT	0.188	0.002	1.68	0	0.009	0.011	0.015	0.083	0	0.044	0	0	0.027	0	0	0.141	0	0.009	0	0.027	0.550738
ENSG00000166676	FAM18A	0.914	0.558	5.034	0.273	0	4.322	1.943	2.906	0	0.054	3.207	0.001	0.139	0	0	0.066	0.225	0.166	0.363	0.292	0.550716
ENSG00000161860	SYCE2	0.719	1.022	1.525	0.468	1.123	2.461	1.061	1.323	0.045	0.612	2.35	0.312	0.625	0.235	0.198	0.339	0.259	0.078	0.232	0.173	0.550651
ENSG00000122733	KIAA1045	0.136	0.193	4.017	0.017	0.004	0.055	0.121	1.029	0.028	0.22	0.045	0.036	0.481	0.003	0	0.097	0.078	0.077	0.074	0.097	0.550641
ENSG00000105428	ZNRF4	0.002	0	0.246	0	0	0	0	0.013	0	0	0	0	0	0	0	0	0	0	0	0	0.550593
ENSG00000130475	FCHO1	14.566	7.477	22.179	2.086	1.394	17.715	0.845	1.18	0.133	7.607	26.381	0.23	2.01	0.02	0.407	0.671	0.835	0.3	0.826	1.693	0.550557
ENSG00000203668	CHML	38.653	21.565	7.923	7.651	2.033	20.229	11.272	10.39	4.767	2.171	2.821	4.278	4.674	9.593	1.735	1.629	2.774	4.466	1.645	1.372	0.550441
ENSG00000197128	ZNF772	3.211	3.247	7.213	3.997	1.323	4.799	5.797	5.459	3.07	1.944	0.546	1.496	0.538	3.122	1.454	4.201	1.308	3.626	0.671	1.577	0.550408
ENSG00000144119	C1QL2	0.342	0.399	21.983	0	0	0	0	0.111	0.001	0	0	0	0.69	0	0	0.008	0.02	0.035	0.063	0.232	0.55038
ENSG00000008300	CELSR3	9.602	6.531	29.371	0.911	0.456	0.391	0.824	1.333	0.218	0.4	1.495	0.283	0.772	0.162	0.194	8.507	0.331	0.08	0.531	5.319	0.550272
ENSG00000121481	RNF2	15.127	23.796	9.597	7.701	4.606	14.435	10.2	9.746	8.233	4.443	6.251	9.347	8.398	11.379	5.356	9.757	4.268	3.717	7.904	3.595	0.550206
ENSG00000101958	GLRA2	0.02	0.095	15.96	0.003	0	0.011	0.068	0.57	0.004	0	0.009	0	0	0	0	0.03	0.002	0	0	0.007	0.550135
ENSG00000054118	THRAP3	86.095	95.949	37.751	50.303	53.763	49.806	57.206	56.678	53.209	19.289	44.506	46.954	38.513	64.495	34.916	31.618	33.046	31.832	42.428	31.352	0.550127
ENSG00000119283	TRIM67	0	0.053	3.824	0.005	0.002	0.017	0.147	0.739	0.002	0.017	0.044	0	0.002	0.014	0.002	0.039	0.028	0.002	0.014	0.101	0.54988
ENSG00000155974	GRIP1	2.462	4.282	6.298	0.077	0.04	0.787	0.933	1.308	2.404	0.55	0.761	3.107	3.35	0.016	0.026	1.116	1.649	0.273	0.354	1.285	0.54982
ENSG00000138778	CENPE	26.506	19.587	4.829	6.265	3.503	0.86	3.446	3.405	3.17	0.336	0.479	5.057	0.075	5.205	1.547	0.081	1.667	0.116	0.519	0.075	0.549523
ENSG00000213934	HBG1	0.165	0.038	1128.04	0	0	0.542	157.449	459.173	0.231	0	0.225	0.018	0	0.427	0.372	0	0	0.02	0	0	0.549495
ENSG00000255953	C11orf39	0	0	0.359	0	0	0.003	0.006	0.004	0	0	0	0	0	0	0	0	0	0	0	0	0.549458
ENSG00000167194	C16orf92	0.007	0	1.223	0	0	0.029	0.078	0.417	0	0	0	0	0	0	0	0.018	0	0	0	0.011	0.549427
ENSG00000158296	SLC13A3	3.667	1.895	1.862	1.182	1.478	0.066	1.051	1.437	1.088	0.622	0.068	0.377	1.425	0.442	0.105	1.176	0.36	0.205	0.815	1.022	0.549354
ENSG00000130287	NCAN	2.838	1.256	258.116	0.013	0.007	0	0.028	0.256	0	0.006	0	0.002	0.024	0.002	0.002	0.251	0.015	0	0.06	0.067	0.549344
ENSG00000226490	NA	0.018	0	0.319	0	0	0	0	0	0	0	0	0	0	0	0	0.012	0	0	0	0	0.54934
ENSG00000144355	DLX1	0.035	1.041	171.694	0.029	1.27	0.013	0.206	1.274	0.548	0.125	0	0.302	0.01	0.104	0.029	0.02	0.057	0.047	0	0.143	0.549133
ENSG00000163104	SMARCAD1	23.436	41.05	14.559	9.08	4.291	21.175	14.758	15.359	14.548	3.229	6.119	8.706	8.61	14.925	10.819	11.318	8.057	4.595	7.272	6.172	0.549002
ENSG00000149557	FEZ1	3.783	18.064	97.163	6.715	8.231	0.029	0.688	2.152	37.717	19.033	1.744	29.994	4.847	15.68	7.128	1.166	4.87	3.866	5.577	1.005	0.548974
ENSG00000174521	TTC9B	0.205	0.237	72.23	0.017	0.006	0.231	0.089	1.765	0	0.163	0.508	0	0.011	0	0	0.034	0.032	0.01	0	0.126	0.548969
ENSG00000163630	SYNPR	0.322	0.089	20.42	0	0	0	0.33	0.301	0	0.336	0	0	0	0	0	0.093	0.012	0.03	0.275	0.014	0.548937
ENSG00000168014	C2CD3	3.573	5.49	10.592	4.765	5.143	7.384	2.833	3.212	2.587	3.283	7.87	3.344	5.681	2.08	3.662	5.31	2.91	3.251	2.618	4.35	0.548724
ENSG00000106689	LHX2	0.137	0.533	65.398	0.035	0.13	0	0.029	0.039	0.012	0.523	0	0.016	0.005	0.009	0.02	0	0.005	0.057	0.049	0	0.548703
ENSG00000104147	OIP5	32.851	33.526	7.916	6.171	7.829	5.417	4.607	4.338	5.163	9.009	0.845	10.888	0.321	3.744	10.16	0.208	2.207	0.285	4.242	0.36	0.548517
ENSG00000258974	NA	6.469	16.472	16.629	4.32	2.756	21.161	7.376	8.016	9.988	6.812	17.743	6.075	6.58	5.028	4.095	10.558	2.079	2.983	5.151	1.083	0.548506
ENSG00000231213	PLSCR5	0	0.109	0.04	0	0	0.005	0.012	0.035	0.007	0	0	0	0	0	0	0	0	0	0	0	0.54838
ENSG00000172995	ARPP21	0.005	0.015	12.216	0.007	0.027	0.112	0.11	0.365	0	1.591	0.004	0	0	0	0.001	0.01	0.008	0.009	0	0	0.548243
ENSG00000145604	SKP2	37.288	47.888	11.293	6.108	13.114	10.361	46.127	32.854	17.078	8.178	3.226	15.362	1.864	13.47	5.912	3.568	5.22	1.303	3.329	2.519	0.548219
ENSG00000130656	HBZ	0.179	0.102	10.587	0	0	0	0.441	2.19	0.013	0	0	0.01	0.121	0.02	0.036	0.021	0.203	0.061	0.257	0.07	0.548219
ENSG00000101938	CHRDL1	9.831	6.319	44.857	0.276	0.037	7.798	0.699	3.386	0	0.11	0.033	0.035	0.247	2.915	0	1.284	10.296	0.788	3.972	3.272	0.548139
ENSG00000125871	C20orf72	28.944	33.652	11.552	14.077	11.006	22.168	22.543	18.549	21.775	10.183	5.469	21.939	22.53	8.539	7.125	4.442	11.344	6.806	8.785	8.509	0.548123
ENSG00000077279	DCX	1.426	2.208	342.859	0	0	0.003	0.226	3.309	0	0.021	0	0.001	0.011	0.001	0	1.32	0.017	0.002	0.07	0.088	0.548092
ENSG00000115844	DLX2	0.046	0.95	302.709	0.148	2.776	0.076	0.105	0.62	0.229	0.051	0.015	0.147	1.114	0.008	0.002	0.054	0.034	0.011	0	0	0.548032
ENSG00000159905	ZNF221	2.817	1.969	3.729	1.478	0.748	3.042	2.041	2.038	1.082	0.193	0.307	0.622	0.597	1.442	0.479	1.889	1.248	2.048	0.391	1.22	0.547903
ENSG00000015592	STMN4	0.013	0.316	114.588	0	0	0	0.31	3.851	0	0	0	0	0.063	0	0	0.007	0.319	0.003	0	0.08	0.547763
ENSG00000175643	RMI2	45.168	50.724	12.648	8.994	8.52	7.126	7.982	6.493	3.205	22.532	0.411	11.748	0.014	5.014	3.362	0.246	6.05	0.359	8.961	0.866	0.547729
ENSG00000188191	PRKAR1B	6.872	14.629	20.845	5.074	6.117	4.009	10.617	11.433	3.959	7.689	3.012	12.594	4.579	2.744	7.761	5.446	7.15	4.291	7.33	5.985	0.547728
ENSG00000100167	44077	14.316	20.409	374.115	0.103	0.03	0.066	0.286	2.541	0.039	1.474	0.238	0.584	0.595	0.098	0.061	33.811	0.207	0.027	1.225	1.734	0.547663
ENSG00000101438	SLC32A1	0.309	0.122	60.081	0	0	0.168	0.129	0.016	0	0	0.052	0	0.007	0	0.021	0.037	0	0	0	0	0.547621
ENSG00000170049	KCNAB3	1.682	1.418	17.33	1.822	2.215	1.379	1.414	1.905	1.077	0.931	3.592	0.309	1.823	0.489	0.984	0.559	1.238	0.188	0.474	4.941	0.547582
ENSG00000184221	OLIG1	0.237	0.372	49.177	0	0	0	0.006	0.012	0	0	3.164	0	0.004	0	0	0.296	0	0.028	0	0.092	0.54743
ENSG00000217236	SP9	0.047	0.663	104.797	0.036	0.04	0	0.005	0.007	0	0	0	0	0.022	0	0	0.003	0.023	0	0	0	0.547413
ENSG00000169375	SIN3A	21.983	34.211	18.843	18.758	19.983	23.921	16.43	14.947	11.864	9.318	31.281	15.744	25.997	15.152	14.637	15.867	13.527	9.709	11.973	7.948	0.547198
ENSG00000111665	CDCA3	12.652	14.128	20.596	14.949	17.697	0.732	6.122	5.89	3.498	23.713	0.275	18.105	0.123	8.369	14.99	0.283	2.639	0.188	3.681	0.522	0.54707
ENSG00000166329	NA	0	0	0.058	0	0	0.019	0	0.011	0	0	0	0	0	0	0	0	0	0.007	0	0	0.546958
ENSG00000101052	IFT52	9.938	21.133	26.283	14.76	8.28	28.101	15.447	18.382	11.177	8.788	7.056	11.191	11.386	18.867	15.278	13.016	8.115	3.19	15.999	7.763	0.54691
ENSG00000176165	FOXG1	0.206	0.167	411.541	0.419	3.441	0	0.006	0.002	0	0	0	0	0	0.009	0	0.003	0.165	0	0	0.027	0.546902
ENSG00000187741	FANCA	12.315	12.88	10.961	12.287	26.27	13.421	8.932	8.719	3.296	13.322	18.144	14.39	0.355	4.64	14.338	0.315	4.749	0.772	1.742	2.293	0.54667
ENSG00000196361	ELAVL3	0.995	1.214	321.461	0.013	0	0.004	0.194	2.388	0.001	0	0.025	0.006	0.239	0	0.002	1.019	0.097	0.07	0.069	0.116	0.546644
ENSG00000133026	MYH10	68.777	101.459	39.919	14.7	13.051	18.624	26.892	38.896	14.391	13.475	3.351	27.261	4.603	38.966	41.092	17.018	7.446	14.124	3.402	6.423	0.546547
ENSG00000015479	MATR3	50.072	76.566	51.991	15.656	9.168	73.577	33.277	38.537	21.125	5.036	37.347	14.031	31.656	27.614	10.232	28.486	20.005	21.035	27.109	18.476	0.546511
ENSG00000075131	TIPIN	16.536	23.012	6.231	6.672	9.074	9.934	4.433	4.449	6.432	5.905	2.749	8.635	4.612	9.723	2.899	4.723	6.128	2.976	4.371	2.888	0.546495
ENSG00000145362	ANK2	3.443	4.807	38.796	3.656	0.451	0.01	6.344	12.044	0.054	1.188	0.007	0.241	0.292	1.76	0.003	1.342	1.076	10.13	1.196	0.537	0.546492
ENSG00000198750	GATSL2	4.69	7.909	19.186	0.849	1.926	1.653	1.231	1.509	0.585	3.815	2.3	0.916	3.312	1.927	3.033	6.702	0.57	2.2	0.395	3.797	0.546465
ENSG00000149262	INTS4	4.811	6.937	8.807	6.173	5.204	9.222	5.321	5.451	5.229	2.841	9.288	4.447	3.848	4.61	6.966	4.142	3.621	2.897	4.325	5.915	0.546339
ENSG00000133119	RFC3	30.552	35.337	9.121	8.158	11.613	9.581	7.94	8.624	11.557	9.819	3.444	20.229	2.829	13.789	5.211	4.499	3.781	4.093	5.083	2.084	0.546335
ENSG00000187792	ZNF70	1.717	2.342	6.153	4.662	4.544	6.93	3.108	3.122	0.731	2.792	2.126	1.294	0.752	1.104	2.332	2.495	1.749	2.262	1.196	2.867	0.546259
ENSG00000155893	ACPL2	5.999	4.523	33.264	1.161	1.277	0.934	5.248	5.185	0.918	1.141	3.345	1.146	1.968	1.875	0.354	2.139	1.41	8.038	1.818	3.016	0.54614
ENSG00000146463	ZMYM4	25.229	31.097	20.156	19.757	6.96	31.782	15.553	17.325	15.844	4.356	12.001	14.163	10.803	28.171	11.555	13.638	8.877	7.829	11.925	10.493	0.546114
ENSG00000105088	OLFM2	76.093	35.973	156.48	1.276	3.435	0.025	1.95	8.434	8.388	1.151	0.935	0.565	8.928	2.914	1.782	55.885	5.298	2.01	2.353	17.147	0.546004
ENSG00000163046	ANKRD30BL	0	0.025	0.302	0	0	0	0.008	0.017	0	0	0	0	0.003	0	0	0	0.006	0	0	0.032	0.545852
ENSG00000213760	ATP6V1G2	1.559	1.384	26.939	1.472	0.929	3.217	2.417	5.51	0.479	1.343	2	0.564	0.729	5.778	0.503	2.41	1.189	0.972	1.238	1.65	0.545852
ENSG00000136297	MMD2	0.072	0.031	12.662	0	0	0	0.009	0.148	0	0	0	0	0.004	0	0	0.029	0.003	0	0.069	0.02	0.545824
ENSG00000167614	TTYH1	8.662	8.453	120.258	0.015	0	0.258	1.805	1.399	0.006	0.003	0.506	0.002	0.084	0.001	0.002	4.011	0.714	0.23	0.09	14.703	0.545766
ENSG00000125462	C1orf61	0.546	0.192	126.072	0.003	0.002	0.01	0.01	0.087	0.002	0	0.11	0.002	2.194	0	0	0.006	0.011	0	0.031	0.02	0.545759
ENSG00000187730	GABRD	1.152	0.784	4.057	0.012	0	0.086	0.176	0.184	0	0	0	0	0.005	0	0	0.151	0.799	0.417	0.405	0.206	0.545723
ENSG00000118432	CNR1	0.256	0.935	17.028	0.878	0.168	0.013	0.295	5.618	0.001	0.005	0.119	0	0.576	0.001	0.008	0.475	0.934	0.239	0.115	0.696	0.545673
ENSG00000198963	RORB	2.571	1.366	11.623	0.071	0.049	0	0.026	0.132	0	0.041	0.117	0.06	0.066	0.186	0.006	2.383	0.052	0.809	0.268	0.131	0.545618
ENSG00000172167	MTBP	1.972	2.753	0.987	1.304	0.898	4.255	1.746	1.697	0.992	0.39	1.698	1.136	0.431	0.826	0.52	0.392	0.577	0.243	0.695	0.431	0.545609
ENSG00000116062	MSH6	56.327	87.378	19.23	9.956	16.967	35.74	19.462	20.324	14.295	9.259	12.204	19.869	24.4	19.396	9.217	12.804	10.136	9.668	10.047	7.94	0.545523
ENSG00000143355	LHX9	0.005	0.044	0.087	0.002	0	0	0.01	0.004	0.001	0.005	0	0.002	0.002	0.002	0	0.017	0	0.021	0	0.011	0.545506
ENSG00000198797	FAM5B	0.314	0.158	8.474	0.027	0.133	0	0.024	0.065	0.02	0.002	0	0.064	0.068	0.08	0.006	0.336	0.04	0.119	0.03	0.109	0.545455
ENSG00000184661	CDCA2	21.232	26.316	5.6	8.727	7.832	0.677	3.827	3.414	6.118	3.091	0.187	11.989	0.215	8.932	4.707	0.085	0.953	2.764	1.551	0.081	0.545333
ENSG00000006377	DLX6	0.008	0.045	24.898	0	0	0.005	0.002	0.008	0.012	0	0	0	0.023	0.002	0	0	0.026	0.007	0	0	0.54533
ENSG00000180613	GSX2	0.009	0.08	32.834	0.078	0.011	0	0	0	0	0	0	0.008	0.594	0.034	0.006	0.008	0	0.017	0	0	0.545309
ENSG00000183248	NA	19.699	13.644	211.19	0.036	0.038	0.256	0.369	1.549	0.025	0.154	0.151	0.011	0.974	0.005	0.02	28.398	0.156	0.021	0.868	5.301	0.545306
ENSG00000172137	CALB2	2.007	4.681	69.946	0.027	0.126	0	0.014	0.763	0.633	0	0	1.935	0.725	0.368	0	0.242	4.068	0.529	0.796	2.457	0.545294
ENSG00000080298	RFX3	2.262	4.082	11.478	0.938	0.252	10.127	4.472	5.229	0.647	0.4	4.515	0.603	1.982	0.882	1.457	4.296	1.021	0.574	1.099	1.798	0.545169
ENSG00000184517	ZFP1	3.866	7.433	16.201	2.915	1.921	7.146	4.73	4.288	5.052	1.45	4.062	4.506	4.745	5.589	2.25	6.136	4.368	3.108	4.974	2.502	0.54501
ENSG00000145919	BOD1	73.835	88.463	50.094	44.897	26.218	11.69	34.17	33.457	24.331	17.695	7.666	25.849	48.935	30.188	31.488	26.036	18.841	23.39	33.819	23.043	0.544994
ENSG00000182447	OTOL1	0.002	0	0.39	0	0	0	0	0	0	0	0	0	0.01	0	0	0	0	0	0	0	0.544991
ENSG00000169006	NTSR2	0.146	0.039	5.177	0	0	0	0.005	0.006	0	0.048	0	0	0.118	0	0	0.051	0.001	0.036	0	0.1	0.544983
ENSG00000178522	AMBN	0.003	0	48.244	0	0	0.021	0.002	0.017	0	0.025	0	0	0	0	0	0.016	0	0	0	0	0.544896
ENSG00000065328	MCM10	16.895	18.492	4.28	2.095	8.253	2.39	1.977	1.96	2.934	1.654	0.162	10.362	0.174	4.241	2.184	0.033	0.772	0.096	1.303	0.048	0.544869
ENSG00000151500	THYN1	34.261	35.987	39.949	19.018	8.426	28.254	18.041	16.828	15.851	9.132	10.189	16.767	3.162	17.46	13.205	19.463	15.231	18.319	23.641	17.79	0.544846
ENSG00000168787	OR12D2	0	0	0.014	0	0	0	0	0	0	0	0	0	0	0	0	0	0	0	0	0	0.544846
ENSG00000186795	KCNK18	0	0	0.049	0	0	0	0	0	0	0	0	0	0	0	0	0	0	0	0	0	0.544846
ENSG00000249861	LGALS16	0	0	0.047	0	0	0	0	0	0	0	0	0	0	0	0	0	0	0	0	0	0.544846
ENSG00000256642	LINC00273	0	0	0.029	0	0	0	0	0	0	0	0	0	0	0	0	0	0	0	0	0	0.544846
ENSG00000170279	C7orf33	0	0	0.031	0	0	0	0	0	0	0	0	0	0	0	0	0	0	0	0	0	0.544846
ENSG00000183035	CYLC1	0	0	0.026	0	0	0	0	0	0	0	0	0	0	0	0	0	0	0	0	0	0.544846
ENSG00000134376	CRB1	0.013	0.06	14.36	0.005	0.006	0.026	0.011	0.044	0.012	0.007	0.033	0.001	0.003	0.013	0.003	0.091	0.016	0.014	0.015	0.013	0.544821
ENSG00000186960	C14orf23	0.011	0.006	13.744	0.009	0.016	0.002	0.008	0.002	0	0	0	0	0	0	0	0	0.003	0	0.025	0.022	0.54479
ENSG00000187821	HELT	0.049	0	23.573	0	0	0	0	0.007	0	0	0	0	0	0	0	0	0	0	0.059	0	0.544787
ENSG00000223802	CERS1	10.089	6.895	50.468	1.534	1.294	0.026	0.466	1.416	0.056	26.907	0.079	0.278	0.448	0.287	3.72	4.462	0.536	0.17	0.454	1.913	0.544779
ENSG00000135298	BAI3	0.714	0.339	12.395	0.562	0.369	0.101	1.086	3.606	0.001	0.104	0.146	0	0.03	0.003	0	0.464	1.44	0.466	0.265	0.046	0.544652
ENSG00000176884	GRIN1	0.942	0.09	12.648	0.015	0.014	0.035	0.406	0.709	0.019	0.011	0.037	0.009	0.143	0.008	0.003	0.471	0.062	0.019	0.335	0.589	0.544629
ENSG00000026559	KCNG1	4.831	8.404	13.474	21.56	4.438	0.077	8.478	7.934	1.47	1.481	0.157	10.646	3.546	0.473	0.131	1.793	6.712	0.254	0.121	2.458	0.544594
ENSG00000105613	MAST1	6.425	4.055	95.866	0.052	0.063	0.974	0.265	1.982	0.033	1.268	0.153	0.104	0.06	0.021	0.088	7.579	0.289	0.06	0.613	4.543	0.544556
ENSG00000112333	NR2E1	0	0	44.815	0	0	0	0.011	0.004	0.007	0.01	0	0	0.01	0	0	0.013	0.032	0	0	0.021	0.544513
ENSG00000105880	DLX5	0.015	0.519	295.683	0	0	0	0.018	0.251	0.795	0	0	0.042	0.207	0.015	0	0.017	1.387	0.038	0	0.042	0.544461
ENSG00000164611	PTTG1	96.753	61.312	56.277	34.419	36.404	7.359	7.292	7.485	26.971	76.188	2.977	58.931	13.34	29.575	27.702	1.186	23.332	1.429	9.647	0.574	0.544372
ENSG00000160352	ZNF714	49.235	22.034	12.88	3.397	3.177	10.792	7.959	8.161	4.9	1.458	3.976	3.251	1.734	3.233	1.493	3.83	3.171	0.98	0.939	1.564	0.544349
ENSG00000153107	ANAPC1	12.086	13.615	3.312	6.276	3.389	9.547	4.526	4.327	9.592	2.692	4.375	8.635	3.777	5.318	5.495	2.574	2.248	1.88	1.352	1.769	0.544283
ENSG00000088882	CPXM1	40.373	77.542	43.567	0.584	0.28	93.871	9.551	19.392	0	0.032	0.518	0	2.035	5.131	21.822	1.914	10.261	2.507	0.783	5.92	0.544263
ENSG00000162039	C16orf73	1.24	0.449	0.149	0.573	0.074	0.39	0.54	0.569	0.004	0.142	0.061	0.006	0.051	0.011	0.025	0.059	0.041	0.013	0	0	0.544172
ENSG00000181656	GPR88	0.009	0.018	9.618	0.013	0.003	0.079	0.094	0.228	0	0	0.078	0	0.012	0.023	0.066	0	0.076	0.057	0.037	0.038	0.54416
ENSG00000105270	CLIP3	7.351	13.692	534.223	33.23	45.185	18.442	4.402	13.11	0.514	30.782	0.628	0.174	33.004	11.078	6.017	50.172	30.959	1.21	6.57	5.355	0.544038
ENSG00000179796	LRRC3B	0.877	0.68	26.412	0	0	0	0.194	0.972	0	0	0	0	3.17	0	0	0.022	0.99	0.029	0.381	0.016	0.543998
ENSG00000139155	SLCO1C1	0.06	0.085	8.293	0	0	0.015	0.688	0.603	0	0.01	0	0	0.016	0.001	0.046	0.088	0.054	0.2	0.165	0.158	0.543957
ENSG00000091651	ORC6	37.423	45.595	11.213	13.501	17.194	4.183	10.591	10.39	13.369	7.443	0.927	29.442	2.419	9.957	11.824	0.294	5.927	2.086	5.347	0.709	0.54394
ENSG00000126500	FLRT1	0.633	0.489	28.299	0.373	0	0.222	0.668	1.452	0	0.114	0.046	0.02	0.013	0.012	0	1.185	0.314	0.328	0.212	0.626	0.543892
ENSG00000143493	INTS7	7.918	14.118	14.246	11.709	5.206	15.446	8.179	8.221	12.784	7.421	3.458	16.072	5.918	12.575	6.647	8.092	4.294	5.715	5.438	4.645	0.54382
ENSG00000100207	TCF20	20.052	22.665	18.221	13.297	12.236	12.514	18.288	17.591	21.882	5.264	22.033	21.978	14.141	8.084	8.6	8.911	14.033	5.946	8.527	12.396	0.543813
ENSG00000076003	MCM6	54.986	89.071	16.146	12.734	24.809	34.921	32.671	31.058	18.463	18.733	13.633	46.066	1.184	35.115	17.357	1.702	8.509	2.316	14.145	2.459	0.543621
ENSG00000185158	LRRC37B	4.618	6.82	28.34	4.744	1.689	19.82	5.723	5.978	2.529	1.21	18.675	2.403	4.413	3.215	4.427	5.059	4.41	1.167	3.26	4.272	0.543577
ENSG00000163568	AIM2	0.82	0.861	2.324	0.046	0.021	0.12	0.252	0.385	0.131	0	1.57	0.058	0.018	0	0.008	0.016	0.77	0.076	0.193	0.159	0.543574
ENSG00000150625	GPM6A	1.905	2.235	165.25	0	0	0.027	0.31	1.958	0.001	0.002	0.045	0	0.008	0	0.023	5.644	0.522	0.017	0.037	0.366	0.543566
ENSG00000170027	YWHAG	114.892	161.092	175.073	64.347	65.139	98.354	55.582	64.86	111.033	76.195	15.586	81.058	72.047	69.087	54.918	38.617	64.063	150.257	71.369	28.257	0.543536
ENSG00000108424	KPNB1	219.49	223.253	61.595	149.515	113.113	102.703	55.789	57.2	99.605	35.72	54.742	104.714	74.21	121.16	51.946	47.332	51.099	80.276	52.504	30.879	0.543312
ENSG00000173114	LRRN3	0.23	6.854	22.921	0.529	0.267	0.334	1.196	4.198	0.001	0.122	1.73	0.011	0.228	2.901	0.006	6.123	0.717	1.295	0	0.484	0.543293
ENSG00000185046	ANKS1B	0.543	0.558	15.734	0.026	0.006	0.722	0.798	0.98	0.003	0.024	0.593	0.001	0.117	0.012	0.012	1.379	0.601	0.088	0.273	0.212	0.543194
ENSG00000183850	ZNF730	12.78	10.738	2.63	0.313	0.583	1.617	1.095	0.867	0.037	0.137	0.007	0.023	0.009	0.541	0.174	0.105	0.187	0.031	0	0.031	0.543194
ENSG00000130816	DNMT1	58.383	65.196	29.12	68.886	117.007	31.406	15.188	17.216	16.24	16.708	32.262	33.624	21.469	23.839	26.501	9.847	16.395	11.26	15.543	13.034	0.543193
ENSG00000006116	CACNG3	0.02	0	4.596	0	0	0.003	0.014	0.009	0	0.008	0	0	0	0	0	0.034	0	0	0	0.034	0.5429
ENSG00000120088	CRHR1	5.504	2.737	5.428	0.605	0.366	3.417	1.065	1.236	2.401	0.705	1.23	1.31	0.989	1.149	3.901	1.584	1.65	0.78	0.409	0.674	0.542893
ENSG00000163125	RPRD2	11.413	13.668	29.668	19.448	16.477	18.121	17.407	15.156	6.315	13.43	17.26	8.276	13.952	7.715	8.121	25.918	11.029	6.063	6.31	7.882	0.542759
ENSG00000121152	NCAPH	25.126	33.726	9.799	12.256	19.935	1.782	4.159	4.092	8.263	12.15	1.535	22.236	0.124	11.264	13.345	0.178	1.731	0.236	3.203	0.304	0.542614
ENSG00000185008	ROBO2	1.213	1.132	29.519	4.246	1.126	0.001	4.028	1.921	0.1	0.069	0	0	0.004	0.266	0.003	7.086	0.536	0.009	0.157	0.375	0.542467
ENSG00000164610	RP9	7.819	6.249	25.767	23.568	8.222	10.566	6.911	6.376	7.932	6.406	8.986	8.179	11.868	9.586	7.341	7.61	4.08	9.07	8.619	7.29	0.542435
ENSG00000030066	NUP160	20.958	36.418	15.397	8.516	5.012	18.199	15.009	15.496	11.136	5.797	10.198	11.322	23.836	12.143	8.469	7.97	8.193	6.292	7.113	7.143	0.542392
ENSG00000131508	UBE2D2	39.531	67.366	45.999	30.627	39.395	39.671	25.212	26.492	17.196	29.628	32.972	13.364	30.866	13.264	13.831	32.492	24.34	33.976	39.984	18.48	0.542045
ENSG00000104738	MCM4	70.003	104.801	30.073	15.054	65.297	26.566	21.555	19.648	28.215	31.975	3.402	68.224	7.839	30.123	32.826	2.878	13.615	7.463	11.958	3.755	0.541875
ENSG00000147044	CASK	13.185	12.068	18.184	5.515	3.741	1.81	20.659	19.361	8.495	1.757	5.746	7.848	7.524	8.931	3.106	6.439	3.825	2.527	6.557	2.725	0.541702
ENSG00000118961	C2orf43	9.875	15.772	6.88	8.622	3.109	11.831	12.752	11.217	8.819	4.445	4.066	5.665	1.507	8.585	5.743	4.814	4.587	3.085	6.807	3.422	0.541695
ENSG00000250361	GYPB	0	0.161	0.403	0.003	0.009	0.236	0.089	0.475	0.003	0	0.041	0	0	0.006	0.006	0	0	0	0	0.016	0.541642
ENSG00000189367	KIAA0408	5.821	4.314	51.785	0.537	0.252	0.024	0.973	4.983	0.027	0.161	0.781	0.002	0.33	1.515	0	7.445	3.136	0.221	1.423	1.168	0.541628
ENSG00000146247	PHIP	19.271	20.956	18.865	7.283	5.117	32.887	12.349	11.906	4.142	2.077	24.297	3.962	11.107	5.133	2.853	12.018	5.11	3.831	3.114	6.507	0.54156
ENSG00000203817	FAM72C	4.755	5.45	1.128	1.359	0.855	0.45	0.674	0.83	1.12	0.587	0.371	0.949	0.046	0.732	0.526	0.167	1.183	0.069	0.631	0.104	0.541553
ENSG00000115827	DCAF17	7.44	6.309	5.871	5.482	2.169	11.427	6.261	7.028	7.499	1.689	4.069	3.585	2.917	4.282	2.497	4.507	3.037	1.889	3.885	2.28	0.541339
ENSG00000130283	GDF1	10.681	8.516	65.802	1.901	1.685	0.016	0.383	1.365	0.066	35.493	0.061	0.289	0.557	0.311	4.402	5.307	0.516	0.151	0.379	1.26	0.54125
ENSG00000103647	CORO2B	1.826	4.841	160.425	56.379	37.846	0.309	1.251	3.124	0.187	59.824	0.538	2.414	2.002	29.988	2.431	26.556	2.226	4.717	5.089	2.371	0.541201
ENSG00000157087	ATP2B2	0.149	0.12	8.058	0.03	0.011	0.042	0.187	0.554	0	0	0.032	0	0	0	0	0.349	0.11	0.021	0	0.251	0.541151
ENSG00000170091	NA	0.143	0.292	166.714	0	0	0	0.629	9.203	0.008	0.003	0	0.004	0.017	0	0.003	2.885	0.509	0.222	0.692	1.321	0.541115
ENSG00000182175	RGMA	10.76	18.802	72.945	0.569	1.278	2.001	0.764	4.556	0.111	0.76	0.447	0.074	1.116	0.18	0.015	3.79	14.293	4.34	7.027	6.616	0.540791
ENSG00000064309	CDON	6.48	6.193	7.313	0.384	0.233	0.007	2.748	7.254	0.48	2.856	0.206	0.421	0.341	1.936	0.726	2.632	1.857	1.101	0.305	1.199	0.540578
ENSG00000048649	RSF1	11.859	10.973	13.175	3.728	2.033	7.567	6.969	7.604	4.039	1.07	8.485	1.996	9.228	3.701	1.941	8.755	4.368	4.28	4.348	3.707	0.540542
ENSG00000162062	C16orf59	22.687	25.521	5.728	8.59	18.627	2.003	1.977	2.398	1.53	17.001	0.153	4.805	0.2	1.093	6.517	0.347	2.371	1.432	1.692	1.019	0.54045
ENSG00000112273	HDGFL1	0.003	0	0.551	0	0	0.015	0.002	0.004	0	0	0	0	0.043	0	0.002	0	0.013	0	0	0	0.540431
ENSG00000069248	NUP133	21.265	35.284	16.618	11.101	6.091	23.456	18.825	17.99	19.936	5.628	14.347	12.59	11.96	15.4	12.455	12.752	10.362	12.072	8.671	8.565	0.540296
ENSG00000131095	GFAP	0.281	0.166	117.804	0.277	0.204	0.075	0.037	0.043	0.034	0.028	0.037	0.006	0.473	0.049	0.043	0.074	0.198	1.163	0.493	1.075	0.54024
ENSG00000134207	SYT6	16.75	12.199	8.313	0.063	0.002	0	0.032	0.461	0	0.14	0.041	0	0.006	0.004	0.011	3.69	0.027	0.01	0.052	1.398	0.540009
ENSG00000114744	COMMD2	13.826	20.42	13.362	7.757	4.138	19.827	11.907	12.896	13.446	3.986	7.309	8.316	8.472	13.054	6.64	6.396	5.78	7.186	11.739	4.907	0.539999
ENSG00000182218	HHIPL1	0.949	1.363	2.787	0.441	0.336	0.004	0.288	0.529	0.065	0.682	0.043	0.033	0.161	0.844	0.765	0.14	0.744	0.533	0.628	0.3	0.539985
ENSG00000100888	CHD8	25.34	27.922	15.835	15.311	13.313	20.017	13.978	13.805	7.752	8.344	27.45	4.666	15.908	4.808	10.916	15.114	10.688	8.808	7.228	9.818	0.539897
ENSG00000141505	ASGR1	4.409	5.75	16.588	0.403	0.4	2.532	1.369	2.514	0.119	0.101	6.761	0.121	1.041	0.074	7.453	1.438	1.157	0.262	2.208	1.788	0.53988
ENSG00000105419	MEIS3	9.012	18.93	36.456	10.589	19.017	0	0.897	3.698	0.844	18.331	0.083	0.872	3.633	5.023	0.003	16.143	7.406	0.951	6.085	6.511	0.539873
ENSG00000101638	ST8SIA5	4.536	0.458	84.481	0.181	0.74	0.015	0.094	0.594	0.026	0.027	0.048	0.01	0.207	0.076	0.063	3.551	0.04	3.314	0.251	0.368	0.539818
ENSG00000170264	FAM161A	5.87	4.539	5.574	0.953	1.094	3.725	2.532	2.747	0.641	0.536	0.419	0.352	0.267	0.482	0.362	2.634	1.364	1.974	2.6	1.967	0.539774
ENSG00000103460	TOX3	6.722	12.495	304.552	0	0	0	8.338	6.76	0.009	0.711	0.013	0	1.847	0.004	0	18.246	0.522	0.009	14.581	1.902	0.539708
ENSG00000188848	BEND4	13.984	13.616	2.789	0.005	0.002	11.698	1.279	0.845	0	0	0.435	0	0.006	0.02	0.019	0.005	0.024	0.009	0.189	0.003	0.539633
ENSG00000106144	CASP2	8.55	9.1	21.941	8.84	18.449	29.816	10.76	10.403	7.617	11.181	13.432	13.736	6.189	11.659	19.237	4.978	4.524	3.286	3.79	3.761	0.539377
ENSG00000075461	CACNG4	3.572	4.609	222.426	0	0.003	0.02	0.435	3.397	0.022	0.022	0.023	0.266	0.189	0	0.009	8.568	0.212	0.061	4.822	2.12	0.539361
ENSG00000146005	PSD2	0.075	0.174	15.559	0.005	0.004	0.725	0.241	0.678	0	0.011	0.349	0	0.428	0.031	0	0.148	0.048	0.032	0	1.101	0.539331
ENSG00000163159	VPS72	18.928	20.767	33.492	17.323	13.287	11.261	7.987	8.133	11.377	16.977	3.897	10.761	9.683	9.094	23.061	11.273	11.614	10.196	14.412	11.294	0.539304
ENSG00000144278	GALNT13	3.956	2.833	5.433	0.007	0	0.029	2.342	0.891	0.006	0.008	0.011	0.002	0.076	0.003	0.051	3.586	0.23	0.034	0.01	0.231	0.539185
ENSG00000168081	PNOC	0.011	0.014	4.829	0	0	0.318	0.095	0.767	0.005	0	1.428	0	0	0	0	0.057	0.052	0.003	0.152	0	0.538883
ENSG00000177733	HNRNPA0	119.139	177.982	109.352	49.099	60.906	111.674	80.178	84.563	31.943	41.617	74.08	35.657	64.571	27.808	51.743	30.847	73.569	62.244	101.621	51.016	0.538841
ENSG00000102226	USP11	21.061	30.392	135.447	31.027	29.261	24.314	17.908	19.594	3.688	44.071	22.363	8.242	45.915	10.689	11.823	50.878	13.332	13.959	11.858	21.118	0.538678
ENSG00000146360	GPR6	0.352	0.044	5.445	0	0	0	0.005	0.01	0	0	0	0	0	0	0	0.458	0	0	0	0.055	0.538504
ENSG00000196844	PATE2	0.054	0	0.145	0.028	0.013	0	0	0.03	0	0.005	0	0	0.012	0.022	0.01	0.002	0.025	0	0	0.032	0.538422
ENSG00000197322	C17orf102	0.003	0.004	0.163	0	0	0	0.001	0.024	0	0	0	0	0	0	0	0.016	0	0	0	0	0.538355
ENSG00000116584	ARHGEF2	9.43	15.502	56.23	91.567	26.921	47.291	12.008	10.742	7.995	25.227	24.681	17.557	13.911	14.956	16.736	4.197	12.211	8.754	13.94	8.96	0.53812
ENSG00000106341	PPP1R17	1.546	6.009	1.685	0	0	0	0	0.004	0	0	0.528	0	0	0	0	0	0	0	0	0.044	0.538088
ENSG00000148482	SLC39A12	0.001	0	1.334	0	0	0	0.011	0.025	0.062	0.04	0	0	0.022	0	0	0.014	0.02	0.011	0	0.019	0.538025
ENSG00000143442	POGZ	16.389	18.875	44.066	16.132	12.913	23.353	19.749	22.403	9.733	12.489	23.089	8.81	16.92	9.003	20.081	19.532	14.245	6.838	5.395	24.698	0.537982
ENSG00000104435	STMN2	2.606	6.894	1576.11	5.334	0.935	0	4.02	76.118	0	0.006	0	0	0.103	0.615	0	66.57	3.384	0.007	4.974	4.736	0.537955
ENSG00000108953	YWHAE	400.506	532.277	668.173	335.75	346.477	204.083	207.776	203.161	432.44	304.346	42.893	445.403	388.954	583.588	227.935	253.998	148.967	295.535	278.479	118.404	0.537864
ENSG00000011021	CLCN6	18.86	10.739	24.534	20.922	12.136	9.978	8.581	9.158	4.895	7.47	15.042	5.724	12.122	8.269	16.385	9.082	8.274	10.932	3.426	14.03	0.537818
ENSG00000166159	LRTM2	0.017	0.021	1.336	0	0	0.001	0.013	0.055	0	0	0.094	0.003	0.003	0	0.01	0.026	0.01	0	0.06	0.006	0.537814
ENSG00000253133	NA	0.025	0.07	1.299	0.282	0.183	0.767	0.789	0.868	0.023	0.124	0.728	0.066	0.266	0.168	0.108	0.265	0.122	0	0	0.047	0.537493
ENSG00000178999	AURKB	105.863	93.988	52.789	38.376	71.329	2.556	10.83	10.312	9.553	117.131	1.529	39.929	0.033	11.903	33.196	0.143	12.863	0.193	12.323	0.594	0.537327
ENSG00000176749	CDK5R1	4.355	8.558	78.268	0.37	0.825	0.528	0.895	2.425	3.353	18.716	6.044	2.74	1.682	0.404	1.652	8.642	4.413	1.382	0.642	2.487	0.5372
ENSG00000011201	KAL1	64.117	30.748	21.058	1.656	1.172	0.676	0.524	3.408	2.641	0.03	0.032	5.016	0.592	0.041	0.581	0.45	0.5	0.788	0.226	0.132	0.537153
ENSG00000165478	HEPACAM	0.006	0	28.953	0.006	0.014	0.001	0.007	0.012	0.003	0	0.012	0.098	0.089	0.066	0.019	0.035	0.165	0.261	0.033	0.33	0.537129
ENSG00000140262	TCF12	12.668	32.444	49.28	29.489	9.665	28.823	18.86	19.486	14.69	5.083	14.881	12.79	20.584	54.846	15.201	11.173	11.594	7.161	13.396	5.881	0.537086
ENSG00000163539	CLASP2	4.637	8.097	36.704	3.414	1.642	7.258	6.897	11.221	9.494	2.572	9.16	5.813	3.44	5.109	3.287	9.607	4.45	6.166	3.187	5.159	0.537081
ENSG00000136352	NKX2-1	0.003	0.005	1.998	0	0	0	0.005	0	0.002	0.008	0	0	0.003	0.002	0	0	0.013	0.01	0	0.05	0.536906
ENSG00000167414	GNG8	1.047	0.373	18.609	0.107	0.605	0.167	1.527	6.375	0	0	0.338	0	0.22	0.081	0.179	0.053	0.352	0.438	2.061	0.37	0.536872
ENSG00000083817	ZNF416	5.096	6.14	3.097	3.935	1.608	5.378	4.306	3.957	4.769	3.179	2.601	3.301	3.02	3.218	1.519	3.026	3.396	3.171	1.488	1.408	0.536793
ENSG00000114739	ACVR2B	9.152	10.604	3.54	0.663	0.452	0.506	1.446	1.287	0.184	0.983	0.602	0.666	0.338	0.159	0.786	0.654	0.37	0.489	0.586	1.974	0.53678
ENSG00000160551	TAOK1	17.624	27.636	18.596	20.895	10.586	20.972	10.264	11.706	20.007	3.611	19.773	17.687	12.734	29.179	9.152	11.577	7.586	11.685	5.618	4.032	0.536673
ENSG00000189079	ARID2	8.614	13.053	12.942	4.216	2.834	10.782	6.956	7.275	7.294	2.816	16.647	7.362	8.996	5.961	6.237	6.224	4.399	3.182	2.432	4.475	0.536348
ENSG00000136231	IGF2BP3	57.12	40.794	5.759	9.089	9.586	3.667	21.785	19.622	7.072	3.399	0.287	2.716	0.014	4.143	11.285	0.087	1.263	0.09	0.258	0.186	0.536285
ENSG00000100227	POLDIP3	27.08	38.555	61.375	42.262	37.323	48.428	34.078	33.607	30.207	65.292	41.781	30.081	50.311	23.569	26.181	24.139	30.652	26.608	36.412	19.621	0.536259
ENSG00000170390	DCLK2	0.074	1.149	206.301	5.27	2.374	4.721	1.206	4.283	0.03	2.235	0.288	0.016	1.065	2.758	1.593	4.666	2.488	6.403	0.934	3.901	0.536242
ENSG00000170464	DNAJC18	6.112	7.155	21.859	2.851	2.015	6.033	1.345	2.782	1.675	2.269	1.716	2.26	2.663	4.707	10.378	5.281	2.779	3.161	1.629	1.493	0.536226
ENSG00000221870	CXorf1	0.003	0	0.734	0	0	0	0.312	0.123	0	0.024	0	0	0	0.005	0	0.007	0.029	0.01	0	0.043	0.536146
ENSG00000145242	EPHA5	0.073	0.036	19.429	0	0.012	0	0.036	0.336	0	2.066	0	0	0.001	0.645	0.245	0.139	0.14	0.027	0.184	0.021	0.536121
ENSG00000173320	STOX2	5.161	10.049	15.635	0.036	0.009	0.626	0.915	1.486	0.445	3.287	0.079	0.481	1.486	0.515	0.034	3.192	1.781	3.787	0.952	4.055	0.536004
ENSG00000215397	SCRT2	0.578	0.663	53.178	0	0	0	0.005	0.01	0	0	0	0	0.021	0	0	2.858	0.004	0	0	0.367	0.535898
ENSG00000177463	NR2C2	6.08	5.736	11.78	7.429	4.72	10.728	8.221	9.831	2.911	3.758	14.884	4.661	7.169	3.77	5.591	5.214	3.449	3.921	1.901	2.769	0.535828
ENSG00000198551	ZNF627	6.009	13.355	18.496	4.403	1.187	9.614	9.718	9.504	6.658	1.931	4.54	3.972	4.109	6.91	5.6	8.868	5.702	3.082	7.098	5.374	0.535791
ENSG00000160781	PAQR6	5.701	1.71	37.97	0.421	0.241	4.497	3.546	7.172	1.236	0.315	2.723	1.665	1.665	0.07	1.066	1.581	5.612	0.364	1.504	5.271	0.535719
ENSG00000138182	KIF20B	30.141	24.537	3.857	5.163	4.627	5.727	5.462	4.855	4.199	1.205	2.131	5.945	1.076	6.692	1.282	0.859	2.42	0.741	1.459	0.402	0.535569
ENSG00000165617	DACT1	19.724	17.25	16.064	0.993	1.12	2.857	2.532	6.527	0.098	8.139	0.508	0.039	1.274	4.042	0.121	1.032	3.156	0.897	12.145	1.138	0.535538
ENSG00000004777	ARHGAP33	10.843	8.697	186.239	6.889	5.889	14.85	5.031	7.475	0.21	4.322	6.425	0.868	0.601	0.513	4.531	10.569	7.765	1.422	3.972	26.49	0.535519
ENSG00000153982	GDPD1	5.061	2.71	7.722	0.173	0.08	9.751	1.456	1.499	1.277	0.691	0.764	0.379	0.241	0.201	1.178	1.3	0.624	1.278	1.829	0.729	0.535419
ENSG00000169427	KCNK9	0.079	0.052	0.734	0.005	0	0.016	0.022	0.037	0	0.038	0.061	0	0.041	0.001	0.002	0.125	0.006	0.008	0	0.053	0.535326
ENSG00000197959	DNM3	1.086	0.263	3.113	0.103	0.233	2.166	0.245	0.835	0.505	0.279	0.432	0.781	0.578	0.421	0.204	0.748	0.431	0.187	0.308	0.32	0.534995
ENSG00000122550	KLHL7	21.217	32.158	28.893	6.631	4.616	10.49	7.671	8.777	13.685	4.331	4.71	8.624	14.019	11.928	5.934	6.435	6.426	23.84	6.405	4.298	0.534986
ENSG00000146006	LRRTM2	0.005	0.122	28.527	0.073	0.008	0.208	0.802	1.34	0.004	0.02	0.308	0.8	0.31	0.829	0.072	1.456	0.059	0.055	0	0.184	0.534751
ENSG00000166862	CACNG2	0.012	0.019	2.83	0	0	0	0	0.045	0	0	0	0	0	0.001	0	0.094	0.017	0	0.035	0.016	0.534535
ENSG00000183309	ZNF623	5.757	9.337	8.536	10.607	4.818	7.73	9.91	9.763	8.087	4.972	3.678	5.463	3.282	9.486	6.319	5.561	5.885	3.991	4.501	4.978	0.534446
ENSG00000182979	MTA1	44.007	33.685	58.102	31.987	24.2	22.964	16.14	16.82	11.169	23.105	20.061	16.421	17.185	7.754	24.703	17.9	18.157	16.245	13.962	47.394	0.534161
ENSG00000149308	NPAT	8.157	9.561	5.54	3.956	3.97	10.366	7.258	6.416	5.189	3.461	9.829	5.813	6.312	6.557	3.811	5.7	2.926	2.263	2.515	1.782	0.534134
ENSG00000226784	PGAM4	6.258	32.782	15.397	19.131	20.006	3.34	3.655	3.748	21.634	35.176	6.616	12.067	8.864	5.866	3.654	5.221	1.256	1.319	1.616	0.125	0.534113
ENSG00000122970	IFT81	4.05	5.332	7.35	2.026	0.883	6.312	2.616	3.274	2.557	1.629	0.132	1.522	1.803	4.68	0.913	3.66	2.424	2.323	2.364	1.686	0.533981
ENSG00000188021	UBQLN2	21.363	29.586	80.087	29.51	41.448	31.127	25.449	25.433	27.604	34.005	28.481	30.239	53.284	33.832	20.234	49.68	17.39	18.574	13.636	7.469	0.533938
ENSG00000067798	NAV3	0.684	0.518	22.665	13.968	12.442	0	0.61	1.648	6.775	0.109	0.024	4.41	0.452	13.004	2.774	0.67	1.088	1.131	0.211	0.352	0.533586
ENSG00000021645	NRXN3	0.979	1.047	29.91	0.027	0.037	0.102	0.583	3.189	0.318	0.009	0	0.087	0.344	4.691	0.219	0.602	1.57	0.092	0.21	0.503	0.533367
ENSG00000170370	EMX2	0.01	0.27	3.276	1.318	2.432	0.006	0.015	0.009	1.018	0	0	0	0.073	0	0	0.013	1.173	0.07	0.035	0.218	0.533314
ENSG00000177182	CLVS1	0.036	0.049	2.478	0.185	0.001	2.007	1.165	1.316	0.01	0	0.193	0	0.003	0.006	0	0.424	0.034	0.014	0.004	0.034	0.533207
ENSG00000112039	FANCE	8.392	8.994	9.721	17.374	17.253	6.393	7.213	6.695	5.732	11.298	1.826	9.664	5.951	4.266	10.401	1.754	5.86	2.933	5.053	3.559	0.532958
ENSG00000147588	PMP2	0.012	0	22.84	0	0	0	0.019	0.072	0.001	0.007	0	0	0	0	0	0.013	0.298	0.164	0.5	0.102	0.532955
ENSG00000257591	NA	12.357	8.228	6.685	1.791	1.599	3.177	2.794	2.563	1.956	0.233	0.486	1.13	1.685	1.983	0.779	2.739	1.907	1.493	1.732	4.541	0.532808
ENSG00000140382	HMG20A	16.74	19.935	11.78	13.198	6.671	13.485	12.945	13.144	15.286	9.226	9.793	12.258	6.243	14.482	17.895	9.118	5.262	7.192	7.101	5.587	0.532796
ENSG00000139613	SMARCC2	20.237	14.922	64.829	24.088	26.619	42.026	20.148	20.555	11.28	16.943	29.858	15.433	11.646	23.537	21.102	21.67	18.706	11.765	15.131	28.466	0.532249
ENSG00000171885	AQP4	1.373	0.297	59.757	0	0	0	0.253	0.362	0	0.01	0	0	0.019	0	0	1.081	0.027	0.56	2.891	0.325	0.532056
ENSG00000165288	BRWD3	11.476	9.798	8.543	1.739	0.929	10.642	10.018	8.268	5.02	1.502	11.377	2.926	3.592	3.234	2.229	3.352	3.947	2.184	4.105	2.946	0.531917
ENSG00000137075	RNF38	13.353	21.427	76.921	7.975	8.411	30.461	12.177	13.113	7.814	15.925	42.399	6.165	16.087	9.656	20.444	20.618	12.802	9.922	9.536	6.412	0.531884
ENSG00000168539	CHRM1	0.019	0.038	3.62	0.021	0.007	0	0.405	0.812	0.002	0.71	0	0	0.011	0	0.01	0.044	0.155	0.005	0.159	0.105	0.531769
ENSG00000148734	NPFFR1	0.018	0.024	0.136	0.018	0.004	0	0.069	0.117	0	0	0.035	0.039	0.017	0	0	0.025	0	0	0	0	0.531663
ENSG00000198315	ZNF192	9.664	11.97	13.057	8.826	3.017	25.007	10.97	12.272	4.556	4.145	15.255	4.479	9.372	8.25	5.047	8.152	4.184	2.749	2.142	2.386	0.531277
ENSG00000224113	NA	8.014	6.647	3.866	2.648	3.637	5.003	4.914	5.516	4.305	1.897	8.774	3.427	2.528	4.914	3.339	3.245	1.695	1.964	1.03	1.639	0.531043
ENSG00000153930	ANKFN1	0	0.07	5.913	0	0.013	0.075	0.116	0.133	0.087	0.031	0	0.012	0	0.095	0.161	0.023	0.339	0	0.053	0.054	0.530991
ENSG00000130540	SULT4A1	4.667	3.555	6.68	0.461	0.058	0.017	0.277	2.685	0.35	0.018	0.016	0.11	0.169	0.081	0.397	3.63	0.426	0.176	0.158	1.318	0.530916
ENSG00000213160	KLHL23	26.58	29.88	14.704	0.718	0.479	12.064	18.919	18.471	0.721	0.588	0.17	1.546	3.717	1.958	3.232	3.522	7.27	7.82	3.51	2.541	0.530849
ENSG00000172795	DCP2	24.475	22.626	7.957	1.614	1.376	15.149	10.161	9.919	1.609	1.274	12.916	0.899	4.667	1.039	1.552	3.289	3.619	2.922	4.08	3.151	0.53064
ENSG00000255251	NA	0.098	0.039	0.089	0.015	0.044	0.034	0.013	0.021	0.006	0.074	0.057	0.023	0.009	0.025	0	0.025	0	0	0	0.066	0.53037
ENSG00000084693	AGBL5	13.247	17.917	17.061	12.017	9.297	19.673	11.458	11.389	9.959	22.294	8.966	12.985	4.787	7.684	18.873	6.396	8.241	2.974	9.646	7.447	0.530194
ENSG00000135749	PCNXL2	12.084	7.188	6.235	4.373	2.086	4.852	1.16	1.536	4.609	0.9	8.757	3.512	4.205	2.719	1.558	4.606	1.651	0.112	0.872	3.2	0.530052
ENSG00000145309	CABS1	0.015	0.122	0.052	0	0	0	0	0	0	0	0	0	0	0	0	0	0.018	0	0	0	0.530027
ENSG00000142698	C1orf94	5.569	4.354	1.482	0.014	0.035	0	0.012	0.004	0.013	0	0	0	0	0.055	0	0.016	0	0	0	0	0.530024
ENSG00000165821	SALL2	101.956	123.547	34.662	2.401	2.873	6.068	2.725	4.419	0.351	7.025	0.845	1.475	1.317	2.634	1.849	15.043	3.241	0.946	2.188	2.499	0.529844
ENSG00000253506	NACA2	0.011	0.578	17.749	5.332	3.774	20.855	5.846	5.316	2.327	1.679	5.508	0.085	8.139	0.188	0.125	4.455	0	0	0	0	0.529816
ENSG00000162607	USP1	26.809	47.041	17.956	12.408	9.348	39.877	20.968	21.451	6.48	4.373	13.828	10.259	16.891	13.046	5.824	12.392	10.431	9.508	16.472	5.686	0.529782
ENSG00000178665	ZNF713	1.02	1.784	7.713	0.26	0.193	3.017	1.262	1.634	0.296	0.449	0.439	0.353	2.285	0.364	0.759	1.256	0.651	1.011	1.07	1.302	0.529771
ENSG00000183765	CHEK2	15.257	17.144	2.883	4.048	4.06	6.303	6.728	5.873	6.345	3.094	1.791	5.243	1.422	3.849	5.203	0.578	3.931	0.73	3.649	1.963	0.529419
ENSG00000164796	CSMD3	0.006	0.034	3.452	0.032	0.018	0.003	0.146	0.185	1.411	0.025	0	0.57	0	0.003	0.009	0.023	0.016	0.001	0.019	0.06	0.529383
ENSG00000087250	MT3	0.062	0.162	130.566	0.035	0.325	0.032	0.263	0.371	0	0	0	0.011	0	0.028	0.065	0.578	1.542	3.558	1.747	1.065	0.529312
ENSG00000196741	CXorf24	1.764	1.305	10.211	1.504	0.662	3.585	3.111	3.579	0.656	1.152	0.471	0.431	1.291	1.68	1.145	1.849	2.091	1.898	1.423	1.199	0.529252
ENSG00000204060	FOXO6	1.846	1.256	63.808	0.186	0.122	0.254	2.942	4.533	0.012	0.201	0.081	0	4.013	0.007	0.036	4.994	0.874	0.745	0.625	2.264	0.529154
ENSG00000115353	TACR1	0.154	1.016	2.865	0.021	0.004	0.054	0.578	0.58	0	0	0.02	0	0.104	0.086	0	0.051	1.137	0.027	0	0.249	0.529039
ENSG00000177519	RPRM	12.597	21.624	15.646	0	0	0.015	0.075	2.005	0	0.402	0.031	0	1.37	0.031	0.007	0.065	2.481	0	10.896	0.285	0.529019
ENSG00000095002	MSH2	75.2	96.117	14.747	7.664	7.565	36.174	14.241	13.269	7.835	5.03	3.154	13.372	2.373	11.476	5.992	6.698	5.852	6.089	6.188	3.874	0.529012
ENSG00000151834	GABRA2	0.428	0.165	2.227	0.002	0.001	0.004	0.139	0.657	0.007	0	0	0.01	0	0.001	0	0.171	0.068	0.004	0.5	0.022	0.528812
ENSG00000206177	HBM	0.027	0.057	8.96	0	0	0.012	0.627	4.102	0.008	0	0.196	0.008	0.071	0.018	0.006	0	0.13	0.066	0.206	0.029	0.528811
ENSG00000186001	LRCH3	6.638	6.634	9.427	7.932	6.15	7.358	6.392	7.353	6.754	5.274	7.687	5.102	8.095	8.681	10.315	5.174	4.751	4.163	3.827	3.96	0.528732
ENSG00000204624	PTCHD2	2.248	2.647	26.178	0.226	0.205	0.039	0.254	0.398	0.006	0.049	0.168	0.018	0.061	0.008	0.142	5.78	0.017	0.009	0.025	0.96	0.528681
ENSG00000139220	PPFIA2	0.132	0.151	6.622	0.15	0.008	0.006	0.786	0.921	0	0.016	0	0	0.055	0.192	0.003	0.213	0.245	0.035	0.721	0.109	0.528534
ENSG00000101624	CEP76	5.552	8.529	4.596	2.679	2.093	5.489	4.179	3.777	6.279	2.651	2	4.697	3.891	3.735	3.572	3.079	3.163	2.134	3.157	2.15	0.528093
ENSG00000146090	RASGEF1C	0.131	0.442	2.13	0	0	0	0.157	0.527	0	0.526	0.042	0	0.133	0.013	0	0.03	0.354	0.107	0.24	0.122	0.528029
ENSG00000136274	NACAD	2.787	2.667	46.781	4.793	7.005	0.213	1.025	3.606	0.171	5.397	0.249	0.218	8.381	0.463	1.685	6.025	3.292	3.518	1.923	1.821	0.528025
ENSG00000011376	LARS2	24.323	19.225	7.195	9.646	11.544	8.219	9.001	8.798	17.006	11.073	4.357	14.412	4.382	8.393	8.733	5.265	4.891	7	4.11	3.104	0.527978
ENSG00000145794	MEGF10	12.661	5.304	4.234	0.037	0.043	0.086	0.21	0.765	0.001	0.018	0.01	0	0.547	0.007	0.098	0.02	0.039	0.029	0.014	0.008	0.527937
ENSG00000113569	NUP155	33.929	25.279	6.044	10.288	10.213	7.173	7.835	7.613	11.235	6.792	7.611	14.187	6.427	10.765	7.956	4.889	3.334	3.297	3.265	2.247	0.527795
ENSG00000237240	NA	9.322	9.997	14.092	11.142	12.907	1.669	6.588	6.389	2.468	15.906	0.337	13.234	0.066	4.961	13.543	0.163	3.711	0.211	2.8	0.839	0.527789
ENSG00000125531	C20orf195	1.829	0.907	3.776	0.617	0.211	0.329	0.095	0.158	0.521	0.526	0.643	0.479	0.616	0.12	2.119	0.378	0.376	0.064	0.636	0.313	0.527655
ENSG00000177301	KCNA2	0.134	0.436	4.381	0	0	0.001	0.081	0.471	0.014	0.078	0.231	0.004	0.008	0	0	0.723	0.124	0.068	0	0.179	0.527492
ENSG00000066382	MPPED2	0.569	0.555	15.453	0.006	0.003	3.427	0.165	1.21	0.001	3.868	0.158	0	0.223	0.007	0	1.117	0.585	0.929	0.056	1.137	0.527351
ENSG00000180182	MED14	19.128	17.999	17.542	10.836	8.824	14.872	27.714	24.196	10.878	8.112	13.242	11.606	13.431	11.976	13.22	17.394	6.846	4.457	4.095	5.743	0.527058
ENSG00000156787	WDR67	4.643	5.573	2.502	2.198	0.8	9.192	2.05	2.201	1.766	0.63	3.611	1.48	0.239	1.785	0.889	0.884	0.806	1.087	0.889	0.59	0.526964
ENSG00000168280	KIF5C	21.093	19.472	39.595	0.265	0.051	0.071	2.946	7.514	0.012	0.078	2.315	0.012	1.432	0.073	0.008	24.564	0.744	0.158	0.721	1.963	0.526879
ENSG00000133678	C10orf57	19.363	12.277	17.071	12.886	5.951	17.118	22.853	19.465	18.429	8.028	5.143	10.901	2.846	10.987	7.03	8.801	14.354	3.484	7.735	5.577	0.526476
ENSG00000197694	SPTAN1	47.101	34.898	117.649	61.785	45.807	27.348	59.348	54.099	33.079	35.372	47.422	34.223	34.4	71.653	85.701	25.064	33.128	35.395	15.627	30.064	0.526406
ENSG00000100426	ZBED4	16.14	21.639	15.714	10.763	11.813	22.082	9.804	10.411	7.941	15.111	33.211	8.325	9.01	4.191	9.803	5.412	6.311	6.915	6.241	6.646	0.526392
ENSG00000151577	DRD3	0.629	0.133	0.292	0	0	0	0	0	0	0.004	0.02	0	0	0	0	0	0	0	0	0	0.526343
ENSG00000214189	ZNF788	7.729	9.999	2.381	1.446	1.138	2.221	2.791	2.773	0.447	0.416	0.09	0.047	0.677	1.86	0.491	0.415	1.38	1.123	1.734	1.243	0.526213
ENSG00000256229	ZNF486	18.193	10.986	4.873	2.67	2.483	7.333	6.906	5.455	3.945	0.559	1.524	1.334	1.378	3.665	1.77	2.638	1.938	1.361	4.156	2.24	0.525894
ENSG00000124237	C20orf85	0	0	0.106	0	0	0	0.021	0	0	0	0	0	0.012	0	0	0	0	0	0.011	0	0.525784
ENSG00000162706	CADM3	3.467	4.613	120.534	0.062	0.045	0.002	0.441	9.564	0.005	0.924	0.012	0.019	0.269	0	6.113	0.239	10.99	1.744	2.783	1.499	0.525526
ENSG00000066557	LRRC40	26.476	33.311	15.872	7.007	3.794	16.398	13.324	15.739	18.655	2.858	9.274	10.118	9.111	18.362	7.245	7.572	8.855	9.064	9.461	7.124	0.525504
ENSG00000012660	ELOVL5	132.131	73.829	33.409	53.865	41.91	84.728	15.396	16.332	31.479	41.782	48.211	36.238	40.517	41.544	53.31	25.054	17.212	20.275	5.604	5.699	0.525476
ENSG00000148408	CACNA1B	2.56	0.846	9.939	0.097	0.2	0.012	0.132	1.183	0.009	0.012	0.017	0.001	0.015	0.012	0.044	2.984	0.073	0.038	0.087	0.61	0.525464
ENSG00000165509	MAGEC3	0.005	0.005	0.565	0.007	0.002	0.016	0.003	0.059	0.007	0	0	0	0	0.008	0.047	0.037	0.014	0.006	0	0	0.525276
ENSG00000006128	TAC1	3.193	1.025	5.031	0.547	0.011	0	0.484	4.596	0.001	0.013	0	0	2.99	0.002	0	0.131	0.165	0.115	0.137	0.42	0.525245
ENSG00000184611	KCNH7	0.682	0.232	10.397	0	0	0.047	0.045	0.194	0.003	0	0.023	0	0	0.004	0.072	1.583	0	0.005	0	0.048	0.525236
ENSG00000184634	MED12	7.539	13.167	36.951	25.762	18.503	39.054	15.243	15.632	3.108	16.271	18.04	3.667	21.166	4.062	15.233	13.595	10.894	5.288	6.939	15.904	0.525068
ENSG00000204183	GDF5OS	0.089	0.151	0.033	0.212	0.012	0	0.005	0.031	0.001	0	0.026	0.008	0	0.055	0	0	0	0	0	0	0.525046
ENSG00000107863	ARHGAP21	8.627	10.748	73.058	35.667	14.191	10.851	10.809	14.312	24.516	1.64	9.599	28.462	14.523	33.174	11.873	9.431	7.788	13.067	12.979	7.606	0.5249
ENSG00000100842	EFS	13.934	28.758	107.876	3.44	2.473	0.077	7.67	12.306	1.633	9.743	0	0.384	13.05	1.552	0.028	6.392	36.041	2.214	10.067	2.887	0.524749
ENSG00000070087	PFN2	43.88	108.863	726.726	74.68	64.939	1.074	40.554	41.286	132.914	34.301	1.305	111.9	32.58	214.725	71.367	143.289	20.799	28.198	28.089	20.697	0.524734
ENSG00000179455	MKRN3	0.004	0.028	10.99	0.808	0.301	0.151	0.158	0.312	0	0.411	0.142	0	0.007	0.031	0.247	0.225	0.85	0.077	0.095	0.668	0.524505
ENSG00000162728	KCNJ9	0.026	0.061	1.392	0.017	0.003	0.056	0.033	0.24	0.001	0.012	0.455	0	0.01	0	0	0.004	0.033	0.035	0.124	0.047	0.524224
ENSG00000181450	ZNF678	9.639	9.905	3.281	0.72	0.585	7.785	2.84	2.853	1.069	0.168	1.394	0.607	0.731	1.026	0.784	3.253	0.777	0.626	1.323	1.215	0.52391
ENSG00000156587	UBE2L6	30.566	21.032	87.973	16.596	19.921	71.22	19.498	22.277	42.452	27.115	44.755	29.688	21.838	46.878	16.02	12.334	19.85	7.313	39.21	12.128	0.523907
ENSG00000136450	SRSF1	79.666	122.941	75.159	55.41	44.698	88.704	64.774	73.345	71.578	39.802	28.956	53.87	63.68	65.098	44.427	30.609	57.636	46.158	78.356	46.839	0.523821
ENSG00000104897	SF3A2	83.635	106.078	278.179	97.654	168.475	57.403	45.077	45.4	9.127	234.342	90.168	26.242	143.87	10.129	17.167	85.693	56.197	20.222	50.831	80.918	0.523811
ENSG00000183808	RBM12B	11.77	12.467	8.171	3.88	2.102	13.303	14.562	14.412	3.222	1.792	2.134	2.365	3.193	3.93	2.028	3.584	4.135	4.253	1.952	4.263	0.52374
ENSG00000219438	FAM19A5	13.152	11.896	19.669	0.073	0.089	0.789	1.165	1.506	0.006	18.597	0	0.009	3.166	0.085	0.005	1.145	3.238	0.232	1.648	4.295	0.523572
ENSG00000165119	HNRNPK	165.072	252.653	144.937	91.314	86.167	225.266	122.893	128.306	157.185	71.925	111.558	119.726	100.334	147.74	114.431	63.17	117.008	91.928	128.626	76.197	0.523477
ENSG00000174498	IGDCC3	50.322	57.799	12.497	0	0	0	0.579	0.799	0	0.023	0.011	0	0.001	0.021	0.013	0.003	0.044	0.017	0.128	0.023	0.523436
ENSG00000151208	DLG5	21.101	28.417	34.33	21.761	23.73	2.774	20.253	18.85	14.552	8.896	7.157	24.363	34.228	11.639	7.189	14.55	17.803	7.586	10.845	14.565	0.523434
ENSG00000118922	KLF12	2.72	7.111	29.375	5.595	4.413	9.637	1.857	4.045	2.974	2.558	24.479	3.486	2.974	7.32	5.011	4.172	2.152	3.109	1.991	0.831	0.523368
ENSG00000185737	NRG3	1.335	1.679	6.455	0.089	0.022	0	0.088	0.373	0	2.691	0	0	0.031	0	1.153	1.827	0.043	0.021	0.059	0.203	0.523362
ENSG00000197372	ZNF675	18.441	19.404	8.154	1.212	1.323	12.718	8.466	6.766	7.933	0.496	6.659	3.951	1.462	2.726	0.892	6.237	5.963	1.509	4.773	2.518	0.523205
ENSG00000121988	ZRANB3	1.957	3.374	1.217	1.246	0.582	3.627	1.345	1.41	1.734	0.323	1.019	1.577	0.295	1.129	0.422	1.38	0.562	0.429	0.658	0.487	0.522985
ENSG00000075702	WDR62	15.756	17.744	9.764	10.061	16.926	1.5	1.27	1.497	1.93	17.546	1.855	8.48	0.489	2.586	7.619	0.245	1.91	7.508	1.744	0.753	0.522866
ENSG00000067445	TRO	12.61	15.816	35.367	2.169	0.789	17.336	4.255	8.494	0.309	3.895	0.535	0.09	4.53	3.151	15.415	7.995	2.061	0.608	0.98	15.408	0.522764
ENSG00000179468	OR9A2	0	0	0.171	0	0.015	0	0	0	0	0	0.044	0	0.004	0	0.026	0	0	0	0	0	0.522717
ENSG00000167670	CHAF1A	69.544	59.143	13.622	13.475	46.082	13.212	7.555	7.379	8.322	21.373	8.433	25.849	1.543	8.663	12.715	2.203	9.574	3.977	10.392	6.165	0.522614
ENSG00000100884	CPNE6	0.009	0.005	3.873	0.002	0	0.006	0.01	0.069	0	0.011	0.116	0	0.002	0	0	0.013	0.263	0.005	0.065	0.026	0.522557
ENSG00000133063	CHIT1	0.002	0.004	1.352	0	0	0.035	0.033	0.04	0.015	0	0.307	0	0.019	0	0	0.026	0.012	0.011	0.017	0.074	0.52253
ENSG00000135069	PSAT1	121.193	194.173	79.331	224.581	21.806	0.102	1.812	3.069	53.453	86.91	0.866	114.695	35.952	44.108	16.616	18.706	8.759	1.975	27.556	15.458	0.522328
ENSG00000108231	LGI1	0.027	11.574	5.282	0	0	0	0.095	1.352	0	0	0	0	0	0.004	0	0.842	0.677	0.028	0.09	0.11	0.522005
ENSG00000249034	NA	1.24	0.609	0.482	0	0	0.013	0.034	0.158	0.009	0	0	0.03	0.026	0.002	0	0.158	0	0.003	0	0.073	0.521973
ENSG00000021776	AQR	15.759	20.481	9.358	8.146	5.408	12.052	9.998	9.823	12.855	3.711	12.581	10.133	10.503	13.405	8.087	9.847	5.839	3.328	5.853	3.858	0.521612
ENSG00000079841	RIMS1	0.305	0.446	2.99	0.005	0.003	0	0.32	0.821	0.004	0.027	0	0.008	0.068	0.179	0.041	0.138	0.236	0.001	0.614	0.225	0.521577
ENSG00000110786	PTPN5	2.804	1.539	7.613	0.011	0.004	0.108	0.086	0.435	0	0	0	0	0.135	0.001	0.002	0.073	0.51	2.796	0.141	0.535	0.521539
ENSG00000158578	ALAS2	0.194	0.022	12.769	0	0	0.543	1.82	8.061	0.002	0	1.333	0	0	0.003	0	0.217	0.007	0.008	0	0.172	0.521245
ENSG00000138696	BMPR1B	0.436	1.478	3.031	0.015	0.034	2.047	0.05	0.692	0.4	0.421	0.022	0.538	0.443	0.178	0.134	1.059	0.151	0.156	0.522	0.628	0.521044
ENSG00000165392	WRN	12.225	14.502	5.663	5.633	2.726	13.721	8.569	8.093	5.001	1.097	6.228	3.734	8.94	5.935	3.657	5.32	3.643	1.94	3.97	4.14	0.520863
ENSG00000072071	LPHN1	62.512	35.602	45.919	1.591	1.633	9.604	7.993	11.962	2.939	10.755	10.748	3.862	7.387	0.706	4.457	15.987	11.352	7.72	9.662	15.264	0.520724
ENSG00000118655	DCLRE1B	4.854	7.036	5.4	6.13	14.199	4.997	3.293	3.654	4.328	8.056	2.06	6.874	2.133	3.398	4.106	1.818	2.542	1.557	3.076	1.171	0.520719
ENSG00000204469	PRRC2A	86.121	95.62	102.586	133.626	150.86	65.664	38.431	41.073	14.719	124.175	60.583	28.62	81.361	16.202	32.886	59.545	46.565	45.895	33.755	66.531	0.520559
ENSG00000197024	ZNF398	24.06	17.735	7.586	4.818	4.881	6.488	5.19	5.643	5.59	4.528	7.222	5.992	4.315	4.144	4.463	6.491	4.798	3.035	3.395	3.608	0.520476
ENSG00000128059	PPAT	27.619	32.514	5.363	3.146	2.615	12.281	5.926	5.959	9.155	2.517	1.218	8.274	5.084	4.966	2.791	3.101	2.464	2.117	3.142	2.058	0.520451
ENSG00000167971	CASKIN1	1.926	2.048	8.891	0.955	0.032	3.178	3.357	3.668	0.066	0.77	2.263	0.129	0.091	0.012	0.14	2.009	0.97	1.629	0.501	3.114	0.520402
ENSG00000181291	TMEM132E	0.198	0.337	3.217	0.006	0.01	0.004	0.02	0.313	0	0	0.083	0	0.075	0.001	0.008	0.339	0.213	0.025	0.154	0.272	0.520316
ENSG00000089050	RBBP9	6.766	12.668	11.96	10.408	7.909	9.644	15.434	14.352	12.043	6.695	2.996	10.768	6.478	9.161	6.571	9.08	5.479	3.787	9.055	3.795	0.520281
ENSG00000196470	SIAH1	9.802	17.881	24.605	6.333	3.441	16.135	15.478	15.282	8.084	7.919	20.968	5.811	22.582	7.574	7.445	8.374	6.472	5.673	9.038	5.829	0.520271
ENSG00000155189	AGPAT5	43.203	48.708	13.193	7.552	5.05	18.675	14.588	13.935	14.548	6.247	4.011	16.199	18.569	9.999	14.475	8.003	6.126	5.167	7.422	3.396	0.520122
ENSG00000165194	PCDH19	0.335	1.557	2.878	0.032	0.106	0.007	0.239	0.659	0.006	0.005	0	0.019	0.354	0.036	1.123	0.084	0.911	0.192	0.026	0.094	0.519846
ENSG00000204449	TRIM49L2	0	0	0.02	0.021	0	0	0	0.002	0.004	0	0	0.003	0	0	0	0	0.003	0	0	0	0.519746
ENSG00000172379	ARNT2	2.822	6.801	58.61	7.348	11.527	0.49	2.364	4.231	0.104	10.435	0.006	0.31	1.203	20.769	0.036	12.811	2.115	0.937	1.483	3.63	0.519737
ENSG00000154654	NCAM2	0.411	0.898	5.284	0.196	0.158	0.032	0.217	3.295	0.031	0.685	0.026	0	0.081	1.587	0.074	0.062	0.617	0.215	0.081	0.051	0.519708
ENSG00000134283	PPHLN1	10.597	8.813	8.91	5.727	3.272	11.159	7.096	7.37	11.347	2.915	7.934	8.136	8.204	9.032	4.074	5.044	3.809	3.964	5.8	3.887	0.519568
ENSG00000149243	KLHL35	0.117	0.159	17.68	0.932	0.425	0.288	0.198	0.326	0.221	1.281	0.233	0.158	0.193	0.142	0.804	1.345	0.183	0.147	0.512	0.89	0.519534
ENSG00000100027	YPEL1	4.973	5.891	31.933	0.456	0.111	11.668	3.73	5.599	0.012	0.577	19.537	0.019	0.196	0.315	3.457	1.202	2.664	2.621	3.921	4.327	0.519399
ENSG00000143033	MTF2	28.569	31.205	11.61	2.57	1.893	32.465	11.227	11.245	7.304	1.806	10.076	6.21	6.946	3.467	5.602	4.871	5.482	3.243	5.341	7.1	0.519293
ENSG00000101654	RNMT	17.011	20.589	15.573	11.82	4.292	14.527	16.848	14.818	11.763	6.478	22.922	9.649	19.607	10.194	6.982	10.106	6.559	10.31	7.75	3.868	0.519291
ENSG00000205581	HMGN1	98.285	81.163	49.699	24.304	22.44	108.906	55.635	57.794	34.002	11.115	29.925	26.37	35.294	27.209	30.816	29.973	32.196	7.62	35.517	32.478	0.519269
ENSG00000149948	HMGA2	23.27	47.51	0.121	33.8	54.815	6.238	4.929	2.883	25.03	0.083	0.025	12.723	1.701	2.914	3.864	0.043	0.044	0.043	0.222	0.134	0.519204
ENSG00000117154	IGSF21	16.602	3.136	11.654	0	0	0	0.151	0.19	0	0.005	0	0	0	0.002	0	1.616	1.759	0.31	0.607	0.562	0.519144
ENSG00000176912	C18orf56	27.015	10.324	4.707	2.785	2.237	9.818	6.75	5.9	0.515	7.23	0.731	1.397	0.28	0.403	3.178	0.285	0.678	0.01	1.608	0.449	0.519053
ENSG00000183186	C2CD4C	3.088	5.384	6.333	0.1	0.148	0	0.546	1.999	2.926	0.024	0	0.455	0.215	0.023	0.314	0.305	0.598	1.32	0.455	3.828	0.518961
ENSG00000148688	RPP30	8.782	12.367	5.63	4.565	5.624	7.299	3.967	4.301	5.066	3.597	4.731	4.675	5.169	4.666	3.352	3.459	4.438	5.264	6.373	3.399	0.518782
ENSG00000135829	DHX9	66.638	130.874	63.651	33.63	36.985	94.505	58.681	61.962	92.299	25.143	63.915	76.12	71.717	82.7	57.834	43.429	24.341	28.358	28.89	15.432	0.518754
ENSG00000170035	UBE2E3	22.533	47.99	52.18	39.968	47.201	29.103	13.037	16.631	26.989	13.78	12.377	26.047	9.847	32.339	24.947	26.525	14.659	17.123	42.915	15.944	0.518744
ENSG00000124795	DEK	100.345	127.834	55.479	31.881	28.095	105.451	53.1	49.74	19.818	8.488	41.418	30.741	55.322	57.71	11.033	27.687	36.557	26.934	55.129	17.32	0.518647
ENSG00000120658	ENOX1	0.172	0.382	25.326	5.393	1.21	0.524	0.444	1.736	0.871	0.481	0.058	1.754	0.245	3.883	0.166	1.866	1.518	1.9	1.816	0.436	0.518455
ENSG00000131899	LLGL1	19.11	32.816	44.092	20.768	23.862	6.398	7.482	7.74	13.883	32.701	11.814	27.535	4.315	10.107	37.419	5.734	13.865	5.239	9.996	10.633	0.518383
ENSG00000162373	BEND5	1.523	2.614	11.911	0.574	0.073	4.328	1.31	1.892	0.009	0.396	0.478	0.06	1.673	0.088	0.009	3.63	1.417	0.515	1.057	1.835	0.518378
ENSG00000127081	ZNF484	4.247	5.791	8.132	1.945	1.125	3.83	4.27	3.959	3.098	0.695	9.292	2.075	2.284	3.617	0.864	4.795	1.07	1.704	1.718	1.719	0.518346
ENSG00000126814	TRMT5	7.499	10.15	4.77	6.988	2.674	4.79	6.36	6.975	5.711	2.456	0.643	3.94	3.718	4.647	1.893	4.595	4.365	2.207	3.94	3.453	0.518273
ENSG00000116747	TROVE2	16.856	13.368	8.289	5.464	4.761	12.826	11.645	11.531	7.13	2.412	11.735	6.113	5.515	11.689	2.946	5.602	4.269	6.757	4.704	4.133	0.518259
ENSG00000165246	NLGN4Y	19.903	13.018	6.266	2.948	2.811	0	1.715	2.276	0.035	0.268	0.131	0.005	0.012	3.305	4.269	2.483	1.666	0.296	0.172	0.723	0.518126
ENSG00000151846	PABPC3	8.746	6.569	16.255	20.091	12.559	36.075	13.934	13.568	6.677	15.246	27.585	2.834	15.503	4.444	2.479	8.033	0.892	0.122	0.836	0.153	0.517836
ENSG00000135144	DTX1	2.51	2.009	26.619	0.011	0.005	0.547	1.481	2.846	0.004	0.006	2.405	0.015	0.796	0.003	0.067	3.57	0.485	0.481	0.706	3.86	0.517691
ENSG00000183943	PRKX	30.251	15.265	15.977	3.836	4.381	14.543	4.909	3.666	13.191	3.84	26.225	10.89	2.217	3.695	6.398	3.413	4.897	1.69	3.496	4.219	0.517554
ENSG00000181195	PENK	0.33	0.441	37.626	2.145	0.952	0.012	0	24.058	0.004	0	0.017	0.008	0.542	1.006	0	0.023	0.268	0.06	0.037	0.015	0.517367
ENSG00000180537	RNF182	4.007	5.555	5.657	0.845	0.381	0.195	0.403	0.741	1.511	6.786	0.044	0.23	0.145	5.225	0.338	0.912	0.068	0.02	0.047	0.334	0.517276
ENSG00000152954	NRSN1	0.153	0.073	11.19	0	0	0	0.15	2.967	0	0	0	0	0	0	0	1.133	0.046	0.005	0.209	0.209	0.517125
ENSG00000205279	CTXN3	0.003	0	0.507	0	0	0	0	0.009	0.168	0	0	0.014	0.007	0	0	0	0.05	0	0	0	0.517123
ENSG00000151640	DPYSL4	7.884	10.726	85.762	3.999	5.415	0.267	0.606	2.226	6.75	18.56	0.28	5.418	6.87	0.775	22.904	6.437	0.69	10.708	0.97	1.661	0.517066
ENSG00000187902	SHISA7	0.949	0.182	20.423	0.008	0.011	0.021	0.148	0.768	0.002	0.073	0.034	0.002	0.003	0	0	3.148	0.015	0.003	0	0.114	0.516901
ENSG00000187122	SLIT1	0.34	0.758	62.315	0.038	0.04	0.103	0.079	1.032	0.004	0.021	0.314	0.001	0.373	0.015	0.037	6.618	0.097	0.064	0.051	1.05	0.51686
ENSG00000204842	ATXN2	7.481	6.241	22.285	17.72	14.146	7.584	4.784	5.885	2.472	9.355	4.491	2.695	11.075	3.336	6.101	14.628	4.188	4.182	2.731	6.277	0.516798
ENSG00000213923	CSNK1E	60.588	29.675	172.964	61.296	59.163	23.48	16.467	21.288	44.999	70.177	21.05	62.406	51.563	25.633	74.844	19.906	37.617	25.691	29.264	44.374	0.516478
ENSG00000163257	DCAF16	27.897	16.876	18.065	13.718	12.274	33.395	23.747	26.029	10.578	3.663	23.866	8.93	8.89	13.714	10.434	13.754	9.519	6.725	6.196	11.228	0.51644
ENSG00000198756	GLT25D2	3.093	3.429	4.77	1.63	0.692	0.569	0.314	0.633	0.004	0.109	2.461	0.018	0.042	2.464	0.01	2.915	0.414	0.77	0.304	1.332	0.516428
ENSG00000169750	RAC3	66.316	52.829	52.937	16.275	26.691	9.938	2.141	5.085	11.938	40.643	0.508	15.531	1.02	3.665	64.448	2.352	6.007	1.377	12.136	8.145	0.516408
ENSG00000188474	NA	11.63	15.165	3.367	2.134	1.641	2.93	4.138	4.097	0.678	0.611	0.123	0.07	0.929	2.79	0.707	0.605	2.063	1.652	2.649	1.745	0.516227
ENSG00000181418	DDN	0.101	0.079	5.405	0.057	0.064	0.487	0.144	0.331	0.117	0.507	0.244	0.099	0.36	0.053	0.07	0.237	0.118	0.58	0.241	0.091	0.516174
ENSG00000144395	CCDC150	4.957	2.423	0.815	0.496	0.463	0.434	1.607	1.786	0.36	0.107	0.113	0.29	0.051	0.237	0.297	0.148	0.25	0.062	0.113	0.1	0.516125
ENSG00000033122	LRRC7	0.017	0.186	10.92	0.003	0.01	0.14	0.275	0.805	0.133	0	0.057	0.013	0	0.008	0.328	0.293	0.152	0.063	0.087	1.105	0.515929
ENSG00000105649	RAB3A	9.752	3.853	288.553	0.805	2.278	0.732	0.924	3.092	0.409	33.975	6.77	1.771	0.827	4.569	0.823	23.856	2.537	15.443	2.695	2.982	0.515763
ENSG00000170616	SCRT1	0.097	0.095	30.653	0	0	0	0.025	0.326	0	0	0	0	0	0	0	2.745	0.022	0.013	0	0.742	0.515736
ENSG00000204681	GABBR1	17.58	16.173	69.308	10.589	7.594	15.02	4.224	8.976	6.138	1.63	24.22	5.701	14.28	2.728	22.878	9.727	13.421	5.304	4.245	19.721	0.515706
ENSG00000175792	RUVBL1	33.573	50.213	15.804	42.014	31.314	24.524	16.662	16.527	43.289	20.569	11.89	48.522	19.881	23.293	22.234	6.895	7.494	14.485	10.38	5.95	0.515704
ENSG00000157103	SLC6A1	0.131	0.171	63.894	0	0	0	0.291	0.493	0.001	0	0	0	0.011	0	0	0.298	5.847	0.538	0.026	0.616	0.515648
ENSG00000141314	RHBDL3	2.198	4.248	2.756	0.012	0.047	0.05	0.244	0.501	0	0.421	0.01	0.025	0.204	0.223	0.032	0.415	0.7	1.151	0.597	0.491	0.5156
ENSG00000197006	METTL9	56.844	65.769	59.329	48.123	64.566	85.743	58.128	51.436	35.33	107.276	35.918	35.588	23.108	44.161	29.389	37.157	23.479	19.56	62.155	13.087	0.515456
ENSG00000143799	PARP1	112.438	130.074	42.921	25.529	35.079	67.823	19.422	22.49	25.291	26.654	16.389	33.071	33.47	30.022	28.531	29.357	16.259	48.692	19.781	14.06	0.515438
ENSG00000165572	KBTBD6	4.533	8.255	13.305	5.121	3.198	2.825	6.287	7.052	4.511	5.145	1.067	7.616	2.575	5.291	2.881	7.892	3.308	3.367	3.562	3.752	0.515265
ENSG00000204519	ZNF551	10.583	13.747	2.845	2.355	1.772	12.065	7.536	7.567	6.977	1.266	7.678	5.689	4.248	2.804	1.477	2.299	2.155	2.599	1.22	1.39	0.51508
ENSG00000171189	GRIK1	0.013	0.08	2.174	0.309	0.033	0.06	0.215	1.004	0	0.03	0.299	0.002	0	0.003	0	0.027	0.493	0.002	0.091	0.019	0.515059
ENSG00000183137	CEP57L1	2.222	3.33	5.063	2.907	1.537	7.556	2.268	2.78	1.666	0.453	0.834	1.941	0.424	3.255	1.282	1.662	1.358	1.317	2.366	1.516	0.514999
ENSG00000107614	TRDMT1	2.863	3.854	1.842	1.567	0.869	4.639	1.437	1.498	1.039	0.603	2.202	0.735	0.441	1.653	1.427	1.136	0.692	0.881	1.459	0.948	0.514589
ENSG00000184845	DRD1	0.053	0.296	4.552	0	0	0	0.054	0.034	0.005	0	0	0	0.014	0.718	0	0.381	0.319	0	0	0	0.514582
ENSG00000147100	SLC16A2	28.041	20.738	25.76	26.299	39.224	5.544	3.09	4.208	35.822	2.265	0.056	35.508	4.334	19.158	3.343	6.873	5.464	4.908	3.221	3.824	0.514499
ENSG00000082068	WDR70	5.226	6.486	8.148	5.095	3.243	9.752	5.25	5.493	6.363	1.794	6.374	4.679	4.852	6.856	2.186	3.587	3.797	2.881	6.455	3.413	0.514295
ENSG00000170075	GPR37L1	0.222	0.049	6.639	0	0	0.019	0.09	0.111	0.003	0.05	0.114	0.041	1.267	0	0	0.099	0.209	0.032	0.102	0.302	0.513968
ENSG00000188647	PTAR1	17.292	11.254	9.345	8.25	4.857	22.1	11.92	12.261	6.364	3.545	14.415	3.139	9.571	6.617	3.278	8.526	4.401	3.859	3.959	4.019	0.513952
ENSG00000132780	NASP	96.648	103.608	32.752	9.798	16.428	37.273	20.73	24.224	8.604	6.297	10.489	12.825	22.936	10.063	10.921	7.697	21.456	15.422	19.015	20.041	0.513808
ENSG00000011426	ANLN	43.995	39.987	8.46	30.341	24.561	1.511	6.595	9.549	15.077	9.407	0.712	32.554	0.348	25.156	8.045	0.125	3.889	0.307	4.001	0.158	0.513608
ENSG00000012048	BRCA1	7.732	12.816	3.52	4.81	5.691	5.524	4.391	3.752	5.054	1.92	0.98	10.661	0.244	4.341	2.608	3.612	1.613	1.41	1.727	1.034	0.513579
ENSG00000180336	C17orf104	1.127	1.372	0.068	0.111	0.043	0.785	0.673	0.675	0.017	0.036	0.687	0.039	0.044	0.025	0.047	0.019	0.033	0.021	0.053	0.034	0.513547
ENSG00000251246	NA	7.926	9.694	9.233	0.541	1.456	1.957	6.83	8.058	5.417	4.396	0.839	3.649	3.387	0.398	5.126	1.928	6.334	1.55	2.781	1.115	0.513215
ENSG00000197928	ZNF677	1.444	0.765	1.62	0.516	0.283	0.864	1.193	1.091	0.442	0.07	0.206	0.245	0.516	0.525	0.305	0.514	0.522	0.817	0.724	0.497	0.513087
ENSG00000125869	C20orf103	0.359	1.918	22.861	0.085	0.021	0.034	0.59	2.915	0.005	0	1.867	0.025	0.15	7.698	0.043	1.463	0.209	0.039	0.642	0.19	0.513063
ENSG00000170325	PRDM10	4.889	5.775	10.733	1.884	3.88	3.716	5.593	5.746	4.134	2.281	6.111	4.403	6.589	2.568	5.182	4.931	4.101	1.632	2.702	4.252	0.513036
ENSG00000184613	NELL2	26.086	15.115	22.989	0.069	0.006	0.055	17.312	33.631	0.115	0.012	26.297	0.016	0.385	0.011	0.022	0.519	4.287	0.007	0.121	0.164	0.512959
ENSG00000205060	SLC35B4	26.785	17.186	4.7	10.775	10.869	8.594	5.979	5.548	8.197	13.326	3.916	8.916	2.461	12.538	7.899	2.793	3.49	2.964	2.679	2.623	0.512766
ENSG00000119772	DNMT3A	27.671	30.952	17.256	2.356	2.003	22.865	17.628	15.95	0.944	3.568	11.308	0.707	3.457	1.272	6.049	5.074	4.946	4.434	6.805	16.498	0.512464
ENSG00000205838	TTC23L	0.92	0.328	0.487	0.01	0	0.301	0.274	0.385	0.018	0.053	0.065	0.016	0.238	0.016	0.015	0.288	0.057	0.019	0.03	0.128	0.512279
ENSG00000162456	KNCN	0	0	0.136	0	0	0.008	0.005	0.061	0	0	0	0	0.013	0	0	0.014	0	0	0	0	0.512276
ENSG00000153147	SMARCA5	57.451	69.431	26.499	12.371	9.257	44.061	26.238	25.515	15.914	5.062	16.505	11.933	34.119	16.979	7.132	23.395	13.435	14.613	18.539	10.277	0.511729
ENSG00000132692	BCAN	3.02	0.929	313.053	0.247	0.041	0.01	1.2	5.211	0.001	133.763	0.023	0	0.209	0.015	0.069	0.034	0.068	0.046	0.031	0.068	0.511549
ENSG00000167258	CDK12	14.632	18.997	10.127	17.359	12.868	16.969	15.569	14.449	14.914	6.301	22.259	14.566	15.987	11.209	7.716	10.873	8.075	6.285	6.506	9.721	0.511471
ENSG00000124571	XPO5	18.823	31.287	13.923	13.09	11.173	13.106	8.64	9.998	24.562	12.714	8.21	22.994	17.008	11.605	12.885	10.005	5.579	5.297	4.807	9.358	0.511438
ENSG00000151503	NCAPD3	8.619	12.159	7.363	6.593	12.173	8.498	5.171	5.548	8.274	7.061	7.29	15.468	1.972	6.752	8.914	4.62	2.56	2.209	2.94	2.387	0.511287
ENSG00000176148	TCP11L1	4.69	5.541	11.4	7.615	7.481	8.246	4.314	4.715	11.219	3.34	4.813	9.986	4.143	10.509	5.891	4.197	3.037	2.237	3.293	4.106	0.511173
ENSG00000163006	CCDC138	12.103	20.749	3.093	0.753	0.625	8.057	2.82	2.491	2.237	0.68	1.037	1.74	0.457	1.201	0.783	1.138	2.26	0.483	1.935	0.834	0.511072
ENSG00000092853	CLSPN	17.237	17.604	2.842	2.088	12.164	2.063	2.02	2.305	2.371	1.402	0.543	8.531	0.13	7.157	1.643	0.111	0.674	0.153	1.703	0.135	0.511018
ENSG00000177103	DSCAML1	0.087	0.052	67.043	0.007	0	0.009	2.18	0.972	0.001	0.004	0.161	0.008	0.108	0	0	5.708	0.534	0.215	0.354	2.987	0.510763
ENSG00000064692	SNCAIP	2.199	1.743	13.3	0.284	0.283	0.049	1.377	1.883	0.002	0	0.006	0.003	0.817	0.492	4.235	0.12	0.591	0.222	2.572	0.278	0.510602
ENSG00000111674	ENO2	20.529	26.107	100.516	11.684	11.781	15.819	1.085	6.533	0.586	48.013	12.221	4.327	10.017	14.075	5.369	29.456	17.72	8.765	7.773	10.032	0.510565
ENSG00000101349	PAK7	0.322	0.518	23.478	0	0.002	0	0.17	0.994	0.008	0	0	0.065	0.431	0.001	0	1.905	0.3	0	0.157	1.826	0.510539
ENSG00000079246	XRCC5	175.033	246.091	87.246	63.486	55.747	108.944	75.963	77.285	124.482	48.267	54.99	111.343	95.766	114.978	62.408	69.765	53.166	57.219	70.195	28.743	0.510522
ENSG00000067191	CACNB1	4.567	3.485	23.604	11.4	6.502	2.891	0.724	2.214	2.853	1.791	6.339	4.702	3.239	2.145	3.368	2.246	3.178	4.977	2.305	9.495	0.510259
ENSG00000080345	RIF1	18.4	23.908	6.243	6.066	4.664	22.09	9.95	9.273	5.177	1.408	9.123	5.101	16.638	7.372	2.122	5.185	3.508	3.271	2.993	3.587	0.510227
ENSG00000051180	RAD51	9.608	15.132	4.994	3.417	12.444	4.056	3.358	3.05	3.317	6.155	1.311	13.263	0.231	4.197	6.78	0.144	1.26	0.167	2.678	0.177	0.510207
ENSG00000149679	CABLES2	5.02	8.48	14.155	4.927	14.697	3.752	5.516	4.892	2.611	9.428	7.9	5.092	4.834	2.996	8.159	4.892	3.447	7.836	3.393	3.053	0.510113
ENSG00000120334	CENPL	3.864	4.804	2.757	4.18	3.127	2.357	1.927	2.053	2.529	2.274	1.285	4.052	2.537	3.787	2.419	0.591	1.398	1.695	3.598	0.609	0.509976
ENSG00000166153	DEPDC4	1.16	1.033	0.304	0.514	0.236	0.776	0.95	1.119	0.46	0.11	0.085	0.273	0.041	0.24	0.046	0.252	0.182	0.196	0.218	0.38	0.509847
ENSG00000177108	ZDHHC22	51.7	14.707	19.155	0.006	0.008	0	0.065	0.98	0	0.053	0	0	0.002	0.002	0.039	0.394	0.018	0	0	0.068	0.509767
ENSG00000165409	TSHR	0.009	0.008	1.27	0	0.002	0.024	0.027	0.044	0.003	0	0.221	0	0.001	0	0.001	0.127	0.007	0.013	0	0.065	0.509606
ENSG00000152990	GPR125	18.594	18.462	15.257	5.144	4.444	6.528	15.156	14.485	12.714	5.345	0.992	14.765	8.463	5.026	6.587	6.752	3.634	4.693	5.32	11.994	0.509334
ENSG00000134748	PRPF38A	34.13	27.511	33.333	15.911	7.218	46.819	26.921	25.725	14.523	8.96	20.803	14.649	36.208	16.495	8.476	12.376	15.704	12.228	21.451	10.783	0.509315
ENSG00000188629	ZNF177	2.369	2.285	7.376	1.024	0.261	3.541	2.093	2.237	1.394	0.163	0.74	0.548	2.501	0.918	0.919	2.718	1.495	1.587	0.776	2.137	0.509304
ENSG00000148798	INA	18.756	8.861	320.494	4.357	7.243	0.031	0.833	11.393	3.898	0.569	0	4.247	0.48	4.708	0.323	66.286	1.01	0.02	2.216	5.229	0.50918
ENSG00000146216	TTBK1	0.17	0.538	12.652	0.025	0.006	0.006	0.936	1.69	0	0.016	0	0.002	0.005	0.012	0.03	2.033	0.094	0.082	0.143	0.805	0.509032
ENSG00000104967	NOVA2	4.579	6.135	36.906	0.037	0.039	0	0.527	1.404	0.009	0.014	0	0.016	0.017	0.007	5.024	4.932	1.453	2.417	1.37	3.979	0.508989
ENSG00000146757	ZNF92	20.861	20.652	7.878	0.771	1.031	16.511	8.087	7.302	2.092	0.58	8.415	1.607	4.4	2.793	0.838	3.854	6.39	1.901	4.092	2.639	0.508885
ENSG00000099284	H2AFY2	7.769	77.483	54.971	6.397	5.12	4.428	30.545	34.258	13.058	7.71	2.485	21.82	20.472	10.434	0.048	17.697	14.013	12.131	12.144	12.899	0.508774
ENSG00000120162	MOB3B	13.213	9.168	38.788	0.114	0.164	0.804	24.739	24.325	31.391	5.691	1.984	15.953	6.665	0.108	0.031	3.016	3.012	0.514	8.129	2.883	0.50867
ENSG00000163714	U2SURP	38.103	32.966	16.001	12.125	5.855	35.138	23.712	24.59	15.054	1.839	19.59	11.524	18.478	12.33	4.441	12.748	11.357	7.357	9.081	13.308	0.508506
ENSG00000141510	TP53	49.506	78.362	28.18	43.615	33.501	29.261	20.305	18.661	20.151	50.942	12.663	40.294	48.44	19.444	53.894	8.925	16.466	4.629	12.693	10.879	0.508505
ENSG00000162944	RFTN2	1.54	3.921	33.969	0.432	0.148	0.045	1.492	2.504	0.14	0.93	0.172	0	0.005	0.434	2.826	1.62	1.571	1.606	4.359	2.264	0.508489
ENSG00000221932	HEPN1	0	0	1.074	0	0.007	0	0.012	0.003	0	0	0.032	0	0.078	0	0	0	0.01	0.017	0	0.11	0.508422
ENSG00000232387	SKA2L	0.926	1.397	4.004	3.103	2.681	1.099	1.531	1.216	3.004	2.624	0.494	0.168	0.585	2.05	0.526	0.97	1.479	0.932	2.188	0.667	0.508413
ENSG00000149403	GRIK4	1.242	0.294	1.302	0.003	0.005	0.004	0.644	0.431	0.002	0.025	1.187	0	0.082	0.329	0.543	0.01	0.095	0.014	0.104	0.006	0.508385
ENSG00000116147	TNR	0.016	0.086	12.868	0.004	0	0.002	0.453	0.868	0.001	0.024	0.118	0.003	0.001	0	0.119	1.881	0.035	0.001	0.002	0.17	0.508309
ENSG00000204392	LSM2	84.376	72.385	66.543	53.026	59.126	64.917	21.259	22.102	33.734	95.426	12.036	67.933	26.384	24.83	53.93	22.213	25.634	27.554	47.986	21.149	0.50813
ENSG00000126787	DLGAP5	65.497	57.385	11.47	7.464	4.061	0.9	6.033	6.027	6.597	2.628	0.202	15.086	0.01	12.998	5.828	0.024	0.897	0.041	2.599	0.021	0.507834
ENSG00000117523	PRRC2C	85.889	48.301	32.556	44.954	38.451	40.471	35.359	34.925	28.994	4.998	75.541	22.265	57.376	19.435	24.867	28.959	15.493	11.481	14.144	16.87	0.507834
ENSG00000102383	ZDHHC15	2.24	1.436	3.874	0.245	0.006	3.088	0.713	0.857	0	0	0.05	0.002	0.149	0.069	0.012	1.803	0.884	0.832	0.244	0.525	0.507792
ENSG00000182050	MGAT4C	1.571	1.878	5.5	0	0	0	0.043	0.122	0	0	0	0	0.002	0	0	2.592	0.028	0.35	0.059	0.215	0.507699
ENSG00000185294	NA	0	0	0.013	0	0	0	0	0	0	0	0	0	0.004	0	0	0	0	0	0	0	0.507558
ENSG00000130224	LRCH2	2.207	3.117	14.72	2.516	0.789	2.665	1.062	2.673	0	0.269	0.009	0	0.702	6.021	1.125	2.024	3.457	0.585	2.544	0.747	0.507465
ENSG00000079387	SENP1	9.096	13.147	5.357	8.871	5.907	8.701	5.095	5.284	5.988	4.233	6.951	8.235	8.77	9.653	5.305	7.098	3.441	2.039	4.252	2.202	0.507374
ENSG00000102069	UBE2NL	0.016	0.171	0.048	0.01	0.045	0.099	0.04	0.118	0.045	0.043	0.038	0.024	0.047	0.047	0.034	0.04	0.006	0	0	0	0.50737
ENSG00000176571	CNBD1	0.002	0.024	0.011	0	0	0.021	0.023	0	0	0	0	0	0	0	0	0	0.005	0	0	0	0.507076
ENSG00000100154	TTC28	2.47	5.8	16.39	7.687	4.672	3.742	10.13	10.48	0.547	4.297	1.406	0.299	2.182	4.239	6.534	4.765	4.591	2.993	3.17	4.628	0.506857
ENSG00000153253	SCN3A	0.038	0.138	17.764	0.034	0.003	1.328	2.043	2.973	0.003	0.008	0.43	0.009	0.455	0.637	0.013	3.153	0.362	0.534	0.073	0.369	0.506462
ENSG00000187714	SLC18A3	0.031	1.618	1.957	0.01	0.058	0	0.042	2.247	0.004	0	0	0.003	0.012	0	0.018	0.265	0.234	0.007	0	0.054	0.506307
ENSG00000120733	KDM3B	18.678	30.186	23.97	15.029	13.842	30.237	28.414	26.615	14.874	13.121	37.072	13.327	11.93	12.671	12.704	15.02	17.2	11.112	12.61	13.781	0.506148
ENSG00000114631	PODXL2	39.708	26.608	117.62	2.956	6.839	8.427	3.226	7.268	1.768	29.451	1.939	0.119	1.652	1.106	7.155	46.5	4.122	2.076	17.349	10.439	0.506072
ENSG00000197977	ELOVL2	2.058	1.584	30.468	0.134	0.065	0.034	3.375	4.65	0.065	0.173	0.038	0	0.056	6.083	0	3.161	1.437	1.367	0.048	2.668	0.506047
ENSG00000149571	KIRREL3	0.124	0.297	10.954	0.583	1.066	0.092	0.053	0.268	0.011	0.024	0.555	0.127	0.168	1.556	0.002	2.135	0.131	0.099	0.267	0.067	0.505918
ENSG00000213096	ZNF254	16.684	16.609	11.05	1.312	1.342	8.236	11.555	10.518	3.805	0.724	4.249	1.995	3.331	4.248	2.198	8.006	4.599	2.978	5.648	4.523	0.505725
ENSG00000087365	SF3B2	32.649	40.75	30.256	38.903	56.886	32.298	24.52	24.234	17.124	28.351	33.013	21.048	41.096	19.155	16.17	29.087	21.02	18.783	24.173	23.107	0.505713
ENSG00000144868	TMEM108	4.137	1.596	10.241	0.099	0.635	0.078	0.074	0.699	0.006	1.519	0.058	0.003	2.531	0.034	0.089	2.459	2.818	0.156	0.152	0.196	0.505683
ENSG00000103489	XYLT1	11.768	6.823	9.255	23.774	25.32	16.496	7.156	6.013	6.593	3.677	18.424	8.368	4.44	9.626	0.987	1.972	5.23	7.869	1.479	1.741	0.505633
ENSG00000251695	NA	0.069	0.038	2.41	0.079	0.062	0.34	0.507	0.589	0.02	0.031	0.793	0.031	0.199	0.025	0	0.152	0.228	0.103	0.08	0.354	0.505541
ENSG00000119969	HELLS	35.766	23.73	4.347	2.404	9.137	4.873	3.879	3.993	2.73	2.082	1.656	6.452	1.396	5.633	3.797	0.514	1.995	0.107	1.407	0.476	0.505461
ENSG00000174231	PRPF8	65.535	117.993	147.324	141.225	190.998	92.579	74.24	76.435	70.644	156.899	120.908	97.648	121.923	78.975	132.588	116.798	48.363	51.256	23.917	38.685	0.505448
ENSG00000089685	BIRC5	48.757	80.265	23.445	45.896	49.579	2.336	7.217	7.447	8.644	48.1	0.58	51.219	0.147	25.453	28.627	0.165	5.32	0.169	15.88	1.077	0.505138
ENSG00000130935	NOL11	48.885	82.023	27.344	20.9	17.38	49.069	29.794	28.452	47.652	9.921	25.352	39.51	42.797	35.245	15.491	21.047	13.249	20.064	21.157	10.487	0.505135
ENSG00000174469	CNTNAP2	45.489	50.395	7.42	0	0.002	0.125	4.324	4.859	0.889	0	0.423	1.683	0.01	0.001	0.004	0.344	0.239	0.011	0.15	0.156	0.505014
ENSG00000178568	ERBB4	0.142	0.767	15.662	0.001	0.002	0	0.048	0.242	0.01	0.026	0	0	0.095	0.017	0.019	1.089	0.028	1.533	0.243	0.584	0.504992
ENSG00000154229	PRKCA	2.062	4.157	39.651	21.982	26.414	0.288	6.679	6.388	1.928	3.038	11.674	1.986	1.193	28.506	3.37	8.182	2.516	1.313	3.204	2.428	0.504903
ENSG00000132958	TPTE2	0.016	0	0.302	0.015	0.016	0.088	0.038	0.05	0.016	0.003	0.171	0	0.11	0.012	0.009	0.009	0.015	0.007	0	0.023	0.504846
ENSG00000131127	ZNF141	11.798	6.587	4.901	0.818	0.612	9.373	7.71	7.04	1.104	0.322	3.037	0.9	1.318	1.588	0.566	2.424	1.768	1.374	2.017	2.031	0.504802
ENSG00000110975	SYT10	0.93	1.085	0.355	0	0	0	0.034	0.568	0.003	0	0	0.003	0	0.001	0.001	0.047	0.042	0.005	0.222	0.015	0.504765
ENSG00000137726	FXYD6	17.233	17.856	460.326	0.367	0.025	1.039	8.182	16.77	0.003	10.947	3.684	0.112	1.142	1.514	0.663	41.722	44.404	14.498	9.41	7.281	0.504725
ENSG00000025293	PHF20	15.167	17.601	15.301	7.945	4.736	14.768	6.967	7.228	10.803	3.456	18.749	7.436	9.835	13.062	6.605	5.261	7.954	11.998	6.281	3.661	0.504541
ENSG00000131044	TTLL9	0.02	0.114	3.083	0.012	0.005	0.815	0.358	0.568	0.037	0.012	0.163	0.015	0.203	0.012	0.016	0.22	0.105	0.007	0.043	0.767	0.504527
ENSG00000163012	ZSWIM2	0.021	0.013	0.076	0.052	0.013	0.085	0.014	0.004	0.002	0	0.029	0	0.004	0.037	0	0.042	0.009	0	0	0.007	0.504361
ENSG00000213079	SCAF8	23.327	29.112	27.446	28.385	19.138	28.559	24.395	23.113	16.305	7.247	40.334	15.983	31.475	23.148	12.411	23.961	15.298	11.691	11.207	14.476	0.504311
ENSG00000136535	TBR1	0.002	0.013	0.767	0	0.001	0.006	0.003	0.003	0.004	0	0.005	0	0.217	0.003	0.023	0.02	0.004	0.001	0	0.016	0.504279
ENSG00000163288	GABRB1	0.184	0.07	3.028	0	0	0.008	0.057	0.115	0.006	0.016	0	0	0.008	0.074	0	0.132	0.007	0.568	0	0	0.504025
ENSG00000159217	IGF2BP1	81.316	109.812	5.979	6.481	9.86	0	21.521	18.99	0.003	0.529	0	0.013	0.006	0.681	7.797	0	0.011	0.007	0.007	0.009	0.503804
ENSG00000196632	WNK3	4.431	6.67	3.901	0.278	0.133	0.142	0.779	0.967	0.271	0.289	0.042	0.214	1.237	0.127	0.337	2.955	0.236	0.584	1.167	0.296	0.503631
ENSG00000154898	CCDC144C	0.286	0.099	1.071	0.103	0.046	0.903	0.23	0.208	0.117	0.033	0.429	0.011	0.378	0.12	0.071	0.09	0.089	0.195	0.053	0.288	0.5035
ENSG00000139915	MDGA2	0.182	0.472	1.233	0.003	0	0.23	0.032	0.38	0.001	1.329	0.003	0	0.002	0.001	0	0.008	0.068	0.002	0.031	0.006	0.503303
ENSG00000179240	NA	0.96	0.786	1.928	0.23	0.101	2.655	0.772	0.847	0.123	0.062	0.207	0.117	0.045	0.184	0.26	0.673	0.136	0.099	0.071	0.857	0.503118
ENSG00000165323	FAT3	7.488	4.811	2.456	0.022	0.057	0.029	0.165	0.326	0.118	0.033	0	0.017	0.026	1.397	0.118	0.16	0.952	0.008	0.07	0.07	0.503009
ENSG00000198182	ZNF607	4.009	8.082	6.104	1.718	0.69	4.929	5.442	4.797	4.243	0.614	0.781	1.968	1.369	1.589	1.525	4.145	2.793	2.368	0.977	3.595	0.502949
ENSG00000018625	ATP1A2	15.551	26.172	106.351	0.13	0.007	0	0.979	3.632	0.014	0	0.059	0.003	0.07	0.138	0.002	0.654	15.427	35.621	0.433	1.525	0.502797
ENSG00000196132	MYT1	0.588	0.535	31.098	0.004	0	0.344	0.397	1.448	0.002	0.006	0.031	0.021	0.001	0	0	4.809	0.062	0.015	0.114	1.487	0.502775
ENSG00000130713	EXOSC2	15.175	21.174	10.799	11.589	11.755	14.837	8.923	8.263	12.805	7.096	13.424	19.189	9.84	10.905	11.053	3.618	8.839	7.125	9.475	9.001	0.502768
ENSG00000181472	ZBTB2	15.8	22.005	14.001	19.002	11.791	15.126	10.18	10.902	10.431	7.13	18.973	15.4	21.862	18.81	12.352	8.224	7.761	3.872	11.948	5.498	0.502756
ENSG00000108830	RND2	19.772	26.974	6.725	0.207	0.132	0.156	0.273	1.228	0.175	3.046	0.166	0.235	0.369	0.623	0.792	1.589	1.047	0.397	1.973	0.886	0.502749
ENSG00000186297	GABRA5	14.839	4.438	5.217	0.028	0.031	0	0.019	0.065	0.007	0	0	0	0.003	0.058	0.003	0.098	0.155	0.004	0.031	0.013	0.50274
ENSG00000101321	XKR7	1.321	0.905	4.238	0	0	0.011	0.168	0.348	0	0	0.055	0	0.01	0	0	1.785	0.003	0	0.044	0.569	0.502719
ENSG00000075618	FSCN1	163.043	229.257	211.717	193.659	349.614	57.23	10.289	17.596	132.383	36.119	2.232	272.558	28.495	61.103	270.783	5.784	21.04	12.061	31.163	8.515	0.502546
ENSG00000168411	RFWD3	42.795	45.448	7.384	15.492	30.605	19.914	10.717	10.422	22.032	19.006	11.043	32.273	7.737	15.3	17.851	7.898	7.831	2.78	7.506	4.556	0.50239
ENSG00000185630	PBX1	14.348	17.796	18.875	3.63	3.708	8.335	9.737	11.045	0.384	1.026	0.181	0.779	1.856	7.986	1.794	11.129	8.563	5.814	4.629	5.436	0.502264
ENSG00000172247	C1QTNF4	4.481	6.927	37.621	0.69	0.351	40.002	1.129	2.311	0.029	0.904	0.947	0.022	3.018	0.015	6.187	4.826	2.521	0.651	0.978	2.041	0.502193
ENSG00000142453	CARM1	93.935	80.66	78.428	106.637	114.744	20.387	27.559	27.362	29.927	128.093	21.702	55.397	26.192	38.961	62.364	23.111	42.41	26.654	27.714	31.701	0.501515
ENSG00000105409	ATP1A3	29.658	8.294	142.228	0.252	0.184	2.1	0.741	6.368	0.027	0.239	4.908	0.055	0.022	0.022	0.015	2.496	0.265	47.795	0.181	0.337	0.501513
ENSG00000123975	CKS2	177.599	266.824	111.267	99.06	99.926	110.015	49.861	47.397	149.456	129	3.779	208.594	61.976	93.236	175.488	6.298	36.587	15.087	75.885	4.141	0.501432
ENSG00000204764	RANBP17	1.717	1.737	1.305	0.922	0.935	1.12	1.153	1.117	0.225	0.208	0.072	0.306	0.064	1.031	1.468	0.488	0.221	0.167	0.596	1.317	0.501377
ENSG00000133422	MORC2	21.092	23.598	18.995	22.56	15.427	12.598	13.524	13.615	6.189	9.399	9.77	5.67	15.508	6.943	6.694	6.556	12.602	11.208	10.394	23.424	0.501267
ENSG00000117971	CHRNB4	2.989	1.264	1.73	0.004	0	0.009	0.241	2.798	0.075	1.175	0	0.135	0.131	0	0.022	0.183	0.302	0	0	0	0.50107
ENSG00000205664	NA	4.803	4.259	9.404	3.76	2.751	12.599	3.546	4.343	4.485	3.707	2.161	4.257	3.944	0.991	3.544	2.643	3.142	0.674	2.888	5.696	0.501002
ENSG00000197901	SLC22A6	0	0	0.414	0	0	0	0.004	0.003	0	0	0	0	0	0	0	0	0.012	0	0.035	0.022	0.500749
ENSG00000186868	MAPT	0.343	0.442	114.349	0.243	0.361	0.044	0.334	4.597	0.053	0.784	0.185	0.071	0.384	0.074	0.053	9.14	6.558	3.923	0.283	1.331	0.500703
ENSG00000077080	ACTL6B	0.674	0.279	73.56	0	0	0.046	0.241	1.114	0.001	0.018	0.102	0	0.007	0	0	9.873	0.02	0	0.916	1.964	0.500628
ENSG00000125804	FAM182A	0.011	0.039	1.18	0.015	0	0.177	0.032	0.055	0.038	0	0.081	0	0.105	0.001	0.006	0.097	0.138	0.043	0.039	0.07	0.50062
ENSG00000133895	MEN1	35.311	19.953	28.459	27.297	24.45	21.859	11.45	10.872	10.025	30.968	13.239	15.666	13.984	5.802	23.453	15.477	11.383	5.776	11.283	25.307	0.500485
ENSG00000167178	ISLR2	0.644	1.34	13.886	0.039	0.004	0.004	0.456	2.118	0.001	0	0.009	0.003	0.053	0.001	0	0.318	0.59	3.289	0.29	0.341	0.500462
ENSG00000070756	PABPC1	1121.88	510.242	336.167	590.638	421.379	828.788	300.054	295.785	225.513	326.85	743.777	295.188	356.29	261.762	235.217	248.733	369.097	70.109	314.649	130.155	0.500166
ENSG00000101003	GINS1	24.821	31.378	4.129	3.167	12.274	3.257	4.951	4.6	6.446	5.903	0.114	11.741	0.153	6.303	6.377	0.142	3.696	0.297	3.957	0.598	0.500026
ENSG00000221829	FANCG	17.039	18.524	16.278	11.967	22.829	8.292	6.251	6.527	4.472	24.884	4.189	11.685	3.982	4.138	13.431	4.212	6.632	1.157	5.394	13.054	0.500007
ENSG00000198646	NCOA6	2.725	8.359	60.301	20.681	16.917	12.192	10.305	10.714	8.435	10.841	17.528	9.37	12.803	7.788	13.076	20.417	9.688	7.889	7.41	11.275	0.499715
ENSG00000214360	EFCAB9	0.01	0.048	0	0.048	0	0.046	0.033	0.007	0.014	0	0	0	0.013	0.004	0	0	0	0	0	0	0.49968
ENSG00000178394	HTR1A	1.699	2.201	0.357	0	0	0	0.014	0.012	0	0	0	0	0	0.003	0	0.009	0	0	0.036	0.029	0.499624
ENSG00000172365	OR5B2	0	0	0.106	0	0	0	0.003	0.009	0.004	0	0	0	0.018	0.003	0	0	0	0.015	0	0	0.499579
ENSG00000187790	FANCM	2.913	3.312	1.285	0.927	0.838	4.277	1.772	1.496	1.847	0.498	1.551	2.021	0.719	1.42	1.093	0.818	1.199	0.72	0.404	0.637	0.499364
ENSG00000157764	BRAF	5.015	7.502	14.436	9.781	4.908	12.587	10.186	9.583	6.465	3.161	12.448	5.636	12.286	8.17	4.411	10.664	3.656	3.72	4.075	3.118	0.499287
ENSG00000162641	AKNAD1	0.156	0.156	4.331	0.629	0.236	0.351	0.165	0.186	1.014	0.133	0.063	0.339	0.487	0.481	0.376	0.606	0.632	0.203	0.284	0.088	0.499278
ENSG00000101203	COL20A1	0.018	0.046	1.492	0	0	0.005	0.307	1.183	0	0	0.011	0.001	0.007	0.001	0.001	0.004	0.002	0.002	0	0.019	0.498873
ENSG00000128254	C22orf24	0.051	0.167	1.008	0.062	0.082	1.388	0.492	0.465	0.063	0.015	0.583	0.133	0.018	0.061	0.08	0.076	0.021	0.023	0	0.115	0.498717
ENSG00000101871	MID1	18.032	15.87	16.935	6.43	3.844	0.128	5.41	5.376	4.849	13.035	0.033	6.805	16.245	12.421	8.167	2.688	6.012	1.251	2.89	3.957	0.498665
ENSG00000100526	CDKN3	26.812	25.565	10.088	21.18	7.976	2.523	4.069	3.593	9.203	15.629	0.565	16.035	0.8	17.806	11.047	0.197	5.364	1.117	6.506	0.386	0.498557
ENSG00000115241	PPM1G	85.635	76.265	41.616	45.611	69.805	38.195	23.145	25.181	31.844	49.175	34.019	60.629	55.523	30.804	25.391	24.511	31.035	35.26	34.814	29.564	0.49853
ENSG00000186471	AKAP14	0.658	0.142	0.263	0	0	0.004	0.032	0.09	0	0	0.195	0	0.114	0.01	0	0.01	0	0	0	0	0.498496
ENSG00000187556	NANOS3	0.35	0.065	6.129	0.086	0.102	1.314	0.274	0.729	0.021	0.08	0.024	0.031	0.476	0.023	0.763	0.529	0.119	0.271	0	1.053	0.498089
ENSG00000129317	PUS7L	7.012	9.399	3.739	6.806	3.788	12.252	5.51	5.252	6.181	1.076	3.311	4.063	0.954	7.494	1.06	5.848	1.655	1.844	2.937	1.384	0.498062
ENSG00000066735	KIF26A	13.226	23.516	18.467	0.865	1.015	0.075	6.3	6.293	0.081	1.554	0.228	0.023	0.065	0.072	5.014	2.344	3.879	7.476	3.203	8.509	0.498026
ENSG00000096063	SRPK1	36.686	39.44	13.476	12.786	10.63	20.49	19.931	20.236	29.903	5.679	9.356	23.274	23.309	14.366	10.846	9.282	10.593	6.764	12.656	8.742	0.497822
ENSG00000162222	TTC9C	10.527	8.163	11.203	14.554	8.084	10.851	8.304	8.57	6.597	10.3	2.688	5.856	6.782	8.593	6.885	5.466	7.348	5.529	10.328	7.108	0.497599
ENSG00000134121	CHL1	0.101	0.04	26.893	0	0.001	0.022	0.781	5.233	0.014	0.222	0.036	0	0.824	0.021	0	1.534	2.892	0.466	0.583	0.244	0.497575
ENSG00000158691	ZSCAN12	3.456	5.088	3.74	1.641	0.784	6.737	4.494	4.213	2.36	0.427	1.935	1.67	2.129	2.561	1.152	2.448	1.889	1.405	2.147	1.386	0.497524
ENSG00000137868	STRA6	6.256	8.947	0.773	2.343	0.143	0	2.412	5.711	0.01	0.396	0	0.078	2.254	0.008	0	0.211	0.554	0.018	0	0.155	0.49747
ENSG00000110987	BCL7A	3.666	7.263	14.787	4.239	9.469	11.973	4.025	4.469	7.17	7.4	2.983	9.567	6.564	2.631	4.887	5.641	2.379	5.914	2.967	7.523	0.497408
ENSG00000171827	ZNF570	3.092	2.938	5.584	2.065	0.724	6.342	3.086	2.989	1.72	0.658	2.835	0.995	1.48	2.971	0.926	3.504	1.37	2.44	1.603	0.982	0.497348
ENSG00000171094	ALK	0.035	0.204	0.78	0.005	0.003	0.042	0.024	0.707	0.001	0.098	0.069	0	0.019	0.008	0	0.028	0.093	0.009	0	0.051	0.497313
ENSG00000143614	GATAD2B	10.831	9.009	33.381	14.629	15.119	18.701	7.249	8.207	4.668	13.146	28.666	3.544	19.691	3.58	6.492	16.249	6.612	7.535	4.667	7.49	0.496944
ENSG00000138780	GSTCD	6.095	10.39	2.465	2.893	3.315	3.991	3.954	4.359	7.59	1.803	1.332	6.602	1.626	3.603	1.524	2.162	1.634	1.209	2.409	1.038	0.496756
ENSG00000109674	NEIL3	5.42	5.494	4.26	3.713	4.098	0.515	1.883	1.41	3.711	2.674	0.21	8.419	0.006	5.16	3.045	0.038	0.715	0.019	0.785	0.035	0.496708
ENSG00000124207	CSE1L	136.913	200.359	41.011	39.655	28.837	23.112	25.023	26.847	67.092	21.763	16.466	58.205	34.557	39.513	24.304	22.51	21.355	30.829	25.298	12.044	0.496604
ENSG00000100505	TRIM9	0.935	0.908	21.943	0.104	0.023	1.496	0.192	0.696	0.014	0.106	0.123	0.052	1.749	0.035	0.004	4.075	0.144	0.186	1.143	1.037	0.496545
ENSG00000180611	MB21D2	11.175	13.002	6.66	2.812	8.693	0.341	11.483	12.565	7.615	1.321	0.492	4.872	2.556	8.796	6.963	2.296	1.874	2.219	3.695	0.888	0.496524
ENSG00000031691	CENPQ	17.644	17.994	7.505	6.115	5.389	4.054	5.002	5.097	4.186	1.336	0.539	5.878	2.405	7.44	2.673	3.567	3.939	7.217	5.474	2.28	0.496464
ENSG00000112640	PPP2R5D	30.051	36.255	48.17	35.823	49.373	30.478	43.897	37.901	35.568	57.017	23.098	40.503	12.148	26.691	41.742	15.057	24.372	32.25	27.864	21.915	0.496432
ENSG00000177084	POLE	11.336	15.471	7.669	6.451	16.245	10.667	6.996	6.948	3.745	11.514	6.988	8.546	3.331	2.37	7.777	1.24	6.795	2.227	3.282	11.43	0.496384
ENSG00000160202	CRYAA	0	0	0.048	0.013	0.001	0.043	0.024	0.011	0	0	0	0	0.025	0	0	0	0.005	0.009	0	0	0.49628
ENSG00000168702	LRP1B	0.058	0.04	0.844	0.015	0.028	0.007	0.281	0.332	0.004	0.004	0.04	0.016	0.069	0.004	0.008	0.07	0.033	0.01	0.121	0.125	0.496259
ENSG00000186871	ERCC6L	10.954	16.835	1.519	1.726	3.113	0.738	1.742	1.6	2.506	1.252	0.149	5.217	0.55	3.251	0.82	0.018	0.82	0.015	0.962	0.06	0.496108
ENSG00000100427	MLC1	0.066	0.25	55.983	0	0	59.27	0.202	0.322	0.001	0.006	7.711	0.031	0.002	0.004	0.001	0.017	0.069	0.037	0	0.049	0.49601
ENSG00000164871	SPAG11B	0.006	0	0.023	0	0	0	0	0	0	0	0	0	0	0	0	0	0.004	0	0	0.004	0.495882
ENSG00000197177	GPR123	0.053	0.106	13.17	0	0	0	0.102	0.186	0	0	0	0	0	0	0	2.18	0.018	0.012	0.02	0.214	0.495853
ENSG00000160999	SH2B2	4.133	4.313	18.958	1.871	1.828	1.446	0.703	0.721	0.241	7.841	8.028	1.047	1.69	0.181	0.542	1.63	1.984	0.96	2.672	5.822	0.495814
ENSG00000163156	SCNM1	10.278	9.523	21.172	12.387	8.884	12.152	5.398	6.064	5.649	14.8	11.308	7.31	8.74	5.703	3.568	6.561	10.324	8.116	11.423	8.943	0.495764
ENSG00000179915	NRXN1	3.006	1.047	21.32	0	0.001	0.008	0.357	1.687	0.002	0	0.003	0.002	0.007	0.001	0.001	5.987	0.522	0.228	0.166	0.503	0.495704
ENSG00000160131	VMA21	30.679	24.552	16.279	14.76	18.192	19.092	11.696	11.267	22.48	11.52	9.031	19.921	12.116	25.333	12.544	20.771	5.293	8.667	8.615	5.389	0.495582
ENSG00000148400	NOTCH1	26.682	17.43	81.367	10.13	15.695	20.668	7.67	8.334	8.188	9.398	38.326	18.885	13.509	1.677	28.618	7.455	20.164	9.694	3.584	27.718	0.495462
ENSG00000196504	PRPF40A	51.73	45.897	14.473	14.019	7.629	36.471	21.765	22.041	24.598	2.505	24.745	19.589	22.261	22.751	11.08	12.172	10.375	8.247	12.828	9.083	0.495317
ENSG00000164742	ADCY1	6.118	5.139	12.508	0.196	0.149	0.017	0.56	0.787	0.205	3.331	0.02	1.024	0.4	0.088	0.083	6.949	0.424	0.634	0.518	1.386	0.495307
ENSG00000139970	RTN1	0.769	0.883	197.415	0.327	0.488	0.508	1.315	7.654	0.01	0.012	8.569	0.018	2.002	0.175	0.04	33.813	0.774	0.13	0.8	2.692	0.495289
ENSG00000203740	METTL11B	0.144	0.571	1.851	0	0	0	0	0.005	0	0	0	0	0	0	0	0	0	0.824	0	0.013	0.495104
ENSG00000178217	SH2D4B	0.027	0.049	0.134	0	0.003	0.043	0.014	0.011	0.115	0.016	0.103	0.013	0.051	0.001	0	0.017	0.024	0.008	0	0.011	0.495042
ENSG00000134313	KIDINS220	15.582	11.456	53.216	13.537	5.024	22.867	16.031	19.683	15.33	3.887	14.927	11.864	14.857	26.067	10.881	18.469	12.567	18.402	3.993	7.329	0.494779
ENSG00000169410	PTPN9	21.63	25.647	25.667	36.608	28.555	19.49	25.814	26.144	34.586	34.893	18.605	34.468	8.136	32.217	26.438	14.057	9.893	5.358	20.543	5.799	0.494772
ENSG00000198883	PNMA5	0.066	0.078	0.395	0.003	0	0.142	0.267	0.34	0	0.007	0.355	0	0	0	0	0	0.022	0.005	0	0.061	0.494666
ENSG00000121005	CRISPLD1	22.622	18.746	3.771	0.015	0.041	10.555	4.505	6.744	0.1	0.859	0.053	0.933	9.905	0.169	2.738	0.455	1.584	0.203	0.213	0.092	0.494637
ENSG00000204130	RUFY2	2.405	2.673	14.205	2.787	1.851	9.405	6.526	8.307	5.371	0.554	5.592	2.88	2.301	5.931	2.494	3.409	3.34	1.486	3.676	3.332	0.494581
ENSG00000138083	SIX3	0.092	0.156	29.458	0.009	0	0	0.003	0	0	0	0	0	0.125	0	0	2.517	0.003	0.006	0	2.986	0.494503
ENSG00000213516	RBMXL1	14.335	18.062	14.005	8.925	6.853	26.867	10.369	10.854	8.285	6.241	14.008	9.636	15.621	10.26	5.578	9.577	7.021	9.068	8.781	3.749	0.494482
ENSG00000134717	BTF3L4	24.863	24.515	19.379	14.373	6.892	16.193	6.505	7.266	11.573	5.308	8.254	8.493	12.637	16.721	8.596	12.738	8.54	9.146	16.454	7.762	0.494471
ENSG00000198799	LRIG2	12.084	5.835	6.288	4.563	1.901	5.991	6.359	6.278	6.443	1.529	8.101	3.196	3.72	5.022	5.561	3.799	2.957	3.886	1.318	3.274	0.494467
ENSG00000175305	CCNE2	2.006	2.877	7.478	0.606	5.321	6.63	2.898	3.303	1.256	1.509	1.521	6.331	1.011	5.276	2.137	0.437	2.032	0.28	2.139	1.172	0.494397
ENSG00000118707	TGIF2	32.165	26.506	11.992	4.463	4.728	25.595	27.168	23.604	6.553	11.012	13.383	7.684	15.298	5.465	16.848	4.836	3.601	3.727	6.319	9.043	0.494274
ENSG00000169313	P2RY12	0	0	6.362	0	0	1.099	1.424	1.402	0	0.027	0.622	0	0	0.27	0	0.5	0.765	0.298	0.625	0.24	0.494149
ENSG00000168246	UBTD2	19.418	36.887	28.69	11.981	10.817	9.01	26.527	29.213	12.268	9.811	1.8	9.288	11.06	20.497	9.498	8.895	10.559	8.765	25.024	10.124	0.493994
ENSG00000167619	TMEM145	6.529	1.306	48.364	0.207	0.564	0.047	0.507	1.703	0	2.432	0	0.043	0.175	0.039	0.054	9.589	0.213	0.189	1.282	5.499	0.493915
ENSG00000196081	ZNF724P	31.682	21.563	4.145	1.068	2.201	2.801	2.064	1.742	1.851	0.546	0.974	2.551	1.869	1.881	0.368	0.407	0.937	0.301	0.165	0.39	0.493445
ENSG00000077152	UBE2T	68.89	70.984	47.462	22.184	52.146	6.277	7.057	8.761	34.519	30.152	0.792	59.228	2.727	33.603	57.055	3.028	7.23	19.964	12.284	0.934	0.49339
ENSG00000204435	CSNK2B	39.731	35.689	110.106	66.599	97.356	39.205	26.604	27.884	12.066	90.769	56.474	21.109	53.249	13.812	36.76	42.958	29.893	27.324	38.357	32.153	0.493272
ENSG00000101057	MYBL2	119.141	107.261	51.872	22.414	87.44	5.854	8.323	8.682	3.476	121.366	2.721	13.637	0.104	4.259	36.488	1.953	7.147	0.148	13.958	28.321	0.492542
ENSG00000116641	DOCK7	4.294	10.385	20.595	13.631	5.199	8.028	7.134	7.51	15.826	6.272	1.109	11.932	8.392	23.207	3.338	5.322	3.053	1.767	4.648	1.734	0.492439
ENSG00000171532	NEUROD2	0.023	0	2.352	0	0	0.006	0.017	0.018	0.003	0	0.072	0.005	0.012	0	0.004	0.021	0.013	0	0.381	0.043	0.492436
ENSG00000020256	ZFP64	4.589	7.926	8.395	6.215	5.972	3.165	3.356	2.907	8.211	6.102	1.548	6.13	1.478	3.832	10.407	3.616	2.209	1.701	2.477	2.039	0.49228
ENSG00000101144	BMP7	4.636	6.504	20.224	0.071	0	0	1.315	1.38	0.147	0	0	0.008	2.444	0.002	0	0.056	10.007	1.814	0.429	0.079	0.492199
ENSG00000136485	DCAF7	27.923	35.155	60.578	20.95	23.375	32.663	56.573	48.967	23.197	53.557	13.436	36.633	15.816	25.486	43.126	26.813	16.589	21.014	21.15	11.147	0.49199
ENSG00000164649	CDCA7L	51.726	41.418	17.433	17.43	15.275	40.046	4.153	5.267	13.371	13.203	4.403	15.984	3.77	14.675	31.131	3.265	3.768	8.056	14.985	6.121	0.491851
ENSG00000123213	NLN	36.489	26.562	5.7	7.51	4.632	4.177	2.806	3.032	6.575	3.25	1.204	6.689	2.492	7.846	3.323	2.257	1.975	1.926	3.668	1.842	0.491587
ENSG00000132563	REEP2	14.684	14.765	56.407	4.23	6.76	1.021	5.142	12.957	0.117	9.094	0.113	2.088	0.333	3.226	2.251	26.705	4.902	1.616	1.533	10.975	0.49129
ENSG00000128050	PAICS	214.54	237.635	59.226	61.035	51.061	66.028	40.569	37.84	100.882	38.409	5.426	118.879	44.069	79.072	66.386	29.163	46.517	28.607	28.544	22.52	0.491072
ENSG00000145736	GTF2H2	2.152	4.177	0.911	0.931	0.519	2.151	2.77	3.025	1.331	0.461	0.414	0.464	0.588	0.906	0.281	0.647	0.537	0.872	0.677	0.912	0.491017
ENSG00000116852	KIF21B	6.294	7.73	56.399	0.029	0.016	3.3	0.637	0.791	0.129	0.554	45.949	0.089	0.237	0.034	1.493	0.594	0.694	0.203	0.882	1.036	0.49101
ENSG00000102977	ACD	20.089	20.66	46.623	30.824	47.72	14.679	13.841	12.03	8.137	47.435	11.862	20.83	25.193	4.897	23.82	20.297	11.344	7.226	11.374	16.704	0.490977
ENSG00000101856	PGRMC1	279.269	223.207	88.22	70.753	64.796	48.504	194.114	178.87	52.357	38.066	18.273	63.082	80.262	102.65	40.636	74.248	74.334	22.088	53.322	35.779	0.490845
ENSG00000196584	XRCC2	32.184	12.603	4.942	1.973	4.31	4.651	3.705	3.686	1.712	0.825	0.402	3.187	0.107	1.73	1.766	0.23	1.652	0.167	0.665	0.173	0.490825
ENSG00000111596	CNOT2	10.764	10.162	9.913	6.746	3.302	14.25	9.045	8.921	7.798	3.346	11.095	5.699	11.728	8.214	4.783	7.157	4.953	3.517	6.354	4.807	0.490432
ENSG00000122512	PMS2	3.905	5.468	4.467	7.154	2.205	8.103	3.793	4.391	6.33	3.528	5.478	5.289	3.071	3.95	3.263	3.691	3.006	1.87	3.247	2.164	0.490363
ENSG00000111215	PRR4	0.994	1.32	9.696	2.572	1.404	4.701	2.313	2.465	1.468	1.454	3.298	1.555	2.994	1.167	1.613	3.182	1.411	1.368	1.603	2.485	0.490342
ENSG00000137968	SLC44A5	1.84	2.377	4.224	0.009	0	2.614	0.48	1.667	0.332	0.004	0	0	0.11	0.012	2.117	1.765	0.542	0.664	0.113	0.91	0.490339
ENSG00000205217	FAM106B	0.16	0.003	2.331	0.176	0.068	0.664	0.238	0.302	0.513	0.047	0.731	0.031	0.419	0.094	0.894	0.064	0.095	0.106	0	0.303	0.490035
ENSG00000175832	ETV4	80.907	63.479	1.601	63.408	48.546	0.016	8.298	10.568	25.484	47.458	0.391	27.702	4.086	1.718	5.003	2.669	2.7	0.917	2.003	12.981	0.490013
ENSG00000077616	NAALAD2	1.859	2.208	0.879	0.066	0.042	0.816	1.677	1.603	0.001	0.028	0.47	0	0.005	0.386	0.28	0.204	0.493	0.201	0.214	0.635	0.489835
ENSG00000060339	CCAR1	62.816	36.312	28.456	23.806	10.951	40.781	26.252	27.403	25.635	2.466	25.266	19.717	20.053	23.738	17.217	17.558	17.747	13.938	20.077	22.572	0.489794
ENSG00000168612	ZSWIM1	9.849	8.287	9.546	8.753	12.136	8.367	11.899	11.737	3.539	15.848	7.009	4.498	5.121	2.748	7.998	7.117	4.125	5.18	5.748	4.28	0.489697
ENSG00000151835	SACS	13.155	18.704	12.76	14.539	11.066	7.756	1.449	2.809	6.866	1.593	4.148	5.088	3.325	26.799	6.596	1.653	3.359	6.52	1.016	1.535	0.489658
ENSG00000128594	LRRC4	3.961	10.848	14.422	0.142	0.216	0.475	1.057	1.416	0.048	0.93	4.155	0.155	0.828	0.448	4.593	3.63	1.616	1.326	5.196	1.083	0.489576
ENSG00000186193	C9orf140	29.727	14.911	9.593	13.721	3.8	1.706	9.056	8.631	1.242	12.556	1.522	4.265	0.682	1.505	13.432	0.4	6.046	0.182	6.308	0.426	0.489385
ENSG00000165490	C11orf82	9.924	13.139	1.682	2.787	3.131	1.04	0.847	1.026	3.135	1.436	0.372	6.52	0.873	3.142	1.816	0.116	0.625	0.22	1.342	0.108	0.489359
ENSG00000143013	LMO4	50.182	30.925	82.948	31.528	9.122	20.71	19.855	25.747	9.633	16.833	8.364	10.789	16.706	23.137	10.314	4.547	27.103	16.329	56.837	16.969	0.489318
ENSG00000065600	TMEM206	11.846	6.542	14.859	3.374	2.508	18.606	1.822	2.26	7.63	6.622	5.172	6.542	4.065	4.137	12.896	2.42	3.249	2.907	1.933	2.456	0.489303
ENSG00000220161	NA	5.354	1.012	1.514	0.346	0.209	0.622	0.576	0.82	0.107	0.264	0.072	0.044	0.238	0.076	0.205	0.06	0.299	0.03	0.034	0.042	0.489199
ENSG00000137337	MDC1	19.957	21.653	15.582	15.268	24.13	15.106	6.373	7.347	3.502	12.632	12.147	5.397	9.424	2.695	7.75	19.613	6.823	5.963	3.173	14.428	0.488952
ENSG00000109881	CCDC34	16.084	9.675	5.946	4.056	3.276	5.275	9.754	8.873	1.422	1.633	0.244	3.091	1.655	2.064	1.213	2.465	3.232	1.1	6.165	4.039	0.488914
ENSG00000139734	DIAPH3	10.114	12.109	3.604	9.193	8.896	0.973	2.074	2.599	4.34	2.206	0.123	7.245	0.078	9.974	5.397	0.088	0.664	0.026	4.067	0.286	0.488702
ENSG00000138439	FAM117B	8.398	11.383	15.177	0.794	0.339	4.748	10.088	8.041	1.285	1.823	15.57	1.011	0.727	0.51	1.287	7.159	4.127	0.789	3.516	3.69	0.48866
ENSG00000144218	AFF3	0.464	2.744	13.51	0.465	0.034	7.023	1.225	1.599	0	0.982	6.062	0.008	2.297	0.429	0.036	0.316	4.444	0.831	2.005	0.174	0.4885
ENSG00000161547	SRSF2	193.064	221.897	105.012	95.338	162.879	215.498	97.502	110.917	103.39	144.455	175.126	110.709	208.028	101.722	151.206	83.987	85.19	40.829	85.665	72.072	0.48833
ENSG00000176903	PNMA1	26.768	39.823	90.275	34.306	36.013	29.864	8.028	22.869	9.831	27.777	12.816	17.675	18.724	35.384	29.347	42.988	40.066	18.881	23.245	9.515	0.48823
ENSG00000196218	RYR1	2.685	2.772	1.521	0.027	0.009	0.14	0.681	0.613	0.09	0.342	0.528	0.074	1.815	0.006	0.005	0.13	0.855	0.254	0.124	0.563	0.488134
ENSG00000184985	SORCS2	0.676	0.886	8.781	0.025	0.161	0.007	1.882	2.001	0.092	1.728	0.628	0.772	1.043	0.212	0.005	0.326	2.381	0.383	0.749	0.359	0.488084
ENSG00000187068	C3orf70	0.799	1.909	19.744	1.062	2.179	0.071	3.597	7.096	0.003	4.482	0.023	0.02	0.012	2.515	0.083	0.839	5.738	0.709	2.056	0.569	0.488078
ENSG00000256771	ZNF253	34.658	17.483	17.576	1.325	0.723	6.085	11.653	10.252	2.296	0.292	3.222	1.043	2.265	2.58	0.931	11.279	2.59	4.244	6.625	4.183	0.488057
ENSG00000125484	GTF3C4	15.663	27.432	6.684	6.572	7.164	8.261	9.674	9.501	6.597	6.38	5.036	5.984	14.348	5.626	3.488	9.546	4.561	5.388	4.533	2.951	0.488051
ENSG00000155827	RNF20	18.76	24.389	24.041	15.014	8.128	23.242	18.495	18.124	14.366	2.036	10.177	10.438	9.866	13.521	4.76	15.246	15.891	15.718	16.025	9.692	0.487767
ENSG00000183921	SDR42E2	0.137	0.066	0.165	0.025	0	0.117	0.19	0.183	0	0	0.209	0	0.03	0	0	0	0	0	0	0.097	0.487691
ENSG00000160117	ANKLE1	3.688	2.326	1.985	0.834	0.901	6.221	0.444	0.728	0.347	2.07	1.939	0.215	0.727	0.168	1.807	0.206	0.495	0.164	0.148	0.439	0.487588
ENSG00000135052	GOLM1	60.253	43.875	85.094	16.203	17.084	5.971	86.209	58.029	10.421	19.275	13.714	16.253	4.281	27.675	34.854	28.878	6.795	3.998	38.378	31.023	0.48748
ENSG00000197093	GAL3ST4	6.847	2.639	24.177	3.807	4.961	1.602	2.166	2.08	1.306	10.915	5.471	4.246	0.9	6.723	11.476	0.961	5.032	0.79	2.37	0.811	0.487444
ENSG00000168495	POLR3D	22.307	22.257	14.442	19.689	14.74	22.015	11.351	12.335	13.258	19.486	11.301	15.863	17.931	15.613	17.552	10.295	7.397	18.034	10.926	10.09	0.487267
ENSG00000135336	ORC3	29.478	35.889	15.539	11.548	6.669	12.368	13.882	11.691	18.007	3.341	6.785	16.601	11.392	20.603	6.26	13.471	7.781	10.432	9.192	7.263	0.487215
ENSG00000100122	CRYBB1	5.544	2.495	2.268	0.011	0	0.383	0.151	0.45	0	0	0.37	0	0	0.022	0.007	0.138	0.38	0.353	0.937	0.333	0.487215
ENSG00000164045	CDC25A	22.129	35.322	2.842	2.288	11.634	3.507	3.087	2.96	3.192	7.06	0.132	11.137	0.269	2.554	4.247	0.326	1.36	0.377	3.473	0.602	0.487161
ENSG00000007968	E2F2	2.493	2.81	7.057	0.626	4.522	0.65	1.766	1.773	0.081	6.692	3.679	0.481	0.008	0.445	0.985	0.059	4.036	0.058	1.391	0.067	0.487118
ENSG00000060688	SNRNP40	22.904	29.703	10.17	18.816	23.804	12.57	10.2	10.609	18.881	11.448	8.184	21.416	19.167	17.108	21.36	8.515	5.371	4.908	9.867	4.402	0.487109
ENSG00000133665	DYDC2	1.754	1.992	0.468	0	0	0.006	0.131	0.105	0.001	0.021	0	0.02	0.008	0.008	0	0.096	0.131	0.013	0.21	0.081	0.487095
ENSG00000178921	PFAS	35.425	41.728	8.576	22.046	35.86	12.579	8.953	9.733	6.514	23.091	4.994	8.511	5.568	7.844	19.486	3.797	8.847	6.364	5.966	15.667	0.487071
ENSG00000078246	TULP3	19.437	17.451	61.934	61.639	56.622	5.431	6.781	7.845	13.895	33.224	4.516	16.686	27.234	35.914	29.902	15.214	18.105	4.181	11.687	10.285	0.486963
ENSG00000079102	RUNX1T1	7.248	2.584	7.461	5.986	3.992	0.035	0.782	1.397	0.002	0.022	0.003	0.001	0.049	2.42	3.113	3.724	1.311	2.968	0.925	0.858	0.486935
ENSG00000111581	NUP107	23.455	36.942	8.564	7.946	4.795	16.862	11.254	11.962	16.717	3.566	8.95	15.236	12.496	13.782	8.034	4.451	7.416	6.124	5.929	6.81	0.4868
ENSG00000147180	ZNF711	8.506	9.943	41.111	0.498	0.169	66.319	19.877	24.707	1.599	0.035	1.009	0.022	5.434	0.303	1.626	3.413	3.605	0.959	1.287	3.69	0.486645
ENSG00000198093	ZNF649	30.665	27.842	7.832	2.125	1.583	6.778	7.52	7.253	5.014	1.117	3.702	3.929	7.645	3.069	1.945	4.023	4.786	4.19	4.422	2.515	0.486564
ENSG00000166508	MCM7	110.982	113.859	49.618	47.641	143.784	69.049	32.378	33.382	23.663	87.702	21.619	81.99	30.769	35.403	74.434	8.551	28.386	12.423	30.371	49.222	0.48652
ENSG00000135486	HNRNPA1	243.841	208.513	145.464	81.921	51.991	362.485	110.561	125.357	60.585	28.871	104.461	102.107	81.28	90.423	50.842	65.676	80.71	57.007	105.53	64.081	0.486505
ENSG00000151322	NPAS3	0.114	0.702	10.701	0.051	0.017	0.07	0.228	0.405	0.008	0.01	0	0.005	0.26	0.022	0.062	2.064	0.245	0.097	0.696	0.265	0.486336
ENSG00000149485	FADS1	67.478	50.918	29.699	51.768	55.818	22.643	1.111	2.812	9.962	29.381	3.64	23.791	2.251	46.825	42.702	7.222	3.974	26.827	4.919	3.274	0.486177
ENSG00000176956	LY6H	0.153	0.326	50.76	0	0	0.045	2.441	6.149	0	0.013	0	0	0.01	0	0.003	4.566	0.182	0.034	6.418	2.288	0.486089
ENSG00000198791	CNOT7	28.247	32.839	18.155	16.487	10.441	34.771	20.264	17.876	24.277	9.664	17.519	21.619	13.671	21.38	11.47	21.995	7.31	11.424	17.995	7.115	0.485993
ENSG00000152926	ZNF117	7.12	6.118	19.373	0.758	0.649	14.27	9.312	14.306	1.231	0.102	4.23	0.569	2.366	1.678	8.68	4.147	6.682	1.459	2.046	2.945	0.485971
ENSG00000188706	ZDHHC9	30.089	14.78	24.434	27.135	29.577	11.273	30.868	28.518	18.323	21.583	1.563	21.726	12.604	17.627	18.358	19.881	9.498	15.312	12.058	6.312	0.485945
ENSG00000164600	NEUROD6	0	0	1.32	0	0	0	0.221	1.057	0	0	0	0	0	0	0	0	0	0	0	0	0.485917
ENSG00000184939	ZFP90	6.932	9.778	20.595	10.812	3.602	26.438	7.347	8.949	10.666	3.521	13.376	9.273	5.046	10.608	7.409	8.929	6.352	2.342	7.015	6.838	0.485689
ENSG00000146267	C6orf168	7.236	5.799	17.369	0.663	2.08	0	0.424	1.61	3.032	6.232	0	5.476	2.135	1.151	1.59	4.92	5.893	0.129	1.754	1.946	0.485662
ENSG00000131374	TBC1D5	5.471	8.522	13.776	15.642	10.558	20.144	10.297	9.841	9.857	6.993	13.982	9.312	1.719	13.994	9.75	9.365	4.824	5.07	5.984	2.595	0.485558
ENSG00000166532	RIMKLB	22.941	14.168	21.882	2.693	2.126	34.755	6.158	14.225	9.389	2.89	2.355	3.75	4.776	4.466	9.76	4.898	5.792	2.902	8.713	8.99	0.485462
ENSG00000122952	ZWINT	27.366	53.649	24.534	22.422	44.676	9.683	18.024	16.329	16.654	36.968	1.747	47.541	0.337	24.55	25.845	1.452	8.316	0.668	20.087	3.496	0.485372
ENSG00000164604	GPR85	0.102	0.226	2.869	1.157	0.465	0.105	0.137	0.878	0.807	1.118	0.021	0.088	0.024	1.638	0.175	0.073	0.37	0.438	0.263	0.097	0.485295
ENSG00000182134	TDRKH	7.129	9.144	5.536	1.055	0.608	2.69	1.296	1.417	4.663	0.703	1.587	3.802	0.644	0.829	2.091	3.622	1.033	2.601	2.135	1.766	0.485091
ENSG00000129534	MIS18BP1	31.642	26.57	6.918	4.795	4.035	39.3	9.477	9.314	4.504	1.187	13.51	4.926	2.334	5.177	2.667	7.096	3.077	1.608	3.826	2.061	0.485078
ENSG00000182698	RESP18	0.011	0.067	0.31	0	0	0	0.068	0.188	0	0	0	0	0.001	0	0	0.07	0.008	0	0	0.063	0.485062
ENSG00000119335	SET	485.962	464.342	77.702	84.23	73.575	163.788	80.903	84.11	101.243	44.072	56.635	88.401	72.326	89.517	33.385	55.189	59.097	74.37	92.126	43.467	0.485025
ENSG00000115239	ASB3	4.008	4.908	11.068	3.076	1.62	6.89	2.6	2.608	4.137	2.104	4.316	3.629	5.259	5.037	5.859	4.368	3.245	1.877	2.684	3.238	0.484572
ENSG00000196724	ZNF418	4.008	3.704	6.621	1.018	0.785	7.593	4.708	5.364	1.582	0.262	0.917	0.668	1.223	1.03	0.77	1.944	2.249	2.511	0.904	3.475	0.484496
ENSG00000143376	SNX27	17.814	14.588	18.294	7.92	8.554	7.441	11.098	11.139	11.744	7.117	12.137	10.908	5.145	15.38	7.311	11.006	8.659	11.872	9.663	7.959	0.484288
ENSG00000182004	SNRPE	101.822	76.089	49.567	26.693	37.243	58.314	24.142	25.702	48.759	23.647	16.39	49.353	52.295	41.687	32.597	21.22	20.256	30.142	52.683	15.398	0.484229
ENSG00000144792	ZNF660	3.419	4.967	2.66	0.18	0.101	7.3	2.619	2.839	0.024	0.064	0.443	0.019	0.348	0.45	0.425	1.313	0.719	0.35	0.692	1.158	0.48422
ENSG00000172534	HCFC1	35.042	43.197	58.398	57.587	114.705	21.714	17.766	17.693	2.548	66.47	44.431	6.9	23.288	2.59	12.116	33.911	16.712	14.066	13.492	22.112	0.484179
ENSG00000196220	SRGAP3	0.653	1.832	8.097	0.07	0.047	0.657	0.501	1.427	1.395	0.127	0.44	2.666	0.508	0.049	0.009	2.087	1.029	0.64	0.311	0.708	0.483889
ENSG00000162415	ZSWIM5	0.737	3.017	27.908	0.214	0.327	1.252	5.488	6.2	0.029	0.444	1.833	0.023	0.853	0.627	4.417	6.928	1.722	0.242	1.239	1.616	0.483881
ENSG00000080802	CNOT4	8.475	6.585	16.678	7.681	6.732	7.817	6.903	6.805	4.625	4.846	6.755	4.846	13.974	5.424	4.708	12.348	4.654	4.043	3.496	4.569	0.483814
ENSG00000004848	ARX	0.033	0.016	129.787	0.004	0	0	0.975	1.235	0.001	0	0	0	0.048	0	0.004	22.09	0.005	0	1.571	4.012	0.48377
ENSG00000146410	FAM54A	5.468	5.738	2.109	3.858	3.668	1.503	0.822	0.891	4.3	3.12	0.637	5.244	2.473	3.524	2.916	0.491	0.876	0.089	1.799	0.453	0.483757
ENSG00000064703	DDX20	9.246	13.614	4.278	4.598	3.854	9.554	5.751	6.12	7.86	3.337	8.077	5.512	7.128	7.906	2.814	4.58	3.574	3.67	3.711	3.125	0.483636
ENSG00000157349	DDX19B	19.284	19.523	20.374	25.352	20.206	18.538	12.548	11.446	13.839	13.458	28.554	15.985	17.154	18.385	14.21	15.502	11.53	9.814	17.176	14.209	0.483606
ENSG00000143498	TAF1A	3.062	5.655	5.464	2.74	0.895	4.758	4.146	4.224	2.613	0.622	1.81	2.063	8.93	2.567	0.514	2.45	1.163	0.893	1.655	1.422	0.483591
ENSG00000132535	DLG4	7.346	9.065	43.118	9.497	9.874	12.562	3.017	5.325	2.467	5.956	7.543	1.405	3.262	3.647	8.256	15.394	6.348	3.602	7.521	13.14	0.48355
ENSG00000078898	BPIFB2	0.003	0.008	0.245	0	0	0	0	0.01	0	0	0	0	0.027	0.006	0	0	0.055	0	0	0	0.483536
ENSG00000047410	TPR	28.977	38.007	21.581	19.615	12.975	47.124	29.263	29.607	20.06	2.194	29.179	16.295	27.627	21.583	13.994	18.096	16.414	13.496	10.72	13.571	0.483267
ENSG00000170037	CNTROB	10.508	12.338	44.469	20.261	20.747	26.236	10.391	11.666	10.734	17.407	9.917	12.657	15.84	8.23	18.037	8.406	16.561	7.151	12.43	24.905	0.483231
ENSG00000164684	ZNF704	0.956	2.044	56.27	0.102	0.099	3.278	11.968	11.579	0.416	6.748	0.097	0.055	0.649	0.017	2.819	5.279	2.786	5.045	2.722	7.506	0.483113
ENSG00000065150	IPO5	73.296	109.995	37.265	54.535	25.616	47.929	30.497	31.133	46.9	16.448	15.091	44.099	37.055	53.962	22.891	26.835	16.276	51.338	23.904	27.147	0.483108
ENSG00000118492	C6orf103	0.004	0.009	0.017	0.003	0	0.018	0.003	0.004	0	0.003	0.018	0	0.009	0.001	0	0.008	0.002	0	0	0	0.483082
ENSG00000169554	ZEB2	0.006	5.765	71.49	12.069	7.042	31.868	6.691	7.135	0.009	11.162	23.826	0.034	0.722	23.083	4.572	2.125	7.546	7.602	19.868	2.601	0.483077
ENSG00000178409	BEND3	14.845	16.406	2.777	1.221	2.503	0.612	3.53	3.054	2.847	3.049	0.958	5.441	1.6	1.442	1.495	1.726	0.879	0.803	1.617	1.495	0.482977
ENSG00000157837	NA	17.54	11.749	15.603	13.946	10.224	7.393	14.973	13.554	8.941	18.596	12.059	6.935	9.904	8.06	8.842	14.314	12.826	6.238	5.103	7.472	0.482959
ENSG00000176124	DLEU1	1.465	1.722	1.851	1.218	0.543	1.519	1.311	1.115	0.646	0.537	0.44	1.193	0.27	0.719	0.421	1.325	0.935	1.532	0.716	0.562	0.482918
ENSG00000183684	THOC4	51.371	97.397	30.768	40.704	99.626	42.655	20.319	23.242	39.085	55.932	30.622	44.891	45.254	29.139	56.753	14.731	18.037	20.491	31.148	14.16	0.482816
ENSG00000133226	SRRM1	105.588	39.025	43.867	32.355	53.635	33.566	24.039	26.759	15.253	12.917	51.981	17.24	54.826	15.477	9.615	43.16	17.884	10.723	12.898	21.966	0.482754
ENSG00000148297	MED22	15.368	16.977	7.995	14.446	12.072	9.239	6.593	6.835	6.656	10.332	7.954	9.016	7.794	5.31	12.597	5.894	8.872	7.181	7.6	7.134	0.482737
ENSG00000159055	MIS18A	55.163	41.287	8.3	9.585	12.752	11.603	9.502	9.32	8.774	7.441	1.855	13.3	4.672	8.093	6.436	2.554	8.162	2.242	12.429	3.817	0.482655
ENSG00000177932	ZNF354C	3.232	3.273	5.519	3.041	1.161	9.053	3.807	4.42	2.303	0.49	2.352	1.683	2.696	3.621	1.661	1.957	2.404	1.837	1.909	1.888	0.482594
ENSG00000143603	KCNN3	1.753	1.828	5.212	0.006	0.01	0.015	0.866	2.571	0.023	0.869	0.105	0.014	0.205	0	0.634	2.401	0.531	0.496	0.234	0.497	0.482588
ENSG00000132434	LANCL2	3.15	8.472	9.545	9.637	7.845	6.363	9.669	9.938	5.529	4.716	5.464	6.313	6.327	7.378	7.068	8.361	4.394	3.265	5.082	4.91	0.482536
ENSG00000085872	CHERP	28.387	29.416	40.422	25.112	42.265	10.76	17.396	17.037	3.068	39.712	17.927	6.594	33.913	2.144	6.606	20.705	16.374	9.765	12.228	25.708	0.482387
ENSG00000138430	OLA1	22.684	31.992	27.757	17.026	9.715	34.259	16.12	16.899	25.17	5.294	6.469	18.891	16.026	14.137	6.443	15.655	11.708	16.687	23.099	13.58	0.481999
ENSG00000244462	RBM12	39.349	57.423	18.307	17.739	17.481	30.23	26.714	27.777	29.911	14.489	25.02	26.871	21.551	32.043	29.874	16.5	14.8	16.245	14.429	10.356	0.481968
ENSG00000078043	PIAS2	20.423	18.691	9.243	8.144	6.94	15.22	7.368	7.616	8.3	6.509	8.911	12.417	6.279	13.046	6.276	10.312	4.42	5.837	9.213	4.045	0.481403
ENSG00000135472	FAIM2	0.09	0.262	16.253	1.338	1.569	0	0.796	2.726	0.003	0.121	0.041	0	0.041	0.8	0.02	0.929	1.852	2.507	0.778	0.866	0.481356
ENSG00000124613	ZNF391	8.866	4.996	2.497	2.133	0.222	6.128	1.887	1.844	2.92	0.191	0.281	1.452	0.858	0.391	0.145	3.208	1.082	0.407	1.041	1.043	0.481338
ENSG00000100433	KCNK10	0.45	0.9	2.957	0	0	0	1.747	2.251	0.659	0	0.19	0.003	0	0	0	0.705	0.464	0.02	0.102	0.707	0.481335
ENSG00000148730	EIF4EBP2	90.249	83.659	52.83	19.498	38.06	33.435	55.252	44.408	17.134	50.094	42.647	26.573	21.844	35.1	18.635	30.409	33.589	34.783	53.902	22.651	0.481144
ENSG00000163026	C2orf44	13.772	16.442	6.484	5.27	3.869	3.365	4.026	4.471	9.263	2.985	1.2	9.717	3.876	8.582	7.621	2.605	2.834	3.693	3.205	1.572	0.480951
ENSG00000109758	HGFAC	0.044	0.163	8.214	0.03	0.018	0.011	0.126	0.448	0	0.013	0.054	0.009	0.847	0.004	0.233	0.034	0.331	0.31	0.373	1.016	0.48091
ENSG00000044524	EPHA3	0.138	3.686	20.156	0.078	0.055	0	1.737	1.74	0.154	0.008	0	0.023	0.074	0.093	0	3.437	4.538	1.076	0.503	0.411	0.480886
ENSG00000165588	OTX2	6.402	38.297	7.133	0	0	0	0.003	0	0	0	0	0.006	0.004	0.01	0.009	0.005	0	0	0	0	0.480863
ENSG00000187109	NAP1L1	263.596	163.531	82.927	66.493	43.643	242.222	38.079	45.125	44.441	35.754	74.024	33.413	108.989	86.255	17.154	37.805	38.487	44.056	65.952	28.448	0.480857
ENSG00000145907	G3BP1	49.247	59.382	9.217	19.076	17.161	26.827	29.04	26.613	33.937	15.808	16.116	23.278	34.637	21.088	12.98	13.798	10.428	11.141	16.18	7.185	0.48041
ENSG00000176635	HORMAD2	0.03	0	0.094	0.004	0.006	0	0.007	0.003	0	0	0.007	0.004	0.067	0.004	0	0.006	0	0	0	0.003	0.480287
ENSG00000162873	KLHDC8A	2.795	2.307	88.021	0	0.003	0.011	0.539	4.45	0	0.018	0.006	0.008	0.082	0	0	13.571	4.997	0.028	6.674	1.693	0.480244
ENSG00000085185	BCORL1	1.244	3.541	13.243	5.558	5.198	5.896	9.668	7.444	0.518	8.562	2.841	0.818	5.883	0.66	1.517	3.721	3.376	3.629	2.756	4.418	0.480242
ENSG00000122483	CCDC18	10.817	5.406	1.967	2.135	2.253	10.773	4.06	3.539	1.477	0.23	5.3	2.122	2.134	1.534	0.375	0.73	1.831	0.87	1.403	0.775	0.480186
ENSG00000167525	PROCA1	6.973	2.725	1.698	0.805	0.632	2.731	1.205	1.431	0.126	0.226	1.307	0.227	0.19	0.193	0.499	0.121	0.701	0.376	0.827	1.293	0.48
ENSG00000087495	PHACTR3	0.077	0.491	12.572	0	0.005	0.012	1.393	1.76	0.559	0.071	0.07	2.841	0.005	0.001	0	0.466	0.229	0.37	2.006	0.648	0.479657
ENSG00000165434	PGM2L1	18.125	7.935	9.461	0.655	0.573	13.343	1.028	4.512	2.606	0.574	1.684	1.7	5.475	1.07	6.777	1.355	2.154	1.55	3.835	1.528	0.479471
ENSG00000082556	OPRK1	0.471	1.22	0.138	0.004	0	0	0.012	0.191	0	0	0	0	0.006	0.001	0	0.014	0.002	0.015	0	0	0.479433
ENSG00000197838	CYP2A13	0.346	0.313	0.084	0	0	0	0.002	0	0	0	0	0	0	0	0	0	0.044	0	0	0.031	0.479424
ENSG00000042304	C2orf83	0	0	0.097	0	0	0	0	0.003	0	0	0	0	0	0	0	0	0	0	0.021	0	0.479138
ENSG00000182150	C9orf102	5.751	5.506	3.454	2.546	1.663	5.823	4.262	4.504	2.247	0.838	4.584	2.241	2.903	4.268	1.031	3.64	2.362	1.804	2.253	1.567	0.479118
ENSG00000128487	SPECC1	15.925	11.214	13.568	0.087	0.42	5.709	5.894	4.918	6.421	3.349	4.478	8.378	4.597	2.84	2.062	2.892	3.973	1.157	10.896	2.909	0.478868
ENSG00000148019	CEP78	7.377	8.14	2.992	2.252	2.332	3.713	3.287	3.409	2.164	0.916	9.345	3.013	1.697	2.081	1.702	1.516	1.819	0.82	2.085	1.859	0.478227
ENSG00000160949	TONSL	13.747	21.096	7.335	5.874	23.115	4.595	6.26	5.848	2.013	21.949	2.045	7.273	0.473	1.208	7.376	0.693	5.022	0.919	3.157	4.209	0.478175
ENSG00000147117	ZNF157	0.754	0.593	0.853	0	0.012	0.727	0.087	0.18	0.084	0.041	0.407	0.175	0.174	0.016	0	0.727	0.131	0.048	0.084	0.131	0.478144
ENSG00000165244	ZNF367	3.862	7.217	4.243	2.592	11.997	3.724	4.663	5.59	1.488	6.85	2.478	4.819	0.85	3.548	1.758	0.564	2.032	3.212	3.314	0.462	0.47808
ENSG00000175928	LRRN1	208.947	130.516	31.987	0.054	0.048	3.742	12.083	15.089	0.438	0.059	0.185	0.072	12.255	1.427	0.025	2.399	0.248	0.055	3.21	0.843	0.477882
ENSG00000113327	GABRG2	2.048	0.401	4.685	0	0	0	0.006	1.023	0	0	0	0	0	0	0	2.273	0.016	0	0.087	0.065	0.477848
ENSG00000127780	OR1E2	0	0	0.291	0.024	0	0	0	0	0.005	0.089	0	0	0	0.006	0	0	0.014	0	0	0.054	0.477809
ENSG00000102302	FGD1	20.07	14.758	33.683	17.172	23.279	1.027	5.955	5.961	5.008	49.616	1.438	10.184	2.621	5.025	7.432	5.403	6.584	4.133	5.149	5.688	0.477772
ENSG00000123901	GPR83	1.7	0.345	0.78	0.015	0.022	0.029	0.097	0.823	0.032	0.009	0.065	0.02	0.139	0.024	0.045	0.048	0.066	0.042	0	0.208	0.477747
ENSG00000166793	YPEL4	0.025	0.003	3.918	0.234	0.044	2.615	0.401	1.007	0.012	0.338	0.39	0.016	0.547	0.109	0.03	0.077	0.719	0.312	0.347	0.365	0.477725
ENSG00000183431	SF3A3	49.617	54.678	17.249	26.568	19.475	38.077	16.779	17.154	27.667	11.152	21.324	34.938	29.379	33.296	19.014	13.488	15.542	14.105	19.026	10.725	0.477718
ENSG00000104889	RNASEH2A	80.839	69.132	56.294	60.961	94.509	21.974	12.817	13.673	20.293	129.197	3.155	65.548	5.1	22.119	38.544	5.339	17.139	8.402	22.937	7.532	0.477627
ENSG00000164588	HCN1	2.596	1.161	1.213	0	0	0	0.131	0.11	0	0	0	0	0.003	0	0	0.735	0.009	0.264	0	0.071	0.477496
ENSG00000170419	VSTM2A	0.301	0.212	8.992	0	0	0	0.066	0.685	0	0	0	0	0	0	0	1.418	1.113	0	0.249	0.053	0.477151
ENSG00000083642	PDS5B	7.915	11.833	7.007	2.615	2.47	8.75	6.642	7.198	2.137	0.744	7.684	2.935	5.121	5.686	1.646	6.297	3.366	2.934	4.903	2.21	0.477078
ENSG00000102271	KLHL4	5.047	12.792	4.174	0.008	0.004	0	0.633	2.006	1.825	0	0.141	0.756	0.002	0.44	5.512	0.227	0.302	0.748	0.144	0.203	0.477003
ENSG00000139364	TMEM132B	20.577	8.171	5.54	0.06	0.132	0.002	0.133	0.436	0.122	0.005	0.01	0.165	0.018	0.08	0.008	0.945	0.437	0.126	0.119	0.106	0.476984
ENSG00000165970	SLC6A5	0.009	0.03	0.004	0	0	0	0.006	0.007	0.002	0	0	0.004	0	0	0	0	0.001	0.002	0	0	0.476678
ENSG00000229415	SFTA3	0	0	0.403	0	0	0	0.001	0	0	0	0	0	0	0.002	0	0	0	0.005	0	0.084	0.476555
ENSG00000153015	CWC27	33.727	20.248	15.401	11.778	4.287	15.072	7.657	8.124	9.553	1.194	5.033	5.725	9.609	11.68	2.851	8.637	7.178	12.15	11.356	4.581	0.476549
ENSG00000213462	ERV3-1	4.949	4.416	39.619	1.523	1.761	17.186	8.027	12.002	1.677	0.309	7.136	0.901	3.188	2.07	18.325	7.238	6.305	1.998	1.915	2.616	0.476364
ENSG00000169181	GSG1L	0.109	0.061	1.546	0	0	0.008	0.035	0.412	0	0.998	0.024	0	0.042	0	0.038	0	0.066	0.021	0.076	0.01	0.476362
ENSG00000164151	KIAA0947	22.498	24.231	8.477	11.712	4.713	15.77	11.348	12.63	13.902	3.256	15.135	10.156	15.48	12.04	7.814	10.029	6.271	7.981	5.426	6.365	0.476337
ENSG00000067842	ATP2B3	0.115	0.065	1.57	0	0.003	0	0.136	0.869	0	0.007	0.005	0	0.008	0	0.029	0.335	0.03	0.006	0.026	0.084	0.476276
ENSG00000215462	NA	2.584	4.605	22.055	3.401	2.464	1.3	2.515	3.506	6.502	2.91	2.684	2.785	4.91	8.76	1.122	4.814	2.732	4.369	4.8	0.806	0.476029
ENSG00000136866	ZFP37	0.956	2.439	2.744	0.465	0.198	0.289	0.746	1.114	0.213	0.044	0.291	0.241	1.433	0.595	0.119	1.253	0.943	0.448	0.7	0.622	0.475988
ENSG00000110427	C11orf41	0.972	0.788	10.728	5.212	14.279	0.003	0.101	0.468	2.391	2.153	0.013	2.941	0.207	0.576	3.752	2.533	0.342	0.05	0.037	0.444	0.475976
ENSG00000167635	ZNF146	67.094	71.08	25.126	25.824	11.392	57.035	36.346	35.644	35.587	3.97	11.252	26.491	38.53	35.56	8.685	25.499	17.605	19.014	25.348	12.227	0.475929
ENSG00000164048	ZNF589	42.214	28.681	12.541	2.01	1.172	8.662	2.698	3.063	5.778	2.188	9.982	4.611	1.266	1.205	3.308	3.111	6.719	1.936	2.268	8.692	0.475921
ENSG00000128602	SMO	35.205	39.08	16.116	1.899	1.896	10.528	12.86	12.949	4.503	25.991	0.105	6.508	6.459	3.838	14.804	2.237	12.416	1.954	4.308	6.331	0.475698
ENSG00000163214	DHX57	8.316	10.97	7.398	4.866	3.126	6.175	4.481	4.765	9.28	1.989	7.363	9.022	4.724	8.202	4.239	5.868	3.253	2.972	3.489	3.672	0.475333
ENSG00000148123	NA	0.757	0.721	6.891	0	0	0	0.618	0.292	0.008	0	0	0.025	0.041	0	0.058	2.64	0.033	0	0.032	0.303	0.475229
ENSG00000173699	SPATA3	0	0	0.06	0	0	0	0.002	0	0	0.005	0.032	0	0	0	0	0	0.005	0	0	0	0.475122
ENSG00000186790	FOXE3	0.112	0.257	0.079	0.053	0.414	0.016	0.008	0.059	0.01	0.032	0.071	0.037	0.158	0.012	0.033	0	0.014	0.008	0	0	0.474956
ENSG00000165304	MELK	21.464	28.823	11.589	19.855	25.45	1.61	4.936	4.411	21.355	11.659	0.229	29.945	0.045	23.258	13.265	0.171	2.113	0.137	4.269	0.187	0.474703
ENSG00000179021	C3orf38	13.341	22.784	11.383	9.671	6.067	25.552	10.092	9.959	13.283	4.381	18.037	9.61	9.638	14.881	5.232	8.643	5.326	5.123	11.747	4.157	0.474616
ENSG00000140600	SH3GL3	5.117	4.464	3.48	0.021	0.014	0.506	0.273	1.564	0.045	0	0	0.085	0.046	0.024	0.006	0.08	3.729	0	0.305	0.23	0.474591
ENSG00000198498	C4orf43	28.016	20.321	4.172	8.417	7.089	15.649	8.331	8.045	5.67	2.379	2.358	5.199	6.988	7.884	1.569	4.346	4.429	4.257	7.68	4.597	0.474486
ENSG00000182389	CACNB4	1.469	0.541	2.194	0.015	0.013	0.363	0.292	0.499	0.086	0.036	0.33	0.001	1.172	0.322	0.037	0.193	1.015	0.022	0.303	0.255	0.474264
ENSG00000137764	MAP2K5	4.757	5.569	9.79	9.296	4.539	11.151	4.31	3.793	1.367	7.726	6.211	2.076	4.129	1.849	2.466	5.262	3.885	5.558	4.435	4.363	0.473982
ENSG00000058804	TMEM48	56.446	43.537	7.651	13.086	10.872	12.348	11.573	11.127	21.015	10.28	4.955	23.624	6.798	14.23	14.362	4.902	6.114	6.165	5.318	3.305	0.47365
ENSG00000165443	PHYHIPL	0.151	0.991	40.444	0.006	0.003	0.017	9.186	10.002	0.024	0.025	0	0.036	0.86	0.008	0	10.55	0.191	0.031	0.221	3.416	0.47355
ENSG00000118965	WDR35	7.2	10.485	5.7	5.174	1.118	10.654	3.701	4.981	5.097	1.691	2.302	3.645	5.522	5.233	3.067	6.22	2.937	2.879	1.977	3.349	0.473527
ENSG00000169064	ZBBX	0.339	0.338	0.239	0	0	0.693	0	0.055	0	0	0	0	0.014	0	0	0.144	0	0	0	0.029	0.473415
ENSG00000137563	GGH	23.936	18.773	12.21	9.542	7.07	6.616	36.138	14.852	10.62	16.404	0.607	12.185	5.065	14.983	13.895	2.28	5.091	0.864	6.511	1.762	0.473359
ENSG00000196476	C20orf96	19.886	17.385	22.858	11.086	4.455	17.362	5.638	7.731	3.58	8.223	4.764	2.518	2.23	6.002	22.798	7.876	4.751	3.19	8.321	13.098	0.473252
ENSG00000142556	ZNF614	7.469	11.524	5.473	1.946	0.959	10.79	4.655	4.795	4.183	0.869	2.554	3.306	7.997	3.976	1.64	3.397	2.841	3.641	2.289	1.683	0.473211
ENSG00000166682	TMPRSS5	0.199	0.278	9.762	0.082	0.132	0.292	0.232	0.502	0.087	2.563	0.839	0.152	0.634	0.025	0.573	0.157	0.422	0.383	0.308	1.666	0.473197
ENSG00000189339	SLC35E2B	18.191	18.735	36.198	40.289	18.578	30.061	16.997	16.851	7.237	20.485	28.69	6.129	4.964	11.555	18.514	19.553	17.391	8.547	12.054	26.032	0.473063
ENSG00000145555	MYO10	28.452	32.927	28.674	21.625	35.789	0.121	18.729	15.616	12.47	43.464	0.305	10.543	14.393	11.176	19.316	13.626	4.439	1.529	16.088	20.445	0.472899
ENSG00000128011	LRFN1	8.357	4.798	6.226	0.318	0.687	3.52	0.515	0.961	0.094	3.669	4.616	0.249	0.348	0.028	0.43	3.105	1.107	0.22	1.967	3.003	0.472653
ENSG00000070814	TCOF1	30.106	30.688	7.411	16.349	26.952	9.716	6.259	6.65	6.154	7.648	16.34	15.229	16.744	3.606	4.14	4.34	7.857	6.67	7.929	12.062	0.472636
ENSG00000111206	FOXM1	47.823	53.102	43.795	68.753	63.124	4.31	7.703	8.35	6.76	122.285	3.972	24.19	0.13	19.771	24.787	0.185	4.902	0.136	8.312	0.368	0.47254
ENSG00000197414	GOLGA6L1	0.006	0.008	0.004	0	0	0.004	0.004	0.006	0	0	0	0	0.001	0	0.001	0	0	0.006	0	0	0.47239
ENSG00000183379	SYNDIG1L	2.393	0.389	10.792	0.013	0	0.01	0.043	0.058	0	0.019	0.035	0	0.843	0.005	0.012	3.807	0.072	0.031	0	0.422	0.472152
ENSG00000108878	CACNG1	0.019	0.036	1.256	0	0	0.008	0.467	0.196	0	0	0.25	0	0.018	0	0	0.255	0	0.019	0	0.226	0.472076
ENSG00000182362	YBEY	8.522	13.215	8.341	6.796	9.623	10.707	6.856	6.5	7.312	3.774	6.048	4.121	2.524	5.484	4.646	9.432	3.603	4.738	8.754	7.246	0.472042
ENSG00000166860	ZBTB39	11.699	13.219	2.538	4.095	3.382	7.453	4.458	4.662	4.274	2.566	8.52	4.88	3.083	2.864	6.447	2.611	2.629	2.185	2.312	2.624	0.471907
ENSG00000187123	LYPD6	2.71	3.354	2.958	1.647	1.632	0.177	2.528	2.923	1.948	1.24	0	0.068	0.073	1.745	2.815	1.266	0.966	0.038	2.046	1.312	0.471655
ENSG00000178150	ZNF114	5.993	7.705	1.554	0.058	0.249	1.715	1.372	1.213	0.237	0.542	0.021	5.057	0.073	0.137	0.197	0.084	0.229	0.216	0.145	0.487	0.471536
ENSG00000176890	TYMS	48.198	134.984	69.561	43.755	214.571	65.01	49.166	45.5	35.22	139.984	7.119	79.695	3.3	72.558	100.429	1.627	10.335	0.598	19.62	2.06	0.471531
ENSG00000101639	CEP192	4.708	7.699	5.866	3.482	2.715	10.562	8.18	7.469	5.054	1.218	8.998	4.865	1.458	5.501	5.183	2.809	3.125	1.995	2.072	2.879	0.47129
ENSG00000196876	SCN8A	3.351	3.026	9.577	9.756	6.372	0.163	0.547	0.721	0.657	0.061	0.073	0.44	0.968	6.225	6.976	3.153	0.148	0.038	0.037	2.022	0.471274
ENSG00000166484	MAPK7	11.912	15.481	39.035	18.797	24.142	3.912	8.95	10.047	2.971	23.88	28.935	5.723	17.219	4.536	11.186	7.38	19.736	7.886	9.139	10.202	0.471272
ENSG00000204209	DAXX	44.414	38.04	24.247	39.874	45.26	22.445	14.904	14.616	16.41	35.988	16.46	18.184	30.712	15.429	13.71	15.312	22.437	15.638	29.081	18.674	0.471022
ENSG00000167720	SRR	2.705	6.182	19.023	10.308	10.659	16.584	11.672	14.192	8.313	7.251	9.103	11.406	1.632	15.647	7.011	7.339	5.471	3.856	7.511	4.431	0.471017
ENSG00000081721	DUSP12	14.488	14.636	23.239	21.391	13.939	15.012	10.297	11.39	16.732	8.611	23.763	12.81	19.037	16.444	16.032	12.95	9.186	6.995	17.141	9.431	0.470903
ENSG00000175029	CTBP2	44.321	50.863	26.959	24.41	18.59	13.62	13.045	13.966	25.046	13.379	8.871	39.418	18.233	19.02	26.972	8.246	11.863	7.437	23.421	19.96	0.470827
ENSG00000168078	PBK	3.861	11.341	20.274	13.686	12.689	0.26	7.093	6.682	10.419	11.487	0.136	20.397	0.017	18.991	9.565	0.133	2.828	0.052	5.602	0.352	0.47046
ENSG00000165863	C10orf82	7.646	6.974	0.902	0.007	0	0	1.092	1.071	0.219	0.014	0.445	0.528	0.41	0.03	0	0.014	0.3	0.042	0.442	0.169	0.470416
ENSG00000167550	RHEBL1	4.427	3.017	2.226	0.819	0.76	2.297	0.443	0.51	0.44	3.934	2.084	1.653	2.342	0.23	1.639	0.318	0.337	0.399	1.05	0.56	0.470413
ENSG00000138814	PPP3CA	28.921	21.176	22.582	18.587	13.97	24.914	14.221	13.973	27.515	5.508	16.521	22.522	3.581	29.326	6.684	13.728	10.388	8.221	19.783	8.232	0.470263
ENSG00000135164	DMTF1	17.395	15.499	32.915	14.181	4.886	42.414	20.495	25.854	16.511	1.398	31.629	6.846	10.62	10.179	18.3	10.678	12.228	4.909	5.706	16.261	0.470217
ENSG00000173451	THAP2	1.432	1.593	7.291	1.119	0.477	4.393	4.048	4.298	1.019	0.316	3.538	0.644	3.732	0.731	0.617	1.732	1.665	1.9	1.407	1.125	0.470112
ENSG00000182093	WRB	4.878	8.66	24.897	7.046	4.797	6.652	5.759	7.363	8.246	7.084	1.47	6.794	3.053	10.395	9.29	9.223	4.794	7.268	6.654	3.921	0.470105
ENSG00000151612	ZNF827	9.714	7.88	9.23	5.499	5.87	6.513	13.015	14.652	3.769	6.966	7.152	4.366	5.085	3.227	5.15	8.545	4.225	4.788	2.841	3.873	0.469974
ENSG00000171988	JMJD1C	46.806	35.386	15.516	13.752	5.715	38.02	26.042	24.195	10.459	1.296	38.515	7.607	29.883	11.682	12.139	14.419	9.104	6.044	5.143	6.954	0.469875
ENSG00000099783	HNRNPM	131.558	235.712	91.993	93.162	136.853	163.778	105.39	106.155	74.484	79.615	114.911	95.832	122.894	77.579	126.216	72.34	76.745	92.184	114.212	69.856	0.469305
ENSG00000196418	ZNF124	4.229	5.927	0.759	0.691	0.69	3.854	2.902	3.001	0.981	0.663	4.167	0.979	0.915	0.905	1.229	0.738	0.471	0.377	1.149	0.651	0.469143
ENSG00000196419	XRCC6	174.602	280.553	91.468	123.282	113.573	129.508	102.182	100.037	121.942	85.947	79.186	116.434	179.444	113.245	55.212	85.331	79.545	115.344	109.191	47.843	0.469054
ENSG00000250091	DNAH10OS	0.037	0.275	12.811	0.807	0.308	1.281	0.404	0.684	0.119	0.065	0.902	0.11	1.141	0.778	0.203	0.865	0.515	2.391	0.715	0.946	0.469037
ENSG00000144559	TAMM41	3.419	3.61	3.716	4.215	3.142	4.814	2.761	2.809	4.301	2.089	3.056	2.81	1.878	1.64	2.626	2.049	2.887	1.878	2.583	4.394	0.468798
ENSG00000138769	CDKL2	0.673	0.341	2.391	0.351	0.067	0.087	0.606	0.851	0.444	0.093	0.034	0.721	0.584	0.241	0.202	1.153	0.158	0.037	0.169	0.267	0.468616
ENSG00000187416	LHFPL3	0.149	0.071	7.046	0.007	0.003	0.02	6.776	5.38	0	0.012	0.084	0	0	0.004	0	0.005	0.004	0	0.04	0	0.468589
ENSG00000101977	MCF2	0.374	0.284	0.708	0	0.005	0.057	0.019	0.052	0.278	0.338	0.576	0.076	0.046	0.017	0.014	0.053	0.039	0.179	0.206	0.095	0.468308
ENSG00000152822	GRM1	0.299	0.296	1.813	0.026	0.001	0.029	0.005	0.031	0.003	0.106	0	0.004	0.005	0.008	0.041	0.266	0.004	0.697	0	0.018	0.468151
ENSG00000047230	CTPS2	8.827	14.582	12.018	2.968	2.523	13.617	16.484	15.345	6.683	4.202	2.243	4.928	1.12	3.673	5.72	6.425	5.124	2.068	6.787	6.89	0.467942
ENSG00000144580	RQCD1	29.999	36.816	13.835	15.944	23.974	17.375	14.309	14.163	20.945	23.57	18.111	21.49	17.015	21.48	24.274	10.795	12.449	9.131	13.62	13.466	0.467909
ENSG00000135916	ITM2C	319.637	218.177	86.945	73.514	133.799	224.388	236.947	163.894	30.388	293.966	19.584	44.011	8.568	84.84	7.975	117.061	72.265	16.576	46.459	47.003	0.467604
ENSG00000139910	NOVA1	2.178	4.153	10.817	1.646	1.23	0.033	2.378	3.045	0	0	0.03	0	0.597	1.089	1.067	6.246	1.19	0.923	0.928	1.344	0.467574
ENSG00000135454	B4GALNT1	0.212	0.769	32.252	0.052	0.269	0.035	0.361	1.099	0.041	1.243	0.006	4.022	13.449	0.747	0.091	1.161	0.485	1.03	0.242	0.254	0.46753
ENSG00000179542	SLITRK4	5.693	0.867	3.256	0.008	0.01	1.192	4.169	6.287	0.005	0.084	0.406	0	0.01	0.006	0.012	0.173	0.23	0.093	0.058	0.3	0.467371
ENSG00000242715	CCDC169	5.536	4.177	0.082	0.781	0.318	2.012	1.001	0.537	0.092	0.267	0	0.104	0.057	0.86	0.275	0.023	0.331	0.113	0.397	0.128	0.467328
ENSG00000167447	SMG8	14.693	16.56	8.252	9.017	6.449	5.032	9.555	9.197	17.674	8.871	6.264	13.573	7.25	10.79	10.833	6.872	4.735	4.21	4.759	1.948	0.467306
ENSG00000068489	PRR11	98.876	29.551	24.762	67.626	31.039	7.19	6.116	5.686	28.966	26.417	4.906	66.256	0.115	29.101	22.715	0.557	1.896	0.423	2.74	0.111	0.467275
ENSG00000111879	FAM184A	2.825	4.992	3.421	0.135	0.062	0.753	4.598	3.928	0.033	0.005	0.495	0.008	3.34	0.077	0.026	2.446	0.556	0.086	0.25	0.944	0.467087
ENSG00000152076	CCDC74B	1.399	3.085	2.589	0.739	1.581	0	0.279	0.608	0.193	1.527	0.02	1.321	0.32	0.379	1.406	0.779	0.911	0.147	0.763	1.383	0.466897
ENSG00000108278	ZNHIT3	49.745	48.727	52.681	24.174	23.621	47.711	28.755	26.98	47.27	18.577	32.449	33.985	30.389	28.704	35.791	30.966	22.044	22.12	52.063	19.844	0.466879
ENSG00000078018	MAP2	0.798	9.223	127.044	0.948	1.29	0.004	0.844	4.864	5.554	1.147	0.059	0.945	21.219	10.48	4.206	29.054	1.3	2.975	1.763	4.517	0.466871
ENSG00000223551	TMSL4	49.195	16.211	12.195	4.408	3.79	3.008	7.112	8.533	7.42	0.529	4.406	0.842	2.9	2.683	3.297	4.072	2.052	0.399	3.851	5.503	0.466691
ENSG00000124181	PLCG1	31.75	46.194	58.872	25.759	29.349	3.719	27.39	33.62	17.858	33.909	44.023	20.822	7.29	12.345	61.774	7.323	23.795	16.676	10.396	24.52	0.466621
ENSG00000172775	FAM192A	37.339	26.003	54.617	28.514	26.511	37.619	21.591	22.948	24.951	14.389	27.672	26.129	9.5	26.202	30.503	19.098	28.471	27.423	28.118	31.494	0.466505
ENSG00000151445	C14orf133	7.991	11.398	21.515	14.602	6.62	19.11	12.676	11.538	14.729	10.928	8.18	10.547	4.111	13.513	19.733	9.474	9.058	7.314	6.83	7.439	0.466324
ENSG00000100722	ZC3H14	16.11	25.984	18.873	14.942	7.906	18.222	19.385	19.162	22.157	4.404	8.614	16.923	13.933	16.351	10.094	18.939	9.821	7.847	10.212	13.141	0.466307
ENSG00000140543	DET1	3.281	6.24	7.583	10.573	4.68	5.66	6.913	6.77	1.663	6.041	2.771	2.243	2.13	5.889	4.711	5.22	2.968	4.168	3.807	3.98	0.466294
ENSG00000121741	ZMYM2	23.189	31.585	14.384	5.087	1.956	26.658	14.451	15.559	11.201	2.529	18.902	5.133	6.162	8.818	5.203	11.086	11.602	6.308	7.813	9.148	0.466198
ENSG00000105784	RUNDC3B	0.472	0.261	2.932	0.098	0.045	0.466	0.942	0.732	0.268	0.054	0.215	0.127	0.247	0.105	0.137	0.941	0.638	0.316	0.069	0.305	0.466071
ENSG00000183647	ZNF530	2.515	3.572	1.504	1.172	2.076	2.226	2.023	2.038	2.444	0.783	1.739	2.369	0.719	1.312	1.075	0.965	1.494	2.331	0.675	1.139	0.46604
ENSG00000176428	VPS37D	1.992	2.64	30.31	2.895	1.64	0.033	2.726	2.862	0.922	7.476	0.567	0.623	0.403	0.594	2.458	4.98	1.693	1.283	3.079	6.375	0.466025
ENSG00000166863	TAC3	6.068	3.757	10.305	0.007	0.017	0.02	12.842	16.096	0.01	0	0.124	0	0.079	0.16	0.01	0.154	0.59	0.009	0.831	0.194	0.466004
ENSG00000235961	PNMA6C	1.061	1.37	3.189	0.909	0.532	1.652	3.052	2.774	0.104	4.368	0.02	0.013	0.047	0.283	0.578	0.653	0.08	0.755	0.057	0.78	0.465981
ENSG00000144040	SFXN5	3.544	3.701	7.249	1.045	2.798	3.656	6.008	4.057	1.115	2.106	3.241	2.175	1.731	1.317	3.657	2.637	2.515	1.918	3.751	2.91	0.465959
ENSG00000119640	ACYP1	7.582	4.248	22.98	5.08	4.374	13.111	6.094	6.817	6.247	2.527	3.256	6.782	4.818	3.402	6.392	6.042	8.483	4.282	4.314	8.745	0.465928
ENSG00000143569	UBAP2L	55.957	55.905	59.73	61.41	101.405	32.261	26.005	27.378	44.495	80.343	40.754	47.833	46.889	50.63	67.727	41.452	22.624	23.898	20.288	23.255	0.465888
ENSG00000257088	PNMA6D	0.467	0.907	1.531	0.525	0.294	1.048	1.894	1.89	0.065	1.964	0.069	0	0.046	0.155	0.239	0.328	0.142	0.429	0.349	0.159	0.465793
ENSG00000105486	LIG1	21.482	36.594	22.405	13.491	45.525	15.895	16.273	16.208	6.086	30.588	12.381	21.166	2.016	6.966	24.996	4.733	12.802	1.847	7.577	23.84	0.465775
ENSG00000152240	HAUS1	70.115	91.327	26.303	20.189	14.247	43.123	14.639	16.287	17.984	9.289	7.407	26.696	7.246	33.774	16.802	9.632	15.976	13.198	34.247	15.346	0.465718
ENSG00000121440	PDZRN3	3.684	4.027	152.629	11.303	11.534	0	6.847	12.871	0.001	5.845	0.008	0.598	12.779	4.784	0.002	9.157	26.81	16.732	15.582	3.674	0.465541
ENSG00000215343	ZNF705D	0.014	0.014	0	0	0.003	0.003	0.009	0.005	0.002	0	0.007	0	0.004	0.004	0	0.002	0	0	0	0	0.465345
ENSG00000090061	CCNK	15.572	14.453	15.29	18.186	25.901	12.668	10.165	9.841	2.403	13.744	23.363	1.689	19.478	1.827	2.768	15.649	6.404	4.95	6.773	6.434	0.46523
ENSG00000125319	C17orf53	8.978	10.077	4.565	6.791	15.485	1.542	1.711	1.791	2.548	12.975	0.911	9.048	1.737	2.267	6.161	0.248	1.434	0.359	0.995	0.405	0.465153
ENSG00000176034	CXorf59	0	0.027	0.12	0	0	0.014	0.022	0.027	0	0	0	0	0	0	0.019	0.058	0	0	0	0	0.465102
ENSG00000170921	TANC2	1.25	2.733	23.831	28.121	19.132	4.928	3.268	5.095	9.221	5.648	8.743	11.398	7.124	4.157	3.202	13.083	2.754	2.479	2.57	3.445	0.464884
ENSG00000182916	TCEAL7	6.613	14.243	35.273	7.225	6.456	3.39	6.276	16.04	0.132	4.253	0	3.277	16.705	23.065	3.617	1.643	5.469	2.518	15.126	1.02	0.464682
ENSG00000170558	CDH2	66.579	73.253	163.404	12.312	10.222	4.909	5.338	8.408	0.377	1.291	0.144	0.009	0.391	9.379	30.322	4.95	0.772	116.958	5.934	0.381	0.464462
ENSG00000087258	GNAO1	5.932	4.2	152.704	0.063	0.126	0.02	1.888	6.323	0.041	0.263	1.434	0.075	0.065	0.019	0.003	38.807	6.184	1.793	1.711	4.654	0.464452
ENSG00000152782	PANK1	13.506	18.515	4.916	1.491	1.238	2.809	13.078	16.069	3.764	3.95	0.233	3.573	0.139	2.304	1.199	1.657	1.494	4.573	3.472	0.67	0.464438
ENSG00000103932	RPAP1	24.431	24.131	14.347	27.485	24.222	11.047	10.602	9.636	6.422	32.507	8.575	8.828	10.977	4.148	13.528	9.974	9.322	10.902	7.383	12.858	0.464373
ENSG00000177875	C12orf68	1.256	1.267	18.827	1.425	0.3	0.583	0.179	2.143	0.295	0.903	0.135	0.243	2.01	0.221	0.318	4.535	1.513	0.753	1.9	1.142	0.46433
ENSG00000128045	RASL11B	50.59	33.271	12.836	0.817	1.515	0.069	0.715	1.061	1	0.062	0.168	2.627	9.743	5.023	0.505	1.318	1.485	4.085	3.605	0.935	0.464222
ENSG00000172845	SP3	8.851	20.267	20.395	10.996	5.443	23.277	19.734	18.746	10.426	3.557	28.632	8.295	13.531	13.936	6.056	10.736	8.989	5.674	11.496	4.881	0.464049
ENSG00000168930	TRIM49	0	0	0.039	0.021	0.007	0	0.004	0.001	0.007	0	0.021	0.033	0	0	0	0	0	0	0	0	0.463993
ENSG00000141027	NCOR1	20.908	24.933	33.209	36.533	19.226	29.55	35.155	34.249	21.5	4.846	34.536	20.77	26.298	26.253	22.165	27.419	15.85	14.278	17.45	17.633	0.463986
ENSG00000139133	ALG10	5.052	3.529	1.222	1.502	1.495	6.976	3.104	2.937	2.64	1.267	1.999	2.379	0.905	1.483	1.516	1.172	0.697	0.84	1.193	0.838	0.463969
ENSG00000155052	CNTNAP5	0.095	0.152	2.889	0.002	0.002	0.036	0.081	1.495	0	0	0	0	0	0	0.002	0.745	0.015	0	0.024	0.151	0.463968
ENSG00000162374	ELAVL4	0.61	0.439	53.164	0	0	0.272	0.696	7.563	0.001	0	0.013	0	0.002	0	0	14.691	0.101	0	0.13	1.204	0.463812
ENSG00000182771	GRID1	0.084	0.102	4.071	0.056	0.131	0.003	0.157	0.498	0.011	0.01	0.005	0.015	0.122	0.012	0.013	0.342	0.415	0.626	0.152	0.148	0.463778
ENSG00000188501	LCTL	2.099	2.725	0.133	0.046	0.007	1.674	1.095	1.233	0.173	0.034	0.472	1.671	0.006	0.708	0.027	0	0.01	0	0	0.005	0.463655
ENSG00000134057	CCNB1	119.967	128.705	27.099	62.727	17.852	6.372	14.971	14.01	47.269	41.825	0.677	97.623	4.064	46.759	37.268	1.781	13.491	1.476	11.706	1.482	0.463547
ENSG00000143630	HCN3	3.579	2.542	46.802	1.165	1.235	3.075	12.508	13.098	2.472	2.197	1.025	2.946	1.325	0.601	4.13	11.011	5.868	1.077	1.621	7.816	0.463513
ENSG00000187033	SAMD7	0	0	0.028	0	0	0	0.01	0	0	0	0	0	0.015	0	0	0	0	0.002	0	0	0.463478
ENSG00000205014	NA	2.028	2.066	2.951	1.18	0.716	0.958	0.623	0.731	1.079	0.479	1.298	1.159	1.072	0.825	2.32	1.364	0.878	1.333	0.511	1.092	0.46302
ENSG00000111642	CHD4	82.594	101.838	48.122	61.03	63.494	103.872	49.699	51.389	36.859	40.108	54.186	32.04	43.316	33.477	32.526	42.862	45.898	61.662	47.2	54.701	0.462962
ENSG00000164591	MYOZ3	4.141	3.701	1.304	0.013	0.017	4.683	0.425	0.635	0.011	0.204	0.008	0	0.036	0.071	0.159	0.146	0.292	1.176	0.561	0.185	0.46282
ENSG00000168913	ENHO	11.783	15.857	70.979	0.011	0.154	0.02	5.103	6.277	0.033	2.758	2.305	0.384	0.085	0.028	0.079	1.753	0.91	0.203	37.167	2.256	0.462807
ENSG00000105983	LMBR1	17.642	14.792	7.789	4.685	4.465	8.116	10.24	8.128	9.67	4.283	5.225	9.316	5.771	10.578	5.558	8.385	4.357	6.61	5.033	2.384	0.462701
ENSG00000255374	TAS2R43	0.066	0	0.295	0.341	0.638	0.549	0.331	0.358	0.16	0.174	0.6	0.007	0.171	0.008	0.127	0.031	0.013	0.016	0	0.026	0.46259
ENSG00000122507	BBS9	14.267	6.157	9.585	3.002	2.193	11.014	3.024	3.155	3.918	2.159	3.438	2.619	1.812	7.033	2.61	6.698	2.437	4.954	3.218	2.134	0.462449
ENSG00000143494	VASH2	60.143	34.575	8.565	0.036	0.136	0.382	1.355	1.776	0.012	0.134	0.176	0.061	0.715	0.127	0.193	0.092	0.47	0.167	0.64	0.112	0.46239
ENSG00000143321	HDGF	123.472	142.608	107.112	157.066	141.04	90.834	80.056	77.411	108.686	156.583	49.618	93.924	186.688	50.273	55.61	53.242	54.58	84.498	115.83	45.443	0.462378
ENSG00000188994	ZNF292	10.445	9.477	18.489	4.041	2.422	20.219	14.001	13.237	3.86	0.846	21.778	3.533	12.497	6.329	1.957	8.454	5.678	3.357	2.234	5.054	0.462227
ENSG00000148604	RGR	0	0.008	1.333	0	0	0	0.023	0.059	0	0	0	0	0.026	0	0	0	0.078	0.282	0.015	0.025	0.462189
ENSG00000171848	RRM2	40.984	65.268	13.198	19.686	75.112	2.575	10.586	10.091	8.077	27.239	2.013	35.797	0.103	24.94	17.375	0.171	5.915	0.145	15.34	0.376	0.462108
ENSG00000183495	EP400	14.374	16.298	16.118	20.09	25.707	12.052	10.51	10.997	1.584	9.818	18.533	1.935	10.227	1.539	3.88	9.853	9.6	5.665	5.421	19.166	0.461792
ENSG00000177302	TOP3A	8.642	12.296	8.611	13.128	12.695	10.507	7.042	7.276	4.143	8.791	12.01	9.121	7.343	5.578	8.554	4.418	6.932	6.221	5.797	10.818	0.461683
ENSG00000072571	HMMR	63.063	44.066	2.355	11.52	6.052	1.656	4.84	3.749	5.436	1.841	0.295	9.521	0.27	8.031	3.407	0.156	1.123	0.216	2.702	0.105	0.46168
ENSG00000167674	NA	42.534	54.326	39.435	38.213	63.672	33.201	22.692	24.671	16.586	37.231	12.155	21.088	14.793	14.693	21.652	13.56	31.709	27.894	28.25	42.984	0.461653
ENSG00000078403	MLLT10	13.199	16.384	19.331	14.339	5.54	32.919	10.541	12.664	14.637	4.5	14.075	9.381	8.732	9.593	17.483	11.344	9.741	6.831	6.234	8.592	0.461406
ENSG00000213988	ZNF90	29.79	14.875	3.058	1.258	1.474	2.596	8.267	9.444	1.74	0.313	0.875	0.23	0.31	0.859	0.605	0.624	1.162	0.256	0.863	2.253	0.461405
ENSG00000121905	HPCA	0.642	0.314	39.274	0.983	0.016	0.003	2.798	1.851	0.008	3.708	0.068	0.004	0.254	0.02	0.003	9.55	0.995	0.061	2.238	1.49	0.461295
ENSG00000146083	RNF44	44.247	42.819	40.632	11.186	6.734	26.877	20.125	18.149	4.178	16.198	72.639	4.918	16.238	0.994	11.101	12.796	13.786	7.429	12.1	17.658	0.461249
ENSG00000069956	MAPK6	43.193	70.691	20.497	15.414	8.118	27.15	32.156	24.789	53.103	4.498	17.425	33.948	38.224	29.652	8.205	10.975	16.047	10.787	15.589	5.008	0.461164
ENSG00000102900	NUP93	47.333	59.691	32.172	24.935	38.933	28.743	10.079	13.189	44.017	42.358	21.032	68.805	17.729	30.149	39.002	9.439	11.214	12.837	13.911	9.204	0.461143
ENSG00000174718	C12orf35	54.257	51.1	13.217	3.367	2.289	19.565	29.47	26.029	7.498	0.546	39.821	6.035	6.498	5.062	10.638	7.488	10.195	4.615	6.381	7.326	0.461104
ENSG00000152192	POU4F1	0.262	0.467	0.801	0.015	0.016	0.028	0.054	0.403	0.005	0	0.012	0	0.022	0.004	0.783	0.015	0.025	0.002	0	0.056	0.461073
ENSG00000180269	GPR139	0.59	0.264	0.099	0	0	0	0	0.048	0	0	0	0	0	0	0	0	0	0	0	0	0.461068
ENSG00000120696	KBTBD7	9.333	11.125	11.004	1.413	1.129	1.506	7.163	7.012	3.148	4.811	1.761	4.472	5.604	2.83	2.265	8.324	3.132	2.414	3.94	3.385	0.460905
ENSG00000053254	FOXN3	46.036	22.143	41.155	9.553	8.682	39.003	15.449	15.162	4.663	7.146	43.839	1.466	6.599	11.405	7.146	10.829	18.486	18.031	20.168	7.591	0.460876
ENSG00000224940	PRRT4	0.811	0.587	3.097	0.013	0.007	0.357	0.213	0.293	0.104	1.474	0.691	0.141	0.04	0.014	0.026	0.067	0.659	0.665	0.158	0.764	0.460815
ENSG00000198910	L1CAM	29.884	6.495	52.899	2.03	0.359	1.415	1.034	9.249	12.223	54.585	3.59	18.959	0.306	0.622	0.384	4.622	3.788	1.153	1.209	2.028	0.460802
ENSG00000176204	LRRTM4	4.851	2.364	1.723	0	0	0.001	0.044	0.514	0.002	0.009	0	0	0.002	0.01	0	1.15	0.079	0.085	0.167	0.227	0.46074
ENSG00000177181	RIMKLA	4.544	4.421	19.343	0.015	0.02	0.336	0.633	0.792	0	0.409	0.028	0.156	0.12	0.018	0.054	3.895	0.617	5.663	2.897	1.53	0.460689
ENSG00000049167	ERCC8	3.333	6.337	4.682	3.455	1.225	5.385	2.736	3.103	4.668	1.375	2.194	3.763	1.873	5.245	3.022	2.888	1.605	1.72	3.696	2.27	0.460496
ENSG00000189253	TRIM64B	0	0.011	0.011	0.026	0	0	0	0	0	0	0.018	0	0.002	0	0	0	0	0	0	0	0.460373
ENSG00000204856	C12orf24	12.369	10.102	8.3	13.007	8.155	21.347	2.138	3.253	5.307	3.032	2.998	9.645	5.03	8.061	6.598	1.904	3.303	9.708	3.459	1.421	0.460327
ENSG00000132718	SYT11	7.251	1.254	110.534	18.606	10.561	19.143	3.557	13.23	0.133	11.132	11.684	0.12	1.095	37.052	30.631	21.741	8.384	10.653	1.98	0.817	0.46011
ENSG00000167470	MIDN	88.583	83.217	73.553	69.189	81.789	60.076	57.224	57.679	7.583	40.622	122.858	14.877	73.644	10.325	17.222	54.796	49.064	29.536	32.997	59.565	0.459893
ENSG00000100038	TOP3B	8.847	7.839	10.888	8.548	7.116	6.966	5.621	6.062	4.171	6.566	9.526	4.224	4.943	1.986	10.537	2.933	6.12	3.02	3.392	10.673	0.459889
ENSG00000133243	BTBD2	45.916	67.425	187.548	124.482	111.47	67.486	59.765	54.251	18.536	211.108	53.213	25.805	11.392	13.184	68.392	41.673	59.498	40.16	57.415	61.598	0.459703
ENSG00000182242	TEX28P1	0	0	0.019	0	0	0	0	0	0	0	0	0	0	0	0	0	0.005	0	0	0	0.459662
ENSG00000189057	FAM111B	18.718	20.815	3.474	0.792	8.35	1.81	6.803	5.961	3.145	1.128	1.182	13.592	0.67	7.455	2.286	0.062	2.151	0.085	4.05	0.211	0.459637
ENSG00000164411	GJB7	0.575	0.811	0.019	0.006	0	0.166	0.055	0.068	0.006	0.005	0.215	0	0.013	0	0.008	0	0.026	0.002	0.047	0.006	0.459629
ENSG00000168152	THAP9	4.448	7.652	3.968	0.705	0.278	3.21	3.573	3.057	0.841	0.281	1.215	0.771	1.158	0.842	0.539	2.331	1.792	2.491	1.585	2.566	0.459499
ENSG00000166924	C7orf51	2.101	2.16	21.981	1.603	0.854	0.247	0.734	2.279	0.264	0.611	0.158	0.104	1.421	0.115	0.455	4.449	1.361	0.295	1.044	6.038	0.459492
ENSG00000147481	SNTG1	0.206	0.148	11.171	0.011	0	0	0.053	0.086	0	0.022	0	0	0	0.018	0.025	3.06	0.014	0	0.031	0.264	0.459377
ENSG00000130723	PRRC2B	34.112	41.324	78.085	47.744	41.581	31.749	43.443	43.502	9.622	36.941	57.649	13.359	39.338	8.272	18.943	33.126	34.514	32.135	24.415	54.664	0.459335
ENSG00000188991	SLC15A5	0.006	0	0.01	0	0	0	0	0.004	0	0	0	0	0	0	0	0	0.005	0	0	0	0.459074
ENSG00000182450	KCNK4	0.165	0.072	0.811	0.111	0.109	0.013	0.015	0.045	0.039	0.248	0.006	0.17	0.285	0.017	0.117	0.033	0.119	0.035	0.183	0.089	0.458867
ENSG00000120800	UTP20	12.408	20.488	3.497	8.48	4.734	7.845	4.941	5.238	11.033	2.201	4.323	10.148	10.512	11.032	4.133	3.436	2.577	3.287	2.326	2.591	0.45859
ENSG00000171160	MORN4	6.031	7.586	13.054	5.72	4.034	3.201	4.583	5.916	6.672	1.286	0.237	7.861	2.819	5.649	5.666	8.272	1.784	3.791	4.553	4.097	0.458518
ENSG00000100344	PNPLA3	18.208	17.031	1.751	5.611	6.056	1.967	1.88	2.207	11.68	9.698	0.938	7.652	0.936	4.836	4.669	0.922	1.015	1.355	1.855	0.674	0.458452
ENSG00000135912	TTLL4	17.785	19.042	12.614	6	7.287	4.04	5.431	6.139	7.332	16.467	6.122	13.101	17.887	3.107	8.664	4.879	4.131	2.165	3.54	8.393	0.458343
ENSG00000143401	ANP32E	54.29	92.254	22.089	11.582	8.947	50.127	30.592	29.031	10.335	7.336	17.01	9.264	15.341	18.602	5.146	11.605	21.087	25.215	22.478	11.794	0.458281
ENSG00000008294	SPAG9	8.492	11.135	50.228	12.293	7.259	16.421	19.21	18.073	15.16	3.841	14.514	10.524	26.691	14.304	6.197	11.068	14.232	14.729	8.788	14.054	0.458276
ENSG00000165186	PTCHD1	0.875	0.42	1.182	0.004	0	0	0.064	0.461	0.002	0	0.003	0	0.071	0.002	0	0.02	0.87	0.016	0.019	0.075	0.458099
ENSG00000154359	LONRF1	14.897	20.335	6.128	8.66	2.407	10.573	5.261	5.416	3.708	13.507	6.977	1.607	8.038	5.249	1.658	5.269	7.601	3.206	5.04	4.842	0.457952
ENSG00000188227	ZNF793	3.655	2.419	5.119	0.281	0.099	5.32	3.996	4.644	1.858	0	0.825	0.522	0.628	0.42	0.105	2.37	1.833	1.594	0.893	1.729	0.457808
ENSG00000122145	TBX22	0.243	0.519	0.028	0	0	0	0.055	0.022	0	0	0	0	0	0	0	0.015	0	0.006	0	0	0.457767
ENSG00000178035	IMPDH2	145.376	103.473	55.523	176.376	149.674	211.172	93.241	91.764	104.071	109.689	35.336	124.303	106.965	76.237	75.344	63.432	60.072	38.954	57.307	61.172	0.457567
ENSG00000239887	C1orf226	5.221	8.299	11.292	0.227	0.288	0.342	7.967	10.003	0.078	0.751	0.074	0.572	7.504	0.063	2.195	1.3	2.165	1.832	3.959	2.278	0.457549
ENSG00000176593	NA	3.941	1.432	5.323	1.132	0.51	4.405	2.592	3.58	1.295	0.132	0.94	0.325	2.182	0.576	1.156	2.171	1.521	1.206	0.512	2.983	0.457423
ENSG00000162769	FLVCR1	28.575	21.528	5.463	1.611	2.836	6.995	15.133	17.964	2.793	2.114	4.539	3.341	4.38	1.902	2.91	7.972	2.676	1.15	2.24	3.513	0.457233
ENSG00000008441	NFIX	0.157	0.05	214.295	60.337	101.918	12.136	5.066	8.811	4.481	34.412	2.67	10.685	20.189	21.299	3.736	16.96	43.101	29.126	43.614	17.85	0.457232
ENSG00000218823	PAPOLB	0.006	0.072	0.093	0.103	0.037	0.014	0.004	0.028	0	0.03	0	0	0.06	0.013	0.003	0	0.023	0.066	0.03	0.006	0.457187
ENSG00000105696	TMEM59L	36.349	3.943	99.769	0.527	1.342	0	0.848	7.943	0.033	0.11	0	0.054	2.734	0.152	0.618	41.332	2.389	3.309	0.401	8.435	0.456964
ENSG00000130638	ATXN10	32.335	52.247	60.077	27.29	23.954	40.567	16.305	20.231	41.156	20.061	15.497	37.358	22.84	52.11	14.775	34.891	17.65	37.019	30.347	15.351	0.456678
ENSG00000111752	PHC1	185.217	81.351	36.836	10.117	7.78	26.981	15.163	14.944	2.391	7.311	14.939	3.407	5.219	4.6	15.232	10.305	9.9	7.302	5.301	16.329	0.456584
ENSG00000120948	TARDBP	57.07	81.121	57.161	31.096	17.381	71.559	54.878	60.46	49.09	28.83	40.505	33.732	48.707	51.584	36.94	36.011	37.912	35.487	50.758	31.318	0.456522
ENSG00000198825	INPP5F	53.613	50.792	21.059	5.492	3.896	6.587	6.167	10.516	12.037	9.715	5.544	6.953	4.475	8.953	3.842	30.724	5.006	2.938	3.721	4.469	0.456364
ENSG00000174989	FBXW8	9.473	9.472	13.383	13.56	11.726	10.514	7.326	7.51	3.666	9.864	7.789	4.721	5.941	12.914	13.651	11.846	4.805	3.553	5.27	6.062	0.45617
ENSG00000100393	EP300	26.975	36.58	38.791	39.241	31.467	27.767	30.274	28.699	6.363	13.658	69.271	7	35.653	5.346	16.177	32.007	15.97	11.215	9.379	17.676	0.456024
ENSG00000205081	CXorf30	0	0.028	0.297	0	0	0.01	0.073	0.018	0.005	0	0	0	0	0	0	0.13	0	0	0	0	0.456024
ENSG00000175745	NR2F1	0.006	22.01	80.674	23.279	36.919	0	1.614	2.861	0.007	2.575	0.011	2.362	0.166	36.124	13.489	5.043	26.7	0.237	18.937	5.02	0.455558
ENSG00000180720	CHRM4	0.611	0.275	5.44	0.066	0.044	0.633	4.186	5.06	0.026	0.393	2.988	0.035	1.11	0.029	0.087	0.756	0.246	0.06	0	0.072	0.45554
ENSG00000132953	XPO4	12.027	14.806	4.468	6.637	4.002	10.246	6.835	7.424	11.315	4.098	9.654	7.545	5.644	8.605	5.536	6.701	3.541	5.324	2.966	3.525	0.45552
ENSG00000110958	PTGES3	171.332	168.407	85.293	61.139	82.388	104.092	79.417	80.446	52.475	61.335	44.654	46.154	177.181	54.578	22.545	85.599	55.092	45.306	83.221	31.215	0.455439
ENSG00000198911	SREBF2	97.283	69.357	84.371	93.994	97.847	43.73	35.846	31.336	38.806	131.131	40.83	47.088	19.309	23.97	75.853	31.926	47.979	59.332	30.686	36.94	0.4554
ENSG00000197323	TRIM33	15.667	18.885	18.578	7.778	5.424	19.806	12.854	12.229	10.315	4.769	28.092	7.731	11.151	8.146	5.86	14.542	9.051	4.703	6.369	9.365	0.455371
ENSG00000101180	HRH3	3.473	1.913	0.481	0	0	0.004	0.041	0.234	0	0.009	0.017	0	0.007	0	0.004	0.015	0.043	0	0	0.069	0.455151
ENSG00000181690	PLAG1	4.467	5.241	0.932	5.049	2.497	6.659	7.628	6.695	1.374	0.741	2.024	0.497	0.133	2.211	1.679	1.986	0.658	2.038	0.676	0.799	0.45499
ENSG00000123737	EXOSC9	17.774	21.703	7.069	6.489	6.069	15.908	7.79	9.065	7.392	1.862	11.848	8.543	10.11	9.058	5.737	5.725	6.576	6.73	7.581	5.56	0.454905
ENSG00000082497	SERTAD4	3.086	2.709	5.828	0.498	2.655	0	0.424	1.282	1.424	0.264	0	1.941	1.658	1.662	1.986	0.899	2.352	1.091	2.431	0.216	0.454895
ENSG00000138095	LRPPRC	36.47	71.879	16.302	23.244	10.568	46.862	34.728	34.039	35.963	9.493	14.464	21.843	22.37	22.928	9.84	22.294	13.664	28.151	12.503	9.074	0.454857
ENSG00000255837	TAS2R20	0.15	0.022	1.599	0.309	0.235	1.79	1.321	1.698	0.291	0.22	0.779	0.1	0.217	0.104	0.389	0.357	0.138	0.146	0	0.122	0.454829
ENSG00000149488	TMC2	0.008	0.006	1.143	0	0	0.027	0.07	0.222	0	0.005	0	0	0.002	0.005	0	0.015	0.071	0.005	0.009	0.319	0.454485
ENSG00000166342	NETO1	3.749	1.401	1.606	0.14	4.666	0.041	0.006	0.008	4.817	0.017	0.118	0.109	0.004	0.011	0	0.058	0.06	0.081	0.041	0.025	0.454379
ENSG00000143815	LBR	70.044	41.398	19.352	12.064	9.919	43.35	28.473	31.76	14.281	9.147	32.05	11.973	7.52	21.133	24.334	10.434	25.242	4.456	8.249	12.423	0.454186
ENSG00000108379	WNT3	6.467	8.505	1.072	0.615	0.542	0.032	4.723	5.288	1.668	0.376	0.39	1.827	0.518	0.71	1.724	0.443	0.719	0.481	0.287	0.807	0.454044
ENSG00000163029	SMC6	18.418	14.556	3.304	4.556	3.018	9.665	6.993	7.982	8.068	0.848	4.512	5.085	3.512	5.901	3.647	2.542	6.124	3.358	2.982	3.333	0.453928
ENSG00000168939	SPRY3	1.433	0.994	1.849	0.684	0.279	1.008	2.353	2.556	0.389	0.284	1.085	0.486	0.107	0.451	1.56	0.569	0.444	0.495	0.293	0.435	0.453511
ENSG00000178201	VN1R1	1.621	0.332	4.526	0.498	0.172	4.027	2.259	2.109	0.288	0.077	0.538	0.044	0.397	0.234	0.233	1.758	0.488	1.935	0.098	0.251	0.453445
ENSG00000117425	PTCH2	0.235	9.436	5.851	0.231	0.18	0.516	1.981	2.393	0.08	0.088	1.478	0.034	1.447	0.131	2.248	2.093	1.293	0.221	0.323	2.351	0.453369
ENSG00000133216	EPHB2	11.694	7.889	32.273	2.522	11.215	0.024	14.455	17.765	0.168	0.088	1.8	1.462	0.635	7.139	30.313	2.636	0.741	0.904	0.6	3.238	0.453366
ENSG00000175267	VWA3A	0.01	0.027	1.115	0.059	0.035	0.09	0.091	0.144	0.008	0	0.244	0.007	0.242	0.005	0.032	0.056	0.076	0.094	0.046	0.243	0.453292
ENSG00000135316	SYNCRIP	56.675	65.283	23.125	30.291	20.677	59.047	34.794	36.282	17.112	14.235	22.216	9.463	36.394	14.012	8.132	19.972	30.182	22.999	31.528	17.416	0.452899
ENSG00000116128	BCL9	17.343	27.995	21.167	7.119	7.324	5.968	20.015	18.51	2.417	10.127	3.579	2.425	18.719	2.939	4.819	22.398	7.151	5.861	4.645	6.333	0.452821
ENSG00000151665	PIGF	5.638	4.265	8.047	4.435	2.819	11.301	6.394	7.762	7.353	3.43	10.576	4.162	1.692	5.036	4.908	4.456	2.165	2.426	4.262	2.28	0.452793
ENSG00000176624	MEX3C	31.316	47.107	23.131	23.23	10.826	53.69	19.4	19.724	48.117	11.532	33.019	43.515	38.581	19.436	20.646	9.813	11.733	9.067	15.39	6.173	0.452571
ENSG00000134759	ELP2	14.407	19.665	17.669	10.649	3.841	24.555	15.977	15.768	11.081	6.105	12.897	8.447	15.165	13.618	7.005	11.814	8.851	10.17	12.005	10.463	0.452558
ENSG00000196277	GRM7	0.037	0.077	1.21	0.001	0	0.018	0.061	0.107	0	0	0.001	0.006	0.023	0	0.032	0.047	0.423	0	0	0.024	0.452476
ENSG00000001630	CYP51A1	113.334	69.547	20.851	32.413	34.992	23.286	62.804	45.946	27.739	24.32	10.143	20.116	14.368	17.899	10.767	35.761	21.88	21.792	23.001	13.31	0.452312
ENSG00000155640	C10orf12	3.27	4.672	4.771	6.016	4.409	4.672	3.783	3.284	3.381	0.901	9.074	5.189	1.884	5.149	1.126	2.695	2.323	2.519	1.208	2.52	0.452179
ENSG00000074696	PTPLAD1	204.625	133.577	54.15	35.043	33.044	31.636	60.226	60.131	62.359	46.365	8.921	57.188	29.322	65.657	44.553	82.777	18.344	8.09	26.798	8.323	0.452131
ENSG00000198477	ZNF280B	4.823	5.676	1.075	0.716	0.811	1.148	1.404	1.489	0.011	2.603	0.51	0.158	0.003	0.686	1.551	2.067	0.18	0.088	0.203	0.715	0.452104
ENSG00000198798	MAGEB3	0.011	0.087	0.012	0	0	0	0	0.004	0	0	0	0	0	0	0	0	0	0	0	0	0.452055
ENSG00000196345	ZNF167	3.669	5.268	2.832	1.503	0.459	5.439	3.959	4.243	0.922	0.328	0.446	0.603	0.979	1.422	0.441	2.573	1.462	1.083	0.813	2.578	0.451975
ENSG00000147536	GINS4	16.925	18.049	1.909	3.885	13.136	1.956	1.695	1.653	4.326	4.25	1.012	10.961	0.242	9.708	4.257	0.151	1.463	0.363	1.611	0.284	0.451854
ENSG00000164841	TMEM74	2.347	2.665	0.82	0	0.004	0.122	0.036	0.279	0.235	0.044	0	0.199	0.214	0.032	0.045	0.228	0.3	0.752	0.09	0.137	0.451844
ENSG00000154473	BUB3	78.823	72.298	46.243	58.59	54.974	42.693	35.722	39.25	71.545	32.381	40.21	93.754	26.964	70.377	64.366	23.636	23.398	20.046	36.63	14.719	0.451647
ENSG00000071539	TRIP13	20.093	24.703	7.375	16.882	28.231	2.868	3.05	3.625	13.035	16.79	0.526	26.432	1.656	13.74	12.06	0.226	2.697	0.54	4.076	0.447	0.451002
ENSG00000139146	FAM60A	98.296	88.428	10.366	4.908	2.001	41.401	21.74	19.189	15.82	5.321	12.697	11.333	24.194	3.371	7.682	14.342	7.468	4.075	15.503	6.984	0.450945
ENSG00000123200	ZC3H13	37.929	19.927	22.973	12.114	8.664	14.95	17.101	17.889	3.713	3.026	10.835	1.39	21.026	2.326	2.296	14.303	12.56	10.819	13.897	10.682	0.450915
ENSG00000167257	RNF214	10.092	11.231	17.773	13.133	7.375	15.81	9.057	10.205	5.304	3.988	6.789	5.448	7.364	6.083	10.261	11.171	5.855	5.857	6.549	15.369	0.450792
ENSG00000179361	ARID3B	60.601	70.824	7.01	3.196	2.825	6.663	5.767	6.273	2.725	1.214	22.886	3.651	3.112	0.514	5.655	4.474	3.84	1.613	4.641	5.417	0.450751
ENSG00000197020	ZNF100	8.699	6.647	3.527	0.619	0.92	7.602	4.052	3.668	1.607	0.358	2.928	1.158	1.05	1.493	1.085	3.441	2.13	1.441	1.578	2.501	0.450633
ENSG00000152595	MEPE	0.012	0.012	0.011	0	0	0	0.01	0	0	0	0	0	0	0	0	0.013	0	0	0	0	0.450631
ENSG00000206432	TMEM200C	3.963	5.744	11.23	0.211	0.075	0.033	0.068	0.412	0.001	0.038	0	0	11.254	0.07	0.006	0.336	0.561	2.86	0.269	0.04	0.450611
ENSG00000018189	RUFY3	5.629	7.238	37.638	4.803	2.037	11.239	9.244	13.381	3.198	1.319	8.253	1.696	6.547	7.798	2.714	15.133	6.95	4.705	5.263	8.081	0.450611
ENSG00000145041	VPRBP	9.014	12.167	13.453	10.557	8.785	15.348	12.039	11.523	7.647	7.084	19.052	6.889	12.09	5.895	5.577	11.66	7.024	8.158	7.202	7.38	0.450442
ENSG00000153774	CFDP1	63.98	58.975	101.057	36.816	21.51	50.486	73.59	66.624	20.943	13.473	13.791	13.512	57.748	46.669	9.959	43.015	39.964	36.419	57.362	42.337	0.450344
ENSG00000186487	MYT1L	0.012	0.022	13.268	0.001	0.001	0.001	0.033	0.814	0	0.013	0.002	0	0.018	0.002	0.003	3.465	0.024	0.002	0.02	0.74	0.4501
ENSG00000132383	RPA1	36.882	68.186	24.293	24.227	31.159	37.563	28.355	26.432	41.517	37.602	22.052	51.342	13.007	37.432	36.714	18.301	20.056	19.967	18.672	8.901	0.450045
ENSG00000172292	CERS6	31.351	17.564	77.135	8.742	6.987	31.632	41.783	31.944	15.044	4.541	18.838	16.579	17.935	5.404	2.495	43.581	6.64	37.642	8.814	5.216	0.449979
ENSG00000164323	KIAA1430	16.13	12.502	11.235	14.777	5.893	22.029	9.388	12.733	11.501	7.06	7.748	9.319	8.66	20.282	3.475	9.451	6.393	3.735	10.019	4.436	0.449963
ENSG00000076248	UNG	62.678	82.945	21.361	7.137	26.843	33.634	23.849	19.527	20.483	48.63	4.18	31.416	2.933	11.965	15.972	11.493	18.724	17.51	25.419	9.7	0.449904
ENSG00000137473	TTC29	0.147	1.055	0.068	0.007	0.008	0.369	0.067	0.036	0	0	0	0.004	0.007	0.011	0.005	0.007	0	0.017	0	0.016	0.449894
ENSG00000156574	NODAL	23.763	29.664	0.872	0.031	0	0.476	0.232	0.309	0.373	0	1.456	0.403	0	0	0	0.009	0.145	0.053	0	0.061	0.449644
ENSG00000150510	FAM124A	21.582	17.459	6.462	0.137	0.108	0.141	0.226	0.611	0.027	6.976	0.019	0.066	3.871	1.291	3.248	0.409	1.925	2.769	0.761	1.148	0.449436
ENSG00000120137	PANK3	20.903	31.498	16.912	7.624	5.788	28.96	38.563	39.266	21.453	7.767	16.758	13.414	13.788	17.238	10.777	10.793	7.527	11.823	10.151	3.82	0.449294
ENSG00000179058	C9orf50	0.006	0.074	0.318	0.11	0.044	0.243	0.212	0.323	0.009	0.047	0	0	0.037	0.083	0.02	0.01	0.148	0.039	0.08	0.016	0.449268
ENSG00000204410	MSH5	4.037	3.308	10.055	8.188	6.241	13.758	12.368	11.301	3.215	2.076	6.677	4.174	0.502	2.129	8.784	2.404	4.333	0.501	1.196	6.567	0.449171
ENSG00000163755	HPS3	13.702	20.67	5.252	6.459	5.684	14.409	12.683	11.32	6.59	8.905	9.752	7.556	1.427	15.749	4.675	6.957	4.186	2.61	6.962	3.658	0.449133
ENSG00000156650	KAT6B	5.631	5.945	36.613	9.717	4.583	17.111	6.204	6.318	0.88	0.688	17.122	0.725	3.925	1.74	2.058	16.983	5.588	5.662	6.941	6.04	0.449044
ENSG00000080845	DLGAP4	12.377	13.598	77.379	46.423	56.373	6.618	8.605	9.623	4.763	31.667	9.186	7.079	14.007	8.76	20.953	23.148	13.777	13.569	14.277	30.23	0.448989
ENSG00000103494	RPGRIP1L	4.087	4.874	3.103	2.535	1.822	3.887	2.083	2.555	5.817	0.446	0.576	4.032	1.319	5.188	1.829	3.065	0.909	0.552	1.08	0.8	0.448775
ENSG00000197123	ZNF679	0	0	0.018	0	0	0.01	0.003	0.003	0.003	0	0.014	0	0	0	0	0	0	0	0	0.005	0.448752
ENSG00000230301	OR5H6	0.068	0.09	0	0	0	0	0.015	0	0	0	0	0	0	0	0	0	0	0	0	0	0.448719
ENSG00000255152	MSH5-C6orf26	5.754	4.563	14.493	11.471	8.266	21.08	17.229	15.713	4.44	3.165	9.23	5.856	0.723	2.796	10.638	3.193	6.547	0.684	2.021	9.978	0.448641
ENSG00000127903	ZNF835	1.413	0	8.802	0.627	0.15	1.687	1.38	1.43	0.006	0.023	0.593	0	0.518	0.064	0.015	2.145	1.574	1.621	0.355	0.741	0.448611
ENSG00000211460	TSN	29.247	47.629	20.919	21.963	15.2	37.477	24.929	25.436	31.524	23.373	18.891	24.059	15.232	31.195	16.652	21.944	17.939	22.199	19.791	13.881	0.448382
ENSG00000168916	ZNF608	12.557	17.051	14.242	5.807	4.756	4.468	18.016	16.393	0.636	3.989	0.404	2.625	14.518	6.061	6.8	7.62	2.84	1.825	3.184	10.963	0.448301
ENSG00000172728	FUT10	5.154	4.648	2.162	2.581	1.964	4.498	6.518	5.244	5.321	1.773	1.331	3.306	0.891	2.31	2.309	1.628	1.638	0.984	2.661	1.804	0.448198
ENSG00000140481	CCDC33	0.064	0.246	0.049	0.004	0	0.015	0.064	0.133	0.002	0.016	0.017	0.001	0.013	0	0	0.036	0.013	0.022	0.013	0	0.448111
ENSG00000244291	C7orf13	3.304	1.204	14.527	5.818	1.77	4.233	8.596	6.374	0.205	4.389	0.099	1.076	3.058	2.468	4.871	4.062	1.785	2.026	4.548	3.436	0.447773
ENSG00000115947	ORC4	12.023	18.581	10.741	6.281	1.519	15.108	9.487	9.786	10.457	2.098	5.614	6.847	10.617	7.335	3.814	8.21	6.699	7.163	6.738	6.754	0.447626
ENSG00000054523	KIF1B	10.729	16.394	51.305	6.618	5.358	3.554	5.74	8.491	6.161	3.809	5.194	5.33	16.962	8.302	5.506	9.872	8.03	24.138	3.404	7.29	0.447495
ENSG00000163053	SLC16A14	1.422	0.952	6.315	0.038	0.012	0.623	0.791	1.16	0.517	0	0.155	0.081	0.077	1.263	0.187	0.742	2.682	0.627	0.484	0.242	0.447333
ENSG00000122482	ZNF644	17.297	23.211	10.403	5.129	3.032	13.607	14.498	13.353	6.826	2.356	8.796	5.83	19.693	7.733	2.636	7.387	6.534	6.244	7.642	4.817	0.447247
ENSG00000033867	SLC4A7	26.319	15.323	4.938	13.514	4.991	8.209	5.624	9.926	11.078	2.14	12.154	13.691	13.567	10.885	4.373	5.05	4.679	4.006	1.615	1.661	0.447163
ENSG00000174721	FGFBP3	179.103	128.097	15.375	0.97	0.505	2.477	1.052	1.261	0.093	0.916	1.293	0.109	0.274	0.258	0.122	2.521	1.124	0.269	0.66	1.812	0.447074
ENSG00000165061	ZMAT4	4.677	4.247	0.869	0.006	0	0.001	0.11	0.159	0	0	0.368	0.002	0.411	0.013	0	0.797	0.036	0.286	0.105	0.103	0.447028
ENSG00000186416	NKRF	5.276	9.867	8.063	3.964	3.83	8.886	4.805	4.912	7.806	2.82	7.379	7.156	9.508	4.885	1.984	5.248	5.028	3.201	3.065	5.341	0.446943
ENSG00000117505	DR1	14.697	24.294	19.351	23.938	19.612	38.806	21.04	21.309	19.886	15.351	21.453	18.881	18.668	21.122	12.746	12.352	12.919	17.617	22.946	5.879	0.446938
ENSG00000009844	VTA1	28.394	34.806	39.886	17.253	10.661	22.947	29.89	29.98	41.21	12.666	8.226	31.991	21.325	37.906	15.988	16.583	18.623	22.411	21.931	7.233	0.446867
ENSG00000005801	ZNF195	27.449	19.993	8.895	4.155	2.321	14.722	10.016	9.646	6.752	0.577	5.45	5.508	6.949	3.621	3.88	6.97	4.664	3.043	6.102	10.731	0.446811
ENSG00000186469	GNG2	4.461	12.429	82.492	4.215	2.411	11.115	6.25	16.893	0.107	7.199	51.288	0.379	0.07	9.19	0.006	26.645	2.06	1.611	10.865	4.437	0.446694
ENSG00000100320	RBFOX2	25.9	31.499	60.472	41.576	37.944	4.929	13.998	22.184	34.528	11.133	0.342	31.836	15.841	48.666	43.993	18.607	21.442	14.515	16.608	8.204	0.446659
ENSG00000213967	ZNF726	0.943	2.126	1.638	0.468	0.657	3.795	1.015	0.8	0.287	0.343	0.442	0.239	0.066	0.396	0.725	0.34	0.781	0.062	1.301	0.519	0.44644
ENSG00000167535	CACNB3	0.966	3.925	34.734	5.828	8.758	3.727	2.25	3.85	3.798	10.852	0.963	4.661	3.034	7.349	12.814	1.716	8.146	1.288	6.271	3.207	0.446432
ENSG00000154721	JAM2	3.07	5.218	24.102	0.632	0.134	2.495	2.04	3.827	0.006	0.017	0.076	0.007	1.793	0.752	0.163	2.189	5.727	8.252	1.269	2.072	0.446337
ENSG00000127399	LRRC61	0.257	22.368	29.996	0.147	0.1	10.007	8.731	8.711	1.051	3.325	1.825	0.607	11.081	0.032	0.418	14.788	4.358	3.481	4.884	7.61	0.446106
ENSG00000166913	YWHAB	166.387	135.08	94.084	133.842	143.059	90.722	74.889	79.277	151.077	106.321	124.03	120.979	94.981	180.68	45.129	80.53	68.312	83.885	96.664	24.877	0.445846
ENSG00000132681	ATP1A4	0.422	0.213	0.823	0.002	0	0.02	0.018	0.051	0	0.011	0.564	0	0.013	0	0	0.009	0.411	0.128	0	0.022	0.445605
ENSG00000136918	WDR38	0.01	0.024	0.348	0.01	0.008	0.029	0.007	0.012	0	0.107	0.006	0	0.014	0.007	0.035	0.047	0.049	0.049	0	0.018	0.445514
ENSG00000077097	TOP2B	49.405	74.506	79.976	16.487	10.885	180.839	49.309	52.645	23.918	6.729	39.894	11.92	34.035	26.895	9.348	31.826	24.644	29.081	30.529	12.662	0.445351
ENSG00000166091	CMTM5	0.03	0.128	4.713	0	0	0.64	0.123	0.727	0	1.17	0.82	0.005	0.019	0.009	0	0.022	0.306	1.352	0.292	0.172	0.44534
ENSG00000227124	ZNF717	2.281	0.748	0.963	1.48	0.509	2.01	1.311	1.223	1.116	0.233	0.588	0.763	0.535	0.856	0.473	1.196	0.499	0.414	0.534	0.683	0.445312
ENSG00000099256	PRTFDC1	4.861	9.182	27.33	9.306	4.932	5.548	13.285	16.195	0.975	0.316	0.492	1.2	0.617	17.588	8.844	6.729	3.6	2.498	11.558	3.075	0.445194
ENSG00000197961	ZNF121	79.783	35.457	7.296	5.833	4.817	19.833	10.621	10.579	8.916	1.053	14.351	3.905	11.395	2.057	0.947	4.72	3.702	3.882	2.367	5.186	0.445096
[truncated: 17,307 more rows]
