# Supplementary material for: Decoding the function of bivalent chromatin in development and cancer
Source: HighWire-hosted journal article supplement (doi:10.1101/gr.275736.121), 2021-10-19
Supplement: Supplemental_Table_S7.xlsx [file Supplemental_Table_S7.xlsx]

## Sheet: Mouse EpiLCs
Supplemental Table 7A. Gene promoters DNA hypermethylated in mouse EpiLCs compared to mouse ESCs, and their chromatin state in mouse ESCs
RefSeq Accession	Gene Symbol	DNA Methylation (%)		Fold Change	Chromatin State in Naïve ESCs	Promoter CpG Count
		Naïve ESCs	EpiLCs
NM_008712	Nos1	26.986	82.2423	2.97442	Bivalent	35
NM_175204	Psmb11	23.1889	66.5301	2.79178	Bivalent	33
NM_026685	Tmem174	31.1264	73.2761	2.312	Bivalent	30
NM_026639	Art4	26.7973	71.2626	2.59963	Bivalent	29
NM_016767	Batf	27.2785	66.3805	2.38275	Bivalent	27
NM_001195726	Fam181a	18.5613	52.3513	2.72739	H3K27me3-only	33
NM_001002787	Ccin	23.8142	58.5756	2.40087	H3K27me3-only	32
NM_023631	Aox4	14.0887	64.4965	4.34076	H3K27me3-only	32
NM_013875	Pde7b	27.8477	61.1977	2.15607	H3K27me3-only	31
NM_009314	Tacr2	7.32074	61.6682	7.53156	H3K27me3-only	29
NM_025766	Fam187a	20.5981	61.928	2.91359	H3K27me3-only	29
NR_029470	Gm10863	33.9713	74.6982	2.16458	H3K27me3-only	29
NM_011691	Vav1	24.1827	54.019	2.18479	H3K27me3-only	28
NM_031176	Tnxb	34.1667	71.0792	2.04965	H3K27me3-only	27
NM_001011789	Olfr222	28.8649	65.4261	2.22422	H3K27me3-only	26
NM_028788	1300002K09Rik	24.7279	52.3718	2.07447	H3K27me3-only	25
NM_010475	Hsd17b1	38.0959	77.6412	2.0115	H3K27me3-only	25
NM_023907	Foxi1	39.3297	82.4038	2.06805	H3K27me3-only	25
NM_027788	Fam83c	19.9063	73.5935	3.56799	H3K27me3-only	24
NM_145565	Sds	24.8746	51.8841	2.04386	H3K27me3-only	24
NM_178257	Il22ra1	15.7437	53.4457	3.25171	H3K27me3-only	24
NR_040717	C130083M11Rik	19.0823	50.4665	2.56278	H3K27me3-only	23
NM_011540	Tcap	24.9917	67.3032	2.62789	H3K27me3-only	22
NM_001081044	Mylk2	32.5678	69.3482	2.0957	H3K27me3-only	22
NM_173411	BC030500	21.9671	50.9486	2.26187	H3K27me3-only	21
NR_045423	Gm15997	31.644	76.4576	2.3728	H3K27me3-only	21
NM_001272041	Acta1	30.2043	62.9172	2.04834	H3K27me3-only	20
NM_133501	Ntng2	26.1767	58.8857	2.20357	H3K27me3-only	20
NR_033454	Gm5095	21.6152	51.8252	2.33583	H3K27me3-only	19
NM_011270	Rhd	26.0437	64.5939	2.42547	H3K27me3-only	19
NM_009971	Csf3	15.9517	66.6524	3.9909	H3K27me3-only	18
NM_001122603	Fcgbp	39.7684	80.7469	2.00515	H3K27me3-only	18
NM_177709	Tusc5	26.4676	56.5455	2.09503	H3K27me3-only	18
NM_008309	Htr1d	37.2314	83.0781	2.19919	H3K27me3-only	17
NM_172564	Tns4	18.7543	64.4504	3.31322	H3K27me3-only	16
NM_175367	Ston2	23.489	58.3967	2.42544	H3K27me3-only	16
NM_001079869	Hoxb3	26.9744	57.0381	2.07469	H3K27me3-only	16
NR_029559	Mir149	31.5854	74.6277	2.32091	H3K27me3-only	16
NM_177790	Zfp385c	11.4687	53.5882	4.37802	H3K27me3-only	15
NM_001271917	Nrl	34.5758	72.9246	2.07794	H3K27me3-only	15
NM_008967	Ptgir	28.1118	58.3408	2.03838	H3K27me3-only	15
NM_017378	Pcdh12	30.6619	73.7522	2.36095	H3K27me3-only	15
NR_030251	Mir483	19.1248	54.4335	2.75449	H3K27me3-only	14
NM_011789	Apc2	31.1469	63.5461	2.00785	H3K27me3-only	14
NM_008520	Ltbp3	17.1839	50.7789	2.84752	H3K27me3-only	13
NM_172899	Dmkn	21.4694	67.5683	3.05163	H3K27me3-only	13
NM_026985	1810033B17Rik	31.7824	78.6369	2.42926	H3K27me3-only	13
NM_026439	Ccdc80	25.1426	61.1366	2.37684	H3K27me3-only	13
NM_010861	Myl2	9.25643	62.8817	6.22845	H3K27me3-only	12
NR_045902	Gm11747	23.8121	65.9743	2.69926	H3K27me3-only	11
NM_133903	Spon2	28.505	84.2448	2.88917	H3K27me3-only	10
NM_133946	Nlrp6	27.2046	78.5437	2.82024	H3K27me3-only	10
NM_013459	Cfd	29.5793	62.7102	2.08344	H3K27me3-only	10
NM_001195255	Gm581	27.1611	62.7668	2.26436	H3K27me3-only	9
NM_001271422	Ager	26.2052	59.621	2.22828	H3K27me3-only	9
NM_011537	Tbx5	24.1099	62.498	2.5288	H3K27me3-only	8
NM_173008	Ssc5d	16.9543	58.3192	3.30389	H3K27me3-only	8
NM_020516	Slc16a8	36.8937	77.761	2.07847	H3K27me3-only	8
NM_001101631	Gm3285	27.2676	63.3318	2.27582	H3K27me3-only	8
NM_008519	Ltb4r1	35.4374	75.3339	2.09493	H3K27me3-only	7
NM_001161816	Gm15455	27.315	61.0676	2.19204	H3K4me3-only	39
NM_001190786	Ddx19b	24.3846	60.6427	2.42835	H3K4me3-only	35
NM_207558	Olfr750	21.1101	57.3091	2.63721	H3K4me3-only	35
NM_001013365	Osm	0.275123	58.0983	46.3471	H3K4me3-only	32
NM_009337	Tcl1	1.29479	52.2913	23.2227	H3K4me3-only	32
NR_028549	Snord37	14.4155	55.6367	3.674	H3K4me3-only	32
NR_036630	Gm1082	24.2104	65.6119	2.64223	H3K4me3-only	31
NM_031180	Klb	17.0351	55.6314	3.14006	H3K4me3-only	30
NR_030481	Mir700	19.8228	64.4087	3.14121	H3K4me3-only	30
NM_007777	Cryge	29.0296	63.8274	2.15879	H3K4me3-only	30
NM_146079	Guca1b	22.3146	52.1218	2.27848	H3K4me3-only	29
NR_033736	E330020D12Rik	5.58791	53.9953	8.34792	H3K4me3-only	29
NM_001033446	Arl14epl	2.61973	51.8329	14.5958	H3K4me3-only	28
NM_023887	Gcnt2	15.2667	53.2774	3.33671	H3K4me3-only	28
NM_145209	Oasl1	16.2986	59.4201	3.49278	H3K4me3-only	28
NM_181796	Gstp2	5.44946	51.3589	8.11834	H3K4me3-only	28
NR_035503	Mir1982	18.2337	63.9808	3.37849	H3K4me3-only	27
NR_040569	4930478L05Rik	32.8317	76.9987	2.30549	H3K4me3-only	27
NR_045342	4933411E08Rik	35.1042	72.887	2.04649	H3K4me3-only	26
NM_175114	Trak1	7.51819	53.325	6.37753	H3K4me3-only	25
NR_045190	E330017L17Rik	14.5279	74.7724	4.87977	H3K4me3-only	25
NM_019500	Cldn14	38.1513	84.6456	2.18755	H3K4me3-only	25
NM_175162	Stox2	38.215	81.7544	2.11027	H3K4me3-only	25
NM_212483	Krt42	16.3096	87.8363	5.13219	H3K4me3-only	24
NM_008290	Hsd17b2	15.6466	71.3402	4.34564	H3K4me3-only	24
NM_146011	Arhgap9	6.74381	53.9588	7.09713	H3K4me3-only	24
NR_028285	2210417A02Rik	17.6657	61.9135	3.37054	H3K4me3-only	24
NR_040299	4931408D14Rik	6.69087	53.5189	7.08878	H3K4me3-only	24
NM_013593	Mb	19.3243	77.017	3.83862	H3K4me3-only	23
NM_008382	Inhbe	13.7252	54.5342	3.77137	H3K4me3-only	23
NM_018870	Pgam2	4.76803	53.1297	9.38443	H3K4me3-only	23
NM_029799	Arrdc5	8.70316	70.5104	7.3698	H3K4me3-only	23
NR_002844	Tsix	5.18105	50.4301	8.32062	H3K4me3-only	23
NR_015511	E030011O05Rik	10.1777	59.6731	5.42804	H3K4me3-only	23
NM_001005508	Arhgap30	30.6807	67.0289	2.14733	H3K4me3-only	23
NR_029749	Mir93	21.61	78.6288	3.52183	H3K4me3-only	22
NR_039574	Mir5114	11.7572	77.8569	6.18137	H3K4me3-only	22
NM_001083905	Fetub	2.83581	56.8256	15.0752	H3K4me3-only	22
NR_029737	Mir20a	13.2	52.1933	3.74602	H3K4me3-only	22
NM_182992	Mypn	37.5864	79.66	2.09037	H3K4me3-only	22
NM_010816	Morc1	25.0948	71.2899	2.77028	H3K4me3-only	22
NR_029658	Mir106b	24.4973	78.1057	3.10251	H3K4me3-only	21
NM_024228	Gdpd3	13.4438	64.0398	4.50294	H3K4me3-only	21
NM_028838	Lrrc2	2.96542	56.5794	14.5204	H3K4me3-only	21
NM_029002	Nkx6-3	9.1127	69.6551	6.98676	H3K4me3-only	21
NM_031252	Il23a	16.795	59.5491	3.4026	H3K4me3-only	21
NM_177099	Lefty2	3.31393	58.566	13.8078	H3K4me3-only	21
NM_177816	Sh2d4b	3.37614	63.1215	14.6525	H3K4me3-only	21
NR_028567	Snord1b	7.59639	70.9526	8.3701	H3K4me3-only	21
NM_016668	Bhmt	36.1234	80.6519	2.19947	H3K4me3-only	21
NM_133204	Zscan5b	33.3674	77.7674	2.29192	H3K4me3-only	21
NM_009619	Adam3	28.5117	63.613	2.1894	H3K4me3-only	21
NM_028279	Naalad2	28.1373	58.1236	2.02913	H3K4me3-only	21
NM_010769	Matn1	21.1643	72.0886	3.29758	H3K4me3-only	20
NM_022988	Nif3l1	21.4265	69.0377	3.12299	H3K4me3-only	20
NM_146064	Soat2	21.4564	56.1725	2.54594	H3K4me3-only	20
NR_029815	Mir19b-1	14.7567	56.4792	3.64791	H3K4me3-only	20
NR_045913	Gm14873	17.3719	54.3824	3.01452	H3K4me3-only	20
NR_029743	Mir26b	28.4242	76.0648	2.61909	H3K4me3-only	20
NR_028570	Snord1a	9.38051	75.0305	7.32435	H3K4me3-only	19
NM_001003893	Masp2	23.0902	73.3192	3.08504	H3K4me3-only	19
NM_001164708	Hspb2	17.508	61.2328	3.36248	H3K4me3-only	19
NM_001271993	Fut2	24.1719	70.5601	2.84286	H3K4me3-only	19
NM_009649	Akap2	19.6147	56.1006	2.7699	H3K4me3-only	19
NM_010877	Ncf2	16.7164	71.9548	4.11792	H3K4me3-only	19
NM_013690	Tek	8.77947	52.8593	5.50739	H3K4me3-only	19
NM_023517	Tnfsf13	19.5412	55.0638	2.72933	H3K4me3-only	19
NM_144869	BC021614	4.28313	61.9402	11.9134	H3K4me3-only	19
NR_029585	Mir199a-1	20.4407	58.5305	2.77652	H3K4me3-only	19
NR_030675	D730005E14Rik	0.608344	50.9995	32.3311	H3K4me3-only	19
NR_033568	9430041J12Rik	19.8569	59.4566	2.89864	H3K4me3-only	19
NM_026316	Aldh3b1	35.1301	74.393	2.08671	H3K4me3-only	19
NM_001145972	Gpr114	12.9515	75.0344	5.44989	H3K4me3-only	18
NM_001033452	Accsl	8.43162	55.906	6.03354	H3K4me3-only	18
NM_001039365	Mobp	8.7006	64.4804	6.75014	H3K4me3-only	18
NM_001163138	Card6	19.0029	51.9311	2.64617	H3K4me3-only	18
NM_027320	Ifi35	4.64138	51.2477	9.26151	H3K4me3-only	18
NM_194344	Sh3tc1	12.2665	58.6251	4.4944	H3K4me3-only	18
NR_030442	Mir677	6.2896	59.1171	8.24697	H3K4me3-only	18
NM_001195710	Tmem95	30.0505	84.8223	2.76396	H3K4me3-only	18
NM_173425	Fam124b	31.2463	81.7904	2.56744	H3K4me3-only	18
NM_001081394	Tmem248	4.75711	64.1498	11.3164	H3K4me3-only	17
NM_001145875	Adtrp	7.08568	73.6335	9.23032	H3K4me3-only	17
NM_009515	Was	22.2924	72.7023	3.16422	H3K4me3-only	17
NM_022879	Myl7	21.16	74.0807	3.38811	H3K4me3-only	17
NM_023508	Pdcl2	17.3513	61.766	3.42024	H3K4me3-only	17
NM_148942	Serpinb6c	1.94788	56.8765	19.6333	H3K4me3-only	17
NR_002902	Snora62	6.85984	52.4476	6.80008	H3K4me3-only	17
NR_004417	Snord73a	5.67491	69.228	10.5212	H3K4me3-only	17
NR_040284	Gm12228	14.4467	62.578	4.11595	H3K4me3-only	17
NR_028528	Snord57	17.6605	80.3761	4.36088	H3K4me3-only	16
NM_009023	Rapsn	6.73884	65.2915	8.56608	H3K4me3-only	16
NM_144890	Bpifb5	10.5906	50.8454	4.47306	H3K4me3-only	16
NM_173427	Klhdc7a	30.3343	69.9737	2.26505	H3K4me3-only	16
NR_002173	Snord15b	15.4034	78.4718	4.84484	H3K4me3-only	15
NR_029787	Mir25	20.1377	78.2461	3.74904	H3K4me3-only	15
NM_008501	Lif	12.6503	69.1414	5.13844	H3K4me3-only	15
NM_145448	9030617O03Rik	14.3714	72.2412	4.76479	H3K4me3-only	15
NM_145932	Slc51a	15.3373	65.1501	4.04902	H3K4me3-only	15
NR_015614	E230029C05Rik	10.6319	65.127	5.68496	H3K4me3-only	15
NR_045001	Gm6936	22.0053	64.9545	2.86693	H3K4me3-only	15
NM_177611	Psd4	36.0885	79.2486	2.16371	H3K4me3-only	15
NM_199015	Phf11d	12.3829	78.1086	5.91115	H3K4me3-only	14
NM_009274	Srpk2	18.4579	71.6722	3.73485	H3K4me3-only	14
NM_009964	Cryab	17.3499	59.0939	3.27488	H3K4me3-only	14
NM_010168	F2	5.86246	71.1559	10.5146	H3K4me3-only	14
NM_027366	Ly6g6e	1.57482	55.1599	21.8112	H3K4me3-only	14
NR_029816	Mir92-1	15.89	56.9219	3.42935	H3K4me3-only	14
NR_046065	Gm13580	1.35197	59.3647	25.6656	H3K4me3-only	14
NR_028282	Snord83b	5.42499	76.9117	12.1264	H3K4me3-only	13
NM_001122954	Pla2g5	10.2033	55.471	5.04059	H3K4me3-only	13
NM_001163269	Lpar5	6.09947	66.835	9.55494	H3K4me3-only	13
NM_008243	Mst1	16.4297	69.7594	4.05971	H3K4me3-only	13
NM_008816	Pecam1	18.006	73.0167	3.89438	H3K4me3-only	13
NM_027819	Ggt6	4.97951	56.622	9.63658	H3K4me3-only	13
NM_028104	Ppp1r14d	4.83038	74.31	12.9168	H3K4me3-only	13
NM_028261	Tmem173	9.57309	53.9191	5.19423	H3K4me3-only	13
NM_175148	2300002M23Rik	18.7004	58.775	3.0342	H3K4me3-only	13
NM_178656	Pirt	23.7081	53.0992	2.18953	H3K4me3-only	13
NM_194059	Nanos3	6.77001	54.9098	7.19559	H3K4me3-only	13
NR_029382	Mir17hg	15.89	56.9219	3.42935	H3K4me3-only	13
NR_037979	Gm1631	1.78206	52.6669	19.2903	H3K4me3-only	13
NM_053108	Glrx	29.5682	78.813	2.61098	H3K4me3-only	13
NM_001159544	Frk	26.5945	65.2969	2.40254	H3K4me3-only	13
NM_008339	Cd79b	20.0984	80.4222	3.85916	H3K4me3-only	12
NM_009008	Rac2	18.9016	83.5159	4.24669	H3K4me3-only	12
NM_001039080	Rbms2	22.3829	58.8067	2.55771	H3K4me3-only	12
NM_001126320	Gm11563	11.33	73.6291	6.05263	H3K4me3-only	12
NM_001271456	Tnip1	5.53159	60.6554	9.43957	H3K4me3-only	12
NM_008788	Pcolce	3.85865	51.3405	10.7726	H3K4me3-only	12
NM_025429	Serpinb1a	3.55478	54.1753	12.1137	H3K4me3-only	12
NM_001160412	Triml2	31.4411	81.6891	2.5489	H3K4me3-only	12
NM_011461	Spic	9.90317	84.3563	7.82857	H3K4me3-only	11
NR_029821	Mir181c	2.68943	75.2461	20.6661	H3K4me3-only	11
NR_030534	Mir181d	2.74679	75.4061	20.3924	H3K4me3-only	11
NM_001033669	Fbxw10	11.0663	58.9407	4.9676	H3K4me3-only	11
NM_001081280	Nlrc3	4.47631	63.915	11.8538	H3K4me3-only	11
NM_001113478	Frrs1	3.89804	73.3262	15.1747	H3K4me3-only	11
NM_008183	Gstm2	15.4676	57.7477	3.56746	H3K4me3-only	11
NM_009855	Cd80	23.0529	66.4241	2.80315	H3K4me3-only	11
NM_010929	Notch4	0.708798	60.159	35.7906	H3K4me3-only	11
NM_178394	Jakmip1	2.80398	63.8585	17.0502	H3K4me3-only	11
NR_028558	Snora41	12.3135	59.0562	4.51092	H3K4me3-only	11
NM_016749	Mybph	37.2396	80.5538	2.1327	H3K4me3-only	11
NM_019750	Nat6	26.7403	62.7116	2.29672	H3K4me3-only	11
NM_001037713	Xaf1	3.77213	70.7233	15.0296	H3K4me3-only	10
NM_021610	Gpa33	16.2247	68.2226	4.0188	H3K4me3-only	10
NM_026205	Rnf151	13.5025	51.0749	3.59075	H3K4me3-only	10
NR_035423	Mir1192	9.58989	61.806	5.93075	H3K4me3-only	10
NM_001243138	Gm13247	26.4066	65.4268	2.42375	H3K4me3-only	10
NM_001253802	Gm5480	29.125	61.8057	2.08484	H3K4me3-only	10
NR_029526	Mirlet7g	16.3054	76.3196	4.46795	H3K4me3-only	9
NM_001177320	Tfpi	15.8433	55.6132	3.36116	H3K4me3-only	9
NM_007470	Apod	19.5922	67.8244	3.34225	H3K4me3-only	9
NM_178260	Kiss1	5.37898	69.9019	11.1149	H3K4me3-only	9
NR_028572	Snora43	5.42266	52.4327	8.3194	H3K4me3-only	9
NR_045293	D630045M09Rik	21.1014	67.5261	3.10054	H3K4me3-only	9
NM_001014397	Gm13154	26.1989	56.7242	2.1223	H3K4me3-only	9
NR_028481	Snora31	22.7178	67.5749	2.89129	H3K4me3-only	8
NR_045972	Gm16938	1.56729	68.1819	26.9474	H3K4me3-only	8
NM_023113	Aspa	26.3435	73.8654	2.73796	H3K4me3-only	8
NM_001111099	Cdkn1a	9.22234	64.563	6.4137	H3K4me3-only	7
NM_013563	Il2rg	16.9894	67.6579	3.81656	H3K4me3-only	7
NR_003492	2210409E12Rik	21.2234	67.3819	3.07702	H3K4me3-only	7
NR_030487	Mir706	11.9178	69.795	5.48043	H3K4me3-only	7
NR_039557	Mir5098	5.69243	51.0011	7.77014	H3K4me3-only	7
NR_040640	0610043K17Rik	20.5221	72.8264	3.43027	H3K4me3-only	7
NM_183278	Fam25c	26.3029	82.6236	3.06281	H3K4me3-only	7
NM_001033374	Gm694	12.1704	77.9799	5.99679	H3K4me3-only	6
NM_001205286	Tmem39a	0.530234	55.6155	36.998	H3K4me3-only	6
NM_008767	Slc22a18	21.3529	55.9813	2.54917	H3K4me3-only	6
NR_040317	A730082K24Rik	18.4754	54.2444	2.83662	H3K4me3-only	6
NR_040658	C330046G13Rik	25.2244	76.6101	2.95947	H3K4me3-only	6
NM_010730	Anxa1	27.0378	72.6312	2.62614	H3K4me3-only	6
NM_175467	Sptlc3	31.0839	71.4909	2.25942	H3K4me3-only	6
NR_039541	Mir3096b	29.5116	66.3165	2.20626	H3K4me3-only	6
NR_028536	Snord93	29.5116	66.3165	2.20626	H3K4me3-only	5
NR_033168	Snora28	15.7296	75.2027	4.55495	H3K4me3-only	4
NM_001004153	AU018091	11.1516	60.9883	5.10124	H3K4me3-only	4
NR_028523	Snord19	24.2559	72.4002	2.90626	H3K4me3-only	4
NM_173771	4933406M09Rik	10.9455	84.5215	7.15929	H3K4me3-only	2
NM_001081471	Mettl7a3	31.8978	68.3118	2.10688	Unmarked	36
NM_008955	Rhox6	13.0629	62.0695	4.48482	Unmarked	32
NM_027384	Tet1	19.4629	68.4788	3.39535	Unmarked	32
NR_033605	1700028B04Rik	38.6228	79.3242	2.02722	Unmarked	32
NM_008306	Ndst1	27.0773	72.3931	2.61397	Unmarked	32
NM_207131	Cebpe	31.6863	67.5086	2.09594	Unmarked	31
NM_021053	Slc46a2	22.5751	53.6264	2.31712	Unmarked	30
NM_080468	Rxfp2	24.911	66.1167	2.59028	Unmarked	30
NM_001122993	B3galt5	12.5608	65.3898	4.89571	Unmarked	29
NM_028971	Lrrc71	22.7333	58.1623	2.4928	Unmarked	29
NR_040420	Gm6568	8.94522	51.4305	5.27193	Unmarked	29
NM_026328	Reg4	31.1394	78.9205	2.48669	Unmarked	29
NM_029974	Dcst1	30.3251	75.6492	2.44689	Unmarked	29
NM_012016	Ern2	24.4946	50.7424	2.02954	Unmarked	28
NM_026701	Pbld1	19.3411	52.8399	2.64686	Unmarked	28
NM_053110	Gpnmb	15.0513	50.2824	3.19491	Unmarked	28
NM_146242	Lrrc10	16.2688	50.2169	2.96586	Unmarked	28
NR_045865	9230009I02Rik	20.3743	58.2054	2.76993	Unmarked	28
NM_029383	Cldn22	10.5606	67.3865	5.91546	Unmarked	27
NM_177696	Gdpd4	20.1201	50.9791	2.46112	Unmarked	27
NR_040753	4930593C16Rik	7.94198	70.6482	8.01256	Unmarked	27
NM_138304	Calml4	32.7824	71.6044	2.14918	Unmarked	27
NM_010663	Krt17	12.442	61.7477	4.66804	Unmarked	26
NM_013479	Bcl2l10	17.749	51.0076	2.77388	Unmarked	26
NM_153408	Neurl3	12.0683	60.0825	4.6741	Unmarked	26
NR_045322	Gm19557	31.147	87.088	2.74016	Unmarked	26
NM_001253831	Atp2c1	33.055	69.8935	2.08173	Unmarked	26
NM_027570	Ldhd	25.3345	59.5543	2.29943	Unmarked	26
NM_010401	Hal	19.942	79.6031	3.84886	Unmarked	25
NM_033373	Krt23	17.4882	81.6737	4.4717	Unmarked	25
NR_045875	8430403D17Rik	14.654	79.1905	5.12269	Unmarked	25
NM_007827	Daf2	24.5985	56.7947	2.25774	Unmarked	25
NR_046016	C330024C12Rik	2.18049	54.8591	17.5631	Unmarked	25
NM_001024850	Rhox10	36.4347	75.0323	2.03106	Unmarked	25
NM_023256	Krt20	35.3792	73.7363	2.05437	Unmarked	25
NM_198598	Rhox11	32.9976	69.0487	2.0604	Unmarked	25
NM_010791	Meox1	18.2638	75.3883	3.96537	Unmarked	24
NM_001271412	Nfam1	23.786	69.1771	2.83132	Unmarked	24
NM_027677	Gpr39	18.4667	53.2672	2.7877	Unmarked	24
NM_177213	Abca15	16.0497	53.468	3.19466	Unmarked	24
NR_027801	Gm1141	21.6961	51.266	2.30287	Unmarked	24
NM_001163695	4932438H23Rik	34.7923	77.7547	2.20033	Unmarked	24
NM_153384	Clrn1	36.5707	77.7408	2.0958	Unmarked	24
NM_021285	Myl1	32.7883	71.2202	2.13743	Unmarked	24
NM_153074	Lrrc25	29.0896	60.8858	2.05672	Unmarked	24
NM_001099917	2210404O07Rik	16.5866	59.8372	3.45929	Unmarked	23
NM_009776	Serping1	15.1918	66.8075	4.18777	Unmarked	23
NM_011061	Padi4	11.0168	66.3502	5.60467	Unmarked	23
NM_011704	Vnn1	7.86343	52.604	6.04777	Unmarked	23
NM_172628	Sh3tc2	24.7819	64.223	2.5298	Unmarked	23
NM_201370	Wee2	23.7268	66.3952	2.7256	Unmarked	23
NR_033467	Gm11468	18.0941	70.76	3.75824	Unmarked	23
NR_040483	9530026F06Rik	16.9764	59.5304	3.36722	Unmarked	23
NM_001033267	Qrich2	25.1742	78.8849	3.05204	Unmarked	23
NM_001163189	Enthd1	34.7299	78.7491	2.232	Unmarked	23
NM_177075	Fndc9	39.0067	81.4788	2.06162	Unmarked	23
NR_045898	4930542H20Rik	31.2535	82.9545	2.60296	Unmarked	23
NM_001080940	Gm6484	26.9972	73.8317	2.67283	Unmarked	23
NM_001081243	Filip1	28.2102	60.5894	2.10849	Unmarked	23
NM_183000	Asic3	27.0816	55.3474	2.00656	Unmarked	23
NM_001034871	Clpsl2	12.511	57.1253	4.30207	Unmarked	22
NM_001039560	Gcnt7	17.629	70.7403	3.851	Unmarked	22
NM_001146200	Pik3cg	24.1949	64.0183	2.58061	Unmarked	22
NM_001168405	Ankrd55	16.1464	64.5288	3.82172	Unmarked	22
NM_001194940	Dlc1	24.7932	59.1582	2.33233	Unmarked	22
NM_007956	Esr1	14.9987	59.2474	3.76578	Unmarked	22
NM_007994	Fbp2	20.2247	61.1042	2.92603	Unmarked	22
NM_029310	Fabp12	22.2566	73.0491	3.184	Unmarked	22
NR_015543	2810055G20Rik	22.8657	67.8585	2.88525	Unmarked	22
NR_027478	Gm8580	16.2849	63.6705	3.74145	Unmarked	22
NM_001163317	Clrn2	35.3113	78.3385	2.18495	Unmarked	22
NM_181543	Gpr151	37.581	81.8431	2.14725	Unmarked	22
NM_001144855	Ppfia4	29.9981	63.3167	2.07486	Unmarked	22
NM_008109	Gdf5	28.5164	63.0602	2.17032	Unmarked	22
NM_011850	Nr0b2	30.2026	64.7903	2.10849	Unmarked	22
NM_029937	Nup210l	33.946	72.4292	2.10122	Unmarked	22
NR_033639	Rps19-ps3	33.8675	69.2862	2.01581	Unmarked	22
NM_144942	Csad	22.9319	82.5832	3.49254	Unmarked	21
NM_001033378	A430078G23Rik	12.4721	62.818	4.73705	Unmarked	21
NM_001080934	Slc16a5	18.11	74.7515	3.96398	Unmarked	21
NM_001161842	Il18r1	13.5721	56.4907	3.94527	Unmarked	21
NM_009814	Casq2	5.97463	55.1069	8.04442	Unmarked	21
NM_010128	Emp1	21.9232	70.581	3.12264	Unmarked	21
NM_028529	Nipsnap3a	16.1064	51.4472	3.06594	Unmarked	21
NM_053077	Slc45a2	24.5858	67.5916	2.68085	Unmarked	21
NM_133226	Pdzd3	6.03619	73.35	10.5668	Unmarked	21
NM_145419	Hkdc1	17.1643	58.6714	3.28509	Unmarked	21
NM_201256	Eif4ebp3	18.9734	55.3172	2.81961	Unmarked	21
NR_035433	Mir1897	15.3501	50.8362	3.1704	Unmarked	21
NR_038130	4930474N09Rik	15.8711	57.5921	3.47292	Unmarked	21
NR_040695	1700126H18Rik	17.2361	68.113	3.7899	Unmarked	21
NM_001025086	Rhox7	32.3757	79.5877	2.41456	Unmarked	21
NM_001081096	Fam154a	25.4994	84.2943	3.21872	Unmarked	21
NM_028562	1700080E11Rik	39.5754	81.6124	2.03602	Unmarked	21
NM_028977	Lrrc17	30.762	76.7113	2.44667	Unmarked	21
NM_030166	Galnt15	33.3761	78.685	2.31803	Unmarked	21
NR_037973	Gm20597	38.727	85.4356	2.17574	Unmarked	21
NR_037984	Gm19461	39.8313	83.0888	2.05942	Unmarked	21
NR_045081	3300005D01Rik	29.7559	78.0231	2.56936	Unmarked	21
NM_001253890	Prkar1b	30.4653	62.4942	2.01791	Unmarked	21
NM_008141	Gnat2	29.1137	70.9883	2.39055	Unmarked	21
NM_175456	Abra	25.9846	70.1958	2.63839	Unmarked	21
NM_001033131	Krtdap	22.4453	67.7185	2.93102	Unmarked	20
NM_001204916	H60c	24.7573	63.0856	2.48806	Unmarked	20
NM_011924	Avpr1b	16.4392	50.4959	2.95289	Unmarked	20
NM_024412	Clcnka	19.8612	58.4796	2.85121	Unmarked	20
NR_029720	Mir192	14.0556	74.9247	5.04294	Unmarked	20
NR_045917	Gm15008	17.7422	52.3639	2.84726	Unmarked	20
NR_046062	Gm10640	5.61243	51.2378	7.89994	Unmarked	20
NM_011725	Xlr	37.3081	76.8659	2.03262	Unmarked	20
NM_021486	Bcmo1	38.0527	80.7162	2.09246	Unmarked	20
NR_045502	4921511C10Rik	33.6898	75.5984	2.2081	Unmarked	20
NR_045739	D330022K07Rik	37.2145	81.4979	2.15881	Unmarked	20
NM_001081258	Kif14	27.9668	69.7857	2.44369	Unmarked	20
NM_001082553	Rab27b	29.1376	62.3658	2.10254	Unmarked	20
NM_001253874	Itgal	31.0629	67.3119	2.13056	Unmarked	20
NM_013486	Cd2	34.019	74.2587	2.14908	Unmarked	20
NM_025949	Rps6ka6	26.504	67.5522	2.49245	Unmarked	20
NR_045499	2210416O15Rik	28.4141	59.4805	2.05618	Unmarked	20
NR_045747	Gm10872	33.0172	72.7475	2.16795	Unmarked	20
NR_045427	1810013A23Rik	17.6938	75.4149	4.08771	Unmarked	19
NM_001080781	1700029H14Rik	21.2796	56.7903	2.59386	Unmarked	19
NM_008496	Lgals7	13.6011	60.5366	4.21453	Unmarked	19
NM_011854	Oasl2	22.2433	64.4436	2.81559	Unmarked	19
NM_013530	Gnb3	22.715	57.7974	2.47934	Unmarked	19
NM_019436	Sit1	18.3339	56.4227	2.97005	Unmarked	19
NM_028637	1110034G24Rik	3.46808	62.1238	14.1277	Unmarked	19
NM_029360	Tm4sf5	11.263	66.7955	5.52846	Unmarked	19
NM_029858	Ston1	17.9027	71.424	3.83142	Unmarked	19
NM_031168	Il6	18.488	53.5369	2.79849	Unmarked	19
NM_134154	Slc25a45	21.3605	55.5996	2.53123	Unmarked	19
NM_177321	Mia2	21.3639	54.9637	2.50242	Unmarked	19
NR_038014	Gm17745	8.97013	68.6583	6.9867	Unmarked	19
NR_045707	Gm7457	20.4013	51.4843	2.45238	Unmarked	19
NM_001033316	Ffar3	35.1654	79.9967	2.23962	Unmarked	19
NM_001081337	Sipa1l2	35.5913	86.257	2.38464	Unmarked	19
NM_001100184	Cyp2t4	40.7098	83.3725	2.02284	Unmarked	19
NM_008424	Kcne1	38.9378	79.0137	2.00346	Unmarked	19
NM_028660	Klk9	34.8066	82.769	2.33949	Unmarked	19
NM_145365	Creb3l3	34.568	78.3985	2.2323	Unmarked	19
NM_007782	Csf3r	30.2368	68.4004	2.22175	Unmarked	19
NM_009645	Aicda	25.4826	54.6038	2.09964	Unmarked	19
NM_010609	Kcnk7	32.1021	74.9633	2.29482	Unmarked	19
NM_011364	Sh2d1a	27.6595	63.6837	2.25697	Unmarked	19
NM_011652	Ttn	31.1839	74.7757	2.35446	Unmarked	19
NM_019459	Nphs1	30.5315	66.9263	2.15424	Unmarked	19
NM_172966	Sh3rf2	31.8311	74.4601	2.29844	Unmarked	19
NR_029820	Mir181b-1	33.4499	74.0591	2.17879	Unmarked	19
NR_040563	Gm10560	27.1564	69.4237	2.50116	Unmarked	19
NM_028967	Batf2	23.6874	82.105	3.36629	Unmarked	18
NM_001005422	Stmnd1	18.9633	56.1513	2.86282	Unmarked	18
NM_001080776	Gm1123	19.4806	54.2615	2.69824	Unmarked	18
NM_008998	Rab17	9.13518	68.5305	6.86031	Unmarked	18
NM_009347	Tecta	8.4171	70.6705	7.61068	Unmarked	18
NM_009809	Casp14	16.5127	61.7968	3.58579	Unmarked	18
NM_010113	Egf	22.5131	60.9742	2.63573	Unmarked	18
NM_010427	Hgf	24.737	56.636	2.23942	Unmarked	18
NM_016758	Rgs14	21.8104	64.0006	2.84961	Unmarked	18
NM_029953	Arhgef38	19.1367	55.7419	2.81784	Unmarked	18
NM_145535	Sdcbp2	4.05777	56.4328	11.3553	Unmarked	18
NM_170729	Ank3	24.1301	64.8911	2.622	Unmarked	18
NM_176940	Nwd1	22.8275	67.7411	2.88495	Unmarked	18
NR_029563	Mir153	13.6559	68.1901	4.72099	Unmarked	18
NR_030436	Mir759	15.1597	72.7496	4.56379	Unmarked	18
NM_001025311	St6galnac6	33.7207	85.5815	2.49365	Unmarked	18
NM_008362	Il1r1	41.3837	83.9022	2.00318	Unmarked	18
NM_025752	4933411K16Rik	35.5414	75.14	2.08366	Unmarked	18
NM_177868	Fhad1	37.9899	79.7982	2.07229	Unmarked	18
NR_046034	4921508A21Rik	32.6726	76.2502	2.29416	Unmarked	18
NM_001033185	1700084C01Rik	30.6494	67.4375	2.16236	Unmarked	18
NM_001195094	Ccdc42b	31.0555	70.2267	2.22198	Unmarked	18
NM_001195693	Plscr5	26.9097	63.5496	2.3128	Unmarked	18
NM_009406	Tnni3	30.5813	72.353	2.32267	Unmarked	18
NM_024449	Sost	28.6221	72.2574	2.47306	Unmarked	18
NM_025458	Tmed6	25.3258	55.0606	2.12949	Unmarked	18
NM_026671	Lypd2	25.726	69.9994	2.65656	Unmarked	18
NM_029674	Got1l1	27.1503	60.9765	2.20163	Unmarked	18
NM_139130	Coro6	33.1158	68.2548	2.02999	Unmarked	18
NM_182805	Gpt	27.8794	64.435	2.26581	Unmarked	18
NR_045793	Gm10390	27.4995	67.0836	2.38894	Unmarked	18
NR_029531	Mir27b	5.30123	80.4226	12.9217	Unmarked	17
NM_001013019	Lrrn4cl	14.0156	52.415	3.55731	Unmarked	17
NM_001033459	Lrcol1	13.3022	53.5871	3.81669	Unmarked	17
NM_001081157	Lmod3	12.6235	71.5471	5.32513	Unmarked	17
NM_001159577	Lnx1	12.7956	61.5822	4.53639	Unmarked	17
NM_001162878	Fam183b	13.4484	55.0556	3.87972	Unmarked	17
NM_007914	Ehf	24.0852	63.9218	2.58805	Unmarked	17
NM_009151	Selplg	24.6768	63.6669	2.51849	Unmarked	17
NM_009257	Serpinb5	19.1663	63.9551	3.22097	Unmarked	17
NM_009985	Ctsw	11.2955	52.3214	4.33666	Unmarked	17
NM_013868	Hspb7	8.34783	66.2187	7.19084	Unmarked	17
NM_020049	Slc6a14	12.5281	52.0045	3.91809	Unmarked	17
NM_023386	Rtp4	20.6845	56.0301	2.62999	Unmarked	17
NM_031367	Ifi44l	22.5032	62.6693	2.70896	Unmarked	17
NM_144905	6330416G13Rik	15.8691	68.4759	4.11853	Unmarked	17
NM_145592	Dkk4	23.9733	68.5119	2.78346	Unmarked	17
NM_172801	Otop2	17.825	65.2068	3.51695	Unmarked	17
NM_177036	Ceacam19	18.8526	60.0146	3.07338	Unmarked	17
NM_181853	Trim66	14.261	74.6295	4.95575	Unmarked	17
NR_015494	4930511M06Rik	15.087	50.4025	3.19529	Unmarked	17
NR_027961	9130230L23Rik	2.26384	51.3576	16.0417	Unmarked	17
NR_029750	Mir96	8.29525	61.1427	6.68543	Unmarked	17
NR_029830	Mir194-2	16.4111	74.8189	4.35463	Unmarked	17
NR_030713	Mir183	10.4894	65.4155	5.78059	Unmarked	17
NR_038165	0610005C13Rik	1.73929	51.2192	19.0631	Unmarked	17
NR_045358	4930556N09Rik	18.4776	69.5512	3.62218	Unmarked	17
NM_001013780	Slc25a34	36.7609	81.9606	2.197	Unmarked	17
NM_001040426	Thsd4	36.6563	85.7894	2.30477	Unmarked	17
NM_001099295	1700042G07Rik	36.7233	81.0963	2.17628	Unmarked	17
NM_009999	Cyp2b10	30.0888	75.6417	2.46525	Unmarked	17
NM_021517	Pdzk1	32.304	83.2036	2.52833	Unmarked	17
NM_030016	Trmt13	36.9961	82.0525	2.18581	Unmarked	17
NM_080450	Gjc3	38.0621	79.9028	2.07113	Unmarked	17
NM_145598	Nxnl1	30.4847	77.1131	2.48099	Unmarked	17
NM_172810	Gucy1b2	31.8615	80.0046	2.46503	Unmarked	17
NM_177371	Tnfsf15	34.3696	76.3191	2.18603	Unmarked	17
NR_034042	Snora5c	44.0643	89.6881	2.01241	Unmarked	17
NR_037296	Mir3109	39.4234	87.2052	2.18203	Unmarked	17
NM_138741	Sdpr	27.5292	69.8116	2.48207	Unmarked	17
NM_183032	Rnase9	28.8222	71.3569	2.42628	Unmarked	17
NR_029795	Mir181a-1	30.9846	72.4372	2.29602	Unmarked	17
NR_045809	4930527F14Rik	32.7007	66.4382	2.00109	Unmarked	17
NM_001025103	Efcab4a	20.1694	63.1976	3.03257	Unmarked	16
NM_001081053	Itga10	23.9238	51.275	2.09739	Unmarked	16
NM_001160265	Cyp2w1	8.03362	74.0062	8.30301	Unmarked	16
NM_001164640	Apol7a	24.6333	53.642	2.13168	Unmarked	16
NM_001199244	Kcnip4	24.1084	57.5056	2.33012	Unmarked	16
NM_010359	Gstm3	13.0464	50.6786	3.67914	Unmarked	16
NM_013641	Ptger1	14.0325	52.4367	3.55475	Unmarked	16
NM_030239	Abcg3	23.7275	54.9062	2.2609	Unmarked	16
NM_030677	Gpx2	2.42786	56.037	16.6393	Unmarked	16
NM_032465	Cd96	22.6178	68.9685	2.96254	Unmarked	16
NM_133712	Klk10	1.62635	57.9747	22.455	Unmarked	16
NM_197986	Tmem140	17.4594	66.1333	3.63681	Unmarked	16
NR_029569	Mir182	12.0304	58.6416	4.57711	Unmarked	16
NR_040760	AU023762	17.1158	55.4729	3.11734	Unmarked	16
NR_045717	C330022C24Rik	14.0256	64.4757	4.35762	Unmarked	16
NR_045866	Gm6116	9.12656	70.4535	7.05606	Unmarked	16
NR_047528	Hotair	14.8085	54.2779	3.49673	Unmarked	16
NM_001002786	Rab44	32.1638	85.3462	2.60363	Unmarked	16
NM_001012726	Aym1	36.8046	76.4595	2.04894	Unmarked	16
NM_001164201	Cers3	38.9491	81.906	2.07529	Unmarked	16
NM_008132	Glrp1	34.655	76.4115	2.17113	Unmarked	16
NM_010183	Fbrs	33.8116	83.0778	2.41522	Unmarked	16
NM_011608	Tnfrsf17	38.5647	79.0144	2.02237	Unmarked	16
NM_025469	Clps	30.6871	81.0324	2.58883	Unmarked	16
NM_029508	Pcgf5	35.4127	78.9689	2.19618	Unmarked	16
NM_145227	Oas2	35.9898	76.8864	2.10562	Unmarked	16
NM_172125	Adam1b	35.2037	79.7264	2.22978	Unmarked	16
NM_172925	Klhl31	37.9763	79.1361	2.05602	Unmarked	16
NR_037233	Mir3072	40.9477	86.9128	2.09577	Unmarked	16
NR_040672	Gm13037	33.451	81.4775	2.39405	Unmarked	16
NM_001001179	BC048546	29.181	64.3162	2.16415	Unmarked	16
NM_001080708	Fam65c	26.766	73.2816	2.67527	Unmarked	16
NM_008089	Gata1	30.2561	73.3899	2.38001	Unmarked	16
NM_021384	Rsad2	26.3536	53.9397	2.0085	Unmarked	16
NM_025973	Pgc	29.2565	70.9301	2.37735	Unmarked	16
NM_175418	Mybpc1	29.8385	66.7874	2.19814	Unmarked	16
NM_206536	AB124611	34.2945	72.3278	2.0776	Unmarked	16
NR_033501	Gm7271	30.6847	67.2717	2.15472	Unmarked	16
NR_035407	Mir1224	28.8427	66.2098	2.25213	Unmarked	16
NM_001163526	S100a14	21.379	78.2841	3.54278	Unmarked	15
NM_018857	Msln	21.5317	79.3406	3.56566	Unmarked	15
NM_172904	Fsd2	19.5675	79.6574	3.92159	Unmarked	15
NM_175177	Bdh1	21.1336	79.2302	3.62481	Unmarked	15
NR_029575	Mir24-1	5.20029	78.651	12.8463	Unmarked	15
NR_045350	4930405J17Rik	11.6027	75.4691	6.0677	Unmarked	15
NM_001042580	Cd63	19.5146	65.7336	3.25298	Unmarked	15
NM_001081040	Coq10a	1.68262	60.589	22.9586	Unmarked	15
NM_001139519	Zbp1	8.99884	59.8183	6.08254	Unmarked	15
NM_001143956	Mettl11b	19.3369	65.9562	3.29236	Unmarked	15
NM_008528	Blnk	9.89559	63.9559	5.96167	Unmarked	15
NM_010734	Lst1	8.417	73.5622	7.91783	Unmarked	15
NM_013473	Anxa8	8.72737	66.1493	6.90313	Unmarked	15
NM_019538	Plac1	21.6967	51.0936	2.2952	Unmarked	15
NM_027085	Clic3	14.8615	74.0861	4.73386	Unmarked	15
NM_172750	Adprhl1	22.9599	60.0056	2.54615	Unmarked	15
NM_177081	Ptpn7	18.6274	62.306	3.22538	Unmarked	15
NM_181820	Tmc4	22.1752	57.1444	2.50891	Unmarked	15
NM_198419	Phactr1	5.99069	63.7412	9.26107	Unmarked	15
NR_028590	Gm14005	2.20757	54.8831	17.4223	Unmarked	15
NR_030444	Mir497	23.7149	57.3858	2.36237	Unmarked	15
NR_030706	C230004F18Rik	13.6345	52.0284	3.62352	Unmarked	15
NR_035491	Mir1965	8.3498	66.8921	7.26134	Unmarked	15
NR_045891	1700016G22Rik	9.22621	53.6092	5.34012	Unmarked	15
NM_001162998	Smim6	26.3022	75.9418	2.81815	Unmarked	15
NM_001163489	Sema4a	33.9184	75.4864	2.19043	Unmarked	15
NM_011488	Stat5a	29.6634	76.6018	2.53077	Unmarked	15
NM_011659	Tnfrsf4	36.1547	77.3357	2.10836	Unmarked	15
NM_030141	1700061G19Rik	29.632	86.6446	2.86121	Unmarked	15
NM_175333	Slc25a41	35.1167	80.5596	2.25823	Unmarked	15
NR_035494	Mir1968	29.2148	76.6736	2.57071	Unmarked	15
NR_038041	2310015B20Rik	34.9546	78.4638	2.21012	Unmarked	15
NR_040339	Gm19897	28.7129	78.81	2.68604	Unmarked	15
NR_040391	A230001M10Rik	28.7745	78.0296	2.65427	Unmarked	15
NR_045535	Sh2d3c	39.3169	79.9915	2.00887	Unmarked	15
NM_009965	Cryba1	29.0673	60.3595	2.04074	Unmarked	15
NM_027871	Arhgef3	30.283	68.2098	2.21238	Unmarked	15
NM_145467	Itgbl1	26.268	53.9435	2.01495	Unmarked	15
NR_027847	D630029K05Rik	28.9574	61.6063	2.08984	Unmarked	15
NM_008127	Gjb4	9.74527	81.1451	7.64477	Unmarked	14
NR_037235	Mir3074-1	6.58108	79.5542	10.6257	Unmarked	14
NR_040626	9230105E05Rik	18.4807	77.5598	4.03269	Unmarked	14
NM_001042779	Sema3b	14.4311	57.8732	3.81524	Unmarked	14
NM_001164558	Pdzk1ip1	16.7284	61.5713	3.52944	Unmarked	14
NM_001166390	Ptp4a3	4.82363	70.9908	12.3618	Unmarked	14
NM_001177438	Aldh3b2	18.1078	72.5958	3.85161	Unmarked	14
NM_008484	Lamb3	16.2492	63.701	3.75097	Unmarked	14
NM_008557	Fxyd3	21.6936	68.8943	3.07992	Unmarked	14
NM_008600	Mip	24.8391	59.0884	2.32549	Unmarked	14
NM_010170	F2rl2	24.1305	67.1721	2.71272	Unmarked	14
NM_011784	Aplnr	12.0905	56.8751	4.42113	Unmarked	14
NM_133681	Tspan1	18.2801	51.903	2.74392	Unmarked	14
NM_139198	Plac8	14.5972	55.1978	3.60306	Unmarked	14
NM_175347	Srl	23.6222	69.4531	2.86136	Unmarked	14
NM_206942	Ltk	18.3769	59.0642	3.09978	Unmarked	14
NR_030275	Mir503	18.0556	72.6643	3.86576	Unmarked	14
NR_037212	Mir3058	19.4412	73.5442	3.64677	Unmarked	14
NM_001029937	Sec14l3	35.7823	79.5719	2.19051	Unmarked	14
NM_001033394	Tmem88b	36.7893	80.4053	2.15419	Unmarked	14
NM_001101486	Fam71f2	30.2235	79.2171	2.56913	Unmarked	14
NM_001111324	Nedd9	26.3792	81.6773	3.01972	Unmarked	14
NM_001163194	Sfta2	37.2255	77.8486	2.06272	Unmarked	14
NM_008839	Pik3ca	38.9811	84.0109	2.12628	Unmarked	14
NM_010707	Lgals6	38.9153	80.6444	2.04544	Unmarked	14
NM_027063	1700013G24Rik	38.0733	84.0933	2.17779	Unmarked	14
NM_028050	1600016N20Rik	31.7835	75.6615	2.33842	Unmarked	14
NM_080846	Higd1b	29.5807	86.995	2.87746	Unmarked	14
NM_133184	Slc5a4a	29.4534	78.1878	2.6003	Unmarked	14
NM_145581	Siglec5	34.7753	79.4088	2.24761	Unmarked	14
NM_177243	Slc26a9	29.8404	77.373	2.54125	Unmarked	14
NR_035471	Mir1948	30.9479	79.54	2.52098	Unmarked	14
NR_040634	2310005A03Rik	39.4092	87.4268	2.18828	Unmarked	14
NR_045783	Gm10814	36.4884	87.8252	2.3694	Unmarked	14
NM_001099298	Scn2a1	27.273	64.5024	2.31678	Unmarked	14
NM_001145096	Hhla1	31.3954	71.8765	2.24959	Unmarked	14
NM_010129	Emp3	30.5389	71.1766	2.2885	Unmarked	14
NM_020025	B3galt2	28.3201	71.0168	2.45623	Unmarked	14
NM_028333	Angptl1	28.9925	59.0467	2.00206	Unmarked	14
NM_134110	Kcne2	25.2253	73.7735	2.8512	Unmarked	14
NM_175499	Slitrk6	35.0257	73.1299	2.05769	Unmarked	14
NM_007800	Ctsg	14.024	78.3642	5.2825	Unmarked	13
NM_029964	6030468B19Rik	21.5301	80.006	3.59546	Unmarked	13
NR_045476	1700007J10Rik	23.6539	83.1665	3.41392	Unmarked	13
NM_007445	Amh	21.0492	64.4796	2.9697	Unmarked	13
NM_009692	Apoa1	21.9113	58.1972	2.58376	Unmarked	13
NM_022031	Hapln2	23.9114	50.3678	2.06202	Unmarked	13
NM_026820	Ifitm1	6.46737	65.019	8.841	Unmarked	13
NM_028392	Ppp2r2b	6.50584	51.9364	7.05269	Unmarked	13
NM_031393	Sytl1	20.3394	55.6052	2.65261	Unmarked	13
NM_138671	Nadk	10.9458	62.4789	5.31393	Unmarked	13
NM_145379	Mrgprf	21.089	51.694	2.38553	Unmarked	13
NM_197944	Hsh2d	9.8405	61.1562	5.7337	Unmarked	13
NR_045264	AI847159	19.5598	67.2788	3.32099	Unmarked	13
NR_045978	4930543E12Rik	6.0734	58.1237	8.3586	Unmarked	13
NM_001081197	Apobec4	37.1591	79.4093	2.10721	Unmarked	13
NM_007802	Ctsk	36.9174	77.8458	2.07941	Unmarked	13
NM_010257	Gast	31.0495	78.4901	2.48023	Unmarked	13
NM_010758	Mag	35.2285	79.6626	2.2265	Unmarked	13
NM_023734	Pi16	32.1132	75.2153	2.30166	Unmarked	13
NM_026416	S100a16	31.8707	77.4618	2.38698	Unmarked	13
NM_027790	Dhrs2	32.7895	76.8926	2.30523	Unmarked	13
NM_029025	Tmem81	41.7139	85.4733	2.02447	Unmarked	13
NM_134102	Pla1a	28.3499	80.7048	2.78382	Unmarked	13
NM_172539	Astl	33.8775	77.6849	2.25603	Unmarked	13
NM_178241	Cxcr1	33.293	75.5441	2.23206	Unmarked	13
NM_183143	BC048679	35.8573	86.3916	2.37108	Unmarked	13
NM_199013	Irgc1	34.2898	84.3494	2.41853	Unmarked	13
NR_028478	Snora75	35.6129	82.9664	2.29336	Unmarked	13
NM_001025379	Sema3g	29.7037	61.642	2.04021	Unmarked	13
NM_001085509	Myom3	28.7467	66.1228	2.25648	Unmarked	13
NM_001163945	Rpl3l	28.6639	65.4174	2.239	Unmarked	13
NM_009509	Vil1	31.4919	65.6214	2.0504	Unmarked	13
NM_009924	Cnr2	30.1245	71.309	2.32322	Unmarked	13
NM_011533	Tbx10	35.5391	73.1531	2.02942	Unmarked	13
NM_019701	Clcnkb	27.1167	66.721	2.40857	Unmarked	13
NM_021791	Doc2g	32.2771	67.2847	2.052	Unmarked	13
NM_054077	Prelp	26.4462	69.9417	2.58476	Unmarked	13
NM_080462	Hnmt	26.8545	64.4116	2.34833	Unmarked	13
NM_147218	Abca6	33.0382	68.6865	2.0473	Unmarked	13
NM_207202	Ccdc120	28.4628	64.8336	2.23446	Unmarked	13
NR_015497	Gm20735	35.186	73.7645	2.06612	Unmarked	13
NR_030543	Mir190b	29.4156	72.1076	2.40362	Unmarked	13
NR_033490	2610100L16Rik	28.8825	59.1829	2.01398	Unmarked	13
NR_045831	4933408N05Rik	27.7135	65.7559	2.32489	Unmarked	13
NM_001163247	Birc7	23.148	80.2136	3.36316	Unmarked	12
NM_008533	Cd180	15.1624	85.4957	5.35168	Unmarked	12
NM_010821	Mpeg1	22.317	82.306	3.57275	Unmarked	12
NM_148933	Slco4a1	22.6958	83.6855	3.57385	Unmarked	12
NR_029530	Mir23b	6.76906	83.4085	10.8647	Unmarked	12
NM_001011875	Rnase12	16.481	67.5885	3.92361	Unmarked	12
NM_001033168	1700066B19Rik	3.87342	56.3685	11.7717	Unmarked	12
NM_001271884	Ano7	24.0037	73.8539	2.99371	Unmarked	12
NR_027797	Gm11961	16.5115	51.6917	3.00898	Unmarked	12
NR_044985	2210039B01Rik	17.5199	51.9054	2.85667	Unmarked	12
NR_045470	1110028F18Rik	16.8769	68.8452	3.907	Unmarked	12
NM_001002897	Atg9b	28.6355	75.6976	2.58803	Unmarked	12
NM_001105561	Gm11545	31.1239	79.5139	2.50636	Unmarked	12
NM_001195084	Plscr2	25.8984	79.5465	2.99447	Unmarked	12
NM_001195672	Ccdc170	27.8131	83.6315	2.93726	Unmarked	12
NM_008979	Ptpn22	28.4536	79.0015	2.71618	Unmarked	12
NM_009425	Tnfsf10	38.1385	78.1845	2.02319	Unmarked	12
NM_011872	Klk7	25.0013	77.5964	3.02278	Unmarked	12
NM_134157	Atp6v1b1	37.4829	77.4329	2.03812	Unmarked	12
NM_144547	Amhr2	35.5947	75.7942	2.09851	Unmarked	12
NM_182930	Plekha6	28.039	80.0021	2.78942	Unmarked	12
NR_029436	1700028J19Rik	36.7291	83.0209	2.22695	Unmarked	12
NR_029756	Mir322	34.0141	78.4039	2.26777	Unmarked	12
NR_035421	Mir1190	32.9095	81.4935	2.43275	Unmarked	12
NR_045909	1700023C21Rik	31.7267	82.9639	2.56561	Unmarked	12
NM_007955	Ptprv	25.902	68.5439	2.58508	Unmarked	12
NM_015776	Mfap5	29.8313	74.2557	2.44089	Unmarked	12
NM_021369	Chrna6	27.3848	72.0597	2.5739	Unmarked	12
NM_026790	Ifi27l1	32.3351	70.1666	2.13489	Unmarked	12
NM_029806	Lypd5	31.2117	71.0517	2.23682	Unmarked	12
NM_145210	Oas1e	35.3414	73.8932	2.06082	Unmarked	12
NM_172050	Cd300e	26.1924	69.4901	2.59227	Unmarked	12
NR_037275	Mir3092	29.2893	72.7306	2.43421	Unmarked	12
NR_040613	4930471I20Rik	29.3359	73.6576	2.46103	Unmarked	12
NR_040684	4933426D04Rik	28.8087	73.5949	2.50246	Unmarked	12
NR_040697	Gm10637	28.7448	64.2191	2.19262	Unmarked	12
NR_045309	A430088P11Rik	32.6455	72.5759	2.1868	Unmarked	12
NR_045967	A730085K08Rik	31.7913	72.0737	2.22845	Unmarked	12
NM_001033269	Eif4e1b	23.7596	71.8327	2.9416	Unmarked	11
NM_001081374	Prss36	11.4576	74.6391	6.07171	Unmarked	11
NM_001163416	Ptx4	21.1094	53.2667	2.45447	Unmarked	11
NM_001242380	Slc4a10	23.9245	55.6237	2.27181	Unmarked	11
NM_008521	Ltc4s	24.2019	60.4352	2.43772	Unmarked	11
NM_009363	Tff2	6.6709	62.7099	8.30541	Unmarked	11
NM_009635	Avil	22.5591	74.8392	3.21911	Unmarked	11
NM_010927	Nos2	17.49	71.2045	3.90507	Unmarked	11
NM_013566	Itgb7	3.59574	58.1567	12.8721	Unmarked	11
NM_020568	Plin4	17.5899	57.1482	3.12795	Unmarked	11
NM_022657	Fgf23	19.0908	62.4797	3.15964	Unmarked	11
NM_030062	9230112D13Rik	21.2662	54.212	2.47963	Unmarked	11
NM_133862	Fgg	17.9113	55.1776	2.97058	Unmarked	11
NM_144856	Slc22a7	24.8303	51.1486	2.01889	Unmarked	11
NM_146861	Olfr9	17.6464	61.5973	3.35708	Unmarked	11
NM_153551	Dennd1c	6.64869	74.3871	9.8562	Unmarked	11
NM_153576	Cxcl17	7.73466	66.3173	7.70691	Unmarked	11
NM_175440	Prss27	7.21924	64.9303	8.02146	Unmarked	11
NR_033558	F830002L21Rik	13.5899	64.1472	4.46522	Unmarked	11
NR_033603	Gm5176	22.4521	64.6025	2.7973	Unmarked	11
NR_037697	1500009C09Rik	24.5575	66.0533	2.62362	Unmarked	11
NM_001168502	Zfp57	25.9164	86.4111	3.2475	Unmarked	11
NM_007473	Aqp7	37.2268	80.5741	2.13395	Unmarked	11
NM_008209	Mr1	37.2032	76.2945	2.02325	Unmarked	11
NM_008327	Ifi202b	45.1096	91.6831	2.01006	Unmarked	11
NM_009803	Nr1i3	28.129	79.169	2.7522	Unmarked	11
NM_010292	Gck	37.2797	86.1803	2.27745	Unmarked	11
NM_010924	Nnmt	27.0156	78.1313	2.82454	Unmarked	11
NM_020517	Lenep	29.0821	84.202	2.83232	Unmarked	11
NM_027301	Sdr9c7	26.5969	83.8684	3.07528	Unmarked	11
NM_153504	Rnf183	38.7217	84.5844	2.1546	Unmarked	11
NM_177337	Arl11	26.8142	76.1058	2.77218	Unmarked	11
NM_177676	4931409K22Rik	35.4066	84.1004	2.3375	Unmarked	11
NM_183175	C1qtnf9	43.4706	88.3582	2.00938	Unmarked	11
NR_028565	Snord85	36.1828	83.8695	2.28249	Unmarked	11
NR_039573	Mir5113	37.245	79.9649	2.117	Unmarked	11
NR_045305	AU040972	26.2828	76.4514	2.83883	Unmarked	11
NR_046078	Gm4278	26.7469	80.6477	2.94259	Unmarked	11
NM_001039042	Klk13	26.6311	55.6698	2.05094	Unmarked	11
NM_007870	Dnase1l3	32.7077	72.2565	2.17329	Unmarked	11
NM_020583	Isg20	33.6487	73.1824	2.14099	Unmarked	11
NM_153801	Tecrl	27.5	56.0332	2.00117	Unmarked	11
NM_170727	Scgb3a1	30.3554	74.1013	2.39516	Unmarked	11
NM_177200	Svopl	29.5213	73.4863	2.44047	Unmarked	11
NM_178899	Hepacam2	26	61.1527	2.30195	Unmarked	11
NM_001033317	Cnga4	3.38589	77.8396	17.9758	Unmarked	10
NM_001162970	Aim1l	13.4185	78.9594	5.5456	Unmarked	10
NM_001173372	Fxyd4	10.3927	75.5772	6.72159	Unmarked	10
NM_001195730	Dcdc2b	22.2819	76.9976	3.35014	Unmarked	10
NM_029370	Spata25	2.11089	79.0764	25.7407	Unmarked	10
NR_040332	A930006I01Rik	24.8647	82.2404	3.2183	Unmarked	10
NM_001007266	Taar2	14.2565	63.6483	4.23741	Unmarked	10
NM_001102405	Acp5	10.3875	72.9857	6.49712	Unmarked	10
NM_001136237	Slc39a5	21.989	63.4096	2.80176	Unmarked	10
NM_001243090	A630095N17Rik	20.5162	64.9521	3.06523	Unmarked	10
NM_001271616	Fgfbp1	18.0892	51.6371	2.75743	Unmarked	10
NM_007409	Adh1	16.1342	73.4309	4.344	Unmarked	10
NM_008437	Napsa	10.8601	50.4529	4.3383	Unmarked	10
NM_018729	Cd244	16.6779	69.4107	3.98299	Unmarked	10
NM_023628	Anxa9	2.60916	57.5181	16.2138	Unmarked	10
NM_026214	Kctd4	8.20559	53.7045	5.94253	Unmarked	10
NM_028783	Robo4	19.51	55.7713	2.76798	Unmarked	10
NM_175191	Gpr22	19.4413	54.7493	2.72729	Unmarked	10
NR_028480	Gm12238	22.8391	72.0467	3.06416	Unmarked	10
NR_034052	Snora2b	7.63641	64.722	7.60988	Unmarked	10
NR_037993	B230216N24Rik	23.5521	71.6217	2.95786	Unmarked	10
NR_045695	Gm21057	11.5452	65.7823	5.32332	Unmarked	10
NR_045702	AW549542	4.54169	72.8921	13.3338	Unmarked	10
NM_001039114	Acsbg2	37.4708	89.326	2.34791	Unmarked	10
NM_001081424	Chrna10	33.424	78.0598	2.29665	Unmarked	10
NM_001085505	Gm572	38.4569	81.7846	2.0981	Unmarked	10
NM_001142337	Lmo2	38.9183	82.6461	2.09543	Unmarked	10
NM_001256309	Gm933	39.0922	81.9777	2.06967	Unmarked	10
NM_001271001	Gfra4	34.2284	78.5454	2.25799	Unmarked	10
NM_001276299	Avpr2	36.6299	79.0748	2.12796	Unmarked	10
NM_007695	Chi3l1	30.7208	78.9995	2.52198	Unmarked	10
NM_008631	Mt4	34.6953	80.1248	2.2727	Unmarked	10
NM_010189	Fcgrt	35.896	78.4273	2.15273	Unmarked	10
NM_016982	Vpreb1	34.1135	76.1707	2.19775	Unmarked	10
NM_020597	Msmb	38.275	83.0317	2.13957	Unmarked	10
NM_026300	4930549C01Rik	36.5831	77.9297	2.10014	Unmarked	10
NM_027708	Fbxo24	25.9169	77.3733	2.91167	Unmarked	10
NM_145963	Kcnj14	38.8235	79.8107	2.02922	Unmarked	10
NR_003282	Gm11194	38.9354	79.4806	2.01527	Unmarked	10
NR_027883	1700096J18Rik	36.9352	85.9434	2.29189	Unmarked	10
NR_037208	Mir3475	34.8568	87.8064	2.47669	Unmarked	10
NR_038347	Gm3143	29.2058	85.9533	2.87869	Unmarked	10
NR_040609	2010009K17Rik	41.8196	86.4839	2.04308	Unmarked	10
NR_046001	9130221H12Rik	38.9597	80.1081	2.02975	Unmarked	10
NR_046162	Gm16863	39.8128	81.678	2.02579	Unmarked	10
NM_001039038	Nhlrc4	30.7325	72.6677	2.32152	Unmarked	10
NM_009440	Tsx	34.227	74.6713	2.14811	Unmarked	10
NM_021353	Slc26a3	27.3311	63.6555	2.28214	Unmarked	10
NM_198858	Ctf2	34.4458	70.2126	2.00906	Unmarked	10
NR_033526	Gm16523	26.3065	73.9389	2.74436	Unmarked	10
NM_029463	4930568D16Rik	23.5822	80.2323	3.30452	Unmarked	9
NM_080854	Slc34a3	23.1021	78.9362	3.31657	Unmarked	9
NM_183191	Plch1	10.597	77.461	6.76561	Unmarked	9
NR_037994	2310043L19Rik	21.8866	82.4566	3.64653	Unmarked	9
NM_001009950	Slc38a8	14.6855	73.4784	4.74822	Unmarked	9
NM_001206849	Smim18	20.5719	53.7393	2.53753	Unmarked	9
NM_001243104	Gm6408	24.3615	63.9567	2.56123	Unmarked	9
NM_008230	Hdc	7.46492	55.9822	6.73157	Unmarked	9
NM_011315	Saa3	9.29049	61.5573	6.07913	Unmarked	9
NM_019412	Prx	22.0194	68.4572	3.01734	Unmarked	9
NM_027979	Chit1	24.0894	72.9267	2.94653	Unmarked	9
NM_133893	Oas1d	17.4789	53.7468	2.96267	Unmarked	9
NM_146017	Gabrp	8.47608	60.0014	6.43742	Unmarked	9
NM_153788	Acap1	7.17567	66.9288	8.30865	Unmarked	9
NM_177584	Btla	14.6278	50.7882	3.31384	Unmarked	9
NM_203492	Mrgprg	3.57988	64.9997	14.4108	Unmarked	9
NR_029570	Mir184	16.8651	65.7332	3.7354	Unmarked	9
NR_033510	1500017E21Rik	16.1393	59.6768	3.54022	Unmarked	9
NR_033786	1700052I22Rik	20.5632	72.5419	3.41053	Unmarked	9
NM_001168515	Rpgrip1	36.0797	89.2624	2.43428	Unmarked	9
NM_007449	Ang2	41.2723	84.1977	2.01545	Unmarked	9
NM_009184	Ptk6	36.9702	81.9322	2.18414	Unmarked	9
NM_011271	Rnase1	25.1081	76.2226	2.9578	Unmarked	9
NM_133353	Oosp1	36.1191	76.9193	2.09917	Unmarked	9
NM_178706	Siglech	35.5435	76.8819	2.13121	Unmarked	9
NR_028278	Gm8801	36.9174	75.1695	2.00883	Unmarked	9
NR_029819	Mir138-1	30.4698	75.6204	2.43473	Unmarked	9
NR_030259	Mir546	33.3623	76.3098	2.24985	Unmarked	9
NM_009131	Clec11a	34.6291	73.1414	2.08092	Unmarked	9
NM_010814	Mog	33.5058	70.9536	2.08526	Unmarked	9
NM_011333	Ccl2	35.6269	74.5838	2.06361	Unmarked	9
NM_031378	Gsdmc	33.4868	70.558	2.07494	Unmarked	9
NR_015455	BC064078	30.5457	74.806	2.40305	Unmarked	9
NM_001007572	Trpv5	22.0689	75.2902	3.30706	Unmarked	8
NM_030180	Usp54	12.58	78.4346	5.84937	Unmarked	8
NR_052011	Best2	19.7458	78.5131	3.83274	Unmarked	8
NM_001033498	Gramd2	4.35798	63.2636	11.994	Unmarked	8
NM_001255977	Gm4345	23.4566	64.4907	2.67783	Unmarked	8
NM_009005	Rab7	3.43328	69.7081	15.9494	Unmarked	8
NM_009710	Art1	8.60986	58.5006	6.19161	Unmarked	8
NM_021453	Pga5	22.1538	62.9321	2.76119	Unmarked	8
NM_025890	Khdc3	23.3974	74.7238	3.10377	Unmarked	8
NM_029993	Mlana	16.7903	59.2965	3.38929	Unmarked	8
NM_134127	Cyp4f15	23.2757	50.5025	2.12156	Unmarked	8
NM_178594	Vtcn1	15.6813	67.4085	4.10091	Unmarked	8
NR_034074	Etd	21.9258	71.4833	3.16165	Unmarked	8
NM_001034910	Defb42	32.8305	75.4234	2.25901	Unmarked	8
NM_001101597	Gm7244	36.4624	81.8279	2.21096	Unmarked	8
NM_001163497	Cd160	25.1072	81.574	3.16289	Unmarked	8
NM_008504	Gzmm	37.7202	80.0602	2.09349	Unmarked	8
NM_010114	Klk1b22	36.8869	76.2839	2.03986	Unmarked	8
NM_013673	Sp100	32.7759	78.6567	2.35839	Unmarked	8
NM_013712	Itgb1bp2	32.7262	79.8127	2.39614	Unmarked	8
NM_027904	Cpn2	32.1558	75.592	2.31006	Unmarked	8
NM_028742	Ifltd1	35.9853	84.367	2.30813	Unmarked	8
NM_146077	Trim31	33.0118	80.1503	2.38594	Unmarked	8
NR_029789	Mir32	33.5593	88.7782	2.5978	Unmarked	8
NR_035450	Mir1929	31.7321	85.4302	2.64053	Unmarked	8
NR_038055	2310065F04Rik	29.3467	77.6861	2.59291	Unmarked	8
NR_045838	A730036I17Rik	34.7103	86.4076	2.44769	Unmarked	8
NM_001024673	Ifnl2	27.0725	69.3327	2.50539	Unmarked	8
NM_001164059	Sell	28.8886	59.9709	2.03994	Unmarked	8
NM_001171615	Myt1	30.0842	67.2118	2.19442	Unmarked	8
NM_032541	Hamp	26.0809	68.1494	2.55344	Unmarked	8
NM_183272	Fam24a	29.9522	62.344	2.04651	Unmarked	8
NR_030557	Mir344-2	26.4384	61.4425	2.27573	Unmarked	8
NR_045955	4930405P13Rik	30.5309	72.0022	2.31526	Unmarked	8
NM_001122660	Gm10639	19.193	81.7575	4.09832	Unmarked	7
NM_001100454	Wfikkn1	6.52303	59.8411	8.08732	Unmarked	7
NM_001113362	Tbc1d14	24.4113	61.2996	2.45165	Unmarked	7
NM_001195189	4930469G21Rik	4.16761	55.9952	11.0293	Unmarked	7
NM_009114	S100a9	23.2226	52.5681	2.21149	Unmarked	7
NM_021397	Zbtb32	17.2368	63.7077	3.54819	Unmarked	7
NM_023893	Sapcd1	7.69948	64.0012	7.47184	Unmarked	7
NM_134253	Bnipl	11.6007	51.9021	4.19834	Unmarked	7
NM_145079	Ugt1a6a	20.6221	74.6889	3.50053	Unmarked	7
NM_178666	Themis	15.6589	59.8145	3.65057	Unmarked	7
NR_029592	Mir205	11.8406	71.054	5.61144	Unmarked	7
NR_033541	Gm10389	3.15237	63.9627	15.6447	Unmarked	7
NR_045308	2700089I24Rik	20.8787	71.9656	3.33501	Unmarked	7
NM_001004141	Cyp2j11	37.2633	76.3324	2.02106	Unmarked	7
NM_001007574	A830010M20Rik	30.1878	75.8652	2.46459	Unmarked	7
NM_009160	Sftpd	36.6042	75.2468	2.02762	Unmarked	7
NM_011469	Sprr2b	41.9769	88.616	2.08521	Unmarked	7
NM_025496	Cdrt4	36.9373	88.1042	2.34872	Unmarked	7
NM_025619	1700019L03Rik	39.3269	82.7078	2.07573	Unmarked	7
NM_133213	Xpnpep2	25.192	80.2632	3.1026	Unmarked	7
NR_003564	Gm15698	34.0972	85.5497	2.466	Unmarked	7
NR_028534	Snord88c	33.8187	83.8629	2.43728	Unmarked	7
NR_039560	Mir5101	36.7291	85.8882	2.30295	Unmarked	7
NR_073535	Gm10364	33.7549	77.9262	2.27094	Unmarked	7
NM_001081386	Cdh19	26.7848	65.1235	2.37984	Unmarked	7
NM_001129803	Pcp2	29.3296	72.7831	2.43271	Unmarked	7
NM_001271690	Kcnj15	27.0717	60.6533	2.19628	Unmarked	7
NM_008104	Gcm2	30.0018	71.7874	2.34784	Unmarked	7
NM_008331	Ifit1	33.3806	67.8316	2.00205	Unmarked	7
NM_008552	Mas1	28.0508	74.1679	2.58747	Unmarked	7
NM_015766	Ebi3	28.8883	64.0603	2.17678	Unmarked	7
NM_019777	Ikbke	32.1145	74.6662	2.28498	Unmarked	7
NM_030028	Tmem190	30.8611	66.4985	2.11853	Unmarked	7
NM_053217	2010002M12Rik	28.5575	66.0175	2.26736	Unmarked	7
NM_133670	Sult1a1	34.3786	74.8932	2.14517	Unmarked	7
NR_029576	Mir190	31.5562	68.1503	2.12403	Unmarked	7
NR_030264	Mir542	25.8322	53.5145	2.03169	Unmarked	7
NR_030430	Mir672	28.6041	70.2298	2.40608	Unmarked	7
NR_035457	Mir1936	30.7267	70.963	2.26822	Unmarked	7
NM_173051	Serpinb1c	18.9634	81.6906	4.1421	Unmarked	6
NM_001033243	Ccdc114	19.474	54.3285	2.70237	Unmarked	6
NM_001162537	9330159F19Rik	7.84901	55.0807	6.33751	Unmarked	6
NM_021347	Gsdma	12.9761	51.337	3.74474	Unmarked	6
NM_021351	Cryba4	16.5404	59.3352	3.43979	Unmarked	6
NM_177773	4933408B17Rik	24.9149	66.3938	2.60058	Unmarked	6
NR_026896	4931440L10Rik	6.67655	68.6369	9.07138	Unmarked	6
NR_040639	Gm13490	9.36393	56.6422	5.56182	Unmarked	6
NR_045450	Gm11413	19.6758	70.1271	3.44011	Unmarked	6
NM_001033632	Ifitm6	28.7498	84.6169	2.87789	Unmarked	6
NM_008311	Htr2b	30.3905	86.4748	2.78666	Unmarked	6
NM_019911	Tdo2	37.3798	81.1389	2.14016	Unmarked	6
NM_020622	Fam3b	32.2335	79.6349	2.42631	Unmarked	6
NM_026296	4930548H24Rik	38.0704	80.495	2.08585	Unmarked	6
NM_027111	Lyg1	32.7811	78.8435	2.36355	Unmarked	6
NM_144935	BC018242	35.1439	80.0499	2.24242	Unmarked	6
NR_029904	Mir181b-2	41.3164	86.5902	2.06989	Unmarked	6
NM_001029876	Urb2	26.3539	74.2245	2.75005	Unmarked	6
NM_001100186	Zscan4d	35.5563	72.8697	2.02071	Unmarked	6
NM_001167593	Spata31d1b	34.3313	71.0632	2.03964	Unmarked	6
NR_026843	BC024582	29.7267	62.1711	2.0559	Unmarked	6
NR_040727	1700072B07Rik	31.8105	64.8739	2.00771	Unmarked	6
NR_045640	Gm20199	30.9582	63.3478	2.0135	Unmarked	6
NM_025416	Them5	18.0853	87.1095	4.61661	Unmarked	5
NM_010156	Samd9l	19.935	57.0825	2.77442	Unmarked	5
NM_016754	Mylpf	5.66227	74.0001	11.2574	Unmarked	5
NM_145451	Gpx6	22.5143	58.4836	2.52968	Unmarked	5
NM_172439	Inpp5j	23.3277	74.4165	3.10002	Unmarked	5
NM_183158	Cyp2ab1	14.3845	67.818	4.47321	Unmarked	5
NM_001271806	Agrp	25.3013	75.2439	2.89887	Unmarked	5
NM_023529	Ms4a10	33.1851	75.2807	2.2314	Unmarked	5
NM_028654	Tex36	34.0407	75.3957	2.1802	Unmarked	5
NR_015605	2900052N01Rik	37.1732	84.9909	2.25265	Unmarked	5
NR_028533	Snord88a	33.369	79.6283	2.34596	Unmarked	5
NM_001033621	Myot	31.173	66.3455	2.09323	Unmarked	5
NM_001081970	Apol8	33.3475	69.6512	2.05696	Unmarked	5
NM_181754	Gpr141	32.2002	66.4133	2.03051	Unmarked	5
NM_001033778	Gm5535	5.08926	66.1845	11.0333	Unmarked	4
NR_003508	Mx2	24.3616	68.2738	2.73144	Unmarked	4
NR_028362	Snord7	21.5135	72.1569	3.24947	Unmarked	4
NR_003520	Mx1	34.84	77.1722	2.18114	Unmarked	4
NR_028531	Snord69	41.694	90.4018	2.14086	Unmarked	4
NM_028171	Ceacam13	26.5653	66.2311	2.43898	Unmarked	4
NM_001010839	Taar7f	30.5688	76.6723	2.46042	Unmarked	3
NM_020495	Slco1b2	34.7325	76.842	2.17847	Unmarked	3

## Sheet: Human Osteosarcoma
Supplemental Table 7B. Gene promoters DNA hypermethylated in human osteosarcoma compared to osteoblasts and mesenchymal stem cells (MSCs), and their chromatin state in human ESCs
RefSeq Accession	Gene Symbol	Chromatin State in ESCs	Promoter CpG Count
NM_000125	ESR1	Bivalent	72
NM_000170	GLDC	Bivalent	82
NM_000196	HSD11B2	Bivalent	118
NM_000201	ICAM1	Bivalent	73
NM_000358	TGFBI	Bivalent	63
NM_000474	TWIST1	Bivalent	102
NM_000507	FBP1	Bivalent	77
NM_000514	GDNF	Bivalent	88
NM_000523	HOXD13	Bivalent	113
NM_000598	IGFBP3	Bivalent	122
NM_000678	ADRA1D	Bivalent	137
NM_000681	ADRA2A	Bivalent	92
NM_000693	ALDH1A3	Bivalent	154
NM_000717	CA4	Bivalent	81
NM_000789	ACE	Bivalent	118
NM_000797	DRD4	Bivalent	128
NM_000833	GRIN2A	Bivalent	80
NM_000835	GRIN2C	Bivalent	83
NM_000953	PTGDR	Bivalent	65
NM_001001555	GRB10	Bivalent	144
NM_001009566	CLSTN1	Bivalent	97
NM_001012338	NTRK3	Bivalent	97
NM_001025101	MBP	Bivalent	113
NM_001031847	CPT1A	Bivalent	116
NM_001039	SCNN1G	Bivalent	80
NM_001040061	C3orf72	Bivalent	86
NM_001040214	NKAIN2	Bivalent	109
NM_001042478	AJAP1	Bivalent	170
NM_001045	SLC6A4	Bivalent	79
NM_001049	SSTR1	Bivalent	45
NM_001077653	TBX20	Bivalent	91
NM_001083619	GRIA2	Bivalent	68
NM_001083620	GRIA2	Bivalent	66
NM_001101311	TMEM176B	Bivalent	88
NM_001111045	CCNA1	Bivalent	96
NM_001111047	CCNA1	Bivalent	112
NM_001114108	TTC22	Bivalent	69
NM_001122740	ESR1	Bivalent	42
NM_001122819	KIF17	Bivalent	120
NM_001122961	C1orf194	Bivalent	68
NM_001128850	RRAD	Bivalent	85
NM_001130487	NDRG4	Bivalent	139
NM_001134405	RUNDC3B	Bivalent	94
NM_001142293	ARFGAP3	Bivalent	113
NM_001142467	HES4	Bivalent	134
NM_001142634	SPDYA	Bivalent	102
NM_001145453	GFRA1	Bivalent	80
NM_001159	AOX1	Bivalent	54
NM_001161841	SULF2	Bivalent	58
NM_001167676	FAM229A	Bivalent	90
NM_001167681	FLI1	Bivalent	68
NM_001167959	TMEM178A	Bivalent	65
NM_001174168	SYK	Bivalent	90
NM_001178046	MX1	Bivalent	71
NM_001184996	RNF32	Bivalent	106
NM_001204813	NT5E	Bivalent	64
NM_001206957	RASSF1	Bivalent	87
NM_001242629	GFOD1	Bivalent	112
NM_001242935	SNCAIP	Bivalent	106
NM_001253723	DPYSL5	Bivalent	115
NM_001253724	DPYSL5	Bivalent	118
NM_001256877	KANK1	Bivalent	149
NM_001257989	TYMP	Bivalent	126
NM_001267048	KIAA1324	Bivalent	72
NM_001270470	SOCS2	Bivalent	115
NM_001271003	TFPI2	Bivalent	62
NM_001278183	EOMES	Bivalent	47
NM_001311	CRIP1	Bivalent	81
NM_001385	DPYS	Bivalent	79
NM_001394	DUSP4	Bivalent	117
NM_001437	ESR2	Bivalent	59
NM_001485	GBX2	Bivalent	136
NM_001717	BNC1	Bivalent	143
NM_001741	CALCA	Bivalent	49
NM_001941	DSC3	Bivalent	85
NM_002051	GATA3	Bivalent	77
NM_002089	CXCL2	Bivalent	72
NM_002181	IHH	Bivalent	115
NM_002193	INHBB	Bivalent	154
NM_002252	KCNS3	Bivalent	117
NM_002460	IRF4	Bivalent	92
NM_002462	MX1	Bivalent	60
NM_002729	HHEX	Bivalent	132
NM_002754	MAPK13	Bivalent	80
NM_002776	KLK10	Bivalent	27
NM_002891	RASGRF1	Bivalent	79
NM_003015	SFRP5	Bivalent	90
NM_003177	SYK	Bivalent	86
NM_003181	T	Bivalent	88
NM_003202	TCF7	Bivalent	135
NM_003311	PHLDA2	Bivalent	125
NM_003353	UCN	Bivalent	69
NM_003467	CXCR4	Bivalent	66
NM_003474	ADAM12	Bivalent	112
NM_003577	UTF1	Bivalent	137
NM_003839	TNFRSF11A	Bivalent	109
NM_003887	ASAP2	Bivalent	166
NM_004004	GJB2	Bivalent	117
NM_004093	EFNB2	Bivalent	128
NM_004119	FLT3	Bivalent	117
NM_004205	USP2	Bivalent	54
NM_004235	KLF4	Bivalent	119
NM_004297	GNA14	Bivalent	78
NM_004350	RUNX3	Bivalent	135
NM_004364	CEBPA	Bivalent	141
NM_004378	CRABP1	Bivalent	66
NM_004405	DLX2	Bivalent	85
NM_004440	EPHA7	Bivalent	68
NM_004496	FOXA1	Bivalent	109
NM_004566	PFKFB3	Bivalent	97
NM_004625	WNT7A	Bivalent	105
NM_004787	SLIT2	Bivalent	74
NM_004789	LHX2	Bivalent	93
NM_004978	KCNC4	Bivalent	136
NM_005114	HS3ST1	Bivalent	73
NM_005117	FGF19	Bivalent	92
NM_005169	PHOX2A	Bivalent	103
NM_005220	DLX3	Bivalent	49
NM_005221	DLX5	Bivalent	55
NM_005247	FGF3	Bivalent	101
NM_005249	FOXG1	Bivalent	108
NM_005264	GFRA1	Bivalent	62
NM_005382	NEFM	Bivalent	87
NM_005502	ABCA1	Bivalent	63
NM_005558	LAD1	Bivalent	87
NM_005568	LHX1	Bivalent	77
NM_005602	CLDN11	Bivalent	82
NM_005604	POU3F2	Bivalent	100
NM_005853	IRX5	Bivalent	116
NM_005949	MT1F	Bivalent	52
NM_005958	MTNR1A	Bivalent	91
NM_005994	TBX2	Bivalent	124
NM_006033	LIPG	Bivalent	50
NM_006042	HS3ST3A1	Bivalent	94
NM_006071	PKDREJ	Bivalent	104
NM_006113	VAV3	Bivalent	121
NM_006119	FGF8	Bivalent	127
NM_006161	NEUROG1	Bivalent	107
NM_006237	POU4F1	Bivalent	107
NM_006424	SLC34A2	Bivalent	68
NM_006497	HIC1	Bivalent	105
NM_006705	GADD45G	Bivalent	71
NM_006877	GMPR	Bivalent	89
NM_006909	RASGRF2	Bivalent	128
NM_006982	ALX1	Bivalent	58
NM_006988	ADAMTS1	Bivalent	71
NM_007117	TRH	Bivalent	74
NM_007173	PRSS23	Bivalent	101
NM_007191	WIF1	Bivalent	84
NM_007365	PADI2	Bivalent	69
NM_012093	AK5	Bivalent	68
NM_012182	FOXB1	Bivalent	88
NM_012183	FOXD3	Bivalent	121
NM_012205	HAAO	Bivalent	65
NM_012242	DKK1	Bivalent	59
NM_012259	HEY2	Bivalent	119
NM_012292	HMHA1	Bivalent	94
NM_013267	GLS2	Bivalent	65
NM_013372	GREM1	Bivalent	114
NM_014178	STXBP6	Bivalent	107
NM_014352	POU2F3	Bivalent	67
NM_014360	NKX2-8	Bivalent	68
NM_014405	CACNG4	Bivalent	141
NM_014427	CPNE7	Bivalent	105
NM_014553	TFCP2L1	Bivalent	110
NM_014978	SORCS3	Bivalent	107
NM_015077	SARM1	Bivalent	101
NM_015286	SYNM	Bivalent	113
NM_015567	SLITRK5	Bivalent	74
NM_015653	RIBC2	Bivalent	82
NM_016084	RASD1	Bivalent	101
NM_016192	TMEFF2	Bivalent	91
NM_016205	PDGFC	Bivalent	85
NM_016323	HERC5	Bivalent	100
NM_016358	IRX4	Bivalent	97
NM_016540	GPR83	Bivalent	75
NM_016563	RASL12	Bivalent	72
NM_017565	FAM20A	Bivalent	120
NM_017589	BTG4	Bivalent	57
NM_018298	MCOLN3	Bivalent	98
NM_018411	HR	Bivalent	100
NM_018487	TMEM176A	Bivalent	95
NM_018837	SULF2	Bivalent	118
NM_018943	TUBA8	Bivalent	86
NM_018960	GNMT	Bivalent	74
NM_019860	HTR7	Bivalent	128
NM_020132	AGPAT3	Bivalent	155
NM_020134	DPYSL5	Bivalent	120
NM_020142	NDUFA4L2	Bivalent	76
NM_020208	SLC6A20	Bivalent	92
NM_020465	NDRG4	Bivalent	140
NM_020469	ABO	Bivalent	116
NM_020630	RET	Bivalent	135
NM_021025	TLX3	Bivalent	87
NM_021110	COL14A1	Bivalent	57
NM_021192	HOXD11	Bivalent	134
NM_021926	ALX4	Bivalent	73
NM_021958	HLX	Bivalent	85
NM_021977	SLC22A3	Bivalent	131
NM_021978	ST14	Bivalent	101
NM_022358	KCNK15	Bivalent	85
NM_022652	DUSP6	Bivalent	62
NM_023067	FOXL2	Bivalent	88
NM_024019	NEUROG2	Bivalent	82
NM_024490	ATP10A	Bivalent	127
NM_025135	FHOD3	Bivalent	112
NM_025220	ADAM33	Bivalent	83
NM_030936	RNF32	Bivalent	111
NM_030968	C1QTNF1	Bivalent	70
NM_031439	SOX7	Bivalent	115
NM_031475	ESPN	Bivalent	114
NM_032551	KISS1R	Bivalent	94
NM_032594	INSM2	Bivalent	113
NM_032932	RAB11FIP4	Bivalent	129
NM_032954	MLXIPL	Bivalent	76
NM_033051	SLC46A2	Bivalent	69
NM_033255	EPSTI1	Bivalent	48
NM_033260	FOXQ1	Bivalent	108
NM_033302	ADRA1A	Bivalent	68
NM_033387	FAM78A	Bivalent	98
NM_052841	TSSK3	Bivalent	87
NM_057159	LPAR1	Bivalent	121
NM_058195	CDKN2A	Bivalent	93
NM_058238	WNT7B	Bivalent	109
NM_078487	CDKN2B	Bivalent	77
NM_133467	CITED4	Bivalent	97
NM_138342	GLB1L2	Bivalent	96
NM_138961	ESAM	Bivalent	82
NM_139155	ADAMTS14	Bivalent	97
NM_139314	ANGPTL4	Bivalent	86
NM_144583	ATP6V1C2	Bivalent	111
NM_145263	SPATA18	Bivalent	66
NM_145804	ABTB2	Bivalent	87
NM_145888	KLK10	Bivalent	50
NM_148674	SMC1B	Bivalent	85
NM_148896	NPB	Bivalent	97
NM_152270	SLFN11	Bivalent	50
NM_152386	SGPP2	Bivalent	113
NM_152390	TMEM178A	Bivalent	100
NM_152605	ZNF781	Bivalent	60
NM_152760	SNX32	Bivalent	59
NM_153221	CILP2	Bivalent	64
NM_153361	NIM1	Bivalent	69
NM_172103	EYA4	Bivalent	99
NM_173054	RELN	Bivalent	133
NM_173508	SLC35F3	Bivalent	120
NM_173567	EPHX4	Bivalent	83
NM_173660	DOK7	Bivalent	90
NM_174858	AK5	Bivalent	97
NM_174936	PCSK9	Bivalent	65
NM_175619	ZAR1	Bivalent	102
NM_175873	SOWAHA	Bivalent	99
NM_177550	SLC13A5	Bivalent	82
NM_178012	TUBB2B	Bivalent	85
NM_178161	PTF1A	Bivalent	124
NM_178181	CDCP1	Bivalent	87
NM_181711	GRASP	Bivalent	108
NM_181712	KANK4	Bivalent	81
NM_182527	CABP7	Bivalent	148
NM_182539	TCTE1	Bivalent	89
NM_182664	RASSF5	Bivalent	106
NM_182828	GDF7	Bivalent	105
NM_183357	ADCY5	Bivalent	135
NM_198075	LRRC56	Bivalent	77
NM_198717	PTGER3	Bivalent	82
NM_198993	STAC2	Bivalent	93
NM_199131	VAX1	Bivalent	75
NM_199243	GPR150	Bivalent	88
NM_201264	NRP2	Bivalent	99
NM_201532	DGKZ	Bivalent	106
NM_206918	DEGS2	Bivalent	116
NM_207377	TOMM20L	Bivalent	85
NM_207413	FAM150A	Bivalent	112
NM_213594	RFX4	Bivalent	49
NM_213606	SLC16A12	Bivalent	94
NR_003578	ZNF702P	Bivalent	59
NR_015447	LOC153684	Bivalent	79
NR_026865	C7orf13	Bivalent	111
NR_026887	CEBPA-AS1	Bivalent	131
NR_028044	IGF2-AS	Bivalent	103
NR_029839	MIR34B	Bivalent	83
NR_029840	MIR34C	Bivalent	30
NR_031649	MIR1247	Bivalent	145
NR_034160	USP2-AS1	Bivalent	57
NR_038263	SOCS2-AS1	Bivalent	105
NR_038277	PRKG1-AS1	Bivalent	58
NR_046653	VAV3-AS1	Bivalent	62
NR_047532	CDKN2B-AS1	Bivalent	94
NR_072980	NIM1	Bivalent	65
NR_103441	GDNF-AS1	Bivalent	83
NM_001077500	KLK10	H3K27me3-only	21
NM_001127598	IGF2	H3K27me3-only	77
NM_001177999	SLC34A2	H3K27me3-only	25
NM_001927	DES	H3K27me3-only	79
NM_001989	EVX1	H3K27me3-only	51
NM_003004	SECTM1	H3K27me3-only	85
NM_003269	NR2E1	H3K27me3-only	54
NM_018953	HOXC5	H3K27me3-only	47
NM_057093	CRYBA2	H3K27me3-only	90
NM_173860	HOXC12	H3K27me3-only	84
NR_027353	CD8A	H3K27me3-only	20
NR_030753	MIR615	H3K27me3-only	68
NR_038420	ZRANB2-AS1	H3K27me3-only	56
NM_000021	PSEN1	H3K4me3-only	75
NM_000094	COL7A1	H3K4me3-only	65
NM_000314	PTEN	H3K4me3-only	98
NM_000597	IGFBP2	H3K4me3-only	115
NM_000902	MME	H3K4me3-only	67
NM_001002031	ATP5G2	H3K4me3-only	63
NM_001008710	RBPMS	H3K4me3-only	101
NM_001015002	LLGL2	H3K4me3-only	115
NM_001017916	CYB561	H3K4me3-only	112
NM_001017967	MARVELD3	H3K4me3-only	86
NM_001033044	GLUL	H3K4me3-only	74
NM_001033056	GLUL	H3K4me3-only	101
NM_001037281	PARD6A	H3K4me3-only	81
NM_001080407	GLB1L3	H3K4me3-only	118
NM_001122659	EDNRB	H3K4me3-only	66
NM_001126049	KLLN	H3K4me3-only	98
NM_001127496	SPRY4	H3K4me3-only	76
NM_001128203	PLA2G16	H3K4me3-only	82
NM_001130702	BSCL2	H3K4me3-only	73
NM_001136113	POMT1	H3K4me3-only	96
NM_001144856	PLEKHG6	H3K4me3-only	79
NM_001159286	HDAC10	H3K4me3-only	90
NM_001160423	IGF2BP1	H3K4me3-only	81
NM_001164490	ADAM8	H3K4me3-only	68
NM_001166103	SPINT2	H3K4me3-only	90
NM_001170938	ISYNA1	H3K4me3-only	83
NM_001177520	ALPL	H3K4me3-only	95
NM_001185022	CLDN7	H3K4me3-only	40
NM_001185023	CLDN7	H3K4me3-only	60
NM_001201397	EDNRB	H3K4me3-only	36
NM_001253389	ISYNA1	H3K4me3-only	85
NM_001256627	BRSK2	H3K4me3-only	159
NM_001270366	LPPR3	H3K4me3-only	128
NM_001270467	SOCS2	H3K4me3-only	85
NM_001270468	SOCS2	H3K4me3-only	108
NM_001621	AHR	H3K4me3-only	87
NM_001669	ARSD	H3K4me3-only	76
NM_001822	CHN1	H3K4me3-only	119
NM_001853	COL9A3	H3K4me3-only	127
NM_001915	CYB561	H3K4me3-only	113
NM_002705	PPL	H3K4me3-only	95
NM_002848	PTPRO	H3K4me3-only	46
NM_003013	SFRP2	H3K4me3-only	82
NM_003502	AXIN1	H3K4me3-only	152
NM_003749	IRS2	H3K4me3-only	156
NM_003840	TNFRSF10D	H3K4me3-only	65
NM_003844	TNFRSF10A	H3K4me3-only	70
NM_003930	SKAP2	H3K4me3-only	66
NM_003961	RHBDL1	H3K4me3-only	71
NM_004029	IRF7	H3K4me3-only	73
NM_004031	IRF7	H3K4me3-only	78
NM_004116	FKBP1B	H3K4me3-only	82
NM_004155	SERPINB9	H3K4me3-only	86
NM_004181	UCHL1	H3K4me3-only	77
NM_004289	NFE2L3	H3K4me3-only	96
NM_004938	DAPK1	H3K4me3-only	95
NM_005052	RAC3	H3K4me3-only	144
NM_005176	ATP5G2	H3K4me3-only	71
NM_005258	GCHFR	H3K4me3-only	89
NM_005614	RHEB	H3K4me3-only	117
NM_005689	ABCB6	H3K4me3-only	85
NM_005725	TSPAN2	H3K4me3-only	84
NM_005931	MICB	H3K4me3-only	70
NM_006317	BASP1	H3K4me3-only	86
NM_006617	NES	H3K4me3-only	66
NM_006633	IQGAP2	H3K4me3-only	96
NM_007005	TLE4	H3K4me3-only	62
NM_007069	PLA2G16	H3K4me3-only	82
NM_007099	ACP1	H3K4me3-only	88
NM_007287	MME	H3K4me3-only	72
NM_007288	MME	H3K4me3-only	63
NM_007289	MME	H3K4me3-only	54
NM_014373	GPR160	H3K4me3-only	79
NM_014435	NAAA	H3K4me3-only	92
NM_014466	TEKT2	H3K4me3-only	61
NM_015641	TES	H3K4me3-only	88
NM_015677	SH3YL1	H3K4me3-only	101
NM_016016	SLC25A39	H3K4me3-only	112
NM_016047	SF3B14	H3K4me3-only	67
NM_016224	SNX9	H3K4me3-only	151
NM_017516	RAB39A	H3K4me3-only	83
NM_017823	DUSP23	H3K4me3-only	85
NM_018053	XKR8	H3K4me3-only	88
NM_018173	PLEKHG6	H3K4me3-only	86
NM_018438	FBXO6	H3K4me3-only	81
NM_020647	JPH1	H3K4me3-only	123
NM_020992	PDLIM1	H3K4me3-only	107
NM_021574	BCR	H3K4me3-only	101
NM_021979	HSPA2	H3K4me3-only	78
NM_022468	MMP25	H3K4me3-only	98
NM_022834	VWA1	H3K4me3-only	107
NM_022914	ACD	H3K4me3-only	88
NM_024330	SLC27A3	H3K4me3-only	68
NM_030613	ZFP2	H3K4me3-only	75
NM_031219	HDHD3	H3K4me3-only	28
NM_031464	RPS6KL1	H3K4me3-only	29
NM_032756	HPDL	H3K4me3-only	71
NM_032793	MFSD2A	H3K4me3-only	79
NM_032918	RERG	H3K4me3-only	56
NM_033364	MAATS1	H3K4me3-only	58
NM_080597	OSBPL1A	H3K4me3-only	94
NM_139021	MAPK15	H3K4me3-only	72
NM_144638	TMEM42	H3K4me3-only	110
NM_145006	SUSD3	H3K4me3-only	90
NM_145038	DRC1	H3K4me3-only	67
NM_145040	PRKCDBP	H3K4me3-only	76
NM_145182	PYCARD	H3K4me3-only	75
NM_152356	ZNF491	H3K4me3-only	58
NM_152359	CPT1C	H3K4me3-only	65
NM_152686	DNAJC18	H3K4me3-only	49
NM_152795	HIF3A	H3K4me3-only	46
NM_178033	CYP4X1	H3K4me3-only	52
NM_181335	ARHGAP8	H3K4me3-only	85
NM_181356	SUPT3H	H3K4me3-only	93
NM_182553	CNIH2	H3K4me3-only	115
NM_183394	CADPS	H3K4me3-only	75
NM_198988	LENG9	H3K4me3-only	94
NM_213720	CHCHD10	H3K4me3-only	77
NR_001566	TERC	H3K4me3-only	79
NR_027253	LOC285696	H3K4me3-only	83
NR_027786	SERHL	H3K4me3-only	86
NR_027918	CCDC62	H3K4me3-only	83
NR_030290	MIR564	H3K4me3-only	111
NR_033928	LOC389641	H3K4me3-only	66
NR_038133	CHN1	H3K4me3-only	101
NR_045574	ISYNA1	H3K4me3-only	91
NR_102367	TM7SF2	H3K4me3-only	66
NR_102400	C16orf98	H3K4me3-only	34
NR_102709	UCHL1-AS1	H3K4me3-only	61
NM_016356	DCDC2	Unmarked	59

## Sheet: Human Colorectal Tumor
Supplemental Table 7C. Gene promoters DNA hypermethylated in human colorectal primary tumor, and their chromatin state in human ESCs
RefSeq Accession	Gene Symbol	Chromatin State in ESCs	Promoter CpG Count
NM_000927	ABCB1	Unmarked	4
NM_000657	BCL2	Bivalent	45
NM_198387	CACNA1G	Bivalent	120
NM_001741	CALCA	Bivalent	49
NM_001759	CCND2	Bivalent	45
NM_001220491	CDH13	Bivalent	48
NM_001122631	CDKN1C	Bivalent	128
NM_018223	CHFR	K4-only	118
NM_000089	COL1A2	K4-only	52
NM_004378	CRABP1	Bivalent	66
NM_000104	CYP1B1	Bivalent	80
NM_000785	CYP27B1	Bivalent	25
NM_005215	DCC	Bivalent	42
NM_007335	DLEC1	Bivalent	62
NM_016574	DRD2	Bivalent	104
NM_001005463	EBF3	Bivalent	128
NM_014805	EPM2AIP1	K4-only	83
NM_001166243	FHIT	K4-only	57
NM_013445	GAD1	Bivalent	73
NM_002051	GATA3	Bivalent	77
NM_002052	GATA4	Bivalent	66
NM_080473	GATA5	Bivalent	118
NM_000852	GSTP1	K4-only	84
NM_005522	HOXA1	Bivalent	77
NM_000885	ITGA4	Bivalent	49
NM_004795	KL	Bivalent	129
NM_002412	MGMT	K4-only	106
NM_001040108	MLH3	K4-only	61
NM_000179	MSH6	K4-only	110
NM_005946	MT1A	K27-only	59
NM_005953	MT2A	Bivalent	69
NM_005954	MT3	Bivalent	83
NM_002478	MYOD1	Bivalent	85
NM_002500	NEUROD1	Bivalent	54
NM_006160	NEUROD2	Bivalent	44
NM_006161	NEUROG1	Bivalent	107
NM_145182	PYCARD	K4-only	75
NM_206963	RARRES1	Bivalent	104
NM_002899	RBP1	Bivalent	86
NM_052863	SCGB3A1	Bivalent	98
NM_002639	SERPINB5	Unmarked	29
NM_001184777	SEZ6L	Bivalent	98
NM_003012	SFRP1	Bivalent	109
NM_003013	SFRP2	K4-only	82
NM_003014	SFRP4	Bivalent	66
NM_003015	SFRP5	Bivalent	90
NM_020208	SLC6A20	Bivalent	92
NM_003745	SOCS1	K4-only	104
NM_001193376	TERT	K4-only	120
NM_003246	THBS1	K4-only	76
NM_001252634	THRB	Bivalent	109
NM_000362	TIMP3	K27-only	12
NM_016192	TMEFF2	Bivalent	91
NM_003841	TNFRSF10C	Bivalent	50
NM_001142626	TSHR	Bivalent	44
NM_000474	TWIST1	Bivalent	102
NM_001983	ERCC1	K4-only	60
NM_001114175	GABRA2	Bivalent	36
NM_000514	GDNF	Bivalent	88
NM_018951	HOXA10	K27-only	97
NM_001167617	MLH1	K4-only	53
NM_002545	OPCML	Bivalent	50
NM_001135690	PENK	Bivalent	80
NM_001271162	PGR	Bivalent	39
NM_000325	PITX2	Bivalent	67

## Sheet: Human Aging
Supplemental Table 7D. Gene promoters DNA hypermethylated duing human aging, and their chromatin state in human ESCs
RefSeq Accession	Gene Symbol	Chromatin State in ESCs	Promoter CpG Count
NM_000352	ABCC8	Bivalent	88
NM_003474	ADAM12	Bivalent	112
NM_006829	ADIRF	Unmarked	59
NM_024933	ANKRD53	Bivalent	56
NM_080605	B3GALT6	K4-only	162
NM_181809	BMP8A	Bivalent	150
NM_207440	C13orf35	Unmarked	21
NM_004360	CDH1	K4-only	76
NM_031890	CECR6	K4-only	115
NM_001163079	CECR6	K4-only	110
NM_001172684	CELF6	Bivalent	94
NM_052840	CELF6	Bivalent	93
NM_153221	CILP2	Bivalent	64
NM_000089	COL1A2	K4-only	52
NM_006650	CPLX2	Bivalent	70
NM_005215	DCC	Bivalent	42
NM_001941	DSC3	Bivalent	85
NM_004448	ERBB2	K4-only	58
NM_018948	ERRFI1	K4-only	137
NM_172103	EYA4	Bivalent	99
NM_182522	FAM19A4	Bivalent	86
NM_145175	FAM84A	Bivalent	83
NM_178820	FBXO27	K4-only	68
NM_153230	FBXO39	Bivalent	61
NM_018008	FEZF2	Bivalent	66
NM_012183	FOXD3	Bivalent	121
NM_005249	FOXG1	Bivalent	108
NM_024333	FSD1	K4-only	64
NM_031866	FZD8	Bivalent	118
NM_014568	GALNT5	K4-only	15
NM_000514	GDNF	Bivalent	88
NR_103441	GDNF-AS1	Bivalent	83
NM_000171	GLRA1	K27-only	52
NM_005814	GPA33	Unmarked	1
NM_080865	GPR62	Bivalent	24
NR_045511	GPR78	Bivalent	39
NM_080819	GPR78	Bivalent	60
NM_016540	GPR83	Bivalent	75
NM_004821	HAND1	Bivalent	66
NM_006735	HOXA2	K27-only	44
NM_152739	HOXA9	K27-only	85
NM_152739	HOXA9	K27-only	85
NM_014620	HOXC4	K27-only	32
NR_003084	HOXC5	K27-only	32
NM_153693	HOXC6	K27-only	32
NM_021193	HOXD12	K27-only	80
NM_000875	IGF1R	K4-only	112
NM_032880	IGSF21	Bivalent	102
NM_032594	INSM2	Bivalent	113
NM_003749	IRS2	K4-only	156
NM_005853	IRX5	Bivalent	116
NM_002220	ITPKA	Bivalent	115
NM_022055	KCNK12	Bivalent	141
NM_016601	KCNK9	Bivalent	118
NR_024627	KCNQ1DN	K27-only	103
NM_023930	KCTD14	K4-only	38
NM_017448	LDHC	K4-only	40
NM_000230	LEP	Unmarked	70
NM_182548	LHFPL5	K4-only	49
NM_004789	LHX2	Bivalent	93
NR_036442	LMF1	Bivalent	120
NM_001270366	LPPR3	K4-only	128
NM_002336	LRP6	K4-only	92
NM_002344	LTK	Bivalent	40
NM_080676	MACROD2	K4-only	95
NM_005461	MAFB	Bivalent	114
NM_005909	MAP1B	K4-only	87
NM_003980	MAP7	Bivalent	88
NM_002395	ME1	Bivalent	79
NR_039831	MIR4683	Bivalent	126
NR_029607	MIR7-3	Unmarked	22
NR_027148	MIR7-3HG	Unmarked	28
NM_015529	MOXD1	Bivalent	99
NM_005950	MT1G	Bivalent	45
NM_017433	MYO3A	K4-only	72
NM_002478	MYOD1	Bivalent	85
NM_198586	NHLRC1	K27-only	84
NM_007361	NID2	Bivalent	85
NM_025176	NINL	K4-only	117
NM_177400	NKX6-2	Bivalent	154
NM_002523	NPTX2	Bivalent	137
NM_003269	NR2E1	K27-only	54
NM_021005	NR2F2	Bivalent	137
NM_016522	NTM	K4-only	115
NM_014581	OBP2B	K27-only	33
NM_002584	PAX7	Bivalent	71
NM_031882	PCDHAC1	Bivalent	95
NR_045597	PDE10A	Bivalent	121
NM_182943	PLOD2	K4-only	87
NM_153026	PRICKLE1	Bivalent	117
NM_003738	PTCH2	Bivalent	79
NM_198717	PTGER3	Bivalent	82
NM_198965	PTHLH	K27-only	11
NM_002848	PTPRO	K4-only	46
NM_004914	RAB36	Bivalent	65
NM_002899	RBP1	Bivalent	86
NM_173560	RFX6	Bivalent	70
NM_002924	RGS7	Bivalent	126
NM_018962	RIPPLY3	Bivalent	107
NM_004560	ROR2	Bivalent	118
NM_001098577	RPL31	K4-only	66
NM_171999	SALL3	Bivalent	164
NM_001040151	SCN3B	Bivalent	86
NM_016176	SDF4	K4-only	158
NR_073207	SEL1L2	K4-only	72
NR_027786	SERHL	K4-only	86
NM_003012	SFRP1	Bivalent	109
NM_133266	SHANK2	K4-only	56
NM_007374	SIX6	Bivalent	75
NM_032513	SLC30A2	Bivalent	105
NM_021815	SLC5A7	Bivalent	75
NM_004787	SLIT2	Bivalent	74
NM_014587	SOX8	Bivalent	137
NM_004598	SPOCK1	Bivalent	74
NM_014351	SULT4A1	K4-only	129
NM_175733	SYT9	Bivalent	94
NM_000358	TGFBI	Bivalent	63
NM_003248	THBS4	Bivalent	79
NM_001252634	THRB	Bivalent	109
NR_046244	THRB-AS1	Bivalent	46
NR_027064	TINCR	Bivalent	104
NM_001204186	TP73	Bivalent	127
NM_033512	TSPYL5	Bivalent	100
NM_000474	TWIST1	Bivalent	102
NM_175619	ZAR1	Bivalent	102
NM_003408	ZFP37	Bivalent	64
NM_018651	ZKSCAN7	K4-only	71
NM_003451	ZNF177	Unmarked	44
NM_182594	ZNF454	K4-only	77
NM_207336	ZNF467	Bivalent	90
NR_038420	ZRANB2-AS1	K27-only	56
