# Supplementary material for: Decoding the function of bivalent chromatin in development and cancer
Source: HighWire-hosted journal article supplement (doi:10.1101/gr.275736.121), 2021-10-19
Supplement: Supplemental_Table_S8_.xlsx [file Supplemental_Table_S8_.xlsx]

## Sheet: Hypermethylated genes
Supplemental Table 8A. Gene promoters DNA hypermethylated in 14 TCGA human cancer types compared to corresponding normal (control) tissue and their chromatin state in human ESCs
			Cancer type (1, hypermethylated in cancer; 0, non-hypermethylated in cancer)
RefSeq Accession	Gene Symbol	Probe IDs mapping to Gene Promoter	BLCA	BRCA	COAD	HNSC	KIRC	KIRP	LIHC	LUAD	LUSC	PAAD	PRAD	READ	STAD	UCEC	No. of Cancer types hypermethylated in	hESC chromatin state
NM_001085384	ZNF154	cg01268824;cg03234186;cg05661282;cg08668790;cg11294513;cg12506930;cg21790626;cg26465391;cg27049766;cg27324426	1	1	0	1	0	0	1	1	1	0	1	0	1	1	9	K4-only
NM_024504	PRDM14	cg00384539;cg10457247;cg13267264;cg21255438;cg27029821	1	1	1	1	0	0	0	1	1	0	1	1	0	1	9	K4-only
NM_020063	BARHL2	cg00010742;cg01921432;cg06384463;cg06959142;cg17241310;cg18322569;cg25026529;cg26332310	1	1	1	1	0	0	0	1	1	0	0	1	0	1	8	Bivalent
NM_001039350	DPP6	cg03532926;cg06495961;cg14523847;cg14564076;cg22620221;cg24011260;cg27032232	1	1	0	1	0	0	0	1	1	1	1	0	0	1	8	Bivalent
NM_001267716	ZNF728	cg00379720;cg14654613;cg24911113	1	1	0	1	0	0	0	1	1	1	1	0	0	1	8	Unmarked
NM_012443	SPAG6	cg05099508;cg06908778;cg10648197;cg12377139;cg12610471;cg13933080;cg17098147;cg18247055;cg23016129;cg24031355;cg25261328;cg25802093;cg26492368	1	1	0	1	0	0	1	1	1	0	0	0	0	1	7	Bivalent
NM_207426	FOXI2	cg02595832;cg04617948;cg07918545;cg08829841;cg09614415;cg13929328;cg16642284;cg19884262;cg25539045;cg26115633	1	0	1	1	0	0	0	1	0	1	1	0	0	1	7	Bivalent
NM_001100391	RALYL	cg01538821;cg04842146;cg14153637;cg17215863;cg18016194;cg21671806;cg23458558;cg23649708;cg25757598	1	1	1	1	0	0	0	1	1	0	0	0	0	1	7	Bivalent
NR_024383	LINC00461	cg04819775;cg09884341;cg13982529;cg16055026;cg16638920;cg18318649;cg18894648;cg21230745;cg24058566;cg26972969	1	1	1	1	0	0	0	1	1	0	0	1	0	0	7	Bivalent
NM_000798	DRD5	cg00939495;cg03045635;cg04597433;cg06469345;cg09191036;cg09520393;cg09936561;cg21279601;cg23847712;cg26296488	0	1	0	1	0	0	0	1	1	1	1	0	0	1	7	Bivalent
NM_181460	PAX3	cg09424526;cg14265823;cg15133719;cg15608397;cg15703632;cg20584905	1	1	1	0	0	0	0	1	1	0	1	0	0	1	7	Bivalent
NM_002523	NPTX2	cg18952796	1	1	1	1	0	0	1	1	0	1	0	0	0	0	7	Bivalent
NM_005181	CA3	cg05355225;cg07560510;cg08582356;cg10184889;cg17480760;cg18674980;cg21172458;cg21346043;cg22927247	1	1	0	1	1	1	0	0	0	0	1	0	0	1	7	Bivalent
NM_021179	CCDC181	cg00002719;cg00100121;cg08047907;cg08104202;cg13958426;cg14826711;cg16998150;cg23818870;cg24808280	0	1	1	1	0	0	0	0	1	0	1	1	0	1	7	K4-only
NM_001142886	EPHX3	cg08457898;cg15826897;cg19744936;cg21595709;cg24745495;cg26010734	1	0	1	0	0	0	1	0	1	0	1	1	0	1	7	K4-only
NM_174900	ZFP42	cg00663077;cg06274159;cg10242602;cg11638298;cg14189571;cg14817655;cg16762735;cg17214381;cg18034737;cg24519147;cg24896649;cg27634344	1	1	0	1	0	0	0	0	1	1	1	0	0	1	7	K4-only
NM_032100	PCDHGB6	cg07613945;cg09465698;cg18507379;cg18617005;cg23034757	1	1	0	1	0	0	0	1	1	0	1	0	0	1	7	K4-only
NM_032087	PCDHGA7	cg02722596;cg12459904;cg18164784;cg21908557;cg22861116	1	1	0	1	1	0	0	0	1	1	0	0	0	1	7	Unmarked
NM_005249	FOXG1	cg02681442;cg02991338;cg04525757;cg05872306;cg08120263;cg10300684;cg10828337;cg10912240;cg17525102;cg18299578;cg19714132;cg19786627;cg27006650	1	1	1	1	0	0	0	1	0	0	0	1	0	0	6	Bivalent
NM_025003	ADAMTS20	cg01345315;cg11751806;cg19619405	1	1	0	1	0	0	0	1	1	0	0	0	0	1	6	Bivalent
NM_080617	CBLN4	cg00480389;cg06672560;cg20779964;cg25993718;cg27563985	1	1	0	1	0	0	0	1	1	0	0	0	0	1	6	Bivalent
NM_001144777	ELAVL4	cg00963169;cg02623400;cg05697849;cg10989897;cg13678973;cg18202449;cg19098763;cg22932804	1	0	0	1	0	0	0	1	1	1	0	0	0	1	6	Bivalent
NM_022454	SOX17	cg00123055;cg02919422;cg03329976;cg04672706;cg09626193;cg11214140;cg15186181;cg15710198;cg24891539;cg24928391;cg26059468	1	0	1	1	0	0	0	1	1	0	0	1	0	0	6	Bivalent
NM_001134285	ESRRG	cg00255368;cg00913949;cg06634716;cg21784383;cg22118524;cg25755575;cg25975621	1	0	1	1	0	0	0	1	1	0	0	1	0	0	6	Bivalent
NM_012306	FAIM2	cg04669574;cg06947913;cg09049251;cg16115588;cg18486102;cg27188703	0	1	1	0	0	0	0	1	0	0	1	1	0	1	6	Bivalent
NM_197970	BOLL	cg03774803;cg05783139;cg07495363;cg07734961;cg10124201;cg13356896;cg24589459	1	0	1	1	0	0	0	0	1	0	0	1	0	1	6	Bivalent
NM_004752	GCM2	cg02844545;cg05452406;cg09516476;cg09829319;cg14000361;cg14250833;cg18187244;cg20229534;cg22851295;cg24329557;cg25861699	1	1	1	0	0	0	0	1	0	0	1	1	0	0	6	Bivalent
NR_029697	MIR129-2	cg01939477;cg03365311;cg05376374;cg13537915;cg14416371;cg14944647;cg15556502;cg16407471	0	1	1	1	0	0	0	0	0	0	0	1	1	1	6	Bivalent
NM_004122	GHSR	cg07852825;cg10109500;cg14768785;cg15987088;cg17152757;cg24599434	1	0	1	1	0	0	0	0	1	0	0	1	0	1	6	Bivalent
NM_139247	ADCY4	cg05031016;cg05185634;cg12265829;cg13631572;cg14287235;cg16215203;cg16761581;cg19646112;cg23179456;cg25556905	1	1	1	0	0	0	0	0	0	0	1	1	0	1	6	Bivalent
NM_174978	C14orf39	cg12189551;cg18240143;cg23989821;cg26132298;cg27398547	1	1	0	1	0	0	0	1	0	0	0	1	0	1	6	Bivalent
NM_032391	PRAC	cg00960395;cg04574034;cg09866983;cg12374721;cg14230397;cg20094830;cg20945566;cg27170782	0	1	1	1	0	0	0	1	1	0	0	0	0	1	6	K27-only
NR_026878	FOXD2-AS1	cg03440588;cg08638320;cg09269866;cg22438763	0	0	1	1	0	1	0	1	1	0	0	1	0	0	6	K27-only
NM_014588	VSX1	cg00043788;cg01715455;cg01941895;cg02631468;cg03111498;cg15272362;cg16185834;cg19592637	1	1	1	1	0	0	0	0	0	0	0	1	0	1	6	K27-only
NM_152739	HOXA9	cg01354473;cg03464573;cg05065989;cg12600174;cg16104915;cg18447772;cg20399871;cg20741169;cg25999578;cg26365299;cg26476852;cg26521404;cg27009703	0	1	0	1	0	0	1	1	1	0	0	0	0	1	6	K27-only
NM_173651	FSIP2	cg10173774;cg20896233;cg21353911;cg24766821	1	1	0	1	0	0	0	1	1	0	0	0	0	1	6	K4-only
NM_033132	ZIC5	cg00529958;cg02600430;cg05617469;cg12907379;cg16105906;cg18557131;cg24136205;cg24259244	1	1	1	0	0	0	0	1	0	0	0	1	0	1	6	K4-only
NM_001042403	USP44	cg03308628;cg07783282;cg13879483;cg17368254;cg22802813	0	1	1	1	0	0	1	0	0	0	0	1	1	0	6	K4-only
NM_031497	PCDHA3	cg01089834;cg07463541;cg08288811;cg10649903;cg11429969	1	1	0	0	1	0	0	0	1	1	0	0	0	1	6	K4-only
NM_153449	SLC2A14	cg00955780;cg06122660;cg06645921;cg11207307;cg13323752;cg15251385;cg16404371;cg19556774	1	1	0	1	0	0	0	1	1	0	0	0	0	1	6	K4-only
NM_001114748	TMEM240	cg16306898;cg16601494	1	0	1	1	0	0	1	0	0	0	0	1	1	0	6	K4-only
NR_040095	LOC284801	cg01860778;cg04150495;cg11220245;cg20395967	0	1	0	1	0	0	1	0	1	1	0	0	0	1	6	Unmarked
NM_001193628	SMIM17	cg15808426;cg19526659;cg26163578	1	1	0	0	0	0	0	1	1	0	1	0	0	1	6	Unmarked
NR_036481	FGD5P1	cg00384701;cg15060599;cg23715830;cg24279418	1	1	0	0	0	0	0	1	1	1	0	0	0	1	6	Unmarked
NM_003735	PCDHGA12	cg02267483;cg02452944;cg07730329;cg07802710;cg11647681;cg12304520;cg21185686;cg21627409;cg23082339;cg24576050	1	1	0	0	0	0	1	0	1	1	0	0	0	1	6	Unmarked
NM_002460	IRF4	cg05766140;cg06392169;cg12741420;cg17228900;cg26433102	1	0	1	0	0	0	0	0	0	0	0	1	1	1	5	Bivalent
NM_002232	KCNA3	cg01423964;cg06750832;cg07808555;cg07903677;cg09410234;cg11595545;cg20302133;cg26013553;cg26071016	1	0	1	1	0	0	0	0	0	0	0	1	1	0	5	Bivalent
NM_003382	VIPR2	cg03976877;cg13794530;cg20673829;cg23572908;cg25189564	1	0	1	1	0	0	0	0	0	0	0	1	0	1	5	Bivalent
NR_015436	LINC00461	cg06980387;cg08620044;cg12393318;cg22055687	1	1	1	1	0	0	0	0	0	0	0	0	0	1	5	Bivalent
NM_153442	GPR26	cg02721665;cg02757432;cg03574723;cg04549162;cg11893763;cg16783279	1	0	1	1	0	0	0	0	0	0	0	1	0	1	5	Bivalent
NM_013998	TAC1	cg01287975;cg02539083;cg07550362;cg09236284;cg09910635;cg11873482;cg14221171;cg16288089;cg17437939	0	1	0	1	0	0	0	0	1	0	1	0	0	1	5	Bivalent
NM_001134734	C1orf94	cg02656891;cg04025150;cg04323427;cg16348470;cg22697574;cg24411961;cg27557134	0	1	0	1	0	0	0	1	0	1	0	0	0	1	5	Bivalent
NM_000905	NPY	cg00355281;cg05158615;cg15929698;cg16964348;cg21097881;cg24242823;cg24885417;cg25884711	1	0	1	0	0	0	0	0	0	0	0	1	1	1	5	Bivalent
NM_001035	RYR2	cg03422911;cg07914084;cg11657808;cg18375860	1	0	1	1	0	0	0	0	0	0	0	1	0	1	5	Bivalent
NM_153038	CCDC140	cg01790894;cg06916239;cg10416206;cg13767755;cg14093610;cg14265823;cg20969194;cg23546474;cg25596297	0	1	1	0	0	0	0	1	1	0	0	1	0	0	5	Bivalent
NM_001102562	43901	cg00339556;cg01791874;cg09017434;cg11452391;cg12456714;cg15015920;cg16150752;cg17030173;cg17712694;cg18325622;cg21901718;cg23065934;cg23479922;cg25092681	1	0	1	1	0	0	0	1	0	0	0	1	0	0	5	Bivalent
NM_001014809	CRMP1	cg03544320;cg07963234;cg15448975	1	1	0	0	0	0	1	1	0	1	0	0	0	0	5	Bivalent
NM_001198688	LEPR	cg00630958;cg03401738;cg03514351;cg08234308;cg16987305	1	0	1	1	0	0	0	1	0	0	0	1	0	0	5	Bivalent
NM_002889	RARRES2	cg17279839;cg27494647	0	1	0	1	0	0	0	0	1	0	1	0	0	1	5	Bivalent
NR_038344	MAGI2-AS3	cg02523844;cg04652097;cg04671932;cg05270344;cg07448060;cg08641579;cg22280038;cg24021956	1	0	1	1	0	0	0	0	0	0	0	1	0	1	5	Bivalent
NM_001136271	NKX2-6	cg03694713;cg03749016;cg05477514;cg10603004;cg13021619;cg13324546;cg14428146;cg15854847;cg20892260;cg22747746	1	1	0	1	0	0	0	0	0	0	1	0	0	1	5	Bivalent
NM_007117	TRH	cg01009664;cg02700891;cg11940285;cg17173166;cg18862481;cg22512438	1	0	0	1	0	0	0	1	1	0	0	0	0	1	5	Bivalent
NM_001029865	DBX1	cg02878244;cg03983645;cg08525845;cg10614045;cg11831238;cg13445796;cg16938805;cg18242712	1	1	0	1	0	0	0	1	0	0	0	0	0	1	5	K27-only
NM_021193	HOXD12	cg01405040;cg02694427;cg03874199;cg03964958;cg06571387;cg11754318;cg12268637;cg18022224;cg23130254	0	1	0	1	0	0	0	1	1	0	0	0	0	1	5	K27-only
NM_002148	HOXD10	cg03918304;cg05979020;cg10364040;cg13217260;cg17489939;cg18115040;cg21591742;cg25371634	0	1	0	1	0	0	0	1	1	0	0	0	0	1	5	K27-only
NM_001164529	ZNF135	cg02473540;cg06454760;cg08701621;cg09907936;cg16638540;cg18430128;cg22457238;cg22748799	1	0	1	1	0	0	0	0	1	0	0	1	0	0	5	K4-only
NM_032092	PCDHGA11	cg03892308;cg05870739;cg06572465;cg08395122;cg10679597;cg17857974;cg18118262;cg24954895;cg26647197	0	1	0	1	0	0	1	0	1	0	0	0	0	1	5	K4-only
NM_080872	UNC5D	cg06010588;cg08000065;cg13561879;cg17486097;cg26872137	0	1	1	1	0	0	0	0	0	0	0	1	0	1	5	K4-only
NM_003540	HIST1H4F	cg00436476;cg00620190;cg05159188;cg08260959;cg10723962;cg12260798;cg21425842;cg22723502	1	0	0	0	0	0	1	1	1	0	0	0	0	1	5	K4-only
NR_024435	MAP3K14-AS1	cg01627847;cg03048083;cg04992638;cg08124910;cg08247376;cg13001868;cg17222164;cg19539667;cg24542751;cg26532627;cg26742995	0	0	1	1	0	0	0	0	0	0	0	1	1	1	5	K4-only
NM_152343	SPATA32	cg01627847;cg03048083;cg04992638;cg08124910;cg08247376;cg11933779;cg13001868;cg17222164;cg19539667;cg24542751;cg26532627;cg26742995	0	0	1	1	0	0	0	0	0	0	0	1	1	1	5	K4-only
NM_018924	PCDHGB3	cg02575448;cg04242499;cg11086421;cg22737624;cg23348764;cg26337998	1	0	0	1	0	0	0	0	1	0	1	0	0	1	5	Unmarked
NM_003451	ZNF177	cg05250458;cg05928342;cg07788092;cg08065231;cg09578475;cg09643544;cg12089570;cg13703871;cg14737994;cg17283453;cg19275200;cg24189904	0	1	0	0	0	0	0	1	1	1	0	0	0	1	5	Unmarked
NM_001171660	CYB5R3	cg08690876	1	1	0	0	0	1	0	0	1	0	1	0	0	0	5	Unmarked
NR_037651	HSPB2-C11orf52	cg00514609;cg01158277;cg07476508;cg10048349;cg11694519;cg12947833;cg15204861	1	1	0	0	0	0	0	1	1	0	0	0	0	1	5	Unmarked
NM_001541	HSPB2	cg00514609;cg01158277;cg07476508;cg10048349;cg11694519;cg12947833;cg15204861	1	1	0	0	0	0	0	1	1	0	0	0	0	1	5	Unmarked
NM_014962	BTBD3	cg01444716;cg04682802;cg05822633;cg18808904	1	1	0	1	0	0	0	0	1	0	0	0	0	1	5	Unmarked
NM_207404	ZNF662	cg01357292;cg04146745;cg13871633;cg17619311;cg24384244;cg26523005	0	1	1	0	0	0	0	0	0	0	1	1	0	1	5	Unmarked
NR_030386	MIR663A	cg03940098;cg08304190;cg14345012;cg17796010;cg18291941;cg27138951	0	1	0	1	0	0	0	0	1	1	0	0	0	1	5	Unmarked
NM_016188	ACTL6B	cg08572611;cg09375063;cg24471254;cg26990587	1	1	0	0	0	0	0	1	0	1	0	0	0	0	4	Bivalent
NM_001206927	DNAH8	cg03166753;cg11764900	0	1	0	1	0	0	1	0	0	0	0	0	0	1	4	Bivalent
NM_001717	BNC1	cg06523224;cg07016258;cg08939095;cg09180848;cg14385245;cg17124224;cg18560204;cg18952647;cg20941110;cg26429925;cg26654798;cg27304406	0	1	1	0	0	0	0	0	0	0	0	1	0	1	4	Bivalent
NM_182628	CCDC37	cg00891278;cg01815671;cg09686443;cg11229862;cg19628148;cg20312228;cg20707970;cg21109744;cg23816347	1	0	1	1	0	0	0	0	0	0	0	1	0	0	4	Bivalent
NR_033652	LOC100132891	cg13620034;cg20079899;cg26280666;cg26799209;cg26876974	0	0	1	0	0	0	0	0	0	0	0	1	1	1	4	Bivalent
NM_001801	CDO1	cg02792792;cg07405021;cg07644368;cg08516516;cg11036833;cg12880658;cg14470895;cg16265906;cg16707405;cg23180938	1	0	1	0	0	0	0	0	0	0	0	1	0	1	4	Bivalent
NM_014618	DBC1	cg03625109;cg06602847;cg13685314;cg14445814;cg24818566	0	0	1	1	0	0	0	0	0	0	0	1	0	1	4	Bivalent
NM_021025	TLX3	cg02676375;cg02743222;cg05190315;cg06410537;cg17833476;cg18468394;cg25720804;cg25942450;cg26517714;cg26844246	1	0	1	0	0	0	0	1	0	0	0	1	0	0	4	Bivalent
NM_001082967	FAM19A5	cg04304705;cg14894848;cg19030607;cg22643811;cg23936463	0	0	1	1	0	0	0	0	0	0	0	1	0	1	4	Bivalent
NM_014978	SORCS3	cg03958798;cg08495770;cg08768569;cg10601616;cg10778841;cg14752336;cg16787600;cg20482521	0	0	1	1	0	0	0	0	0	0	0	1	0	1	4	Bivalent
NM_022055	KCNK12	cg01826863;cg03603951;cg04431946;cg08074851;cg13223402;cg13913015	0	0	1	1	0	0	0	0	0	0	0	1	1	0	4	Bivalent
NM_013305	ST8SIA5	cg09275869	0	0	1	0	0	0	0	0	0	0	0	1	1	1	4	Bivalent
NM_006043	HS3ST2	cg00885682;cg01574663;cg03757784;cg08214995;cg16399049;cg19064258;cg27403265	0	0	1	1	0	0	0	0	0	0	0	1	0	1	4	Bivalent
NR_033651	LOC100132891	cg06269753;cg09734791;cg14409559;cg20675505;cg23710218;cg25827490;cg25832771	1	0	1	0	0	0	0	0	0	0	0	1	1	0	4	Bivalent
NM_001278635	IRX4	cg03287574;cg05658487;cg07565505;cg14062050	1	0	0	0	0	0	0	1	0	1	0	0	0	1	4	Bivalent
NR_103789	LOC100506907	cg00891278;cg01815671;cg09686443;cg11229862;cg19628148;cg20312228;cg20707970;cg21109744;cg23816347	1	0	1	1	0	0	0	0	0	0	0	1	0	0	4	Bivalent
NM_003577	UTF1	cg02767771;cg03755123;cg08708684;cg09053680;cg09714379;cg11234328	1	0	1	1	0	0	0	0	0	0	0	0	0	1	4	Bivalent
NM_000797	DRD4	cg00556112;cg06825142;cg08726248;cg09607276;cg12928379;cg15861585;cg20931042;cg23501406	1	0	1	0	0	0	0	0	0	0	0	1	0	1	4	Bivalent
NM_007361	NID2	cg00766845;cg01231779;cg01781974;cg04701034;cg06782686;cg10149976;cg13592399;cg16066272;cg16695483;cg22881914;cg26394244	0	0	1	1	0	0	0	0	0	0	1	1	0	0	4	Bivalent
NM_174937	TCERG1L	cg03109827;cg06304097;cg23632875	0	1	1	0	0	0	0	0	0	1	0	0	0	1	4	Bivalent
NR_046356	GRIA4	cg03225817;cg03243226;cg04747226;cg07972135;cg15603568;cg19343464;cg20073686;cg21217024;cg23559689	0	0	1	1	0	0	0	0	0	0	0	1	0	1	4	Bivalent
NM_001480	GALR1	cg00854242;cg03032214;cg03175653;cg03502002;cg03659519;cg04534765;cg10486998;cg15146859;cg15343119;cg17911318;cg20872937;cg26721264	1	1	1	0	0	0	0	0	0	0	0	1	0	0	4	Bivalent
NM_005806	OLIG2	cg03696345;cg05724110;cg08870743;cg09793121;cg10217445;cg15299832;cg22869726;cg23253569;cg27254482;cg27357571	1	0	1	0	0	0	0	0	0	0	0	1	0	1	4	Bivalent
NM_003638	ITGA8	cg01078989;cg07073391;cg08361126;cg13291704;cg13492340;cg16422098;cg16902509;cg19944763;cg25825488;cg26104297	0	0	1	1	0	0	0	0	0	0	0	1	0	1	4	Bivalent
NM_130767	ACOT12	cg11137578;cg17741014;cg21942082	0	0	1	0	0	0	0	0	0	0	1	1	0	1	4	Bivalent
NM_144673	CMTM2	cg00049664;cg01683883;cg05546863;cg05976575;cg06033254;cg06666025;cg07153665;cg08032924;cg09849405;cg09854734;cg13813391;cg16626067	0	0	1	0	0	0	0	0	1	0	0	1	0	1	4	Bivalent
NM_152380	TBX15	cg03760839;cg03942051;cg05940231;cg07892597;cg08942939;cg10703826;cg12664119;cg14565725;cg24842086;cg24884142;cg25340966;cg26272623	0	0	0	0	0	0	1	1	1	0	0	0	0	1	4	Bivalent
NM_000492	CFTR	cg00735923;cg06081199;cg09626894;cg17204129;cg17616554;cg21461649	0	1	0	0	0	0	1	0	0	0	1	0	0	1	4	Bivalent
NM_018962	RIPPLY3	cg04965987;cg11299333;cg16345647;cg16886987	1	0	1	0	0	0	0	0	0	0	0	1	0	1	4	Bivalent
NM_006211	PENK	cg03483150;cg04127342;cg04598121;cg04612444;cg12877723;cg19414741;cg21694941;cg22848150;cg24645221	1	1	0	1	0	0	0	0	0	0	0	0	0	1	4	Bivalent
NM_018928	PCDHGC4	cg02022733;cg03640756;cg06428620;cg12145907;cg12648074;cg15361590;cg15949044;cg23445461	0	0	1	1	0	0	0	0	0	0	1	1	0	0	4	Bivalent
NM_003181	T	cg02149708;cg05655837;cg06073449;cg06463958;cg08214847;cg13032463;cg14638883;cg17188046;cg19675288;cg23688510	1	0	1	1	0	0	0	0	0	0	0	1	0	0	4	Bivalent
NM_001013031	SORCS1	cg11097433;cg11235663;cg13563903;cg24403845;cg24621437	0	0	1	1	0	0	0	0	0	0	0	1	0	1	4	Bivalent
NM_032411	C2orf40	cg06499647;cg07510423;cg09661951;cg10735632;cg14535980;cg17161250;cg21838979	1	0	1	0	0	0	0	1	0	0	0	1	0	0	4	Bivalent
NM_001278633	IRX4	cg03287574;cg05658487;cg07565505;cg14062050	1	0	0	0	0	0	0	1	0	1	0	0	0	1	4	Bivalent
NR_029669	MIR124-2	cg01517740;cg02226645;cg04104463;cg04559779;cg05455720;cg05474726;cg16189671;cg20653075;cg27313642	0	0	0	1	0	0	0	1	1	0	0	0	0	1	4	K27-only
NM_006735	HOXA2	cg02979457;cg04481096;cg04737131;cg05921905;cg06055873;cg06769202;cg09871315;cg19598584;cg20087093;cg20747380;cg22943986;cg23979631;cg24058604;cg25598840;cg26069745	0	0	1	0	0	0	0	1	1	0	0	1	0	0	4	K27-only
NM_014213	HOXD9	cg02885007;cg04739647;cg05167251;cg09578028;cg09968620;cg10957151;cg14991487	0	1	0	1	0	0	0	1	1	0	0	0	0	0	4	K27-only
NM_005068	SIM1	cg01258751;cg01446798;cg08133486;cg11471772;cg11891393;cg12865837;cg17942121;cg22478310;cg24592906	1	0	0	1	0	0	0	0	1	0	0	0	0	1	4	K27-only
NM_001144989	ZNF814	cg02280912;cg15746696;cg15759937;cg18860954;cg22510337;cg24124798;cg25400396;cg27112264	1	0	1	1	0	0	0	0	0	0	0	1	0	0	4	K4-only
NM_018935	PCDHB15	cg03572772;cg10757144;cg11368643;cg13337064;cg17023770;cg18664869;cg22732749;cg23941075;cg24951286;cg26380443	0	1	0	0	0	0	0	0	1	0	1	0	0	1	4	K4-only
NM_145297	ZNF626	cg01808171;cg16510409	0	0	0	1	0	0	0	0	0	0	0	1	1	1	4	K4-only
NM_001113493	44083	cg02884239;cg03804136;cg06848185;cg12783819;cg15044248;cg16779463;cg17300544;cg19554255;cg20275528	1	0	1	1	0	0	0	0	0	0	0	1	0	0	4	K4-only
NM_000848	GSTM2	cg02337836;cg03070194;cg03942855;cg06615940;cg07219542;cg08142344;cg12647497	0	0	1	0	0	0	0	0	0	0	1	1	1	0	4	K4-only
NM_001098721	GNG4	cg00043510;cg01712686;cg02328440;cg02780849;cg06173536;cg09649610;cg13455717;cg17816394;cg22941646;cg24454695	1	1	0	0	0	0	0	1	1	0	0	0	0	0	4	K4-only
NM_018927	PCDHGB7	cg07524997;cg08938584;cg10435816;cg13933262;cg14011639;cg17011276;cg23563234	1	0	0	1	0	0	1	0	0	0	0	0	0	1	4	K4-only
NM_001199570	CLIP3	cg02401399;cg21647257;cg22719241	1	0	0	1	0	0	0	0	0	0	1	0	0	1	4	K4-only
NM_001206941	FAM115A	cg02266399;cg09671837;cg09846875;cg16807089	1	0	0	0	0	0	0	0	1	0	1	0	0	1	4	K4-only
NM_003736	PCDHGB4	cg00911351;cg02741229;cg07125905;cg19734465;cg22041640;cg22648135;cg26282384	1	0	0	1	0	0	0	0	1	0	0	0	0	1	4	K4-only
NR_028594	ZNF833P	cg00777011;cg00965023;cg02274869;cg04598224;cg05950877;cg10123421;cg10608596;cg15209566;cg21771200;cg24159514;cg25394203;cg26590664;cg26772540	1	0	0	1	0	0	0	0	1	0	0	0	0	1	4	K4-only
NR_027391	SLC15A3	cg26090107	1	0	0	0	0	0	0	0	0	0	1	0	1	1	4	K4-only
NM_001012455	ZSCAN23	cg00651523;cg06818710;cg07836142;cg07838603;cg09682330;cg13525197;cg14547644;cg24703168	0	0	1	0	0	0	0	0	0	0	0	1	1	1	4	K4-only
NM_032101	PCDHGB7	cg07524997;cg08938584;cg10435816;cg13933262;cg14011639;cg17011276;cg23563234	1	0	0	1	0	0	1	0	0	0	0	0	0	1	4	K4-only
NM_001207044	CLASP2	cg00744866	1	1	0	1	0	0	0	0	0	0	1	0	0	0	4	K4-only
NM_002846	PTPRN	cg01382864;cg03970036;cg10140638;cg16166796	0	1	0	1	0	0	0	0	0	1	0	0	0	1	4	K4-only
NM_024794	EPHX3	cg03562044;cg05488632;cg14556683;cg15826897;cg16184495;cg17399362;cg17476026;cg18580265;cg19744936;cg26477573	0	0	1	0	0	0	1	0	0	0	1	0	0	1	4	K4-only
NR_028077	ZSCAN12	cg02622316;cg07660236;cg18815343;cg20275132;cg21488066;cg23164203;cg25060829;cg25666433;cg27577527	0	0	1	0	0	0	0	0	0	0	1	1	0	1	4	K4-only
NM_001278393	USP44	cg03162823;cg03308628;cg22538054;cg23982858	0	1	1	0	0	0	1	0	0	0	0	1	0	0	4	K4-only
NM_003433	ZNF132	cg00547077;cg00868383;cg03735888;cg07878486;cg12042659;cg19776201;cg24366702	0	0	1	0	0	0	0	0	0	0	0	1	1	1	4	K4-only
NR_040015	LOC100631378	cg04168853;cg15801340	1	0	0	1	0	0	0	0	1	0	0	0	0	1	4	Unmarked
NM_020893	CCDC180	cg01838004;cg14015656	0	1	0	1	0	0	0	0	0	0	1	0	0	1	4	Unmarked
NM_015547	ACOT11	cg02905900;cg10266490;cg21527621	0	1	0	0	0	0	0	0	1	0	1	0	0	1	4	Unmarked
NM_001134656	ZNF662	cg01357292;cg04146745;cg13871633;cg17619311;cg24384244;cg24701270;cg26523005	0	1	1	0	0	0	0	0	0	0	0	1	0	1	4	Unmarked
NM_173848	RALYL	cg00034076;cg00266009;cg05716166;cg16020747;cg26669044	0	0	1	1	0	0	0	0	0	0	0	1	0	0	3	Bivalent
NM_004439	EPHA5	cg02463418;cg09009536;cg10334354;cg12682684;cg14810013;cg24620673	0	0	1	0	0	0	0	0	0	0	0	1	0	1	3	Bivalent
NM_001093771	TXNRD1	cg05741937;cg07227926;cg14142965;cg15459780;cg17395064;cg21858255;cg26973714	0	1	0	0	0	0	0	0	0	0	1	0	0	1	3	Bivalent
NM_032532	FNDC1	cg00157796;cg09107912;cg09375620;cg14971597	0	0	1	0	0	0	0	0	0	0	0	1	1	0	3	Bivalent
NM_001109763	GSG1L	cg00843236;cg02732804;cg03394150;cg03921753;cg04577177;cg06192555;cg07376134;cg09528825;cg10471437;cg23178192	0	0	1	0	0	0	0	0	0	0	0	1	1	0	3	Bivalent
NM_001140	ALOX15	cg07057744;cg09000800;cg09872233;cg10227358;cg11278311;cg22280258	1	1	0	0	0	0	0	0	0	0	1	0	0	0	3	Bivalent
NM_198570	VWC2	cg01893212;cg02467990;cg04454951;cg04904331;cg09493505;cg14045872;cg18206027	0	0	1	0	0	0	0	0	0	0	0	1	0	1	3	Bivalent
NM_001142446	ANK1	cg05166490;cg17331296;cg19585816	0	0	1	0	0	0	0	1	0	0	0	1	0	0	3	Bivalent
NM_173465	COL23A1	cg04591034;cg07765621;cg08496276;cg10730712;cg11256387;cg20546002;cg22960186;cg23437733;cg25437410;cg25552435;cg26667699;cg26996818	0	0	1	0	0	0	0	0	0	0	0	1	1	0	3	Bivalent
NR_024360	ZFHX4-AS1	cg08322102;cg08322240;cg10074775;cg25662926	0	0	1	0	0	0	0	0	0	0	0	1	0	1	3	Bivalent
NM_013962	NRG1	cg03430846;cg04555373;cg04773818;cg24946597	0	0	1	0	0	0	0	0	0	0	0	1	0	1	3	Bivalent
NM_001172735	PPP1R16B	cg06207052;cg10305789;cg11172693;cg12510981;cg15821319;cg21656726;cg22128431;cg24834740	0	0	1	0	0	0	0	0	0	0	0	1	1	0	3	Bivalent
NM_001278238	PTPN5	cg13062406;cg16426537	0	0	1	1	0	0	0	0	0	0	0	1	0	0	3	Bivalent
NM_001775	CD38	cg02183671;cg15786280;cg15994026;cg24819835;cg26043257	0	0	1	0	0	0	0	0	0	0	1	1	0	0	3	Bivalent
NM_177400	NKX6-2	cg00626110;cg00701692;cg01384488;cg03905847;cg05904135;cg08441806;cg09260089;cg10171448;cg11068946;cg11163901;cg16949120;cg17259183;cg27583690	1	0	0	0	0	0	1	0	0	0	0	0	0	1	3	Bivalent
NM_001134366	GAD2	cg00733780;cg04599297;cg04838147;cg09056181;cg11328303;cg12527175;cg15850954;cg23050442;cg24820783	0	0	1	0	0	0	0	0	0	0	0	1	0	1	3	Bivalent
NM_000953	PTGDR	cg02191312;cg05302386;cg08504659;cg09516965;cg10837806;cg17929687;cg18242103;cg24089118;cg24989962	1	1	0	0	0	0	0	0	0	0	0	0	0	1	3	Bivalent
NM_001146216	TACC1	cg02245794;cg11241541;cg14597214;cg15659713;cg21708058	0	1	0	0	0	0	0	0	1	0	0	0	0	1	3	Bivalent
NM_014625	NPHS2	cg06515144;cg08186924;cg08229358;cg10711209;cg10980436;cg11237426;cg13931925;cg19016332;cg20701486;cg24483554	0	1	0	0	0	0	0	0	0	0	1	0	0	1	3	Bivalent
NM_203451	SERTM1	cg03804213;cg06639332;cg09907509;cg17906786;cg17934871	0	0	1	1	0	0	0	0	0	0	0	1	0	0	3	Bivalent
NM_001018039	SFMBT2	cg09060610;cg20299663	0	0	1	0	0	0	0	0	0	0	0	1	1	0	3	Bivalent
NM_001042536	INSC	cg01406482;cg02434443;cg09755939;cg12170314;cg12828075;cg13997645;cg22792646;cg23463269;cg23930945	0	0	1	1	0	0	0	0	0	0	0	1	0	0	3	Bivalent
NM_001134382	IQSEC1	cg01659586;cg03926815;cg04235837;cg14202325;cg18467168;cg21924571;cg23336797;cg27246282	0	1	1	0	0	0	0	0	0	0	0	1	0	0	3	Bivalent
NM_013264	DDX25	cg11413039;cg19792599;cg22097425;cg23727983	1	0	0	0	0	0	1	0	0	0	0	0	0	1	3	Bivalent
NM_030594	CPEB1	cg01645753;cg04184836;cg16043144;cg19665362;cg24319381	0	0	1	0	0	0	0	0	0	0	0	1	1	0	3	Bivalent
NM_001083619	GRIA2	cg00699993;cg10410142;cg13914083;cg15425280;cg23734973;cg25148589	0	0	1	1	0	0	0	0	0	0	0	1	0	0	3	Bivalent
NM_001085480	FAM162B	cg01302668;cg02026062;cg07641160;cg13631916;cg23367608;cg24805875	0	0	1	0	0	0	0	0	0	0	1	1	0	0	3	Bivalent
NM_178834	LAYN	cg02532096;cg02871995;cg03864000;cg04226536;cg06459000;cg12506005;cg19188306;cg19820372;cg21703322	0	0	1	0	0	0	0	0	0	0	1	1	0	0	3	Bivalent
NM_002584	PAX7	cg05052324;cg07536847;cg08235970;cg11428724;cg21170920	1	0	1	1	0	0	0	0	0	0	0	0	0	0	3	Bivalent
NM_000718	CACNA1B	cg05863502;cg12052661	0	1	0	0	0	0	0	1	0	0	0	0	0	1	3	Bivalent
NM_012293	PXDN	cg09118932;cg12164282;cg14037665;cg25181651	1	0	1	0	0	0	0	0	0	0	0	1	0	0	3	Bivalent
NM_032727	INA	cg08050235;cg15475851;cg17567560;cg18673954;cg21384402;cg23003534;cg23642747;cg24680586	0	0	1	0	0	0	0	0	0	0	0	1	1	0	3	Bivalent
NM_033176	NKX2-4	cg01798261;cg05227131;cg11667020;cg20049415;cg21200408;cg21200656;cg22204479;cg23408114;cg26156448;cg27147819	1	0	1	0	0	0	0	0	0	0	0	1	0	0	3	Bivalent
NR_029679	MIR137	cg04293733;cg04763554;cg05423529;cg14783814;cg19050990;cg22333214	0	0	1	0	0	0	0	0	0	0	0	1	0	1	3	Bivalent
NM_001115	ADCY8	cg02842496;cg03120091;cg05229355;cg07557260;cg16696270;cg22060073;cg22762091;cg26332560	0	0	0	1	0	0	0	0	0	0	0	1	0	1	3	Bivalent
NM_002052	GATA4	cg00397986;cg02726121;cg09130043;cg09951349;cg10866709;cg14379719;cg14666113;cg16803596;cg21073927;cg27100236	0	0	1	0	0	0	0	0	0	0	0	1	0	1	3	Bivalent
NR_033118	ZIC4	cg00235367;cg01581018;cg07850418;cg08812189;cg12388007;cg13340636;cg20939084;cg22796509;cg27416372	0	0	0	1	0	0	0	0	1	0	0	0	0	1	3	Bivalent
NM_152665	TCTEX1D1	cg08857729;cg09318375;cg09769134;cg11824639;cg14207728;cg16996144;cg17284804;cg19159365;cg19808205;cg24110050;cg24161501;cg25339566	0	1	0	1	0	0	0	0	0	0	0	0	0	1	3	Bivalent
NM_001191058	PDE1C	cg03876413;cg11321433;cg14369938;cg16719466	0	0	1	0	0	0	0	0	0	0	0	1	0	1	3	Bivalent
NM_002980	SCTR	cg01013590;cg07176264;cg20505223;cg26009192	0	0	1	1	0	0	0	0	0	0	0	1	0	0	3	Bivalent
NM_005098	MSC	cg03347018;cg06102330;cg13092523;cg14409559;cg14546394;cg20675505;cg23710218;cg24258699;cg25827490	0	0	1	0	0	0	0	0	0	0	0	1	1	0	3	Bivalent
NR_036580	LOC389023	cg03753331;cg04617755;cg12666279;cg21678377	0	0	1	1	0	0	0	0	0	0	0	1	0	0	3	Bivalent
NM_001083620	GRIA2	cg00699993;cg10410142;cg13914083;cg15425280;cg23734973;cg25148589	0	0	1	1	0	0	0	0	0	0	0	1	0	0	3	Bivalent
NM_001136103	TMEM132C	cg03530754;cg04475027;cg06164660;cg11877129;cg26682580	0	0	1	1	0	0	0	0	0	0	0	1	0	0	3	Bivalent
NM_004575	POU4F2	cg02610222;cg12935979;cg13262687;cg14631165;cg24199834	1	0	0	1	0	0	0	0	0	0	0	0	0	1	3	Bivalent
NM_003178	SYN2	cg02700894;cg15873301;cg20888142;cg22839075;cg26655299	0	1	1	0	0	0	1	0	0	0	0	0	0	0	3	Bivalent
NM_016552	ANKMY1	cg13030331;cg13604246;cg15766075;cg20002504;cg23964682;cg25810938	0	0	1	0	0	0	1	0	0	0	0	1	0	0	3	Bivalent
NM_021032	FGF12	cg01257828;cg04350913;cg10511904;cg15048660;cg16366473;cg16376000;cg21197774;cg23207710	0	0	1	0	0	0	0	0	0	0	0	1	1	0	3	Bivalent
NM_000388	CASR	cg05937969	0	0	1	0	0	0	0	0	0	0	0	1	1	0	3	Bivalent
NM_001004360	DPP10	cg00089091;cg01718116;cg04075191;cg04617755	0	0	1	1	0	0	0	0	0	0	0	1	0	0	3	Bivalent
NM_198148	CPXM2	cg03630088;cg05801246;cg09619146;cg12164321;cg14676407	0	0	1	0	0	0	0	0	0	0	0	1	0	1	3	Bivalent
NR_040029	LOC284395	cg02012703	0	0	1	1	0	0	0	0	0	1	0	0	0	0	3	Bivalent
NR_027011	YBX3P1	cg03131298;cg04764012;cg07350501;cg10222027;cg11706835;cg15811515	1	0	0	1	0	0	0	0	0	0	0	0	0	1	3	Bivalent
NM_001193502	TCF24	cg01824969;cg07922007;cg15684724;cg17694795	0	0	1	0	0	0	0	0	0	0	0	1	1	0	3	Bivalent
NM_001271003	TFPI2	cg03333330;cg07380959;cg09558850;cg10539069;cg14377593;cg15649801;cg17338208;cg19854521;cg20230721;cg22441533;cg23141855;cg23686014;cg24084681;cg24531255;cg26739865	0	0	1	0	0	0	0	0	0	0	0	1	1	0	3	Bivalent
NM_000843	GRM6	cg00582971;cg01281157;cg12483476;cg14859460;cg19806642;cg23003783;cg25423752	0	0	0	1	0	0	0	1	0	0	0	0	0	1	3	Bivalent
NR_029385	OTX2-AS1	cg02161478;cg12152002	0	0	0	1	0	0	0	0	1	0	0	0	0	1	3	Bivalent
NM_007226	NXPH2	cg00593536;cg00804628;cg10989763;cg14923640;cg17169699;cg18150439	0	0	1	0	0	0	0	0	0	0	0	1	0	1	3	Bivalent
NR_034138	LOC100144602	cg02463418;cg09009536;cg10334354;cg12682684;cg14810013;cg24620673	0	0	1	0	0	0	0	0	0	0	0	1	0	1	3	Bivalent
NM_001166247	GRIK2	cg05942459;cg06247406;cg10591607;cg13080565;cg13624528;cg14082127;cg16009558;cg18193094;cg21635870;cg22541254;cg24301620;cg24753760;cg26316946;cg27074174	0	0	0	0	0	0	0	1	1	0	0	0	0	1	3	Bivalent
NM_001794	CDH4	cg15874092;cg18092028	0	0	1	0	0	0	0	0	0	0	0	1	0	1	3	Bivalent
NM_022146	NPFFR1	cg06419761;cg15642759;cg16697438	0	0	1	1	0	0	0	0	0	0	0	1	0	0	3	Bivalent
NM_020659	TTYH1	cg02623991;cg09474331;cg10187559;cg15241920;cg21883754;cg23695687	0	0	1	1	0	0	0	0	0	0	0	0	0	1	3	Bivalent
NM_001080511	CLEC2L	cg04935449;cg08832906;cg18873914;cg24318763	0	0	1	0	0	0	0	0	0	0	1	1	0	0	3	Bivalent
NM_175607	CNTN4	cg00912625;cg04222358;cg06598836;cg26763727	0	0	1	0	0	0	0	0	0	0	0	1	0	1	3	Bivalent
NM_006158	NEFL	cg01614020;cg06999323;cg22978087	0	0	1	0	0	0	0	0	0	0	0	1	0	1	3	Bivalent
NM_198179	QRFPR	cg00015770;cg03356900;cg05604079;cg06991300;cg13643914;cg15105182;cg16326674;cg16999370;cg19971716;cg24727399	0	0	1	0	0	0	0	0	0	0	0	1	0	1	3	Bivalent
NM_147182	KCNIP4	cg00688962;cg06482428;cg07204550;cg11743349;cg18347642;cg22434409;cg24663256	1	0	1	0	0	0	0	0	0	0	0	1	0	0	3	Bivalent
NM_001042478	AJAP1	cg04027805;cg09175749;cg11835068;cg17525406	0	0	1	0	0	0	0	0	0	0	0	1	0	1	3	Bivalent
NM_001127612	PAX6	cg01867395;cg05091519;cg09041678;cg09656389;cg13570972;cg14037837;cg15778437;cg26315277;cg27597956	0	0	1	0	0	0	0	1	0	0	0	0	0	1	3	Bivalent
NM_171999	SALL3	cg05884032;cg06954658;cg07382554;cg13794993;cg14007067;cg15191648;cg16433156	0	1	0	0	0	0	0	0	0	0	0	1	0	1	3	Bivalent
NM_052917	GALNT13	cg02593932;cg07547000;cg12079322;cg12424785;cg21998983;cg26983710	0	0	1	0	0	0	0	0	0	0	0	1	0	1	3	Bivalent
NM_001034845	GALNTL6	cg03304610;cg03413465;cg05295006;cg14307443;cg15533075;cg22153181;cg26588943;cg26814276	0	0	1	0	0	0	0	0	0	0	0	1	0	1	3	Bivalent
NM_001178034	DPP10	cg00089091;cg01718116;cg04075191;cg04617755	0	0	1	1	0	0	0	0	0	0	0	1	0	0	3	Bivalent
NM_015879	ST8SIA3	cg04017533;cg05826255;cg09036612;cg13096208;cg16902385;cg22070406;cg24811864	1	0	0	1	0	0	0	0	0	0	0	0	0	1	3	Bivalent
NM_006236	POU3F3	cg01878345;cg05506365;cg17078686;cg20291049;cg24472231	0	0	1	1	0	0	0	0	0	0	0	1	0	0	3	Bivalent
NM_001172517	SATB2	cg00586817;cg04021372;cg05165940;cg10982364;cg17360781;cg22539420;cg27308895	0	0	0	0	0	1	1	0	1	0	0	0	0	0	3	K27-only
NM_003221	TFAP2B	cg01555614;cg17507887;cg25593948	1	0	0	0	0	0	0	0	1	0	0	0	0	1	3	K27-only
NM_153633	HOXC4	cg01524853;cg01579535;cg02264990;cg03923561;cg07266404;cg09720701;cg11585893;cg11746813;cg15233062;cg15894722;cg22747076	0	0	0	1	0	0	0	0	1	0	1	0	0	0	3	K27-only
NM_000192	TBX5	cg03877376;cg10281002;cg14431443;cg16458436;cg16559598;cg17645823;cg21907579;cg23827572;cg26196480	0	0	0	1	0	0	0	0	1	0	0	0	0	1	3	K27-only
NM_006194	PAX9	cg05917460;cg23655970	1	1	0	0	0	0	0	0	1	0	0	0	0	0	3	K27-only
NM_001080458	EVX2	cg01720455;cg01749491;cg07411620;cg11359133;cg12074182;cg14085358;cg14118515;cg15133351;cg24683680;cg25027832	0	0	0	1	0	0	0	0	1	0	1	0	0	0	3	K27-only
NM_152688	KHDRBS2	cg00472801;cg03656899;cg11315153;cg16587616;cg18134312;cg18239753;cg18884037;cg22014661;cg26715952	0	0	1	1	0	0	0	0	0	0	0	1	0	0	3	K4-only
NM_133466	ZFP82	cg07900968;cg09257332;cg13252583;cg13304274;cg24724633;cg25886284	0	0	1	0	0	0	0	0	0	0	0	1	1	0	3	K4-only
NM_001127892	SALL1	cg00582524;cg02864757;cg04550052;cg04698114;cg04844564;cg05151154;cg07498275;cg08526074;cg08806408;cg10297473	1	0	0	1	0	0	0	0	0	0	0	1	0	0	3	K4-only
NM_006984	CLDN10	cg04603730;cg06428163;cg10305311;cg13452162;cg16232183;cg16275739;cg16556145;cg18393747;cg18470456;cg24426691;cg25032595	1	0	1	0	0	0	0	0	0	0	0	1	0	0	3	K4-only
NM_001105204	RUSC1	cg08170787;cg08574629;cg15113766;cg15676040;cg19516515;cg22877509;cg24006126;cg24544490;cg24547565	0	1	0	1	0	0	0	0	0	0	0	0	0	1	3	K4-only
NM_005864	EFS	cg02213260;cg11840125;cg13011388;cg14370314;cg16585972;cg17606785;cg18844382;cg19736128;cg21013866;cg24114890	0	0	1	0	0	0	0	0	0	0	1	1	0	0	3	K4-only
NM_005639	SYT1	cg00020191;cg01588748;cg03205584;cg10841775;cg15245095;cg18689295	0	0	1	0	0	0	0	0	0	0	0	1	1	0	3	K4-only
NM_032679	ZNF577	cg03562414;cg06878361;cg09547119;cg10635122;cg10783469;cg11269599;cg13393830;cg16731240;cg22331349;cg22472290;cg23010048;cg24794228	0	0	0	1	0	0	0	0	1	0	1	0	0	0	3	K4-only
NM_021827	CCDC81	cg04573398;cg08897150;cg10395685;cg16404106;cg18121003;cg18282849;cg23817893;cg25500444	1	0	0	0	0	0	0	0	1	0	0	0	0	1	3	K4-only
NM_182594	ZNF454	cg02165355;cg03234732;cg03355526;cg10575261;cg10902717;cg16536329;cg17840719;cg20778451;cg23037403;cg24843380	1	0	0	1	0	0	0	0	0	0	0	0	0	1	3	K4-only
NM_003013	SFRP2	cg03202804;cg05164933;cg05774801;cg05874561;cg06549216;cg10942078;cg11354906;cg14063488;cg14289246;cg14330641;cg22178613;cg23121156;cg23207990;cg23292160;cg25645268;cg25775322	0	0	1	0	0	0	0	0	0	0	1	1	0	0	3	K4-only
NM_022479	WBSCR17	cg01366419;cg02172150;cg02300154;cg03044249;cg03893271;cg07143083;cg08251037;cg16005494;cg21135135;cg23839136	1	0	0	1	0	0	0	0	0	0	0	0	0	1	3	K4-only
NR_024181	ZNF577	cg03562414;cg06878361;cg09547119;cg10635122;cg10783469;cg11269599;cg13393830;cg16731240;cg22331349;cg22472290;cg23010048;cg24794228	0	0	0	1	0	0	0	0	1	0	1	0	0	0	3	K4-only
NR_037160	ZNF582-AS1	cg02763101;cg07135042;cg07778983;cg08464824;cg09568464;cg11740878;cg20984085;cg22647407;cg24039631;cg24733179;cg25267765	0	0	1	1	0	0	0	0	0	0	0	1	0	0	3	K4-only
NM_001250	CD40	cg01943874;cg06571407;cg11841529;cg16686951;cg17929951;cg19785066;cg19839655;cg21601405;cg22232207;cg24575067;cg25239996	0	1	1	0	0	0	0	0	0	0	0	1	0	0	3	K4-only
NM_178821	DAW1	cg00063174;cg01216370;cg08034379;cg14329157;cg14646075;cg21577049;cg22079747;cg23807890	0	0	1	0	0	0	0	0	0	0	1	0	0	1	3	K4-only
NM_014518	ZNF229	cg09793279;cg09896900;cg10166283;cg13498858;cg14056357;cg17904997;cg19311218;cg19375479;cg19915738;cg22720041	0	0	1	0	0	0	0	0	0	0	0	1	0	1	3	K4-only
NR_033940	LOC100129620	cg14991984;cg18623672;cg21782593;cg24373253;cg26034531;cg26527487	0	0	0	1	0	0	0	0	0	0	0	1	0	1	3	K4-only
NM_153027	FAM218A	cg00393585;cg06481168;cg08992305;cg11630554;cg12861945;cg20697094	0	0	1	0	0	0	0	0	0	0	0	0	1	1	3	K4-only
NM_001628	AKR1B1	cg02215070;cg04663564;cg06864853;cg09957386;cg10795359;cg13801416;cg14629509;cg16132520;cg18416881;cg21079345;cg24059115	0	0	1	0	0	0	0	0	0	0	1	1	0	0	3	K4-only
NM_183394	CADPS	cg02719752;cg11905007;cg13491481;cg15957055;cg21458907;cg23825335;cg24505341;cg25947544	1	0	0	1	0	0	0	0	0	0	0	0	0	1	3	K4-only
NM_005407	SALL2	cg00800229;cg01897797;cg21876626;cg22921760	0	1	0	0	0	0	0	1	0	0	1	0	0	0	3	K4-only
NM_016522	NTM	cg06874656;cg11473001;cg11965370;cg15585794;cg15617814;cg16462254;cg20881910;cg23699196;cg24284973;cg27370013	0	0	1	1	0	0	0	0	0	0	0	0	0	1	3	K4-only
NM_001127644	GABRA1	cg00048832;cg00051179;cg02322252;cg06418959;cg06479604;cg06907391;cg16355785;cg24554147;cg26597242	0	0	1	0	0	0	0	0	0	0	0	1	0	1	3	K4-only
NM_032385	FAXDC2	cg00604840;cg10257049;cg18188717;cg18260397;cg26655340	0	1	0	0	0	0	0	1	0	0	1	0	0	0	3	K4-only
NM_001008394	EID3	cg00588621;cg01848457;cg01857475;cg03817911;cg09477407;cg09884423;cg10572274;cg18633684;cg20923245;cg21234561;cg26614816;cg27205904	0	0	1	1	0	0	0	0	0	0	0	1	0	0	3	K4-only
NM_133460	ZNF418	cg07474494;cg08648727;cg11788523;cg11998703;cg12961842;cg13668618;cg15060012;cg18673377;cg21444693;cg21759268;cg26356061;cg26671652	0	0	0	1	0	0	0	0	1	0	0	0	0	1	3	K4-only
NM_144690	ZNF582	cg01772700;cg02763101;cg07135042;cg07778983;cg08464824;cg09568464;cg11740878;cg20984085;cg22647407;cg24039631;cg24733179;cg25267765	0	0	1	1	0	0	0	0	0	0	0	1	0	0	3	K4-only
NM_023035	CACNA1A	cg03697708;cg12092090;cg17509220;cg17509967;cg18011401;cg22187630;cg22491927	0	0	1	0	0	0	0	0	0	0	0	1	0	1	3	K4-only
NM_021072	HCN1	cg04259977;cg05201970;cg05539745;cg06498267;cg07254032;cg11285003;cg19697475	0	0	1	1	0	0	0	0	0	0	0	1	0	0	3	K4-only
NM_001127643	GABRA1	cg00048832;cg00051179;cg02065387;cg02322252;cg06479604;cg06907391;cg16355785;cg24554147;cg26597242	0	0	1	0	0	0	0	0	0	0	0	1	0	1	3	K4-only
NM_020813	ZNF471	cg00674365;cg11539780;cg14042851;cg14277392;cg14289985;cg19358877;cg19811761;cg24713204	0	0	1	1	0	0	0	0	0	0	0	1	0	0	3	K4-only
NR_073026	ZNF334	cg01471196;cg07139762;cg10140114;cg10705541;cg25828181;cg27385032	0	0	1	0	0	0	0	0	0	0	0	1	0	1	3	K4-only
NM_018925	PCDHGB5	cg03608712;cg04553690;cg08491188;cg11686427;cg24954590;cg25426815	1	0	0	0	0	0	0	0	1	0	0	0	0	1	3	K4-only
NM_001278510	ZNF229	cg09793279;cg09896900;cg10166283;cg13498858;cg14056357;cg17904997;cg19311218;cg19375479;cg19915738;cg22720041	0	0	1	0	0	0	0	0	0	0	0	1	0	1	3	K4-only
NM_144650	ADHFE1	cg01588438;cg01988129;cg08090772;cg09383816;cg18065361;cg19283840;cg20295442;cg20912169;cg25046651	0	0	1	0	0	0	0	0	0	0	0	1	0	1	3	K4-only
NM_001005850	ZNF835	cg01501009;cg08146323;cg08158952;cg08333333	0	0	0	1	0	0	0	0	1	0	0	0	0	1	3	K4-only
NM_001242680	ZNF729	cg02438781;cg02657401;cg14152139	0	0	0	1	0	0	0	0	1	0	0	0	0	1	3	Unmarked
NR_038323	LOC100507156	cg09535960	0	1	0	0	0	0	0	0	0	0	1	0	0	1	3	Unmarked
NM_001276290	PRKAR1A	cg07425204	0	1	0	0	0	1	0	0	1	0	0	0	0	0	3	Unmarked
NR_027337	HIST2H2BA	cg05659741;cg13688123;ch.1.2799699R	0	0	1	0	0	0	0	0	0	0	0	1	0	1	3	Unmarked
NM_145867	LTC4S	cg09629657;cg11394785;cg12200124;cg16361890;cg19759135;cg26683398	0	1	0	0	0	0	0	0	0	0	1	0	0	1	3	Unmarked
NM_001173476	SPEG	cg21117965	0	1	0	0	0	1	0	0	0	0	1	0	0	0	3	Unmarked
NM_001145774	GPR56	cg09109520	0	0	0	0	0	1	0	0	0	0	1	0	1	0	3	Unmarked
NM_024335	IRX6	cg04853843;cg09659661;cg10250663	0	0	1	0	0	0	0	0	0	0	0	1	0	0	2	Bivalent
NM_001004329	DBX2	cg00067018;cg02332982;cg05135569;cg07469402;cg12915695;cg13031210;cg13186327;cg15697849;cg16080781;cg19788831;cg26274596	0	0	1	0	0	0	0	0	0	0	0	1	0	0	2	Bivalent
NM_003728	UNC5C	cg00329039;cg01194057;cg07234102;cg10520887;cg11723848;cg13265789;cg15984718;cg17334018;cg22634891	0	0	1	0	0	0	0	0	0	0	0	1	0	0	2	Bivalent
NR_027239	ZNF529	cg02587316;cg04332534;cg05020604;cg09430118;cg18630667;cg19406736;cg22517995;cg25397945;cg27658967	0	0	0	1	0	0	0	0	0	0	0	0	1	0	2	Bivalent
NM_000910	NPY2R	cg03202738;cg06812991;cg14586939;cg14811608;cg18930994;cg20271517;cg21512644;cg26384430;cg27504805	0	0	1	0	0	0	0	0	0	0	0	1	0	0	2	Bivalent
NM_001256573	CHRNA4	cg00318573;cg01743841	0	0	1	0	0	0	0	0	0	0	0	1	0	0	2	Bivalent
NM_001160132	KCNQ5	cg00852573;cg03786924;cg04377145;cg05447008;cg09303936;cg11008243;cg15717808	0	0	1	0	0	0	0	0	0	0	0	1	0	0	2	Bivalent
NR_029691	MIR9-1	cg07234865;cg09346118;cg09938227;cg26073933	0	1	0	0	0	0	0	0	0	0	0	0	0	1	2	Bivalent
NM_001167681	FLI1	cg02526522;cg06072021;cg06172475;cg08590601;cg09037089;cg13755070;cg17872757;cg18142615;cg19897940	0	0	1	0	0	0	0	0	0	0	0	1	0	0	2	Bivalent
NM_001271458	C11orf93	cg10045354;cg21645554;cg25316749;cg26459819	0	1	0	0	0	0	0	0	0	0	1	0	0	0	2	Bivalent
NM_030569	ITIH5	cg04711998;cg10151473;cg10311806;cg22444507	0	0	1	0	0	0	0	0	0	0	0	1	0	0	2	Bivalent
NM_207313	TMEM132E	cg03442425;cg06459443;cg08033114;cg10451253;cg17750959;cg18338311;cg21745612;cg27213352	0	0	1	0	0	0	0	0	0	0	0	1	0	0	2	Bivalent
NM_012205	HAAO	cg01561916;cg08421126;cg09256201;cg09368936;cg09480054;cg20289949;cg26360792;cg27299406	0	0	0	0	0	0	0	0	0	0	1	0	0	1	2	Bivalent
NM_001100393	RALYL	cg00266009;cg05716166;cg16020747;cg26669044	0	0	1	0	0	0	0	0	0	0	0	1	0	0	2	Bivalent
NM_005247	FGF3	cg00043379;cg04495670;cg06329574;cg11174851;cg15020425;cg15119027;cg15337897;cg15554555;cg17277529;cg20177315;cg24359323;cg24795627	0	0	1	0	0	0	0	0	0	0	0	1	0	0	2	Bivalent
NM_145793	GFRA1	cg06039355;cg06298519;cg17256532;cg18044663;cg19485539;cg24792682;cg27034576	0	0	1	0	0	0	0	0	0	0	0	1	0	0	2	Bivalent
NM_001117	ADCYAP1	cg00128702;cg07211875;cg07376535;cg11773720;cg11850773;cg14200170;cg14489474;cg15458338;cg16457786;cg17059658;cg18319029;cg21438101;cg22388954;cg24287438	0	0	0	1	0	0	0	0	0	0	0	0	0	1	2	Bivalent
NM_002020	FLT4	cg05976714;cg07682600;cg17304222	0	0	1	0	0	0	0	0	0	0	0	1	0	0	2	Bivalent
NR_034102	LINC00966	cg13186884;cg19848629;cg24791025	0	0	0	1	0	0	0	0	0	0	0	0	0	1	2	Bivalent
NM_024337	IRX1	cg05534710;cg06689918;cg09232937;cg10530883	1	0	0	0	0	0	0	0	0	0	0	0	0	1	2	Bivalent
NM_001145250	SP9	cg01269597;cg03181248;cg03249890;cg04105760;cg08575330;cg08813062;cg11418477;cg14459130;cg18609783	1	0	0	0	0	0	0	0	1	0	0	0	0	0	2	Bivalent
NM_001043	SLC6A2	cg01277542;cg03226000;cg04490714;cg09321400;cg09746736;cg09774787;cg10362591;cg16629702	0	0	1	0	0	0	0	0	0	0	0	1	0	0	2	Bivalent
NM_015567	SLITRK5	cg06682197;cg09083627;cg15461335;cg19109538	0	0	1	0	0	0	0	0	0	0	0	1	0	0	2	Bivalent
NM_002163	IRF8	cg03978375;cg04597312;cg06672120;cg10155875;cg24826867;cg26970841	1	0	0	1	0	0	0	0	0	0	0	0	0	0	2	Bivalent
NM_016601	KCNK9	cg01532168;cg04344565;cg12175729;cg14930075;cg17834752	1	0	0	0	0	0	0	0	0	0	0	0	0	1	2	Bivalent
NM_004820	CYP7B1	cg00054210;cg01510388;cg03535659;cg04418492;cg09975850;cg10816489;cg12755298;cg15160198;cg19424531;cg22287624	0	0	1	0	0	0	0	0	0	0	0	0	0	1	2	Bivalent
NR_034095	LOC400456	cg04878701;cg07057579;cg14164099;cg16458494;cg18739950;cg23990012;cg26056703	0	1	0	0	0	0	0	0	0	0	0	0	0	1	2	Bivalent
NM_201551	NELL1	cg01563031;cg02510267;cg06873316;cg10824063;cg12071328;cg14689623;cg14749465;cg17371081;cg20113732;cg22769941;cg23861668	0	0	1	0	0	0	0	0	0	0	0	1	0	0	2	Bivalent
NM_014421	DKK2	cg01471384;cg01962428;cg08341316;cg13139972;cg14129775	0	0	1	0	0	0	0	0	0	0	0	1	0	0	2	Bivalent
NM_019102	HOXA5	cg01370449;cg02005600;cg02248486;cg02916332;cg04863892;cg09549073;cg12128839;cg14014955;cg17569124;cg19759481;cg23936031;cg25307665;cg25866143	0	0	1	0	0	0	0	0	0	0	0	1	0	0	2	Bivalent
NM_001362	DIO3	cg00741900;cg01664864;cg15238382;cg15341124;cg18804615	0	0	0	0	0	0	0	1	0	0	0	0	0	1	2	Bivalent
NR_027487	LOC146880	cg01720033;cg02598441;cg05721365;cg08940787;cg13717446;cg15869463;cg16561266	0	0	0	0	0	0	1	0	0	0	1	0	0	0	2	Bivalent
NM_170731	BDNF	cg01642653;cg02527472;cg03167496;cg14589148;cg15462887;cg25381667;cg25457956;cg27351358	0	0	1	0	0	0	0	0	0	0	0	0	0	1	2	Bivalent
NM_001166060	GLRB	cg04006722;cg05263495;cg06436905;cg07084358;cg08712866;cg09688546;cg10999932;cg11163620;cg16269431;cg18344745;cg22065614;cg24568468;cg25911468	0	0	1	0	0	0	0	0	0	0	0	1	0	0	2	Bivalent
NM_005986	SOX1	cg00663972;cg02547394;cg06675478;cg11199713;cg11750165;cg15466862;cg16705627;cg19407095;cg25463470;cg27301032	1	0	0	0	0	0	0	0	0	0	0	0	0	1	2	Bivalent
NM_003391	WNT2	cg01830294;cg06987468;cg07697895;cg15647515;cg17339147;cg20064455;cg27331524	0	0	1	0	0	0	0	0	0	0	0	1	0	0	2	Bivalent
NM_000439	PCSK1	cg00637687;cg00959249;cg02115960;cg07145843;cg09786257;cg17803175;cg18840956;cg23187653	0	0	0	1	0	0	0	0	0	0	0	0	0	1	2	Bivalent
NM_002347	LY6H	cg09528449;cg10821845;cg23484951	0	0	1	0	0	0	0	0	0	0	0	1	0	0	2	Bivalent
NM_182528	C1QL2	cg00690148;cg07212778;cg12891160;cg15931721;cg16849609;cg21858380;cg26530498	0	0	1	0	0	0	0	0	0	0	0	1	0	0	2	Bivalent
NR_036468	CIDEA	cg00590620;cg00851770;cg03245632;cg05700339;cg07204280;cg12072560;cg12395205;cg15063116;cg16727201;cg18309817;cg19883905;cg20950011;cg21114773;cg23754772;cg26974111	0	0	1	0	0	0	0	0	0	0	0	1	0	0	2	Bivalent
NM_001099733	ADCYAP1	cg00128702;cg07211875;cg11773720;cg11850773;cg14200170;cg15458338;cg16457786;cg17059658;cg18319029;cg19962990;cg21438101;cg22388954;cg24287438	0	0	0	1	0	0	0	0	0	0	0	0	0	1	2	Bivalent
NR_027092	LOC284798	cg01505767;cg04299389;cg05446860;cg05908371;cg08941457;cg11724135;cg16265348;cg18009321;cg22273939;cg22645427	0	1	0	0	0	0	0	0	0	0	1	0	0	0	2	Bivalent
NM_001199764	PTPRN	cg06971096;cg10140638;cg16166796	0	1	0	0	0	0	0	0	0	0	0	0	0	1	2	Bivalent
NR_034054	LOC285547	cg05710540;cg06635722;cg19019849;cg19435284;cg22881652	0	0	0	0	0	0	0	0	0	0	1	0	0	1	2	Bivalent
NM_003062	SLIT3	cg01663016;cg07136998;cg09073398;cg11732619;cg14658804;cg15637465;cg15927720;cg17386093;cg26492514	0	0	1	0	0	0	0	0	0	0	0	1	0	0	2	Bivalent
NM_177550	SLC13A5	cg08049640;cg10043253;cg12146546;cg13545212;cg13781853;cg14051161;cg16652063;cg22040627;cg24970327;cg26782108	0	0	1	0	0	0	0	0	0	0	0	1	0	0	2	Bivalent
NM_016192	TMEFF2	cg01808545;cg06008912;cg06856528;cg18221862	0	0	1	0	0	0	0	0	0	0	0	1	0	0	2	Bivalent
NM_003248	THBS4	cg00795341;cg01194371;cg03336086;cg05527185;cg10784386;cg18110483;cg21985690;cg23244289	0	0	1	0	0	0	0	0	0	0	0	1	0	0	2	Bivalent
NM_152721	DOK6	cg12799689;cg15916399;cg23217126;cg23434186;cg27347269	0	0	1	0	0	0	0	0	0	0	0	1	0	0	2	Bivalent
NM_001077243	GRIA4	cg03243226;cg09147777;cg11308643;cg12754421;cg15603568;cg23559689;cg23676682	0	0	0	1	0	0	0	0	0	0	0	0	0	1	2	Bivalent
NM_001004342	TRIM67	cg03350439;cg13881199;cg17102963;cg27504802	0	0	1	0	0	0	0	0	0	0	0	1	0	0	2	Bivalent
NM_004962	GDF10	cg00414835;cg02974931;cg04110601;cg12014008;cg14588178;cg20186445;cg24636477	0	0	0	1	0	0	0	0	0	0	0	0	0	1	2	Bivalent
NM_001044	SLC6A3	cg04210284;cg04598517;cg05030481;cg12882697;cg27037018;cg27348223	0	0	1	0	0	0	0	0	0	0	0	1	0	0	2	Bivalent
NM_001256074	COL25A1	cg01344273;cg02441747;cg04188273;cg05791136;cg06468908;cg07095995;cg10074544;cg11935021;cg11979589;cg18702689;cg19039028;cg22266749;cg23501177;cg25088758;cg26005761	0	0	1	0	0	0	0	0	0	0	0	1	0	0	2	Bivalent
NM_001792	CDH2	cg06090660;cg09313439;cg12208258;cg13464915;cg14312538	0	0	1	0	0	0	0	0	0	0	0	1	0	0	2	Bivalent
NM_080606	BHLHE23	cg06550340;cg14060496;cg14373923;cg21161253;cg26492446;cg27501878	0	0	1	0	0	0	0	0	0	0	0	1	0	0	2	Bivalent
NM_001277115	DNAH11	cg01122187;cg05285902;cg06270661;cg08570341;cg09447578;cg11052958;cg16474297;cg23045935	0	0	1	0	0	0	0	0	0	0	0	1	0	0	2	Bivalent
NM_001220771	IKZF1	cg00547441;cg07589773;cg18810347;cg20078466;cg27633530	0	0	1	0	0	0	0	0	0	0	0	1	0	0	2	Bivalent
NR_038435	HOXD-AS2	cg25820279	0	1	0	0	0	0	0	0	1	0	0	0	0	0	2	Bivalent
NM_006113	VAV3	cg16120828;cg24662718;cg25602490;cg25848557	0	0	1	0	0	0	0	0	0	0	0	1	0	0	2	Bivalent
NM_004946	DOCK2	cg08862890;cg21233722;cg21771173;cg23338503;cg26503653	0	0	0	0	0	0	0	0	0	0	1	0	0	1	2	Bivalent
NM_198403	MMD2	cg19554461;cg21051580;cg26468007;cg27603283	0	0	1	0	0	0	0	0	0	0	0	1	0	0	2	Bivalent
NM_001635	AMPH	cg02383130;cg07926691;cg10293925;cg19875547;cg26122980	0	0	1	0	0	0	0	0	0	0	0	1	0	0	2	Bivalent
NM_021728	OTX2	cg06966811;cg15607672;cg23365739;cg26998537	1	0	0	0	0	0	0	0	1	0	0	0	0	0	2	Bivalent
NM_001276451	DRGX	cg02017257;cg04425920;cg09419352;cg10423771;cg18259520	0	1	0	0	0	0	0	0	0	0	0	0	0	1	2	Bivalent
NM_001168235	FREM3	cg04514249;cg08833778;cg09556043;cg10056356;cg15042811;cg17495719	0	0	1	0	0	0	0	0	0	0	0	1	0	0	2	Bivalent
NM_024692	CLIP4	cg01777397;cg03135351;cg07285673;cg08808128;cg09695033;cg13257636;cg23255835;cg23428985;cg25737323	0	0	0	0	0	0	0	0	0	0	1	1	0	0	2	Bivalent
NR_033867	LOC392232	cg08426444;cg14750277;cg16587952;cg21183256;cg27039662	0	0	0	1	0	0	0	0	0	0	0	1	0	0	2	Bivalent
NM_152399	TMEM155	cg03227184;cg04638468;cg05396987;cg07978472;cg08553437;cg10863741;cg16733855;cg21077559;cg24912438;cg27516568	0	0	1	0	0	0	0	0	0	0	0	1	0	0	2	Bivalent
NM_005429	VEGFC	cg01590753;cg06679347;cg26301788	0	0	1	0	0	0	0	0	0	0	0	1	0	0	2	Bivalent
NM_001198656	AKAP2	cg15083233;cg26288249	0	0	0	1	0	0	0	0	0	0	1	0	0	0	2	Bivalent
NR_039604	MIR2682	cg00091285;cg04282138;cg04763554;cg09022943;cg26924294	0	0	1	0	0	0	0	0	0	0	0	1	0	0	2	Bivalent
NM_001846	COL4A2	cg01956420;cg06659727;cg17541528	0	0	1	0	0	0	0	0	0	0	0	1	0	0	2	Bivalent
NM_006042	HS3ST3A1	cg07480567;cg12503102;cg16861955	0	0	1	0	0	0	0	0	0	0	0	1	0	0	2	Bivalent
NM_001270428	LMO1	cg12740527;cg14205016;cg16096796;cg20555682;cg21204804;cg23730260	0	0	1	0	0	0	0	0	0	0	0	1	0	0	2	Bivalent
NM_016568	RXFP3	cg00981837;cg02341815;cg02640041;cg03909500;cg07832473;cg12238343;cg13349651;cg13912115;cg15408073;cg18689958;cg26390889;cg26986911	0	0	1	0	0	0	0	0	0	0	0	1	0	0	2	Bivalent
NM_198721	COL25A1	cg02441747;cg04188273;cg05791136;cg06468908;cg07095995;cg09926747;cg10074544;cg10237419;cg10756099;cg11935021;cg11979589;cg12210736;cg19039028;cg22266749;cg23501177;cg25088758	0	0	1	0	0	0	0	0	0	0	0	1	0	0	2	Bivalent
NM_001144903	TM6SF1	cg03063639;cg04120171;cg08452658;cg11167100;cg14696396;cg17018527;cg22719913;cg25452071;cg26460092	0	0	1	0	0	0	0	0	0	0	0	1	0	0	2	Bivalent
NR_034103	LINC00966	cg02381539;cg05043349;cg07893575	0	0	0	1	0	0	0	0	0	0	0	0	0	1	2	Bivalent
NM_001129	AEBP1	cg02126753;cg06128448;cg08739576;cg14249876;cg25289803;cg27493928	0	0	1	0	0	0	0	0	0	0	0	1	0	0	2	Bivalent
NM_032961	PCDH10	cg01408654;cg02043159;cg02562431;cg05401965;cg10524033;cg12746059;cg14400886;cg14410319;cg14795750;cg27600205	0	0	1	0	0	0	0	0	0	0	0	1	0	0	2	Bivalent
NM_032503	MCHR2	cg06610484;cg08430325;cg09393254;cg22473637;cg26466587;cg26981309	0	0	0	0	0	0	0	0	1	0	0	0	0	1	2	Bivalent
NM_015696	GPX7	cg11953272;cg16557944;cg18087326;cg20950465;cg22129364;cg26251270	0	0	1	0	0	0	0	0	0	0	1	0	0	0	2	Bivalent
NM_015688	FAM184B	cg01886556;cg02108033;cg02816816;cg04225825;cg05624214;cg07696699;cg15917116;cg17839008;cg18790597;cg25236971;cg27117749;cg27207796	0	0	1	0	0	0	0	0	0	0	0	1	0	0	2	Bivalent
NR_103525	RIPPLY2	cg00270497;cg00575005;cg00772922;cg01965173;cg03818920;cg07283833;cg08154348;cg16528511;cg18206017;cg19736503;cg23215729;cg26880055	0	0	1	0	0	0	0	0	0	0	0	1	0	0	2	Bivalent
NM_152764	MEIOB	cg01422476;cg03467725;cg05041351;cg07775371;cg08734647	0	0	1	0	0	0	0	0	0	0	0	1	0	0	2	Bivalent
NM_015209	KAZN	cg03391684;cg05006349;cg06940705;cg15007156;cg22396057;cg25104105	0	0	1	0	0	0	0	0	0	0	0	1	0	0	2	Bivalent
NM_001999	FBN2	cg05209584;cg06993118;cg12940822;cg17958315;cg25084878	0	0	1	0	0	0	0	0	0	0	0	1	0	0	2	Bivalent
NM_001082534	CA10	cg07111868;cg07398767;cg07723251;cg08605326;cg13125157;cg20552747;cg21385821;cg22855255;cg25592977	0	0	0	1	0	0	0	0	0	0	0	0	0	1	2	Bivalent
NR_038861	LINC00617	cg04245645;cg18627235;cg24101492	0	0	1	0	0	0	0	0	0	0	0	1	0	0	2	Bivalent
NM_007050	PTPRT	cg03403065;cg07167168;cg08413157;cg13168820;cg17859110;cg21672843	0	0	1	0	0	0	0	0	0	0	0	1	0	0	2	Bivalent
NR_024356	FBLL1	cg10084902;cg10591652;cg13954457;cg14743594;cg21662506;cg24886267;cg25482900	0	0	1	0	0	0	0	0	0	0	0	1	0	0	2	Bivalent
NM_005264	GFRA1	cg03503087;cg08194313;cg09146197;cg11390957;cg12087643;cg13346013;cg13890706;cg18672939;cg23898073;cg25022687;cg25351565;cg25617725;cg27341926	0	0	1	0	0	0	0	0	0	0	0	1	0	0	2	Bivalent
NM_001845	COL4A1	cg01956420;cg06659727;cg13596497;cg17541528	0	0	1	0	0	0	0	0	0	0	0	1	0	0	2	Bivalent
NM_001127896	CHST8	cg06399302;cg16190732;cg19594305;cg24790628;cg26565021;cg27058486	0	0	1	0	0	0	0	0	0	0	0	1	0	0	2	Bivalent
NM_001279	CIDEA	cg00590620;cg00851770;cg03245632;cg05700339;cg07204280;cg12072560;cg12395205;cg14976646;cg15063116;cg16727201;cg18309817;cg19883905;cg20950011;cg21114773;cg23754772;cg26974111	0	0	1	0	0	0	0	0	0	0	0	1	0	0	2	Bivalent
NM_001080396	FAM155A	cg04607400;cg06446668;cg10118210;cg19839798;cg25985659	0	0	1	0	0	0	0	0	0	0	0	1	0	0	2	Bivalent
NM_001146339	VSTM2B	cg04711162;cg18777119	0	0	1	0	0	0	0	0	0	0	0	1	0	0	2	Bivalent
NM_001242702	MKX	cg05381746;cg05694245;cg08696727;cg09713234;cg11419506;cg11825621;cg16033053;cg17389504;cg17910121	0	0	1	0	0	0	0	0	0	0	0	1	0	0	2	Bivalent
NM_015052	HECW1	cg01971676;cg03004999;cg05380503;cg08039116;cg13298841;cg17438849;cg22795470;cg25803632	0	0	1	0	0	0	0	0	0	0	0	1	0	0	2	Bivalent
NM_199355	ADAMTS18	cg02186542;cg03238797;cg07568194	0	0	1	0	0	0	0	0	0	0	0	1	0	0	2	Bivalent
NR_029670	MIR124-3	cg01052879;cg03387135;cg06660530;cg15028514;cg15699267;cg18627360;cg18772588;cg19267861;cg20213228;cg20277905	0	0	1	0	0	0	0	0	0	0	0	1	0	0	2	Bivalent
NM_015267	CUX2	cg01638592;cg09229912;cg17190608	0	0	1	0	0	0	0	0	0	0	0	1	0	0	2	Bivalent
NM_001267	CHAD	cg05180443;cg06818777;cg06958829;cg10421979;cg13764778;cg15506894;cg15880760;cg17890928;cg19046826;cg19961043;cg22627841;cg25792518	0	0	0	1	0	0	0	0	0	0	0	0	0	1	2	Bivalent
NM_172103	EYA4	cg01162672;cg01328892;cg02446647;cg05062333;cg05085230;cg05493394;cg06132028;cg06181518;cg08712932;cg11518846;cg11664500;cg11942956;cg14017655;cg14270292;cg14287112;cg14343214;cg16347317;cg17838029;cg20286200;cg20787173;cg20980055;cg22871668;cg24176563;cg26449787;cg26656135	0	0	1	0	0	0	0	0	0	0	0	1	0	0	2	Bivalent
NM_152774	TMEM196	cg08991339;cg11124364;cg11876022;cg18505401;cg19037304;cg21657955;cg23181844;cg27341472	0	0	1	0	0	0	0	0	0	0	0	1	0	0	2	Bivalent
NM_013372	GREM1	cg08495115;cg10429922;cg21296230	1	0	0	1	0	0	0	0	0	0	0	0	0	0	2	Bivalent
NM_001145080	C17orf104	cg02932314;cg08496953;cg12127472;cg12781700;cg15000379;cg17269633;cg21095561;cg22190438;cg22605919	1	0	0	0	0	0	1	0	0	0	0	0	0	0	2	Bivalent
NM_031895	CACNG8	cg06116236;cg22049569;cg23752563;cg24415208;cg26858144	0	0	0	1	0	0	0	0	0	0	0	0	0	1	2	Bivalent
NM_001242794	SNAP91	cg03815358;cg05384102;cg09227138;cg15950068;cg16334314;cg17767285;cg18213472;cg19671533;cg20631014;cg21688264;cg24638849;cg24842733	0	0	1	0	0	0	0	0	0	0	0	1	0	0	2	Bivalent
NR_034148	LINC00900	cg01033865;cg01679328;cg05299387;cg05578358;cg09077752;cg12918457;cg13839457;cg15630907;cg23651826;cg24186674;cg24266670	0	0	1	0	0	0	0	0	0	0	0	1	0	0	2	Bivalent
NM_173508	SLC35F3	cg05051043;cg09424759;cg22685369;cg25437385	0	0	1	0	0	0	0	0	0	0	0	1	0	0	2	Bivalent
NM_001178065	CASR	cg05937969;cg07607922;cg07629454;cg25729826	0	0	1	0	0	0	0	0	0	0	0	1	0	0	2	Bivalent
NM_001272088	SLC1A6	cg04704053;cg15967847;cg18434718;cg25936054	0	0	1	0	0	0	0	0	0	0	0	1	0	0	2	Bivalent
NM_032291	SGIP1	cg00089915;cg02994349;cg19406367;cg25203031;cg27558095	0	0	0	0	0	0	0	0	1	0	0	0	0	1	2	Bivalent
NM_001080436	WTIP	cg15409931;cg24916013	0	0	1	0	0	0	0	0	0	0	0	1	0	0	2	Bivalent
NR_028044	IGF2-AS	cg02835822;cg06460568;cg09694722;cg10659464;cg13756879;cg13791131;cg15393937;cg17037101;cg19371526;cg19443075;cg22287492;cg23030069;cg23676551;cg23905216;cg25163476;cg25574024	0	0	1	0	0	0	0	0	0	0	0	1	0	0	2	Bivalent
NM_002531	NTSR1	cg00254133;cg01539036;cg02658437;cg03567830;cg05295038;cg08678514;cg09893588;cg11877251	0	0	1	0	0	0	0	0	0	0	0	1	0	0	2	Bivalent
NM_001082533	CA10	cg07111868;cg07398767;cg08605326;cg13125157;cg20552747;cg21328033;cg22855255;cg25592977	0	0	0	1	0	0	0	0	0	0	0	0	0	1	2	Bivalent
NM_178161	PTF1A	cg11438428;cg17076890;cg18759960;cg18920423;cg20014049;cg22746058;cg24767148	0	0	1	1	0	0	0	0	0	0	0	0	0	0	2	Bivalent
NM_000138	FBN1	cg03535663;cg10480343;cg15385562;cg19908534;cg22535307	0	0	1	0	0	0	0	0	0	0	0	1	0	0	2	Bivalent
NM_000514	GDNF	cg02450613;cg04439218;cg07128111;cg07442479;cg14492800;cg16138150;cg18237607;cg25602684;cg26295057;cg26789779	0	0	1	0	0	0	0	0	0	0	0	1	0	0	2	Bivalent
NR_033938	LINC00605	cg01363714;cg01556502;cg06680243;cg10397678;cg23418339	1	0	0	0	0	0	0	0	0	0	0	0	0	1	2	Bivalent
NM_001166061	GLRB	cg04006722;cg05263495;cg06436905;cg07084358;cg08712866;cg09688546;cg10999932;cg11163620;cg16269431;cg18344745;cg22065614;cg24568468;cg25911468	0	0	1	0	0	0	0	0	0	0	0	1	0	0	2	Bivalent
NM_005285	NPBWR1	cg01559663;cg02115041;cg02237470;cg06528306;cg07770968;cg15531403;cg16330450;cg18755296	0	0	1	0	0	0	0	0	0	0	0	1	0	0	2	Bivalent
NM_005315	GSC2	cg06695663;cg08430009;cg11985360;cg20209308;cg23774356;cg25559313;cg26599006	0	0	1	0	0	0	0	0	0	0	0	1	0	0	2	Bivalent
NM_006426	DPYSL4	cg05652533;cg07295678;cg08753373;cg12109455	0	0	1	0	0	0	0	0	0	0	0	1	0	0	2	Bivalent
NM_005458	GABBR2	cg13434352;cg18507707	0	0	1	0	0	0	0	0	0	0	0	1	0	0	2	Bivalent
NM_182522	FAM19A4	cg03427298;cg05893614;cg08038353;cg09868336;cg12219082;cg12412079;cg12417685;cg13921352;cg20375342;cg23967169	0	0	1	0	0	0	0	0	0	0	0	1	0	0	2	Bivalent
NM_001855	COL15A1	cg12933162;cg13952031;cg18115656	0	0	1	0	0	0	0	0	0	0	0	1	0	0	2	Bivalent
NM_003012	SFRP1	cg01495122;cg04255616;cg10406295;cg15839448;cg17816908;cg21517947;cg22418909;cg24319902	0	0	1	0	0	0	0	0	0	0	0	1	0	0	2	Bivalent
NM_000831	GRIK3	cg08004425;cg13272644;cg20168230	0	0	0	0	0	0	0	0	0	0	0	1	0	1	2	Bivalent
NM_001040179	MCHR2	cg06610484;cg08430325;cg09393254;cg22473637;cg26466587;cg26981309	0	0	0	0	0	0	0	0	1	0	0	0	0	1	2	Bivalent
NM_024812	BAALC	cg06399148;cg10163483;cg10918202;cg11318251;cg14284952	0	0	1	0	0	0	0	0	0	0	0	1	0	0	2	Bivalent
NM_175733	SYT9	cg02269161;cg03226737;cg08185661;cg14243481;cg16437728;cg18560328;cg22723056;cg26945996	0	0	1	0	0	0	0	0	0	0	0	1	0	0	2	Bivalent
NM_057168	WNT16	cg05470554;cg09857513;cg14448169;cg16868298;cg18579879;cg19617672;cg25608490;cg26690075	0	0	0	0	0	0	0	1	0	0	0	0	0	1	2	Bivalent
NM_198461	LONRF2	cg07304692;cg08017756;cg14675211;cg23977631	0	0	1	0	0	0	0	0	0	0	0	1	0	0	2	Bivalent
NM_020856	TSHZ3	cg06196755	0	0	1	0	0	0	0	0	0	0	0	1	0	0	2	Bivalent
NM_007084	SOX21	cg01212887;cg02736420;cg15482872;cg16201674;cg23111830;cg24051481;cg27442308	0	0	1	0	0	0	0	0	0	0	0	1	0	0	2	Bivalent
NM_018008	FEZF2	cg06423920;cg11374425;cg14651453;cg15812348;cg19227130;cg19629292;cg24705960	0	0	1	0	0	0	0	0	0	0	0	1	0	0	2	Bivalent
NM_005586	MDFI	cg01350077;cg02914379;cg05345286;cg08625380;cg27200446	0	0	1	0	0	0	0	0	0	0	0	1	0	0	2	Bivalent
NM_178864	NPAS4	cg02055483;cg09835239;cg13215078;cg14699728;cg22134325;cg23484234	0	0	0	1	0	0	0	0	0	0	0	0	0	1	2	Bivalent
NM_030651	PRRT1	cg00403498;cg02429905;cg04749507;cg12387154;cg12602633;cg13035743;cg17161421;cg17218813;cg20914572;cg21037008	0	0	0	0	0	0	0	0	1	0	0	0	0	1	2	Bivalent
NR_045572	CHL1	cg03940684;cg04748834;cg10603275;cg18277764;cg19505136;cg21145524;cg24307799	0	0	1	0	0	0	0	0	0	0	0	0	0	1	2	Bivalent
NM_004248	PRLHR	cg02531437;cg02819347;cg07098752;cg10661615;cg12614318;cg15493780;cg16196812;cg18534345;cg19403534;cg20624923	0	1	0	0	0	0	0	0	0	0	0	0	0	1	2	Bivalent
NM_001143774	PHYHIPL	cg01037890;cg06879152;cg08641881;cg13503413;cg23712342;cg24073466;cg24563570;cg24761366	1	0	1	0	0	0	0	0	0	0	0	0	0	0	2	Bivalent
NM_007038	ADAMTS5	cg08190291;cg13601496;cg15237494;cg18895813;cg19523085;cg21646598;cg23986671	0	0	1	0	0	0	0	0	0	0	0	1	0	0	2	Bivalent
NM_152898	FERD3L	cg05328547;cg07270153;cg10043037;cg10477621;cg11241627;cg23054426;cg23536473;cg25691167	0	1	0	0	0	0	0	0	0	0	0	0	0	1	2	Bivalent
NM_001258416	ARHGAP20	cg03110368;cg03532274;cg04282419;cg04417028;cg04974587;cg06106428;cg08012199;cg13643376;cg14652031;cg26135012	0	0	1	0	0	0	0	0	0	0	0	1	0	0	2	Bivalent
NM_001127895	CHST8	cg06399302;cg16190732;cg19594305;cg24790628;cg26565021;cg27058486	0	0	1	0	0	0	0	0	0	0	0	1	0	0	2	Bivalent
NM_001201465	NETO1	cg03524083;cg18448581;cg26186727	0	0	0	1	0	0	0	0	0	0	0	0	0	1	2	Bivalent
NM_022068	PIEZO2	cg00525823;cg03602280;cg10023530;cg10567810;cg12951849;cg22374057;cg23556443;cg24362812	0	0	0	1	0	0	0	0	0	0	0	0	0	1	2	Bivalent
NM_024768	EFCC1	cg00112465;cg02604524;cg11641611;cg15087448;cg19611175;cg20506715	0	0	1	0	0	0	0	0	0	0	0	1	0	0	2	Bivalent
NM_023943	TMEM108	cg00871560;cg02745211;cg05075118;cg06288251;cg09090724;cg14423735;cg17385936;cg18115215;cg24198558;cg26099138;cg26143045	0	0	1	0	0	0	0	0	0	0	0	1	0	0	2	Bivalent
NM_001160007	NRG1	cg08695336;cg17457560;cg19162158;cg25230074	0	0	1	0	0	0	0	0	0	0	0	1	0	0	2	Bivalent
NM_001278064	GRM1	cg06015218;cg07218663;cg08076125;cg08958294;cg09558195;cg13371951;cg13722123;cg21714266	0	0	0	1	0	0	0	0	0	0	0	0	0	1	2	Bivalent
NM_001165972	NRG3	cg02690638;cg04529370;cg05316043	0	0	1	0	0	0	0	0	0	0	0	1	0	0	2	Bivalent
NM_000651	CR1	cg02588107;cg05825950;cg10021878;cg14726637;cg17147317;cg18147366	0	0	1	0	0	0	0	0	0	0	0	1	0	0	2	Bivalent
NM_001651	AQP5	cg03020208;cg08266366;cg15336765;cg26328335	0	0	1	0	0	0	0	0	0	0	0	1	0	0	2	Bivalent
NM_006988	ADAMTS1	cg00472814	0	0	1	0	0	0	0	0	0	0	0	1	0	0	2	Bivalent
NM_003055	SLC18A3	cg02728050;cg11389172;cg16494192;cg24109980	0	0	1	0	0	0	0	0	0	0	0	1	0	0	2	Bivalent
NM_020225	STOX2	cg01758805;cg06846310;cg07089892;cg11354594;cg12843518;cg14711866;cg20026798;cg23649435;cg25882830	0	0	1	0	0	0	0	0	0	0	0	1	0	0	2	Bivalent
NM_004540	NCAM2	cg02842227;cg12426234;cg15681537;cg17475987	0	0	1	0	0	0	0	0	0	0	0	1	0	0	2	Bivalent
NM_152447	LRFN5	cg13526007;cg23955431;cg26967167	0	0	1	0	0	0	0	0	0	0	0	1	0	0	2	Bivalent
NM_201433	GAS7	cg25116216	0	0	1	0	0	0	0	0	0	0	0	1	0	0	2	Bivalent
NM_001123364	METTL24	cg10259748;cg20737185;cg20931973;cg25146017	0	0	1	0	0	0	0	0	0	0	0	1	0	0	2	Bivalent
NM_001009994	RIPPLY2	cg00270497;cg00575005;cg00772922;cg01965173;cg03818920;cg07283833;cg08154348;cg16528511;cg18206017;cg23215729;cg26880055	0	0	1	0	0	0	0	0	0	0	0	1	0	0	2	Bivalent
NM_004787	SLIT2	cg08428452;cg13078140;cg13281139;cg15469350;cg18972811	0	0	1	0	0	0	0	0	0	0	0	1	0	0	2	Bivalent
NM_001197294	DPYSL3	cg02010196;cg06338421;cg07432626;cg07723130;cg10162019;cg26636193	0	0	1	0	0	0	0	0	0	0	0	1	0	0	2	Bivalent
NM_182546	VSTM2A	cg02910208;cg03775422;cg03817667;cg04024095;cg08532834;cg14304469;cg15164958;cg19868631;cg21629006;cg22131234;cg25528143	0	0	1	0	0	0	0	0	0	0	0	1	0	0	2	Bivalent
NR_038840	LINC00693	cg00380860;cg03553587;cg08700032;cg25377802	0	0	1	0	0	0	0	0	0	0	0	1	0	0	2	Bivalent
NM_018401	STK32B	cg08323075;cg10351287;cg11682071;cg16333992;cg18827954;cg23300732	0	0	1	0	0	0	0	0	0	0	0	1	0	0	2	Bivalent
NM_015463	CNRIP1	cg00020052;cg04020079;cg05894910;cg08157672;cg10908369;cg15313459;cg21216118	0	0	1	0	0	0	0	0	0	0	0	1	0	0	2	Bivalent
NM_003027	SH3GL3	cg01667646;cg04779631;cg09201151;cg11797092;cg21145136;cg22946150;cg26215967;cg27021357;cg27648738	0	0	1	0	0	0	0	0	0	0	0	1	0	0	2	Bivalent
NM_001098500	KIAA1217	cg04154276;cg06806958;cg08704681;cg13882278;cg15406683;cg24487076	0	0	1	0	0	0	0	0	0	0	0	1	0	0	2	Bivalent
NM_005559	LAMA1	cg03159124;cg07846220;cg12072964;cg14950072;cg18764577;cg19909349	0	0	1	0	0	0	0	0	0	0	0	1	0	0	2	Bivalent
NM_133448	TMEM132D	cg03469054;cg11160362;cg12122146;cg23266743;cg23891360	0	0	0	1	0	0	0	0	0	0	0	0	0	1	2	Bivalent
NM_001029880	SFMBT2	cg02866454;cg03031609;cg07423571;cg12767281;cg16818993;cg23056729;cg25433188;cg26978668	0	0	1	0	0	0	0	0	0	0	0	1	0	0	2	Bivalent
NR_045481	LOC644248	cg01966878;cg06632027;cg06848047;cg14346243;cg15133208;cg20003494;cg26578617	0	1	0	0	0	0	0	0	0	0	0	0	0	1	2	Bivalent
NM_001256718	SNAP91	cg15950068;cg16334314;cg21688264;cg24190603	0	0	1	0	0	0	0	0	0	0	0	1	0	0	2	Bivalent
NM_173081	ARMC3	cg06560760;cg08839858;cg11673092;cg11710969;cg15193782;cg19523082;cg19542987;cg22631555	0	0	1	0	0	0	0	0	0	0	0	1	0	0	2	Bivalent
NM_002891	RASGRF1	cg13937040;cg14510404;cg15156078;cg16154416;cg17507573;cg17821321;cg19431448;cg20574415;cg20973720;cg24733262	0	0	1	0	0	0	0	0	0	0	0	1	0	0	2	Bivalent
NM_001270805	SYT6	cg01567634;cg05368341;cg15976388;cg19304150;cg21920775	0	0	1	0	0	0	0	0	0	0	0	1	0	0	2	Bivalent
NM_052867	NALCN	cg01105058;cg04117435;cg05673756;cg10774877;cg11621911;cg18115507;cg18686498;cg23056157;cg25201811;cg25670685	0	0	1	0	0	0	0	0	0	0	0	1	0	0	2	Bivalent
NR_073397	ERICH1-AS1	cg01200640;cg01369750	0	0	0	0	0	0	0	0	0	0	0	1	0	1	2	Bivalent
NM_178565	RSPO2	cg00910695;cg00997551;cg04050867;cg04549460;cg13177747;cg13700897;cg14733048;cg16845394;cg22600043;cg24807106	0	0	1	0	0	0	0	0	0	0	0	1	0	0	2	Bivalent
NM_173054	RELN	cg06226283;cg07482935;cg13566610;cg17923358;cg18011364;cg19478298	0	0	1	0	0	0	0	0	0	0	0	1	0	0	2	Bivalent
NR_024237	LOC100132111	cg05021743;cg12749132;cg15015892;cg19255477;cg22604218;cg26426745	0	0	0	0	0	0	0	0	1	0	0	0	0	1	2	Bivalent
NM_004473	FOXE1	cg02157015;cg13827859;cg15802898;cg19292008	0	0	1	0	0	0	0	0	0	0	0	1	0	0	2	Bivalent
NR_038877	LOC286189	cg03357798;cg13407456;cg14148862;cg22001496;cg22601348;cg24280540;cg26809497	0	0	1	0	0	0	0	0	0	0	0	1	0	0	2	Bivalent
NM_004352	CBLN1	cg03389653;cg08464190;cg09792926;cg16573782	1	0	0	1	0	0	0	0	0	0	0	0	0	0	2	Bivalent
NM_030623	SPHKAP	cg00423153;cg04072323;cg06092815;cg10959353;cg12525474;cg19269666;cg24333629	0	0	0	1	0	0	0	0	0	0	0	0	0	1	2	Bivalent
NM_001206957	RASSF1	cg00777121;cg03297783;cg04540383;cg04743654;cg06172942;cg08047457;cg12966367;cg13872831;cg21554552;cg25486143;cg25747192;cg27569446	0	1	0	0	0	0	0	0	0	0	0	0	0	1	2	Bivalent
NM_130797	DPP6	cg02485566;cg02855576;cg09124223;cg15549927;cg18940047	0	0	0	1	0	0	0	0	0	0	0	0	0	1	2	Bivalent
NM_173812	DPY19L2	cg00845942;cg02660347;cg04455164;cg06995920;cg10967101;cg17477445;cg21346925;cg23148701;cg24709718	0	0	1	0	0	0	0	0	0	0	0	1	0	0	2	Bivalent
NM_000474	TWIST1	cg00240432;cg01202666;cg09799658;cg10420952;cg11147786;cg12926104;cg14782672;cg17839237;cg20052718;cg22498251;cg24446548	0	0	1	0	0	0	0	0	0	0	0	1	0	0	2	Bivalent
NM_194286	SRRM4	cg01070209;cg01944655;cg09562322;cg11670651;cg12878812;cg14135814;cg14843800;cg24809072	0	0	1	0	0	0	0	0	0	0	0	1	0	0	2	Bivalent
NM_004291	CARTPT	cg01187920;cg02762440;cg08351336;cg20798152;cg22517388;cg23300372;cg26146287;cg26371061	0	1	0	0	0	0	0	0	0	0	0	0	0	1	2	Bivalent
NM_007374	SIX6	cg06785999;cg08132837;cg14186066;cg14611174;cg18639233;cg19456540;cg20585530	1	0	0	1	0	0	0	0	0	0	0	0	0	0	2	Bivalent
NR_103441	GDNF-AS1	cg02450613;cg07128111;cg07715201;cg18121355;cg18237607;cg21319053	0	0	1	0	0	0	0	0	0	0	0	1	0	0	2	Bivalent
NR_046096	LOC283692	cg01645753;cg04184836;cg16043144;cg19665362;cg24319381;cg27578811	0	0	1	0	0	0	0	0	0	0	0	1	0	0	2	Bivalent
NM_030965	ST6GALNAC5	cg04077662;cg06201642;cg09511846;cg13463054;cg13823136;cg15100100;cg16966815;cg27519691	0	0	1	0	0	0	0	0	0	0	0	1	0	0	2	Bivalent
NM_001206920	SLC35F4	cg08826251;cg12454814;cg14866863;cg23318063;cg26118906	0	0	0	1	0	0	0	0	0	0	0	1	0	0	2	Bivalent
NR_073466	ERICH1-AS1	cg01200640;cg01369750	0	0	0	0	0	0	0	0	0	0	0	1	0	1	2	Bivalent
NM_012159	FBXL21	cg01283246;cg13557668;cg16154332;cg20924470;cg25215292;cg26664161	0	0	1	0	0	0	0	0	0	0	0	1	0	0	2	Bivalent
NR_027091	LOC284798	cg01505767;cg04299389;cg05446860;cg05908371;cg08941457;cg11724135;cg16265348;cg18009321;cg22273939;cg22645427	0	1	0	0	0	0	0	0	0	0	1	0	0	0	2	Bivalent
NM_004734	DCLK1	cg12328333;cg24239329;cg25012919;cg25724283;cg25943503	0	0	1	0	0	0	0	0	0	0	0	1	0	0	2	Bivalent
NM_198992	SYT10	cg10658542;cg18158990;cg23950724;cg26300652;cg27315191	0	0	1	0	0	0	0	0	0	0	0	1	0	0	2	Bivalent
NM_000912	OPRK1	cg07303244;cg09816500;cg09999109;cg11701471;cg13405783;cg16491617;cg25614094;cg25990647	0	0	1	0	0	0	0	0	0	0	0	1	0	0	2	Bivalent
NM_001105541	NEFM	cg02002551;cg02106941;cg03169018;cg04118306;cg17078116;cg19677607;cg20585869;cg22562942;cg26980244	0	1	0	0	0	0	0	0	0	0	0	0	0	1	2	Bivalent
NM_001195639	C8orf34	cg03357798;cg08448589;cg13407456;cg20207219	0	0	1	0	0	0	0	0	0	0	0	1	0	0	2	Bivalent
NM_016358	IRX4	cg02641288;cg03963198;cg07733257;cg07882671;cg14507560;cg24876960;cg24937747	0	0	1	0	0	0	0	0	0	0	0	1	0	0	2	Bivalent
NM_001142333	RBFOX1	cg01610605;cg02230017;cg03586879;cg03934713;cg08545287;cg19378133	0	0	0	1	0	0	0	0	0	0	0	0	0	1	2	Bivalent
NM_002141	HOXA4	cg03724423;cg04317399;cg04321618;cg06942814;cg07317062;cg08657492;cg11015251;cg11410718;cg14359292;cg16651126;cg17457637;cg19142026;cg22997113;cg23884241	0	1	0	0	0	0	0	0	0	0	0	0	0	1	2	Bivalent
NM_004621	TRPC6	cg03411507;cg04553838;cg07013734;cg11016563;cg14186937;cg18137040;cg23644960;cg23650423	0	0	1	0	0	0	0	0	0	0	0	1	0	0	2	Bivalent
NM_002508	NID1	cg00095594;cg02957057;cg04507775;cg04837025;cg07157830;cg16549308	0	0	1	0	0	0	0	0	0	0	0	1	0	0	2	Bivalent
NM_014334	FRRS1L	cg17641904	0	0	1	0	0	0	0	0	0	0	0	1	0	0	2	Bivalent
NM_001163560	MEIOB	cg01422476;cg03467725;cg05041351;cg07775371;cg08734647	0	0	1	0	0	0	0	0	0	0	0	1	0	0	2	Bivalent
NM_004717	DGKI	cg00070680;cg04425632;cg08245274;cg08434234;cg18324707;cg22428147	0	0	1	0	0	0	0	0	0	0	0	1	0	0	2	Bivalent
NM_001111270	ARHGEF25	cg00331508;cg03309176;cg06556702;cg11211563;cg14024415;cg15409097;cg22610645;cg24324354	0	1	0	0	0	0	0	0	0	0	0	0	0	1	2	Bivalent
NR_015358	LINC00643	cg01101865;cg01613638;cg01779765;cg01866038;cg03479715;cg05173737;cg07471209;cg10227327;cg14926717;cg15897970;cg18655384	0	0	1	0	0	0	0	0	0	0	0	1	0	0	2	Bivalent
NM_153717	EVC	cg01333350;cg03881544;cg06918887;cg16418810;cg17460447;cg21210758;cg25213928;cg26875219	0	0	1	0	0	0	0	0	0	0	0	1	0	0	2	Bivalent
NM_001098796	TOX2	cg03011535;cg04369341;cg06779449;cg06962944;cg10900455;cg11319389;cg13088368;cg13459498;cg19593767;cg25362630	0	0	1	0	0	0	1	0	0	0	0	0	0	0	2	Bivalent
NM_001145453	GFRA1	cg03503087;cg04983142;cg08194313;cg13346013;cg13890706;cg18672939;cg19236679;cg23898073;cg25022687;cg25351565;cg25617725;cg27341926	0	0	1	0	0	0	0	0	0	0	0	1	0	0	2	Bivalent
NM_213606	SLC16A12	cg02079377;cg02584459;cg04349243;cg09186006;cg11832210;cg11960629;cg12005098;cg18624636;cg18624900;cg22901008;cg24305584	0	0	1	0	0	0	0	0	0	0	0	1	0	0	2	Bivalent
NM_053277	CLIC6	cg10722799;cg11528328;cg16057826;cg17935217;cg18074297;cg20343048	0	0	0	0	0	0	0	0	1	0	0	0	0	1	2	Bivalent
NM_001204080	ANKS1B	cg03609960;cg11554266	0	0	1	0	0	0	0	0	0	0	0	1	0	0	2	Bivalent
NM_001145194	C18orf42	cg00197517;cg00247557;cg03250019;cg03278146;cg13671919;cg23234640;cg23811789;cg25349154	0	0	1	1	0	0	0	0	0	0	0	0	0	0	2	Bivalent
NM_173528	C15orf26	cg09236163;cg14380111;cg18028999;cg18054026;cg18837035;cg25029264;cg26546864;cg27045999;cg27419860	0	0	1	1	0	0	0	0	0	0	0	0	0	0	2	Bivalent
NM_002590	PCDH8	cg01382137;cg03315215;cg12545687;cg14171414;cg16027761;cg17535595;cg19456622;cg19712603;cg20366906;cg22763718;cg24560494;cg27360326	1	0	1	0	0	0	0	0	0	0	0	0	0	0	2	Bivalent
NM_001201427	DAAM2	cg01499172;cg03698948;cg06895295;cg14135551;cg17868910;cg22174742	0	0	1	0	0	0	0	0	0	0	0	1	0	0	2	Bivalent
NM_001278344	ACTN2	cg10372476;cg11215976;cg14932016;cg16853982;cg18770350;cg20482698;cg21376883	0	1	0	0	0	0	0	0	0	1	0	0	0	0	2	Bivalent
NM_032825	ZNF382	cg02587316;cg04332534;cg05020604;cg18630667;cg19406736;cg22517995;cg25397945;cg27658967	0	0	0	1	0	0	0	0	0	0	0	0	1	0	2	Bivalent
NM_021165	FAM5B	cg04209911;cg06758591;cg13589108;cg13685951;cg16123101;cg19993589;cg20846447	0	0	1	0	0	0	0	0	0	0	0	1	0	0	2	Bivalent
NM_001105528	CCDC178	cg05245861;cg05332960	0	0	1	0	0	0	0	0	0	0	0	1	0	0	2	Bivalent
NM_198995	CCDC178	cg00625334;cg03478497;cg05245861;cg05332960;cg05994094;cg18382305;cg20615848;cg20820063	0	0	1	0	0	0	0	0	0	0	0	1	0	0	2	Bivalent
NM_001113498	MDGA2	cg09155219;cg19672997	0	0	0	1	0	0	0	0	0	0	0	0	0	1	2	Bivalent
NM_001243	TNFRSF8	cg00653960;cg01966612;cg05121790;cg07166679;cg14834850;cg17897879;cg19896198	0	0	1	0	0	0	0	0	0	0	0	1	0	0	2	Bivalent
NR_026836	TRHDE-AS1	cg00580978;cg01030121;cg04640250;cg09972192;cg11054631;cg13099890;cg13663218;cg19188182;cg27579953	0	0	1	0	0	0	0	0	0	0	0	1	0	0	2	Bivalent
NM_001278301	EPHA6	cg02055132;cg05827732;cg07254054;cg09301294;cg11410023;cg15093079;cg15405439;cg26364205	0	0	1	0	0	0	0	0	0	0	0	1	0	0	2	Bivalent
NM_005169	PHOX2A	cg01670677;cg02910180;cg04543008;cg05093169;cg08876932;cg11334771;cg16922279;cg18722841;cg19651694;cg24530250	0	0	0	0	0	0	0	0	0	0	0	1	0	1	2	Bivalent
NM_080473	GATA5	cg02484469;cg08568720;cg11982072;cg12664464;cg13845982;cg14831174;cg14980983;cg15749748;cg16714055;cg16919517;cg18278265;cg20265733;cg24320612;cg24500900	0	0	1	0	0	0	0	0	0	0	0	1	0	0	2	Bivalent
NM_004115	FGF14	cg09896622;cg18761450;cg25317585	0	0	1	0	0	0	0	0	0	0	0	1	0	0	2	Bivalent
NM_207413	FAM150A	cg02490516;cg07076175;cg09442654;cg10094616;cg13451025;cg17162024;cg22862746	0	0	1	0	0	0	0	0	0	0	0	1	0	0	2	Bivalent
NM_000217	KCNA1	cg03929977;cg06652199;cg09487611;cg10363246;cg10569606;cg10767336;cg11388325;cg12080391;cg12908522;cg15543616;cg19651132;cg20392607	0	0	1	0	0	0	0	0	0	0	0	1	0	0	2	Bivalent
NM_001001557	GDF6	cg00421139;cg05552220;cg05701791;cg19939997;cg21859781	0	0	1	0	0	0	0	0	0	0	0	1	0	0	2	Bivalent
NR_038384	LOC728012	cg01189783;cg06610484;cg09393254;cg22473637;cg26466587;cg26981309	0	0	0	1	0	0	0	0	0	0	0	0	0	1	2	Bivalent
NM_021076	NEFH	cg02994956;cg10188823;cg16042149;cg18129621;cg22766080;cg23842255	1	0	1	0	0	0	0	0	0	0	0	0	0	0	2	Bivalent
NM_052846	EMILIN3	cg00273068;cg07609788;cg08463758;cg13919438;cg18587340;cg23226129;cg25481073	0	0	1	0	0	0	0	0	0	0	0	1	0	0	2	Bivalent
NR_029692	MIR9-3	cg01882870;cg03082580;cg12530503;cg13888600;cg21529323;cg25950235	0	0	1	0	0	0	0	0	0	0	0	1	0	0	2	Bivalent
NM_001130684	GUCY1A3	cg01458504;cg09912350;cg17974378;cg22643435;cg23912454;cg27662483	0	0	1	0	0	0	0	0	0	0	0	1	0	0	2	Bivalent
NM_001242792	SNAP91	cg05384102;cg09227138;cg15950068;cg16334314;cg17767285;cg18213472;cg19671533;cg20631014;cg21688264;cg24190603;cg24842733	0	0	1	0	0	0	0	0	0	0	0	1	0	0	2	Bivalent
NM_001042693	FAM159A	cg00065957;cg09068158;cg11279444;cg17088631;cg18146843;cg22434763	0	0	1	0	0	0	0	0	0	0	0	0	1	0	2	Bivalent
NM_001202482	CRHR2	cg01718447;cg02712145;cg04863452;cg04922810;cg04923928;cg07658503;cg13094036;cg14896516;cg21773872;cg24610236	0	0	1	0	0	0	0	0	0	0	0	1	0	0	2	Bivalent
NM_003412	ZIC1	cg01227537;cg01610632;cg02519751;cg02647941;cg04738965;cg05073035;cg05700079;cg14456683;cg14741939;cg17280346;cg18424634	1	0	0	1	0	0	0	0	0	0	0	0	0	0	2	Bivalent
NR_029839	MIR34B	cg01192900;cg05281603;cg18515591;cg21881253;cg22879515;cg23211240;cg24041078;cg26561785	0	0	1	0	0	0	0	0	0	0	0	1	0	0	2	Bivalent
NM_013381	TRHDE	cg02511156;cg06622999;cg13663218	0	0	1	0	0	0	0	0	0	0	0	1	0	0	2	Bivalent
NM_130773	CNTNAP5	cg01308258;cg08790440;cg11344566;cg12919006;cg16198087;cg18582824	0	0	0	1	0	0	0	0	0	0	0	0	0	1	2	Bivalent
NM_024582	FAT4	cg03404279;cg03527919;cg04459504;cg05118638;cg08644023;cg10731073;cg15795630;cg22911422	0	0	1	0	0	0	0	0	0	0	0	1	0	0	2	Bivalent
NM_001205301	EGFLAM	cg00984146;cg05251676;cg05706117;cg16126816;cg16317273;cg20772101;cg23029193;cg24653263;cg26747293;cg26950557	0	0	1	0	0	0	0	0	0	0	0	1	0	0	2	Bivalent
NM_000833	GRIN2A	cg00287829;cg00518386;cg06758670;cg07642043;cg09239744;cg16368442;cg16904585;cg24764979;cg25047001	0	0	1	0	0	0	0	0	0	0	0	1	0	0	2	Bivalent
NM_198285	WDR86	cg10770742;cg12433277;cg17362861;cg21532325;cg24068372	0	0	1	0	0	0	0	0	0	0	0	1	0	0	2	Bivalent
NM_001080508	TBX18	cg01461410;cg02106850;cg04515996;cg07028914;cg09259037;cg09749813;cg09817427;cg14068328;cg16210497	0	0	1	0	0	0	0	0	0	0	0	1	0	0	2	Bivalent
NM_022439	MAL	cg04804539;cg06668300;cg07224914;cg09983051;cg21245652;cg22403344	0	0	1	0	0	0	0	0	0	0	0	1	0	0	2	Bivalent
NM_001934	DLX4	cg01832036;cg06681768;cg08092199;cg08971771;cg11472521;cg13604794;cg23634124	0	0	0	0	0	0	0	0	1	0	0	0	0	1	2	K27-only
NM_182573	LYPD5	cg02631462;cg08561856;cg11898486;cg12768605;cg14733720;cg14794281;cg14931230;cg15634398;cg17711567;cg25732462	0	0	0	1	0	0	0	0	0	0	0	0	0	1	2	K27-only
NM_001080461	UNCX	cg03092191;cg05157140;cg07765161;cg08507422;cg13242720;cg17294725;cg20870512;cg21158633;cg21543987	0	0	1	0	0	0	0	0	0	0	0	1	0	0	2	K27-only
NM_001037802	SKOR2	cg01859340;cg09319072	0	0	0	0	0	0	0	0	1	0	0	0	0	1	2	K27-only
NM_001168379	ZIC4	cg02387803;cg16790847;cg19516404;cg21639713;cg24620761	0	0	0	0	0	0	0	0	1	0	0	0	0	1	2	K27-only
NM_001029886	PFN3	cg00642460;cg01287088;cg06847624;cg14621323;cg20095656	0	0	0	0	0	1	0	0	0	0	0	0	0	1	2	K27-only
NM_018951	HOXA10	cg01397139;cg09411999;cg13703049;cg14625175;cg14649140;cg16857858;cg16967880;cg18243072;cg18416576;cg21172377	0	0	0	0	0	0	1	1	0	0	0	0	0	0	2	K27-only
NM_001007089	RESP18	cg14987769	0	0	0	0	0	0	0	0	0	0	0	1	0	1	2	K27-only
NM_006897	HOXC9	cg01615018;cg02568274;cg03122669;cg03215137;cg10694030;cg12699286;cg13233407;cg16356837;cg21272774;cg23828720;cg24500832;cg25456468	0	0	1	0	0	0	0	0	0	0	0	1	0	0	2	K27-only
NM_001098202	HIC1	cg01160692;cg17029019;cg20664636;cg23882658;cg25520679	0	0	1	0	0	0	0	0	0	0	0	0	0	1	2	K27-only
NM_001048	SST	cg00457403;cg02164046;cg07120369;cg13206017;cg15347189;cg16927040;cg25478614	0	1	0	1	0	0	0	0	0	0	0	0	0	0	2	K27-only
NM_001271043	NFIX	cg06744585;cg11758861;cg17976191;cg24277817	0	0	0	1	0	0	0	0	1	0	0	0	0	0	2	K27-only
NM_001145028	PALM3	cg01336912;cg18720973;cg18850089	1	0	0	0	0	0	0	0	0	0	0	0	0	1	2	K27-only
NR_038440	TBX5-AS1	cg03877376;cg10281002;cg14431443;cg16458436;cg17645823;cg21907579;cg23827572;cg26196480	0	0	0	0	0	0	0	0	1	0	0	0	0	1	2	K27-only
NM_032638	GATA2	cg02436004;cg06490988;cg13483882;cg16674492;cg19638477;cg22122410	0	0	1	0	0	0	0	0	0	0	0	1	0	0	2	K27-only
NM_002968	SALL1	cg00310215;cg01146232;cg01500945;cg05151154;cg05213609;cg06232807;cg06274671;cg06653699;cg06724588;cg07498275;cg07502439;cg08806408;cg09016242;cg22674717	0	0	1	0	0	0	0	0	0	0	0	1	0	0	2	K4-only
NM_003118	SPARC	cg08331313;cg08879559;cg14518209;cg22116670;cg23146663;cg25587069;cg25913233	0	0	0	0	0	0	0	0	0	0	1	0	0	1	2	K4-only
NM_033208	TIGD7	cg03004280;cg05540369;cg07306531;cg07949597;cg16480692	0	0	1	0	0	0	0	0	0	0	0	1	0	0	2	K4-only
NM_175075	TDRP	cg05142982;cg19019537	0	0	1	0	0	0	0	0	0	0	0	1	0	0	2	K4-only
NM_032534	KRBA1	cg03788131;cg08131100	0	0	1	0	0	0	0	0	0	0	0	1	0	0	2	K4-only
NM_001144985	CCDC169	cg04902286;cg05927742;cg07525003;cg11678027;cg13258563;cg13455704;cg15167956;cg19437258;cg19801062;cg20651988;cg23003720;cg23710498;cg26439710	0	0	1	0	0	0	0	0	0	0	0	1	0	0	2	K4-only
NM_005708	GPC6	cg00191477;cg07529657;cg12989574;cg16792800;cg19824907;cg25772299	0	0	1	0	0	0	0	0	0	0	0	1	0	0	2	K4-only
NM_182767	SLC6A15	cg02492791;cg03064067;cg08254307;cg14449051;cg14510812;cg17222500;cg18023283;cg19686001;cg19952303;cg21702506	0	0	1	0	0	0	0	0	0	0	0	1	0	0	2	K4-only
NR_036487	FGF14-AS2	cg06313119;cg11100836;cg16398329;cg24507144;cg25082959;cg26097011	0	0	1	0	0	0	0	0	0	0	0	1	0	0	2	K4-only
NM_031865	PCDHA13	cg00275741;cg01202150;cg11268983;cg22150440;cg25027798;cg25967418;cg26556719	1	0	0	0	0	0	0	0	0	0	0	0	0	1	2	K4-only
NM_014096	SLC43A3	cg07067982;cg07326438;cg19167683;cg23547429	0	0	1	0	0	0	0	0	0	0	0	1	0	0	2	K4-only
NM_006529	GLRA3	cg02521102;cg05424071;cg05990549;cg09841488;cg15104299;cg21094669;cg21365094;cg22045888;cg23697278;cg26226802;cg27517702	0	0	1	0	0	0	0	0	0	0	0	1	0	0	2	K4-only
NR_024390	LOC646999	cg05858889;cg06890747;cg12457909;cg21101743;cg25916044;cg27071152	0	0	0	0	0	0	0	1	1	0	0	0	0	0	2	K4-only
NR_026807	LINC00472	cg03318695;cg10039188;cg11574469;cg15045441;cg22300282;cg23281154;cg24772267;cg25141674;cg25210451;cg26162616	0	0	1	0	0	0	0	0	0	0	0	1	0	0	2	K4-only
NM_182572	ZSCAN1	cg02344833;cg05983315;cg10132208;cg19819285;cg20449685;cg21331821;cg24368848;cg25537993;cg27391267	0	0	0	1	0	0	0	0	1	0	0	0	0	0	2	K4-only
NM_003495	HIST1H4I	cg02599464;cg07636194;cg12349884;cg12920393;cg16991515;cg21269897	0	0	0	0	0	0	0	0	1	0	0	0	0	1	2	K4-only
NM_024870	PREX2	cg01568998;cg05293738;cg06617456;cg11549615;cg15690525;cg15745900;cg16009633;cg17147045;cg17459204;cg17747005;cg23300368;cg27467929	0	0	1	0	0	0	0	0	0	0	0	1	0	0	2	K4-only
NM_001164309	ZNF415	cg02721451;cg02886522;cg05769153;cg10332700;cg15202738;cg18301583;cg24892510;cg26087117	0	0	1	1	0	0	0	0	0	0	0	0	0	0	2	K4-only
NR_027049	ZNF788	cg01172903;cg06384763;cg09489445;cg11767984;cg20773651	0	0	1	0	0	0	0	0	0	0	0	1	0	0	2	K4-only
NM_153028	ZNF75A	cg03004280;cg05540369;cg07306531;cg07949597;cg16480692	0	0	1	0	0	0	0	0	0	0	0	1	0	0	2	K4-only
NM_032040	CCDC8	cg03576469;cg06747432;cg11715966;cg15984661;cg18653451	0	1	0	0	0	0	0	0	0	0	1	0	0	0	2	K4-only
NM_001040092	ENPP2	cg02156680;cg02534163;cg02709432;cg04452959;cg06998282	0	1	0	0	0	0	0	0	0	0	1	0	0	0	2	K4-only
NM_015683	ARRDC2	cg07721276;cg07844660;cg08021780;cg10791911;cg15044384;cg15528091	1	0	0	0	0	0	0	0	0	0	0	1	0	0	2	K4-only
NM_018086	FIGN	cg00490655;cg06564900;cg10903451;cg15259986;cg19156483;cg20959523	0	0	1	0	0	0	0	0	0	0	0	1	0	0	2	K4-only
NM_138812	DYDC1	cg00544337;cg01527459;cg11036831;cg11854806;cg12091732;cg13087076;cg16771783;cg18396533;cg25535587	0	0	1	0	0	0	0	0	0	0	0	1	0	0	2	K4-only
NR_033712	TP73-AS1	cg05491852;cg10634619;cg15472784;cg23666378	1	0	0	0	0	0	0	0	0	0	0	0	1	0	2	K4-only
NM_017556	FBLIM1	cg04897742;cg13484546;cg14531560;cg16519300;cg23002761;cg26036626	0	0	1	0	0	0	0	0	0	0	0	1	0	0	2	K4-only
NR_037802	ZNF625-ZNF20	cg00875960;cg02842629;cg02914087;cg06429617;cg17287725;cg17456704;cg17892556;cg24115221	0	0	1	0	0	0	0	0	0	0	0	1	0	0	2	K4-only
NM_001113523	PARP15	cg02346790;cg03840504;cg04564920;cg18016254;cg19166302;cg22821981;cg23442853	0	0	0	0	0	0	0	0	1	0	0	0	0	1	2	K4-only
NM_001099694	ZNF578	cg06672469;cg08681855;cg11909748;cg12665460;cg13461241;cg14582763;cg15449323;cg21553182;cg21657577;cg25763393	0	0	0	1	0	0	0	0	0	0	0	0	0	1	2	K4-only
NR_037801	ZNF625	cg00875960;cg02842629;cg02914087;cg06429617;cg17287725;cg17456704;cg17892556;cg24115221	0	0	1	0	0	0	0	0	0	0	0	1	0	0	2	K4-only
NM_145041	TMEM106A	cg03049782;cg04482110;cg08377924;cg15026277;cg18222083;cg19548479;cg21211480;cg21504064;cg24008544;cg24940138	1	0	0	0	0	0	0	0	0	0	1	0	0	0	2	K4-only
NM_001127321	CBX5	cg01856529;cg19641804;cg20687242;cg23824801;cg27408285	0	0	0	0	0	0	0	0	1	0	1	0	0	0	2	K4-only
NM_001127322	CBX5	cg01856529;cg19641804;cg20687242;cg23824801;cg27408285	0	0	0	0	0	0	0	0	1	0	1	0	0	0	2	K4-only
NR_036486	FGF14-IT1	cg06313119;cg11100836;cg16398329;cg24507144;cg25082959;cg26097011	0	0	1	0	0	0	0	0	0	0	0	1	0	0	2	K4-only
NM_001048205	REC8	cg03431846;cg07516252;cg16425038;cg16473141;cg18512948;cg18556834;cg18628371;cg19989295;cg24127861	0	0	0	0	0	1	0	0	0	0	1	0	0	0	2	K4-only
NR_026889	DKFZP434H168	cg00246932;cg00348762;cg01157070;cg02667667;cg03399271;cg06780839;cg07636145;cg07700514;cg07829842;cg19047292;cg27073113;cg27369423	0	0	1	0	0	0	0	0	0	0	0	1	0	0	2	K4-only
NM_002998	SDC2	cg08979737;cg13096260;cg14538332;cg16935295;cg18719750;cg23858558;cg24732574;cg25070637;cg25664438;cg26777303	0	0	1	0	0	0	0	0	0	0	0	1	0	0	2	K4-only
NR_102709	UCHL1-AS1	cg04178266;cg07068756;cg15032098;cg16026922;cg16142306;cg24715245	0	0	1	0	0	0	0	0	0	0	1	0	0	0	2	K4-only
NR_030632	MIR935	cg01666793;cg02694017;cg03593550;cg07785717;cg18055623;cg25235766;cg25253677	0	0	0	1	0	0	0	1	0	0	0	0	0	0	2	K4-only
NM_001270041	DYDC2	cg00544337;cg01527459;cg11036831;cg11854806;cg12091732;cg13087076;cg16771783;cg18396533;cg25535587	0	0	1	0	0	0	0	0	0	0	0	1	0	0	2	K4-only
NM_001101338	ZNF883	cg08476595	0	0	0	1	0	0	0	0	0	0	0	0	0	1	2	K4-only
NM_001100117	RIMS2	cg01482645;cg01566592;cg20800509	0	0	1	0	0	0	0	0	0	0	0	1	0	0	2	K4-only
NM_025027	ZNF606	cg09577391;cg12259537;cg25480379	0	0	0	1	0	0	0	0	0	0	0	0	0	1	2	K4-only
NM_002312	LIG4	cg07403350	0	0	0	0	1	0	0	0	0	0	1	0	0	0	2	K4-only
NM_144629	RFTN2	cg08373610;cg09096031;cg23334662	0	0	0	0	0	1	0	0	0	0	0	0	0	1	2	K4-only
NM_019036	HMGCLL1	cg03932978;cg05166820;cg06401021;cg06870213;cg11907729;cg13973820;cg15594967;cg21705897;cg22508969;cg26963356	0	0	1	0	0	0	0	0	0	0	1	0	0	0	2	K4-only
NM_001843	CNTN1	cg02622052;cg08990926;cg09143195;cg09732486;cg14436862;cg14625113;cg15087347;cg22560190;cg23500059	0	0	1	0	0	0	0	0	0	0	0	1	0	0	2	K4-only
NM_001010861	LPPR5	cg03120289;cg06124224;cg10159215;cg14991984;cg18623672;cg19365673;cg26266842	0	0	1	0	0	0	0	0	0	0	0	1	0	0	2	K4-only
NM_031461	CRISPLD1	cg01410472;cg01937650;cg02942845;cg04410024;cg14283968;cg15953602;cg21844856	0	0	1	0	0	0	0	0	0	0	0	1	0	0	2	K4-only
NM_152795	HIF3A	cg02879662;cg05286653;cg09789590;cg14088357;cg14117138;cg15229275;cg19310908	0	1	0	0	0	0	0	0	0	0	1	0	0	0	2	K4-only
NR_029668	MIR124-1	cg00528902;cg00571033;cg12877251;cg14278808;cg15248835;cg16424920;cg21535000	0	0	1	0	0	0	0	0	0	0	0	1	0	0	2	K4-only
NM_005769	CHST4	cg00840403;cg00887153;cg05535113;cg16562730	0	1	0	0	0	0	0	0	0	0	1	0	0	0	2	K4-only
NR_003920	LOC389705	cg13974505;cg14052511	0	0	0	0	0	0	0	0	0	0	0	1	0	1	2	K4-only
NM_001278201	SLC43A3	cg07067982;cg07326438;cg19167683;cg23547429	0	0	1	0	0	0	0	0	0	0	0	1	0	0	2	K4-only
NM_016815	GYPC	cg00014112;cg04453971;cg08129583;cg15768103;cg15975865;cg17105014;cg25390440	0	1	0	0	0	0	0	0	0	0	0	0	0	1	2	K4-only
NM_001178093	BCAT1	cg04543413;cg20399616;cg22814146;cg23792314;cg23930313	1	0	0	1	0	0	0	0	0	0	0	0	0	0	2	K4-only
NM_001163523	ITPRIPL1	cg06341177;cg06909469;cg08983217;cg11270393;cg13997864;cg17932631;cg18720905;cg24161793	0	1	0	0	0	0	0	0	0	0	1	0	0	0	2	K4-only
NM_001143960	C2orf74	cg01648237;cg05037927;cg10580144;cg16328106;cg18158151;cg23405039;cg24757310;cg26147678	0	0	0	0	0	0	0	0	0	0	0	0	1	1	2	K4-only
NR_040028	ZNF790-AS1	cg00578154;cg02408333;cg09259115;cg15113922;cg25546901	0	0	1	0	0	0	0	0	0	0	0	1	0	0	2	K4-only
NM_024833	ZNF671	cg03215105;cg11977686;cg12074025;cg19246110;cg21305471;cg24016939	0	0	1	0	0	0	0	0	0	0	0	1	0	0	2	K4-only
NM_180991	SLCO4C1	cg04621020;cg04633600;cg06480736;cg11267955;cg12864568;cg19774478;cg19788741;cg22149516;cg22439359;cg22991959	0	0	0	0	0	0	0	0	0	0	1	0	1	0	2	K4-only
NM_182609	ZNF677	cg03217253;cg04154138;cg06506966;cg16708981;cg21907914;cg24685755	0	0	0	1	0	0	0	0	0	0	0	1	0	0	2	K4-only
NM_001039670	IFFO1	cg00363813;cg00983904;cg01493517;cg01979888;cg08875705;cg17198308;cg22203219;cg23737737	0	0	0	0	0	0	0	0	0	1	0	0	0	1	2	K4-only
NM_181361	KCNMB2	cg08812936;cg10634551	0	1	0	0	0	1	0	0	0	0	0	0	0	0	2	K4-only
NR_036522	ZNF667-AS1	cg03289872;cg08063125	0	0	0	1	0	0	0	0	0	0	0	1	0	0	2	K4-only
NR_036496	LOC339803	cg01648237;cg05037927;cg10580144;cg16328106;cg18158151;cg23405039;cg24757310;cg26147678	0	0	0	0	0	0	0	0	0	0	0	0	1	1	2	K4-only
NM_015431	TRIM58	cg07533148;cg10983544;cg20146541;cg20429172;cg20810478;cg20855565;cg23054189;cg26157385	0	0	0	1	0	0	0	1	0	0	0	0	0	0	2	K4-only
NM_001244038	ZNF726	cg20649823	0	0	1	0	0	0	0	0	0	0	0	1	0	0	2	K4-only
NM_014800	ELMO1	cg00549566;cg04136149;cg06338562;cg07122245;cg08453021;cg11021995;cg11372090;cg15067340;cg15947096;cg16230141;cg17350006;cg17780595;cg17966167;cg19118812;cg25472353	0	0	1	0	0	0	0	0	0	0	0	0	1	0	2	K4-only
NM_006474	PDPN	cg02933679;cg05140069;cg05281894;cg09804380;cg10743104;cg11791751;cg15563963;cg16277479;cg18877506;cg21819468;cg22436123;cg25286482	0	0	1	0	0	0	0	0	0	0	0	1	0	0	2	K4-only
NR_028343	ZNF415	cg02721451;cg02886522;cg05769153;cg10332700;cg15202738;cg18301583;cg24892510;cg26087117	0	0	1	1	0	0	0	0	0	0	0	0	0	0	2	K4-only
NM_012098	ANGPTL2	cg08076018;cg13662634	0	1	0	0	0	0	0	0	0	0	1	0	0	0	2	K4-only
NM_002609	PDGFRB	cg12727795;cg16429070;cg25110734;cg25440811	0	1	0	0	0	0	0	0	0	0	1	0	0	0	2	K4-only
NM_015381	FAM19A5	cg04198308;cg06273376;cg22989103	0	0	1	0	0	0	0	0	0	0	0	1	0	0	2	K4-only
NM_001039111	TRIM71	cg14657525;cg17029062;cg19127283;cg19741945;cg21124497;cg21484228;cg23243038;cg23528400	0	0	1	0	0	0	0	0	0	0	0	1	0	0	2	K4-only
NM_001007531	NKAPL	cg00448814;cg00765128;cg01031101;cg02578944;cg09523275;cg10055566;cg10253847;cg17384889;cg18675097;cg18694169;cg21251018	0	1	0	0	0	0	0	0	0	0	0	0	0	1	2	K4-only
NM_001010879	ZIK1	cg00800512;cg01046104;cg02653557;cg04342092;cg06707978;cg12060744;cg18435449;cg18579862;cg26246807	0	0	0	1	0	0	0	0	0	0	0	0	0	1	2	K4-only
NM_018431	DOK5	cg00055557;cg00741836;cg20107395;cg23359394;cg27341128	0	0	1	0	0	0	0	0	0	0	0	1	0	0	2	K4-only
NM_004854	CHST10	cg02482700;cg03853987;cg16882226;cg19283506	0	0	1	0	0	0	0	0	0	0	0	1	0	0	2	K4-only
NM_001491	GCNT2	cg07264048;cg12242450;cg12695465;cg13347910	0	0	0	0	0	0	0	0	0	0	1	0	0	1	2	K4-only
NM_001166051	APBB2	cg02379560;cg04917391;cg05020685;cg05894734;cg06485940;cg12455762;cg16364495;cg23735712;cg26244738	0	0	0	0	0	0	0	0	0	0	0	1	1	0	2	K4-only
NM_001100877	PHYHD1	cg14299940	0	0	0	0	0	0	0	0	0	0	1	1	0	0	2	K4-only
NM_001008949	ITPRIPL1	cg06341177;cg06909469;cg08983217;cg11270393;cg13997864;cg17932631;cg18720905;cg24161793	0	1	0	0	0	0	0	0	0	0	1	0	0	0	2	K4-only
NM_004181	UCHL1	cg04178266;cg07068756;cg08319991;cg15032098;cg16026922;cg16142306;cg24715245	0	0	1	0	0	0	0	0	0	0	1	0	0	0	2	K4-only
NM_181723	MICU3	cg00720475;cg05956498;cg18577280;cg23218760	0	0	1	0	0	0	0	0	0	0	0	1	0	0	2	K4-only
NM_144601	CMTM3	cg00355909;cg01434608;cg03860859;cg06445928;cg08601917;cg08682544;cg09233013;cg16335762;cg23297477;cg26560414;cg26658728	0	0	1	0	0	0	0	0	0	0	0	1	0	0	2	K4-only
NM_024560	ACSS3	cg00354572;cg01283289;cg05143887;cg08314603;cg10789281;cg11659501;cg13273396;cg21754400;cg23614791;cg24711649;cg25358039;cg25971727;cg26272220	0	0	0	0	0	0	0	0	0	0	1	1	0	0	2	K4-only
NM_001135957	TRPC4	cg01764020;cg02057391;cg13549719;cg15071251;cg15696906;cg16409955;cg19275632;cg20535787;cg21432954	0	0	1	0	0	0	0	0	0	0	0	1	0	0	2	K4-only
NM_001256751	PEX5L	cg02009585;cg02119363;cg03175305;cg04894619;cg13473356;cg18780412;cg21176048;cg21564242;cg23346462;cg23756251	0	0	0	1	0	0	0	0	0	0	0	1	0	0	2	K4-only
NM_018968	SNTG2	cg06865612;cg09426834;cg20225749	0	0	1	0	0	0	0	0	0	0	0	1	0	0	2	K4-only
NR_040027	ZNF790-AS1	cg00578154;cg02408333;cg09259115;cg15113922;cg25546901	0	0	1	0	0	0	0	0	0	0	0	1	0	0	2	K4-only
NM_001856	COL16A1	cg05003322;cg16553500;cg23305408;cg26833120	0	1	0	0	0	0	0	0	0	0	1	0	0	0	2	K4-only
NM_032415	CARD11	cg00119896;cg13008538;cg14549249;cg16842053;cg18961281;cg26937500	0	1	0	0	0	0	0	0	0	0	0	0	0	1	2	K4-only
NM_001198910	CCDC169-SOHLH2	cg04902286;cg05927742;cg07525003;cg11678027;cg13258563;cg13455704;cg15167956;cg19437258;cg19801062;cg20651988;cg23003720;cg23710498;cg26439710	0	0	1	0	0	0	0	0	0	0	0	1	0	0	2	K4-only
NM_030955	ADAMTS12	cg04124352;cg18519308;cg26573704	0	1	0	0	0	0	0	0	0	0	1	0	0	0	2	K4-only
NM_001256172	ZNF85	cg05310990;cg11416076;cg15690721;cg19381810;cg21448033;cg22665276;cg23216292;cg25464210	0	0	1	0	0	0	0	0	0	0	0	1	0	0	2	K4-only
NM_001166054	APBB2	cg02379560;cg04917391;cg05020685;cg05894734;cg06485940;cg12455762;cg16364495;cg23735712;cg26244738	0	0	0	0	0	0	0	0	0	0	0	1	1	0	2	K4-only
NM_001166395	CHST4	cg00840403;cg16562730	0	1	0	0	0	0	0	0	0	0	1	0	0	0	2	K4-only
NR_046407	LINC00577	cg03738025;cg04744409;cg05513455;cg14246568;cg17885226;cg23746497	0	0	0	0	1	0	0	0	0	0	0	0	0	1	2	K4-only
NM_018659	CYTL1	cg00442112;cg01114088;cg03199564;cg04887807;cg05985589;cg06007271;cg08963972;cg13255282;cg17563034	0	1	0	0	0	0	0	1	0	0	0	0	0	0	2	K4-only
NM_001193451	TMTC1	cg08729318;cg12718339;cg13434308;cg15720995;cg20140110	0	0	1	0	0	0	0	0	0	0	0	1	0	0	2	K4-only
NM_001278563	COL26A1	cg02327123;cg13267931;cg14048874;cg14874750;cg17361163;cg18762727;cg23424003;cg25290307;cg27179533;cg27528510	0	0	1	0	0	0	0	0	0	0	0	1	0	0	2	K4-only
NR_037613	CMTM3	cg00355909;cg01434608;cg06445928;cg08601917;cg09233013;cg16335762;cg23297477;cg26560414;cg26658728	0	0	1	0	0	0	0	0	0	0	0	1	0	0	2	K4-only
NM_181786	HKR1	cg05280698;cg12024906;cg12948621;cg13687570;cg14166009;cg23448505;cg24834889;cg26734888	0	0	0	1	0	0	0	0	0	0	0	0	0	1	2	K4-only
NM_152358	IZUMO2	cg01857260;cg08188330;cg09697795;cg10374084;cg14742716;cg24296452	0	1	0	0	0	0	0	0	1	0	0	0	0	0	2	K4-only
NR_001448	ADAM5	cg07387286;cg11199639;cg14742937;cg19659741	0	1	0	0	0	0	0	0	0	0	1	0	0	0	2	Unmarked
NM_001145029	ANKRD30B	cg02105152;cg02992546;cg03014326;cg13266435;cg16584393;cg21293934;cg23703062;cg24061208;cg25824760	0	0	0	0	0	0	0	0	1	0	0	0	0	1	2	Unmarked
NM_007153	ZNF208	cg07657465;cg09418063;cg14794043;cg18500360;cg19830270;cg26938561;cg27291304	0	1	0	0	0	0	0	0	0	0	0	0	0	1	2	Unmarked
NM_022473	ZNF106	cg03402235;cg06794543;cg12492087	0	0	0	0	0	1	0	0	0	0	0	0	0	1	2	Unmarked
NR_001591	TPTEP1	cg12431879;cg26822097	0	0	0	1	0	0	0	0	0	0	0	0	0	1	2	Unmarked
NM_003950	F2RL3	cg05211836;cg08066035;cg08067617;cg10256336;cg14021375;cg14753355;cg19006008	0	1	0	0	0	0	0	0	0	0	0	0	0	1	2	Unmarked
NR_002818	RNF126P1	cg02486253;cg04069472	0	0	0	0	0	0	0	0	1	0	0	0	0	1	2	Unmarked
NM_001162498	LPAR6	#N/A	0	0	0	0	0	0	0	0	0	0	0	1	0	1	2	Unmarked
NM_000900	MGP	cg00431549;cg05360958	0	0	0	0	0	0	0	0	0	0	1	0	0	1	2	Unmarked
NR_037168	LOC100287846	cg02230854;cg04821793;cg13136220;cg16736896	0	0	1	0	0	0	0	0	0	0	0	1	0	0	2	Unmarked
NR_036475	LOC100289656	cg00473179;cg08179525	1	0	0	0	0	0	0	0	0	0	0	0	0	1	2	Unmarked
NR_003369	RRN3P2	cg03662014;cg05484548;cg06631160	1	0	0	0	0	0	0	0	1	0	0	0	0	0	2	Unmarked
NM_015264	KIAA0930	cg04223044;cg07795766;cg10820551;cg12251779;cg20061654;cg21935981;cg22488367	0	1	0	0	0	0	0	0	0	0	0	0	0	1	2	Unmarked
NM_080682	VCAM1	cg25762679	0	0	0	0	0	0	0	0	0	0	1	0	0	1	2	Unmarked
NM_001204798	KCNH2	cg02711872;cg14711997;cg15472092;cg18296036;cg18423852;cg20142972;cg20883831;cg24830730	0	0	0	0	0	1	0	0	0	0	1	0	0	0	2	Unmarked
NM_001198940	DTNA	cg15610027;cg18420599;cg22009464;cg26530706	0	1	0	0	0	0	0	0	0	0	1	0	0	0	2	Unmarked
NM_001098626	ZNF98	cg00806126;cg01436128;cg09768178;cg10601582;cg13371839	0	0	0	1	0	0	0	0	0	0	0	0	0	1	2	Unmarked
NR_026867	ZNF300P1	cg04755771;cg05016408;cg06953773;cg07499553;cg11501236;cg13790719;cg15996534;cg18428283;cg19585597;cg26212163;cg27079680	0	1	0	0	0	0	0	0	0	0	0	0	0	1	2	Unmarked
NM_020855	ZNF492	cg01485075;cg03230154;cg05241461;cg08271804;cg11785166;cg18365865;cg18599790;cg23217946;cg24889512	0	0	1	0	0	0	0	0	0	0	0	1	0	0	2	Unmarked
NM_152513	MEI1	cg10296410;cg10384919;cg10627301;cg11260046;cg20522370;cg22153239;cg22476848	0	0	0	0	0	0	0	0	1	0	0	0	0	1	2	Unmarked
NR_026663	GLIS3-AS1	cg14269813	0	0	0	0	0	0	0	0	1	0	0	0	1	0	2	Unmarked
NM_016529	ATP8A2	cg00044871;cg01782371;cg05460980;cg20665002;cg26708235	0	0	1	0	0	0	0	0	0	0	0	0	0	0	1	Bivalent
NM_153360	APCDD1L	cg07402669;cg10354244;cg13778709;cg14546153;cg14724471;cg20600210;cg23418591;cg23487201;cg24115032;cg25970377	0	0	0	0	0	0	0	0	0	0	0	0	0	1	1	Bivalent
NM_002738	PRKCB	cg00735962;cg03156893;cg03217795;cg03306374;cg04279973;cg08406370;cg24250393	0	0	0	0	0	0	0	0	0	0	0	0	1	0	1	Bivalent
NM_130843	PTPRN2	cg05119831;cg22282410;cg27392792	0	0	0	0	0	0	1	0	0	0	0	0	0	0	1	Bivalent
NM_006634	VAMP5	cg02652597;cg11108890;cg16719560;cg16865965;cg19513321	0	0	0	0	0	0	0	0	0	0	0	0	0	1	1	Bivalent
NM_002478	MYOD1	cg04499648;cg07271264;cg16519321;cg22653976;cg26410450	0	0	1	0	0	0	0	0	0	0	0	0	0	0	1	Bivalent
NR_027071	C8orf56	cg06399148;cg07222863;cg10918202;cg13094252;cg14025053;cg16314639;cg18168101;cg19790640;cg21131024;cg23816247	0	0	0	0	0	0	0	1	0	0	0	0	0	0	1	Bivalent
NM_002852	PTX3	cg11299991	0	0	0	0	0	0	0	0	0	0	1	0	0	0	1	Bivalent
NM_004361	CDH7	cg00589371;cg02370605;cg05637351;cg14120010;cg19119032	0	0	0	0	0	0	0	0	0	0	0	0	0	1	1	Bivalent
NM_020984	CHAT	cg05997350;cg06108782;cg12052765;cg18592174;cg27500798	0	0	0	0	0	0	0	0	0	0	0	1	0	0	1	Bivalent
NM_014244	ADAMTS2	cg01593190;cg05214690;cg13909534;cg18331515;cg26429655;cg26650846	0	0	1	0	0	0	0	0	0	0	0	0	0	0	1	Bivalent
NM_152913	TMEM130	cg01307939;cg02132470;cg05833635;cg06124528;cg19752627;cg19974428	0	0	1	0	0	0	0	0	0	0	0	0	0	0	1	Bivalent
NR_033389	LOC100132215	cg00445126;cg01156077;cg06528559;cg13433250;cg18126442;cg27344587	0	0	1	0	0	0	0	0	0	0	0	0	0	0	1	Bivalent
NM_002849	PTPRR	cg00793088;cg03928182;cg04464946;cg12690369;cg17514701;cg21678312;cg22376706;cg23694248	0	0	0	0	0	0	0	0	0	0	0	0	0	1	1	Bivalent
NM_001002912	C1orf173	cg03513964;cg03537032;cg15386773;cg19634242;cg19695945;cg22427475;cg27268184;cg27393126	0	0	1	0	0	0	0	0	0	0	0	0	0	0	1	Bivalent
NM_001040101	NSG1	cg17183546;cg17584804;cg20460797;cg22853607;cg23690904	0	0	1	0	0	0	0	0	0	0	0	0	0	0	1	Bivalent
NR_038897	LOC285084	cg02091526;cg02787917;cg02809707;cg05298922	0	0	0	0	0	0	0	0	0	0	1	0	0	0	1	Bivalent
NM_001099773	CYP11A1	cg00615746;cg02916102;cg09490603;cg14855334;cg16332610;cg17588266;cg24578679	0	0	0	0	0	0	0	0	0	0	1	0	0	0	1	Bivalent
NM_033646	CDH7	cg00333824;cg00589371;cg02370605;cg02835467;cg04564030;cg05637351	0	0	0	0	0	0	0	0	0	0	0	0	0	1	1	Bivalent
NR_026880	MGC12916	cg03832440;cg13443605;cg13855261;cg14016875;cg16619378	0	0	1	0	0	0	0	0	0	0	0	0	0	0	1	Bivalent
NM_001080471	PEAR1	cg02264567;cg06188545;cg11594940;cg20948486	0	0	0	0	0	0	0	0	1	0	0	0	0	0	1	Bivalent
NM_000784	CYP27A1	cg03460682;cg10147666;cg14553243;cg20601919	0	0	0	0	0	0	0	0	0	0	1	0	0	0	1	Bivalent
NM_021815	SLC5A7	cg03983336;cg05311412;cg06662812;cg07186154;cg11355135;cg14613271;cg16232126;cg17052964;cg18771173;cg20547653;cg26001902;cg26333822	0	0	0	0	0	0	0	0	0	0	0	0	0	1	1	Bivalent
NM_001077653	TBX20	cg02008154;cg06128028;cg08959216;cg10778441;cg17985646;cg18249173;cg23602974;cg24061141;cg26673012	0	0	0	1	0	0	0	0	0	0	0	0	0	0	1	Bivalent
NM_001271012	FLI1	cg10542562;cg11038774;cg11161828;cg17239923;cg25607177	0	0	1	0	0	0	0	0	0	0	0	0	0	0	1	Bivalent
NM_004093	EFNB2	cg03929741;cg06784108;cg11173146;cg27226949	0	0	0	0	0	0	1	0	0	0	0	0	0	0	1	Bivalent
NM_006896	HOXA7	cg05471296;cg05743885;cg07302069;cg08934785;cg09017619;cg10474350;cg15797110;cg19153763;cg20293594;cg22623133;cg23432345;cg26511321;cg27508551	0	0	0	0	0	0	0	0	0	0	1	0	0	0	1	Bivalent
NR_039745	MIR4520A	cg08103988;cg08750459;cg17459443;cg21358336	0	0	0	0	0	0	0	0	0	0	1	0	0	0	1	Bivalent
NM_001134222	IRX2	cg04992127;cg08204280;cg08235864	0	0	0	0	0	0	0	0	0	0	0	0	0	1	1	Bivalent
NM_080862	SPSB4	cg04353095;cg05258261;cg11384848;cg13874817;cg15562912;cg15867939;cg18403551;cg19019371;cg19443257;cg20979852;cg22036988;cg27515369	0	0	1	0	0	0	0	0	0	0	0	0	0	0	1	Bivalent
NM_003034	ST8SIA1	cg02472348;cg09354309;cg10333808;cg12253830;cg16970851;cg17079833;cg21521683;cg24723331	0	0	0	0	0	0	0	0	0	0	0	0	1	0	1	Bivalent
NM_005382	NEFM	cg02761376;cg07502389;cg07552803;cg09234518;cg16459364;cg18267374;cg23290344	0	0	0	0	0	0	0	0	0	0	0	0	0	1	1	Bivalent
NM_016540	GPR83	cg03345037;cg05374654;cg07586272;cg09891129;cg12226717;cg19851909;cg22325703;cg22638597;cg23739994;cg26738987;cg27634151	0	0	0	0	0	0	0	0	0	0	0	1	0	0	1	Bivalent
NM_001083909	GPR123	cg07068327;cg09639725;cg15613567;cg15825786;cg17315933;cg18029761;cg19396601;cg23380558;cg23633543	0	0	1	0	0	0	0	0	0	0	0	0	0	0	1	Bivalent
NM_012419	RGS17	cg01535733;cg16924337;cg17264670;cg19904233;cg24317255	0	0	0	0	0	0	1	0	0	0	0	0	0	0	1	Bivalent
NM_001144990	KIAA1239	cg06651311;cg11416384;cg11557636;cg25205699;cg26541867	0	0	0	1	0	0	0	0	0	0	0	0	0	0	1	Bivalent
NM_017628	TET2	cg06795971;cg08924430;cg09381178	0	0	0	0	0	0	0	0	0	0	1	0	0	0	1	Bivalent
NM_052863	SCGB3A1	cg01174140;cg01934626;cg06732395;cg09500443;cg10508993;cg11916729;cg19897330;cg21919857;cg22859061	0	0	0	0	0	0	0	0	0	0	1	0	0	0	1	Bivalent
NM_139056	ADAMTS16	cg00127167;cg03209854;cg22954449;cg22983903	0	0	0	0	0	0	0	0	0	0	0	0	0	1	1	Bivalent
NM_015692	CPAMD8	cg01049813;cg02697237;cg14923157;cg18465484	0	0	1	0	0	0	0	0	0	0	0	0	0	0	1	Bivalent
NM_009585	AGTR1	cg04807594;cg04878152;cg05710753;cg18304969;cg21457909;cg22082709;cg22498996	0	0	1	0	0	0	0	0	0	0	0	0	0	0	1	Bivalent
NM_000863	HTR1B	cg00181439;cg08614481;cg12103152;cg18019017;cg23424273;cg25763788	0	0	0	0	0	0	0	0	0	0	0	0	0	1	1	Bivalent
NR_046438	MEIS1-AS3	cg05180985;cg06651878;cg08225529;cg10633966;cg19572637;cg26482052	0	0	1	0	0	0	0	0	0	0	0	0	0	0	1	Bivalent
NM_182700	SP8	cg02496234;cg08831002;cg14141380;cg24881205	0	1	0	0	0	0	0	0	0	0	0	0	0	0	1	Bivalent
NM_175747	OLIG3	cg02550277;cg03093838;cg03889226;cg05262436;cg06918467;cg10632395	0	0	0	0	0	0	0	0	0	0	0	0	0	1	1	Bivalent
NM_181874	GRM7	cg02332525;cg04527363;cg17892178;cg20172500;cg24213507;cg27199820	0	0	0	0	0	0	0	0	0	0	0	0	0	1	1	Bivalent
NM_181519	SYT15	cg08301896;cg09373037;cg12499130;cg16459519;cg18513313	0	0	1	0	0	0	0	0	0	0	0	0	0	0	1	Bivalent
NR_003063	TUBA4B	cg01693157;cg08378442;cg08396863;cg08640923;cg11348442;cg16725050;cg19074496;cg23108728	0	0	0	0	0	0	0	0	0	0	1	0	0	0	1	Bivalent
NR_073589	SLC1A6	cg02489552;cg03928546;cg05923226;cg06522681;cg09470638;cg12695707;cg18721420;cg26842596	0	0	0	0	0	0	0	0	0	0	0	0	0	1	1	Bivalent
NM_173482	CCDC105	cg02489552;cg03928546;cg05923226;cg06522681;cg09470638;cg12695707;cg18721420;cg26842596	0	0	0	0	0	0	0	0	0	0	0	0	0	1	1	Bivalent
NM_001111045	CCNA1	cg02478448;cg05137358;cg10158541;cg12571423;cg13060997;cg17495912;cg18348647;cg18948722;cg26984343	0	0	0	0	0	0	0	0	0	0	0	0	1	0	1	Bivalent
NM_152864	NKAIN4	cg01911708;cg07675169;cg08111446;cg14877226	0	0	0	1	0	0	0	0	0	0	0	0	0	0	1	Bivalent
NM_001134407	GRIN2A	cg00287829;cg02585344;cg05406943;cg06193383;cg06758670;cg07642043;cg09239744;cg09461286;cg16904585;cg24764979	0	0	1	0	0	0	0	0	0	0	0	0	0	0	1	Bivalent
NM_001278473	CHRDL2	cg22994720;cg24392818	0	0	1	0	0	0	0	0	0	0	0	0	0	0	1	Bivalent
NM_177398	LMX1A	cg02054776;cg02361878;cg04351049;cg09069138;cg09248345;cg23971170	0	0	1	0	0	0	0	0	0	0	0	0	0	0	1	Bivalent
NM_001201528	PCSK2	cg00621913;cg01815529;cg06441668;cg19864758	0	0	1	0	0	0	0	0	0	0	0	0	0	0	1	Bivalent
NM_015617	PYGO1	cg06364757;cg09275667;cg11480800;cg12686317;cg17841803;cg19850348;cg23030278;cg25902187	0	0	1	0	0	0	0	0	0	0	0	0	0	0	1	Bivalent
NM_198504	PAQR9	cg04912999;cg14081924;cg15593298;cg15852572;cg26301689;cg27406373	0	0	1	0	0	0	0	0	0	0	0	0	0	0	1	Bivalent
NM_020469	ABO	cg07241568;cg13506600	0	0	0	0	0	0	0	0	0	0	0	0	0	1	1	Bivalent
NM_001146266	GPR85	cg00851377;cg01491795;cg03119639;cg06931815;cg08220649;cg10129816;cg10336790;cg13251269;cg20019019;cg20513548;cg21852992;cg24310431	0	0	1	0	0	0	0	0	0	0	0	0	0	0	1	Bivalent
NM_031311	CPVL	cg02032778;cg11044163;cg15375469;cg17052266;cg17163760;cg20101352;cg22187722;cg22825644;cg24448259	0	0	0	0	0	0	0	0	0	0	1	0	0	0	1	Bivalent
NM_001198552	WT1	cg01693350;cg09234616;cg12781568;cg13641903;cg15446391;cg19211915;cg22533573	0	0	0	0	0	0	0	0	0	0	0	0	0	1	1	Bivalent
NM_014926	SLITRK3	cg00466268;cg00665492;cg06020130;cg13619915;cg14717170;cg18447727;cg22126211;cg23626122;cg27363829	0	0	0	0	0	0	0	0	0	0	0	0	0	1	1	Bivalent
NM_016250	NDRG2	cg01574694;cg18081258;cg20902783;cg24112713;cg24734586	0	0	0	0	0	0	0	0	0	0	1	0	0	0	1	Bivalent
NM_021619	PRDM12	cg09191327;cg12539975;cg13928649	0	0	1	0	0	0	0	0	0	0	0	0	0	0	1	Bivalent
NM_178554	KY	cg00060320;cg00329270;cg12307306;cg12573071;cg15474615;cg18294023;cg19856252;cg21514540;cg22889573;cg23201032;cg24370755;cg24675998	0	0	1	0	0	0	0	0	0	0	0	0	0	0	1	Bivalent
NR_028386	LOC375196	cg07952813;cg11176990;cg12206199;cg17165695;cg22158769	0	0	0	0	0	0	1	0	0	0	0	0	0	0	1	Bivalent
NM_001276251	LDLRAD4	cg01022219;cg04967578;cg19389293;cg25140190	0	0	0	0	0	0	0	0	0	0	0	0	0	1	1	Bivalent
NM_001256413	HVCN1	cg06980169;cg22325530;cg25598159	0	0	0	0	0	0	0	0	0	0	1	0	0	0	1	Bivalent
NM_001276312	NOL3	cg01005439;cg04890459;cg06537680;cg09974990;cg13975336;cg26783727	0	0	0	0	0	0	0	0	0	0	1	0	0	0	1	Bivalent
NM_001166373	43891	cg00032805;cg02990869;cg07160277;cg10127275;cg10943359;cg21169914;cg21300373;cg22299454	0	0	0	0	0	0	0	0	0	0	0	0	0	1	1	Bivalent
NM_020351	COL8A1	cg05283542;cg18056266;cg19968403	0	0	1	0	0	0	0	0	0	0	0	0	0	0	1	Bivalent
NM_012190	ALDH1L1	cg01566526;cg02564134;cg02569236;cg06240450;cg07034362;cg07330230;cg07800320;cg08481491;cg11009245;cg11022432;cg16312163;cg16771578;cg20988073;cg21601837	0	0	0	0	0	0	0	0	0	0	1	0	0	0	1	Bivalent
NM_032110	DMRTA2	cg00152008;cg06921573;cg10776919;cg11448896;cg13210260;cg19030579;cg19380001;cg26560222;cg27265170	0	0	0	0	0	0	0	0	0	0	1	0	0	0	1	Bivalent
NM_006581	FUT9	cg01489686;cg01758512;cg07002201;cg25114913	0	0	0	1	0	0	0	0	0	0	0	0	0	0	1	Bivalent
NM_014564	LHX3	cg04298434;cg13658899	0	0	0	0	0	0	0	0	0	0	0	0	0	1	1	Bivalent
NM_004119	FLT3	cg05598562;cg07017374;cg09400887;cg14660839	0	0	0	0	0	0	0	0	0	0	0	0	1	0	1	Bivalent
NM_000093	COL5A1	cg03298938;cg13499271;cg13754661;cg14252519;cg26024843	0	0	1	0	0	0	0	0	0	0	0	0	0	0	1	Bivalent
NM_001256847	ABR	cg17298275;cg20699780	0	0	0	0	0	0	0	0	0	0	0	0	0	1	1	Bivalent
NM_005556	KRT7	cg07007400;cg07967679;cg08975803;cg09522147;cg09670128;cg14482313;cg14537533;cg22958090;cg25313172	0	0	0	0	0	0	0	0	1	0	0	0	0	0	1	Bivalent
NM_000809	GABRA4	cg18909973	0	0	0	0	0	0	0	0	0	0	0	0	0	1	1	Bivalent
NM_178013	PRIMA1	cg06133145;cg06918804;cg10002178;cg20895877;cg26099766	0	0	1	0	0	0	0	0	0	0	0	0	0	0	1	Bivalent
NM_024933	ANKRD53	cg05472974;cg05492660;cg18006568;cg23060872	0	0	0	0	0	0	0	0	0	0	1	0	0	0	1	Bivalent
NM_014839	LPPR4	cg00388673;cg03580297;cg03646889;cg05596294;cg06060191;cg11956761;cg15728779;cg18644191;cg18947801;cg26164310	0	0	1	0	0	0	0	0	0	0	0	0	0	0	1	Bivalent
NM_033255	EPSTI1	cg00338116;cg01536987;cg03478249;cg03753191;cg12138678;cg14539231;cg16327891;cg18882819;cg19915711;cg22125968;cg22905097;cg25261228;cg26714230	0	0	0	0	0	0	0	0	0	0	1	0	0	0	1	Bivalent
NM_001013735	FOXB2	cg06462796;cg12626956	0	0	0	0	0	0	0	0	1	0	0	0	0	0	1	Bivalent
NM_001172504	SLC6A2	cg03226000;cg04490714;cg04874129;cg09321400;cg09746736;cg09774787;cg16629702	0	0	0	0	0	0	0	0	0	0	0	1	0	0	1	Bivalent
NR_038264	ADAMTS9-AS2	cg04421973;cg07891473;cg21938436;cg22081832;cg25859972;cg26061177	0	0	0	0	0	0	0	0	0	0	1	0	0	0	1	Bivalent
NM_021951	DMRT1	cg01137471;cg03168582;cg13713293;cg13762060;cg14267263;cg25905812	0	0	1	0	0	0	0	0	0	0	0	0	0	0	1	Bivalent
NM_004267	CHST2	cg00995327;cg08858437;cg09638407;cg10886442;cg17815252	0	0	1	0	0	0	0	0	0	0	0	0	0	0	1	Bivalent
NM_053042	ZNF518B	cg04673825;cg09534159;cg10334767;cg11197905;cg12016437;cg13445199;cg13542964;cg16295725;cg21099470;cg23995914;cg25112312	0	0	0	0	0	0	0	0	0	0	0	0	1	0	1	Bivalent
NM_018058	CRTAC1	cg04105282;cg04861968;cg04991805;cg08969532;cg14233354	0	0	1	0	0	0	0	0	0	0	0	0	0	0	1	Bivalent
NR_034085	LOC648987	cg12319602;cg14919554	0	1	0	0	0	0	0	0	0	0	0	0	0	0	1	Bivalent
NM_001167959	TMEM178A	cg02886589;cg10708761;cg18968196;cg19935171;cg22373181	0	0	1	0	0	0	0	0	0	0	0	0	0	0	1	Bivalent
NM_001040007	RSPO4	cg00862894;cg01188592;cg05336115;cg17870408;cg19937938;cg22709307;cg23697417;cg26278454;cg26515460	0	0	1	0	0	0	0	0	0	0	0	0	0	0	1	Bivalent
NM_145657	GSX1	cg03388293;cg05344430;cg05967403;cg10071824;cg11354629;cg14168923;cg14973588;cg17369527;cg26270746;cg26609631	0	0	1	0	0	0	0	0	0	0	0	0	0	0	1	Bivalent
NM_144617	HSPB6	cg01915791;cg02372889;cg10790747;cg13558754;cg24673765	0	1	0	0	0	0	0	0	0	0	0	0	0	0	1	Bivalent
NR_027078	LOC283856	cg00866976;cg06728579;cg08613597;cg09103960;cg10273340	0	0	1	0	0	0	0	0	0	0	0	0	0	0	1	Bivalent
NM_001162371	LOC728392	cg01433610;cg06462347;cg08554115;cg18671949;cg22298430;cg27230784	0	0	0	1	0	0	0	0	0	0	0	0	0	0	1	Bivalent
NM_006983	MMP23B	cg03136646;cg26740494	0	0	1	0	0	0	0	0	0	0	0	0	0	0	1	Bivalent
NM_014344	FJX1	cg03483632;cg04573276;cg15536165;cg16430510;cg21294471;cg23083315;cg27351780	0	0	0	0	0	0	0	0	0	0	1	0	0	0	1	Bivalent
NM_001003675	LDLRAD4	cg00737978;cg14825976;cg14846965;cg15056105;cg22454011;cg24404630;cg25374649	0	0	0	0	0	0	0	0	0	0	1	0	0	0	1	Bivalent
NM_001007538	SHISA2	cg00099976;cg00109356;cg03099431;cg08386692;cg09668400;cg17830985;cg23142799	0	0	0	0	0	0	0	0	0	0	0	1	0	0	1	Bivalent
NM_173557	RNF152	cg01037637;cg03004714;cg06464594;cg07486895;cg07980518;cg14360865;cg17020562;cg19423014	0	0	0	0	0	0	0	0	0	0	1	0	0	0	1	Bivalent
NM_001278236	PTPN5	cg07217924;cg17250701	0	0	1	0	0	0	0	0	0	0	0	0	0	0	1	Bivalent
NM_015206	KIAA1024	cg00462168;cg00544449;cg00780845;cg05804863;cg11821817;cg15431821;cg19165854;cg22963554	0	0	1	0	0	0	0	0	0	0	0	0	0	0	1	Bivalent
NM_032526	NT5C1A	cg00990022;cg01656955;cg18862767;cg23045719	0	0	1	0	0	0	0	0	0	0	0	0	0	0	1	Bivalent
NM_022377	ICAM4	cg03740216;cg05890620;cg09258150;cg14993276;cg21494776	0	0	0	0	0	0	0	0	0	0	0	0	0	1	1	Bivalent
NM_003054	SLC18A2	cg00498305;cg00512279;cg08521987;cg13980799;cg15173134;cg15806304;cg19721867	0	0	1	0	0	0	0	0	0	0	0	0	0	0	1	Bivalent
NM_001278553	GRIN2C	cg05410012;cg05848509;cg13715127;cg19700341;cg21264131;cg23513814	0	0	1	0	0	0	0	0	0	0	0	0	0	0	1	Bivalent
NM_001134649	EIF4E3	cg03024619;cg10172415;cg13562542;cg20863339	0	0	1	0	0	0	0	0	0	0	0	0	0	0	1	Bivalent
NM_020866	KLHL1	cg03783663;cg14273027;cg20523861;cg23267558;cg24014143;cg24401870	0	1	0	0	0	0	0	0	0	0	0	0	0	0	1	Bivalent
NM_001135655	LY6H	cg03699469;cg23484951;cg24971209	0	0	1	0	0	0	0	0	0	0	0	0	0	0	1	Bivalent
NM_020950	KIAA1614	cg02156380;cg06692785;cg12604950;cg19708901	0	1	0	0	0	0	0	0	0	0	0	0	0	0	1	Bivalent
NM_152605	ZNF781	cg03611452;cg04784475;cg06940614;cg09449030;cg10701051;cg14587524;cg22521696;cg22685966;cg25324105;cg25875213	0	0	0	1	0	0	0	0	0	0	0	0	0	0	1	Bivalent
NM_001010852	CLVS2	cg01141812;cg01707818;cg05009934;cg08194879;cg08737743;cg10182317;cg15749870;cg18210226;cg18366209;cg21727532;cg24728018	0	0	0	0	0	0	0	0	0	0	0	0	0	1	1	Bivalent
NM_002316	LMX1B	cg14537362;cg18115406;cg18453621	0	0	1	0	0	0	0	0	0	0	0	0	0	0	1	Bivalent
NM_005251	FOXC2	cg02943578;cg04081201;cg08384637;cg24063470	0	0	1	0	0	0	0	0	0	0	0	0	0	0	1	Bivalent
NR_002139	HCG4	cg00030176;cg00501272;cg04214566;cg05216332;cg09112760;cg11232276;cg11278602;cg11901272;cg11973623;cg12154624;cg13300282;cg13497563;cg14443519;cg18299938;cg18457685;cg20387069;cg23849169	0	0	1	0	0	0	0	0	0	0	0	0	0	0	1	Bivalent
NM_001184699	CPXM1	cg04611203;cg06327407;cg06539804;cg07113642;cg11445123;cg12110677;cg15547669;cg21459340;cg22304612;cg23448584	0	0	0	0	0	0	0	0	0	0	0	0	1	0	1	Bivalent
NM_001496	GFRA3	cg02288341;cg03721195;cg09350274;cg15951557;cg18442524;cg19670286;cg19908207;cg21225170;cg23511432	0	0	0	0	0	0	0	0	0	0	1	0	0	0	1	Bivalent
NR_034013	WDR86-AS1	cg00234261;cg17881007;cg23476065	0	1	0	0	0	0	0	0	0	0	0	0	0	0	1	Bivalent
NM_145735	ARHGEF7	cg00557354;cg03925425	0	0	1	0	0	0	0	0	0	0	0	0	0	0	1	Bivalent
NM_000129	F13A1	cg01634141;cg03440267;cg04944873;cg14047667;cg20817661;cg24990131;cg27097018	0	0	0	0	0	0	0	0	0	0	0	0	0	1	1	Bivalent
NM_001332	CTNND2	cg00908526;cg04996219;cg05878337;cg07195011;cg13368756;cg14081218;cg16048517;cg25302419	0	0	1	0	0	0	0	0	0	0	0	0	0	0	1	Bivalent
NM_005048	PTH2R	cg01288372;cg06391199;cg06562306;cg06951245;cg21302622;cg23524735;cg24769821;cg25057743;cg25881038	0	0	1	0	0	0	0	0	0	0	0	0	0	0	1	Bivalent
NM_170682	P2RX2	cg00058329;cg20717123;cg22368664;cg26620450	0	0	1	0	0	0	0	0	0	0	0	0	0	0	1	Bivalent
NM_147127	EVC2	cg01834022;cg03278643;cg05542338;cg05571820;cg06426416;cg14654886;cg17242664;cg17255450;cg22290744;cg23665381;cg27434509	0	0	0	0	0	0	0	0	0	0	1	0	0	0	1	Bivalent
NM_001042519	C2orf88	cg02941781;cg06532037;cg08350814;cg11097717;cg14210694;cg15313226;cg19906093;cg22003435	0	0	0	0	0	0	0	0	0	0	1	0	0	0	1	Bivalent
NM_177972	TUB	cg01890845;cg02629281;cg09498146;cg10383019	0	0	1	0	0	0	0	0	0	0	0	0	0	0	1	Bivalent
NM_004893	H2AFY	cg01550148;cg01874869;cg07827630;cg14242292;cg15613420;cg15888087;cg16246489;cg18394340;cg24628744;cg26214742	0	0	0	0	0	0	0	0	0	0	0	0	0	1	1	Bivalent
NM_172375	KCNH5	cg11755405;cg13891978	0	0	0	0	0	0	0	1	0	0	0	0	0	0	1	Bivalent
NM_207334	FAM43B	cg03754311;cg04309384;cg05771261;cg09511914;cg15142222;cg19507093;cg20404387;cg26557658	0	0	1	0	0	0	0	0	0	0	0	0	0	0	1	Bivalent
NM_001204353	SPOCK3	cg00901765;cg05158197;cg09608712;cg09722742;cg13913012;cg20176349;cg21155380;cg22255664	0	0	1	0	0	0	0	0	0	0	0	0	0	0	1	Bivalent
NM_001164442	FAM159B	cg07500433;cg10981909	0	0	0	0	0	0	0	0	0	0	0	1	0	0	1	Bivalent
NR_024365	PP12613	cg03077077;cg10863741;cg13640145;cg16790291;cg18149485	0	0	0	1	0	0	0	0	0	0	0	0	0	0	1	Bivalent
NM_198427	BCAN	cg02599463;cg14423692;cg20270188;cg21475402	0	0	0	0	0	1	0	0	0	0	0	0	0	0	1	Bivalent
NM_012093	AK5	cg04867733;cg11595082;cg13392141;cg17014953;cg17445007;cg17484154;cg22949149;cg26466094;cg27175634	0	0	1	0	0	0	0	0	0	0	0	0	0	0	1	Bivalent
NM_032932	RAB11FIP4	cg12065524;cg12419135;cg13726682	0	0	1	0	0	0	0	0	0	0	0	0	0	0	1	Bivalent
NM_032784	RSPO3	cg01043019;cg06392318;cg07279933;cg09979256;cg19365062;cg25834568	0	0	1	0	0	0	0	0	0	0	0	0	0	0	1	Bivalent
NM_001190972	LOC100127983	cg00914041;cg01676962;cg17649385;cg23937816;cg26607758	0	0	1	0	0	0	0	0	0	0	0	0	0	0	1	Bivalent
NM_024944	CHODL	cg02920216;cg03886449;cg12743978;cg18349138;cg21350575	0	0	0	1	0	0	0	0	0	0	0	0	0	0	1	Bivalent
NM_000806	GABRA1	cg00048832;cg00051179;cg01086446;cg02065387;cg02322252;cg24523000;cg26597242	0	0	0	0	0	0	0	0	0	0	0	0	0	1	1	Bivalent
NM_006237	POU4F1	cg01994205;cg02279670;cg08097882;cg08278487;cg09010671;cg15604467;cg17957186;cg21264189;cg24425021;cg25682299;cg27398263	0	0	0	0	0	0	0	0	0	0	0	0	1	0	1	Bivalent
NM_018702	ADARB2	cg00467420;cg02270183;cg02899206;cg03410436;cg05307923;cg06730723;cg14590817;cg18727303;cg23684973;cg24184687	0	0	1	0	0	0	0	0	0	0	0	0	0	0	1	Bivalent
NR_073527	PPP2R2B	cg02760293;cg03659005;cg03693911;cg03851984;cg04583285;cg08774231;cg09528265;cg11826826;cg13971892;cg13983063;cg14693112;cg15927927;cg25021259;cg25149751;cg25363885	0	0	1	0	0	0	0	0	0	0	0	0	0	0	1	Bivalent
NM_001205293	CACNA1E	cg04902729;cg06987672;cg17987176;cg21378238;cg23241456;cg24106020	0	0	0	0	0	0	0	0	0	0	0	0	0	1	1	Bivalent
NM_020226	PRDM8	cg01304890;cg04343891;cg08074201;cg10695325;cg12572049;cg16117799;cg19595012;cg20142271;cg26162932	0	0	1	0	0	0	0	0	0	0	0	0	0	0	1	Bivalent
NM_016321	RHCG	cg01837657;cg02805106;cg07485916;cg10453365;cg10721782;cg11332236;cg12042113;cg18726691;cg24653181;cg27507295	0	0	0	0	0	0	0	0	0	0	1	0	0	0	1	Bivalent
NM_033143	FGF5	cg02002231;cg10031614;cg12528713;cg14197923;cg20528583	0	0	1	0	0	0	0	0	0	0	0	0	0	0	1	Bivalent
NM_003042	SLC6A1	cg07466705;cg07646731;cg08072251;cg11021744;cg13142700;cg19300741;cg23405575	0	0	1	0	0	0	0	0	0	0	0	0	0	0	1	Bivalent
NM_003836	DLK1	cg02874376;cg10528576;cg16800708;cg17412258;cg18373878;cg18864857;cg21575295	0	0	0	0	0	0	0	0	0	0	0	0	0	1	1	Bivalent
NM_006424	SLC34A2	cg01493016;cg03738352;cg07578695;cg19616230;cg19766441;cg21200703;cg27513574	0	0	0	0	0	0	0	0	0	0	1	0	0	0	1	Bivalent
NM_001253387	CHL1	cg00903242;cg01295518;cg04001014;cg07746943;cg08421685;cg11165881;cg12065366;cg25482786	0	0	1	0	0	0	0	0	0	0	0	0	0	0	1	Bivalent
NM_017655	GIPC2	cg00347563;cg01074657;cg04912843;cg09107315;cg09662920;cg09826056;cg19766489;cg24496666;cg25288420	0	0	0	0	0	0	0	0	1	0	0	0	0	0	1	Bivalent
NM_173800	AQPEP	cg03890037;cg06644553;cg07224726;cg10199250;cg15489294;cg16620526	0	0	0	1	0	0	0	0	0	0	0	0	0	0	1	Bivalent
NR_048571	GPM6A	cg19639622;cg20450979;cg22478591;cg22821324	0	0	1	0	0	0	0	0	0	0	0	0	0	0	1	Bivalent
NM_001278431	C1QTNF5	cg20483374;cg26090652	0	1	0	0	0	0	0	0	0	0	0	0	0	0	1	Bivalent
NM_001199635	ADCYAP1R1	cg17617930;cg27076139	0	0	1	0	0	0	0	0	0	0	0	0	0	0	1	Bivalent
NM_001252010	LUZP2	cg01924644;cg08068240;cg09717526;cg10345326;cg13083436;cg13376598;cg13922669;cg24473393;cg25469414;cg26242583	0	0	1	0	0	0	0	0	0	0	0	0	0	0	1	Bivalent
NM_003474	ADAM12	cg00922781;cg02327997;cg04892170;cg05181041;cg05237641;cg11668923;cg13488201;cg14621053;cg16257029;cg26808747	0	0	1	0	0	0	0	0	0	0	0	0	0	0	1	Bivalent
NM_000524	HTR1A	cg02266732;cg08259925;cg09698471;cg11615755;cg13666507;cg15092168;cg16280141	0	0	0	1	0	0	0	0	0	0	0	0	0	0	1	Bivalent
NM_021110	COL14A1	cg02964031;cg04242021;cg09404551;cg23158731;cg23196831	0	0	1	0	0	0	0	0	0	0	0	0	0	0	1	Bivalent
NM_001136002	TMEM229A	cg00531453;cg01426853;cg02640638;cg06692537;cg14107644;cg15731053;cg17025835;cg19760898	0	0	0	1	0	0	0	0	0	0	0	0	0	0	1	Bivalent
NM_033071	SYNE1	cg03415253;cg03882585;cg13929566;cg15773137;cg16434547;cg19342109;cg23931421;cg25977958	0	0	1	0	0	0	0	0	0	0	0	0	0	0	1	Bivalent
NM_001135774	SYN3	cg00099240;cg05206884;cg10170495;cg13140167;cg14062468;cg15479068;cg18500733;cg19681718;cg20464804;cg24060451;cg24556441	0	0	1	0	0	0	0	0	0	0	0	0	0	0	1	Bivalent
NM_001052	SSTR4	cg07676859;cg10019507;cg14631053;cg16502866;cg17586860;cg18197392;cg22534145	0	0	0	0	0	0	0	0	0	0	0	0	0	1	1	Bivalent
NM_001102659	LOC200726	cg08057136;cg12110911;cg12848065;cg17165841;cg20841047;cg21541833;cg25146557	0	0	0	0	0	0	0	0	0	0	0	0	0	1	1	Bivalent
NM_178569	C5orf38	cg04992127;cg08204280;cg08235864;cg11793269;cg13702053	0	0	0	0	0	0	0	0	0	0	0	0	0	1	1	Bivalent
NM_152890	COL24A1	cg09264282;cg12644264;cg13683218	0	0	1	0	0	0	0	0	0	0	0	0	0	0	1	Bivalent
NR_027069	LOC100132215	cg01156077;cg15402210;cg15732840;cg17583946;cg20585676;cg25518132	0	0	1	0	0	0	0	0	0	0	0	0	0	0	1	Bivalent
NM_021267	CERS1	cg00773902;cg03351460;cg05970528;cg18780259	0	0	1	0	0	0	0	0	0	0	0	0	0	0	1	Bivalent
NM_001206748	CAV2	cg12739419;cg14159963;cg16260298;cg25274503	0	0	0	0	0	0	0	0	0	0	1	0	0	0	1	Bivalent
NM_001199081	PODN	cg01394819;cg04765848;cg04875084;cg04918175;cg13764106;cg16028753;cg17104425;cg25629790	0	0	1	0	0	0	0	0	0	0	0	0	0	0	1	Bivalent
NM_172315	MEIS2	cg03951374;cg07433663;cg13800209;cg21643314	0	0	0	0	0	0	0	0	0	0	0	1	0	0	1	Bivalent
NM_006040	HS3ST4	cg02390209;cg24862668;cg26734696;cg26933063;cg27014135	0	0	1	0	0	0	0	0	0	0	0	0	0	0	1	Bivalent
NM_004588	SCN2B	cg10513118;cg13348944	0	0	0	0	0	0	0	0	0	0	0	0	0	1	1	Bivalent
NM_181844	BCL6B	cg06700146;cg10137837;cg11353035;cg15165676;cg22975671;cg24720583	0	0	0	0	0	0	0	0	0	0	0	0	0	1	1	Bivalent
NM_001161586	ME3	cg00474723;cg02493602;cg03953500;cg07560096;cg08387285;cg08477594;cg09645888;cg10160397;cg11953383;cg12030550;cg13391116;cg14881618;cg14883291;cg15698545;cg17080504;cg20334849	0	0	0	1	0	0	0	0	0	0	0	0	0	0	1	Bivalent
NM_001017440	CALN1	cg03263618;cg05223720	0	0	0	0	0	0	0	0	0	0	0	1	0	0	1	Bivalent
NM_001100	ACTA1	cg00064261;cg02767613;cg04030615;cg05347845;cg07777790;cg08652487;cg11689813;cg12908399;cg14852384;cg20025656;cg23597629;cg25792990;cg26163852	0	0	1	0	0	0	0	0	0	0	0	0	0	0	1	Bivalent
NM_182734	PLCB1	cg17510056;cg21844450;cg23657409;cg23797439;cg27591117	0	0	1	0	0	0	0	0	0	0	0	0	0	0	1	Bivalent
NM_033302	ADRA1A	cg07645844;cg17963840;cg20303399;cg21230493;cg22461835;cg23008606	0	0	0	0	0	0	0	0	0	0	0	0	0	1	1	Bivalent
NM_173050	SCUBE1	cg04965050;cg26219051;cg26684946	0	0	1	0	0	0	0	0	0	0	0	0	0	0	1	Bivalent
NM_002600	PDE4B	cg00046625;cg19754554;cg24637364;cg26832142	0	0	0	1	0	0	0	0	0	0	0	0	0	0	1	Bivalent
NM_138734	NRXN2	cg11892836;cg13015284	0	0	1	0	0	0	0	0	0	0	0	0	0	0	1	Bivalent
NR_023920	WT1-AS	cg01952234;cg07193766;cg13450005;cg13663793;cg14657517;cg19074340;cg19126300;cg19570244;cg22975913;cg26232818	0	0	1	0	0	0	0	0	0	0	0	0	0	0	1	Bivalent
NM_001029875	RGS7BP	cg03827337;cg05455931;cg08709073;cg12158471;cg14864853;cg17318297	0	0	1	0	0	0	0	0	0	0	0	0	0	0	1	Bivalent
NM_001010926	HES5	cg01116067;cg01985965;cg06839900;cg09827752;cg12053769;cg15923947;cg17755964;cg20430847	0	0	0	0	0	0	0	0	0	0	1	0	0	0	1	Bivalent
NM_001201	BMP3	cg01049530;cg01941671;cg05718036;cg20276585;cg20642710;cg22403273;cg26105156;cg26917673	0	0	0	0	0	0	0	0	0	0	0	0	1	0	1	Bivalent
NR_039874	MIR4520B	cg08103988;cg08750459;cg17459443;cg21358336	0	0	0	0	0	0	0	0	0	0	1	0	0	0	1	Bivalent
NM_001278098	GDNF	cg07423205;cg08204023;cg18182111;cg18725867;cg20683765;cg21590264;cg26473844	0	0	0	0	0	0	0	0	1	0	0	0	0	0	1	Bivalent
NM_015529	MOXD1	cg01019028;cg07570142;cg08661899;cg13603171;cg13640626;cg15594306;cg16478774;cg21294812	0	0	1	0	0	0	0	0	0	0	0	0	0	0	1	Bivalent
NM_080818	OXGR1	cg00158308;cg03371199;cg13990092;cg18956714;cg20381767;cg21356837;cg22996489;cg23037133;cg24663970	0	0	0	0	0	0	0	0	0	0	1	0	0	0	1	Bivalent
NM_001197221	PDE4D	cg03367519;cg05602356;cg17633020;cg18242030	0	0	0	0	0	0	0	0	0	0	1	0	0	0	1	Bivalent
NM_032880	IGSF21	cg03993263;cg08005774;cg21578219	0	0	1	0	0	0	0	0	0	0	0	0	0	0	1	Bivalent
NM_052862	RCSD1	cg02079933;cg07751287;cg12336540;cg14046986;cg18800085	0	0	1	0	0	0	0	0	0	0	0	0	0	0	1	Bivalent
NM_001142634	SPDYA	cg04786857;cg06816106;cg13546935;cg14044057	0	0	0	0	0	0	1	0	0	0	0	0	0	0	1	Bivalent
NR_001447	MT1L	cg00809164;cg10506097	0	0	0	0	0	0	0	0	1	0	0	0	0	0	1	Bivalent
NM_001037293	PALM2	cg00752376;cg02442436;cg02560967	0	0	1	0	0	0	0	0	0	0	0	0	0	0	1	Bivalent
NR_073526	PPP2R2B	cg02760293;cg03659005;cg03693911;cg03851984;cg04583285;cg08774231;cg09528265;cg11826826;cg13971892;cg13983063;cg14693112;cg15927927;cg21938261;cg25021259;cg25149751;cg25363885	0	0	1	0	0	0	0	0	0	0	0	0	0	0	1	Bivalent
NM_207517	ADAMTSL3	cg04138185;cg09371439;cg11611600;cg14096889;cg14230666	0	0	1	0	0	0	0	0	0	0	0	0	0	0	1	Bivalent
NM_005398	PPP1R3C	cg00197495;cg00830735;cg06051961;cg09775312;cg12486537;cg18644675;cg19902394;cg20475550;cg21017752;cg23909584;cg26448681;cg26667395	0	0	1	0	0	0	0	0	0	0	0	0	0	0	1	Bivalent
NM_020465	NDRG4	cg00687686;cg01466678;cg04190807;cg04942472;cg11306587;cg13031432	0	0	1	0	0	0	0	0	0	0	0	0	0	0	1	Bivalent
NM_001099439	EPHA10	cg00667938;cg06163371;cg07447922;cg12128017;cg18537001;cg20510207;cg21306240	0	0	0	0	0	0	0	0	0	0	0	0	0	1	1	Bivalent
NM_004386	NCAN	cg08249988;cg13724788;cg14316898;cg17767542;cg21204606;cg22090773;cg22681934	0	0	1	0	0	0	0	0	0	0	0	0	0	0	1	Bivalent
NM_139354	MATK	cg07752026;cg11326255;cg13535593;cg17429382;cg17845532;cg22818306	0	0	1	0	0	0	0	0	0	0	0	0	0	0	1	Bivalent
NM_206919	ARL9	cg00244517;cg02786012;cg04528060;cg04638014;cg06922635;cg15846316	0	0	0	0	0	0	0	0	0	0	1	0	0	0	1	Bivalent
NM_001267616	ARPP21	cg02202141;cg05039475;cg06387459;cg10796805;cg19819145;cg22698904;cg24632247	0	0	1	0	0	0	0	0	0	0	0	0	0	0	1	Bivalent
NM_020660	GJD2	cg00792849;cg08095196;cg10386483;cg11525643;cg14576896;cg16729415;cg21053529	0	0	0	0	0	0	0	0	0	0	0	0	0	1	1	Bivalent
NR_003551	DPY19L2P4	cg03098837;cg03571927;cg05884394;cg06237774;cg10754670;cg11699845;cg12456681;cg14576062;cg22370005;cg23998645;cg24617568	0	0	1	0	0	0	0	0	0	0	0	0	0	0	1	Bivalent
NM_001164595	PDZRN4	cg14750066;cg16896079;cg21926708;cg26116950	0	0	0	0	0	0	0	0	0	0	0	1	0	0	1	Bivalent
NM_002235	KCNA6	cg03240509;cg13188098;cg26162582	0	0	0	0	0	0	0	0	0	0	0	0	0	1	1	Bivalent
NM_019854	PRMT8	cg01693063;cg06029846;cg07912789;cg11596580;cg19656577;cg23739862;cg24100636;cg27316886	0	0	1	0	0	0	0	0	0	0	0	0	0	0	1	Bivalent
NM_020697	KCNS2	cg01592801;cg08231709;cg08706670;cg11964564;cg14688104	0	0	0	0	0	0	1	0	0	0	0	0	0	0	1	Bivalent
NM_001159	AOX1	cg01217071;cg02144933;cg02657832;cg04380340;cg08266417;cg08952506;cg09729613;cg12627583;cg13000082;cg13875120;cg24569637;cg27547291	0	0	0	0	0	0	0	0	0	0	1	0	0	0	1	Bivalent
NM_001111047	CCNA1	cg00282249;cg02478448;cg05089090;cg05137358;cg08676975;cg10158541;cg11513637;cg12417071;cg17495912;cg18348647;cg18948722;cg26984343	0	0	0	0	0	0	0	0	0	0	0	0	1	0	1	Bivalent
NR_047673	LRRC4C	cg09147985;cg19849428;cg22645719	0	0	0	1	0	0	0	0	0	0	0	0	0	0	1	Bivalent
NM_002237	KCNG1	cg14282904;cg24924779;cg26748449	0	0	1	0	0	0	0	0	0	0	0	0	0	0	1	Bivalent
NM_001085398	TLX1NB	cg02096397;cg02567119;cg03020810;cg05329692;cg08908184;cg09586183;cg18964775;cg25741023;cg27272677	0	0	1	0	0	0	0	0	0	0	0	0	0	0	1	Bivalent
NM_133447	AGAP11	cg06744119;cg10376827;cg11700824;cg12191938;cg25323057	0	0	0	0	0	0	0	0	0	0	1	0	0	0	1	Bivalent
NM_006680	ME3	cg00474723;cg02493602;cg03953500;cg07560096;cg08387285;cg08477594;cg09645888;cg10160397;cg11953383;cg12030550;cg13391116;cg14881618;cg14883291;cg15698545;cg17080504;cg20334849	0	0	0	1	0	0	0	0	0	0	0	0	0	0	1	Bivalent
NM_001199505	PHACTR3	cg01278387;cg02765859;cg12869912	0	0	1	0	0	0	0	0	0	0	0	0	0	0	1	Bivalent
NM_001271457	C11orf93	cg07354861;cg10045354;cg10894441;cg15081566;cg20465794;cg21645554;cg23882862;cg25316749;cg26459819	0	0	0	0	0	0	0	0	0	0	1	0	0	0	1	Bivalent
NM_052910	SLITRK1	cg01729717;cg07104706;cg13988851;cg14246335;cg19696317;cg20312205;cg25938646;cg26998274	0	0	0	0	0	0	0	0	0	0	0	0	0	1	1	Bivalent
NR_015374	LOC401463	cg00023185;cg08188993;cg12874181;cg14588078;cg20702056;cg22585595;cg23778149;cg24668736;cg26965597	0	0	0	0	0	0	0	0	0	0	0	0	0	1	1	Bivalent
NM_002509	NKX2-2	cg06178563;cg06624291;cg07070391;cg11651285;cg16524928;cg17029168;cg21409881;cg22265644;cg23114866	0	0	1	0	0	0	0	0	0	0	0	0	0	0	1	Bivalent
NM_000885	ITGA4	cg05246303;cg10526659;cg10965575;cg17265419;cg20415809;cg25515269;cg25652029	0	0	0	0	0	0	0	0	0	0	0	0	1	0	1	Bivalent
NM_001270873	GABRG3	cg00745725;cg02069715;cg02281208;cg03024760;cg05678749;cg08182446;cg08445263;cg11651237;cg12919520;cg21711132;cg27553667	0	0	0	1	0	0	0	0	0	0	0	0	0	0	1	Bivalent
NM_182894	VSX2	cg07573727;cg09816693;cg09954698;cg11176135;cg11525285;cg12827555;cg15416329;cg21057587;cg23118730	0	0	0	0	0	0	0	0	0	0	0	0	0	1	1	Bivalent
NM_001037341	PDE4B	cg04110665;cg04704294;cg08716655;cg16294013;cg19754554;cg22336004;cg22488256;cg26832142	0	0	1	0	0	0	0	0	0	0	0	0	0	0	1	Bivalent
NM_147147	BVES	cg10979880;cg13725782;cg14159026;cg14314653;cg20624391;cg25280433	0	0	1	0	0	0	0	0	0	0	0	0	0	0	1	Bivalent
NR_038346	MAGI2-AS3	cg03009871;cg05662404;cg05902852;cg11109374;cg14592474;cg15210108;cg18018828;cg26542254	0	0	1	0	0	0	0	0	0	0	0	0	0	0	1	Bivalent
NM_003380	VIM	cg00146951;cg01154046;cg02236650;cg05151811;cg06460869;cg08918274;cg15363487;cg19111999;cg20198108;cg23912429;cg26306372	0	0	0	0	0	0	0	0	0	0	1	0	0	0	1	Bivalent
NM_032144	RAB6C	cg06288154;cg09676860	0	0	0	0	0	0	0	0	0	0	0	1	0	0	1	Bivalent
NM_032321	C2orf88	cg02941781;cg06532037;cg08350814;cg11097717;cg14210694;cg15313226;cg19906093;cg22003435	0	0	0	0	0	0	0	0	0	0	1	0	0	0	1	Bivalent
NM_001135649	FOXI3	cg02884176;cg08871855;cg13535212;cg19544662;cg23044079;cg23511613;cg23539933;cg24746100	0	0	0	0	0	0	0	0	0	0	0	0	1	0	1	Bivalent
NM_138717	PPT2	cg00110832;cg00552704;cg00933538;cg01111041;cg02956248;cg03570994;cg04105091;cg05133205;cg06025456;cg06108383;cg06264679;cg10551329;cg11386011;cg11941520;cg12585943;cg12626589;cg12738718;cg12883279;cg13102294;cg13934406;cg14130039;cg16481280;cg17113856;cg17229678;cg17329164;cg18049167;cg20328456;cg23359665;cg23470939;cg25426302;cg27134827	0	0	0	0	0	0	0	0	0	0	1	0	0	0	1	Bivalent
NM_001220473	PPFIA2	cg01578987;cg04250847;cg06085994;cg14080075;cg20419307	0	0	1	0	0	0	0	0	0	0	0	0	0	0	1	Bivalent
NM_199131	VAX1	cg00263760;cg13457172;cg16043357;cg18646207;cg25662463;cg26339504	0	0	1	0	0	0	0	0	0	0	0	0	0	0	1	Bivalent
NR_038963	ELOVL2-AS1	cg13562911;cg23642061	0	0	1	0	0	0	0	0	0	0	0	0	0	0	1	Bivalent
NM_001142633	PIK3R5	cg01653005;cg04916523;cg08269742;cg09359907;cg12863545;cg16918989;cg18470295;cg18923721;cg26239391;cg26998044	0	0	1	0	0	0	0	0	0	0	0	0	0	0	1	Bivalent
NM_001276249	LDLRAD4	cg00737978;cg14825976;cg14846965;cg15056105;cg22454011;cg24404630;cg25374649	0	0	0	0	0	0	0	0	0	0	1	0	0	0	1	Bivalent
NM_001220475	PPFIA2	cg01578987;cg04250847;cg06085994;cg14080075;cg20419307	0	0	1	0	0	0	0	0	0	0	0	0	0	0	1	Bivalent
NM_000870	HTR4	cg00840960;cg07102705;cg12816057;cg12825070	0	0	0	1	0	0	0	0	0	0	0	0	0	0	1	Bivalent
NM_130386	COLEC12	cg05892960;cg07137336;cg19461621;cg20747000	0	0	1	0	0	0	0	0	0	0	0	0	0	0	1	Bivalent
NM_205848	SYT6	cg01974027;cg08105352;cg25201881	0	0	1	0	0	0	0	0	0	0	0	0	0	0	1	Bivalent
NM_032413	C15orf48	cg06123942;cg06751446;cg08278554;cg11287660;cg18384926;cg21839138;cg25137030	0	0	0	0	0	0	0	0	0	0	0	0	0	1	1	Bivalent
NM_001191056	PDE1C	cg02914422;cg04011182;cg05512100;cg09198448;cg14604568;cg15988350	0	0	1	0	0	0	0	0	0	0	0	0	0	0	1	Bivalent
NM_012301	MAGI2	cg04671932;cg05902852;cg14592474;cg15210108	0	0	1	0	0	0	0	0	0	0	0	0	0	0	1	Bivalent
NM_004304	ALK	cg06905692;cg12740757;cg13552710;cg14163665;cg18022777;cg18277754;cg20311261;cg25999722	0	0	1	0	0	0	0	0	0	0	0	0	0	0	1	Bivalent
NM_001003938	HBM	cg01558909;cg01744019;cg04141813;cg06319822;cg08393070;cg09812623;cg21664030;cg26540367;cg26976732	0	0	1	0	0	0	0	0	0	0	0	0	0	0	1	Bivalent
NM_001002911	GPR139	cg01944044;cg08280383;cg20086208	0	0	1	0	0	0	0	0	0	0	0	0	0	0	1	Bivalent
NM_002776	KLK10	cg03118626;cg03762081;cg17766007;cg18437710	0	0	0	0	0	0	0	0	0	0	1	0	0	0	1	Bivalent
NM_001385	DPYS	cg05736768;cg06954346;cg09435415;cg09929374;cg10303487;cg10654165;cg14015441;cg16783744;cg17087640;cg20774846	0	0	0	0	0	0	0	0	0	0	0	0	0	1	1	Bivalent
NM_001256114	LHX8	cg05352087;cg07404921;cg10095577;cg13691003;cg19411474;cg23166389;cg26309264	0	0	1	0	0	0	0	0	0	0	0	0	0	0	1	Bivalent
NM_003857	GALR2	cg07274618;cg10247252;cg16533138;cg16898239;cg27494087	0	0	1	0	0	0	0	0	0	0	0	0	0	0	1	Bivalent
NM_024426	WT1	cg01952234;cg07193766;cg13450005;cg13663793;cg14657517;cg15107670;cg19074340;cg19126300;cg19570244;cg26232818	0	0	1	0	0	0	0	0	0	0	0	0	0	0	1	Bivalent
NM_001271507	CCDC177	cg05218346;cg09280770;cg20547455	0	0	1	0	0	0	0	0	0	0	0	0	0	0	1	Bivalent
NM_145888	KLK10	cg03118626;cg04772683;cg11170179;cg15910208;cg17766007;cg18437710;cg21869055;cg24512400	0	0	0	0	0	0	0	0	0	0	1	0	0	0	1	Bivalent
NM_001029854	PDE8B	cg02329935;cg08311610;cg13554086;cg18089852;cg25373100	0	0	1	0	0	0	0	0	0	0	0	0	0	0	1	Bivalent
NM_001134855	TRIM17	cg01907584;cg04945350;cg11253514;cg18875460;cg20939768;cg24848599	0	0	1	0	0	0	0	0	0	0	0	0	0	0	1	Bivalent
NM_032109	OTP	cg05578840;cg13378628;cg15852891;cg16691593;cg21097283;cg21269843;cg24231716	0	0	1	0	0	0	0	0	0	0	0	0	0	0	1	Bivalent
NM_001094	ASIC2	cg02254574;cg02423064;cg07142461;cg09152943;cg11101926;cg12810096;cg13298963;cg14603098;cg19747232;cg19942495;cg23976464;cg24613080;cg25033990	0	0	0	0	0	0	0	0	0	0	0	0	0	1	1	Bivalent
NM_006174	NPY5R	cg01002253;cg04961466;cg08346159;cg10341154;cg11784623;cg13975625;cg20618622;cg21748223	0	0	0	0	0	0	0	0	0	0	0	0	0	1	1	Bivalent
NM_001039349	EFEMP1	cg03817671;cg05168033;cg08130988;cg16118212;cg25968367	0	0	1	0	0	0	0	0	0	0	0	0	0	0	1	Bivalent
NM_153703	PODN	cg01394819;cg04765848;cg04875084;cg04918175;cg13764106;cg16028753;cg25629790	0	0	1	0	0	0	0	0	0	0	0	0	0	0	1	Bivalent
NM_001135690	PENK	cg06066137;cg10397440;cg11060276;cg19149681;cg24645221	0	0	0	0	0	0	0	0	0	0	0	0	0	1	1	Bivalent
NM_002409	MGAT3	cg18399321;cg20806180	0	0	0	0	0	0	0	0	0	0	0	1	0	0	1	Bivalent
NM_175052	ST8SIA4	cg01922936;cg03975797;cg04380513;cg12665504;cg13320626;cg16673106;cg18428516;cg19088984;cg26337020	0	0	1	0	0	0	0	0	0	0	0	0	0	0	1	Bivalent
NM_004887	CXCL14	cg07516956;cg07557560;cg10179196;cg18995088;cg25011337;cg27090201	0	0	0	0	0	0	0	0	0	0	1	0	0	0	1	Bivalent
NM_175611	GRIK1	cg07950000;cg08685096;cg09199698;cg09542111;cg21816539;cg23475371;cg24868359	0	0	1	0	0	0	0	0	0	0	0	0	0	0	1	Bivalent
NM_013231	FLRT2	cg01537995;cg01711160;cg02305242;cg04975505;cg05855039;cg12080751;cg16800165;cg17410236;cg18845692;cg23400512;cg25120290;cg26651233	0	0	0	0	0	0	0	0	0	0	0	1	0	0	1	Bivalent
NM_020949	SLC7A14	cg03658578;cg04386206;cg05937737;cg15536845;cg18278638;cg18774195;cg21884231	0	0	0	0	0	0	0	0	0	0	0	0	0	1	1	Bivalent
NM_138735	NRXN1	cg03295083;cg04707706;cg05015185;cg07529754;cg10099415;cg13906811;cg17526573;cg17677030;cg18201351	0	0	0	0	0	0	0	0	0	0	0	0	0	1	1	Bivalent
NM_001270364	ALDH1L1	cg02564134;cg02569236;cg06240450;cg07034362;cg07330230;cg07800320;cg08481491;cg11022432;cg16771578;cg20988073;cg21601837	0	0	0	0	0	0	0	0	0	0	1	0	0	0	1	Bivalent
NM_001098475	TDRD10	cg02457680;cg02856953;cg05637536;cg16683920;cg16899920;cg18081940;cg19970699;cg25460143	0	0	1	0	0	0	0	0	0	0	0	0	0	0	1	Bivalent
NR_045597	PDE10A	cg00777627;cg04326854;cg10675138;cg24133115	0	0	0	0	0	0	0	0	0	0	0	1	0	0	1	Bivalent
NR_073202	DSCAM	cg07962392;cg09880551;cg10644072;cg12135856;cg12201779;cg12409525;cg15372721;cg21173447	0	0	0	0	0	0	0	0	0	0	0	0	0	1	1	Bivalent
NM_005215	DCC	cg00027400;cg02835371;cg07897248;cg07935012;cg14222939;cg14743291;cg16964748;cg18801691;cg19042459;cg19613722;cg21381065;cg21669679	0	0	1	0	0	0	0	0	0	0	0	0	0	0	1	Bivalent
NM_001137550	LRRFIP1	cg02367660;cg15674193;cg17815538;cg20993114;cg26271045	0	0	1	0	0	0	0	0	0	0	0	0	0	0	1	Bivalent
NM_001204266	GABRA4	cg03593419;cg09812070;cg16976370;cg22345214;cg22798201;cg24154839;cg24394172;cg25951981	0	0	0	0	0	0	0	0	0	0	0	0	0	1	1	Bivalent
NM_000361	THBD	cg08244522;cg09083579;cg09279949;cg11769163;cg22152407;cg24562819;cg25397597	0	0	1	0	0	0	0	0	0	0	0	0	0	0	1	Bivalent
NM_014621	HOXD4	cg04843067;cg12539415;cg18750960;cg19509393;cg21011616	0	0	0	0	0	0	0	0	1	0	0	0	0	0	1	K27-only
NM_001243256	ZIC4	cg02820514;cg03355998;cg05548555;cg06369327;cg21127068	0	0	0	1	0	0	0	0	0	0	0	0	0	0	1	K27-only
NM_001277205	P2RY6	cg06637774;cg22881680;cg25137204;cg26343510	0	1	0	0	0	0	0	0	0	0	0	0	0	0	1	K27-only
NR_029609	MIR10B	cg00014998;cg00767581;cg01152019;cg07011913;cg08717880;cg12127282;cg12215739;cg14399060;cg17104824;cg19519747;cg25942990;cg27160395	0	0	0	0	0	0	0	0	1	0	0	0	0	0	1	K27-only
NM_006898	HOXD3	cg00005847;cg01128482;cg09387749;cg10304824;cg12634591;cg23981871	0	0	0	0	0	0	0	0	1	0	0	0	0	0	1	K27-only
NR_029582	MIR196A1	cg02329038;cg10432569	0	0	0	0	0	0	0	0	0	0	0	0	1	0	1	K27-only
NM_001277224	TAGLN2	cg03651478;cg13892570;cg22698489	0	0	0	0	0	0	0	0	0	0	1	0	0	0	1	K27-only
NM_001257096	PAX1	cg01783070;cg03140968;cg04811512;cg04881131;cg07684169;cg08448701;cg16767801;cg17620199;cg19054524;cg19079845;cg20552282;cg22058250;cg22837767;cg22906273	0	0	1	0	0	0	0	0	0	0	0	0	0	0	1	K27-only
NR_033855	LINC00485	cg02469871;cg03810428;cg11784990;cg15877129	0	0	0	1	0	0	0	0	0	0	0	0	0	0	1	K27-only
NM_001077500	KLK10	cg03118626;cg03762081	0	0	0	0	0	0	0	0	0	0	1	0	0	0	1	K27-only
NM_003189	TAL1	cg00875272;cg06087421;cg06955484;cg19797376	0	0	0	0	0	0	0	1	0	0	0	0	0	0	1	K27-only
NR_039752	MIR4526	cg14825976;cg14846965;cg15056105;cg22454011;cg25374649	0	0	0	0	0	0	0	0	0	0	1	0	0	0	1	K27-only
NM_024014	HOXA6	cg03529432;cg04265576;cg05928186;cg06237983;cg09936824;cg12110087;cg12810523;cg14044640;cg17994139;cg22469274;cg23129930	0	0	0	1	0	0	0	0	0	0	0	0	0	0	1	K27-only
NM_003269	NR2E1	cg02062480;cg03383382;cg07411432;cg08616702;cg12463600;cg18093751;cg18918349;cg24104938;cg24225517	0	0	1	0	0	0	0	0	0	0	0	0	0	0	1	K27-only
NM_001038705	GPR149	cg18097189	0	0	0	0	0	0	0	0	0	0	1	0	0	0	1	K27-only
NR_001558	LINC00261	cg06226567;cg06398556;cg07991288;cg10215507;cg13884903;cg19575804	0	0	0	1	0	0	0	0	0	0	0	0	0	0	1	K27-only
NM_001927	DES	cg03583111;cg13227481;cg15015639;cg18182399;cg23490796;cg24927800	0	1	0	0	0	0	0	0	0	0	0	0	0	0	1	K27-only
NR_015411	LINC00925	cg00481644;cg03766449;cg12598235;cg20738500;cg21029612;cg21751684;cg27407147	0	0	0	0	0	0	0	0	1	0	0	0	0	0	1	K27-only
NM_001001933	LHX8	cg01185626;cg01259156;cg01971160;cg09222749;cg20594809;cg26688527	0	0	0	0	0	0	0	0	0	0	0	0	0	1	1	K27-only
NR_015448	DLX6-AS1	cg00337916;cg25430192;cg25707676;cg26075150	0	0	0	0	0	0	0	0	1	0	0	0	0	0	1	K27-only
NM_022049	GPR88	cg06223162;cg09408571	0	0	0	0	0	0	0	0	0	0	1	0	0	0	1	K27-only
NM_020708	SLC12A5	cg07547549;cg07871947;cg10439765;cg11155865;cg11301556;cg22752533;cg26639039	0	0	0	0	0	0	0	0	0	0	0	0	0	1	1	K27-only
NM_002975	CLEC11A	cg08678044;cg13152535;cg16651537;cg24790297;cg25309343	0	0	0	0	0	0	0	0	0	0	0	0	0	1	1	K27-only
NR_002795	HOXA11-AS	cg05311410;cg05977669;cg08479590;cg09495769;cg09661370;cg10767141;cg12810084;cg12997720;cg13352750;cg15431544;cg15760840;cg15916646;cg17950095;cg18977999;cg21447117;cg24446586;cg24709033;cg24932686;cg25901381;cg26857670	0	0	0	0	0	0	0	0	1	0	0	0	0	0	1	K27-only
NM_001198966	NFATC4	cg12177793;cg26009486	0	0	0	0	0	0	0	0	0	0	1	0	0	0	1	K4-only
NR_003587	MYO15B	cg00204465;cg03744440;cg04738888;cg06390536;cg08781140;cg12184886;cg16097357;cg22287064;cg25032094	1	0	0	0	0	0	0	0	0	0	0	0	0	0	1	K4-only
NM_003302	TRIP6	cg03568858;cg07627485;cg12507655;cg16555537;cg21406967;cg24075113	0	0	0	0	0	0	0	0	0	0	1	0	0	0	1	K4-only
NM_024733	ZNF665	cg01620580;cg07686635;cg11265561;cg12360029;cg17169289;cg25526475	0	0	0	1	0	0	0	0	0	0	0	0	0	0	1	K4-only
NM_001170633	C12orf56	cg01031441;cg04162059;cg13446772;cg13867865;cg14643892;cg15731056;cg19998368;cg20116199;cg24990968	0	0	1	0	0	0	0	0	0	0	0	0	0	0	1	K4-only
NM_058176	HDAC9	cg11765288;cg12081743;cg21433125;cg25620356	0	0	0	0	0	0	0	0	0	0	1	0	0	0	1	K4-only
NM_001004313	TMEM220	cg01275588;cg11750736	0	0	0	0	0	0	0	0	0	0	0	1	0	0	1	K4-only
NM_001144915	FGFR2	cg01385327;cg02210151;cg11430259;cg17710779;cg18566515	0	0	0	0	0	0	0	0	0	0	1	0	0	0	1	K4-only
NR_024281	LINC00599	cg00528902;cg00571033;cg12877251;cg14278808;cg15248835;cg15526246;cg16424920;cg21535000	0	0	0	0	0	0	0	0	0	0	0	1	0	0	1	K4-only
NM_001142534	SH2D3C	cg13737221;cg13828227;cg23313665	0	0	0	0	1	0	0	0	0	0	0	0	0	0	1	K4-only
NM_001164097	VCAN	cg00567749;cg02371408;cg02551029;cg04525496;cg05176349;cg17771652;cg19540689;cg21810188	0	0	1	0	0	0	0	0	0	0	0	0	0	0	1	K4-only
NM_145038	DRC1	cg01734112;cg02583525;cg04726446;cg10883621;cg11525280;cg13255216;cg14013195;cg14273450	0	0	0	0	0	0	0	0	0	0	1	0	0	0	1	K4-only
NM_021912	GABRB3	cg01690182;cg01775260;cg08063317;cg11273478;cg15940569	0	0	0	0	0	0	0	0	0	0	0	1	0	0	1	K4-only
NM_001330	CTF1	cg04169260;cg06159340;cg17800442;cg27239280	0	0	0	0	0	0	0	0	0	0	1	0	0	0	1	K4-only
NM_198859	PRICKLE2	cg02147797;cg07480640;cg22083047;cg23047271;cg25818214	0	0	0	0	0	0	0	0	0	0	0	0	0	1	1	K4-only
NR_033998	LOC729970	cg16127594;cg18344652;cg26227186;cg27231335	0	0	0	0	0	0	0	0	0	0	1	0	0	0	1	K4-only
NM_001145205	SHISA9	cg02482218;cg02860732;cg03057083;cg04106647;cg04342955;cg09229683;cg26752526	0	0	1	0	0	0	0	0	0	0	0	0	0	0	1	K4-only
NM_001243243	ZSCAN31	cg05605299;cg06903569;cg07369507;cg08343881;cg09996797;cg13997124;cg15743358;cg17968647;cg19013262;cg21138752;cg23084951	0	0	0	1	0	0	0	0	0	0	0	0	0	0	1	K4-only
NM_001128220	VGLL4	cg03370106;cg07330114;cg18096987;cg18809126	0	0	0	0	0	0	0	0	0	0	1	0	0	0	1	K4-only
NM_001040272	ADAMTSL1	cg00116234;cg16714091	0	0	0	0	0	0	0	0	0	0	0	1	0	0	1	K4-only
NM_000961	PTGIS	cg05932408;cg10772290;cg11746287;cg15543919;cg16537756	0	0	1	0	0	0	0	0	0	0	0	0	0	0	1	K4-only
NM_000062	SERPING1	cg00369658;cg02520020;cg09061733;cg10030791;cg15617545;cg15918732	0	0	0	0	0	0	0	0	0	0	0	0	0	1	1	K4-only
NM_198540	B3GNT8	cg00498024;cg16849024;cg20557104	0	0	0	0	0	0	0	0	0	0	1	0	0	0	1	K4-only
NM_002006	FGF2	cg03941587;cg11327857;cg15128226;cg17214107;cg21550024;cg24683623	0	0	0	0	0	0	0	0	0	0	0	0	0	1	1	K4-only
NM_004842	AKAP7	cg05915981;cg12700074	0	0	0	1	0	0	0	0	0	0	0	0	0	0	1	K4-only
NM_000349	STAR	cg00464095;cg09630404;cg18406492	0	0	0	0	0	0	0	0	1	0	0	0	0	0	1	K4-only
NM_015569	DNM3	cg02011074;cg04399751;cg04986015;cg05377226;cg06211893;cg23391785;cg26261793	0	1	0	0	0	0	0	0	0	0	0	0	0	0	1	K4-only
NM_003524	HIST1H2BH	cg05457344;cg13194994;cg14776962;cg15080119	0	0	0	0	0	0	1	0	0	0	0	0	0	0	1	K4-only
NM_001256738	GDAP1L1	cg03157591;cg04448487;cg07003360;cg09994356;cg12689285;cg12989128;cg13868604;cg17810944;cg25799864	0	0	0	0	0	0	0	0	0	0	1	0	0	0	1	K4-only
NM_015596	KLK13	cg03307401;cg20104456;cg22918012;cg26524263	0	0	0	0	0	0	0	0	0	0	1	0	0	0	1	K4-only
NM_001010897	SERP2	cg01226614;cg05873889;cg06807397;cg12379940;cg16021126;cg22667178;cg24079361	0	0	0	0	0	0	0	0	0	0	0	1	0	0	1	K4-only
NM_172349	NSD1	cg04885832;cg08369368;cg18016826;cg23383189	0	0	0	0	0	0	0	0	0	0	1	0	0	0	1	K4-only
NM_001190709	COL11A1	cg00172849;cg00325149;cg03520644;cg12884406;cg20847625;cg24495344;cg26256793;cg26436330	0	1	0	0	0	0	0	0	0	0	0	0	0	0	1	K4-only
NM_133266	SHANK2	cg03395558;cg03578926;cg04396791;cg10362475;cg14537332;cg17627654;cg19942459;cg21202716;cg25638611	0	0	0	0	0	0	0	0	0	0	0	0	0	1	1	K4-only
NR_040013	LOC644554	cg00578032;cg01436998;cg25819441;cg27353143	0	0	0	1	0	0	0	0	0	0	0	0	0	0	1	K4-only
NM_000965	RARB	cg02499249;cg03428864;cg03481274;cg06720425;cg10712623;cg12479047;cg16927871;cg18094781;cg19003815;cg20899354;cg24396624;cg26124016;cg26786980	0	0	0	0	0	0	0	0	0	0	1	0	0	0	1	K4-only
NM_031934	RAB34	cg02530437;cg03452174;cg08032476;cg08839210;cg18686527;cg19982230;cg21237418;cg21816330;cg22803868	0	0	0	0	0	0	0	0	0	0	1	0	0	0	1	K4-only
NM_001144757	SCG5	cg08478116;cg11397301;cg12134633;cg13492803;cg15744134;cg15787039;cg18358621	0	0	0	0	0	0	0	0	0	0	0	0	0	1	1	K4-only
NM_000561	GSTM1	cg06632762;cg10950028	0	0	0	0	0	0	0	0	0	0	0	0	0	1	1	K4-only
NM_021195	CLDN6	cg02199397;cg02732252;cg06036912;cg07384961;cg08934846;cg08935125;cg17865114	0	1	0	0	0	0	0	0	0	0	0	0	0	0	1	K4-only
NM_024603	BEND5	cg02290238;cg03038003;cg03603214;cg06744574;cg07790169;cg11666087;cg15940724;cg16573178	0	0	1	0	0	0	0	0	0	0	0	0	0	0	1	K4-only
NM_033135	PDGFD	cg02120582;cg03145963;cg07748540;cg08596000;cg12027636;cg18403606;cg26756506	0	0	1	0	0	0	0	0	0	0	0	0	0	0	1	K4-only
NM_004841	RASAL2	cg14515791;cg22109530;cg22730327	0	0	0	0	1	0	0	0	0	0	0	0	0	0	1	K4-only
NM_031484	MARVELD1	cg00844376;cg06616710;cg06679087;cg23733123;cg24576735;cg25355803;cg27165884	0	0	0	0	0	0	0	0	0	0	1	0	0	0	1	K4-only
NM_001171979	ZNF829	cg02370417;cg02459604;cg03060201;cg03584288;cg15322783;cg15746891;cg21292152;cg21761844;cg24052101;cg26612849	0	0	1	0	0	0	0	0	0	0	0	0	0	0	1	K4-only
NM_015677	SH3YL1	cg00108164;cg03468349;cg10181419;cg13354988;cg20749741;cg21825027;cg25945732	0	0	0	0	0	0	1	0	0	0	0	0	0	0	1	K4-only
NM_001261439	ETV4	cg22562494	0	0	0	0	0	0	0	0	0	0	1	0	0	0	1	K4-only
NM_014759	PHYHIP	cg05947740;cg07315894;cg13093774;cg18237323;cg23352722	0	0	0	0	0	0	0	0	1	0	0	0	0	0	1	K4-only
NM_001079823	LAMA2	cg01850783;cg01916115;cg20237610;cg20640433;cg20711828;cg26926076	0	0	0	0	0	0	0	0	0	0	1	0	0	0	1	K4-only
NM_002848	PTPRO	cg06357925;cg09736112;cg10646402;cg19402885;cg22207537;cg22374861;cg25816184;cg27196745	0	0	1	0	0	0	0	0	0	0	0	0	0	0	1	K4-only
NR_003127	ZNF542	cg01510051;cg03146949;cg06942685;cg08697092;cg10638415;cg15708153;cg17524924;cg18787401;cg21493505;cg26309134;cg27062795;cg27477373	0	0	0	1	0	0	0	0	0	0	0	0	0	0	1	K4-only
NM_018555	ZNF331	cg00533364;cg05264510;cg06397398;cg09918296;cg15205507;cg16969623;cg17352157;cg21748418;cg25538376;cg26705425	0	0	1	0	0	0	0	0	0	0	0	0	0	0	1	K4-only
NM_177925	H2AFJ	cg01312194;cg03111818;cg07112131;cg08855729;cg09163005;cg15310637;cg15873303;cg19774315;cg19981263;cg24638668;cg27086773	0	0	0	0	0	0	0	0	0	0	0	0	0	1	1	K4-only
NM_001131055	HRH2	cg02527199;cg09575258;cg11131902;cg17483297	0	0	1	0	0	0	0	0	0	0	0	0	0	0	1	K4-only
NM_001174097	LDHB	cg00501628;cg00753478;cg02659794;cg03243946;cg04354474;cg05578357;cg06437004;cg07869763;cg08148261;cg09118312;cg10483825;cg13665266;cg14209005;cg19878987;cg20717612;cg26800162	0	0	0	0	0	0	1	0	0	0	0	0	0	0	1	K4-only
NM_147189	FAM110B	cg02505871;cg04400337;cg06480231;cg15423872;cg17151990;cg19502867;cg26294667	0	0	1	0	0	0	0	0	0	0	0	0	0	0	1	K4-only
NM_001256865	DNAJC6	cg04567445;cg04993276;cg08856601;cg09082287;cg09235539;cg26304237	0	0	0	0	0	0	0	1	0	0	0	0	0	0	1	K4-only
NM_001204404	ANK3	cg27434149	0	1	0	0	0	0	0	0	0	0	0	0	0	0	1	K4-only
NR_024057	ZNF542	cg01510051;cg03146949;cg06942685;cg08697092;cg10638415;cg15708153;cg17524924;cg18787401;cg21493505;cg26309134;cg27062795;cg27477373	0	0	0	1	0	0	0	0	0	0	0	0	0	0	1	K4-only
NM_014840	NUAK1	cg02518216;cg05687834;cg08059755;cg12433395;cg17393917;cg18525352;cg20060685;cg23555120;cg26877596	0	0	0	0	0	0	0	0	0	0	1	0	0	0	1	K4-only
NR_026876	STL	cg00991794;cg02312409;cg06993703;cg07439975;cg10621825;cg16203203;cg17382198;cg18192252;cg19171596;cg19478500;cg23521835	0	0	0	0	0	0	0	0	0	0	0	1	0	0	1	K4-only
NM_031852	PCDHA7	cg07745166;cg12962191;cg14622069;cg17508591;cg26618441	0	0	0	0	0	0	0	0	0	0	0	0	0	1	1	K4-only
NM_052852	ZNF486	cg02427230;cg03570035;cg07227744;cg08471835;cg15748470;cg16879806;cg24749688;cg25393574	0	0	0	0	0	0	0	0	0	0	0	0	0	1	1	K4-only
NM_152510	HORMAD2	cg01141459;cg04046669;cg13245431;cg14509403;cg15209808;cg16686158;cg17632937;cg21843594;cg21890667;cg23268208	0	0	0	0	0	0	0	0	1	0	0	0	0	0	1	K4-only
NM_178232	HAPLN3	cg01367393;cg01647632;cg02071670;cg02231729;cg03628719;cg03698393;cg08348496	0	0	0	0	0	0	0	0	0	0	1	0	0	0	1	K4-only
NM_152349	KRT222	cg01289103;cg10050661;cg11641791;cg12029804;cg15056128;cg18435674;cg23776012	0	0	0	0	0	0	0	0	0	0	1	0	0	0	1	K4-only
NM_003523	HIST1H2BE	cg07997936;cg11822208;cg12169977;cg12392684;cg22036966;cg22942804;cg25329267;cg26191923;cg26256916;cg27415552	0	0	0	0	0	0	0	0	0	0	0	0	0	1	1	K4-only
NM_014594	ZNF354C	cg04488521;cg07470489;cg07515940;cg08278489;cg08522107;cg10802132;cg10864596;cg11538128;cg12623648;cg16091952;cg19025430;cg19761115;cg25942031	0	0	1	0	0	0	0	0	0	0	0	0	0	0	1	K4-only
NM_138794	LYPLAL1	cg02665570;cg03221247;cg05062446;cg05460949;cg15558129;cg16681597;cg26757053	0	0	0	0	0	0	0	0	0	0	0	0	0	1	1	K4-only
NM_182521	ZSWIM2	cg05907046;cg07548607;cg10396546;cg13135031;cg14145801;cg14393114;cg14762973;cg16516691;cg18950539;cg19535896;cg24617723;cg26033349	0	0	1	0	0	0	0	0	0	0	0	0	0	0	1	K4-only
NM_001166346	MDFIC	cg01550799;cg02239805;cg05338976;cg10436410;cg16886175;cg23468130	0	0	1	0	0	0	0	0	0	0	0	0	0	0	1	K4-only
NM_005944	CD200	cg01031032;cg03329165;cg04367486;cg07251099;cg09006015;cg10777851	0	0	0	0	0	0	0	0	0	0	1	0	0	0	1	K4-only
NM_001243729	C3orf55	cg00301159;cg03066577;cg03358769;cg04385236;cg04682135;cg06827247;cg17912370;cg22987447	0	0	0	0	0	0	0	0	0	0	0	0	0	1	1	K4-only
NM_000964	RARA	cg00236832;cg03053374;cg08332908;cg09858022;cg22935450;cg26654286	0	0	0	0	0	0	0	0	0	0	1	0	0	0	1	K4-only
NR_033851	MGC39372	cg17298973	0	0	0	0	0	0	0	0	0	0	1	0	0	0	1	K4-only
NM_005941	MMP16	cg02889488;cg05033271;cg08397978;cg11536457;cg12818557;cg26756083	0	0	1	0	0	0	0	0	0	0	0	0	0	0	1	K4-only
NM_001024596	ZNF772	cg01017773;cg02298956;cg03526224;cg03553544;cg21489303;cg23235772;cg23391173;cg24911359;cg25419914;cg26929012	0	0	1	0	0	0	0	0	0	0	0	0	0	0	1	K4-only
NR_036455	ZNF826P	cg20140425	0	0	0	0	0	0	0	0	0	0	0	0	0	1	1	K4-only
NM_052954	CYYR1	cg19678828;cg21039874;cg21282630	0	0	0	0	0	0	0	0	0	0	0	0	0	1	1	K4-only
NM_001256739	GDAP1L1	cg03157591;cg04448487;cg07003360;cg09994356;cg12689285;cg12989128;cg13868604;cg17810944;cg25799864	0	0	0	0	0	0	0	0	0	0	1	0	0	0	1	K4-only
NM_005534	IFNGR2	cg10572943;cg14850771;cg22212414;cg22669060;cg24865779	0	0	0	0	0	0	0	0	0	0	1	0	0	0	1	K4-only
NM_001037232	ZNF829	cg02370417;cg02459604;cg03060201;cg03443751;cg03584288;cg15322783;cg15746891;cg20154403;cg21292152;cg21761844;cg24052101;cg26612849	0	0	1	0	0	0	0	0	0	0	0	0	0	0	1	K4-only
NM_001013659	ZNF793	cg02711801;cg04818919;cg07482795;cg13181745;cg14732998;cg15139588;cg17332326;cg18154014;cg23296010;cg24078985;cg24588375;cg25361907	0	0	1	0	0	0	0	0	0	0	0	0	0	0	1	K4-only
NR_038334	LOC100505715	cg03241649;cg13933427;cg14602471;cg25786696	0	0	0	0	0	0	0	0	0	0	0	0	0	1	1	K4-only
NM_054025	B3GAT1	cg03940620;cg05446629;cg11038843;cg23596233	0	0	1	0	0	0	0	0	0	0	0	0	0	0	1	K4-only
NM_000101	CYBA	cg00054525;cg03787864;cg03870138;cg04879832;cg05744675;cg08177833;cg08843517;cg09025501;cg10246531;cg19790294;cg24046411;cg26537639;cg27176614	0	0	0	0	0	0	0	0	0	0	1	0	0	0	1	K4-only
NM_032090	PCDHGA10	cg01169021;cg01311360;cg10917547;cg21580428;cg22847228;cg25353450;cg26826004;cg27599792	0	0	0	0	0	0	0	0	0	0	0	0	0	1	1	K4-only
NM_001205329	JAM3	cg02174225;cg03637878;cg14962363;cg19055936;cg24140030;cg24625128;cg24899571	0	0	1	0	0	0	0	0	0	0	0	0	0	0	1	K4-only
NM_017433	MYO3A	cg00155879;cg08441170;cg15081351;cg23735482;cg23771603	0	0	0	0	0	0	0	0	0	0	0	0	0	1	1	K4-only
NM_006587	CORIN	cg01228355;cg02553486;cg10391212;cg19736608;cg26018901	0	0	0	0	0	0	0	0	0	0	1	0	0	0	1	K4-only
NM_001080484	KIAA1751	cg00014118;cg05700129;cg08114317;cg22344830;cg23621729;cg26067203	0	0	0	0	0	0	0	0	0	0	1	0	0	0	1	K4-only
NR_045114	PVRL3-AS1	cg08889687	0	1	0	0	0	0	0	0	0	0	0	0	0	0	1	K4-only
NM_001010877	ZNF311	cg00105025;cg08390760;cg09435617;cg15171221;cg20594345;cg21310336;cg22185558;cg22748740;cg26127652;cg26883712	0	0	0	0	0	0	0	0	0	0	0	0	0	1	1	K4-only
NM_024907	FBXO17	cg03724964;cg06244497;cg07551545;cg10742957;cg14206172;cg15177902;cg25806307	0	0	0	0	0	0	0	0	0	0	1	0	0	0	1	K4-only
NM_001136019	FCGRT	cg00586700;cg08059845;cg09293816;cg11847636;cg15528736;cg18081863	0	1	0	0	0	0	0	0	0	0	0	0	0	0	1	K4-only
NM_002084	GPX3	cg08891071;cg10802379;cg13081720;cg18849169;cg21504918;cg21516478;cg26638444	0	0	0	0	0	0	0	0	0	0	1	0	0	0	1	K4-only
NM_001098821	TMEM91	cg07663732;cg08136809	0	0	0	0	0	0	0	0	0	0	1	0	0	0	1	K4-only
NM_000812	GABRB1	cg00202441;cg02968741;cg12294121;cg18016365	0	0	0	0	0	0	0	0	0	0	0	0	0	1	1	K4-only
NM_020169	LXN	cg04911005;cg07654934;cg08263647;cg08538682;cg12896421;cg14019186;cg17481912;cg17977250;cg22210627;cg25727025;cg27533704	0	0	0	1	0	0	0	0	0	0	0	0	0	0	1	K4-only
NR_036508	LOC100128398	cg01214989;cg08397818;cg12259537;cg25480379	0	0	1	0	0	0	0	0	0	0	0	0	0	0	1	K4-only
NM_022103	ZNF667	cg00502665;cg03289872;cg05508084;cg24464397;cg24732137;cg26612735	0	0	0	0	0	0	0	0	0	0	0	1	0	0	1	K4-only
NM_001256139	CAPG	cg02242344;cg07245678;cg09337254;cg16437908;cg16838838;cg21654383	0	0	0	0	0	0	0	0	0	0	1	0	0	0	1	K4-only
NM_181553	CMTM3	cg00355909;cg03860859;cg06445928;cg08601917;cg08682544;cg09233013;cg23297477;cg26560414;cg26658728	0	0	1	0	0	0	0	0	0	0	0	0	0	0	1	K4-only
NM_004061	CDH12	cg10303842;cg18394953;cg26227411	0	0	1	0	0	0	0	0	0	0	0	0	0	0	1	K4-only
NM_005325	HIST1H1A	cg05816193;cg11282676;cg14652095;cg14703002;cg15741433;cg19082069;cg23829024	0	0	0	0	0	0	0	0	0	0	0	0	0	1	1	K4-only
NM_181756	ZNF233	cg01278873;cg07894352;cg14531862;cg15904523	0	0	0	0	0	1	0	0	0	0	0	0	0	0	1	K4-only
NR_036521	ZNF667-AS1	cg00502665;cg03289872;cg08063125;cg24464397;cg26612735	0	0	0	0	0	0	0	0	0	0	0	1	0	0	1	K4-only
NM_000852	GSTP1	cg02659086;cg04920951;cg06928838;cg26250609	0	0	0	0	0	0	0	0	0	0	1	0	0	0	1	K4-only
NM_001172831	ZNF300	cg02343823;cg04675542;cg08580836;cg11291313;cg18237551;cg19014419;cg21521779	0	0	0	0	0	0	0	0	0	0	0	0	0	1	1	K4-only
NR_038845	LOC643723	cg02665570;cg03221247;cg05062446;cg05460949;cg15558129;cg16681597;cg26757053	0	0	0	0	0	0	0	0	0	0	0	0	0	1	1	K4-only
NM_031422	CHST9	cg01960885;cg06619066;cg10363951;cg13533151;cg16933181;cg21895526;cg24228329;cg26807767	0	0	1	0	0	0	0	0	0	0	0	0	0	0	1	K4-only
NM_019090	MAP10	cg02903907	0	0	0	0	0	0	0	0	0	0	0	0	0	1	1	K4-only
NM_006317	BASP1	cg19078576;cg23496260	0	0	0	0	0	0	0	0	0	0	0	0	1	0	1	K4-only
NM_001010940	C9orf135	cg00650176;cg14359824	0	0	0	0	0	0	0	0	0	0	0	0	0	1	1	K4-only
NM_003355	UCP2	cg02586551;cg04361852;cg10064339;cg22984786;cg26954736	0	0	0	0	0	0	1	0	0	0	0	0	0	0	1	K4-only
NM_021925	C2orf43	cg01203385;cg01816515;cg09109450;cg14903097;cg20248458;cg25608973;cg26625629	0	0	0	0	0	0	0	0	0	0	1	0	0	0	1	K4-only
NM_004664	LIN7A	cg05647859;cg08480223;cg14874351;cg17061244;cg19347790;cg23441441;cg25024670	0	0	0	1	0	0	0	0	0	0	0	0	0	0	1	K4-only
NM_003534	HIST1H3G	cg00036011;cg01563704;cg02481934;cg02909790;cg11731890;cg14273822;cg23944005;cg24066601;cg24955592	0	0	0	0	0	0	0	0	0	0	1	0	0	0	1	K4-only
NM_152484	ZNF569	cg03884783;cg05218976;cg06328724;cg08630279;cg08888354;cg14142713;cg18244915;cg25451874;cg27123533	0	0	0	0	0	0	0	0	0	0	0	0	1	0	1	K4-only
NM_001080407	GLB1L3	cg03108229;cg03315869;cg03323292;cg05621343;cg09395318;cg13491690;cg18375494;cg21692846;cg23170850;cg25999867	0	0	1	0	0	0	0	0	0	0	0	0	0	0	1	K4-only
NM_177405	CECR1	cg13248581;cg17333767;cg24127748;cg27534599	0	0	0	0	0	0	0	0	0	0	0	0	0	1	1	K4-only
NM_145182	PYCARD	cg02900356;cg05214748;cg05361373;cg05907835;cg08730348;cg09115984;cg09866102;cg12100791;cg15247144;cg15468095	0	0	0	0	0	0	0	0	0	0	1	0	0	0	1	K4-only
NM_001256281	NARR	cg02530437;cg03452174;cg08032476;cg08839210;cg18686527;cg19982230;cg21237418;cg21816330;cg22803868	0	0	0	0	0	0	0	0	0	0	1	0	0	0	1	K4-only
NM_032423	ZNF528	cg03077453;cg03091337;cg08188890;cg08525430;cg09267217;cg12950007;cg13672300;cg14025336;cg20725941;cg22935432;cg27258025	0	0	1	0	0	0	0	0	0	0	0	0	0	0	1	K4-only
NM_031864	PCDHA12	cg09852127;cg13295463;cg14557699	0	0	0	0	0	0	0	0	0	0	0	0	0	1	1	K4-only
NM_006931	SLC2A3	cg02511315;cg02591487;cg20313963;cg20972214	0	0	0	0	0	0	0	0	0	0	0	0	0	1	1	K4-only
NM_002515	NOVA1	cg15602241;cg18488855;cg20478129;cg20961943	0	0	1	0	0	0	0	0	0	0	0	0	0	0	1	K4-only
NM_004334	BST1	cg00731785;cg13528854	0	0	0	0	0	0	0	0	0	0	0	0	0	1	1	K4-only
NM_031859	PCDHA10	cg07240873;cg19810034	0	0	0	0	0	0	0	0	1	0	0	0	0	0	1	K4-only
NM_002994	CXCL5	cg00721170;cg04559909;cg07868155;cg10088985;cg13215970;cg16055869;cg27109129	0	0	0	0	0	0	0	0	1	0	0	0	0	0	1	K4-only
NM_001256277	RAB34	cg03452174;cg08032476;cg08839210;cg19982230;cg21237418;cg22803868	0	0	0	0	0	0	0	0	0	0	1	0	0	0	1	K4-only
NM_000038	APC	cg00577935;cg01240931;cg02511809;cg03667968;cg08571859;cg11613015;cg12534150;cg14479889;cg14511739;cg15020645;cg16970232;cg20311501;cg21634602;cg22035501;cg23938220;cg24332422	0	0	0	0	0	0	0	0	0	0	1	0	0	0	1	K4-only
NM_015526	CLIP3	cg00819362;cg02401399;cg21647257;cg22719241	0	0	0	0	0	0	0	0	0	0	0	0	0	1	1	K4-only
NM_052896	CSMD2	cg01445580;cg02492778;cg15654121;cg19228118;cg23442151;cg24236085;cg24558425	0	0	1	0	0	0	0	0	0	0	0	0	0	0	1	K4-only
NM_023940	RASL11B	cg00338735;cg10269548;cg14704921;cg23337116	0	0	0	0	0	0	1	0	0	0	0	0	0	0	1	K4-only
NR_103448	ZNF192P1	cg08968635;cg12963246;cg17949981;cg19592336;cg20151795;cg22143856;cg23161317;cg23281280;cg24036830	0	0	0	0	0	0	0	0	0	0	0	0	0	1	1	K4-only
NM_001276713	ANKDD1B	cg07671805;cg08253296;cg27379109	0	0	0	0	0	0	0	0	0	0	1	0	0	0	1	K4-only
NM_016339	RAPGEFL1	cg00578638;cg02059867;cg02722657;cg04178858;cg14603620;cg14905632;cg15826437;cg25813864	0	0	0	0	0	0	0	0	0	0	1	0	0	0	1	K4-only
NR_001566	TERC	cg01389761;cg12615982;cg15494117;cg15599946;cg17527574;cg20839041;cg23036508;cg24333189;cg25090302;cg27020690	0	0	0	0	0	0	0	0	0	0	0	0	0	1	1	K4-only
NR_003582	ATP8B5P	cg21209395	0	0	0	0	0	0	0	0	0	0	0	0	0	1	1	K4-only
NM_181354	OXR1	cg00298796;cg07554329;cg16326979;cg17136799;cg17176732;cg17212289;cg26622232	0	0	0	0	0	1	0	0	0	0	0	0	0	0	1	K4-only
NM_013959	NRG1	cg20541191	0	0	0	0	0	0	0	0	1	0	0	0	0	0	1	K4-only
NM_030666	SERPINB1	cg00031256;cg07635623;cg08542865;cg11393995;cg14652638;cg15199326;cg27056119	0	0	0	0	0	0	0	0	0	0	1	0	0	0	1	K4-only
NM_001145404	ZNF506	cg08339762;cg09961645;cg10837488;cg12187115;cg21517320;cg22094706;cg24056307	0	0	0	0	0	0	0	0	0	0	0	0	0	1	1	K4-only
NM_173658	ZNF660	cg01139508;cg01313977;cg03340649;cg11542789;cg15372508;cg15767406;cg17536166;cg19629053;cg21771463;cg22598028	0	0	1	0	0	0	0	0	0	0	0	0	0	0	1	K4-only
NM_001256113	TDRP	cg03294066;cg07233677;cg13923530	0	0	1	0	0	0	0	0	0	0	0	0	0	0	1	K4-only
NM_000277	PAH	cg15963417;cg16085568;cg16188209;cg18919225;cg24167314;cg24759821	0	0	0	0	0	0	0	0	0	0	1	0	0	0	1	K4-only
NM_138980	MAPK10	cg12225220;cg14578894;cg17485454	0	0	0	0	0	0	0	0	0	0	1	0	0	0	1	K4-only
NM_001099218	RAD51AP2	cg03002352;cg04804377;cg07709606;cg10167837;cg15124757;cg21642176;cg25565383;cg26119367	0	0	0	0	0	0	0	0	0	0	1	0	0	0	1	K4-only
NM_004817	TJP2	cg04003500;cg13651833	1	0	0	0	0	0	0	0	0	0	0	0	0	0	1	K4-only
NM_001098808	C9orf129	cg01230325;cg10065823	0	0	0	0	0	0	0	0	0	0	0	0	0	1	1	K4-only
NM_001258023	GRIA1	cg08578734	0	1	0	0	0	0	0	0	0	0	0	0	0	0	1	K4-only
NR_038833	C9orf135-AS1	cg00650176;cg14359824	0	0	0	0	0	0	0	0	0	0	0	0	0	1	1	K4-only
NM_052969	RPL39L	cg05882938;cg06190677;cg07441272;cg07681728;cg07693270;cg13432744;cg24524308	0	0	1	0	0	0	0	0	0	0	0	0	0	0	1	K4-only
NM_032918	RERG	cg03028472;cg08830758;cg12304599;cg16173736;cg18768453;cg19006060;cg19205533;cg24979348;cg25283609	0	0	1	0	0	0	0	0	0	0	0	0	0	0	1	K4-only
NM_001145434	ZNF880	cg02627531;cg03005603;cg09313053;cg13393110;cg14224937;cg17650272;cg22632069;cg27558396	0	0	1	0	0	0	0	0	0	0	0	0	0	0	1	K4-only
NM_001113382	FER1L5	cg01876130;cg02582940;cg17318863	0	0	0	0	0	0	0	0	0	0	1	0	0	0	1	K4-only
NM_004686	MTMR7	cg00004996;cg02490989;cg04792712;cg06763054;cg08231493;cg11377730;cg12296772;cg15600488;cg15852516;cg23845889	0	0	0	0	0	0	0	0	0	0	1	0	0	0	1	K4-only
NM_001145668	CTXN2	cg00508024;cg06625816;cg12556555;cg23705224	0	0	0	0	0	0	0	0	0	0	0	0	0	1	1	K4-only
NM_001271629	MEF2D	cg06759845;cg11739633;cg17036007;cg24642236;cg26121730	0	0	0	0	0	0	0	0	0	0	0	0	0	1	1	K4-only
NM_015669	PCDHB5	cg03349953;cg05579030;cg09782097;cg18021368;cg19568544;cg24583624	0	0	0	0	0	0	0	0	0	0	0	0	0	1	1	K4-only
NM_001271442	C21orf2	cg11023456	0	0	0	0	0	0	0	0	0	0	0	0	0	1	1	K4-only
NM_203371	FIBIN	cg01649773;cg02565993;cg04622802;cg07042914;cg07777008;cg10418755;cg15621260	0	0	0	0	0	0	0	0	0	0	1	0	0	0	1	K4-only
NM_018260	ZNF701	cg04768713;cg05231834;cg07528613;cg10458142;cg10598034;cg10782349;cg11904204;cg12003318;cg18765463;cg20125424;cg21902754	0	0	0	1	0	0	0	0	0	0	0	0	0	0	1	K4-only
NR_103793	LOC100996342	cg03282993;cg06561329;cg12441967;cg18137704;cg22059073	0	0	0	0	0	0	0	0	0	0	1	0	0	0	1	K4-only
NM_003535	HIST1H3J	cg17718302;cg17965019;cg24817154;cg25529393	0	0	0	0	0	0	0	0	0	0	1	0	0	0	1	K4-only
NM_018018	SLC38A4	cg04094478;cg07102229;cg11146691;cg11331445;cg14671384;cg15584813;cg17501823;cg18064171;cg21428710;cg22049899	0	0	0	0	0	0	0	0	1	0	0	0	0	0	1	K4-only
NM_003186	TAGLN	cg10130564;cg11861562;cg15534755;cg16524733;cg24619694;cg26566898	0	0	0	0	0	0	0	0	0	0	0	0	0	1	1	K4-only
NM_004695	SLC16A5	cg04305621;cg04529938;cg06594281;cg09300114;cg10829727;cg13424870;cg17733616;cg21306329;cg27619475	0	0	0	0	0	0	0	0	0	0	1	0	0	0	1	K4-only
NM_014989	RIMS1	cg01276475;cg02916312;cg06952471;cg09342766;cg09697403;cg11092616;cg14101302;cg14224762;cg23473285;cg26717983	0	0	1	0	0	0	0	0	0	0	0	0	0	0	1	K4-only
NR_073458	TMEM220-AS1	cg00549475;cg01275588;cg02025583;cg08989441	0	1	0	0	0	0	0	0	0	0	0	0	0	0	1	K4-only
NM_001199295	ZNF549	cg01601746;cg06458239;cg07054095;cg10729426;cg13644629;cg16697731;cg17684296;cg19060970;cg20607331	0	0	1	0	0	0	0	0	0	0	0	0	0	0	1	K4-only
NR_003263	SDHAP3	cg06721546;cg08422420;cg08778598;cg17597639;cg21167402;cg21931717;cg23189951;cg24960960;cg26472636;cg27149073;cg27378537	0	0	0	1	0	0	0	0	0	0	0	0	0	0	1	K4-only
NM_170606	KMT2C	cg17322443;cg19258062;cg25320562	0	0	0	0	0	0	0	0	0	0	0	0	0	1	1	K4-only
NR_003581	ATP8B5P	cg21209395	0	0	0	0	0	0	0	0	0	0	0	0	0	1	1	K4-only
NM_183001	SHC1	cg04995846;cg06186450;cg12473916;cg16254756;cg22018051	0	0	0	0	0	0	0	0	0	0	0	0	0	1	1	K4-only
NM_001012414	TRIM61	cg05767411;cg11512289;cg11955878;cg13023646;cg14038058;cg16691177;cg25147158;cg25219188	0	0	0	0	0	0	0	0	0	0	0	0	0	1	1	K4-only
NM_001004317	LIN28B	cg04171392;cg04560456	0	0	0	0	0	0	0	0	0	0	1	0	0	0	1	K4-only
NR_103553	LIFR-AS1	cg03723506;cg11841722;cg12587766;cg12602374;cg18174928;cg18848688;cg20699036	0	0	1	0	0	0	0	0	0	0	0	0	0	0	1	K4-only
NM_032376	TMEM101	cg01635193;cg01986131;cg04879755;cg06511389;cg08372947;cg12259256;cg13847066;cg18801599;cg24638647;cg25868286;cg27116819	0	0	0	0	0	0	0	0	0	0	0	0	0	1	1	K4-only
NR_037619	CMTM3	cg00355909;cg03860859;cg06445928;cg08601917;cg08682544;cg09233013;cg23297477;cg26560414;cg26658728	0	0	1	0	0	0	0	0	0	0	0	0	0	0	1	K4-only
NM_001510	GRID2	cg01718739;cg05873487;cg09111223;cg13243169;cg13549845;cg13952745;cg25617092	0	0	1	0	0	0	0	0	0	0	0	0	0	0	1	K4-only
NM_001122659	EDNRB	cg01910869;cg03086857;cg04390523;cg06179060;cg10016380;cg12602112;cg12847373;cg13434989;cg13818654;cg15699226;cg15836660;cg16571983;cg18032190;cg19650157;cg19742055;cg19916212;cg22310279;cg23316360;cg23766591;cg24236409;cg26622320	0	0	0	0	0	0	0	0	0	0	0	1	0	0	1	K4-only
NM_001024599	HIST2H2BF	cg04888113;cg10975873	0	0	0	0	0	0	0	0	0	0	0	0	0	1	1	K4-only
NR_040245	LINC00941	cg03476860;cg07139284;cg08949339;cg12064372;cg17037963;cg24091995;cg24684077	0	1	0	0	0	0	0	0	0	0	0	0	0	0	1	K4-only
NM_000940	PON3	cg03301582;cg03605686;cg04080282;cg04685170;cg07121856;cg08167951;cg08520743;cg08828819;cg08898155;cg11435506;cg15500865;cg15927196;cg22784187;cg23230584;cg25161512;cg25572105;cg26457160;cg27413563	0	0	0	0	0	0	0	0	0	0	0	0	0	1	1	K4-only
NR_027481	ZNF876P	cg08744727;cg11836119;cg12547166;cg13535626;cg13657785;cg14186187;cg18005867;cg23063647	0	0	0	0	0	0	0	0	0	0	0	0	0	1	1	K4-only
NM_001142649	ANO5	cg09968630;cg13205384;cg15397076;cg18131689;cg19639184;cg20115218;cg20634738;cg27113440	0	0	1	0	0	0	0	0	0	0	0	0	0	0	1	K4-only
NM_001185055	ADD2	cg08132931;cg08857144;cg22370480;cg24347663	0	0	1	0	0	0	0	0	0	0	0	0	0	0	1	K4-only
NM_000851	GSTM5	cg05376982;cg12858902;cg14377951;cg20803293;cg22864244;cg23719124;cg24467349;cg25210835;cg25593510	0	0	0	0	0	0	0	0	0	0	0	0	0	1	1	K4-only
NR_027120	HSD52	cg08625289;cg19526130;cg26246897	0	0	0	0	0	0	0	0	0	0	1	0	0	0	1	K4-only
NM_001204837	ZNF568	cg02370417;cg02459604;cg03060201;cg03443751;cg03584288;cg15322783;cg15746891;cg20154403;cg21292152;cg21761844;cg24052101;cg26612849	0	0	1	0	0	0	0	0	0	0	0	0	0	0	1	K4-only
NM_016152	RARB	cg02499249;cg03428864;cg03481274;cg06720425;cg10712623;cg12479047;cg16927871;cg18094781;cg19003815;cg20899354;cg24396624;cg26124016;cg26786980	0	0	0	0	0	0	0	0	0	0	1	0	0	0	1	K4-only
NM_001103149	PNMAL1	cg06851207;cg10788735;cg14750269;cg17296166;cg17787159;cg22824998;cg24221541;cg27201673	0	0	0	1	0	0	0	0	0	0	0	0	0	0	1	K4-only
NM_003948	CDKL2	cg02466113;cg02675308;cg03757145;cg05982271;cg10344081;cg14263942;cg14988503;cg21195185;cg24432073;cg25060172;cg26173997	0	0	0	0	0	0	1	0	0	0	0	0	0	0	1	K4-only
NR_038453	UNC5B-AS1	cg14957186	0	0	0	0	0	0	0	0	0	0	1	0	0	0	1	K4-only
NM_006690	MMP24	cg12483876;cg15270813	0	0	0	0	0	1	0	0	0	0	0	0	0	0	1	K4-only
NM_032219	MFSD7	cg02096793;cg14876761;cg17121747;cg17952262;cg24693053	0	0	0	0	0	0	0	0	1	0	0	0	0	0	1	K4-only
NM_001127671	LIFR	cg03723506;cg12587766;cg12602374;cg18174928;cg20699036	0	0	1	0	0	0	0	0	0	0	0	0	0	0	1	K4-only
NM_021018	HIST1H3F	cg02578368;cg05414338;cg06254453;cg14808890;cg15386964;cg17332573;cg19247350;cg21663122;cg23841066	0	0	0	0	0	0	1	0	0	0	0	0	0	0	1	K4-only
NM_004102	FABP3	cg07345934;cg14407437;cg15833534;cg18368411;cg19316148;cg20318096	0	0	0	0	0	0	0	0	0	0	1	0	0	0	1	K4-only
NM_003290	TPM4	cg11905624;cg13618979;cg15233183;cg16232979;cg23183906;cg25593560;cg26968812	0	0	0	0	0	0	0	0	0	0	1	0	0	0	1	K4-only
NM_001101372	IGLON5	cg05630016;cg09928766;cg16980637;cg25728174	0	0	1	0	0	0	0	0	0	0	0	0	0	0	1	K4-only
NM_024915	GRHL2	cg03780851;cg11397370;cg14202477;cg16435779;cg18004756;cg20574490;cg23973429;cg25330243;cg25639415	0	0	0	0	0	0	1	0	0	0	0	0	0	0	1	K4-only
NM_001256545	MEGF10	cg03721362;cg04280969;cg04609576;cg06940792;cg08874609;cg23018092;cg26465611;cg27346707;cg27372162	0	0	1	0	0	0	0	0	0	0	0	0	0	0	1	K4-only
NM_001936	DPP6	cg05640128;cg06002683;cg07590961;cg10552126;cg13544851;cg21389309	0	0	0	0	0	0	0	0	0	0	0	0	0	1	1	K4-only
NM_002300	LDHB	cg00501628;cg00753478;cg02659794;cg03243946;cg04354474;cg05578357;cg06437004;cg08148261;cg09118312;cg10483825;cg13665266;cg14209005;cg19878987;cg20717612;cg26800162	0	0	0	0	0	0	1	0	0	0	0	0	0	0	1	K4-only
NM_003532	HIST1H3E	cg01840333;cg03234702;cg07922606;cg11436222;cg13836098;cg26092675	0	0	0	0	0	0	0	0	0	0	0	0	0	1	1	K4-only
NM_024579	C1orf54	cg03763518	0	1	0	0	0	0	0	0	0	0	0	0	0	0	1	K4-only
NM_001200049	TTC40	cg01757745;cg07421032;cg23563927;cg23962250;cg24025893;cg25745697;cg26450740	0	0	1	0	0	0	0	0	0	0	0	0	0	0	1	K4-only
NM_020657	ZNF304	cg00397851;cg07494047;cg10157975;cg13788592;cg14015503;cg16848116;cg21627760;cg22376081;cg23250910	0	0	1	0	0	0	0	0	0	0	0	0	0	0	1	K4-only
NM_014141	CNTNAP2	cg04706867;cg05749717;cg07028533;cg07612562;cg09571420;cg11592503;cg11642382;cg16521917;cg16910830;cg21126583;cg23708361;cg24887139	0	0	1	0	0	0	0	0	0	0	0	0	0	0	1	K4-only
NR_038279	LINC00665	cg02810156;cg21808240;cg22456785;cg23044017;cg23054584;cg24027100	0	0	0	0	0	0	0	0	0	0	0	1	0	0	1	K4-only
NM_054108	HRASLS5	cg00286984;cg01967055;cg02399524;cg03932723;cg09952395;cg13112361;cg19570321;cg22250498;cg23728669	0	0	0	0	0	0	0	0	0	0	1	0	0	0	1	K4-only
NM_001206480	ELMO1	cg04136149;cg06338562;cg07122245;cg08453021;cg11021995;cg11372090;cg15067340;cg15947096;cg17350006;cg17780595;cg17966167;cg19118812;cg25472353	0	0	0	0	0	0	0	0	0	0	0	0	1	0	1	K4-only
NM_024557	RIC3	cg03707776;cg08383315;cg13788027;cg17603132;cg25098208;cg25778535	0	0	0	0	0	0	0	0	0	0	0	0	0	1	1	K4-only
NM_003108	SOX11	cg08165221;cg12312988;cg18449120;cg18863333;cg20008332	0	0	0	0	0	0	0	0	0	0	0	0	0	1	1	K4-only
NM_001080464	ASPG	cg05321225;cg07150062;cg10761315;cg20965743;cg25307074;cg26195482	0	1	0	0	0	0	0	0	0	0	0	0	0	0	1	K4-only
NM_006103	WFDC2	cg00700485;cg00980978;cg06385187;cg14151783;cg21963535;cg23740882;cg25799986;cg26348514	0	0	0	0	0	0	0	0	0	0	1	0	0	0	1	K4-only
NM_001145543	ZSCAN18	cg06243556;cg07369950;cg07657064;cg07924874;cg14972743;cg15498379;cg18428688;cg18888520;cg21653184;cg22721334;cg23229395;cg24447095;cg25784220	0	0	1	0	0	0	0	0	0	0	0	0	0	0	1	K4-only
NM_001864	COX7A1	cg15176213	0	0	0	0	0	0	0	0	0	0	0	0	0	1	1	K4-only
NM_001242525	HLA-DPA1	cg01132696;cg02197634;cg03229061;cg06437840;cg09059466;cg09234582;cg10850215;cg13349035;cg17588455;cg19053046;cg19990651;cg25045942;cg25491704	0	0	0	0	0	0	0	0	0	0	0	0	0	1	1	K4-only
NM_001207005	ZNF233	cg01278873;cg07894352;cg14531862;cg15904523	0	0	0	0	0	1	0	0	0	0	0	0	0	0	1	K4-only
NM_001142533	SH2D3C	cg13737221;cg13828227;cg23313665	0	0	0	0	1	0	0	0	0	0	0	0	0	0	1	K4-only
NM_020433	JPH2	cg02551396;cg05817845;cg12149609;cg26040816	0	0	0	0	0	0	0	0	0	0	1	0	0	0	1	K4-only
NM_001134441	ZNF502	cg04974323;cg10263370;cg11003573;cg13919821;cg14768256;cg15604051;cg15687855;cg18722847;cg21672276;cg25151919	0	0	0	0	0	0	0	0	0	0	0	0	0	1	1	K4-only
NM_001145288	SLC17A8	cg06563300;cg06836849;cg13861294;cg14077898;cg21116900;cg21429394;cg21961771;cg24446178	0	0	0	0	0	0	0	0	0	0	1	0	0	0	1	K4-only
NM_033066	MPP4	cg01786466;cg20169521;cg22706505	0	0	0	0	0	0	0	0	0	0	0	0	0	1	1	Unmarked
NM_001112720	LIMCH1	cg00957901;cg02951847	0	0	0	0	0	0	0	0	0	0	1	0	0	0	1	Unmarked
NM_001135197	CCDC36	cg01454592;cg02938205;cg03352189;cg03540175;cg04581018;cg12468774	0	1	0	0	0	0	0	0	0	0	0	0	0	0	1	Unmarked
NM_001042669	ARHGAP24	cg05688618	0	0	0	0	1	0	0	0	0	0	0	0	0	0	1	Unmarked
NM_001136537	BTBD19	cg00043599;cg03434029;cg11332928;cg11448683;cg14565781	0	0	0	0	0	0	0	0	0	0	0	0	0	1	1	Unmarked
NR_001282	PCDHB19P	cg10553103;cg19727801;cg25010500	0	0	0	0	0	0	0	0	0	0	0	0	0	1	1	Unmarked
NM_014012	REM1	cg02658488;cg10599900;cg12153542;cg12912737;cg13513864;cg15489979;cg18615051;cg26299767	0	0	1	0	0	0	0	0	0	0	0	0	0	0	1	Unmarked
NM_018915	PCDHGA2	cg03617826;cg11011625;cg18878616;cg23074932;cg23262897	0	0	0	0	0	0	0	0	0	0	0	0	0	1	1	Unmarked
NM_031413	CECR2	cg01010211;cg03408904;cg07197230;cg13762691;cg24074477	0	0	0	0	0	0	0	1	0	0	0	0	0	0	1	Unmarked
NM_006820	IFI44L	cg17980508;cg27315157	0	0	0	0	0	0	0	0	0	0	1	0	0	0	1	Unmarked
NM_004288	CYTIP	cg10559416;cg12177677	0	0	0	0	0	0	0	0	0	0	0	0	1	0	1	Unmarked
NM_001128227	GNE	cg05844977;cg25813936	0	1	0	0	0	0	0	0	0	0	0	0	0	0	1	Unmarked
NM_173648	CCDC141	cg24335070;cg24547885	0	0	0	0	0	0	0	0	0	0	0	0	0	1	1	Unmarked
NM_003648	DGKD	cg02442900;cg08436419;cg23224619;cg25107522	0	0	0	0	0	0	0	0	0	0	0	0	0	1	1	Unmarked
NM_015464	SOSTDC1	cg06126713;cg06363129;cg07220448;cg11417025;cg13864794;cg21817179;cg25533774	0	0	0	0	0	0	0	0	0	0	1	0	0	0	1	Unmarked
NR_038397	DNM3OS	cg02633729;cg03322057;cg17178220;cg21450888;cg24002149;cg25214966	0	0	0	0	0	0	0	0	0	0	0	0	0	1	1	Unmarked
NM_001105540	DGKZ	cg02865822;cg07121644;cg17266233;cg18337963;cg21770622	0	0	0	0	0	0	0	0	0	0	1	0	0	0	1	Unmarked
NR_027902	LINC00303	cg19366877	0	1	0	0	0	0	0	0	0	0	0	0	0	0	1	Unmarked
NM_032054	PCDHGA5	cg01911239;cg13307880;cg14738170;cg16435923;cg17451176;cg19748485	0	0	0	0	0	0	0	0	0	0	0	0	0	1	1	Unmarked
NM_199424	WWP2	cg00005112;cg09419444;cg16516248;cg26860604	0	0	0	0	0	0	0	0	0	0	0	0	0	1	1	Unmarked
NM_016356	DCDC2	cg03960072;cg04515001;cg05347898;cg07054208;cg07791578;cg14069965;cg16306115;cg27252395	0	0	0	0	0	0	1	0	0	0	0	0	0	0	1	Unmarked
NR_036125	MIR1260B	cg06716182	0	0	0	0	0	0	0	0	0	0	1	0	0	0	1	Unmarked
NM_006152	LRMP	cg10150530	0	0	0	0	0	0	0	0	1	0	0	0	0	0	1	Unmarked
NM_001164346	ZBTB20	cg00028135;cg03556243	0	0	0	0	0	0	0	0	0	0	0	0	0	1	1	Unmarked
NM_001257386	ABCG2	cg23706819	0	0	0	0	0	0	0	0	0	0	0	0	0	1	1	Unmarked
NM_152476	ZNF560	cg04062391;cg05221167;cg10638780;cg15222651;cg15834814;cg16646743;cg18568589;cg18712973;cg19254119;cg19544372;cg24818573	0	0	0	0	0	0	0	0	0	0	0	0	0	1	1	Unmarked
NM_001254718	MYBPC1	cg14604777;cg20053885;cg21339822	0	0	0	0	0	1	0	0	0	0	0	0	0	0	1	Unmarked
NM_002922	RGS1	cg02586212;cg10861751	0	0	0	0	0	0	0	0	0	0	0	0	1	0	1	Unmarked
NR_033919	LOC645434	cg25278941	0	0	0	0	0	0	1	0	0	0	0	0	0	0	1	Unmarked
NM_032011	PCDHGA3	cg04438558;cg06742719;cg12608145;cg14468658;cg17588578;cg18781988;cg18839637;cg18839750;cg25657261	0	0	0	0	0	0	0	0	0	0	0	0	0	1	1	Unmarked
NM_006588	SULT1C4	cg05036173;cg10236239;cg14300730;cg17966192;cg19908768	0	0	0	0	0	0	0	0	1	0	0	0	0	0	1	Unmarked
NM_032053	PCDHGA4	cg02867763;cg05043461;cg12487540;cg19037350;cg19595107;cg23930711	0	0	0	0	0	0	0	0	0	0	0	0	0	1	1	Unmarked
NM_003531	HIST1H3C	cg02677388;cg07636178;cg10199913;cg17432453;cg25438963	0	0	0	0	0	0	0	0	0	0	0	0	0	1	1	Unmarked
NM_031305	ARHGAP24	cg13889934;cg14376467;cg21446955;cg22017213	0	0	0	0	0	0	0	0	1	0	0	0	0	0	1	Unmarked
NR_026934	LOC152225	cg05429448;cg12963656	0	0	0	0	0	0	0	0	0	0	0	0	0	1	1	Unmarked
NR_038920	LOC100506314	cg03611265	0	0	0	0	0	0	0	0	0	0	0	0	0	1	1	Unmarked
NR_003366	ANKRD20A8P	cg08463813;cg08721908;cg23363202;cg24524352	0	0	0	0	0	0	0	0	0	0	0	1	0	0	1	Unmarked
NR_024280	UNQ6494	cg01515543	0	0	0	0	0	0	0	0	0	0	0	0	0	1	1	Unmarked
NM_001024603	LOC154872	cg02695609;cg05531482;cg17816357;cg23710748	0	0	0	0	0	0	0	0	0	0	1	0	0	0	1	Unmarked
NM_001031683	IFIT3	cg06460983	0	0	0	0	0	0	0	0	0	0	1	0	0	0	1	Unmarked
NM_031474	NRIP2	cg00830029;cg00922748;cg02852959;cg03126946;cg05194726;cg06997549;cg10231675	0	0	0	0	0	0	0	0	0	0	1	0	0	0	1	Unmarked
NR_046400	DIP2A-IT1	cg12149795	0	0	0	0	0	1	0	0	0	0	0	0	0	0	1	Unmarked
NM_006573	TNFSF13B	cg09158314;cg10864680;cg18703238;cg20945738;cg21143446;cg21784254	0	0	0	0	0	0	0	0	0	0	0	0	0	1	1	Unmarked
NM_001135585	SLC2A5	cg00310940;cg03679305;cg12763828	0	0	0	0	0	0	0	0	0	0	1	0	0	0	1	Unmarked
NM_001193338	FAIM3	cg06640279;cg15158847;cg17460386;cg24107163	0	0	0	0	0	0	0	0	0	0	0	0	1	0	1	Unmarked
NM_014420	DKK4	cg00828762;cg01762581;cg02571142;cg06899970;cg09297903;cg16197636;cg21209091	0	0	0	0	0	0	0	0	0	0	1	0	0	0	1	Unmarked
NM_001977	ENPEP	cg07587796;cg09248380;cg15406387;cg15810415;cg18944383;cg20773127;cg24192671	0	0	0	0	0	0	0	0	0	0	0	0	0	1	1	Unmarked
NM_001128310	SPARCL1	cg15552249;cg19466563	0	0	0	0	0	0	0	0	0	0	0	0	0	1	1	Unmarked
NM_017787	WBP1L	cg03161190;cg09405083;cg14939082;cg15227982;cg17740322;cg17894755;cg23247968;cg25104397;cg26640901;cg27517345	0	0	0	0	0	0	0	0	1	0	0	0	0	0	1	Unmarked
NM_001256536	PRMT8	cg10350722	0	0	0	0	0	0	0	0	0	0	0	0	0	1	1	Unmarked
NM_005693	NR1H3	cg00536939;cg04959790;cg07298473;cg08690459;cg21203569	0	0	0	0	0	0	0	0	0	0	1	0	0	0	1	Unmarked
NM_001099640	TMEM100	cg15945287;cg25683268	0	0	0	0	0	0	0	0	0	0	0	0	0	1	1	Unmarked
NM_001243349	SH3D19	cg10072319;cg14270293	0	1	0	0	0	0	0	0	0	0	0	0	0	0	1	Unmarked
NM_001795	CDH5	cg00044665;cg00401972;cg02078525;cg08872742;cg16471830;cg22319147	0	1	0	0	0	0	0	0	0	0	0	0	0	0	1	Unmarked
NM_000557	GDF5	cg03547924;cg09618904;cg14947478	0	1	0	0	0	0	0	0	0	0	0	0	0	0	1	Unmarked
NM_001130050	DOCK9	cg02799880;cg04821942;cg10811485;cg16624069;cg21712331;cg27518324	0	0	0	0	1	0	0	0	0	0	0	0	0	0	1	Unmarked
NM_001244364	ARHGEF28	cg20417500	0	0	0	0	0	0	0	0	0	0	1	0	0	0	1	Unmarked
NR_049767	SLC7A8	cg06722639;cg23168192	0	0	0	0	0	0	0	0	0	0	0	0	0	1	1	Unmarked
NM_001193544	ANXA6	cg18643093	0	0	0	0	0	0	0	0	0	0	0	0	0	1	1	Unmarked
NM_000090	COL3A1	cg18544564	0	0	0	0	0	0	0	0	0	0	1	0	0	0	1	Unmarked
NM_001127240	BBC3	cg18054578;cg25731261	0	0	0	0	0	0	0	0	0	0	1	0	0	0	1	Unmarked
NM_000230	LEP	cg00666422;cg00840332;cg07464571;cg12782180;cg13381984;cg19594666;cg26814075	0	0	0	0	0	0	0	0	0	0	0	0	0	1	1	Unmarked
NM_004377	CPT1B	cg00047287;cg00270625;cg00983520;cg01081346;cg05156901;cg06530441;cg08260245;cg10770023;cg16386697;cg19112186;cg24363820;cg27502912	0	0	0	0	0	0	0	0	0	0	0	0	0	1	1	Unmarked
NM_000204	CFI	cg00382138	0	0	0	0	0	0	0	0	0	0	1	0	0	0	1	Unmarked
NM_025239	PDCD1LG2	cg07211259	0	1	0	0	0	0	0	0	0	0	0	0	0	0	1	Unmarked
NM_005449	FAIM3	cg06640279;cg15158847;cg17460386;cg24107163	0	0	0	0	0	0	0	0	0	0	0	0	1	0	1	Unmarked
NM_000867	HTR2B	cg04042861;cg06096336	0	0	0	0	0	0	0	0	0	0	1	0	0	0	1	Unmarked
NM_033356	CASP8	cg26842802	0	0	0	0	0	0	0	0	1	0	0	0	0	0	1	Unmarked
NR_027135	ZSCAN18	cg03145999;cg05616010;cg10659886;cg12405983;cg14231297;cg17408527;cg18693673	0	0	0	0	0	0	0	0	0	0	0	0	0	1	1	Unmarked
NR_029618	MIR199A2	cg02633729;cg17178220;cg21450888;cg24002149;cg25214966	0	0	0	0	0	0	0	0	0	0	0	0	0	1	1	Unmarked
NM_021062	HIST1H2BB	cg02221866;cg04800585;cg07701237;cg12588279;cg15387132;cg22478210;cg26028573;cg26426142;cg27635394	0	0	0	0	0	0	0	0	0	0	0	0	0	1	1	Unmarked
NM_145652	WFDC5	cg11626007;cg12096720;cg26342637	0	0	0	0	0	0	0	0	0	0	1	0	0	0	1	Unmarked
NR_026864	PRSS30P	cg00491180;cg01006802;cg07645761;cg10448227;cg27137258	0	1	0	0	0	0	0	0	0	0	0	0	0	0	1	Unmarked
NM_001017920	DAPL1	cg02251393;cg09357934;cg21992932;cg23560546	0	0	0	0	0	0	0	0	0	0	1	0	0	0	1	Unmarked
NR_002305	PDIA3P	cg05774978;cg06901711;cg24947451	0	0	0	0	0	0	0	0	0	0	0	0	0	1	1	Unmarked
NM_052851	STARD13	cg04895345;cg10806639;cg11563844;cg16795307;cg24129390	0	0	0	0	0	0	0	0	0	1	0	0	0	0	1	Unmarked
NM_006182	DDR2	cg00457087;cg00819233;cg06325209;cg17496788;cg21880888;cg22740835	0	0	0	0	0	0	0	0	0	0	0	0	0	1	1	Unmarked
NM_032086	PCDHGA6	cg03835609;cg04637478;cg06757585;cg07717903;cg08616061;cg18054674;cg18705909;cg26843711	0	0	0	0	0	0	0	0	0	0	0	0	0	1	1	Unmarked
NM_014882	ARHGAP25	cg01407235;cg05395210;cg07780630;cg08991742;cg12093662;cg13339825;cg15361661;cg25039325;cg25070482;cg26238936;cg27278086	0	0	0	0	0	0	0	0	0	0	0	0	0	1	1	Unmarked
NM_018993	RIN2	cg06856720;cg12687767	0	0	0	0	0	0	0	0	0	0	0	0	0	1	1	Unmarked
NM_001145137	CPT1B	cg00047287;cg05156901;cg06530441;cg08260245;cg10770023;cg19112186;cg24363820;cg27502912	0	0	0	0	0	0	0	0	0	0	0	0	0	1	1	Unmarked
NM_201526	ISLR	cg03778780;cg24779381	0	0	0	0	0	0	0	0	0	0	0	0	0	1	1	Unmarked
NM_003326	TNFSF4	cg10861599;cg16517394;cg21439763;cg26315984	0	0	0	0	0	0	0	0	0	0	0	0	0	1	1	Unmarked
NM_001025390	AMPD3	cg16715129;cg23619910;cg23937993;cg24283921;cg25968076	0	0	0	0	0	0	0	0	0	0	0	0	0	1	1	Unmarked
NR_036207	MIR4321	cg04052466;cg05345154;cg06615152;cg23218559;cg26000619	0	0	0	0	0	0	0	0	0	0	0	0	0	1	1	Unmarked
NM_145016	GLYATL2	cg18551877	0	0	0	0	0	0	0	0	0	0	1	0	0	0	1	Unmarked
NR_026559	LRRC27	cg02535060;cg05951994;cg07119315;cg10530568;cg21370255;cg22586726;cg25076597	0	0	0	0	0	0	0	0	1	0	0	0	0	0	1	Unmarked
NM_001098199	GPR1	cg09076720	0	0	0	0	0	0	0	0	1	0	0	0	0	0	1	Unmarked
NM_001042483	NUPR1	cg01542023;cg04492847;cg05590982;cg06288570;cg15149645	0	0	0	0	0	0	0	0	0	0	0	0	0	1	1	Unmarked
NM_001159495	BANF2	cg11525020;cg25959149	0	0	0	0	0	0	0	0	0	0	1	0	0	0	1	Unmarked
NM_173512	SLC38A11	cg03464655;cg05339727;cg24777351	0	0	0	0	0	0	0	0	0	0	0	0	0	1	1	Unmarked
NM_182691	SRPK2	cg00365499	0	0	0	0	0	0	0	0	0	0	1	0	0	0	1	Unmarked
NM_020749	MTUS1	cg00121389;cg01993952;cg12548824	0	0	0	0	0	0	0	0	0	0	0	0	0	1	1	Unmarked
NR_027044	LOC440040	cg00606739;cg02937674;cg09176539;cg09469643;cg16857801	0	0	0	0	0	0	0	0	0	0	0	0	0	1	1	Unmarked
NM_001565	CXCL10	cg14622819	0	0	0	0	0	0	0	0	0	0	0	0	0	1	1	Unmarked
NM_006287	TFPI	cg23477967	0	0	0	0	0	0	0	0	0	0	1	0	0	0	1	Unmarked

## Sheet: Hypomethylated genes
Supplemental Table 8B. Gene promoters DNA hypomethylated in 14 TCGA human cancer types compared to corresponding normal (control) tissue and their chromatin state in human ESCs
			Cancer type (1, hypomethylated in cancer; 0, non-hypomethylated in cancer)
RefSeq Accession	Gene Symbol	Probe IDs mapping to Gene Promoter	BLCA	BRCA	COAD	HNSC	KIRC	KIRP	LIHC	LUAD	LUSC	PAAD	PRAD	READ	STAD	UCEC	No. of Cancer types hypomethylated in	hESC chromatin state
NM_001004689	OR2M3	cg05353872;cg06393354	1	0	1	0	0	0	1	0	1	0	0	1	0	1	6	Unmarked
NR_038447	LINC00861	cg19526685	1	0	1	1	0	0	1	0	1	0	0	1	0	0	6	Unmarked
NM_017923	43891	cg15498306	1	0	0	1	1	0	0	0	0	0	1	1	0	1	6	Unmarked
NM_001004477	OR10X1	cg04923174;cg12129480	1	0	1	0	0	0	1	0	0	0	0	1	0	1	5	Unmarked
NM_001004687	OR2L3	cg21207403	1	0	1	0	0	0	1	0	0	0	0	1	0	1	5	Unmarked
NR_026994	LOC340094	cg08596532	1	0	0	0	0	0	1	0	1	0	0	1	0	1	5	Unmarked
NM_001004707	OR4D2	cg08200621	1	0	1	1	0	0	0	0	0	0	0	1	0	1	5	Unmarked
NR_029493	MIR21	cg02515217;cg04276626;cg07181702;cg15759721	0	0	0	0	1	1	1	1	1	0	0	0	0	0	5	K4-only
NM_001030013	NPS	cg05343159	1	0	1	1	0	0	0	0	0	0	0	1	0	1	5	Unmarked
NM_001160325	OR6P1	cg00160262	1	0	0	0	0	0	1	0	0	0	0	1	0	1	4	Unmarked
NR_038907	ALKBH3-AS1	cg12394201	0	0	1	0	1	1	0	0	0	0	0	1	0	0	4	Unmarked
NM_001145095	HHLA1	cg18187729	1	0	1	0	0	0	1	0	0	0	0	1	0	0	4	Unmarked
NR_031609	MIR1204	cg00780520;cg11201447;cg25247520	1	0	0	0	1	0	0	0	1	0	0	1	0	0	4	K4-only
NM_004198	CHRNA6	cg06523556;cg07157107;cg07906724;cg20539142;cg27051318	1	0	1	0	0	0	0	0	1	0	0	1	0	0	4	Unmarked
NM_001204147	HDAC9	cg16925459	1	0	0	0	1	1	1	0	0	0	0	0	0	0	4	Unmarked
NR_001589	HBBP1	cg05133853;cg20785459	0	0	1	0	0	0	1	0	0	0	0	1	0	1	4	Unmarked
NM_001098211	HRH1	cg17571559	1	0	0	0	1	1	0	0	0	0	0	0	1	0	4	Unmarked
NM_001129883	PATE3	cg09752271;cg20737028	1	0	1	0	0	0	1	0	0	0	0	1	0	0	4	Unmarked
NR_026825	RPSAP52	cg20688651;cg25161912	1	0	1	0	0	0	0	0	0	0	0	1	0	1	4	K4-only
NM_003126	SPTA1	cg22730004	1	0	1	0	0	0	0	0	0	0	0	1	0	1	4	Unmarked
NM_207360	ZC3H12D	cg00073460;cg04275695;cg06762457;cg09678939;cg13136655;cg17501395;cg18082788;cg18951352	1	0	0	0	1	1	0	0	0	0	0	0	0	1	4	Unmarked
NM_153289	DEFB119	cg18462653;cg20810997	1	0	1	0	0	0	0	0	0	0	0	1	0	1	4	Unmarked
NM_001015050	ALG1L	cg07473553	1	0	0	1	0	0	0	0	1	0	0	1	0	0	4	Unmarked
NR_037870	LOC100131825	cg20944283	1	0	0	0	0	0	0	0	0	0	0	1	0	1	3	Unmarked
NM_001099746	SYBU	cg04843935;cg08457298;cg18029167	1	0	0	0	0	0	1	0	0	0	0	0	0	1	3	Unmarked
NM_052939	FCRL3	cg08786003;cg17134153;cg25259754	1	0	0	0	0	0	1	0	0	0	0	1	0	0	3	Unmarked
NM_198541	IGFL1	cg05910415;cg25246031	0	0	0	0	0	0	1	0	0	0	0	1	0	1	3	Unmarked
NM_001005471	OR2T6	cg00883837;cg20465661	1	0	0	0	0	0	1	0	0	0	0	1	0	0	3	Unmarked
NM_001079821	NLRP3	cg03505654;cg07313373;cg21919599	1	0	0	1	0	0	1	0	0	0	0	0	0	0	3	Unmarked
NM_181623	KRTAP15-1	cg16812893	1	0	0	0	0	0	1	0	0	0	0	0	0	1	3	Unmarked
NM_054112	DEFB118	cg18456942;cg20312687	1	0	0	0	0	0	1	0	0	0	0	0	0	1	3	Unmarked
NR_046986	KIRREL3-AS2	cg15962313	1	0	1	0	0	0	0	0	0	0	0	1	0	0	3	Unmarked
NM_001012709	KRTAP5-4	cg08240778;cg14267780	1	0	0	0	0	0	1	0	0	0	0	0	0	1	3	Unmarked
NM_006144	GZMA	cg06058187;cg06118312	0	0	1	0	0	0	1	0	0	0	0	1	0	0	3	Unmarked
NM_001161834	C7orf72	cg09857577	0	0	1	0	0	0	0	0	0	0	0	1	0	1	3	Unmarked
NM_001004750	OR51B6	cg00423453;cg12930930	0	0	0	0	0	0	1	0	0	0	0	1	0	1	3	Unmarked
NM_182762	MACC1	cg03840849;cg14085715;cg15749858;cg24704593	1	1	0	0	0	0	0	0	0	0	0	0	0	1	3	K4-only
NM_001004461	OR10A6	cg00444390	0	0	1	0	0	0	0	0	0	0	0	1	0	1	3	Unmarked
NM_001014291	SPRR2G	cg11267802	0	0	1	0	0	0	1	0	0	0	0	1	0	0	3	Unmarked
NM_001130917	LILRA2	cg07280593;cg19486673	0	0	0	1	0	0	1	0	0	0	0	0	0	1	3	Unmarked
NM_033179	OR51B4	cg06353345	0	0	0	0	0	0	1	0	0	0	0	1	0	1	3	Unmarked
NM_001005173	OR52L1	cg27480913	0	0	1	0	0	0	0	0	0	0	0	1	0	1	3	Unmarked
NM_001004745	OR5T1	cg27149471	1	0	0	0	0	0	0	0	0	0	0	1	0	1	3	Unmarked
NM_016352	CPA4	cg01796223	0	0	1	0	0	1	0	0	0	0	0	1	0	0	3	Unmarked
NM_001004703	OR4C46	cg18369913	0	0	1	0	0	0	0	0	0	0	0	1	0	1	3	Unmarked
NM_181617	KRTAP21-2	#N/A	1	0	0	0	0	0	0	0	0	0	0	1	0	1	3	Unmarked
NM_030903	OR2W1	cg01947943	0	0	1	0	0	0	0	0	0	0	0	1	0	1	3	Unmarked
NM_006269	RP1	cg00202568	1	0	0	0	0	0	1	0	0	0	0	1	0	0	3	Unmarked
NM_031282	FCRL4	cg01612158	0	0	1	0	0	0	1	0	0	0	0	1	0	0	3	Unmarked
NM_001010857	LELP1	cg00298977;cg02886578	0	0	0	0	0	0	1	0	0	0	0	1	0	1	3	Unmarked
NM_032571	EMR3	cg07072643;cg07998554;cg13973985;cg15552238;cg15746620	1	0	0	0	0	0	1	0	0	0	0	0	0	1	3	Unmarked
NM_001004753	OR51F2	cg18352935	1	0	0	0	0	0	1	0	0	0	0	0	0	1	3	Unmarked
NR_024204	LINC00152	cg00863099	0	0	1	0	0	0	0	0	0	0	0	1	1	0	3	Unmarked
NM_182560	C14orf177	cg06906435;cg24169915	0	0	1	0	0	0	1	0	0	0	0	1	0	0	3	Unmarked
NM_001003443	OR56A3	cg07041214	0	0	0	0	0	0	1	0	0	0	0	1	0	1	3	Unmarked
NM_001011878	DEFB121	cg04476891;cg14727409;cg23204384	1	0	1	0	0	0	0	0	0	0	0	1	0	0	3	Unmarked
NM_172373	ELF1	cg02632314	1	0	0	0	0	0	0	0	1	0	0	0	0	1	3	Unmarked
NM_004367	CCR6	cg09487078	1	0	0	1	0	0	0	0	1	0	0	0	0	0	3	Unmarked
NM_001033017	DEFB135	cg03265268;cg05226729;cg22743884	1	0	0	0	0	1	0	0	0	0	0	1	0	0	3	Unmarked
NM_006526	ZNF217	cg09029902;cg17098965;cg20979153	0	0	0	0	1	1	0	0	0	0	0	0	0	1	3	Unmarked
NR_033893	LOC286186	cg00562430;cg07143815	1	0	0	0	0	0	0	0	0	0	0	0	0	1	2	Unmarked
NR_024480	LINC00887	cg07141504;cg13335054;cg18677603	0	0	0	0	1	1	0	0	0	0	0	0	0	0	2	Unmarked
NM_000519	HBD	cg09751515	0	0	0	1	0	0	1	0	0	0	0	0	0	0	2	Unmarked
NM_000811	GABRA6	cg22672790	0	0	1	0	0	0	0	0	0	0	0	0	0	1	2	Unmarked
NM_182507	KRT80	cg00280812;cg03747456;cg04472592;cg16432350;cg20225745;cg24174145	1	0	0	0	0	0	0	0	0	0	0	0	0	1	2	Unmarked
NM_032587	CARD6	cg05305046;cg05981038;cg16250754;cg26818786	0	0	1	0	0	0	0	0	0	0	0	1	0	0	2	K4-only
NR_024075	EMR4P	cg11579116	1	0	0	0	0	0	0	0	0	0	0	0	0	1	2	Unmarked
NM_001168499	CNDP2	cg25817165;cg26446133;cg27029518	0	0	0	0	0	1	0	0	0	0	0	0	0	1	2	Unmarked
NM_001004058	OR8K5	cg11371231	0	0	1	0	0	0	0	0	0	0	0	1	0	0	2	Unmarked
NM_181727	SPATA12	cg13745870;cg20749059	0	0	0	0	0	1	0	0	0	0	0	0	0	1	2	Unmarked
NM_004335	BST2	cg01254505;cg01329005;cg11558551;cg12090003;cg16363586	0	0	0	1	1	0	0	0	0	0	0	0	0	0	2	K4-only
NR_027753	HHATL	cg07864883;cg24576945;cg24938727	0	0	0	1	0	0	0	0	0	0	0	0	0	1	2	Unmarked
NM_003761	VAMP8	cg04877910;cg05486094;cg05656364;cg12542933	1	0	0	0	0	0	0	0	0	0	0	0	0	1	2	K4-only
NM_002964	S100A8	cg09174555;cg20070090;cg20335425;cg24898863	0	0	0	0	0	0	1	0	0	0	0	0	0	1	2	Unmarked
NM_022728	NEUROD6	cg11554507;cg26312920	1	0	0	0	0	0	1	0	0	0	0	0	0	0	2	Unmarked
NM_000584	IL8	cg16468729	0	0	0	0	1	1	0	0	0	0	0	0	0	0	2	Unmarked
NM_000372	TYR	cg14705695;cg25941151	0	0	1	0	0	0	0	0	0	0	0	1	0	0	2	Unmarked
NM_001035230	RABGAP1L	cg13130398	0	1	0	0	0	0	0	0	0	0	0	0	0	1	2	K4-only
NM_152687	GAPT	cg26453169	0	0	1	0	0	0	0	0	0	0	0	1	0	0	2	Unmarked
NM_001010893	SLC10A5	cg02573176	0	0	0	0	0	0	0	0	0	0	0	1	0	1	2	Unmarked
NM_001005179	OR56A4	cg12656312	0	0	0	0	1	0	0	0	0	0	0	0	0	1	2	Unmarked
NM_021094	SLCO1A2	#N/A	0	0	1	0	0	0	0	0	0	0	0	1	0	0	2	Unmarked
NM_002639	SERPINB5	cg08411049;cg11862144;cg15422147;cg20490031;cg20837735;cg26753302	1	0	0	0	0	0	0	0	0	0	0	0	0	1	2	Unmarked
NM_006408	AGR2	cg21201572;cg24426405	1	0	0	0	0	0	0	0	0	0	0	0	0	1	2	Unmarked
NM_001004701	OR4C16	cg22665383	1	0	0	0	0	0	0	0	0	0	0	0	0	1	2	Unmarked
NM_001005198	OR8G5	cg22476960	0	0	0	0	0	0	0	0	0	0	0	1	0	1	2	Unmarked
NM_001013358	OR9G9	cg11052535	0	0	1	0	0	0	0	0	0	0	0	1	0	0	2	Unmarked
NM_001174104	CD14	cg19008097	0	0	0	0	1	1	0	0	0	0	0	0	0	0	2	Unmarked
NM_003125	SPRR1B	cg24884084	0	1	0	0	1	0	0	0	0	0	0	0	0	0	2	Unmarked
NM_080833	RBBP8NL	cg02537838;cg03359095;cg06154311;cg13290149;cg17565967;cg17976205	1	0	0	0	0	0	0	0	0	0	0	0	0	1	2	Unmarked
NM_001166118	NT5C3A	cg05427639;cg06206957;cg26306289	1	0	0	0	0	0	0	0	0	0	0	0	0	1	2	Unmarked
NR_103736	LOC338797	cg02303068;cg14851701	1	0	0	0	0	0	0	0	0	0	0	0	0	1	2	Unmarked
NM_080675	SUN5	cg02510802	0	0	1	0	0	0	0	0	0	0	0	1	0	0	2	Unmarked
NR_034088	LINC00885	cg15932961	1	0	0	0	0	0	0	0	0	0	0	0	0	1	2	Unmarked
NM_001079874	VAV3	cg07243548	1	0	0	0	0	0	0	0	0	0	0	0	0	1	2	Unmarked
NM_178435	LCE3E	cg23110514;cg24000437	0	0	0	0	0	0	0	0	0	0	0	1	0	1	2	Unmarked
NM_001004475	OR10T2	cg15593510;cg15852352	1	0	0	0	0	0	1	0	0	0	0	0	0	0	2	Unmarked
NM_001005184	OR6K6	cg17025555	1	0	0	0	0	0	1	0	0	0	0	0	0	0	2	Unmarked
NM_138694	PKHD1	cg09871043	1	0	0	0	0	0	0	0	0	0	0	0	0	1	2	Unmarked
NM_017533	MYH4	cg08014964	0	0	0	1	0	0	0	0	0	0	0	0	0	1	2	Unmarked
NR_023359	CABLES1	cg00455327;cg00751332;cg19476622;cg20786131	1	0	0	0	0	0	0	0	0	0	0	0	0	1	2	K4-only
NM_001198532	OXR1	cg18444875	1	0	0	0	0	0	0	0	0	0	0	1	0	0	2	Unmarked
NM_001135844	SIRPB1	cg02198625;cg09577651;cg25799433	0	0	0	0	0	1	0	0	0	0	0	0	0	1	2	Unmarked
NM_152785	GCSAM	cg06510261;cg16006965;cg25462303	0	0	0	0	0	0	1	0	1	0	0	0	0	0	2	Unmarked
NM_001104548	MIR205HG	cg27333706	1	0	0	0	0	0	0	0	0	0	0	0	0	1	2	Unmarked
NM_001004739	OR5L2	cg02459415	1	0	0	0	0	0	0	0	0	0	0	0	0	1	2	Unmarked
NR_031745	MIR2053	cg08333835	0	0	1	0	0	0	0	0	0	0	0	1	0	0	2	Unmarked
NM_001199828	SPRR1A	cg04505023	0	0	0	0	0	0	1	0	0	0	0	0	0	1	2	Unmarked
NM_005988	SPRR2A	#N/A	0	0	0	0	0	0	1	0	0	0	0	1	0	0	2	Unmarked
NR_024564	LOC100130264	cg06738786	0	0	1	0	0	0	0	0	0	0	0	1	0	0	2	Unmarked
NR_026760	BPIFA4P	cg01923514;cg10637995;cg11274778;cg20539474;cg24866792	1	0	0	0	0	0	0	0	0	0	0	0	0	1	2	Unmarked
NM_001085455	KRTAP24-1	cg00458317;cg02131862;cg07172334;cg09892262	0	0	0	0	0	0	1	0	0	0	0	1	0	0	2	Unmarked
NM_005531	IFI16	cg07463059;cg17601658;cg20597486	0	0	0	0	1	1	0	0	0	0	0	0	0	0	2	Unmarked
NM_001242630	GFOD1	cg26942829	0	0	0	0	0	1	0	0	0	0	0	1	0	0	2	Unmarked
NR_030197	MIR526A1	cg19537184	0	0	0	0	0	0	0	0	1	0	0	0	0	1	2	Unmarked
NM_001004467	OR10J3	cg13507224;cg23774016	1	0	0	0	0	0	0	0	0	0	0	0	0	1	2	Unmarked
NM_018556	SIRPG	cg15722679	0	0	1	0	0	0	0	0	0	0	0	1	0	0	2	Unmarked
NM_001644	APOBEC1	cg11304383;cg17187764;cg20597842	1	0	0	0	0	0	0	0	0	0	0	0	0	1	2	Unmarked
NM_001220480	PPFIA2	cg20484417	0	0	1	0	0	0	0	0	0	0	0	1	0	0	2	Unmarked
NR_015391	TUSC7	cg09237790	1	0	0	0	1	0	0	0	0	0	0	0	0	0	2	Unmarked
NM_001130448	C15orf62	cg07306253;cg13065206;cg19095568;cg25700533;cg26705724	0	0	0	0	0	1	0	0	0	0	0	0	0	1	2	Unmarked
NR_046367	EGFL7	cg14143326	1	0	0	0	0	0	0	0	0	0	0	0	0	1	2	Unmarked
NM_178349	LCE1B	cg07090653	0	0	0	0	0	0	1	0	0	0	0	0	0	1	2	Unmarked
NM_003960	NAT8	cg19565262	0	0	0	0	1	1	0	0	0	0	0	0	0	0	2	Unmarked
NR_039979	LINC00967	cg23089445	0	0	1	0	0	0	0	0	0	0	0	1	0	0	2	Unmarked
NM_030766	BCL2L14	cg01175610;cg01934781;cg20481287	1	0	0	0	0	0	0	0	0	0	0	0	0	1	2	Unmarked
NM_002423	MMP7	cg17707274;cg25511807	0	0	1	0	0	0	0	0	0	0	0	1	0	0	2	Unmarked
NM_012351	OR10J1	cg15700197;cg19402335;cg25076881	1	0	0	0	0	0	0	0	0	0	0	0	0	1	2	Unmarked
NM_001195430	DCLK1	cg12206359;cg12942606;cg21092373;cg23814365	1	0	0	0	0	0	0	0	0	0	0	1	0	0	2	K4-only
NR_103501	LILRA1	cg15701210;cg25384595	0	0	0	0	0	0	1	0	0	0	0	0	0	1	2	Unmarked
NM_004054	C3AR1	cg04499514;cg09238677;cg27423177	0	0	1	1	0	0	0	0	0	0	0	0	0	0	2	Unmarked
NM_152439	BEST3	cg05493841;cg07911961;cg12596182;cg14834675	0	0	1	0	0	0	0	0	0	0	0	1	0	0	2	Unmarked
NM_033355	CASP8	cg05130485;cg25095814	1	0	0	0	0	0	0	0	0	0	0	0	0	1	2	K4-only
NM_001005270	OR4C12	cg15690511;cg15905666	1	0	0	0	0	0	0	0	0	0	0	1	0	0	2	Unmarked
NM_001159398	FCRL1	cg05766896;cg09340639	1	0	0	0	0	0	1	0	0	0	0	0	0	0	2	Unmarked
NR_024090	LINC00320	cg26977737	1	0	0	0	0	0	0	0	0	0	0	0	0	1	2	Unmarked
NM_145278	GCSAML	cg02052265;cg03343128;cg05767404;cg12769118;cg16555504;cg17518550;cg18908499;cg27573991	0	0	0	1	0	0	1	0	0	0	0	0	0	0	2	Unmarked
NM_001101337	C3orf79	cg00731062	0	0	0	0	0	0	0	0	0	0	0	1	0	1	2	Unmarked
NM_001004298	C10orf90	cg09621603;cg10005270;cg24143287	0	0	1	0	0	0	0	0	0	0	0	1	0	0	2	Unmarked
NM_138723	BCL2L14	cg01175610;cg01934781	1	0	0	0	0	0	0	0	0	0	0	0	0	1	2	Unmarked
NR_027042	MDS2	cg22613968	1	0	0	0	0	0	0	0	0	0	0	0	0	1	2	Unmarked
NM_207410	GFRAL	cg23978358	0	0	1	0	0	0	0	0	0	0	0	1	0	0	2	Unmarked
NM_153696	FOLH1B	cg02915544	0	0	1	0	0	0	0	0	0	0	0	1	0	0	2	Unmarked
NM_152426	APOBEC3D	cg16066354	0	0	0	0	0	1	0	0	0	1	0	0	0	0	2	Unmarked
NM_001126328	LNX1	cg01877606;cg02196651;cg06634862;cg11366178;cg11807829;cg12529273	1	0	0	0	0	0	0	0	0	0	0	0	0	1	2	K4-only
NR_039738	MIR4513	cg13578134	0	1	0	0	0	0	0	0	0	0	0	0	0	1	2	Unmarked
NM_001113398	ZNF385B	cg04868962	0	0	0	0	0	0	0	0	0	0	0	1	0	0	1	Unmarked
NM_012153	EHF	cg13084525;cg14022090;cg18414381	0	0	0	0	0	0	0	0	0	0	0	0	0	1	1	Unmarked
NM_153839	GPR111	cg16361253	0	0	0	0	0	0	0	0	0	0	0	1	0	0	1	Unmarked
NM_203494	USP50	cg01671642;cg03622314	0	0	0	0	0	0	0	0	0	0	0	0	0	1	1	Unmarked
NM_174897	BPIFB6	cg18223379;cg25345102	0	0	0	0	0	0	0	0	0	0	0	1	0	0	1	Unmarked
NM_145861	EDARADD	cg02632362;cg04031361;cg09809672;cg16240480	1	0	0	0	0	0	0	0	0	0	0	0	0	0	1	K27-only
NM_012252	TFEC	cg15339605	0	0	0	0	0	0	0	0	0	0	0	0	0	1	1	Unmarked
NM_001562	IL18	cg09122223;cg11304234;cg26534425	0	0	0	0	0	1	0	0	0	0	0	0	0	0	1	Unmarked
NM_000547	TPO	cg00040862;cg06500727;cg07083862;cg10370591;cg12680131;cg16016036	0	0	0	0	0	0	1	0	0	0	0	0	0	0	1	Unmarked
NM_032782	HAVCR2	cg15371617;cg17484237;cg19646897	0	0	0	0	1	0	0	0	0	0	0	0	0	0	1	Unmarked
NM_004662	DNAH9	cg12626882	1	0	0	0	0	0	0	0	0	0	0	0	0	0	1	Unmarked
NM_001080515	FAM163B	cg00055726;cg14584407	0	0	0	0	0	0	0	0	0	0	0	0	0	1	1	Unmarked
NM_001042685	LGALS9B	cg24387542	0	0	0	0	0	0	0	0	0	0	0	0	0	1	1	Unmarked
NM_001005174	OR52N2	cg03895540;cg05703009	0	0	0	0	0	0	0	0	0	0	0	1	0	0	1	Unmarked
NM_007253	CYP4F8	cg07512206;cg18680587	0	0	0	0	0	0	0	0	0	0	0	0	0	1	1	Unmarked
NR_029622	MIR205	cg03794445;cg12386297;cg15115728;cg17848546	0	0	0	0	0	0	0	0	1	0	0	0	0	0	1	Unmarked
NM_080548	PTPN6	cg04956511;cg07938459;cg12690127;cg15975802;cg23193870;cg23974819;cg25719851	0	0	0	0	0	0	0	0	0	0	0	0	0	1	1	K4-only
NM_178456	C20orf85	cg03387930;cg07655948;cg09663111;cg14508998;cg15310873;cg18562935;cg19155932;cg22991320;cg25906442	0	0	0	0	0	0	0	0	0	0	0	0	0	1	1	Unmarked
NM_053283	DCD	cg00868860;cg15016120;cg25372195	0	0	0	0	0	0	0	0	0	0	0	1	0	0	1	Unmarked
NM_181600	KRTAP13-4	cg14062083;cg24082983	1	0	0	0	0	0	0	0	0	0	0	0	0	0	1	Unmarked
NM_180990	ZACN	cg03882612;cg04568564;cg14651919;cg18010718;cg26545162	0	0	0	0	0	0	0	0	0	0	0	0	0	1	1	K27-only
NM_031415	GSDMC	cg05316065;cg26073844	1	0	0	0	0	0	0	0	0	0	0	0	0	0	1	Unmarked
NM_000407	GP1BB	cg02357751;cg03263514;cg07359545;cg14130977;cg16210718;cg16627786;cg23787873	0	0	0	0	0	0	0	0	0	0	0	0	0	1	1	K27-only
NM_016518	PIPOX	cg02463253;cg06144905;cg17751776;cg22968401	0	0	0	0	0	0	0	0	0	0	0	1	0	0	1	Unmarked
NR_028290	VNN3	cg14387743	0	0	0	0	0	0	0	0	0	0	0	1	0	0	1	Unmarked
NR_029682	MIR141	cg02624246;cg12161331;cg18185189;cg18959988;cg19794481;cg22413603;cg23067082	0	0	0	0	0	0	0	0	0	0	0	0	0	1	1	K4-only
NM_002333	LRP3	cg10276227	0	0	0	0	0	0	0	0	0	0	0	0	1	0	1	Bivalent
NM_182537	HTR3D	cg00576550;cg14483391	0	0	0	0	0	0	0	0	0	0	0	0	0	1	1	Unmarked
NM_001005238	OR51G2	cg02873384	0	0	0	0	0	0	1	0	0	0	0	0	0	0	1	Unmarked
NR_026684	HPYR1	cg05740582;cg09763347;cg10830322;cg24627900;cg25520146	0	0	0	0	0	0	1	0	0	0	0	0	0	0	1	Unmarked
NM_001010922	BCL2L15	cg12486521;cg13801402;cg13991834;cg24550026	0	0	0	0	0	0	0	0	0	0	0	0	0	1	1	Unmarked
NM_173538	CNBD1	cg00374101	0	0	0	0	0	0	1	0	0	0	0	0	0	0	1	Unmarked
NM_001251	CD68	cg05209483;cg15095917;cg18900669;cg21808406	0	0	0	0	1	0	0	0	0	0	0	0	0	0	1	Unmarked
NM_001174136	TDGF1	cg10365562	0	0	0	0	0	0	0	0	0	0	0	0	0	1	1	K4-only
NR_030204	MIR520D	cg22457503	0	0	0	0	0	0	0	0	0	0	0	1	0	0	1	Unmarked
NR_026679	LINC00032	cg02388718;cg24670241	0	0	0	0	0	0	0	0	0	0	0	1	0	0	1	Unmarked
NM_020805	KLHL14	cg01679516;cg06591973;cg13353999;cg13476901;cg14891195;cg16342115;cg20162206;cg21501358;cg27014538	0	0	0	0	0	0	0	0	0	0	0	0	0	1	1	Bivalent
NM_001206616	EHF	cg18560551	0	0	0	0	0	0	0	0	0	0	0	0	0	1	1	Unmarked
NM_001080440	OTOL1	cg01015123;cg13212525	0	0	0	1	0	0	0	0	0	0	0	0	0	0	1	Unmarked
NM_001764	CD1B	cg02478603;cg04574507	0	0	0	0	0	0	1	0	0	0	0	0	0	0	1	Unmarked
NM_033229	TRIM15	cg00720829;cg00879790;cg02772121;cg05701418;cg06051311;cg09848114;cg12232118;cg12422154;cg21856784;cg22425467;cg27583815	0	0	0	0	0	0	0	0	0	0	0	0	0	1	1	Unmarked
NR_026749	SKINTL	cg22848704	0	0	0	0	0	0	0	0	0	0	0	0	0	1	1	Unmarked
NM_000187	HGD	cg02841931;cg04546097;cg14527029	0	0	0	0	0	0	0	0	0	0	0	0	0	1	1	Unmarked
NM_030787	CFHR5	cg13682187	0	0	0	0	0	0	0	0	0	0	0	0	0	1	1	Unmarked
NM_002068	GNA15	cg01032675;cg03188495;cg07865607;cg10022788	0	0	0	0	0	0	0	0	0	0	0	0	0	1	1	Unmarked
NM_014395	DAPP1	cg06398236;cg10397389;cg14506696;cg21614638	1	0	0	0	0	0	0	0	0	0	0	0	0	0	1	Unmarked
NM_001001914	OR2G3	cg15231462;cg23924801	0	0	0	0	0	0	1	0	0	0	0	0	0	0	1	Unmarked
NM_053003	SIGLEC12	cg02381385;cg02695074;cg04336859;cg12530021;cg13981787;cg25969123;cg27086014	0	0	0	0	0	0	1	0	0	0	0	0	0	0	1	Unmarked
NM_002407	SCGB2A1	cg06334737;cg16986846;cg23206745	0	0	0	0	0	0	0	0	0	0	0	0	0	1	1	Unmarked
NM_001135864	METTL20	cg05343755	0	0	0	0	0	0	0	0	0	0	0	0	0	1	1	Unmarked
NM_001098213	HRH1	cg06457736;cg08831077;cg12179658;cg16929739;cg25677394;cg27092248	0	0	0	0	0	1	0	0	0	0	0	0	0	0	1	Unmarked
NM_031457	MS4A8	cg10891482;cg13633026;cg20446143	0	0	0	0	0	0	0	0	0	0	0	0	0	1	1	Unmarked
NM_181686	KRTAP12-1	#N/A	1	0	0	0	0	0	0	0	0	0	0	0	0	0	1	Unmarked
NM_020859	SHROOM3	cg05951609;cg19999035;cg20311846;cg27417997	0	0	0	0	0	0	0	0	0	0	0	0	0	1	1	K4-only
NM_001270383	ENKUR	cg18565795	0	0	0	0	0	0	0	0	0	0	0	1	0	0	1	Unmarked
NM_004833	AIM2	cg00490406;cg11003133;cg27541604	1	0	0	0	0	0	0	0	0	0	0	0	0	0	1	Unmarked
NM_206929	SYTL2	cg15731317	0	0	0	0	0	1	0	0	0	0	0	0	0	0	1	Unmarked
NM_001004756	OR51M1	cg27093637	0	0	0	0	0	0	0	0	0	0	0	0	0	1	1	Unmarked
NM_023076	UNKL	cg00454305;cg01682111;cg04603812;cg14850784	0	0	0	0	0	0	0	0	0	0	0	0	0	1	1	K4-only
NR_038291	LINC00707	cg16364066	1	0	0	0	0	0	0	0	0	0	0	0	0	0	1	Unmarked
NM_001004748	OR51A2	cg08106339;cg14511647	0	0	0	0	0	0	1	0	0	0	0	0	0	0	1	Unmarked
NM_019602	BTNL2	cg09748960;cg10254167;cg14096229	0	0	0	0	0	0	0	0	0	0	0	0	0	1	1	Unmarked
NM_001005185	OR6N1	cg04972930;cg24381587	0	0	0	0	0	0	1	0	0	0	0	0	0	0	1	Unmarked
NR_002171	OR7E156P	cg10059167	0	0	0	0	0	0	0	0	0	0	0	1	0	0	1	Unmarked
NM_003603	SORBS2	cg01933073;cg02790305;cg04348265;cg04392082;cg12066473;cg13921444;cg18566313;cg26785346	0	0	0	0	0	0	0	0	0	0	0	0	0	1	1	Unmarked
NM_001166695	SLC1A3	cg20646491;cg21970929	1	0	0	0	0	0	0	0	0	0	0	0	0	0	1	K4-only
NR_045962	KRT8	cg04799958;cg07652628;cg14212748	0	0	0	0	0	0	0	0	0	0	0	0	0	1	1	K4-only
NR_038844	LOC644838	cg06222012;cg15702677	0	0	0	0	0	0	0	0	0	0	0	0	0	1	1	Unmarked
NM_001005286	OR6F1	cg24460817	0	0	0	0	0	0	1	0	0	0	0	0	0	0	1	Unmarked
NR_030190	MIR526B	cg15003468	0	0	0	0	0	0	0	0	0	0	0	1	0	0	1	Unmarked
NM_001001913	OR52N1	cg10440696	0	0	0	0	0	0	0	0	0	0	0	1	0	0	1	Unmarked
NM_001004738	OR5L1	cg01515155	0	0	0	0	0	0	1	0	0	0	0	0	0	0	1	Unmarked
NM_206954	PRAME	cg01966129;cg04242655;cg05208878;cg07969622;cg08831999;cg11225751;cg17336139;cg20667684;cg22871485	0	0	0	0	0	0	0	0	0	0	0	0	0	1	1	Unmarked
NM_003167	SULT2A1	cg19139729;cg22472023;cg26574395	0	0	0	0	0	0	0	0	0	0	0	0	0	1	1	Unmarked
NR_026716	KIR3DX1	cg01449341;cg04244985;cg24119869	0	0	0	0	0	0	1	0	0	0	0	0	0	0	1	Unmarked
NM_001164183	ENTPD1	cg04451770;cg10381771;cg11637005;cg12497543;cg13471990	0	0	0	0	0	0	0	0	0	0	0	1	0	0	1	K4-only
NM_007267	TMC6	cg02911077;cg03742808;cg04947157;cg06643271;cg11493223;cg12798338;cg16214492;cg16301617;cg18901278;cg24988684	0	0	0	0	0	0	0	0	0	0	0	0	0	1	1	Bivalent
NM_014432	IL20RA	cg04481779;cg22487322;cg26864905	0	0	0	0	0	0	0	0	0	0	0	0	0	1	1	Bivalent
NM_001145153	TMEM71	cg03141298;cg05598678;cg10054641;cg20955688;cg23313885;cg27159719	0	0	0	0	0	0	1	0	0	0	0	0	0	0	1	Unmarked
NM_134431	SLCO1A2	cg14191244	0	0	0	0	0	0	0	0	1	0	0	0	0	0	1	K4-only
NM_052884	SIGLEC11	cg04784724	0	0	0	0	0	0	1	0	0	0	0	0	0	0	1	Unmarked
NM_001278614	UMOD	cg07456201	0	0	0	0	0	0	0	0	0	0	0	1	0	0	1	Unmarked
NM_003784	SERPINB7	cg17251713	0	0	0	0	0	0	1	0	0	0	0	0	0	0	1	Unmarked
NM_001040059	CD68	cg05209483;cg15095917;cg18900669;cg21808406	0	0	0	0	1	0	0	0	0	0	0	0	0	0	1	Unmarked
NR_039641	MIR4439	cg05363955	1	0	0	0	0	0	0	0	0	0	0	0	0	0	1	Unmarked
NM_001007525	NWD1	cg15845821;cg19344626;cg19784428;cg20249566;cg21035374	0	0	0	0	0	0	0	0	0	0	0	0	0	1	1	Unmarked
NM_001004452	OR1J4	cg24137660	0	0	0	0	0	0	0	0	0	0	0	1	0	0	1	Unmarked
NM_001725	BPI	cg02983911;cg03733207;cg26534847	0	0	0	1	0	0	0	0	0	0	0	0	0	0	1	Unmarked
NM_001005243	OR9K2	cg13860283	0	0	0	0	0	0	1	0	0	0	0	0	0	0	1	Unmarked
NR_036242	MIR4278	cg17298925	0	0	0	1	0	0	0	0	0	0	0	0	0	0	1	Unmarked
NM_001160417	ZBP1	cg07912689;cg17306740	0	0	0	0	0	0	0	0	0	0	0	0	0	1	1	Unmarked
NM_006417	IFI44	cg07107453	0	0	0	0	0	0	0	0	0	0	0	0	0	1	1	Unmarked
NM_001145262	NCOA4	cg00302587;cg01315067;cg20166027	0	0	0	0	0	0	0	0	0	0	0	0	0	1	1	Unmarked
NM_001165973	NRG3	cg25594165	0	0	0	0	1	0	0	0	0	0	0	0	0	0	1	Bivalent
NM_001153446	SCOC	cg05648303;cg16269196;cg19478223;cg21321372	0	0	0	0	0	0	0	0	0	0	0	0	0	1	1	Unmarked
NR_024373	MIR4435-1HG	#N/A	0	0	1	0	0	0	0	0	0	0	0	0	0	0	1	Unmarked
NM_033105	DNAJC5B	#N/A	0	0	0	0	0	0	0	0	0	0	0	0	0	1	1	Unmarked
NM_001145143	HTR3D	cg00576550;cg14483391	0	0	0	0	0	0	0	0	0	0	0	0	0	1	1	Unmarked
NM_001164178	ENTPD1	cg04451770;cg10381771;cg11637005;cg12497543;cg13471990	0	0	0	0	0	0	0	0	0	0	0	1	0	0	1	K4-only
NM_001765	CD1C	cg07548313;cg16993682;cg22610434	0	0	0	0	0	0	1	0	0	0	0	0	0	0	1	Unmarked
NM_001080399	OC90	cg20699323;cg21594839	0	0	0	0	0	0	0	0	0	0	0	1	0	0	1	Unmarked
NM_001005275	OR4A15	cg09807914;cg20084079	1	0	0	0	0	0	0	0	0	0	0	0	0	0	1	Unmarked
NM_000324	RHAG	cg23172892	0	0	0	0	0	0	0	0	0	0	0	1	0	0	1	Unmarked
NM_002298	LCP1	cg17771150	1	0	0	0	0	0	0	0	0	0	0	0	0	0	1	Unmarked
NM_001153690	SCOC	cg05648303;cg16269196;cg19478223;cg21321372	0	0	0	0	0	0	0	0	0	0	0	0	0	1	1	Unmarked
NM_001005467	OR8B3	cg24384051	0	0	0	0	0	0	0	0	0	0	0	0	0	1	1	Unmarked
NM_001007240	GP2	cg12554476;cg19238840	0	0	0	0	0	0	0	0	0	0	0	0	0	1	1	Unmarked
NM_170741	KCNJ16	cg02070290;cg26960719	0	0	0	0	0	0	0	0	0	0	0	0	0	1	1	Unmarked
NM_001785	CDA	cg04087271	1	0	0	0	0	0	0	0	0	0	0	0	0	0	1	Unmarked
NR_027426	LOC648691	cg00372774;cg01966129;cg04242655;cg05208878;cg07969622;cg08831999;cg11225751;cg16932094;cg17336139;cg20667684;cg22871485	0	0	0	0	0	0	0	0	0	0	0	0	0	1	1	Unmarked
NR_046851	ZNRF3-AS1	cg07127410	0	0	0	0	0	1	0	0	0	0	0	0	0	0	1	Unmarked
NM_002463	MX2	cg05656374;cg15281283;cg21130374	0	0	0	0	0	0	1	0	0	0	0	0	0	0	1	Unmarked
NM_012353	OR1C1	cg03773882;cg07159802;cg15147833;cg20305368	0	0	0	0	0	0	1	0	0	0	0	0	0	0	1	Unmarked
NM_001178097	C12orf74	cg04614923;cg12755471;cg25382573;cg26383838;cg27576271	0	0	0	0	0	0	0	0	0	0	0	0	0	1	1	Unmarked
NM_001754	RUNX1	cg01519261;cg04915566;cg08443845;cg13030790;cg15242225;cg19836199	0	0	0	1	0	0	0	0	0	0	0	0	0	0	1	Unmarked
NM_025048	GPR110	cg06228599;cg09556286;cg10896586	0	0	0	0	0	0	0	0	0	0	0	0	0	1	1	Unmarked
NR_030351	MIR620	cg18087803	0	0	0	0	0	0	0	0	0	0	0	0	0	1	1	Unmarked
NM_014357	LCE2B	cg21754343;cg24332770;cg25098401	0	0	0	0	0	0	1	0	0	0	0	0	0	0	1	Unmarked
NM_001080534	UNC13C	cg03281038;cg06530558;cg14159007	0	0	0	0	0	0	1	0	0	0	0	0	0	0	1	Unmarked
NM_022141	PARVG	cg04017276;cg07968613;cg11257728;cg15818715;cg19603134;cg19653345;cg19863740	0	0	0	0	0	0	0	0	0	0	0	0	0	1	1	Unmarked
NM_005584	MAB21L1	cg03014934;cg05093686;cg12029639;cg12178237;cg12573705;cg13446906;cg21884062;cg25628008	0	0	0	0	0	0	0	0	0	0	0	0	0	1	1	Bivalent
NM_014068	PSORS1C1	cg06136702	0	0	0	0	0	1	0	0	0	0	0	0	0	0	1	Unmarked
NM_198400	NEDD4	cg10433327	0	0	0	0	0	0	0	0	0	0	0	0	0	1	1	Unmarked
NM_002557	OVGP1	cg09558502;cg17798659	0	0	0	0	0	0	1	0	0	0	0	0	0	0	1	Unmarked
NM_007115	TNFAIP6	cg01942558;cg09727050	0	0	0	0	0	1	0	0	0	0	0	0	0	0	1	Unmarked
NM_001171992	C6orf223	cg16039071;cg19274606	0	0	0	0	0	0	0	0	0	0	0	0	0	1	1	Unmarked
NM_024320	PRR15L	cg03496533;cg09607679;cg15738800;cg18988110	0	0	0	0	0	0	0	0	0	0	0	0	0	1	1	Unmarked
NM_001001821	OR2T34	cg16233450	1	0	0	0	0	0	0	0	0	0	0	0	0	0	1	Unmarked
NM_001172813	SLC30A8	cg16309727	0	0	0	0	0	0	1	0	0	0	0	0	0	0	1	Unmarked
NR_028374	SNORA80B	cg11668917;cg15075241	0	0	0	0	0	0	0	0	0	0	0	1	0	0	1	K27-only
NM_001207016	PTPRR	cg25666210	1	0	0	0	0	0	0	0	0	0	0	0	0	0	1	Unmarked
NM_001177506	AOAH	cg14451276;cg18652683;cg25733272	0	0	0	0	0	0	0	0	1	0	0	0	0	0	1	Unmarked
NM_001242395	SYTL3	cg00370106;cg02829601;cg07265541;cg11065271;cg12691330;cg17768957	0	0	0	0	0	0	0	0	0	0	0	0	0	1	1	Unmarked
NR_002742	SNORD52	cg01657995;cg06438942	0	0	0	0	0	0	1	0	0	0	0	0	0	0	1	K4-only
NR_026719	DSCR9	cg01262913;cg11399508	0	0	0	0	0	0	0	0	0	0	0	0	0	1	1	Unmarked
NM_001195797	LY96	cg13213009;cg23732024	0	0	0	0	0	0	0	1	0	0	0	0	0	0	1	Unmarked
NM_021936	PAPPA2	cg10994126	0	0	0	0	0	0	0	0	0	0	0	1	0	0	1	Unmarked
NR_026704	VTRNA1-2	cg00500100;cg11807153;cg21161173;cg25984996	0	0	0	0	0	0	0	0	0	0	0	0	0	1	1	Unmarked
NM_001004730	OR5AR1	cg14029856	0	0	0	0	0	0	1	0	0	0	0	0	0	0	1	Unmarked
NM_001040078	LGALS9C	cg13597417	0	0	0	0	0	0	0	0	0	0	0	0	0	1	1	Unmarked
NM_000341	SLC3A1	cg02192965;cg03217954	0	0	0	0	0	0	0	0	0	0	0	0	0	1	1	Unmarked
NM_181776	SLC36A2	cg18723442;cg19562321	0	0	0	0	0	0	0	0	0	0	0	0	0	1	1	K27-only
NM_133326	ATP6V1G3	cg12958813;cg13100753	0	0	0	0	0	0	0	0	0	0	0	1	0	0	1	Unmarked
NR_033752	LOC344887	cg07091500	0	0	0	0	0	0	0	0	1	0	0	0	0	0	1	Unmarked
NM_001082618	CD33	cg10129493;cg11581627;cg24809544	0	0	0	0	0	0	1	0	0	0	0	0	0	0	1	Unmarked
NR_026945	LOC257358	cg04719574;cg22568403;cg26429629	0	0	0	0	1	0	0	0	0	0	0	0	0	0	1	Unmarked
NM_001001966	OR14A16	cg01755009;cg16027403;cg25977504	0	0	0	0	0	0	1	0	0	0	0	0	0	0	1	Unmarked
NM_001258312	PDE1A	cg05148373;cg08759112;cg09672358;cg09845785	0	0	0	0	0	0	1	0	0	0	0	0	0	0	1	Unmarked
NM_001168409	RIMS1	cg25737224	0	0	0	0	0	0	0	0	0	0	0	0	0	1	1	Unmarked
NM_001004476	OR10K2	cg01733284;cg26151206;cg27235829	0	0	0	0	0	0	1	0	0	0	0	0	0	0	1	Unmarked
NM_002852	PTX3	cg11299991	0	0	0	0	1	0	0	0	0	0	0	0	0	0	1	Bivalent
NM_021181	SLAMF7	cg04244970;cg07837085;cg11721194	1	0	0	0	0	0	0	0	0	0	0	0	0	0	1	Unmarked
NM_001257995	C13orf45	cg10645091;cg11747081;cg14251216;cg17481703;cg19050940;cg19496772;cg20806725	0	0	0	0	0	0	0	0	0	0	0	0	0	1	1	Unmarked
NM_006648	WNK2	cg10272601;cg16158807;cg20616414	0	0	0	0	0	0	0	0	0	0	0	0	1	0	1	Bivalent
NR_002601	FMO6P	cg06041466;cg25541621	0	0	0	0	0	0	0	0	0	0	0	0	0	1	1	Unmarked
NM_001146684	RNF222	cg00011924;cg10218000;cg12920094	0	0	0	0	0	0	0	0	0	0	0	0	0	1	1	Unmarked
NM_001243763	RABGAP1L	cg02482603;cg05702218	0	0	0	0	0	0	0	0	0	0	0	0	0	1	1	K4-only
NM_006399	BATF	cg09937039;cg14424070;cg15645309;cg21048162;cg21158815;cg21531300;cg22995449	0	1	0	0	0	0	0	0	0	0	0	0	0	0	1	Unmarked
NR_002714	REG1P	cg15359390;cg27226238	1	0	0	0	0	0	0	0	0	0	0	0	0	0	1	Unmarked
NM_001004064	OR8J3	cg25472174	0	0	0	0	0	0	0	0	0	0	0	1	0	0	1	Unmarked
NR_103776	CHRM3-AS2	cg18853490	0	0	0	0	0	0	0	0	0	0	0	0	0	1	1	Unmarked
NR_033878	LINC00944	cg04396850	0	0	0	1	0	0	0	0	0	0	0	0	0	0	1	Unmarked
NR_031573	MIR1283-1	cg09318158;cg26377653	0	0	0	0	0	0	0	0	1	0	0	0	0	0	1	Unmarked
NM_001005234	OR1L3	cg01693284;cg08970655	0	0	0	0	0	0	1	0	0	0	0	0	0	0	1	Unmarked
NM_001005325	OR6M1	cg00079598;cg25577367	0	0	0	0	0	0	0	0	0	0	0	0	0	1	1	Unmarked
NM_174927	SPATA19	cg16327839;cg18457737	0	0	0	0	0	0	0	0	0	0	0	0	0	1	1	Unmarked
NM_144590	ANKRD22	cg01561719;cg02538681;cg03249630;cg03818395;cg15945235	1	0	0	0	0	0	0	0	0	0	0	0	0	0	1	Unmarked
NM_015170	SULF1	cg00613562;cg02283643;cg04845579;cg05806180;cg07051728;cg07073960;cg12181083;cg15351186	0	0	0	0	0	0	0	0	0	0	0	1	0	0	1	K4-only
NM_001002915	IGFL2	cg10833393;cg20459022	0	0	0	0	0	0	0	0	0	0	0	1	0	0	1	Unmarked
NM_001178035	CEP85L	cg21308365;cg21771714	0	0	0	1	0	0	0	0	0	0	0	0	0	0	1	Unmarked
NM_001098612	SIGLEC14	cg03240663;cg08339192;cg25028162	0	0	0	0	0	0	1	0	0	0	0	0	0	0	1	Unmarked
NM_020393	PGLYRP4	cg02956542;cg03277515	0	0	0	0	0	0	0	0	0	0	0	0	0	1	1	Unmarked
NM_025107	MYCT1	#N/A	0	0	0	0	0	0	0	0	0	0	0	1	0	0	1	Unmarked
NM_001128210	SPRED2	cg01751245;cg08467103;cg09884146;cg26376241	0	1	0	0	0	0	0	0	0	0	0	0	0	0	1	Unmarked
NM_001099414	HAVCR1	cg07320595;cg11188031	0	0	0	0	0	1	0	0	0	0	0	0	0	0	1	Unmarked
NM_001258441	BLNK	cg07397033;cg08901339;cg16779976;cg25263238	0	0	0	0	0	0	0	0	0	0	0	0	0	1	1	Unmarked
NR_031751	MIR2117	cg01165909;cg03184776;cg25687874	1	0	0	0	0	0	0	0	0	0	0	0	0	0	1	Unmarked
NM_001017920	DAPL1	cg02251393;cg09357934;cg21992932;cg23560546	0	0	0	0	0	0	0	0	0	0	0	0	0	1	1	Unmarked
NM_003064	SLPI	cg07668993;cg08548498;cg14609407;cg23480341;cg23889010	0	0	0	0	0	0	0	0	0	0	0	0	0	1	1	Unmarked
NM_001010863	C10orf128	cg00142482;cg17887588;cg23499955	0	0	0	0	0	0	0	0	0	0	0	0	0	1	1	Unmarked
NM_002185	IL7R	cg04312209	0	0	0	0	0	0	0	0	0	0	0	1	0	0	1	Unmarked
NM_001005327	OR6K3	cg20268857	1	0	0	0	0	0	0	0	0	0	0	0	0	0	1	Unmarked
NR_002169	OR1F2P	cg03208902;cg07938480	0	0	0	1	0	0	0	0	0	0	0	0	0	0	1	Unmarked
NR_023847	PEG3-AS1	cg08155759;cg19212949;cg25401594	1	0	0	0	0	0	0	0	0	0	0	0	0	0	1	Unmarked
NR_033987	FLJ37505	cg02870011	0	0	0	0	0	0	1	0	0	0	0	0	0	0	1	Unmarked
NM_001244583	TFEC	cg00927226	0	0	0	0	0	0	0	0	0	0	0	1	0	0	1	Unmarked
NR_038257	TRPM2	cg06812844;cg08191854;cg14255426;cg17406359	1	0	0	0	0	0	0	0	0	0	0	0	0	0	1	Unmarked
NM_001004752	OR51F1	cg14119936	0	0	0	0	0	0	1	0	0	0	0	0	0	0	1	Unmarked
NM_006142	SFN	cg03421300;cg06720467;cg07786675;cg11348165;cg13374701;cg13466284;cg14333454;cg17330303;cg21950166	0	0	0	0	0	0	0	0	0	0	0	0	0	1	1	K27-only
NM_001251829	SPP1	cg00088885;cg15460348;cg20261167	0	0	0	0	0	0	0	0	0	0	0	0	0	1	1	Unmarked
NM_174918	C19orf59	cg01556075;cg03470073;cg07723365;cg12571879;cg17661462;cg18732541	0	0	0	0	0	0	0	0	0	0	0	0	0	1	1	Unmarked
NM_024022	TMPRSS3	cg01214847;cg18500968;cg25608949	0	0	0	0	0	0	0	0	0	0	0	0	0	1	1	Unmarked
NR_003715	LOC93432	cg04600092	0	0	0	0	0	0	0	0	0	0	0	0	0	1	1	Unmarked
NR_029689	MIR153-2	cg02223801;cg03361379;cg06555227;cg10310310;cg12779445;cg16477744;cg17527969	0	0	0	0	0	0	1	0	0	0	0	0	0	0	1	Unmarked
NM_145016	GLYATL2	cg18551877	0	0	0	0	0	0	0	0	0	0	0	0	0	1	1	Unmarked
NM_001014450	SPRR2F	cg22204954;cg22946974	0	0	0	0	0	0	1	0	0	0	0	0	0	0	1	Unmarked
NM_001242729	ARHGEF38	cg27126442	0	0	0	0	0	0	0	0	0	0	0	0	0	1	1	K27-only
NM_001008536	TCHHL1	cg08918985;cg10827479	0	0	0	0	0	0	1	0	0	0	0	0	0	0	1	Unmarked
NM_030572	C12orf39	cg02393721	0	0	0	0	0	0	0	0	0	0	0	0	0	1	1	K27-only
NM_001142685	ARHGAP32	cg06466839	1	0	0	0	0	0	0	0	0	0	0	0	0	0	1	Unmarked
NM_001170538	DZIP1L	cg00201025	0	0	0	0	0	0	0	0	0	0	0	0	0	1	1	Unmarked
NM_005306	FFAR2	cg03548857;cg15479752;cg18755094;cg20199836	0	0	0	0	0	0	0	0	0	0	0	0	0	1	1	Unmarked
NR_038406	STAU2-AS1	cg02346342;cg10322124;cg19846154;cg19901403	0	0	0	0	0	0	0	0	0	0	0	0	0	1	1	Unmarked
NM_152375	KLHDC7A	cg05040210;cg13507429;cg17156862;cg20200200	0	0	0	0	0	0	0	0	0	0	0	0	0	1	1	Unmarked
NM_133269	FCAR	cg05252264;cg22820233	0	0	0	0	0	0	1	0	0	0	0	0	0	0	1	Unmarked
NM_001017418	SPRR2B	cg08009265	0	0	0	0	0	0	1	0	0	0	0	0	0	0	1	Unmarked
NM_001115152	CD300LD	cg26886976	0	0	0	0	0	0	1	0	0	0	0	0	0	0	1	Unmarked
NR_102749	EGFLAM-AS2	cg12543918	0	0	0	0	0	0	0	0	0	0	0	1	0	0	1	Unmarked
NM_001042439	BPIFA3	cg01671881;cg09742177;cg15131258	0	0	0	0	0	0	0	0	0	0	0	1	0	0	1	Unmarked
NM_033035	TSLP	cg15739437;cg18049164	0	1	0	0	0	0	0	0	0	0	0	0	0	0	1	K27-only
NM_000634	CXCR1	cg18956547;cg20025658	1	0	0	0	0	0	0	0	0	0	0	0	0	0	1	Unmarked
NM_001099403	PRDM8	cg03463411;cg04235768;cg26299084	0	0	0	0	0	0	0	0	0	0	0	0	0	1	1	Bivalent
NM_001030019	SUN3	cg01388054;cg03609427;cg07298482;cg23509098	0	0	0	0	0	0	0	0	0	0	0	1	0	0	1	Unmarked
NM_005769	CHST4	cg00840403;cg00887153;cg05535113;cg16562730	0	0	0	0	0	0	0	0	1	0	0	0	0	0	1	K4-only
NR_038973	FAM170B-AS1	cg24385652	1	0	0	0	0	0	0	0	0	0	0	0	0	0	1	Unmarked
NM_001005201	OR8H3	cg09508275	1	0	0	0	0	0	0	0	0	0	0	0	0	0	1	Unmarked
NM_144577	CCDC114	cg13568258;cg22226527;cg23877608	0	0	0	0	1	0	0	0	0	0	0	0	0	0	1	Unmarked
NR_027358	LINC00592	cg09802818	0	0	0	0	0	1	0	0	0	0	0	0	0	0	1	Unmarked
NR_003230	SNORD113-2	cg04997124	0	0	0	0	0	0	0	0	0	0	0	0	0	1	1	Unmarked
NM_206955	PRAME	cg01966129;cg04242655;cg05208878;cg07969622;cg08831999;cg11225751;cg17336139;cg19804859;cg20667684;cg22871485	0	0	0	0	0	0	0	0	0	0	0	0	0	1	1	Unmarked
NM_001256822	44078	cg00934987;cg18396675	0	0	0	0	1	0	0	0	0	0	0	0	0	0	1	Unmarked
NM_000888	ITGB6	cg07896068;cg18437633	0	0	0	0	0	0	0	0	0	0	0	0	0	1	1	Unmarked
NM_001242696	C12orf80	cg09802818	0	0	0	0	0	1	0	0	0	0	0	0	0	0	1	Unmarked
NM_001193289	APOBEC3A_B	cg21345826;cg24360617;cg27504369	0	0	0	0	0	0	0	0	0	0	0	0	0	1	1	Unmarked
NM_022158	FN3K	cg03077331;cg17258265;cg21644856;cg21697134;cg22597040	0	0	0	0	0	0	0	0	0	0	0	0	1	0	1	K4-only
NM_013314	BLNK	cg07397033;cg08901339;cg16779976;cg25263238	0	0	0	0	0	0	0	0	0	0	0	0	0	1	1	Unmarked
NM_001253909	AKR1C3	cg12530994	0	0	0	0	0	0	0	0	0	0	1	0	0	0	1	Unmarked
NR_034091	LOC100129046	cg02978297;cg08237401	0	0	0	0	0	0	0	0	0	0	0	0	0	1	1	Unmarked
NM_002777	PRTN3	cg09134726;cg09930046;cg12230709;cg17004025;cg23386659;cg24304425	0	0	0	0	0	0	0	0	0	0	0	0	0	1	1	Unmarked
NR_026651	DGCR10	cg07167594	0	0	0	0	1	0	0	0	0	0	0	0	0	0	1	Unmarked
NR_002141	OR2M1P	cg01343097;cg18350545;cg18964985	0	0	0	0	0	0	1	0	0	0	0	0	0	0	1	Unmarked
NM_001162952	SYTL2	cg15731317	0	0	0	0	0	1	0	0	0	0	0	0	0	0	1	Unmarked
NR_038216	LOC154092	cg26379822	1	0	0	0	0	0	0	0	0	0	0	0	0	0	1	Unmarked
NM_001085481	MAP1LC3B2	cg03822198;cg06383241;cg11185549;cg12196045;cg12506165;cg12894524;cg18615133;cg19554257;cg23512558	0	0	0	0	0	0	0	0	1	0	0	0	0	0	1	Unmarked
NR_031744	MIR2052	cg26754262	0	0	0	0	0	0	0	0	0	0	0	1	0	0	1	Unmarked
NM_002030	FPR3	cg06784466	0	0	0	0	0	0	1	0	0	0	0	0	0	0	1	Unmarked
NM_009587	LGALS9	cg05105919;cg21157094;cg27625456	0	0	0	0	0	0	0	0	0	0	0	0	0	1	1	Unmarked
NM_001005495	OR2T3	cg12085619	1	0	0	0	0	0	0	0	0	0	0	0	0	0	1	Unmarked
NM_007072	HHLA2	cg02059214;cg10431989	0	0	0	0	0	1	0	0	0	0	0	0	0	0	1	Unmarked
NM_005218	DEFB1	cg02465761;cg24292612	0	0	0	0	0	0	0	0	0	0	0	0	0	1	1	Unmarked
NM_001097620	TMEM184A	cg00411097;cg09990600;cg10633906;cg12503394;cg21368161	1	0	0	0	0	0	0	0	0	0	0	0	0	0	1	Unmarked
NM_021186	ZP4	cg03872376;cg06888270;cg20185945;cg26810908	0	0	0	0	0	0	1	0	0	0	0	0	0	0	1	Unmarked
NM_033101	LGALS12	cg11183156;cg13439241;cg27376024	0	0	0	0	1	0	0	0	0	0	0	0	0	0	1	Unmarked
NM_153445	OR5P3	cg01469547;cg16226642	0	0	0	0	0	0	0	0	0	0	0	0	0	1	1	Unmarked
NM_005832	KCNMB2	cg23735602	0	0	0	0	0	0	0	0	0	0	0	0	0	1	1	Unmarked
NM_001024607	C7orf66	cg21462681	0	0	0	0	0	0	0	0	0	0	0	1	0	0	1	Unmarked
NM_001100122	SBNO2	cg02297063;cg02791973;cg03178838;cg09495643;cg12255995;cg16238993;cg23885932	0	0	0	0	0	0	0	0	0	1	0	0	0	0	1	K4-only
NR_026983	BTF3P11	cg01665118	0	0	0	0	0	0	0	0	0	0	0	1	0	0	1	Unmarked
NM_001206978	NR1H4	cg03771004;cg09244872;cg15381313;cg18874332;cg23256150	0	0	0	0	0	1	0	0	0	0	0	0	0	0	1	Unmarked
NM_153229	TMEM92	cg01734062;cg25949363	0	0	0	0	0	0	0	0	0	0	0	0	0	1	1	K4-only
NM_001184714	SLAMF6	cg10671066;cg21829783	0	0	0	0	0	0	0	0	0	0	0	0	0	1	1	Unmarked
NR_029779	MIR200C	cg00366413;cg02624246;cg12161331;cg18185189;cg18959988;cg19794481;cg22413603;cg23067082;cg27534624	0	0	0	0	0	0	0	0	0	0	0	0	0	1	1	K4-only
NM_025130	HKDC1	cg05532178;cg11639651;cg11762346;cg12682133;cg23341612	0	0	0	0	0	0	0	0	0	0	0	0	0	1	1	Unmarked
NR_045564	ASCC1	cg15013801;cg17372758;cg23685969	0	0	0	0	0	0	0	0	0	0	0	0	0	1	1	K4-only
NM_001243764	RABGAP1L	cg17516247	0	0	0	0	0	0	0	0	1	0	0	0	0	0	1	Unmarked
NR_003232	SNORD113-4	cg04784410;cg05218696	0	0	0	0	0	0	0	0	0	0	0	0	0	1	1	Unmarked
NM_001173551	TMPRSS4	cg05416223;cg05775918;cg22957898;cg25116503;cg27300950	0	0	0	0	0	0	0	0	0	0	0	0	0	1	1	Unmarked
NR_034119	LINC00460	cg02205193;cg05372727;cg13822911	0	0	0	0	0	0	0	0	0	0	0	1	0	0	1	Unmarked
NM_001277127	LRRC31	cg12183875	0	0	0	0	0	0	0	0	0	0	0	0	0	1	1	Unmarked
NM_006498	LGALS2	cg11081833;cg14711067;cg18072282;cg23835646;cg26651950	0	0	0	0	0	1	0	0	0	0	0	0	0	0	1	Unmarked
NM_001766	CD1D	cg24432768	1	0	0	0	0	0	0	0	0	0	0	0	0	0	1	K27-only
NM_007028	TRIM31	cg00679556;cg04012857;cg04151220	0	0	0	0	0	0	0	0	0	0	0	1	0	0	1	Unmarked
NR_002790	PER4	cg16465407	1	0	0	0	0	0	0	0	0	0	0	0	0	0	1	Unmarked
NM_006945	SPRR2D	cg01011918;cg14826683	0	0	0	0	0	0	1	0	0	0	0	0	0	0	1	Unmarked
NM_001114309	ELF3	cg02076020;cg05653018;cg07897871;cg16986578;cg18966401;cg26328757;cg26808687	0	0	0	0	0	0	0	0	0	0	0	0	0	1	1	K4-only
NM_005213	CSTA	cg14664412;cg18618429;cg21932814;cg26928972	1	0	0	0	0	0	0	0	0	0	0	0	0	0	1	Unmarked
NM_145699	APOBEC3A	cg21345826;cg24360617;cg27504369	0	0	0	0	0	0	0	0	0	0	0	0	0	1	1	Unmarked
NM_001205344	CEACAM1	cg11811510;cg14904363	0	0	0	0	0	0	0	0	0	0	0	0	0	1	1	Unmarked
NM_001100111	LOC286238	cg03578548	0	0	0	0	0	1	0	0	0	0	0	0	0	0	1	Unmarked
NM_130846	PTPRR	cg25666210	1	0	0	0	0	0	0	0	0	0	0	0	0	0	1	Unmarked
NM_001012993	C9orf152	cg09596614;cg14414873	0	0	0	0	0	0	0	0	0	0	0	0	0	1	1	Unmarked
NM_001168410	RIMS1	cg25737224	0	0	0	0	0	0	0	0	0	0	0	0	0	1	1	Unmarked
NM_001004688	OR2M2	cg00073384;cg20812354	0	0	0	0	0	0	1	0	0	0	0	0	0	0	1	Unmarked
NM_014058	TMPRSS11E	cg24792113	0	0	0	0	0	0	0	0	0	0	0	0	0	1	1	Unmarked
NR_033972	LOC440028	cg03354554;cg07734975	0	0	0	0	0	0	0	0	1	0	0	0	0	0	1	Unmarked
NM_001037730	DEFB115	cg02671750;cg09968709	1	0	0	0	0	0	0	0	0	0	0	0	0	0	1	Unmarked
NM_021777	ADAM28	cg14976447;cg17969683;cg18757155;cg22915945	0	0	0	0	0	0	0	0	0	0	0	0	0	1	1	Unmarked
NM_153325	DEFB125	cg01958189;cg08088390	0	0	0	0	0	0	0	0	0	0	0	1	0	0	1	Unmarked
NM_001004749	OR51A7	cg00467296;cg23295623;cg23520574	0	0	0	0	0	0	1	0	0	0	0	0	0	0	1	Unmarked
NM_182798	EGFLAM	cg12543918	0	0	0	0	0	0	0	0	0	0	0	1	0	0	1	Unmarked
NM_025055	CCDC33	cg02079584;cg02390801;cg04198210;cg07696006;cg19637113	0	0	0	0	0	0	0	0	0	0	0	0	0	1	1	Unmarked
NM_020707	HHATL	cg08776619	1	0	0	0	0	0	0	0	0	0	0	0	0	0	1	Unmarked
NM_198185	OVCH2	cg01229760;cg25499650	0	0	0	0	0	0	0	0	0	0	0	0	0	1	1	Unmarked
NM_001204197	NBEA	cg03014934;cg05093686;cg12029639;cg12178237;cg12573705;cg13446906;cg21884062;cg25628008	0	0	0	0	0	0	0	0	0	0	0	0	0	1	1	Bivalent

## Sheet: Fig 6A data
	No. of promoters with DNA methylation data and their chromatin state in human ESCs					No. of promoters hypermethylated in cancer and their chromatin state in human ESCs					Percentage of promoters hypermethylated in cancer and their chromatin state in human ESCs
Cancer-type	K4-only	Bivalent	K27-only	Unmarked	Total	K4-only	Bivalent	K27-only	Unmarked	Total	K4-only	Bivalent	K27-only	Unmarked	Expected
BLCA	12742	4194	462	6599	23997	37	75	6	13	131	0.290378	1.78827	1.2987	0.197	0.545902
BRCA	12725	4188	459	6410	23782	49	65	11	34	159	0.385069	1.55205	2.39651	0.530421	0.668573
COAD	12737	4191	463	6651	24042	142	431	10	6	589	1.11486	10.2839	2.15983	0.090212	2.44988
HNSC	12733	4194	461	6586	23974	66	124	20	11	221	0.518338	2.9566	4.33839	0.167021	0.921832
KIRC	12746	4195	463	6661	24065	6	1	0	3	10	0.0470736	0.0238379	0	0.0450383	0.0415541
KIRP	12740	4196	461	6674	24071	7	2	3	8	20	0.0549451	0.0476644	0.650759	0.119868	0.0830875
LIHC	12732	4190	460	6510	23892	19	19	3	4	45	0.14923	0.453461	0.652174	0.0614439	0.188348
LUAD	12731	4191	459	6589	23970	15	39	11	7	72	0.117823	0.930565	2.39651	0.106238	0.300375
LUSC	12742	4194	463	6615	24014	38	39	26	29	132	0.298226	0.9299	5.61555	0.438398	0.549679
PAAD	12730	4189	461	6508	23888	4	13	0	8	25	0.0314218	0.310337	0	0.122926	0.104655
PRAD	12743	4193	461	6621	24018	107	75	7	38	227	0.839677	1.7887	1.51844	0.573931	0.945124
READ	12741	4196	463	6681	24081	106	301	7	7	421	0.83196	7.1735	1.51188	0.104775	1.74827
STAD	12735	4191	461	6548	23935	23	34	1	6	64	0.180605	0.811262	0.21692	0.091631	0.267391
UCEC	12741	4190	461	6632	24024	123	196	22	80	421	0.965387	4.6778	4.77223	1.20627	1.75241

## Sheet: Fig 6B data
	No. of promoters with DNA methylation data and their chromatin state in human ESCs					No. of promoters hypomethylated in cancer and their chromatin state in human ESCs					Percentage of promoters hypomethylated in cancer and their chromatin state in human ESCs
Cancer-type	K4-only	Bivalent	K27-only	Unmarked	Total	K4-only	Bivalent	K27-only	Unmarked	Total	K4-only	Bivalent	K27-only	Unmarked	Expected
BLCA	12742	4194	462	6599	23997	9	0	2	98	109	0.0706326	0	0.4329	1.48507	0.454223
BRCA	12725	4188	459	6410	23782	2	0	1	4	7	0.0157171	0	0.217865	0.0624025	0.029434
COAD	12737	4191	463	6651	24042	2	0	0	45	47	0.0157023	0	0	0.67659	0.195491
HNSC	12733	4194	461	6586	23974	1	0	0	20	21	0.00785361	0	0	0.303674	0.0875949
KIRC	12746	4195	463	6661	24065	3	2	0	22	27	0.0235368	0.0476758	0	0.330281	0.112196
KIRP	12740	4196	461	6674	24071	1	0	0	32	33	0.00784929	0	0	0.479473	0.137094
LIHC	12732	4190	460	6510	23892	2	0	0	87	89	0.0157085	0	0	1.33641	0.37251
LUAD	12731	4191	459	6589	23970	1	0	0	1	2	0.00785484	0	0	0.0151768	0.00834376
LUSC	12742	4194	463	6615	24014	4	0	0	16	20	0.0313922	0	0	0.241875	0.0832848
PAAD	12730	4189	461	6508	23888	1	0	0	1	2	0.00785546	0	0	0.0153657	0.0083724
PRAD	12743	4193	461	6621	24018	0	0	0	2	2	0	0	0	0.0302069	0.00832709
READ	12741	4196	463	6681	24081	7	0	1	101	109	0.0549407	0	0.215983	1.51175	0.452639
STAD	12735	4191	461	6548	23935	1	2	0	2	5	0.00785238	0.0477213	0	0.0305437	0.0208899
UCEC	12741	4190	461	6632	24024	18	6	6	168	198	0.141276	0.143198	1.30152	2.53317	0.824176
