# Supplementary material for: Decoding the function of bivalent chromatin in development and cancer
Source: HighWire-hosted journal article supplement (doi:10.1101/gr.275736.121), 2021-10-19
Supplement: Supplemental_Table_S9.xlsx [file Supplemental_Table_S9.xlsx]

## Sheet: Promoter_Chromatin_States
Supplemental Table 9A. Chromatin states of human gene promoters in various cell types
RefSeq Accession	Gene Symbol	Gene Coordinates (hg19)				Chromatin State
						ESCs (H1)	ESCs (HUES64)	Brain Germinal Matrix	Penis Foreskin 01 Fibroblast	Penis Foreskin 02 Fibroblast	HSCs	Fetal Small Intestine	Fetal Large Intestine	Embryonic Kidney (NHEKs)	Foreskin Melanocyte	Blood (PBMCs)	Mammary Epithelial Cells (HMECs)	Breast Myoepithelial Cells	Lung Fibroblasts (NHLFs)	HUVECs	Pancreatic Islets	Esophagus	Heart (Left Ventricle)	Gastric	Pancreas
		Chr	Start	End	Strand
NM_000014	A2M	chr12	9220303	9268558	-	Unmarked	Unmarked	Unmarked	Unmarked	Unmarked	Unmarked	H3K4me3-only	H3K4me3-only	Unmarked	H3K4me3-only	Unmarked	Unmarked	H3K4me3-only	H3K4me3-only	Unmarked	H3K4me3-only	Unmarked	H3K4me3-only	Unmarked	Unmarked
NM_000015	NAT2	chr8	18248754	18258723	+	Unmarked	Unmarked	Unmarked	Unmarked	Unmarked	Unmarked	H3K4me3-only	H3K4me3-only	Unmarked	Unmarked	Unmarked	Unmarked	Unmarked	Unmarked	Unmarked	Unmarked	Unmarked	Unmarked	Unmarked	Unmarked
NM_000017	ACADS	chr12	121163570	121177811	+	H3K4me3-only	H3K4me3-only	H3K4me3-only	H3K4me3-only	H3K4me3-only	H3K4me3-only	H3K4me3-only	H3K4me3-only	H3K4me3-only	H3K4me3-only	H3K4me3-only	H3K4me3-only	H3K4me3-only	H3K4me3-only	H3K4me3-only	H3K4me3-only	H3K4me3-only	H3K4me3-only	H3K4me3-only	H3K4me3-only
NM_000019	ACAT1	chr11	107992257	108018891	+	Bivalent	Bivalent	H3K4me3-only	H3K4me3-only	H3K4me3-only	H3K4me3-only	H3K4me3-only	H3K4me3-only	H3K4me3-only	H3K4me3-only	H3K4me3-only	H3K4me3-only	H3K4me3-only	H3K4me3-only	H3K4me3-only	H3K4me3-only	H3K4me3-only	H3K4me3-only	H3K4me3-only	H3K4me3-only
NM_000020	ACVRL1	chr12	52301201	52317145	+	Bivalent	Bivalent	Bivalent	Bivalent	H3K4me3-only	Bivalent	Bivalent	H3K4me3-only	Bivalent	H3K4me3-only	H3K27me3-only	H3K27me3-only	H3K4me3-only	H3K4me3-only	H3K4me3-only	H3K4me3-only	H3K4me3-only	H3K4me3-only	Unmarked	H3K4me3-only
NM_000021	PSEN1	chr14	73603142	73690399	+	H3K4me3-only	H3K4me3-only	H3K4me3-only	H3K4me3-only	H3K4me3-only	H3K4me3-only	H3K4me3-only	H3K4me3-only	H3K4me3-only	H3K4me3-only	H3K4me3-only	H3K4me3-only	H3K4me3-only	H3K4me3-only	H3K4me3-only	H3K4me3-only	H3K4me3-only	H3K4me3-only	H3K4me3-only	H3K4me3-only
NM_000022	ADA	chr20	43248162	43280376	-	Bivalent	Bivalent	Bivalent	Bivalent	Bivalent	H3K4me3-only	Bivalent	H3K4me3-only	H3K4me3-only	H3K4me3-only	H3K4me3-only	H3K4me3-only	H3K4me3-only	H3K4me3-only	H3K4me3-only	H3K4me3-only	H3K4me3-only	H3K4me3-only	H3K4me3-only	H3K4me3-only
NM_000024	ADRB2	chr5	148206155	148208197	+	Bivalent	Bivalent	H3K4me3-only	H3K4me3-only	H3K4me3-only	H3K4me3-only	Bivalent	Bivalent	H3K4me3-only	H3K4me3-only	H3K4me3-only	H3K4me3-only	H3K4me3-only	H3K4me3-only	H3K4me3-only	H3K4me3-only	H3K4me3-only	H3K4me3-only	H3K4me3-only	H3K4me3-only
NM_000025	ADRB3	chr8	37820513	37824184	-	Bivalent	Bivalent	H3K27me3-only	Bivalent	H3K27me3-only	H3K27me3-only	Bivalent	Bivalent	H3K27me3-only	Bivalent	H3K27me3-only	H3K27me3-only	H3K27me3-only	H3K27me3-only	H3K27me3-only	Unmarked	Unmarked	Unmarked	Unmarked	Unmarked
NM_000029	AGT	chr1	230838271	230850336	-	Unmarked	Unmarked	Unmarked	H3K4me3-only	H3K4me3-only	Unmarked	H3K4me3-only	H3K4me3-only	Unmarked	Unmarked	Unmarked	Unmarked	Unmarked	Unmarked	Unmarked	Unmarked	Unmarked	Unmarked	Unmarked	Unmarked
NM_000030	AGXT	chr2	241808161	241818536	+	Unmarked	Unmarked	H3K27me3-only	H3K27me3-only	H3K27me3-only	Unmarked	Unmarked	Unmarked	Unmarked	H3K27me3-only	Unmarked	H3K27me3-only	Unmarked	H3K27me3-only	Unmarked	Unmarked	Unmarked	Unmarked	Unmarked	Unmarked
NM_000031	ALAD	chr9	116148591	116163618	-	H3K4me3-only	H3K4me3-only	H3K4me3-only	H3K4me3-only	H3K4me3-only	H3K4me3-only	H3K4me3-only	H3K4me3-only	H3K4me3-only	H3K4me3-only	H3K4me3-only	H3K4me3-only	H3K4me3-only	H3K4me3-only	H3K4me3-only	H3K4me3-only	H3K4me3-only	H3K4me3-only	H3K4me3-only	H3K4me3-only
NM_000032	ALAS2	chrX	55035487	55057497	-	Unmarked	Unmarked	Unmarked	Unmarked	Unmarked	Unmarked	Unmarked	Unmarked	Unmarked	Unmarked	Unmarked	H3K27me3-only	Unmarked	Unmarked	Unmarked	Unmarked	Unmarked	Unmarked	Unmarked	Unmarked
NM_000033	ABCD1	chrX	152990322	153010216	+	H3K4me3-only	H3K4me3-only	H3K4me3-only	H3K4me3-only	H3K4me3-only	H3K4me3-only	H3K4me3-only	H3K4me3-only	H3K4me3-only	H3K4me3-only	H3K4me3-only	H3K4me3-only	Bivalent	H3K4me3-only	Unmarked	H3K4me3-only	H3K4me3-only	H3K4me3-only	H3K4me3-only	H3K4me3-only
NM_000034	ALDOA	chr16	30064410	30081741	+	H3K4me3-only	H3K4me3-only	H3K4me3-only	H3K4me3-only	H3K4me3-only	H3K4me3-only	H3K4me3-only	H3K4me3-only	H3K4me3-only	H3K4me3-only	H3K4me3-only	H3K4me3-only	H3K4me3-only	H3K4me3-only	H3K4me3-only	H3K4me3-only	H3K4me3-only	H3K4me3-only	H3K4me3-only	H3K4me3-only
NM_000035	ALDOB	chr9	104182841	104198062	-	Unmarked	Unmarked	Unmarked	Unmarked	Unmarked	Unmarked	Unmarked	Unmarked	Unmarked	Unmarked	Unmarked	Unmarked	Unmarked	Unmarked	Unmarked	Unmarked	Unmarked	Unmarked	Unmarked	Unmarked
NM_000038	APC	chr5	112073555	112181936	+	H3K4me3-only	H3K4me3-only	Bivalent	H3K4me3-only	H3K4me3-only	H3K4me3-only	H3K4me3-only	H3K4me3-only	H3K4me3-only	H3K4me3-only	H3K4me3-only	H3K4me3-only	H3K4me3-only	H3K4me3-only	H3K4me3-only	H3K4me3-only	H3K4me3-only	H3K4me3-only	H3K4me3-only	H3K4me3-only
NM_000039	APOA1	chr11	116706468	116708338	-	Unmarked	Unmarked	Unmarked	Unmarked	Unmarked	Unmarked	H3K4me3-only	H3K4me3-only	Unmarked	Unmarked	Unmarked	Unmarked	Unmarked	Unmarked	Unmarked	Unmarked	Unmarked	Unmarked	Unmarked	Unmarked
NM_000040	APOC3	chr11	116700623	116703787	+	Unmarked	Unmarked	Unmarked	H3K27me3-only	H3K27me3-only	Unmarked	H3K4me3-only	H3K4me3-only	H3K27me3-only	Unmarked	Unmarked	Unmarked	Unmarked	Unmarked	Unmarked	Unmarked	Unmarked	Unmarked	Unmarked	Unmarked
NM_000041	APOE	chr19	45409038	45412650	+	H3K4me3-only	H3K4me3-only	Bivalent	Bivalent	Bivalent	Bivalent	H3K4me3-only	H3K4me3-only	Bivalent	H3K4me3-only	H3K27me3-only	H3K4me3-only	H3K4me3-only	Bivalent	Unmarked	Unmarked	H3K4me3-only	Unmarked	Unmarked	Unmarked
NM_000042	APOH	chr17	64208146	64225556	-	Unmarked	Unmarked	Unmarked	Unmarked	Unmarked	Unmarked	Unmarked	Unmarked	Unmarked	Unmarked	Unmarked	Unmarked	Unmarked	Unmarked	Unmarked	Unmarked	Unmarked	Unmarked	Unmarked	Unmarked
NM_000043	FAS	chr10	90750287	90775542	+	Bivalent	Bivalent	Bivalent	H3K4me3-only	H3K4me3-only	H3K4me3-only	H3K4me3-only	H3K4me3-only	H3K4me3-only	H3K4me3-only	H3K4me3-only	H3K4me3-only	H3K4me3-only	H3K4me3-only	H3K4me3-only	H3K4me3-only	H3K4me3-only	H3K4me3-only	H3K4me3-only	H3K4me3-only
NM_000044	AR	chrX	66763873	66950461	+	Bivalent	Bivalent	H3K4me3-only	H3K4me3-only	H3K4me3-only	Bivalent	Bivalent	H3K27me3-only	Bivalent	Bivalent	H3K27me3-only	Bivalent	H3K4me3-only	H3K4me3-only	H3K4me3-only	H3K4me3-only	H3K4me3-only	H3K4me3-only	H3K4me3-only	H3K4me3-only
NM_000046	ARSB	chr5	78073036	78282357	-	Unmarked	Unmarked	Unmarked	Unmarked	Unmarked	H3K4me3-only	Unmarked	Unmarked	Unmarked	Unmarked	Unmarked	Unmarked	Unmarked	Unmarked	Unmarked	H3K4me3-only	Unmarked	Unmarked	Unmarked	Unmarked
NM_000047	ARSE	chrX	2852672	2882494	-	Unmarked	Unmarked	Unmarked	Unmarked	Unmarked	Unmarked	H3K4me3-only	H3K4me3-only	Unmarked	Unmarked	Unmarked	Unmarked	Unmarked	Unmarked	Unmarked	Unmarked	Unmarked	Unmarked	Unmarked	H3K4me3-only
NM_000048	ASL	chr7	65540775	65558329	+	H3K4me3-only	H3K4me3-only	H3K4me3-only	H3K4me3-only	H3K4me3-only	H3K4me3-only	H3K4me3-only	H3K4me3-only	H3K4me3-only	H3K4me3-only	H3K4me3-only	H3K4me3-only	H3K4me3-only	H3K4me3-only	H3K4me3-only	H3K4me3-only	H3K4me3-only	H3K4me3-only	H3K4me3-only	H3K4me3-only
NM_000049	ASPA	chr17	3379295	3402700	+	Unmarked	Unmarked	Unmarked	Unmarked	Unmarked	H3K4me3-only	Unmarked	H3K4me3-only	H3K4me3-only	H3K4me3-only	Unmarked	H3K4me3-only	H3K4me3-only	H3K4me3-only	Unmarked	H3K4me3-only	Unmarked	Unmarked	Unmarked	Unmarked
NM_000050	ASS1	chr9	133320093	133376661	+	Bivalent	Bivalent	Bivalent	Bivalent	Bivalent	Bivalent	H3K4me3-only	H3K4me3-only	Bivalent	Bivalent	Bivalent	H3K4me3-only	H3K4me3-only	Bivalent	Unmarked	H3K4me3-only	H3K4me3-only	H3K4me3-only	H3K4me3-only	H3K4me3-only
NM_000051	ATM	chr11	108093558	108239826	+	H3K4me3-only	H3K4me3-only	H3K4me3-only	H3K4me3-only	H3K4me3-only	H3K4me3-only	H3K4me3-only	H3K4me3-only	H3K4me3-only	H3K4me3-only	H3K4me3-only	H3K4me3-only	H3K4me3-only	H3K4me3-only	H3K4me3-only	H3K4me3-only	H3K4me3-only	H3K4me3-only	H3K4me3-only	H3K4me3-only
NM_000052	ATP7A	chrX	77166193	77305892	+	H3K4me3-only	H3K4me3-only	H3K4me3-only	H3K4me3-only	H3K4me3-only	H3K4me3-only	H3K4me3-only	H3K4me3-only	H3K4me3-only	H3K4me3-only	H3K4me3-only	H3K4me3-only	H3K4me3-only	H3K4me3-only	H3K4me3-only	H3K4me3-only	H3K4me3-only	H3K4me3-only	H3K4me3-only	H3K4me3-only
NM_000055	BCHE	chr3	165490691	165555253	-	Unmarked	H3K4me3-only	H3K4me3-only	Unmarked	Unmarked	Unmarked	H3K4me3-only	H3K4me3-only	H3K4me3-only	H3K4me3-only	Unmarked	Unmarked	Unmarked	H3K4me3-only	Unmarked	H3K4me3-only	H3K4me3-only	Unmarked	Unmarked	Unmarked
NM_000056	BCKDHB	chr6	80816343	81055987	+	H3K4me3-only	H3K4me3-only	H3K4me3-only	H3K4me3-only	H3K4me3-only	H3K4me3-only	H3K4me3-only	H3K4me3-only	H3K4me3-only	H3K4me3-only	H3K4me3-only	H3K4me3-only	H3K4me3-only	H3K4me3-only	H3K4me3-only	H3K4me3-only	H3K4me3-only	H3K4me3-only	H3K4me3-only	H3K4me3-only
NM_000057	BLM	chr15	91260578	91358686	+	H3K4me3-only	H3K4me3-only	H3K4me3-only	H3K4me3-only	H3K4me3-only	H3K4me3-only	H3K4me3-only	H3K4me3-only	H3K4me3-only	H3K4me3-only	H3K4me3-only	H3K4me3-only	H3K4me3-only	H3K4me3-only	H3K4me3-only	H3K4me3-only	H3K4me3-only	H3K4me3-only	H3K4me3-only	H3K4me3-only
NM_000059	BRCA2	chr13	32889616	32973809	+	H3K4me3-only	H3K4me3-only	H3K4me3-only	H3K4me3-only	H3K4me3-only	H3K4me3-only	H3K4me3-only	H3K4me3-only	H3K4me3-only	H3K4me3-only	H3K4me3-only	H3K4me3-only	H3K4me3-only	H3K4me3-only	H3K4me3-only	H3K4me3-only	H3K4me3-only	H3K4me3-only	H3K4me3-only	H3K4me3-only
NM_000060	BTD	chr3	15643254	15687325	+	H3K4me3-only	H3K4me3-only	H3K4me3-only	H3K4me3-only	H3K4me3-only	H3K4me3-only	H3K4me3-only	H3K4me3-only	H3K4me3-only	H3K4me3-only	H3K4me3-only	H3K4me3-only	H3K4me3-only	H3K4me3-only	H3K4me3-only	H3K4me3-only	H3K4me3-only	H3K4me3-only	H3K4me3-only	H3K4me3-only
NM_000061	BTK	chrX	100604434	100641212	-	Unmarked	Unmarked	Unmarked	H3K27me3-only	Unmarked	H3K4me3-only	Unmarked	Unmarked	Unmarked	Unmarked	H3K4me3-only	Unmarked	H3K27me3-only	Unmarked	Unmarked	Unmarked	Unmarked	Unmarked	Unmarked	Unmarked
NM_000062	SERPING1	chr11	57365026	57382326	+	H3K4me3-only	H3K4me3-only	H3K4me3-only	H3K4me3-only	Bivalent	H3K4me3-only	Bivalent	Bivalent	Unmarked	H3K4me3-only	Unmarked	Unmarked	H3K4me3-only	H3K4me3-only	H3K27me3-only	H3K4me3-only	H3K4me3-only	H3K4me3-only	Unmarked	H3K4me3-only
NM_000063	C2	chr6	31895265	31913449	+	Unmarked	Unmarked	H3K27me3-only	H3K27me3-only	Unmarked	Unmarked	H3K4me3-only	H3K4me3-only	Unmarked	Unmarked	Unmarked	Unmarked	Unmarked	Unmarked	Unmarked	Unmarked	Unmarked	Unmarked	Unmarked	Unmarked
NM_000064	C3	chr19	6677845	6720662	-	Unmarked	Unmarked	H3K27me3-only	H3K27me3-only	Unmarked	Unmarked	Unmarked	Unmarked	Unmarked	H3K27me3-only	Unmarked	Unmarked	Unmarked	Unmarked	Unmarked	Unmarked	Unmarked	Unmarked	Unmarked	H3K4me3-only
NM_000065	C6	chr5	41142247	41213695	-	Unmarked	Unmarked	Unmarked	Unmarked	Unmarked	Unmarked	Unmarked	H3K4me3-only	Unmarked	Unmarked	Unmarked	Unmarked	Unmarked	Unmarked	Unmarked	H3K4me3-only	Unmarked	Unmarked	Unmarked	Unmarked
NM_000067	CA2	chr8	86376130	86393721	+	Bivalent	Bivalent	Bivalent	Bivalent	Bivalent	H3K4me3-only	H3K4me3-only	H3K4me3-only	H3K4me3-only	Bivalent	H3K4me3-only	H3K4me3-only	H3K4me3-only	Bivalent	H3K27me3-only	H3K4me3-only	H3K4me3-only	H3K4me3-only	H3K4me3-only	H3K4me3-only
NM_000069	CACNA1S	chr1	201008639	201081694	-	Unmarked	Unmarked	Unmarked	H3K27me3-only	H3K27me3-only	H3K27me3-only	Unmarked	Unmarked	H3K27me3-only	H3K27me3-only	Unmarked	Unmarked	H3K27me3-only	H3K27me3-only	Unmarked	Unmarked	Unmarked	Unmarked	Unmarked	Unmarked
NM_000071	CBS	chr21	44473300	44496040	-	H3K4me3-only	H3K4me3-only	Bivalent	H3K4me3-only	H3K4me3-only	Bivalent	Bivalent	Bivalent	Bivalent	H3K4me3-only	Bivalent	Bivalent	Bivalent	Bivalent	H3K4me3-only	H3K4me3-only	H3K4me3-only	H3K4me3-only	H3K4me3-only	H3K4me3-only
NM_000073	CD3G	chr11	118215058	118224497	+	Unmarked	Unmarked	H3K27me3-only	Unmarked	Unmarked	Unmarked	Unmarked	Unmarked	Unmarked	H3K27me3-only	H3K4me3-only	Unmarked	Unmarked	Unmarked	Unmarked	Unmarked	H3K4me3-only	Unmarked	Unmarked	Unmarked
NM_000074	CD40LG	chrX	135730335	135742549	+	Unmarked	Unmarked	Unmarked	Unmarked	Unmarked	Unmarked	Unmarked	Unmarked	Unmarked	Unmarked	H3K4me3-only	Unmarked	Unmarked	Unmarked	Unmarked	Unmarked	Unmarked	Unmarked	Unmarked	Unmarked
NM_000075	CDK4	chr12	58141509	58146230	-	H3K4me3-only	H3K4me3-only	H3K4me3-only	H3K4me3-only	H3K4me3-only	H3K4me3-only	H3K4me3-only	H3K4me3-only	H3K4me3-only	H3K4me3-only	H3K4me3-only	H3K4me3-only	H3K4me3-only	H3K4me3-only	H3K4me3-only	H3K4me3-only	H3K4me3-only	H3K4me3-only	H3K4me3-only	H3K4me3-only
NM_000077	CDKN2A	chr9	21967750	21975132	-	Bivalent	Bivalent	Bivalent	Bivalent	H3K4me3-only	Bivalent	Bivalent	Bivalent	Bivalent	Bivalent	Bivalent	Unmarked	Bivalent	Bivalent	Bivalent	H3K4me3-only	H3K4me3-only	H3K4me3-only	H3K4me3-only	H3K4me3-only
NM_000078	CETP	chr16	56995834	57017756	+	Unmarked	Unmarked	Unmarked	H3K27me3-only	H3K4me3-only	Unmarked	Unmarked	Unmarked	Unmarked	Unmarked	Unmarked	Unmarked	Unmarked	Unmarked	Unmarked	Unmarked	Unmarked	Unmarked	Unmarked	Unmarked
NM_000080	CHRNE	chr17	4801063	4806369	-	Unmarked	Unmarked	H3K27me3-only	Bivalent	H3K4me3-only	Unmarked	H3K27me3-only	H3K27me3-only	H3K4me3-only	Unmarked	Unmarked	Unmarked	Unmarked	Unmarked	Unmarked	Unmarked	Unmarked	Unmarked	Unmarked	Unmarked
NM_000081	LYST	chr1	235824330	236030227	-	H3K4me3-only	Bivalent	H3K4me3-only	H3K4me3-only	H3K4me3-only	H3K4me3-only	H3K4me3-only	H3K4me3-only	H3K4me3-only	H3K4me3-only	H3K4me3-only	H3K4me3-only	H3K4me3-only	H3K4me3-only	H3K4me3-only	H3K4me3-only	H3K4me3-only	H3K4me3-only	H3K4me3-only	H3K4me3-only
NM_000082	ERCC8	chr5	60169658	60240905	-	H3K4me3-only	H3K4me3-only	H3K4me3-only	H3K4me3-only	H3K4me3-only	H3K4me3-only	H3K4me3-only	H3K4me3-only	H3K4me3-only	H3K4me3-only	H3K4me3-only	H3K4me3-only	H3K4me3-only	H3K4me3-only	H3K4me3-only	H3K4me3-only	H3K4me3-only	H3K4me3-only	H3K4me3-only	H3K4me3-only
NM_000083	CLCN1	chr7	143013218	143049097	+	Unmarked	Unmarked	Unmarked	Unmarked	Unmarked	Unmarked	Unmarked	Unmarked	Unmarked	Unmarked	Unmarked	Unmarked	Unmarked	Unmarked	Unmarked	Unmarked	Unmarked	Unmarked	Unmarked	Unmarked
NM_000084	CLCN5	chrX	49832214	49863892	+	H3K4me3-only	H3K4me3-only	H3K4me3-only	Unmarked	Unmarked	Unmarked	H3K4me3-only	H3K4me3-only	Unmarked	Unmarked	Unmarked	Unmarked	H3K27me3-only	Unmarked	Unmarked	Unmarked	Unmarked	Unmarked	Unmarked	Unmarked
NM_000085	CLCNKB	chr1	16370230	16383821	+	Unmarked	Unmarked	H3K27me3-only	H3K27me3-only	H3K27me3-only	Unmarked	Unmarked	Unmarked	H3K27me3-only	H3K27me3-only	Unmarked	H3K27me3-only	Unmarked	H3K27me3-only	Unmarked	Unmarked	Unmarked	Unmarked	Unmarked	Unmarked
NM_000086	CLN3	chr16	28488599	28503403	-	H3K4me3-only	H3K4me3-only	Bivalent	H3K4me3-only	H3K4me3-only	H3K4me3-only	H3K4me3-only	H3K4me3-only	H3K4me3-only	H3K4me3-only	H3K4me3-only	H3K4me3-only	H3K4me3-only	H3K4me3-only	H3K4me3-only	H3K4me3-only	H3K4me3-only	H3K4me3-only	H3K4me3-only	H3K4me3-only
NM_000087	CNGA1	chr4	47937993	48014961	-	Unmarked	Unmarked	Unmarked	Unmarked	Unmarked	Unmarked	Unmarked	Unmarked	Unmarked	Unmarked	Unmarked	Unmarked	Unmarked	Unmarked	Unmarked	Unmarked	Unmarked	Unmarked	Unmarked	Unmarked
NM_000088	COL1A1	chr17	48261456	48279000	-	Bivalent	Bivalent	H3K27me3-only	Bivalent	H3K4me3-only	Bivalent	Bivalent	Bivalent	Bivalent	Bivalent	H3K27me3-only	Unmarked	H3K4me3-only	H3K4me3-only	H3K27me3-only	Unmarked	H3K4me3-only	H3K4me3-only	Unmarked	H3K4me3-only
NM_000089	COL1A2	chr7	94023872	94060544	+	H3K4me3-only	H3K4me3-only	H3K4me3-only	H3K4me3-only	H3K4me3-only	Bivalent	Bivalent	Bivalent	Bivalent	H3K4me3-only	H3K27me3-only	H3K4me3-only	H3K4me3-only	H3K4me3-only	H3K4me3-only	Unmarked	H3K4me3-only	H3K4me3-only	Unmarked	Unmarked
NM_000090	COL3A1	chr2	189839098	189877472	+	Unmarked	Unmarked	Unmarked	H3K4me3-only	H3K4me3-only	Unmarked	H3K4me3-only	H3K4me3-only	Unmarked	Unmarked	Unmarked	Unmarked	Unmarked	H3K4me3-only	Unmarked	Unmarked	H3K4me3-only	H3K4me3-only	Unmarked	Unmarked
NM_000091	COL4A3	chr2	228029280	228179508	+	Bivalent	Bivalent	Bivalent	Bivalent	Bivalent	Bivalent	Bivalent	Bivalent	Bivalent	Bivalent	Bivalent	Bivalent	H3K4me3-only	Bivalent	H3K27me3-only	H3K4me3-only	H3K4me3-only	H3K4me3-only	H3K4me3-only	H3K4me3-only
NM_000092	COL4A4	chr2	227867426	228029275	-	Bivalent	Bivalent	Bivalent	Bivalent	Bivalent	Bivalent	Bivalent	Bivalent	Bivalent	Bivalent	Bivalent	Bivalent	H3K4me3-only	Bivalent	H3K27me3-only	H3K4me3-only	H3K4me3-only	H3K4me3-only	H3K4me3-only	H3K4me3-only
NM_000093	COL5A1	chr9	137533650	137736688	+	Bivalent	Bivalent	Bivalent	H3K4me3-only	H3K4me3-only	H3K4me3-only	Bivalent	Bivalent	Bivalent	Bivalent	Bivalent	Bivalent	H3K4me3-only	H3K4me3-only	H3K4me3-only	H3K4me3-only	H3K4me3-only	H3K4me3-only	H3K4me3-only	H3K4me3-only
NM_000094	COL7A1	chr3	48601505	48632593	-	H3K4me3-only	H3K4me3-only	Bivalent	H3K4me3-only	H3K4me3-only	Bivalent	Bivalent	H3K4me3-only	H3K4me3-only	H3K4me3-only	H3K27me3-only	H3K4me3-only	H3K4me3-only	H3K4me3-only	Unmarked	Unmarked	H3K4me3-only	Unmarked	Unmarked	Unmarked
NM_000095	COMP	chr19	18893582	18902114	-	H3K27me3-only	Bivalent	H3K27me3-only	Bivalent	Bivalent	Bivalent	H3K27me3-only	H3K27me3-only	H3K27me3-only	H3K27me3-only	H3K27me3-only	H3K27me3-only	H3K27me3-only	H3K27me3-only	H3K27me3-only	Unmarked	H3K4me3-only	Unmarked	Unmarked	Unmarked
NM_000097	CPOX	chr3	98298289	98312455	-	H3K4me3-only	H3K4me3-only	H3K4me3-only	H3K4me3-only	H3K4me3-only	H3K4me3-only	H3K4me3-only	H3K4me3-only	H3K4me3-only	H3K4me3-only	H3K4me3-only	H3K4me3-only	H3K4me3-only	H3K4me3-only	H3K4me3-only	H3K4me3-only	H3K4me3-only	H3K4me3-only	H3K4me3-only	H3K4me3-only
NM_000098	CPT2	chr1	53662100	53679869	+	H3K4me3-only	H3K4me3-only	H3K4me3-only	H3K4me3-only	H3K4me3-only	H3K4me3-only	H3K4me3-only	H3K4me3-only	H3K4me3-only	H3K4me3-only	H3K4me3-only	H3K4me3-only	H3K4me3-only	H3K4me3-only	H3K4me3-only	H3K4me3-only	H3K4me3-only	H3K4me3-only	H3K4me3-only	H3K4me3-only
NM_000099	CST3	chr20	23614293	23618574	-	H3K4me3-only	Bivalent	H3K4me3-only	H3K4me3-only	H3K4me3-only	H3K4me3-only	H3K4me3-only	H3K4me3-only	H3K4me3-only	H3K4me3-only	Bivalent	H3K4me3-only	H3K4me3-only	H3K4me3-only	H3K4me3-only	H3K4me3-only	H3K4me3-only	H3K4me3-only	H3K4me3-only	H3K4me3-only
NM_000100	CSTB	chr21	45193545	45196256	-	H3K4me3-only	H3K4me3-only	Bivalent	H3K4me3-only	H3K4me3-only	H3K4me3-only	H3K4me3-only	H3K4me3-only	H3K4me3-only	H3K4me3-only	H3K4me3-only	H3K4me3-only	H3K4me3-only	H3K4me3-only	H3K4me3-only	H3K4me3-only	H3K4me3-only	H3K4me3-only	H3K4me3-only	H3K4me3-only
NM_000101	CYBA	chr16	88709696	88717492	-	H3K4me3-only	H3K4me3-only	H3K4me3-only	H3K4me3-only	H3K4me3-only	H3K4me3-only	H3K4me3-only	H3K4me3-only	H3K4me3-only	H3K4me3-only	H3K4me3-only	Unmarked	H3K4me3-only	H3K4me3-only	H3K4me3-only	H3K4me3-only	H3K4me3-only	H3K4me3-only	H3K4me3-only	H3K4me3-only
NM_000102	CYP17A1	chr10	104590287	104597290	-	Unmarked	Unmarked	Unmarked	H3K27me3-only	H3K27me3-only	Unmarked	Unmarked	Unmarked	Unmarked	Unmarked	Unmarked	Unmarked	H3K27me3-only	H3K27me3-only	Unmarked	Unmarked	Unmarked	Unmarked	Unmarked	Unmarked
NM_000103	CYP19A1	chr15	51500253	51630795	-	Unmarked	H3K27me3-only	Unmarked	H3K27me3-only	H3K27me3-only	Unmarked	Unmarked	Unmarked	Unmarked	H3K27me3-only	Unmarked	Unmarked	Unmarked	H3K27me3-only	H3K27me3-only	Unmarked	Unmarked	Unmarked	Unmarked	Unmarked
NM_000104	CYP1B1	chr2	38294745	38303323	-	Bivalent	Bivalent	Bivalent	Bivalent	Bivalent	Bivalent	Bivalent	Bivalent	Bivalent	Bivalent	Bivalent	Bivalent	H3K4me3-only	Bivalent	Bivalent	H3K4me3-only	H3K4me3-only	H3K4me3-only	H3K4me3-only	H3K4me3-only
NM_000107	DDB2	chr11	47236492	47260769	+	H3K4me3-only	H3K4me3-only	H3K4me3-only	H3K4me3-only	H3K4me3-only	H3K4me3-only	H3K4me3-only	H3K4me3-only	H3K4me3-only	H3K4me3-only	H3K4me3-only	H3K4me3-only	H3K4me3-only	H3K4me3-only	H3K4me3-only	H3K4me3-only	H3K4me3-only	H3K4me3-only	H3K4me3-only	H3K4me3-only
NM_000108	DLD	chr7	107531585	107561643	+	H3K4me3-only	H3K4me3-only	H3K4me3-only	H3K4me3-only	H3K4me3-only	H3K4me3-only	H3K4me3-only	H3K4me3-only	H3K4me3-only	H3K4me3-only	H3K4me3-only	H3K4me3-only	H3K4me3-only	H3K4me3-only	H3K4me3-only	H3K4me3-only	H3K4me3-only	H3K4me3-only	H3K4me3-only	H3K4me3-only
NM_000109	DMD	chrX	31137344	33357726	-	Unmarked	Unmarked	H3K4me3-only	Unmarked	Unmarked	Unmarked	Unmarked	H3K4me3-only	Unmarked	Unmarked	Unmarked	H3K4me3-only	H3K4me3-only	H3K4me3-only	Unmarked	H3K4me3-only	Unmarked	Unmarked	Unmarked	Unmarked
NM_000111	SLC26A3	chr7	107405911	107443678	-	Unmarked	Unmarked	Unmarked	Unmarked	Unmarked	Unmarked	H3K4me3-only	H3K4me3-only	Unmarked	Unmarked	Unmarked	Unmarked	Unmarked	H3K27me3-only	H3K27me3-only	Unmarked	Unmarked	Unmarked	Unmarked	Unmarked
NM_000112	SLC26A2	chr5	149340299	149366963	+	H3K4me3-only	H3K4me3-only	H3K4me3-only	H3K4me3-only	H3K4me3-only	H3K4me3-only	H3K4me3-only	H3K4me3-only	H3K4me3-only	H3K4me3-only	H3K4me3-only	H3K4me3-only	H3K4me3-only	H3K4me3-only	H3K4me3-only	H3K4me3-only	H3K4me3-only	H3K4me3-only	H3K4me3-only	H3K4me3-only
NM_000113	TOR1A	chr9	132575220	132586441	-	H3K4me3-only	H3K4me3-only	H3K4me3-only	H3K4me3-only	H3K4me3-only	H3K4me3-only	H3K4me3-only	H3K4me3-only	H3K4me3-only	H3K4me3-only	H3K4me3-only	H3K4me3-only	H3K4me3-only	H3K4me3-only	H3K4me3-only	H3K4me3-only	H3K4me3-only	H3K4me3-only	H3K4me3-only	H3K4me3-only
NM_000115	EDNRB	chr13	78469615	78549664	-	Unmarked	Unmarked	Unmarked	Unmarked	Unmarked	Unmarked	Unmarked	Unmarked	Unmarked	Unmarked	Unmarked	Unmarked	Unmarked	Unmarked	Unmarked	Unmarked	Unmarked	Unmarked	Unmarked	Unmarked
NM_000116	TAZ	chrX	153639876	153650063	+	H3K4me3-only	H3K4me3-only	H3K4me3-only	H3K4me3-only	H3K4me3-only	H3K4me3-only	H3K4me3-only	H3K4me3-only	H3K4me3-only	H3K4me3-only	H3K4me3-only	H3K4me3-only	Bivalent	H3K4me3-only	H3K4me3-only	H3K4me3-only	H3K4me3-only	H3K4me3-only	H3K4me3-only	H3K4me3-only
NM_000117	EMD	chrX	153607596	153609883	+	H3K4me3-only	H3K4me3-only	H3K4me3-only	H3K4me3-only	H3K4me3-only	H3K4me3-only	H3K4me3-only	H3K4me3-only	H3K4me3-only	H3K4me3-only	H3K4me3-only	H3K4me3-only	H3K4me3-only	H3K4me3-only	H3K4me3-only	H3K4me3-only	H3K4me3-only	H3K4me3-only	H3K4me3-only	H3K4me3-only
NM_000118	ENG	chr9	130577290	130617052	-	Unmarked	Unmarked	H3K4me3-only	H3K4me3-only	H3K4me3-only	H3K4me3-only	H3K4me3-only	H3K4me3-only	Unmarked	H3K4me3-only	H3K4me3-only	H3K4me3-only	H3K4me3-only	H3K4me3-only	H3K4me3-only	H3K4me3-only	H3K4me3-only	H3K4me3-only	H3K4me3-only	H3K4me3-only
NM_000119	EPB42	chr15	43489425	43513323	-	Unmarked	Unmarked	Unmarked	H3K27me3-only	H3K27me3-only	Unmarked	Unmarked	Unmarked	Unmarked	Unmarked	Unmarked	Unmarked	Unmarked	H3K27me3-only	Unmarked	Unmarked	Unmarked	Unmarked	Unmarked	Unmarked
NM_000120	EPHX1	chr1	226013001	226033262	+	Unmarked	Unmarked	Unmarked	H3K27me3-only	Unmarked	Unmarked	Unmarked	Unmarked	Unmarked	Unmarked	Unmarked	Unmarked	Unmarked	Unmarked	Unmarked	Unmarked	Unmarked	Unmarked	Unmarked	Unmarked
NM_000121	EPOR	chr19	11487880	11495018	-	H3K4me3-only	H3K4me3-only	H3K27me3-only	Bivalent	Bivalent	H3K4me3-only	H3K4me3-only	Bivalent	H3K27me3-only	H3K4me3-only	Unmarked	Unmarked	H3K4me3-only	H3K4me3-only	H3K4me3-only	H3K4me3-only	Unmarked	H3K4me3-only	Unmarked	H3K4me3-only
NM_000122	ERCC3	chr2	128014865	128051752	-	H3K4me3-only	H3K4me3-only	H3K4me3-only	H3K4me3-only	H3K4me3-only	H3K4me3-only	H3K4me3-only	H3K4me3-only	H3K4me3-only	H3K4me3-only	H3K4me3-only	H3K4me3-only	H3K4me3-only	H3K4me3-only	H3K4me3-only	H3K4me3-only	H3K4me3-only	H3K4me3-only	H3K4me3-only	H3K4me3-only
NM_000123	ERCC5	chr13	103498190	103528351	+	H3K4me3-only	H3K4me3-only	H3K4me3-only	H3K4me3-only	H3K4me3-only	H3K4me3-only	H3K4me3-only	H3K4me3-only	H3K4me3-only	H3K4me3-only	H3K4me3-only	H3K4me3-only	H3K4me3-only	H3K4me3-only	H3K4me3-only	H3K4me3-only	H3K4me3-only	H3K4me3-only	H3K4me3-only	H3K4me3-only
NM_000124	ERCC6	chr10	50662525	50747169	-	H3K4me3-only	Bivalent	Bivalent	H3K4me3-only	H3K4me3-only	H3K4me3-only	H3K4me3-only	H3K4me3-only	H3K4me3-only	H3K4me3-only	H3K4me3-only	H3K4me3-only	H3K4me3-only	H3K4me3-only	H3K4me3-only	H3K4me3-only	H3K4me3-only	H3K4me3-only	H3K4me3-only	H3K4me3-only
NM_000125	ESR1	chr6	152128813	152424408	+	Bivalent	Bivalent	Bivalent	H3K4me3-only	Bivalent	Bivalent	H3K27me3-only	H3K27me3-only	Bivalent	Bivalent	Bivalent	Bivalent	Bivalent	H3K27me3-only	H3K27me3-only	H3K4me3-only	H3K4me3-only	H3K4me3-only	Unmarked	H3K4me3-only
NM_000126	ETFA	chr15	76508628	76603810	-	H3K4me3-only	H3K4me3-only	H3K4me3-only	H3K4me3-only	H3K4me3-only	H3K4me3-only	H3K4me3-only	H3K4me3-only	H3K4me3-only	H3K4me3-only	H3K4me3-only	H3K4me3-only	H3K4me3-only	H3K4me3-only	H3K4me3-only	H3K4me3-only	H3K4me3-only	H3K4me3-only	H3K4me3-only	H3K4me3-only
NM_000127	EXT1	chr8	118811601	119124058	-	Bivalent	H3K4me3-only	H3K4me3-only	H3K4me3-only	H3K4me3-only	Bivalent	H3K4me3-only	H3K4me3-only	H3K4me3-only	H3K4me3-only	H3K4me3-only	H3K4me3-only	H3K4me3-only	H3K4me3-only	H3K4me3-only	H3K4me3-only	H3K4me3-only	H3K4me3-only	H3K4me3-only	H3K4me3-only
NM_000128	F11	chr4	187187117	187210835	+	Unmarked	H3K4me3-only	Unmarked	Unmarked	Unmarked	Unmarked	Unmarked	Unmarked	Unmarked	Unmarked	Unmarked	Unmarked	Unmarked	Unmarked	Unmarked	H3K4me3-only	Unmarked	Unmarked	Unmarked	Unmarked
NM_000129	F13A1	chr6	6144310	6320924	-	Bivalent	Bivalent	H3K27me3-only	H3K27me3-only	Unmarked	Bivalent	H3K27me3-only	H3K27me3-only	H3K27me3-only	H3K27me3-only	H3K4me3-only	H3K27me3-only	H3K27me3-only	Unmarked	Unmarked	H3K4me3-only	H3K4me3-only	Unmarked	Unmarked	H3K4me3-only
NM_000130	F5	chr1	169481191	169555769	-	Unmarked	Unmarked	Unmarked	H3K4me3-only	H3K4me3-only	H3K4me3-only	H3K27me3-only	H3K27me3-only	Unmarked	Unmarked	H3K4me3-only	Unmarked	Unmarked	Unmarked	Unmarked	Unmarked	H3K4me3-only	Unmarked	Unmarked	Unmarked
NM_000131	F7	chr13	113760101	113774995	+	Unmarked	Unmarked	Unmarked	H3K27me3-only	H3K27me3-only	H3K27me3-only	H3K4me3-only	H3K4me3-only	H3K27me3-only	Unmarked	Unmarked	Unmarked	H3K27me3-only	Unmarked	Unmarked	Unmarked	Unmarked	Unmarked	Unmarked	Unmarked
NM_000132	F8	chrX	154064063	154250998	-	Unmarked	Unmarked	Unmarked	Unmarked	Unmarked	Unmarked	Unmarked	Unmarked	Unmarked	Unmarked	Unmarked	Unmarked	Unmarked	Unmarked	Unmarked	Unmarked	Unmarked	H3K4me3-only	Unmarked	Unmarked
NM_000133	F9	chrX	138612894	138645617	+	Unmarked	Unmarked	Unmarked	Unmarked	Unmarked	Unmarked	Unmarked	Unmarked	Unmarked	Unmarked	Unmarked	Unmarked	Unmarked	Unmarked	Unmarked	Unmarked	Unmarked	Unmarked	Unmarked	Unmarked
NM_000134	FABP2	chr4	120238404	120243316	-	Unmarked	Unmarked	Unmarked	Unmarked	Unmarked	Unmarked	H3K4me3-only	H3K4me3-only	Unmarked	Unmarked	Unmarked	Unmarked	Unmarked	Unmarked	Unmarked	Unmarked	Unmarked	Unmarked	Unmarked	Unmarked
NM_000136	FANCC	chr9	97861335	98079991	-	H3K4me3-only	H3K4me3-only	H3K4me3-only	H3K4me3-only	H3K4me3-only	H3K4me3-only	H3K4me3-only	H3K4me3-only	H3K4me3-only	H3K4me3-only	H3K4me3-only	H3K4me3-only	H3K4me3-only	H3K4me3-only	H3K4me3-only	H3K4me3-only	H3K4me3-only	H3K4me3-only	H3K4me3-only	H3K4me3-only
NM_000137	FAH	chr15	80445232	80478924	+	H3K4me3-only	H3K4me3-only	H3K4me3-only	H3K4me3-only	H3K4me3-only	H3K4me3-only	H3K4me3-only	H3K4me3-only	H3K4me3-only	H3K4me3-only	H3K4me3-only	H3K4me3-only	H3K4me3-only	H3K4me3-only	H3K4me3-only	H3K4me3-only	H3K4me3-only	H3K4me3-only	H3K4me3-only	H3K4me3-only
NM_000138	FBN1	chr15	48700502	48937985	-	Bivalent	Bivalent	Bivalent	H3K4me3-only	H3K4me3-only	H3K4me3-only	Bivalent	Bivalent	H3K4me3-only	H3K4me3-only	Bivalent	H3K4me3-only	H3K4me3-only	H3K4me3-only	H3K4me3-only	H3K4me3-only	H3K4me3-only	H3K4me3-only	H3K4me3-only	H3K4me3-only
NM_000140	FECH	chr18	55212072	55253969	-	H3K4me3-only	H3K4me3-only	H3K4me3-only	H3K4me3-only	H3K4me3-only	H3K4me3-only	H3K4me3-only	H3K4me3-only	H3K4me3-only	H3K4me3-only	H3K4me3-only	H3K4me3-only	H3K4me3-only	H3K4me3-only	H3K4me3-only	H3K4me3-only	H3K4me3-only	H3K4me3-only	H3K4me3-only	H3K4me3-only
NM_000142	FGFR3	chr4	1795038	1810599	+	Bivalent	Bivalent	Bivalent	Bivalent	Bivalent	Bivalent	H3K4me3-only	Bivalent	Bivalent	Bivalent	Bivalent	Bivalent	H3K4me3-only	Bivalent	H3K27me3-only	H3K4me3-only	H3K4me3-only	H3K4me3-only	H3K4me3-only	H3K4me3-only
NM_000143	FH	chr1	241660856	241683085	-	H3K4me3-only	H3K4me3-only	H3K4me3-only	H3K4me3-only	H3K4me3-only	H3K4me3-only	H3K4me3-only	H3K4me3-only	H3K4me3-only	H3K4me3-only	H3K4me3-only	H3K4me3-only	H3K4me3-only	H3K4me3-only	H3K4me3-only	H3K4me3-only	H3K4me3-only	H3K4me3-only	H3K4me3-only	H3K4me3-only
NM_000145	FSHR	chr2	49189295	49381666	-	Unmarked	Unmarked	Unmarked	Unmarked	Unmarked	Unmarked	Unmarked	Unmarked	Unmarked	Unmarked	Unmarked	Unmarked	Unmarked	Unmarked	Unmarked	Unmarked	Unmarked	Unmarked	Unmarked	Unmarked
NM_000146	FTL	chr19	49468565	49470136	+	H3K4me3-only	H3K4me3-only	Bivalent	H3K4me3-only	H3K4me3-only	H3K4me3-only	H3K4me3-only	H3K4me3-only	H3K4me3-only	H3K4me3-only	H3K4me3-only	H3K4me3-only	H3K4me3-only	H3K4me3-only	H3K4me3-only	H3K4me3-only	H3K4me3-only	H3K4me3-only	H3K4me3-only	H3K4me3-only
NM_000147	FUCA1	chr1	24171571	24194859	-	Bivalent	Bivalent	Bivalent	Bivalent	Bivalent	H3K4me3-only	H3K4me3-only	H3K4me3-only	H3K4me3-only	H3K4me3-only	H3K4me3-only	H3K4me3-only	H3K4me3-only	Bivalent	H3K4me3-only	H3K4me3-only	H3K4me3-only	H3K4me3-only	H3K4me3-only	H3K4me3-only
NM_000148	FUT1	chr19	49251267	49258647	-	Unmarked	Unmarked	H3K27me3-only	H3K27me3-only	H3K27me3-only	H3K27me3-only	H3K27me3-only	H3K27me3-only	H3K4me3-only	Unmarked	Unmarked	Unmarked	Unmarked	Unmarked	Unmarked	Unmarked	Unmarked	Unmarked	Unmarked	Unmarked
NM_000149	FUT3	chr19	5842898	5851485	-	Unmarked	Unmarked	Unmarked	Unmarked	H3K27me3-only	Unmarked	Unmarked	Unmarked	H3K4me3-only	Unmarked	Unmarked	Unmarked	Unmarked	Unmarked	Unmarked	Unmarked	H3K4me3-only	Unmarked	Unmarked	Unmarked
NM_000150	FUT6	chr19	5830636	5839742	-	Unmarked	Unmarked	Unmarked	H3K27me3-only	H3K27me3-only	H3K4me3-only	Unmarked	Unmarked	Unmarked	Unmarked	Unmarked	Unmarked	Unmarked	H3K27me3-only	Unmarked	Unmarked	Unmarked	Unmarked	Unmarked	Unmarked
NM_000152	GAA	chr17	78075354	78093679	+	H3K4me3-only	H3K4me3-only	H3K4me3-only	Bivalent	H3K4me3-only	H3K4me3-only	H3K4me3-only	H3K4me3-only	H3K4me3-only	H3K4me3-only	H3K4me3-only	H3K4me3-only	H3K4me3-only	H3K4me3-only	H3K4me3-only	H3K4me3-only	H3K4me3-only	H3K4me3-only	H3K4me3-only	H3K4me3-only
NM_000153	GALC	chr14	88399357	88459615	-	H3K4me3-only	H3K4me3-only	H3K4me3-only	H3K4me3-only	H3K4me3-only	H3K4me3-only	H3K4me3-only	H3K4me3-only	H3K4me3-only	H3K4me3-only	H3K4me3-only	H3K4me3-only	H3K4me3-only	H3K4me3-only	H3K4me3-only	H3K4me3-only	H3K4me3-only	H3K4me3-only	H3K4me3-only	H3K4me3-only
NM_000154	GALK1	chr17	73754017	73761280	-	H3K4me3-only	H3K4me3-only	H3K4me3-only	H3K4me3-only	H3K4me3-only	H3K4me3-only	H3K4me3-only	H3K4me3-only	H3K4me3-only	H3K4me3-only	H3K4me3-only	H3K4me3-only	H3K4me3-only	H3K4me3-only	H3K4me3-only	H3K4me3-only	H3K4me3-only	H3K4me3-only	H3K4me3-only	H3K4me3-only
NM_000157	GBA	chr1	155204238	155211069	-	H3K4me3-only	H3K4me3-only	H3K4me3-only	H3K4me3-only	H3K4me3-only	H3K4me3-only	H3K4me3-only	H3K4me3-only	H3K4me3-only	H3K4me3-only	H3K4me3-only	H3K4me3-only	H3K4me3-only	H3K4me3-only	H3K4me3-only	H3K4me3-only	H3K4me3-only	Unmarked	Unmarked	Unmarked
NM_000158	GBE1	chr3	81538849	81810950	-	H3K4me3-only	H3K4me3-only	H3K4me3-only	H3K4me3-only	H3K4me3-only	H3K4me3-only	H3K4me3-only	H3K4me3-only	H3K4me3-only	H3K4me3-only	H3K4me3-only	H3K4me3-only	H3K4me3-only	H3K4me3-only	H3K4me3-only	H3K4me3-only	H3K4me3-only	H3K4me3-only	H3K4me3-only	H3K4me3-only
NM_000160	GCGR	chr17	79762009	79771889	+	Bivalent	Bivalent	Bivalent	Bivalent	Bivalent	Bivalent	H3K27me3-only	H3K27me3-only	H3K27me3-only	H3K27me3-only	H3K27me3-only	H3K27me3-only	Bivalent	H3K27me3-only	H3K27me3-only	H3K4me3-only	Unmarked	Unmarked	Unmarked	Unmarked
NM_000162	GCK	chr7	44183869	44229022	-	Unmarked	Unmarked	H3K27me3-only	H3K27me3-only	H3K27me3-only	Unmarked	Unmarked	H3K27me3-only	Unmarked	Unmarked	Unmarked	Unmarked	Unmarked	H3K27me3-only	Unmarked	H3K4me3-only	Unmarked	Unmarked	Unmarked	Unmarked
NM_000163	GHR	chr5	42423876	42721980	+	Bivalent	Bivalent	Bivalent	H3K4me3-only	H3K4me3-only	Bivalent	H3K4me3-only	H3K4me3-only	H3K4me3-only	H3K4me3-only	Bivalent	H3K4me3-only	H3K4me3-only	H3K4me3-only	H3K4me3-only	H3K4me3-only	H3K4me3-only	H3K4me3-only	H3K4me3-only	H3K4me3-only
NM_000164	GIPR	chr19	46171501	46185717	+	Bivalent	Bivalent	Bivalent	Bivalent	Bivalent	Bivalent	Bivalent	Bivalent	Bivalent	H3K4me3-only	Bivalent	H3K4me3-only	H3K4me3-only	Bivalent	H3K27me3-only	H3K4me3-only	H3K4me3-only	H3K4me3-only	H3K4me3-only	H3K4me3-only
NM_000165	GJA1	chr6	121756744	121770873	+	H3K4me3-only	H3K4me3-only	H3K4me3-only	H3K4me3-only	H3K4me3-only	H3K27me3-only	H3K4me3-only	H3K4me3-only	H3K4me3-only	Unmarked	H3K27me3-only	H3K4me3-only	H3K4me3-only	H3K4me3-only	H3K4me3-only	Unmarked	Unmarked	H3K4me3-only	Unmarked	Unmarked
NM_000166	GJB1	chrX	70443055	70445065	+	Unmarked	Unmarked	Unmarked	H3K27me3-only	Unmarked	Unmarked	Unmarked	Unmarked	Unmarked	Unmarked	Unmarked	Unmarked	H3K27me3-only	Unmarked	Unmarked	Unmarked	Unmarked	Unmarked	Unmarked	Unmarked
NM_000168	GLI3	chr7	42000547	42276618	-	H3K4me3-only	H3K4me3-only	Bivalent	H3K4me3-only	H3K4me3-only	Bivalent	Bivalent	Bivalent	H3K4me3-only	H3K4me3-only	Bivalent	H3K4me3-only	H3K4me3-only	H3K4me3-only	H3K4me3-only	H3K4me3-only	H3K4me3-only	H3K4me3-only	H3K4me3-only	H3K4me3-only
NM_000169	GLA	chrX	100652778	100663001	-	H3K4me3-only	H3K4me3-only	H3K4me3-only	H3K4me3-only	H3K4me3-only	H3K4me3-only	H3K4me3-only	H3K4me3-only	H3K4me3-only	H3K4me3-only	H3K4me3-only	H3K4me3-only	H3K4me3-only	H3K4me3-only	H3K4me3-only	H3K4me3-only	H3K4me3-only	H3K4me3-only	H3K4me3-only	H3K4me3-only
NM_000170	GLDC	chr9	6532463	6645692	-	Bivalent	Bivalent	Bivalent	Bivalent	Bivalent	Bivalent	Bivalent	Bivalent	Bivalent	H3K4me3-only	Bivalent	H3K4me3-only	Bivalent	Bivalent	Bivalent	H3K4me3-only	H3K4me3-only	H3K4me3-only	H3K4me3-only	H3K4me3-only
NM_000171	GLRA1	chr5	151202073	151304397	-	H3K27me3-only	Bivalent	Bivalent	Unmarked	Unmarked	H3K27me3-only	H3K27me3-only	H3K27me3-only	H3K27me3-only	H3K27me3-only	Unmarked	Unmarked	H3K27me3-only	Unmarked	Unmarked	H3K4me3-only	Unmarked	Unmarked	Unmarked	Unmarked
NM_000173	GP1BA	chr17	4835591	4838325	+	Unmarked	Unmarked	Unmarked	Unmarked	H3K4me3-only	H3K4me3-only	Unmarked	Unmarked	Unmarked	Unmarked	Unmarked	Unmarked	Unmarked	Unmarked	Unmarked	Unmarked	Unmarked	Unmarked	Unmarked	Unmarked
NM_000174	GP9	chr3	128779644	128781253	+	Unmarked	Unmarked	Unmarked	H3K27me3-only	H3K27me3-only	H3K4me3-only	Unmarked	Unmarked	H3K27me3-only	Unmarked	Unmarked	Unmarked	Unmarked	Unmarked	Unmarked	Unmarked	Unmarked	Unmarked	Unmarked	Unmarked
NM_000175	GPI	chr19	34856031	34893318	+	H3K4me3-only	H3K4me3-only	H3K4me3-only	H3K4me3-only	H3K4me3-only	H3K4me3-only	H3K4me3-only	H3K4me3-only	H3K4me3-only	H3K4me3-only	H3K4me3-only	H3K4me3-only	H3K4me3-only	H3K4me3-only	H3K4me3-only	H3K4me3-only	H3K4me3-only	H3K4me3-only	H3K4me3-only	H3K4me3-only
NM_000177	GSN	chr9	124062078	124095120	+	Bivalent	Bivalent	Bivalent	H3K4me3-only	H3K4me3-only	H3K4me3-only	H3K4me3-only	H3K4me3-only	H3K4me3-only	H3K4me3-only	H3K4me3-only	H3K4me3-only	H3K4me3-only	H3K4me3-only	H3K4me3-only	H3K4me3-only	H3K4me3-only	H3K4me3-only	H3K4me3-only	H3K4me3-only
NM_000178	GSS	chr20	33516235	33543601	-	H3K4me3-only	H3K4me3-only	H3K4me3-only	H3K4me3-only	H3K4me3-only	H3K4me3-only	Bivalent	H3K4me3-only	H3K4me3-only	H3K4me3-only	H3K4me3-only	H3K4me3-only	H3K4me3-only	H3K4me3-only	H3K4me3-only	H3K4me3-only	H3K4me3-only	H3K4me3-only	H3K4me3-only	H3K4me3-only
NM_000179	MSH6	chr2	48010220	48034092	+	H3K4me3-only	H3K4me3-only	H3K4me3-only	H3K4me3-only	H3K4me3-only	H3K4me3-only	H3K4me3-only	H3K4me3-only	H3K4me3-only	H3K4me3-only	H3K4me3-only	H3K4me3-only	H3K4me3-only	H3K4me3-only	H3K4me3-only	H3K4me3-only	H3K4me3-only	H3K4me3-only	H3K4me3-only	H3K4me3-only
NM_000180	GUCY2D	chr17	7905987	7923658	+	Bivalent	Bivalent	Bivalent	Bivalent	Bivalent	H3K4me3-only	H3K27me3-only	H3K27me3-only	H3K27me3-only	Bivalent	Bivalent	Unmarked	H3K4me3-only	H3K27me3-only	H3K27me3-only	Unmarked	Unmarked	Unmarked	Unmarked	Unmarked
NM_000181	GUSB	chr7	65425672	65447301	-	H3K4me3-only	H3K4me3-only	H3K4me3-only	H3K4me3-only	H3K4me3-only	H3K4me3-only	H3K4me3-only	H3K4me3-only	H3K4me3-only	H3K4me3-only	H3K4me3-only	H3K4me3-only	H3K4me3-only	H3K4me3-only	H3K4me3-only	H3K4me3-only	H3K4me3-only	H3K4me3-only	H3K4me3-only	H3K4me3-only
NM_000182	HADHA	chr2	26413503	26467594	-	H3K4me3-only	H3K4me3-only	Bivalent	H3K4me3-only	H3K4me3-only	H3K4me3-only	H3K4me3-only	H3K4me3-only	H3K4me3-only	H3K4me3-only	H3K4me3-only	H3K4me3-only	H3K4me3-only	H3K4me3-only	H3K4me3-only	H3K4me3-only	H3K4me3-only	H3K4me3-only	H3K4me3-only	H3K4me3-only
NM_000183	HADHB	chr2	26467615	26513333	+	H3K4me3-only	H3K4me3-only	Bivalent	H3K4me3-only	H3K4me3-only	H3K4me3-only	H3K4me3-only	H3K4me3-only	H3K4me3-only	H3K4me3-only	H3K4me3-only	H3K4me3-only	H3K4me3-only	H3K4me3-only	H3K4me3-only	H3K4me3-only	H3K4me3-only	H3K4me3-only	H3K4me3-only	H3K4me3-only
NM_000184	HBG2	chr11	5274420	5276011	-	Unmarked	Unmarked	Unmarked	Unmarked	Unmarked	Unmarked	Unmarked	Unmarked	Unmarked	Unmarked	Unmarked	Unmarked	Unmarked	Unmarked	Unmarked	Unmarked	Unmarked	Unmarked	Unmarked	Unmarked
NM_000185	SERPIND1	chr22	21128382	21142008	+	Unmarked	Unmarked	Unmarked	Unmarked	Unmarked	Unmarked	Unmarked	Unmarked	Unmarked	Unmarked	Unmarked	Unmarked	Unmarked	Unmarked	Unmarked	Unmarked	Unmarked	Unmarked	Unmarked	Unmarked
NM_000186	CFH	chr1	196621007	196716634	+	Unmarked	Unmarked	Unmarked	H3K4me3-only	H3K4me3-only	H3K4me3-only	Unmarked	H3K4me3-only	Unmarked	Unmarked	H3K4me3-only	H3K4me3-only	H3K4me3-only	H3K4me3-only	H3K4me3-only	Unmarked	Unmarked	Unmarked	Unmarked	Unmarked
NM_000187	HGD	chr3	120347014	120401418	-	Unmarked	Unmarked	Unmarked	Unmarked	Unmarked	Unmarked	Unmarked	H3K4me3-only	Unmarked	Unmarked	Unmarked	Unmarked	Unmarked	Unmarked	Unmarked	Unmarked	Unmarked	Unmarked	Unmarked	Unmarked
NM_000188	HK1	chr10	71078602	71161637	+	H3K4me3-only	H3K4me3-only	H3K4me3-only	H3K4me3-only	H3K4me3-only	H3K4me3-only	H3K4me3-only	H3K4me3-only	H3K4me3-only	H3K4me3-only	H3K4me3-only	H3K4me3-only	H3K4me3-only	H3K4me3-only	H3K4me3-only	H3K4me3-only	H3K4me3-only	H3K4me3-only	H3K4me3-only	H3K4me3-only
NM_000189	HK2	chr2	75059781	75120481	+	Unmarked	Unmarked	H3K27me3-only	Unmarked	Unmarked	Unmarked	H3K27me3-only	H3K27me3-only	Unmarked	Unmarked	Unmarked	Unmarked	Unmarked	Unmarked	Unmarked	Unmarked	Unmarked	Unmarked	Unmarked	Unmarked
NM_000191	HMGCL	chr1	24128366	24151949	-	H3K4me3-only	H3K4me3-only	H3K4me3-only	H3K4me3-only	H3K4me3-only	H3K4me3-only	H3K4me3-only	H3K4me3-only	H3K4me3-only	H3K4me3-only	H3K4me3-only	H3K4me3-only	H3K4me3-only	H3K4me3-only	H3K4me3-only	H3K4me3-only	H3K4me3-only	H3K4me3-only	H3K4me3-only	H3K4me3-only
NM_000192	TBX5	chr12	114791734	114846247	-	H3K27me3-only	H3K27me3-only	H3K27me3-only	H3K4me3-only	H3K4me3-only	H3K27me3-only	H3K27me3-only	H3K27me3-only	H3K27me3-only	H3K27me3-only	H3K27me3-only	H3K27me3-only	H3K27me3-only	H3K4me3-only	H3K27me3-only	Unmarked	Unmarked	H3K4me3-only	Unmarked	Unmarked
NM_000193	SHH	chr7	155595557	155604967	-	H3K27me3-only	Bivalent	Bivalent	Bivalent	Bivalent	Bivalent	Bivalent	Bivalent	Bivalent	Bivalent	H3K27me3-only	Bivalent	Bivalent	Bivalent	H3K27me3-only	Unmarked	H3K4me3-only	Unmarked	H3K4me3-only	Unmarked
NM_000194	HPRT1	chrX	133594174	133634698	+	H3K4me3-only	H3K4me3-only	H3K4me3-only	H3K4me3-only	H3K4me3-only	H3K4me3-only	H3K4me3-only	H3K4me3-only	H3K4me3-only	H3K4me3-only	H3K4me3-only	H3K4me3-only	H3K4me3-only	H3K4me3-only	H3K4me3-only	H3K4me3-only	H3K4me3-only	H3K4me3-only	H3K4me3-only	H3K4me3-only
NM_000196	HSD11B2	chr16	67465035	67471454	+	Bivalent	Bivalent	Bivalent	Bivalent	Bivalent	Bivalent	Bivalent	Bivalent	Bivalent	Bivalent	Bivalent	Bivalent	H3K4me3-only	Bivalent	Bivalent	H3K4me3-only	H3K4me3-only	H3K4me3-only	H3K4me3-only	H3K4me3-only
NM_000197	HSD17B3	chr9	98997588	99064434	-	Unmarked	Unmarked	Unmarked	Unmarked	Unmarked	Unmarked	Unmarked	Unmarked	H3K27me3-only	Unmarked	Unmarked	Unmarked	Unmarked	Unmarked	Unmarked	Unmarked	Unmarked	Unmarked	Unmarked	Unmarked
NM_000198	HSD3B2	chr1	119957742	119965662	+	Unmarked	Unmarked	Unmarked	Unmarked	Unmarked	Unmarked	Unmarked	Unmarked	Unmarked	Unmarked	Unmarked	H3K27me3-only	Unmarked	Unmarked	Unmarked	Unmarked	Unmarked	Unmarked	Unmarked	Unmarked
NM_000199	SGSH	chr17	78183078	78194199	-	H3K4me3-only	H3K4me3-only	H3K4me3-only	Bivalent	H3K4me3-only	Bivalent	H3K4me3-only	H3K4me3-only	H3K4me3-only	H3K4me3-only	H3K4me3-only	H3K4me3-only	H3K4me3-only	H3K4me3-only	H3K4me3-only	H3K4me3-only	H3K4me3-only	H3K4me3-only	H3K4me3-only	H3K4me3-only
NM_000200	HTN3	chr4	70894129	70902255	+	Unmarked	Unmarked	Unmarked	Unmarked	Unmarked	Unmarked	Unmarked	Unmarked	Unmarked	Unmarked	Unmarked	Unmarked	Unmarked	Unmarked	Unmarked	Unmarked	Unmarked	Unmarked	Unmarked	Unmarked
NM_000201	ICAM1	chr19	10381516	10397291	+	Bivalent	Bivalent	Bivalent	Bivalent	Bivalent	H3K4me3-only	Bivalent	Bivalent	Bivalent	H3K4me3-only	H3K4me3-only	H3K4me3-only	H3K4me3-only	Bivalent	H3K4me3-only	H3K4me3-only	H3K4me3-only	H3K4me3-only	H3K4me3-only	H3K4me3-only
NM_000202	IDS	chrX	148560294	148586884	-	H3K4me3-only	H3K4me3-only	H3K4me3-only	H3K4me3-only	H3K4me3-only	H3K4me3-only	H3K4me3-only	H3K4me3-only	H3K4me3-only	H3K4me3-only	H3K4me3-only	H3K4me3-only	Bivalent	H3K4me3-only	H3K4me3-only	H3K4me3-only	H3K4me3-only	H3K4me3-only	H3K4me3-only	H3K4me3-only
NM_000203	IDUA	chr4	980784	998317	+	Bivalent	Bivalent	H3K4me3-only	H3K4me3-only	H3K4me3-only	H3K4me3-only	H3K4me3-only	H3K4me3-only	H3K4me3-only	H3K4me3-only	H3K4me3-only	H3K4me3-only	H3K4me3-only	H3K4me3-only	H3K4me3-only	H3K4me3-only	H3K4me3-only	H3K4me3-only	H3K4me3-only	H3K4me3-only
NM_000204	CFI	chr4	110661847	110723335	-	Unmarked	Unmarked	Unmarked	Unmarked	Unmarked	Unmarked	H3K4me3-only	H3K4me3-only	Unmarked	Unmarked	Unmarked	Unmarked	H3K4me3-only	Unmarked	H3K4me3-only	H3K4me3-only	Unmarked	Unmarked	Unmarked	Unmarked
NM_000206	IL2RG	chrX	70327253	70331481	-	Unmarked	H3K27me3-only	Unmarked	H3K27me3-only	H3K27me3-only	H3K4me3-only	H3K4me3-only	H3K4me3-only	H3K4me3-only	Unmarked	H3K4me3-only	Unmarked	Unmarked	H3K27me3-only	Unmarked	Unmarked	H3K4me3-only	Unmarked	Unmarked	Unmarked
NM_000209	PDX1	chr13	28494167	28500451	+	H3K27me3-only	H3K27me3-only	Bivalent	Bivalent	Bivalent	Bivalent	Bivalent	Bivalent	Bivalent	Bivalent	Bivalent	Bivalent	Bivalent	H3K27me3-only	H3K27me3-only	H3K4me3-only	Unmarked	Unmarked	H3K4me3-only	H3K4me3-only
NM_000210	ITGA6	chr2	173292313	173371181	+	H3K4me3-only	H3K4me3-only	Bivalent	Bivalent	Bivalent	H3K4me3-only	H3K4me3-only	H3K4me3-only	H3K4me3-only	H3K4me3-only	H3K4me3-only	H3K4me3-only	H3K4me3-only	H3K4me3-only	H3K4me3-only	H3K4me3-only	H3K4me3-only	H3K4me3-only	H3K4me3-only	H3K4me3-only
NM_000211	ITGB2	chr21	46305867	46340965	-	H3K27me3-only	H3K27me3-only	H3K27me3-only	H3K27me3-only	H3K27me3-only	H3K4me3-only	Bivalent	Unmarked	H3K27me3-only	H3K27me3-only	H3K4me3-only	Unmarked	Unmarked	H3K27me3-only	Unmarked	Unmarked	H3K4me3-only	Unmarked	H3K4me3-only	Unmarked
NM_000212	ITGB3	chr17	45331207	45390077	+	Bivalent	Bivalent	Bivalent	Bivalent	H3K4me3-only	Bivalent	Bivalent	H3K4me3-only	Bivalent	H3K4me3-only	Bivalent	Bivalent	H3K4me3-only	H3K4me3-only	H3K4me3-only	H3K4me3-only	H3K4me3-only	H3K4me3-only	H3K4me3-only	H3K4me3-only
NM_000213	ITGB4	chr17	73717515	73753899	+	Bivalent	Bivalent	Bivalent	Bivalent	Bivalent	Bivalent	H3K4me3-only	H3K4me3-only	H3K4me3-only	Bivalent	Bivalent	H3K4me3-only	H3K4me3-only	H3K27me3-only	H3K4me3-only	H3K4me3-only	H3K4me3-only	H3K4me3-only	H3K4me3-only	H3K4me3-only
NM_000214	JAG1	chr20	10618331	10654694	-	H3K4me3-only	H3K4me3-only	Bivalent	H3K4me3-only	H3K4me3-only	H3K4me3-only	H3K4me3-only	H3K4me3-only	H3K4me3-only	H3K4me3-only	Bivalent	H3K4me3-only	H3K4me3-only	H3K4me3-only	H3K4me3-only	H3K4me3-only	H3K4me3-only	H3K4me3-only	H3K4me3-only	H3K4me3-only
NM_000215	JAK3	chr19	17935592	17958841	-	H3K4me3-only	H3K4me3-only	H3K4me3-only	H3K4me3-only	H3K4me3-only	H3K4me3-only	H3K4me3-only	H3K4me3-only	Unmarked	H3K4me3-only	H3K4me3-only	Unmarked	H3K4me3-only	Unmarked	Unmarked	Unmarked	H3K4me3-only	H3K4me3-only	Unmarked	Unmarked
NM_000216	KAL1	chrX	8496914	8700227	-	H3K4me3-only	Bivalent	Bivalent	Bivalent	Bivalent	Bivalent	Bivalent	Bivalent	Bivalent	Bivalent	H3K27me3-only	Bivalent	Bivalent	H3K27me3-only	H3K4me3-only	H3K4me3-only	H3K4me3-only	H3K4me3-only	H3K4me3-only	H3K4me3-only
NM_000217	KCNA1	chr12	5019072	5027422	+	Bivalent	Bivalent	Bivalent	Bivalent	Bivalent	Bivalent	Bivalent	Bivalent	Bivalent	Bivalent	Bivalent	Bivalent	Bivalent	H3K27me3-only	H3K27me3-only	H3K4me3-only	H3K4me3-only	Unmarked	Unmarked	H3K4me3-only
NM_000218	KCNQ1	chr11	2466220	2870340	+	Bivalent	Bivalent	H3K27me3-only	Bivalent	Bivalent	Bivalent	Bivalent	Bivalent	H3K27me3-only	H3K27me3-only	H3K4me3-only	H3K27me3-only	H3K4me3-only	H3K27me3-only	H3K27me3-only	H3K4me3-only	H3K4me3-only	H3K4me3-only	H3K4me3-only	H3K4me3-only
NM_000219	KCNE1	chr21	35818985	35884573	-	Unmarked	Unmarked	Unmarked	Unmarked	Unmarked	Unmarked	Unmarked	Unmarked	Unmarked	Unmarked	Unmarked	Unmarked	Unmarked	Unmarked	Unmarked	Unmarked	Unmarked	Unmarked	Unmarked	Unmarked
NM_000220	KCNJ1	chr11	128707908	128712429	-	Unmarked	Unmarked	Unmarked	Unmarked	Unmarked	Unmarked	Unmarked	Unmarked	Unmarked	Unmarked	Unmarked	Unmarked	Unmarked	H3K27me3-only	Unmarked	Unmarked	Unmarked	Unmarked	Unmarked	Unmarked
NM_000222	KIT	chr4	55524094	55606881	+	Bivalent	Bivalent	Bivalent	Bivalent	Bivalent	H3K4me3-only	Bivalent	Bivalent	Bivalent	H3K4me3-only	Bivalent	Bivalent	H3K4me3-only	Bivalent	Bivalent	H3K4me3-only	H3K4me3-only	H3K4me3-only	H3K4me3-only	H3K4me3-only
NM_000223	KRT12	chr17	39017429	39023462	-	Unmarked	Unmarked	Unmarked	Unmarked	Unmarked	Unmarked	Unmarked	Unmarked	Unmarked	Unmarked	Unmarked	Unmarked	Unmarked	Unmarked	Unmarked	Unmarked	Unmarked	Unmarked	Unmarked	Unmarked
NM_000224	KRT18	chr12	53342842	53346685	+	H3K4me3-only	H3K4me3-only	Bivalent	Bivalent	Bivalent	H3K4me3-only	H3K4me3-only	H3K4me3-only	H3K4me3-only	Bivalent	H3K4me3-only	H3K4me3-only	H3K4me3-only	Bivalent	H3K4me3-only	H3K4me3-only	H3K4me3-only	H3K4me3-only	H3K4me3-only	H3K4me3-only
NM_000226	KRT9	chr17	39722093	39728310	-	Unmarked	Unmarked	H3K27me3-only	H3K27me3-only	H3K27me3-only	H3K27me3-only	H3K27me3-only	H3K27me3-only	Unmarked	H3K27me3-only	Unmarked	H3K27me3-only	Unmarked	H3K27me3-only	Unmarked	Unmarked	Unmarked	Unmarked	Unmarked	Unmarked
NM_000228	LAMB3	chr1	209788217	209825820	-	Unmarked	Unmarked	Unmarked	Unmarked	H3K27me3-only	Unmarked	H3K4me3-only	H3K4me3-only	H3K4me3-only	Unmarked	Unmarked	H3K4me3-only	H3K4me3-only	Unmarked	Unmarked	Unmarked	H3K4me3-only	Unmarked	Unmarked	Unmarked
NM_000229	LCAT	chr16	67973786	67978015	-	Unmarked	Unmarked	Unmarked	H3K4me3-only	H3K4me3-only	Unmarked	Unmarked	Unmarked	Unmarked	H3K4me3-only	Unmarked	Unmarked	Unmarked	Unmarked	Unmarked	Unmarked	Unmarked	Unmarked	Unmarked	Unmarked
NM_000230	LEP	chr7	127881330	127897682	+	Unmarked	Unmarked	H3K27me3-only	Bivalent	H3K27me3-only	H3K27me3-only	H3K27me3-only	H3K27me3-only	Bivalent	Bivalent	H3K27me3-only	Unmarked	H3K27me3-only	H3K27me3-only	H3K27me3-only	Unmarked	Unmarked	Unmarked	Unmarked	Unmarked
NM_000231	SGCG	chr13	23755059	23899304	+	Unmarked	Unmarked	Unmarked	Unmarked	Unmarked	Unmarked	Unmarked	Unmarked	Unmarked	Unmarked	Unmarked	Unmarked	Unmarked	Unmarked	Unmarked	Unmarked	Unmarked	Unmarked	Unmarked	Unmarked
NM_000232	SGCB	chr4	52886860	52904485	-	H3K4me3-only	H3K4me3-only	H3K4me3-only	H3K4me3-only	H3K4me3-only	Bivalent	H3K4me3-only	H3K4me3-only	H3K4me3-only	H3K4me3-only	H3K4me3-only	H3K4me3-only	H3K4me3-only	H3K4me3-only	H3K4me3-only	H3K4me3-only	H3K4me3-only	H3K4me3-only	H3K4me3-only	H3K4me3-only
NM_000233	LHCGR	chr2	48913912	48982880	-	Bivalent	Bivalent	H3K4me3-only	H3K4me3-only	Bivalent	Bivalent	H3K27me3-only	H3K27me3-only	H3K27me3-only	Bivalent	H3K27me3-only	H3K27me3-only	Unmarked	H3K27me3-only	Unmarked	Unmarked	H3K4me3-only	Unmarked	Unmarked	Unmarked
NM_000234	LIG1	chr19	48618702	48673560	-	H3K4me3-only	H3K4me3-only	H3K4me3-only	H3K4me3-only	H3K4me3-only	H3K4me3-only	H3K4me3-only	H3K4me3-only	H3K4me3-only	H3K4me3-only	H3K4me3-only	H3K4me3-only	H3K4me3-only	H3K4me3-only	H3K4me3-only	H3K4me3-only	H3K4me3-only	H3K4me3-only	H3K4me3-only	H3K4me3-only
NM_000236	LIPC	chr15	58724174	58861073	+	Unmarked	Unmarked	Unmarked	Unmarked	Unmarked	Unmarked	Unmarked	Unmarked	Unmarked	Unmarked	Unmarked	Unmarked	Unmarked	Unmarked	Unmarked	Unmarked	Unmarked	Unmarked	Unmarked	Unmarked
NM_000237	LPL	chr8	19796581	19824770	+	Bivalent	Bivalent	Bivalent	Bivalent	Bivalent	Bivalent	H3K27me3-only	H3K27me3-only	H3K27me3-only	H3K4me3-only	H3K27me3-only	H3K27me3-only	Bivalent	H3K27me3-only	H3K27me3-only	Unmarked	Unmarked	H3K4me3-only	Unmarked	H3K4me3-only
NM_000239	LYZ	chr12	69742133	69748013	+	Unmarked	Unmarked	Unmarked	Unmarked	Unmarked	H3K4me3-only	Unmarked	Unmarked	Unmarked	Unmarked	H3K4me3-only	Unmarked	Unmarked	Unmarked	Unmarked	Unmarked	Unmarked	Unmarked	Unmarked	Unmarked
NM_000242	MBL2	chr10	54525139	54531460	-	Unmarked	Unmarked	Unmarked	Unmarked	Unmarked	Unmarked	Unmarked	Unmarked	Unmarked	Unmarked	Unmarked	Unmarked	Unmarked	Unmarked	Unmarked	Unmarked	Unmarked	Unmarked	Unmarked	Unmarked
NM_000243	MEFV	chr16	3292027	3306627	-	Unmarked	Unmarked	H3K27me3-only	Bivalent	H3K27me3-only	H3K27me3-only	H3K27me3-only	H3K27me3-only	Unmarked	Unmarked	H3K4me3-only	Unmarked	H3K27me3-only	Unmarked	Unmarked	Unmarked	Unmarked	Unmarked	Unmarked	Unmarked
NM_000244	MEN1	chr11	64570985	64578188	-	H3K4me3-only	H3K4me3-only	H3K4me3-only	H3K4me3-only	H3K4me3-only	H3K4me3-only	H3K4me3-only	H3K4me3-only	H3K4me3-only	H3K4me3-only	H3K4me3-only	H3K4me3-only	H3K4me3-only	H3K4me3-only	H3K4me3-only	H3K4me3-only	H3K4me3-only	H3K4me3-only	H3K4me3-only	H3K4me3-only
NM_000246	CIITA	chr16	10971054	11018840	+	H3K27me3-only	H3K27me3-only	H3K27me3-only	H3K27me3-only	Bivalent	H3K4me3-only	H3K27me3-only	H3K27me3-only	H3K27me3-only	H3K27me3-only	H3K4me3-only	Unmarked	Unmarked	Unmarked	Unmarked	Unmarked	H3K4me3-only	Unmarked	Unmarked	Unmarked
NM_000247	MICA	chr6	31371370	31383090	+	H3K4me3-only	Bivalent	Bivalent	H3K4me3-only	H3K4me3-only	H3K4me3-only	Bivalent	Bivalent	H3K4me3-only	H3K4me3-only	H3K4me3-only	H3K4me3-only	H3K4me3-only	H3K4me3-only	H3K4me3-only	H3K4me3-only	H3K4me3-only	H3K4me3-only	H3K4me3-only	H3K4me3-only
NM_000250	MPO	chr17	56347216	56358296	-	Unmarked	H3K27me3-only	H3K27me3-only	H3K27me3-only	H3K27me3-only	Unmarked	H3K27me3-only	H3K27me3-only	H3K27me3-only	H3K27me3-only	Unmarked	H3K27me3-only	Unmarked	Unmarked	Unmarked	Unmarked	Unmarked	Unmarked	Unmarked	Unmarked
NM_000251	MSH2	chr2	47630205	47710367	+	H3K4me3-only	H3K4me3-only	H3K4me3-only	H3K4me3-only	H3K4me3-only	H3K4me3-only	H3K4me3-only	H3K4me3-only	H3K4me3-only	H3K4me3-only	H3K4me3-only	H3K4me3-only	H3K4me3-only	H3K4me3-only	H3K4me3-only	H3K4me3-only	H3K4me3-only	H3K4me3-only	H3K4me3-only	H3K4me3-only
NM_000252	MTM1	chrX	149737046	149841616	+	H3K4me3-only	H3K4me3-only	H3K4me3-only	H3K4me3-only	H3K4me3-only	H3K4me3-only	H3K4me3-only	H3K4me3-only	H3K4me3-only	H3K4me3-only	H3K4me3-only	H3K4me3-only	Bivalent	H3K4me3-only	H3K4me3-only	H3K4me3-only	H3K4me3-only	H3K4me3-only	H3K4me3-only	H3K4me3-only
NM_000253	MTTP	chr4	100485239	100545154	+	H3K4me3-only	H3K4me3-only	H3K4me3-only	H3K4me3-only	H3K4me3-only	H3K4me3-only	H3K4me3-only	H3K4me3-only	H3K4me3-only	H3K4me3-only	H3K4me3-only	H3K4me3-only	H3K4me3-only	H3K4me3-only	H3K4me3-only	H3K4me3-only	H3K4me3-only	H3K4me3-only	H3K4me3-only	H3K4me3-only
NM_000254	MTR	chr1	236958580	237067281	+	H3K4me3-only	H3K4me3-only	H3K4me3-only	H3K4me3-only	H3K4me3-only	H3K4me3-only	H3K4me3-only	H3K4me3-only	H3K4me3-only	H3K4me3-only	H3K4me3-only	H3K4me3-only	H3K4me3-only	H3K4me3-only	H3K4me3-only	H3K4me3-only	H3K4me3-only	H3K4me3-only	H3K4me3-only	H3K4me3-only
NM_000255	MUT	chr6	49398072	49431041	-	H3K4me3-only	H3K4me3-only	H3K4me3-only	H3K4me3-only	H3K4me3-only	H3K4me3-only	H3K4me3-only	H3K4me3-only	H3K4me3-only	H3K4me3-only	H3K4me3-only	H3K4me3-only	H3K4me3-only	H3K4me3-only	H3K4me3-only	H3K4me3-only	H3K4me3-only	H3K4me3-only	H3K4me3-only	H3K4me3-only
NM_000256	MYBPC3	chr11	47352956	47374253	-	Unmarked	Unmarked	Unmarked	H3K27me3-only	Bivalent	Unmarked	Unmarked	Unmarked	Unmarked	Unmarked	Unmarked	Unmarked	Unmarked	Unmarked	Unmarked	Unmarked	Unmarked	H3K4me3-only	Unmarked	Unmarked
NM_000257	MYH7	chr14	23881946	23904870	-	Unmarked	Unmarked	Unmarked	H3K27me3-only	H3K27me3-only	Unmarked	Unmarked	Unmarked	Unmarked	H3K27me3-only	Unmarked	H3K27me3-only	Unmarked	H3K27me3-only	Unmarked	Unmarked	Unmarked	H3K4me3-only	Unmarked	Unmarked
NM_000258	MYL3	chr3	46899356	46904973	-	Unmarked	Unmarked	Unmarked	H3K27me3-only	H3K27me3-only	Unmarked	Unmarked	Unmarked	H3K27me3-only	H3K27me3-only	Unmarked	Unmarked	Unmarked	H3K27me3-only	Unmarked	Unmarked	Unmarked	H3K4me3-only	H3K4me3-only	Unmarked
NM_000260	MYO7A	chr11	76839309	76926286	+	Unmarked	H3K4me3-only	H3K4me3-only	Bivalent	Bivalent	Unmarked	H3K4me3-only	H3K4me3-only	Unmarked	H3K27me3-only	Unmarked	Unmarked	H3K4me3-only	Unmarked	Unmarked	H3K4me3-only	Unmarked	Unmarked	Unmarked	H3K4me3-only
NM_000261	MYOC	chr1	171604556	171621773	-	Unmarked	Unmarked	Unmarked	Unmarked	Unmarked	Unmarked	Unmarked	Unmarked	H3K27me3-only	Unmarked	Unmarked	Unmarked	Unmarked	Unmarked	Unmarked	Unmarked	Unmarked	Unmarked	Unmarked	Unmarked
NM_000262	NAGA	chr22	42454337	42466846	-	H3K4me3-only	H3K4me3-only	H3K4me3-only	H3K4me3-only	H3K4me3-only	H3K4me3-only	H3K4me3-only	H3K4me3-only	H3K4me3-only	H3K4me3-only	H3K4me3-only	H3K4me3-only	H3K4me3-only	H3K4me3-only	H3K4me3-only	H3K4me3-only	H3K4me3-only	H3K4me3-only	H3K4me3-only	H3K4me3-only
NM_000263	NAGLU	chr17	40687950	40696466	+	H3K4me3-only	H3K4me3-only	H3K4me3-only	H3K4me3-only	H3K4me3-only	H3K4me3-only	H3K4me3-only	H3K4me3-only	H3K4me3-only	H3K4me3-only	H3K4me3-only	H3K4me3-only	H3K4me3-only	H3K4me3-only	H3K4me3-only	H3K4me3-only	H3K4me3-only	H3K4me3-only	H3K4me3-only	H3K4me3-only
NM_000264	PTCH1	chr9	98205263	98270831	-	H3K4me3-only	H3K4me3-only	Bivalent	H3K4me3-only	H3K4me3-only	Bivalent	H3K4me3-only	H3K4me3-only	H3K4me3-only	H3K4me3-only	Bivalent	H3K4me3-only	H3K4me3-only	H3K4me3-only	H3K4me3-only	H3K4me3-only	H3K4me3-only	H3K4me3-only	H3K4me3-only	H3K4me3-only
NM_000265	NCF1	chr7	74188308	74203659	+	Unmarked	Unmarked	Unmarked	Unmarked	Unmarked	Unmarked	Unmarked	Unmarked	Unmarked	Unmarked	Unmarked	Unmarked	Unmarked	Unmarked	Unmarked	Unmarked	Unmarked	Unmarked	Unmarked	Unmarked
NM_000266	NDP	chrX	43808023	43832921	-	Bivalent	Bivalent	H3K4me3-only	H3K4me3-only	H3K4me3-only	Bivalent	H3K4me3-only	H3K4me3-only	H3K4me3-only	H3K4me3-only	H3K4me3-only	H3K4me3-only	Bivalent	H3K4me3-only	H3K4me3-only	Unmarked	Unmarked	Unmarked	Unmarked	Unmarked
NM_000269	NME1	chr17	49230919	49239450	+	H3K4me3-only	H3K4me3-only	H3K4me3-only	H3K4me3-only	H3K4me3-only	H3K4me3-only	H3K4me3-only	H3K4me3-only	H3K4me3-only	H3K4me3-only	H3K4me3-only	H3K4me3-only	H3K4me3-only	H3K4me3-only	H3K4me3-only	H3K4me3-only	H3K4me3-only	H3K4me3-only	H3K4me3-only	H3K4me3-only
NM_000270	PNP	chr14	20937537	20946165	+	H3K4me3-only	H3K4me3-only	H3K4me3-only	H3K4me3-only	H3K4me3-only	H3K4me3-only	H3K4me3-only	H3K4me3-only	H3K4me3-only	H3K4me3-only	H3K4me3-only	H3K4me3-only	H3K4me3-only	H3K4me3-only	H3K4me3-only	H3K4me3-only	H3K4me3-only	H3K4me3-only	H3K4me3-only	H3K4me3-only
NM_000271	NPC1	chr18	21111462	21166581	-	H3K4me3-only	H3K4me3-only	Bivalent	H3K4me3-only	H3K4me3-only	H3K4me3-only	H3K4me3-only	H3K4me3-only	H3K4me3-only	H3K4me3-only	H3K4me3-only	H3K4me3-only	H3K4me3-only	H3K4me3-only	H3K4me3-only	H3K4me3-only	H3K4me3-only	H3K4me3-only	H3K4me3-only	H3K4me3-only
NM_000273	GPR143	chrX	9693452	9734005	-	H3K4me3-only	H3K4me3-only	H3K27me3-only	H3K27me3-only	H3K27me3-only	H3K27me3-only	Unmarked	Unmarked	Unmarked	H3K4me3-only	H3K27me3-only	Unmarked	Bivalent	Unmarked	Unmarked	Unmarked	Unmarked	Unmarked	Unmarked	Unmarked
NM_000275	OCA2	chr15	28000022	28344458	-	Bivalent	Bivalent	Bivalent	Bivalent	Bivalent	Bivalent	Bivalent	Bivalent	H3K27me3-only	H3K4me3-only	H3K27me3-only	H3K27me3-only	H3K4me3-only	H3K27me3-only	H3K27me3-only	Unmarked	Unmarked	Unmarked	Unmarked	Unmarked
NM_000276	OCRL	chrX	128674251	128726530	+	H3K4me3-only	H3K4me3-only	H3K4me3-only	H3K4me3-only	H3K4me3-only	H3K4me3-only	H3K4me3-only	H3K4me3-only	H3K4me3-only	H3K4me3-only	H3K4me3-only	H3K4me3-only	H3K4me3-only	H3K4me3-only	H3K4me3-only	H3K4me3-only	H3K4me3-only	H3K4me3-only	H3K4me3-only	H3K4me3-only
NM_000277	PAH	chr12	103232103	103311381	-	H3K4me3-only	H3K4me3-only	H3K4me3-only	Unmarked	Unmarked	Bivalent	H3K4me3-only	H3K4me3-only	H3K4me3-only	H3K4me3-only	H3K4me3-only	Unmarked	H3K4me3-only	Unmarked	Unmarked	H3K4me3-only	H3K4me3-only	Unmarked	H3K4me3-only	H3K4me3-only
NM_000280	PAX6	chr11	31806339	31832901	-	Bivalent	Bivalent	Bivalent	Bivalent	Bivalent	Bivalent	H3K27me3-only	H3K27me3-only	Bivalent	Bivalent	Bivalent	Bivalent	Bivalent	H3K27me3-only	H3K27me3-only	H3K4me3-only	Unmarked	Unmarked	Unmarked	H3K4me3-only
NM_000281	PCBD1	chr10	72643266	72648541	-	H3K4me3-only	H3K4me3-only	H3K4me3-only	H3K4me3-only	H3K4me3-only	H3K4me3-only	H3K4me3-only	H3K4me3-only	H3K4me3-only	H3K4me3-only	H3K4me3-only	H3K4me3-only	H3K4me3-only	H3K4me3-only	H3K4me3-only	H3K4me3-only	H3K4me3-only	H3K4me3-only	H3K4me3-only	H3K4me3-only
NM_000286	PEX12	chr17	33901813	33905656	-	H3K4me3-only	H3K4me3-only	H3K4me3-only	H3K4me3-only	H3K4me3-only	H3K4me3-only	H3K4me3-only	H3K4me3-only	H3K4me3-only	H3K4me3-only	H3K4me3-only	H3K4me3-only	H3K4me3-only	H3K4me3-only	H3K4me3-only	H3K4me3-only	H3K4me3-only	H3K4me3-only	H3K4me3-only	H3K4me3-only
NM_000287	PEX6	chr6	42931610	42946981	-	H3K4me3-only	H3K4me3-only	H3K4me3-only	H3K4me3-only	H3K4me3-only	H3K4me3-only	H3K4me3-only	H3K4me3-only	H3K4me3-only	H3K4me3-only	H3K4me3-only	H3K4me3-only	H3K4me3-only	H3K4me3-only	H3K4me3-only	H3K4me3-only	H3K4me3-only	H3K4me3-only	H3K4me3-only	H3K4me3-only
NM_000288	PEX7	chr6	137143701	137235072	+	H3K4me3-only	H3K4me3-only	H3K4me3-only	H3K4me3-only	H3K4me3-only	H3K4me3-only	H3K4me3-only	H3K4me3-only	H3K4me3-only	H3K4me3-only	H3K4me3-only	H3K4me3-only	H3K4me3-only	H3K4me3-only	H3K4me3-only	H3K4me3-only	H3K4me3-only	H3K4me3-only	H3K4me3-only	H3K4me3-only
NM_000289	PFKM	chr12	48513012	48540187	+	H3K4me3-only	H3K4me3-only	H3K4me3-only	H3K4me3-only	H3K4me3-only	H3K4me3-only	H3K4me3-only	H3K4me3-only	H3K4me3-only	H3K4me3-only	H3K4me3-only	H3K4me3-only	H3K4me3-only	H3K4me3-only	H3K4me3-only	H3K4me3-only	H3K4me3-only	H3K4me3-only	H3K4me3-only	H3K4me3-only
NM_000290	PGAM2	chr7	44102325	44105186	-	Unmarked	H3K4me3-only	H3K4me3-only	Bivalent	Bivalent	Unmarked	Bivalent	H3K27me3-only	H3K27me3-only	Bivalent	Unmarked	Unmarked	Unmarked	H3K27me3-only	Unmarked	Unmarked	Unmarked	H3K4me3-only	Unmarked	Unmarked
NM_000291	PGK1	chrX	77359665	77382324	+	H3K4me3-only	H3K4me3-only	H3K4me3-only	H3K4me3-only	H3K4me3-only	H3K4me3-only	H3K4me3-only	H3K4me3-only	H3K4me3-only	H3K4me3-only	H3K4me3-only	H3K4me3-only	H3K4me3-only	H3K4me3-only	H3K4me3-only	H3K4me3-only	H3K4me3-only	H3K4me3-only	H3K4me3-only	H3K4me3-only
NM_000292	PHKA2	chrX	18910415	19002480	-	H3K4me3-only	H3K4me3-only	H3K4me3-only	H3K4me3-only	H3K4me3-only	H3K4me3-only	H3K4me3-only	H3K4me3-only	H3K4me3-only	H3K4me3-only	H3K4me3-only	H3K4me3-only	Bivalent	H3K4me3-only	H3K4me3-only	H3K4me3-only	H3K4me3-only	H3K4me3-only	H3K4me3-only	H3K4me3-only
NM_000293	PHKB	chr16	47495209	47735434	+	H3K4me3-only	H3K4me3-only	Bivalent	H3K4me3-only	H3K4me3-only	H3K4me3-only	H3K4me3-only	H3K4me3-only	H3K4me3-only	H3K4me3-only	H3K4me3-only	H3K4me3-only	H3K4me3-only	H3K4me3-only	H3K4me3-only	H3K4me3-only	H3K4me3-only	H3K4me3-only	H3K4me3-only	H3K4me3-only
NM_000294	PHKG2	chr16	30759619	30772497	+	H3K4me3-only	H3K4me3-only	H3K4me3-only	H3K4me3-only	H3K4me3-only	H3K4me3-only	H3K4me3-only	H3K4me3-only	H3K4me3-only	H3K4me3-only	H3K4me3-only	H3K4me3-only	H3K4me3-only	H3K4me3-only	H3K4me3-only	H3K4me3-only	H3K4me3-only	H3K4me3-only	H3K4me3-only	H3K4me3-only
NM_000295	SERPINA1	chr14	94843083	94855153	-	Unmarked	Unmarked	Unmarked	Unmarked	Unmarked	Unmarked	H3K4me3-only	H3K4me3-only	Unmarked	Unmarked	Unmarked	H3K4me3-only	Unmarked	Unmarked	Unmarked	Unmarked	Unmarked	Unmarked	Unmarked	Unmarked
NM_000296	PKD1	chr16	2138710	2185899	-	H3K4me3-only	H3K4me3-only	H3K4me3-only	H3K4me3-only	H3K4me3-only	H3K4me3-only	Unmarked	Unmarked	H3K4me3-only	H3K4me3-only	H3K4me3-only	H3K4me3-only	H3K4me3-only	H3K4me3-only	Unmarked	H3K4me3-only	H3K4me3-only	H3K4me3-only	H3K4me3-only	H3K4me3-only
NM_000297	PKD2	chr4	88928798	88998931	+	Bivalent	Bivalent	H3K4me3-only	H3K4me3-only	H3K4me3-only	H3K4me3-only	H3K4me3-only	H3K4me3-only	H3K4me3-only	H3K4me3-only	H3K4me3-only	H3K4me3-only	H3K4me3-only	H3K4me3-only	H3K4me3-only	H3K4me3-only	H3K4me3-only	H3K4me3-only	H3K4me3-only	H3K4me3-only
NM_000298	PKLR	chr1	155259083	155271225	-	Unmarked	Unmarked	H3K27me3-only	H3K27me3-only	H3K4me3-only	Unmarked	Unmarked	Unmarked	Unmarked	Unmarked	Unmarked	Unmarked	Unmarked	Unmarked	Unmarked	Unmarked	Unmarked	Unmarked	Unmarked	Unmarked
NM_000299	PKP1	chr1	201252579	201302121	+	H3K27me3-only	Bivalent	Bivalent	Bivalent	Bivalent	Bivalent	H3K27me3-only	H3K27me3-only	H3K4me3-only	H3K4me3-only	H3K27me3-only	H3K4me3-only	H3K4me3-only	H3K27me3-only	H3K27me3-only	Unmarked	H3K4me3-only	Unmarked	H3K4me3-only	Unmarked
NM_000301	PLG	chr6	161123224	161175085	+	Unmarked	Unmarked	Unmarked	Unmarked	Unmarked	Unmarked	Unmarked	Unmarked	Unmarked	Unmarked	Unmarked	Unmarked	Unmarked	Unmarked	Unmarked	Unmarked	Unmarked	Unmarked	Unmarked	Unmarked
NM_000302	PLOD1	chr1	11994723	12035599	+	H3K4me3-only	H3K4me3-only	H3K4me3-only	H3K4me3-only	H3K4me3-only	H3K4me3-only	H3K4me3-only	H3K4me3-only	H3K4me3-only	H3K4me3-only	H3K4me3-only	H3K4me3-only	H3K4me3-only	H3K4me3-only	H3K4me3-only	H3K4me3-only	H3K4me3-only	H3K4me3-only	H3K4me3-only	H3K4me3-only
NM_000303	PMM2	chr16	8891669	8943194	+	H3K4me3-only	H3K4me3-only	H3K4me3-only	H3K4me3-only	H3K4me3-only	H3K4me3-only	H3K4me3-only	H3K4me3-only	H3K4me3-only	H3K4me3-only	H3K4me3-only	H3K4me3-only	H3K4me3-only	H3K4me3-only	H3K4me3-only	H3K4me3-only	H3K4me3-only	H3K4me3-only	H3K4me3-only	H3K4me3-only
NM_000304	PMP22	chr17	15133096	15168644	-	H3K27me3-only	H3K27me3-only	H3K27me3-only	H3K27me3-only	Unmarked	H3K27me3-only	H3K4me3-only	H3K4me3-only	H3K27me3-only	Unmarked	H3K27me3-only	Unmarked	Unmarked	H3K4me3-only	Unmarked	Unmarked	Unmarked	H3K4me3-only	Unmarked	Unmarked
NM_000307	POU3F4	chrX	82763268	82764775	+	Bivalent	Bivalent	Bivalent	Unmarked	Unmarked	Bivalent	H3K27me3-only	H3K27me3-only	H3K27me3-only	H3K27me3-only	H3K27me3-only	H3K27me3-only	H3K27me3-only	Unmarked	Unmarked	Unmarked	Unmarked	Unmarked	Unmarked	Unmarked
NM_000309	PPOX	chr1	161136180	161141010	+	H3K4me3-only	H3K4me3-only	H3K4me3-only	H3K4me3-only	H3K4me3-only	H3K4me3-only	H3K4me3-only	H3K4me3-only	H3K4me3-only	H3K4me3-only	H3K4me3-only	H3K4me3-only	H3K4me3-only	H3K4me3-only	H3K4me3-only	H3K4me3-only	H3K4me3-only	H3K4me3-only	H3K4me3-only	H3K4me3-only
NM_000310	PPT1	chr1	40538381	40563142	-	H3K4me3-only	H3K4me3-only	H3K4me3-only	H3K4me3-only	H3K4me3-only	H3K4me3-only	H3K4me3-only	H3K4me3-only	H3K4me3-only	H3K4me3-only	H3K4me3-only	H3K4me3-only	H3K4me3-only	H3K4me3-only	H3K4me3-only	H3K4me3-only	H3K4me3-only	H3K4me3-only	H3K4me3-only	H3K4me3-only
NM_000312	PROC	chr2	128175995	128186822	+	H3K27me3-only	H3K27me3-only	H3K27me3-only	H3K27me3-only	Bivalent	Unmarked	Unmarked	Unmarked	Unmarked	H3K27me3-only	Unmarked	Unmarked	Unmarked	H3K27me3-only	Unmarked	Unmarked	Unmarked	Unmarked	Unmarked	Unmarked
NM_000313	PROS1	chr3	93591880	93692934	-	Bivalent	Bivalent	H3K4me3-only	H3K4me3-only	H3K4me3-only	H3K4me3-only	H3K4me3-only	H3K4me3-only	H3K4me3-only	H3K4me3-only	H3K4me3-only	H3K4me3-only	H3K4me3-only	H3K4me3-only	H3K4me3-only	H3K4me3-only	H3K4me3-only	H3K4me3-only	H3K4me3-only	H3K4me3-only
NM_000314	PTEN	chr10	89623194	89728532	+	H3K4me3-only	H3K4me3-only	Bivalent	H3K4me3-only	H3K4me3-only	H3K4me3-only	H3K4me3-only	H3K4me3-only	H3K4me3-only	H3K4me3-only	H3K4me3-only	H3K4me3-only	H3K4me3-only	H3K4me3-only	H3K4me3-only	H3K4me3-only	H3K4me3-only	H3K4me3-only	H3K4me3-only	H3K4me3-only
NM_000315	PTH	chr11	13513600	13517567	-	Unmarked	Unmarked	Unmarked	Unmarked	Unmarked	Unmarked	Unmarked	Unmarked	H3K27me3-only	Unmarked	Unmarked	Unmarked	Unmarked	Unmarked	H3K27me3-only	Unmarked	Unmarked	Unmarked	Unmarked	Unmarked
NM_000316	PTH1R	chr3	46919235	46945289	+	H3K27me3-only	H3K27me3-only	H3K27me3-only	H3K27me3-only	H3K27me3-only	Unmarked	Unmarked	Unmarked	H3K27me3-only	Unmarked	Unmarked	Unmarked	Unmarked	H3K27me3-only	Unmarked	Unmarked	Unmarked	Unmarked	Unmarked	Unmarked
NM_000317	PTS	chr11	112097087	112104695	+	H3K4me3-only	H3K4me3-only	H3K4me3-only	H3K4me3-only	H3K4me3-only	H3K4me3-only	H3K4me3-only	H3K4me3-only	H3K4me3-only	H3K4me3-only	H3K4me3-only	H3K4me3-only	H3K4me3-only	H3K4me3-only	H3K4me3-only	H3K4me3-only	H3K4me3-only	H3K4me3-only	H3K4me3-only	H3K4me3-only
NM_000319	PEX5	chr12	7342957	7364079	+	H3K4me3-only	H3K4me3-only	H3K4me3-only	H3K4me3-only	H3K4me3-only	H3K4me3-only	H3K4me3-only	H3K4me3-only	H3K4me3-only	H3K4me3-only	H3K4me3-only	H3K4me3-only	H3K4me3-only	H3K4me3-only	H3K4me3-only	H3K4me3-only	H3K4me3-only	H3K4me3-only	H3K4me3-only	H3K4me3-only
NM_000320	QDPR	chr4	17488015	17513857	-	H3K4me3-only	Bivalent	H3K4me3-only	H3K4me3-only	H3K4me3-only	H3K4me3-only	H3K4me3-only	H3K4me3-only	H3K4me3-only	H3K4me3-only	H3K4me3-only	H3K4me3-only	H3K4me3-only	H3K4me3-only	H3K4me3-only	H3K4me3-only	H3K4me3-only	H3K4me3-only	H3K4me3-only	H3K4me3-only
NM_000321	RB1	chr13	48877882	49056026	+	H3K4me3-only	H3K4me3-only	H3K4me3-only	H3K4me3-only	H3K4me3-only	H3K4me3-only	H3K4me3-only	H3K4me3-only	H3K4me3-only	H3K4me3-only	H3K4me3-only	H3K4me3-only	H3K4me3-only	H3K4me3-only	H3K4me3-only	H3K4me3-only	H3K4me3-only	H3K4me3-only	H3K4me3-only	H3K4me3-only
NM_000322	PRPH2	chr6	42664332	42690358	-	Unmarked	Unmarked	Unmarked	Unmarked	Unmarked	Unmarked	Unmarked	Unmarked	Unmarked	Unmarked	Unmarked	Unmarked	Unmarked	Unmarked	Unmarked	Unmarked	Unmarked	Unmarked	Unmarked	Unmarked
NM_000324	RHAG	chr6	49572889	49604587	-	Unmarked	Unmarked	Unmarked	Unmarked	Unmarked	Unmarked	Unmarked	Unmarked	Unmarked	Unmarked	Unmarked	Unmarked	Unmarked	Unmarked	Unmarked	Unmarked	Unmarked	Unmarked	Unmarked	Unmarked
NM_000325	PITX2	chr4	111538579	111544254	-	Bivalent	Bivalent	Bivalent	Bivalent	Bivalent	Bivalent	Bivalent	Bivalent	Bivalent	Bivalent	Bivalent	Bivalent	Bivalent	Bivalent	Bivalent	Unmarked	H3K4me3-only	H3K4me3-only	H3K4me3-only	H3K4me3-only
NM_000326	RLBP1	chr15	89753097	89764922	-	Unmarked	Unmarked	Unmarked	H3K27me3-only	H3K27me3-only	Unmarked	Unmarked	Unmarked	Unmarked	Unmarked	Unmarked	Unmarked	Unmarked	H3K27me3-only	Unmarked	Unmarked	Unmarked	Unmarked	Unmarked	Unmarked
NM_000327	ROM1	chr11	62380212	62382592	+	H3K4me3-only	H3K4me3-only	H3K4me3-only	H3K4me3-only	H3K4me3-only	H3K4me3-only	H3K4me3-only	H3K4me3-only	H3K4me3-only	H3K4me3-only	H3K4me3-only	H3K4me3-only	H3K4me3-only	H3K4me3-only	H3K4me3-only	H3K4me3-only	H3K4me3-only	H3K4me3-only	H3K4me3-only	H3K4me3-only
NM_000329	RPE65	chr1	68894506	68915642	-	Unmarked	Unmarked	Unmarked	Unmarked	Unmarked	Unmarked	Unmarked	Unmarked	Unmarked	Unmarked	Unmarked	Unmarked	Unmarked	Unmarked	Unmarked	Unmarked	Unmarked	Unmarked	Unmarked	Unmarked
NM_000330	RS1	chrX	18657807	18690223	-	Unmarked	Unmarked	Unmarked	Unmarked	Unmarked	Unmarked	Unmarked	Unmarked	Unmarked	Unmarked	Unmarked	Unmarked	H3K27me3-only	Unmarked	Unmarked	Unmarked	Unmarked	Unmarked	Unmarked	Unmarked
NM_000332	ATXN1	chr6	16299342	16761721	-	Bivalent	Bivalent	Bivalent	H3K4me3-only	H3K4me3-only	H3K4me3-only	H3K4me3-only	H3K4me3-only	H3K4me3-only	H3K4me3-only	H3K4me3-only	H3K4me3-only	H3K4me3-only	H3K4me3-only	H3K4me3-only	H3K4me3-only	H3K4me3-only	H3K4me3-only	H3K4me3-only	H3K4me3-only
NM_000333	ATXN7	chr3	63850232	63989136	+	H3K4me3-only	H3K4me3-only	H3K4me3-only	H3K4me3-only	H3K4me3-only	H3K4me3-only	H3K4me3-only	H3K4me3-only	H3K4me3-only	H3K4me3-only	H3K4me3-only	H3K4me3-only	H3K4me3-only	H3K4me3-only	H3K4me3-only	H3K4me3-only	H3K4me3-only	H3K4me3-only	H3K4me3-only	H3K4me3-only
NM_000334	SCN4A	chr17	62015913	62050278	-	Unmarked	Unmarked	H3K27me3-only	H3K27me3-only	H3K27me3-only	Unmarked	Unmarked	Unmarked	Unmarked	Unmarked	Unmarked	Unmarked	Unmarked	Unmarked	Unmarked	Unmarked	Unmarked	Unmarked	Unmarked	Unmarked
NM_000336	SCNN1B	chr16	23313590	23392620	+	Bivalent	Bivalent	Bivalent	Bivalent	Bivalent	H3K27me3-only	H3K27me3-only	H3K27me3-only	Bivalent	H3K27me3-only	H3K27me3-only	Bivalent	H3K4me3-only	H3K27me3-only	H3K27me3-only	H3K4me3-only	H3K4me3-only	Unmarked	H3K4me3-only	H3K4me3-only
NM_000338	SLC12A1	chr15	48498497	48596275	+	Unmarked	Unmarked	Unmarked	Unmarked	Unmarked	Unmarked	Unmarked	Unmarked	H3K27me3-only	Unmarked	Unmarked	Unmarked	Unmarked	Unmarked	Unmarked	Unmarked	Unmarked	Unmarked	Unmarked	Unmarked
NM_000340	SLC2A2	chr3	170714136	170744768	-	Unmarked	Unmarked	Unmarked	Unmarked	Unmarked	Unmarked	H3K4me3-only	H3K4me3-only	Unmarked	Unmarked	H3K27me3-only	Unmarked	Unmarked	Unmarked	Unmarked	H3K4me3-only	Unmarked	Unmarked	Unmarked	Unmarked
NM_000341	SLC3A1	chr2	44502596	44547962	+	Unmarked	Unmarked	Unmarked	Unmarked	Unmarked	Unmarked	H3K4me3-only	H3K4me3-only	Unmarked	Unmarked	Unmarked	Unmarked	Unmarked	Unmarked	Unmarked	Unmarked	Unmarked	Unmarked	Unmarked	H3K4me3-only
NM_000342	SLC4A1	chr17	42325757	42345502	-	Unmarked	Unmarked	H3K27me3-only	H3K27me3-only	Bivalent	Unmarked	H3K27me3-only	Unmarked	Unmarked	Unmarked	Unmarked	Unmarked	Unmarked	H3K27me3-only	Unmarked	Unmarked	Unmarked	Unmarked	Unmarked	Unmarked
NM_000343	SLC5A1	chr22	32439018	32509011	+	Unmarked	Unmarked	H3K27me3-only	H3K27me3-only	H3K27me3-only	H3K27me3-only	H3K4me3-only	H3K4me3-only	H3K27me3-only	H3K27me3-only	H3K27me3-only	Unmarked	Unmarked	H3K27me3-only	H3K27me3-only	H3K4me3-only	H3K4me3-only	Unmarked	Unmarked	Unmarked
NM_000345	SNCA	chr4	90645249	90758350	-	H3K4me3-only	Bivalent	H3K4me3-only	Bivalent	Bivalent	H3K4me3-only	Bivalent	Bivalent	H3K4me3-only	H3K4me3-only	Bivalent	H3K4me3-only	H3K4me3-only	Bivalent	H3K4me3-only	H3K4me3-only	H3K4me3-only	H3K4me3-only	H3K4me3-only	H3K4me3-only
NM_000346	SOX9	chr17	70117160	70122560	+	Bivalent	Bivalent	Bivalent	H3K4me3-only	H3K4me3-only	Bivalent	Bivalent	Bivalent	H3K4me3-only	Bivalent	H3K27me3-only	H3K4me3-only	H3K4me3-only	Bivalent	H3K27me3-only	H3K4me3-only	H3K4me3-only	H3K4me3-only	H3K4me3-only	H3K4me3-only
NM_000348	SRD5A2	chr2	31749655	31806040	-	Bivalent	Bivalent	H3K27me3-only	Bivalent	Bivalent	H3K27me3-only	H3K27me3-only	H3K27me3-only	Bivalent	H3K27me3-only	H3K27me3-only	Bivalent	Bivalent	H3K27me3-only	Unmarked	Unmarked	Unmarked	Unmarked	Unmarked	Unmarked
NM_000349	STAR	chr8	38000217	38008600	-	H3K4me3-only	H3K4me3-only	H3K4me3-only	H3K4me3-only	H3K4me3-only	H3K4me3-only	H3K4me3-only	H3K4me3-only	Unmarked	H3K4me3-only	H3K4me3-only	Unmarked	H3K4me3-only	H3K4me3-only	H3K4me3-only	Unmarked	Unmarked	Unmarked	Unmarked	Unmarked
NM_000350	ABCA4	chr1	94458393	94586705	-	Unmarked	Unmarked	Unmarked	H3K27me3-only	H3K27me3-only	Unmarked	Unmarked	Unmarked	Unmarked	Unmarked	Unmarked	Unmarked	Unmarked	Unmarked	Unmarked	Unmarked	Unmarked	Unmarked	Unmarked	Unmarked
NM_000351	STS	chrX	7137471	7272682	+	Unmarked	Unmarked	Unmarked	Unmarked	Unmarked	Unmarked	Unmarked	Unmarked	Unmarked	Unmarked	Unmarked	Unmarked	Unmarked	Unmarked	Unmarked	Unmarked	Unmarked	Unmarked	Unmarked	Unmarked
NM_000352	ABCC8	chr11	17414431	17498449	-	Bivalent	Bivalent	Bivalent	Bivalent	H3K27me3-only	Bivalent	H3K27me3-only	H3K27me3-only	H3K27me3-only	H3K27me3-only	H3K27me3-only	Bivalent	Bivalent	H3K27me3-only	H3K27me3-only	H3K4me3-only	Unmarked	H3K4me3-only	H3K4me3-only	H3K4me3-only
NM_000353	TAT	chr16	71600753	71610998	-	Unmarked	Unmarked	Unmarked	Unmarked	Unmarked	Unmarked	Unmarked	Unmarked	Unmarked	Unmarked	Unmarked	Unmarked	Unmarked	H3K27me3-only	Unmarked	Unmarked	Unmarked	Unmarked	Unmarked	Unmarked
NM_000354	SERPINA7	chrX	105277189	105282718	-	Unmarked	Unmarked	Unmarked	Unmarked	Unmarked	Unmarked	Unmarked	Unmarked	Unmarked	Unmarked	Unmarked	H3K27me3-only	H3K27me3-only	Unmarked	Unmarked	Unmarked	Unmarked	Unmarked	Unmarked	Unmarked
NM_000355	TCN2	chr22	31003069	31023047	+	H3K4me3-only	H3K4me3-only	H3K4me3-only	H3K4me3-only	H3K4me3-only	H3K4me3-only	H3K4me3-only	H3K4me3-only	H3K4me3-only	H3K4me3-only	H3K4me3-only	H3K4me3-only	H3K4me3-only	H3K4me3-only	H3K4me3-only	H3K4me3-only	H3K4me3-only	H3K4me3-only	H3K4me3-only	H3K4me3-only
NM_000356	TCOF1	chr5	149737201	149779871	+	H3K4me3-only	H3K4me3-only	H3K4me3-only	H3K4me3-only	H3K4me3-only	H3K4me3-only	H3K4me3-only	H3K4me3-only	H3K4me3-only	H3K4me3-only	H3K4me3-only	H3K4me3-only	H3K4me3-only	H3K4me3-only	H3K4me3-only	H3K4me3-only	H3K4me3-only	H3K4me3-only	H3K4me3-only	H3K4me3-only
NM_000358	TGFBI	chr5	135364583	135399507	+	Bivalent	Bivalent	Bivalent	Bivalent	H3K4me3-only	Bivalent	Bivalent	Bivalent	H3K4me3-only	Bivalent	H3K4me3-only	H3K4me3-only	H3K4me3-only	H3K4me3-only	H3K4me3-only	Unmarked	H3K4me3-only	H3K4me3-only	H3K4me3-only	H3K4me3-only
NM_000359	TGM1	chr14	24718319	24732416	-	Unmarked	Unmarked	Unmarked	Unmarked	Unmarked	Unmarked	Unmarked	Unmarked	Unmarked	H3K4me3-only	Unmarked	Unmarked	Unmarked	Unmarked	Unmarked	Unmarked	H3K4me3-only	Unmarked	Unmarked	Unmarked
NM_000361	THBD	chr20	23026269	23030301	-	Bivalent	Bivalent	Bivalent	Bivalent	Bivalent	Bivalent	Bivalent	Bivalent	H3K4me3-only	H3K4me3-only	Bivalent	H3K4me3-only	Bivalent	H3K4me3-only	H3K4me3-only	H3K4me3-only	H3K4me3-only	H3K4me3-only	H3K4me3-only	H3K4me3-only
NM_000362	TIMP3	chr22	33196801	33259028	+	H3K27me3-only	Unmarked	H3K27me3-only	H3K4me3-only	Unmarked	Unmarked	Unmarked	Unmarked	Unmarked	Unmarked	H3K27me3-only	Unmarked	H3K4me3-only	Unmarked	Unmarked	Unmarked	Unmarked	Unmarked	Unmarked	Unmarked
NM_000363	TNNI3	chr19	55663135	55669100	-	Unmarked	Unmarked	H3K27me3-only	Bivalent	Bivalent	H3K27me3-only	H3K27me3-only	H3K27me3-only	Unmarked	Unmarked	H3K27me3-only	Unmarked	H3K27me3-only	H3K27me3-only	Unmarked	Unmarked	Unmarked	H3K4me3-only	Unmarked	Unmarked
NM_000364	TNNT2	chr1	201328135	201346828	-	Unmarked	Unmarked	H3K27me3-only	H3K27me3-only	H3K27me3-only	Unmarked	Unmarked	Unmarked	H3K27me3-only	H3K27me3-only	Unmarked	Unmarked	Unmarked	H3K27me3-only	Unmarked	Unmarked	Unmarked	H3K4me3-only	Unmarked	Unmarked
NM_000365	TPI1	chr12	6976692	6980110	+	H3K4me3-only	H3K4me3-only	H3K4me3-only	H3K4me3-only	H3K4me3-only	H3K4me3-only	H3K4me3-only	H3K4me3-only	H3K4me3-only	H3K4me3-only	H3K4me3-only	H3K4me3-only	H3K4me3-only	H3K4me3-only	H3K4me3-only	H3K4me3-only	H3K4me3-only	H3K4me3-only	H3K4me3-only	H3K4me3-only
NM_000367	TPMT	chr6	18128544	18155374	-	H3K4me3-only	H3K4me3-only	H3K4me3-only	H3K4me3-only	H3K4me3-only	H3K4me3-only	H3K4me3-only	H3K4me3-only	H3K4me3-only	H3K4me3-only	H3K4me3-only	H3K4me3-only	H3K4me3-only	H3K4me3-only	H3K4me3-only	H3K4me3-only	H3K4me3-only	H3K4me3-only	H3K4me3-only	H3K4me3-only
NM_000370	TTPA	chr8	63972047	63998612	-	Bivalent	Bivalent	H3K4me3-only	Bivalent	Bivalent	Bivalent	Bivalent	H3K4me3-only	Bivalent	H3K4me3-only	Bivalent	Bivalent	H3K4me3-only	H3K4me3-only	Bivalent	H3K4me3-only	H3K4me3-only	H3K4me3-only	H3K4me3-only	H3K4me3-only
NM_000371	TTR	chr18	29171729	29178986	+	Unmarked	Unmarked	Unmarked	Unmarked	Unmarked	Unmarked	H3K4me3-only	H3K4me3-only	Unmarked	Unmarked	Unmarked	H3K27me3-only	Unmarked	Unmarked	Unmarked	H3K4me3-only	Unmarked	Unmarked	Unmarked	Unmarked
NM_000372	TYR	chr11	88911039	89028927	+	Unmarked	Unmarked	Unmarked	Unmarked	Unmarked	Unmarked	Unmarked	Unmarked	Unmarked	H3K4me3-only	Unmarked	Unmarked	Unmarked	Unmarked	Unmarked	Unmarked	Unmarked	Unmarked	Unmarked	Unmarked
NM_000373	UMPS	chr3	124449212	124468119	+	H3K4me3-only	H3K4me3-only	H3K4me3-only	H3K4me3-only	H3K4me3-only	H3K4me3-only	H3K4me3-only	H3K4me3-only	H3K4me3-only	H3K4me3-only	H3K4me3-only	H3K4me3-only	H3K4me3-only	H3K4me3-only	H3K4me3-only	H3K4me3-only	H3K4me3-only	H3K4me3-only	H3K4me3-only	H3K4me3-only
NM_000375	UROS	chr10	127477146	127511837	-	H3K4me3-only	H3K4me3-only	H3K4me3-only	H3K4me3-only	H3K4me3-only	H3K4me3-only	H3K4me3-only	H3K4me3-only	H3K4me3-only	H3K4me3-only	H3K4me3-only	H3K4me3-only	H3K4me3-only	H3K4me3-only	H3K4me3-only	H3K4me3-only	H3K4me3-only	H3K4me3-only	H3K4me3-only	H3K4me3-only
NM_000376	VDR	chr12	48235319	48298814	-	Bivalent	Bivalent	Bivalent	Bivalent	Bivalent	Bivalent	H3K4me3-only	Bivalent	H3K4me3-only	H3K4me3-only	H3K4me3-only	H3K4me3-only	H3K4me3-only	Bivalent	Bivalent	H3K4me3-only	H3K4me3-only	H3K4me3-only	H3K4me3-only	H3K4me3-only
NM_000377	WAS	chrX	48542185	48549817	+	Unmarked	Unmarked	Unmarked	H3K27me3-only	H3K27me3-only	H3K4me3-only	Unmarked	Unmarked	Unmarked	Unmarked	H3K4me3-only	Unmarked	H3K27me3-only	H3K27me3-only	Unmarked	Unmarked	H3K4me3-only	Unmarked	Unmarked	Unmarked
NM_000379	XDH	chr2	31557187	31637611	-	Unmarked	Unmarked	Unmarked	Unmarked	H3K4me3-only	Unmarked	H3K4me3-only	H3K4me3-only	H3K4me3-only	Unmarked	Unmarked	H3K4me3-only	Unmarked	Unmarked	Unmarked	H3K4me3-only	Unmarked	Unmarked	Unmarked	Unmarked
NM_000380	XPA	chr9	100437190	100459691	-	Bivalent	Bivalent	H3K4me3-only	H3K4me3-only	H3K4me3-only	H3K4me3-only	H3K4me3-only	H3K4me3-only	H3K4me3-only	H3K4me3-only	H3K4me3-only	H3K4me3-only	H3K4me3-only	H3K4me3-only	H3K4me3-only	H3K4me3-only	H3K4me3-only	H3K4me3-only	H3K4me3-only	H3K4me3-only
NM_000382	ALDH3A2	chr17	19552063	19580908	+	H3K4me3-only	H3K4me3-only	Bivalent	H3K4me3-only	H3K4me3-only	H3K4me3-only	H3K4me3-only	H3K4me3-only	H3K4me3-only	H3K4me3-only	H3K4me3-only	H3K4me3-only	H3K4me3-only	H3K4me3-only	H3K4me3-only	H3K4me3-only	H3K4me3-only	H3K4me3-only	H3K4me3-only	H3K4me3-only
NM_000383	AIRE	chr21	45705720	45718102	+	Bivalent	Bivalent	Bivalent	Bivalent	Bivalent	Unmarked	Bivalent	Bivalent	H3K27me3-only	H3K27me3-only	Unmarked	H3K27me3-only	Bivalent	H3K27me3-only	Unmarked	Unmarked	Unmarked	Unmarked	Unmarked	Unmarked
NM_000384	APOB	chr2	21224300	21266945	-	Bivalent	Bivalent	Bivalent	Unmarked	Unmarked	Bivalent	H3K4me3-only	H3K4me3-only	H3K27me3-only	H3K27me3-only	Unmarked	H3K27me3-only	H3K4me3-only	Unmarked	Unmarked	Unmarked	Unmarked	Unmarked	Unmarked	Unmarked
NM_000386	BLMH	chr17	28575212	28619184	-	H3K4me3-only	H3K4me3-only	H3K4me3-only	H3K4me3-only	H3K4me3-only	H3K4me3-only	H3K4me3-only	H3K4me3-only	Bivalent	H3K4me3-only	H3K4me3-only	Bivalent	H3K4me3-only	H3K4me3-only	H3K4me3-only	H3K4me3-only	H3K4me3-only	H3K4me3-only	H3K4me3-only	H3K4me3-only
NM_000387	SLC25A20	chr3	48894355	48936426	-	H3K4me3-only	H3K4me3-only	H3K4me3-only	H3K4me3-only	H3K4me3-only	H3K4me3-only	H3K4me3-only	H3K4me3-only	H3K4me3-only	H3K4me3-only	H3K4me3-only	H3K4me3-only	H3K4me3-only	H3K4me3-only	H3K4me3-only	H3K4me3-only	H3K4me3-only	H3K4me3-only	H3K4me3-only	H3K4me3-only
NM_000388	CASR	chr3	121902529	122005344	+	Bivalent	Bivalent	H3K27me3-only	H3K27me3-only	H3K27me3-only	Bivalent	Bivalent	Bivalent	Bivalent	H3K27me3-only	H3K27me3-only	Bivalent	H3K27me3-only	H3K27me3-only	H3K27me3-only	H3K4me3-only	Unmarked	Unmarked	Unmarked	H3K4me3-only
NM_000389	CDKN1A	chr6	36646455	36655116	+	Bivalent	Bivalent	Bivalent	Bivalent	H3K4me3-only	Bivalent	H3K4me3-only	H3K4me3-only	H3K4me3-only	H3K4me3-only	H3K4me3-only	H3K4me3-only	H3K4me3-only	H3K4me3-only	H3K4me3-only	H3K4me3-only	H3K4me3-only	H3K4me3-only	H3K4me3-only	H3K4me3-only
NM_000391	TPP1	chr11	6633996	6640692	-	H3K4me3-only	H3K4me3-only	H3K4me3-only	H3K4me3-only	H3K4me3-only	H3K4me3-only	H3K4me3-only	H3K4me3-only	H3K4me3-only	H3K4me3-only	H3K4me3-only	H3K4me3-only	H3K4me3-only	H3K4me3-only	H3K4me3-only	H3K4me3-only	H3K4me3-only	H3K4me3-only	H3K4me3-only	H3K4me3-only
NM_000392	ABCC2	chr10	101542462	101611662	+	Unmarked	Unmarked	Unmarked	Unmarked	Unmarked	Unmarked	H3K4me3-only	H3K4me3-only	Unmarked	H3K4me3-only	Unmarked	Unmarked	Unmarked	Unmarked	Unmarked	Unmarked	Unmarked	Unmarked	Unmarked	Unmarked
NM_000393	COL5A2	chr2	189896640	190044605	-	H3K4me3-only	H3K4me3-only	H3K4me3-only	H3K4me3-only	H3K4me3-only	H3K27me3-only	H3K4me3-only	H3K4me3-only	H3K4me3-only	H3K4me3-only	Unmarked	H3K4me3-only	H3K4me3-only	H3K4me3-only	H3K4me3-only	H3K4me3-only	H3K4me3-only	H3K4me3-only	Unmarked	Unmarked
NM_000394	CRYAA	chr21	44589140	44592913	+	Unmarked	Unmarked	Unmarked	H3K27me3-only	Bivalent	Unmarked	Unmarked	Unmarked	Unmarked	Unmarked	Unmarked	Unmarked	Unmarked	Unmarked	Unmarked	Unmarked	Unmarked	Unmarked	Unmarked	Unmarked
NM_000395	CSF2RB	chr22	37309674	37336479	+	H3K27me3-only	H3K27me3-only	Unmarked	H3K27me3-only	Unmarked	H3K4me3-only	Unmarked	Unmarked	Unmarked	H3K27me3-only	H3K4me3-only	Unmarked	Unmarked	H3K27me3-only	H3K4me3-only	Unmarked	Unmarked	Unmarked	Unmarked	Unmarked
NM_000396	CTSK	chr1	150768683	150780917	-	Unmarked	Unmarked	Unmarked	H3K4me3-only	H3K4me3-only	Unmarked	Unmarked	Unmarked	H3K4me3-only	H3K4me3-only	Unmarked	Unmarked	H3K4me3-only	H3K4me3-only	Unmarked	Unmarked	H3K4me3-only	Unmarked	Unmarked	Unmarked
NM_000397	CYBB	chrX	37639269	37672714	+	Unmarked	Unmarked	Unmarked	Unmarked	Unmarked	Unmarked	Unmarked	Unmarked	Unmarked	Unmarked	H3K4me3-only	Unmarked	Unmarked	Unmarked	Unmarked	Unmarked	Unmarked	Unmarked	Unmarked	Unmarked
NM_000398	CYB5R3	chr22	43013845	43045405	-	H3K4me3-only	H3K4me3-only	H3K4me3-only	H3K4me3-only	H3K4me3-only	H3K4me3-only	H3K4me3-only	H3K4me3-only	H3K4me3-only	H3K4me3-only	H3K4me3-only	H3K4me3-only	H3K4me3-only	H3K4me3-only	H3K4me3-only	H3K4me3-only	H3K4me3-only	H3K4me3-only	H3K4me3-only	H3K4me3-only
NM_000400	ERCC2	chr19	45854648	45873845	-	H3K4me3-only	H3K4me3-only	H3K4me3-only	H3K4me3-only	H3K4me3-only	H3K4me3-only	H3K4me3-only	H3K4me3-only	H3K4me3-only	H3K4me3-only	H3K4me3-only	H3K4me3-only	H3K4me3-only	H3K4me3-only	H3K4me3-only	H3K4me3-only	H3K4me3-only	H3K4me3-only	H3K4me3-only	H3K4me3-only
NM_000401	EXT2	chr11	44117746	44266980	+	H3K4me3-only	H3K4me3-only	H3K4me3-only	H3K4me3-only	H3K4me3-only	H3K4me3-only	H3K4me3-only	H3K4me3-only	H3K4me3-only	H3K4me3-only	H3K4me3-only	H3K4me3-only	H3K4me3-only	H3K4me3-only	H3K4me3-only	H3K4me3-only	H3K4me3-only	H3K4me3-only	H3K4me3-only	H3K4me3-only
NM_000402	G6PD	chrX	153759605	153775233	-	H3K4me3-only	H3K4me3-only	H3K4me3-only	H3K4me3-only	H3K4me3-only	H3K4me3-only	H3K4me3-only	H3K4me3-only	H3K4me3-only	H3K4me3-only	H3K4me3-only	H3K4me3-only	H3K4me3-only	H3K4me3-only	H3K4me3-only	H3K4me3-only	H3K4me3-only	H3K4me3-only	H3K4me3-only	H3K4me3-only
NM_000403	GALE	chr1	24122088	24127034	-	H3K4me3-only	H3K4me3-only	Bivalent	H3K4me3-only	H3K4me3-only	H3K4me3-only	H3K4me3-only	H3K4me3-only	H3K4me3-only	H3K4me3-only	H3K4me3-only	H3K4me3-only	H3K4me3-only	H3K4me3-only	H3K4me3-only	H3K4me3-only	H3K4me3-only	H3K4me3-only	H3K4me3-only	H3K4me3-only
NM_000404	GLB1	chr3	33038099	33138694	-	H3K4me3-only	H3K4me3-only	H3K4me3-only	H3K4me3-only	H3K4me3-only	H3K4me3-only	H3K4me3-only	H3K4me3-only	H3K4me3-only	H3K4me3-only	H3K4me3-only	H3K4me3-only	H3K4me3-only	H3K4me3-only	H3K4me3-only	H3K4me3-only	H3K4me3-only	H3K4me3-only	H3K4me3-only	H3K4me3-only
NM_000405	GM2A	chr5	150632612	150649953	+	H3K4me3-only	H3K4me3-only	H3K4me3-only	H3K4me3-only	H3K4me3-only	H3K4me3-only	H3K4me3-only	H3K4me3-only	H3K4me3-only	H3K4me3-only	H3K4me3-only	H3K4me3-only	H3K4me3-only	H3K4me3-only	H3K4me3-only	H3K4me3-only	H3K4me3-only	H3K4me3-only	H3K4me3-only	H3K4me3-only
NM_000407	GP1BB	chr22	19711065	19712297	+	H3K27me3-only	Bivalent	Bivalent	H3K27me3-only	Bivalent	Bivalent	H3K27me3-only	H3K27me3-only	Bivalent	Bivalent	Bivalent	Unmarked	Unmarked	Unmarked	H3K4me3-only	Unmarked	H3K4me3-only	Unmarked	Unmarked	H3K4me3-only
NM_000408	GPD2	chr2	157292899	157442915	+	H3K4me3-only	H3K4me3-only	Bivalent	H3K4me3-only	H3K4me3-only	H3K4me3-only	H3K4me3-only	H3K4me3-only	H3K4me3-only	H3K4me3-only	H3K4me3-only	H3K4me3-only	H3K4me3-only	H3K4me3-only	H3K4me3-only	H3K4me3-only	H3K4me3-only	H3K4me3-only	H3K4me3-only	H3K4me3-only
NM_000409	GUCA1A	chr6	42123143	42147794	+	Unmarked	Unmarked	Unmarked	H3K27me3-only	H3K27me3-only	Unmarked	Unmarked	Unmarked	Unmarked	Unmarked	Unmarked	Unmarked	Unmarked	H3K27me3-only	Unmarked	Unmarked	Unmarked	Unmarked	Unmarked	Unmarked
NM_000411	HLCS	chr21	38123188	38362545	-	H3K4me3-only	H3K4me3-only	H3K4me3-only	H3K4me3-only	H3K4me3-only	H3K4me3-only	H3K4me3-only	H3K4me3-only	H3K4me3-only	H3K4me3-only	H3K4me3-only	H3K4me3-only	H3K4me3-only	H3K4me3-only	H3K4me3-only	H3K4me3-only	H3K4me3-only	H3K4me3-only	H3K4me3-only	H3K4me3-only
NM_000412	HRG	chr3	186383797	186396023	+	Unmarked	Unmarked	Unmarked	H3K27me3-only	Unmarked	Unmarked	Unmarked	Unmarked	Unmarked	Unmarked	Unmarked	Unmarked	Unmarked	H3K27me3-only	Unmarked	Unmarked	Unmarked	Unmarked	Unmarked	Unmarked
NM_000413	HSD17B1	chr17	40703983	40707232	+	Unmarked	Unmarked	Unmarked	Unmarked	H3K4me3-only	Unmarked	Unmarked	Unmarked	Unmarked	Unmarked	Unmarked	Unmarked	Unmarked	Unmarked	Unmarked	Unmarked	Unmarked	Unmarked	Unmarked	Unmarked
NM_000414	HSD17B4	chr5	118788137	118878030	+	H3K4me3-only	H3K4me3-only	H3K4me3-only	H3K4me3-only	H3K4me3-only	H3K4me3-only	H3K4me3-only	H3K4me3-only	H3K4me3-only	H3K4me3-only	H3K4me3-only	H3K4me3-only	H3K4me3-only	H3K4me3-only	H3K4me3-only	H3K4me3-only	H3K4me3-only	H3K4me3-only	H3K4me3-only	H3K4me3-only
NM_000415	IAPP	chr12	21525801	21532914	+	Unmarked	Unmarked	Unmarked	Unmarked	Unmarked	Unmarked	Unmarked	Unmarked	Unmarked	Unmarked	Unmarked	Unmarked	Unmarked	Unmarked	Unmarked	H3K4me3-only	Unmarked	Unmarked	Unmarked	Unmarked
NM_000416	IFNGR1	chr6	137518620	137540567	-	H3K4me3-only	H3K4me3-only	H3K4me3-only	H3K4me3-only	H3K4me3-only	H3K4me3-only	H3K4me3-only	H3K4me3-only	H3K4me3-only	H3K4me3-only	H3K4me3-only	H3K4me3-only	H3K4me3-only	H3K4me3-only	H3K4me3-only	H3K4me3-only	H3K4me3-only	H3K4me3-only	H3K4me3-only	H3K4me3-only
NM_000417	IL2RA	chr10	6052656	6104333	-	Unmarked	Unmarked	Unmarked	Unmarked	Unmarked	H3K4me3-only	Unmarked	Unmarked	H3K27me3-only	Unmarked	H3K4me3-only	Unmarked	Unmarked	Unmarked	Unmarked	Unmarked	Unmarked	Unmarked	Unmarked	Unmarked
NM_000419	ITGA2B	chr17	42449549	42466873	-	Unmarked	Unmarked	Unmarked	H3K27me3-only	Unmarked	H3K4me3-only	Unmarked	Unmarked	Unmarked	Unmarked	Unmarked	Unmarked	Unmarked	Unmarked	Unmarked	Unmarked	Unmarked	Unmarked	Unmarked	Unmarked
NM_000420	KEL	chr7	142638200	142659503	-	Unmarked	Unmarked	H3K27me3-only	Unmarked	Unmarked	Unmarked	H3K4me3-only	H3K4me3-only	Unmarked	Unmarked	Unmarked	Unmarked	Unmarked	Unmarked	Unmarked	Unmarked	Unmarked	Unmarked	Unmarked	Unmarked
NM_000421	KRT10	chr17	38974368	38978863	-	Unmarked	H3K27me3-only	Unmarked	H3K4me3-only	Unmarked	Unmarked	Unmarked	Unmarked	Unmarked	Unmarked	Unmarked	Unmarked	Unmarked	Unmarked	Unmarked	Unmarked	Unmarked	Unmarked	Unmarked	Unmarked
NM_000422	KRT17	chr17	39775691	39780882	-	Unmarked	Unmarked	Unmarked	H3K27me3-only	H3K27me3-only	Unmarked	Unmarked	Unmarked	H3K4me3-only	H3K27me3-only	Unmarked	H3K4me3-only	H3K4me3-only	Unmarked	Unmarked	Unmarked	Unmarked	Unmarked	Unmarked	Unmarked
NM_000423	KRT2	chr12	53038341	53045959	-	Unmarked	Unmarked	Unmarked	H3K27me3-only	H3K27me3-only	Unmarked	Unmarked	Unmarked	H3K27me3-only	H3K27me3-only	Unmarked	Unmarked	Unmarked	H3K27me3-only	Unmarked	Unmarked	Unmarked	Unmarked	Unmarked	Unmarked
NM_000424	KRT5	chr12	52908358	52914243	-	Unmarked	Unmarked	Unmarked	H3K27me3-only	H3K27me3-only	Unmarked	H3K27me3-only	Unmarked	H3K4me3-only	H3K27me3-only	Unmarked	H3K4me3-only	H3K4me3-only	Unmarked	Unmarked	Unmarked	H3K4me3-only	Unmarked	Unmarked	Unmarked
NM_000425	L1CAM	chrX	153126968	153141500	-	Unmarked	Unmarked	H3K4me3-only	H3K27me3-only	H3K27me3-only	H3K27me3-only	Unmarked	Unmarked	Unmarked	Unmarked	Unmarked	Unmarked	H3K27me3-only	Unmarked	Unmarked	H3K4me3-only	Unmarked	Unmarked	Unmarked	Unmarked
NM_000427	LOR	chr1	153232178	153234600	+	H3K27me3-only	H3K27me3-only	H3K27me3-only	H3K27me3-only	H3K27me3-only	H3K27me3-only	H3K27me3-only	H3K27me3-only	H3K27me3-only	H3K27me3-only	H3K27me3-only	H3K27me3-only	Unmarked	H3K27me3-only	H3K27me3-only	Unmarked	Unmarked	Unmarked	Unmarked	Unmarked
NM_000428	LTBP2	chr14	74964885	75079034	-	Bivalent	Bivalent	Bivalent	H3K4me3-only	H3K4me3-only	Bivalent	Bivalent	Bivalent	H3K4me3-only	Bivalent	H3K4me3-only	H3K4me3-only	H3K4me3-only	H3K4me3-only	H3K4me3-only	H3K4me3-only	H3K4me3-only	H3K4me3-only	H3K4me3-only	H3K4me3-only
NM_000429	MAT1A	chr10	82031575	82049434	-	Unmarked	Unmarked	Unmarked	Unmarked	Unmarked	Unmarked	Unmarked	Unmarked	Unmarked	Unmarked	Unmarked	Unmarked	H3K4me3-only	Unmarked	Unmarked	Unmarked	Unmarked	Unmarked	Unmarked	Unmarked
NM_000430	PAFAH1B1	chr17	2496922	2588909	+	H3K4me3-only	H3K4me3-only	Bivalent	H3K4me3-only	H3K4me3-only	H3K4me3-only	H3K4me3-only	H3K4me3-only	H3K4me3-only	H3K4me3-only	H3K4me3-only	H3K4me3-only	H3K4me3-only	H3K4me3-only	H3K4me3-only	H3K4me3-only	H3K4me3-only	H3K4me3-only	H3K4me3-only	H3K4me3-only
NM_000431	MVK	chr12	110011499	110035071	+	H3K4me3-only	H3K4me3-only	H3K4me3-only	H3K4me3-only	H3K4me3-only	H3K4me3-only	H3K4me3-only	H3K4me3-only	H3K4me3-only	H3K4me3-only	H3K4me3-only	H3K4me3-only	H3K4me3-only	H3K4me3-only	H3K4me3-only	H3K4me3-only	H3K4me3-only	H3K4me3-only	H3K4me3-only	H3K4me3-only
NM_000432	MYL2	chr12	111348623	111358404	-	Unmarked	Unmarked	Unmarked	Unmarked	Unmarked	Unmarked	Unmarked	Unmarked	Unmarked	H3K27me3-only	Unmarked	Unmarked	Unmarked	Unmarked	Unmarked	Unmarked	Unmarked	H3K4me3-only	Unmarked	Unmarked
NM_000433	NCF2	chr1	183524696	183559739	-	Unmarked	Unmarked	Unmarked	H3K4me3-only	Unmarked	Unmarked	Unmarked	Unmarked	H3K4me3-only	Unmarked	Unmarked	Unmarked	Unmarked	Unmarked	Unmarked	Unmarked	Unmarked	Unmarked	Unmarked	Unmarked
NM_000434	NEU1	chr6	31826828	31830709	-	H3K4me3-only	H3K4me3-only	H3K4me3-only	H3K4me3-only	H3K4me3-only	H3K4me3-only	H3K4me3-only	H3K4me3-only	H3K4me3-only	H3K4me3-only	H3K4me3-only	H3K4me3-only	H3K4me3-only	H3K4me3-only	H3K4me3-only	H3K4me3-only	H3K4me3-only	H3K4me3-only	H3K4me3-only	H3K4me3-only
NM_000435	NOTCH3	chr19	15270443	15311792	-	H3K4me3-only	H3K4me3-only	H3K4me3-only	Bivalent	Bivalent	Bivalent	H3K4me3-only	H3K4me3-only	Bivalent	Bivalent	Bivalent	H3K4me3-only	Bivalent	Bivalent	Unmarked	H3K4me3-only	H3K4me3-only	H3K4me3-only	H3K4me3-only	H3K4me3-only
NM_000436	OXCT1	chr5	41730166	41870791	-	Bivalent	Bivalent	H3K4me3-only	H3K4me3-only	H3K4me3-only	H3K4me3-only	H3K4me3-only	H3K4me3-only	H3K4me3-only	H3K4me3-only	H3K4me3-only	H3K4me3-only	H3K4me3-only	H3K4me3-only	H3K4me3-only	H3K4me3-only	H3K4me3-only	H3K4me3-only	H3K4me3-only	H3K4me3-only
NM_000437	PAFAH2	chr1	26286257	26324648	-	H3K4me3-only	H3K4me3-only	H3K4me3-only	H3K4me3-only	H3K4me3-only	H3K4me3-only	H3K4me3-only	H3K4me3-only	H3K4me3-only	H3K4me3-only	H3K4me3-only	H3K4me3-only	H3K4me3-only	H3K4me3-only	H3K4me3-only	H3K4me3-only	H3K4me3-only	H3K4me3-only	H3K4me3-only	H3K4me3-only
NM_000439	PCSK1	chr5	95726039	95768985	-	Bivalent	Bivalent	Bivalent	Bivalent	Bivalent	H3K27me3-only	Bivalent	Bivalent	H3K27me3-only	Bivalent	H3K27me3-only	H3K27me3-only	Bivalent	H3K27me3-only	Bivalent	H3K4me3-only	Unmarked	Unmarked	Unmarked	Unmarked
NM_000440	PDE6A	chr5	149237518	149324356	-	Unmarked	Unmarked	Unmarked	H3K27me3-only	Unmarked	Unmarked	Unmarked	Unmarked	Unmarked	Unmarked	Unmarked	Unmarked	Unmarked	H3K27me3-only	Unmarked	Unmarked	Unmarked	Unmarked	Unmarked	Unmarked
NM_000441	SLC26A4	chr7	107301079	107358252	+	Bivalent	Bivalent	H3K27me3-only	Bivalent	Bivalent	Bivalent	H3K27me3-only	Bivalent	Bivalent	Bivalent	Bivalent	H3K27me3-only	Bivalent	Bivalent	H3K27me3-only	H3K4me3-only	Unmarked	Unmarked	Unmarked	Unmarked
NM_000442	PECAM1	chr17	62396776	62407083	-	Unmarked	Unmarked	Unmarked	H3K27me3-only	H3K27me3-only	Unmarked	Unmarked	Unmarked	H3K27me3-only	Unmarked	Unmarked	Unmarked	Unmarked	Unmarked	Unmarked	Unmarked	Unmarked	Unmarked	Unmarked	Unmarked
NM_000443	ABCB4	chr7	87031360	87105019	-	Bivalent	Bivalent	H3K4me3-only	H3K4me3-only	H3K4me3-only	Bivalent	Bivalent	Bivalent	Bivalent	H3K4me3-only	Bivalent	H3K27me3-only	H3K4me3-only	Bivalent	H3K27me3-only	H3K4me3-only	H3K4me3-only	H3K4me3-only	H3K4me3-only	H3K4me3-only
NM_000444	PHEX	chrX	22050920	22266478	+	Unmarked	Unmarked	Unmarked	Unmarked	Unmarked	Unmarked	Unmarked	Unmarked	Unmarked	Unmarked	Unmarked	Unmarked	H3K27me3-only	Unmarked	Unmarked	Unmarked	Unmarked	Unmarked	Unmarked	Unmarked
NM_000445	PLEC	chr8	144989320	145050913	-	Bivalent	Bivalent	Bivalent	Bivalent	Bivalent	H3K4me3-only	Bivalent	Bivalent	H3K4me3-only	H3K4me3-only	H3K4me3-only	H3K4me3-only	H3K4me3-only	H3K4me3-only	H3K4me3-only	H3K4me3-only	H3K4me3-only	H3K4me3-only	H3K4me3-only	H3K4me3-only
NM_000446	PON1	chr7	94927668	94953884	-	Unmarked	H3K4me3-only	Unmarked	H3K27me3-only	Unmarked	Unmarked	H3K27me3-only	Unmarked	H3K27me3-only	Unmarked	Unmarked	H3K27me3-only	Unmarked	H3K27me3-only	Unmarked	Unmarked	Unmarked	Unmarked	Unmarked	Unmarked
NM_000448	RAG1	chr11	36589562	36601310	+	Unmarked	Unmarked	H3K27me3-only	Unmarked	Unmarked	Unmarked	Unmarked	Unmarked	Unmarked	Unmarked	Unmarked	Unmarked	Unmarked	H3K27me3-only	Unmarked	Unmarked	Unmarked	Unmarked	Unmarked	Unmarked
NM_000449	RFX5	chr1	151313115	151319769	-	H3K4me3-only	H3K4me3-only	H3K4me3-only	H3K4me3-only	H3K4me3-only	H3K4me3-only	H3K4me3-only	H3K4me3-only	H3K4me3-only	H3K4me3-only	H3K4me3-only	H3K4me3-only	H3K4me3-only	H3K4me3-only	H3K4me3-only	H3K4me3-only	H3K4me3-only	H3K4me3-only	H3K4me3-only	H3K4me3-only
NM_000450	SELE	chr1	169691780	169703220	-	Unmarked	Unmarked	Unmarked	Unmarked	Unmarked	Unmarked	Unmarked	Unmarked	Unmarked	Unmarked	Unmarked	Unmarked	Unmarked	Unmarked	Unmarked	Unmarked	Unmarked	Unmarked	Unmarked	Unmarked
NM_000452	SLC10A2	chr13	103696347	103719196	-	Unmarked	Unmarked	Unmarked	Unmarked	Unmarked	Unmarked	Unmarked	Unmarked	Unmarked	Unmarked	Unmarked	Unmarked	Unmarked	Unmarked	Unmarked	Unmarked	Unmarked	Unmarked	Unmarked	Unmarked
NM_000453	SLC5A5	chr19	17982781	18005983	+	Unmarked	H3K27me3-only	H3K27me3-only	Bivalent	Bivalent	H3K4me3-only	H3K27me3-only	H3K27me3-only	H3K27me3-only	Bivalent	H3K4me3-only	H3K27me3-only	H3K27me3-only	H3K27me3-only	H3K27me3-only	Unmarked	Unmarked	Unmarked	H3K4me3-only	Unmarked
NM_000454	SOD1	chr21	33031934	33041243	+	H3K4me3-only	H3K4me3-only	H3K4me3-only	H3K4me3-only	H3K4me3-only	H3K4me3-only	H3K4me3-only	H3K4me3-only	H3K4me3-only	H3K4me3-only	H3K4me3-only	H3K4me3-only	H3K4me3-only	H3K4me3-only	H3K4me3-only	H3K4me3-only	H3K4me3-only	H3K4me3-only	H3K4me3-only	H3K4me3-only
NM_000455	STK11	chr19	1205797	1228434	+	H3K4me3-only	H3K4me3-only	H3K4me3-only	H3K4me3-only	H3K4me3-only	H3K4me3-only	H3K4me3-only	H3K4me3-only	H3K4me3-only	H3K4me3-only	H3K4me3-only	H3K4me3-only	H3K4me3-only	H3K4me3-only	H3K4me3-only	H3K4me3-only	H3K4me3-only	H3K4me3-only	H3K4me3-only	H3K4me3-only
NM_000459	TEK	chr9	27109146	27230172	+	H3K4me3-only	H3K4me3-only	Unmarked	Unmarked	Unmarked	H3K4me3-only	H3K4me3-only	H3K4me3-only	Unmarked	Unmarked	Unmarked	H3K27me3-only	Unmarked	Unmarked	H3K4me3-only	Unmarked	Unmarked	H3K4me3-only	Unmarked	Unmarked
NM_000460	THPO	chr3	184089772	184095932	-	H3K27me3-only	Bivalent	H3K27me3-only	H3K27me3-only	Bivalent	H3K27me3-only	H3K27me3-only	Bivalent	H3K27me3-only	H3K27me3-only	H3K27me3-only	H3K27me3-only	Unmarked	H3K27me3-only	H3K27me3-only	Unmarked	Unmarked	Unmarked	Unmarked	Unmarked
NM_000463	UGT1A1	chr2	234668918	234681945	+	Unmarked	Unmarked	Unmarked	Unmarked	Unmarked	Unmarked	Unmarked	Unmarked	Unmarked	Unmarked	Unmarked	Unmarked	Unmarked	Unmarked	Unmarked	Unmarked	Unmarked	Unmarked	Unmarked	Unmarked
NM_000465	BARD1	chr2	215593274	215674428	-	H3K4me3-only	H3K4me3-only	H3K4me3-only	H3K4me3-only	H3K4me3-only	H3K4me3-only	H3K4me3-only	H3K4me3-only	H3K4me3-only	H3K4me3-only	H3K4me3-only	H3K4me3-only	H3K4me3-only	H3K4me3-only	H3K4me3-only	H3K4me3-only	H3K4me3-only	H3K4me3-only	H3K4me3-only	H3K4me3-only
NM_000466	PEX1	chr7	92116336	92157845	-	H3K4me3-only	H3K4me3-only	H3K4me3-only	H3K4me3-only	H3K4me3-only	H3K4me3-only	H3K4me3-only	H3K4me3-only	H3K4me3-only	H3K4me3-only	H3K4me3-only	H3K4me3-only	H3K4me3-only	H3K4me3-only	H3K4me3-only	H3K4me3-only	H3K4me3-only	H3K4me3-only	H3K4me3-only	H3K4me3-only
NM_000474	TWIST1	chr7	19155090	19157295	-	Bivalent	Bivalent	Bivalent	H3K4me3-only	H3K4me3-only	Bivalent	Bivalent	Bivalent	Bivalent	Bivalent	H3K27me3-only	Bivalent	Bivalent	Bivalent	H3K27me3-only	H3K4me3-only	H3K4me3-only	H3K4me3-only	H3K4me3-only	H3K4me3-only
NM_000475	NR0B1	chrX	30322538	30327495	-	Bivalent	Bivalent	Bivalent	Bivalent	Bivalent	Bivalent	H3K27me3-only	H3K27me3-only	H3K27me3-only	H3K4me3-only	H3K27me3-only	Bivalent	Bivalent	Bivalent	Unmarked	H3K4me3-only	Unmarked	Unmarked	Unmarked	Unmarked
NM_000476	AK1	chr9	130628758	130640022	-	H3K4me3-only	H3K4me3-only	H3K4me3-only	H3K4me3-only	H3K4me3-only	H3K4me3-only	Bivalent	Bivalent	H3K4me3-only	H3K4me3-only	Unmarked	H3K4me3-only	H3K4me3-only	H3K4me3-only	H3K4me3-only	H3K4me3-only	H3K4me3-only	H3K4me3-only	H3K4me3-only	H3K4me3-only
NM_000477	ALB	chr4	74269971	74287129	+	Unmarked	Unmarked	Unmarked	Unmarked	Unmarked	Unmarked	Unmarked	Unmarked	Unmarked	Unmarked	Unmarked	Unmarked	Unmarked	Unmarked	Unmarked	Unmarked	Unmarked	Unmarked	Unmarked	Unmarked
NM_000479	AMH	chr19	2249112	2252072	+	Unmarked	Unmarked	H3K27me3-only	Bivalent	Bivalent	H3K27me3-only	H3K27me3-only	H3K27me3-only	H3K27me3-only	Bivalent	H3K27me3-only	Unmarked	H3K27me3-only	H3K27me3-only	Unmarked	Unmarked	Unmarked	Unmarked	Unmarked	Unmarked
NM_000480	AMPD3	chr11	10472223	10529126	+	Bivalent	Bivalent	Bivalent	Bivalent	H3K4me3-only	H3K4me3-only	Bivalent	Bivalent	H3K4me3-only	Bivalent	H3K4me3-only	H3K4me3-only	H3K4me3-only	H3K4me3-only	H3K4me3-only	H3K4me3-only	H3K4me3-only	H3K4me3-only	H3K4me3-only	H3K4me3-only
NM_000481	AMT	chr3	49454210	49460111	-	H3K4me3-only	H3K4me3-only	H3K4me3-only	Unmarked	H3K4me3-only	H3K4me3-only	H3K4me3-only	H3K4me3-only	Unmarked	H3K4me3-only	Unmarked	Unmarked	H3K4me3-only	Unmarked	Unmarked	H3K4me3-only	H3K4me3-only	H3K4me3-only	H3K4me3-only	H3K4me3-only
NM_000482	APOA4	chr11	116691417	116694011	-	Unmarked	Unmarked	Unmarked	H3K27me3-only	H3K27me3-only	Unmarked	H3K4me3-only	H3K4me3-only	Unmarked	Unmarked	Unmarked	Unmarked	Unmarked	H3K27me3-only	Unmarked	Unmarked	Unmarked	Unmarked	Unmarked	Unmarked
NM_000483	APOC2	chr19	45449238	45452822	+	Unmarked	Unmarked	Unmarked	Unmarked	H3K4me3-only	Unmarked	H3K4me3-only	H3K4me3-only	Unmarked	Unmarked	Unmarked	Unmarked	Unmarked	Unmarked	Unmarked	Unmarked	Unmarked	Unmarked	Unmarked	Unmarked
NM_000485	APRT	chr16	88875876	88878342	-	H3K4me3-only	H3K4me3-only	H3K4me3-only	H3K4me3-only	H3K4me3-only	H3K4me3-only	H3K4me3-only	H3K4me3-only	H3K4me3-only	H3K4me3-only	H3K4me3-only	H3K4me3-only	H3K4me3-only	H3K4me3-only	H3K4me3-only	H3K4me3-only	H3K4me3-only	H3K4me3-only	H3K4me3-only	H3K4me3-only
NM_000486	AQP2	chr12	50344523	50352664	+	Unmarked	Unmarked	Unmarked	H3K27me3-only	Bivalent	H3K27me3-only	H3K27me3-only	Unmarked	H3K27me3-only	H3K27me3-only	Unmarked	Unmarked	Unmarked	H3K27me3-only	Unmarked	Unmarked	Unmarked	Unmarked	Unmarked	Unmarked
NM_000488	SERPINC1	chr1	173872941	173886516	-	Unmarked	Unmarked	Unmarked	H3K27me3-only	H3K27me3-only	Unmarked	Unmarked	Unmarked	Unmarked	Unmarked	Unmarked	Unmarked	Unmarked	H3K27me3-only	Unmarked	Unmarked	Unmarked	Unmarked	Unmarked	Unmarked
NM_000490	AVP	chr20	3063201	3065370	-	H3K27me3-only	H3K27me3-only	H3K27me3-only	Bivalent	Bivalent	Unmarked	H3K27me3-only	H3K27me3-only	H3K27me3-only	H3K27me3-only	H3K27me3-only	H3K27me3-only	H3K27me3-only	H3K27me3-only	H3K27me3-only	Unmarked	Unmarked	Unmarked	Unmarked	Unmarked
NM_000491	C1QB	chr1	22979681	22988029	+	Unmarked	Unmarked	Unmarked	H3K27me3-only	H3K27me3-only	Unmarked	H3K27me3-only	H3K27me3-only	Unmarked	H3K27me3-only	Unmarked	H3K27me3-only	H3K27me3-only	H3K27me3-only	Unmarked	Unmarked	Unmarked	Unmarked	Unmarked	Unmarked
NM_000492	CFTR	chr7	117120016	117308718	+	Bivalent	Bivalent	Bivalent	Bivalent	Bivalent	Bivalent	H3K4me3-only	H3K4me3-only	Bivalent	H3K27me3-only	Unmarked	Bivalent	H3K4me3-only	Bivalent	H3K27me3-only	H3K4me3-only	H3K4me3-only	Unmarked	H3K4me3-only	H3K4me3-only
NM_000493	COL10A1	chr6	116440084	116447296	-	Unmarked	Unmarked	Unmarked	Unmarked	Unmarked	Unmarked	Unmarked	Unmarked	Unmarked	Unmarked	Unmarked	Unmarked	Unmarked	Unmarked	Unmarked	Unmarked	Unmarked	Unmarked	Unmarked	Unmarked
NM_000494	COL17A1	chr10	105791045	105845638	-	Unmarked	Unmarked	Unmarked	Unmarked	Unmarked	Unmarked	Unmarked	Unmarked	H3K4me3-only	Unmarked	Unmarked	H3K4me3-only	H3K4me3-only	Unmarked	Unmarked	Unmarked	Unmarked	Unmarked	Unmarked	Unmarked
NM_000496	CRYBB2	chr22	25615611	25627836	+	Unmarked	Unmarked	Unmarked	Unmarked	Unmarked	Unmarked	Unmarked	Unmarked	H3K27me3-only	H3K27me3-only	Unmarked	Unmarked	Unmarked	Unmarked	Unmarked	Unmarked	Unmarked	Unmarked	Unmarked	Unmarked
NM_000498	CYP11B2	chr8	143991974	143999259	-	Unmarked	Unmarked	H3K27me3-only	Unmarked	H3K27me3-only	H3K27me3-only	Unmarked	Unmarked	Unmarked	H3K27me3-only	Unmarked	Unmarked	Unmarked	Unmarked	Unmarked	Unmarked	Unmarked	Unmarked	Unmarked	Unmarked
NM_000499	CYP1A1	chr15	75011882	75017877	-	Bivalent	Bivalent	Bivalent	Bivalent	Bivalent	Bivalent	Bivalent	Bivalent	Bivalent	H3K4me3-only	Bivalent	H3K4me3-only	H3K4me3-only	H3K27me3-only	H3K4me3-only	H3K4me3-only	H3K4me3-only	Unmarked	H3K4me3-only	H3K4me3-only
NM_000502	EPX	chr17	56270088	56282535	+	Unmarked	Unmarked	H3K27me3-only	H3K27me3-only	H3K27me3-only	Unmarked	H3K27me3-only	Unmarked	H3K27me3-only	H3K27me3-only	Unmarked	Unmarked	H3K27me3-only	H3K27me3-only	Unmarked	Unmarked	Unmarked	Unmarked	Unmarked	Unmarked
NM_000503	EYA1	chr8	72109667	72274467	-	H3K4me3-only	H3K4me3-only	H3K4me3-only	H3K4me3-only	H3K4me3-only	Bivalent	Bivalent	Bivalent	H3K4me3-only	H3K4me3-only	Unmarked	H3K4me3-only	H3K4me3-only	H3K4me3-only	Unmarked	H3K4me3-only	H3K4me3-only	H3K4me3-only	H3K4me3-only	Unmarked
NM_000504	F10	chr13	113777112	113803843	+	Unmarked	Unmarked	H3K27me3-only	H3K4me3-only	Bivalent	Unmarked	H3K4me3-only	H3K4me3-only	H3K27me3-only	H3K27me3-only	Unmarked	Unmarked	H3K27me3-only	H3K4me3-only	Unmarked	Unmarked	Unmarked	Unmarked	Unmarked	Unmarked
NM_000505	F12	chr5	176829138	176836577	-	H3K27me3-only	H3K27me3-only	H3K27me3-only	H3K27me3-only	H3K27me3-only	Unmarked	Unmarked	Unmarked	Unmarked	Unmarked	Unmarked	Unmarked	Unmarked	H3K27me3-only	Unmarked	Unmarked	Unmarked	Unmarked	Unmarked	Unmarked
NM_000506	F2	chr11	46740742	46761056	+	Unmarked	Unmarked	Unmarked	Unmarked	Unmarked	Unmarked	Unmarked	Unmarked	Unmarked	Unmarked	Unmarked	Unmarked	Unmarked	Unmarked	Unmarked	Unmarked	Unmarked	Unmarked	Unmarked	Unmarked
NM_000507	FBP1	chr9	97365420	97401923	-	Bivalent	Bivalent	Bivalent	Bivalent	Bivalent	Bivalent	H3K4me3-only	H3K4me3-only	Bivalent	Bivalent	H3K4me3-only	Bivalent	Bivalent	Bivalent	H3K4me3-only	H3K4me3-only	H3K4me3-only	H3K4me3-only	H3K4me3-only	H3K4me3-only
NM_000508	FGA	chr4	155504279	155511897	-	Unmarked	Unmarked	Unmarked	Unmarked	Unmarked	Unmarked	H3K4me3-only	H3K4me3-only	Unmarked	Unmarked	Unmarked	Unmarked	Unmarked	Unmarked	Unmarked	Unmarked	Unmarked	Unmarked	Unmarked	Unmarked
NM_000509	FGG	chr4	155525285	155533902	-	Unmarked	Unmarked	H3K27me3-only	Unmarked	Unmarked	Unmarked	Unmarked	H3K4me3-only	Unmarked	Unmarked	Unmarked	Unmarked	Unmarked	Unmarked	Unmarked	Unmarked	Unmarked	Unmarked	Unmarked	Unmarked
NM_000510	FSHB	chr11	30252562	30256824	+	Unmarked	Unmarked	Unmarked	Unmarked	Unmarked	Unmarked	Unmarked	Unmarked	Unmarked	Unmarked	Unmarked	Unmarked	Unmarked	Unmarked	Unmarked	Unmarked	Unmarked	Unmarked	Unmarked	Unmarked
NM_000512	GALNS	chr16	88880141	88923374	-	H3K4me3-only	H3K4me3-only	H3K4me3-only	H3K4me3-only	H3K4me3-only	H3K4me3-only	H3K4me3-only	H3K4me3-only	H3K4me3-only	H3K4me3-only	H3K4me3-only	H3K4me3-only	H3K4me3-only	H3K4me3-only	H3K4me3-only	H3K4me3-only	H3K4me3-only	H3K4me3-only	H3K4me3-only	H3K4me3-only
NM_000514	GDNF	chr5	37812778	37839782	-	Bivalent	Bivalent	Bivalent	Bivalent	H3K4me3-only	Bivalent	Bivalent	Bivalent	H3K4me3-only	Bivalent	H3K27me3-only	H3K4me3-only	Bivalent	Bivalent	H3K27me3-only	H3K4me3-only	H3K4me3-only	Unmarked	H3K4me3-only	H3K4me3-only
NM_000515	GH1	chr17	61994562	61996198	-	Unmarked	H3K4me3-only	H3K27me3-only	H3K27me3-only	H3K27me3-only	Unmarked	H3K27me3-only	Unmarked	H3K27me3-only	Unmarked	Unmarked	Unmarked	Unmarked	H3K27me3-only	Unmarked	Unmarked	Unmarked	Unmarked	Unmarked	Unmarked
NM_000517	HBA2	chr16	222845	223709	+	H3K27me3-only	H3K27me3-only	H3K27me3-only	H3K27me3-only	H3K27me3-only	H3K27me3-only	H3K27me3-only	H3K27me3-only	H3K27me3-only	H3K27me3-only	H3K27me3-only	H3K27me3-only	H3K27me3-only	H3K27me3-only	Unmarked	Unmarked	Unmarked	Unmarked	Unmarked	Unmarked
NM_000518	HBB	chr11	5246695	5248301	-	Unmarked	Unmarked	Unmarked	Unmarked	Unmarked	H3K27me3-only	Unmarked	Unmarked	Unmarked	Unmarked	Unmarked	Unmarked	Unmarked	Unmarked	Unmarked	Unmarked	Unmarked	Unmarked	Unmarked	Unmarked
NM_000519	HBD	chr11	5254058	5255858	-	Unmarked	Unmarked	Unmarked	Unmarked	Unmarked	H3K4me3-only	Unmarked	Unmarked	Unmarked	Unmarked	Unmarked	Unmarked	Unmarked	Unmarked	Unmarked	Unmarked	Unmarked	Unmarked	Unmarked	Unmarked
NM_000520	HEXA	chr15	72635777	72668520	-	H3K4me3-only	H3K4me3-only	H3K4me3-only	H3K4me3-only	H3K4me3-only	H3K4me3-only	H3K4me3-only	H3K4me3-only	H3K4me3-only	H3K4me3-only	H3K4me3-only	H3K4me3-only	H3K4me3-only	H3K4me3-only	H3K4me3-only	H3K4me3-only	H3K4me3-only	H3K4me3-only	H3K4me3-only	H3K4me3-only
NM_000521	HEXB	chr5	73980968	74017113	+	H3K4me3-only	H3K4me3-only	H3K4me3-only	H3K4me3-only	H3K4me3-only	H3K4me3-only	H3K4me3-only	H3K4me3-only	H3K4me3-only	H3K4me3-only	H3K4me3-only	H3K4me3-only	H3K4me3-only	H3K4me3-only	H3K4me3-only	H3K4me3-only	H3K4me3-only	H3K4me3-only	H3K4me3-only	H3K4me3-only
NM_000522	HOXA13	chr7	27236498	27239725	-	Bivalent	Bivalent	Bivalent	Bivalent	Bivalent	Bivalent	Bivalent	H3K27me3-only	Bivalent	Bivalent	Bivalent	Bivalent	Bivalent	Bivalent	Bivalent	H3K4me3-only	H3K4me3-only	Unmarked	Unmarked	H3K4me3-only
NM_000523	HOXD13	chr2	176957531	176960666	+	Bivalent	Bivalent	Bivalent	Bivalent	Bivalent	Bivalent	H3K27me3-only	H3K27me3-only	Bivalent	Bivalent	H3K27me3-only	H3K27me3-only	Bivalent	H3K27me3-only	H3K27me3-only	Unmarked	H3K4me3-only	Unmarked	Unmarked	H3K4me3-only
NM_000524	HTR1A	chr5	63255874	63258119	-	Bivalent	Bivalent	Bivalent	H3K27me3-only	H3K27me3-only	H3K27me3-only	H3K27me3-only	H3K27me3-only	H3K27me3-only	H3K27me3-only	H3K27me3-only	H3K27me3-only	H3K27me3-only	Unmarked	H3K27me3-only	Unmarked	Unmarked	Unmarked	Unmarked	Unmarked
NM_000525	KCNJ11	chr11	17406795	17410206	-	H3K4me3-only	H3K4me3-only	Bivalent	Bivalent	Bivalent	H3K4me3-only	H3K4me3-only	H3K4me3-only	Bivalent	H3K27me3-only	H3K4me3-only	H3K4me3-only	H3K4me3-only	Unmarked	Unmarked	H3K4me3-only	H3K4me3-only	H3K4me3-only	H3K4me3-only	H3K4me3-only
NM_000526	KRT14	chr17	39738530	39743147	-	Unmarked	Unmarked	Unmarked	H3K27me3-only	H3K27me3-only	Unmarked	Unmarked	Unmarked	H3K4me3-only	H3K27me3-only	Unmarked	H3K4me3-only	H3K4me3-only	Unmarked	Unmarked	Unmarked	H3K4me3-only	Unmarked	Unmarked	Unmarked
NM_000529	MC2R	chr18	13882042	13915535	-	Unmarked	Unmarked	Unmarked	Unmarked	Unmarked	Unmarked	Unmarked	Unmarked	Unmarked	Unmarked	Unmarked	Unmarked	Unmarked	Unmarked	Unmarked	Unmarked	Unmarked	Unmarked	Unmarked	Unmarked
NM_000530	MPZ	chr1	161274524	161279762	-	Unmarked	Unmarked	H3K27me3-only	Unmarked	H3K4me3-only	Unmarked	Unmarked	H3K27me3-only	Unmarked	H3K4me3-only	Unmarked	Unmarked	Unmarked	Unmarked	Unmarked	Unmarked	Unmarked	Unmarked	Unmarked	Unmarked
NM_000531	OTC	chrX	38211735	38280703	+	Unmarked	Unmarked	Unmarked	Unmarked	Unmarked	Unmarked	H3K4me3-only	H3K4me3-only	Unmarked	Unmarked	Unmarked	Unmarked	H3K27me3-only	Unmarked	Unmarked	Unmarked	Unmarked	Unmarked	Unmarked	Unmarked
NM_000532	PCCB	chr3	135969166	136049013	+	H3K4me3-only	H3K4me3-only	H3K4me3-only	H3K4me3-only	H3K4me3-only	H3K4me3-only	H3K4me3-only	H3K4me3-only	H3K4me3-only	H3K4me3-only	H3K4me3-only	H3K4me3-only	H3K4me3-only	H3K4me3-only	H3K4me3-only	H3K4me3-only	H3K4me3-only	H3K4me3-only	H3K4me3-only	H3K4me3-only
NM_000533	PLP1	chrX	103031753	103047547	+	Unmarked	H3K4me3-only	H3K4me3-only	Unmarked	H3K27me3-only	Unmarked	Unmarked	Unmarked	H3K27me3-only	H3K4me3-only	Unmarked	Unmarked	H3K27me3-only	H3K27me3-only	Unmarked	Unmarked	Unmarked	Unmarked	Unmarked	Unmarked
NM_000535	PMS2	chr7	6012869	6048737	-	H3K4me3-only	H3K4me3-only	H3K4me3-only	H3K4me3-only	H3K4me3-only	H3K4me3-only	H3K4me3-only	H3K4me3-only	H3K4me3-only	H3K4me3-only	H3K4me3-only	H3K4me3-only	H3K4me3-only	H3K4me3-only	H3K4me3-only	H3K4me3-only	H3K4me3-only	H3K4me3-only	H3K4me3-only	H3K4me3-only
NM_000537	REN	chr1	204123943	204135465	-	Unmarked	Unmarked	Unmarked	H3K27me3-only	H3K27me3-only	Unmarked	Unmarked	Unmarked	Unmarked	Unmarked	H3K27me3-only	Unmarked	Unmarked	Unmarked	Unmarked	Unmarked	Unmarked	Unmarked	Unmarked	Unmarked
NM_000538	RFXAP	chr13	37393338	37403740	+	H3K4me3-only	H3K4me3-only	H3K4me3-only	H3K4me3-only	H3K4me3-only	H3K4me3-only	H3K4me3-only	H3K4me3-only	H3K4me3-only	H3K4me3-only	H3K4me3-only	H3K4me3-only	H3K4me3-only	H3K4me3-only	H3K4me3-only	H3K4me3-only	H3K4me3-only	H3K4me3-only	H3K4me3-only	H3K4me3-only
NM_000539	RHO	chr3	129247481	129254187	+	Unmarked	Unmarked	Unmarked	H3K27me3-only	Unmarked	Unmarked	Unmarked	Unmarked	H3K27me3-only	H3K27me3-only	Unmarked	Unmarked	Unmarked	Unmarked	Unmarked	Unmarked	Unmarked	Unmarked	Unmarked	Unmarked
NM_000540	RYR1	chr19	38924339	39078204	+	H3K4me3-only	H3K4me3-only	H3K27me3-only	H3K27me3-only	H3K27me3-only	H3K27me3-only	H3K27me3-only	H3K27me3-only	H3K27me3-only	H3K27me3-only	Unmarked	Unmarked	H3K4me3-only	H3K27me3-only	Unmarked	Unmarked	Unmarked	Unmarked	Unmarked	Unmarked
NM_000541	SAG	chr2	234216308	234255701	+	Unmarked	Unmarked	Unmarked	Unmarked	Unmarked	Unmarked	Unmarked	Unmarked	Unmarked	Unmarked	Unmarked	Unmarked	Unmarked	Unmarked	Unmarked	Unmarked	Unmarked	Unmarked	Unmarked	Unmarked
NM_000542	SFTPB	chr2	85884439	85895864	-	Unmarked	Unmarked	Unmarked	H3K27me3-only	Bivalent	Unmarked	Unmarked	Unmarked	H3K27me3-only	H3K4me3-only	Unmarked	H3K27me3-only	Unmarked	Unmarked	Unmarked	Unmarked	Unmarked	Unmarked	Unmarked	Unmarked
NM_000543	SMPD1	chr11	6411643	6416228	+	H3K4me3-only	H3K4me3-only	H3K4me3-only	H3K4me3-only	H3K4me3-only	H3K4me3-only	H3K4me3-only	H3K4me3-only	H3K4me3-only	H3K4me3-only	H3K4me3-only	H3K4me3-only	H3K4me3-only	H3K4me3-only	H3K4me3-only	H3K4me3-only	H3K4me3-only	H3K4me3-only	H3K4me3-only	H3K4me3-only
NM_000545	HNF1A	chr12	121416548	121440314	+	Unmarked	Unmarked	Unmarked	H3K27me3-only	H3K27me3-only	Unmarked	H3K4me3-only	H3K4me3-only	Unmarked	Unmarked	Unmarked	Unmarked	Unmarked	Unmarked	Unmarked	H3K4me3-only	Unmarked	Unmarked	H3K4me3-only	H3K4me3-only
NM_000547	TPO	chr2	1417232	1546499	+	Unmarked	Unmarked	Unmarked	Unmarked	Unmarked	Unmarked	Unmarked	Unmarked	Unmarked	Unmarked	Unmarked	Unmarked	Unmarked	Unmarked	Unmarked	Unmarked	Unmarked	Unmarked	Unmarked	Unmarked
NM_000548	TSC2	chr16	2097989	2138713	+	H3K4me3-only	H3K4me3-only	H3K4me3-only	H3K4me3-only	H3K4me3-only	H3K4me3-only	H3K4me3-only	H3K4me3-only	H3K4me3-only	H3K4me3-only	H3K4me3-only	H3K4me3-only	H3K4me3-only	H3K4me3-only	H3K4me3-only	H3K4me3-only	H3K4me3-only	H3K4me3-only	H3K4me3-only	H3K4me3-only
NM_000549	TSHB	chr1	115572444	115576930	+	Unmarked	Unmarked	Unmarked	Unmarked	Unmarked	Unmarked	Unmarked	Unmarked	Unmarked	Unmarked	Unmarked	Unmarked	Unmarked	Unmarked	Unmarked	Unmarked	Unmarked	Unmarked	Unmarked	Unmarked
NM_000550	TYRP1	chr9	12693385	12710266	+	Unmarked	Unmarked	Unmarked	Unmarked	Unmarked	Unmarked	Unmarked	Unmarked	Unmarked	H3K4me3-only	Unmarked	Unmarked	Unmarked	Unmarked	Unmarked	Unmarked	Unmarked	Unmarked	Unmarked	Unmarked
NM_000551	VHL	chr3	10183318	10195354	+	H3K4me3-only	H3K4me3-only	H3K4me3-only	H3K4me3-only	H3K4me3-only	H3K4me3-only	H3K4me3-only	H3K4me3-only	H3K4me3-only	H3K4me3-only	H3K4me3-only	H3K4me3-only	H3K4me3-only	H3K4me3-only	H3K4me3-only	H3K4me3-only	H3K4me3-only	H3K4me3-only	H3K4me3-only	H3K4me3-only
NM_000552	VWF	chr12	6058039	6233836	-	Unmarked	Unmarked	Unmarked	H3K27me3-only	H3K27me3-only	H3K4me3-only	Unmarked	Unmarked	Unmarked	Unmarked	Unmarked	Unmarked	Unmarked	H3K27me3-only	H3K4me3-only	Unmarked	Unmarked	H3K4me3-only	Unmarked	Unmarked
NM_000553	WRN	chr8	30890777	31031277	+	H3K4me3-only	H3K4me3-only	Bivalent	H3K4me3-only	H3K4me3-only	Bivalent	Bivalent	Bivalent	Bivalent	H3K4me3-only	H3K4me3-only	Bivalent	H3K4me3-only	H3K4me3-only	H3K4me3-only	H3K4me3-only	H3K4me3-only	H3K4me3-only	H3K4me3-only	H3K4me3-only
NM_000554	CRX	chr19	48325098	48346586	+	Unmarked	Unmarked	H3K27me3-only	H3K27me3-only	H3K27me3-only	H3K27me3-only	H3K27me3-only	H3K27me3-only	H3K27me3-only	Unmarked	Unmarked	Unmarked	Unmarked	H3K27me3-only	Unmarked	Unmarked	Unmarked	Unmarked	Unmarked	Unmarked
NM_000555	DCX	chrX	110537006	110654374	-	Unmarked	H3K4me3-only	Bivalent	Unmarked	Unmarked	H3K27me3-only	Unmarked	Unmarked	Unmarked	Unmarked	Unmarked	Unmarked	H3K27me3-only	Unmarked	Unmarked	H3K4me3-only	Unmarked	Unmarked	Unmarked	Unmarked
NM_000557	GDF5	chr20	34021148	34026027	-	Unmarked	Unmarked	H3K4me3-only	H3K4me3-only	H3K4me3-only	Unmarked	Unmarked	Unmarked	H3K4me3-only	Unmarked	Unmarked	Unmarked	H3K4me3-only	H3K4me3-only	Unmarked	Unmarked	Unmarked	Unmarked	Unmarked	Unmarked
NM_000558	HBA1	chr16	226678	227520	+	H3K27me3-only	H3K27me3-only	H3K27me3-only	Bivalent	H3K27me3-only	H3K27me3-only	H3K27me3-only	H3K27me3-only	H3K27me3-only	H3K27me3-only	H3K27me3-only	H3K27me3-only	H3K27me3-only	H3K27me3-only	H3K27me3-only	Unmarked	Unmarked	Unmarked	Unmarked	Unmarked
NM_000559	HBG1	chr11	5269501	5271087	-	Unmarked	Unmarked	Unmarked	Unmarked	Unmarked	Unmarked	Unmarked	Unmarked	Unmarked	Unmarked	Unmarked	Unmarked	Unmarked	Unmarked	Unmarked	Unmarked	Unmarked	Unmarked	Unmarked	Unmarked
NM_000560	CD53	chr1	111415721	111442558	+	Unmarked	Unmarked	Unmarked	Unmarked	Unmarked	H3K4me3-only	H3K4me3-only	H3K4me3-only	Unmarked	Unmarked	H3K4me3-only	Unmarked	Unmarked	Unmarked	Unmarked	Unmarked	Unmarked	Unmarked	Unmarked	Unmarked
NM_000561	GSTM1	chr1	110230417	110236367	+	H3K4me3-only	Unmarked	H3K4me3-only	H3K4me3-only	H3K4me3-only	H3K4me3-only	Unmarked	Unmarked	H3K4me3-only	H3K4me3-only	H3K4me3-only	Unmarked	H3K4me3-only	H3K4me3-only	Unmarked	Unmarked	H3K4me3-only	H3K4me3-only	H3K4me3-only	H3K4me3-only
NM_000562	C8A	chr1	57320442	57383894	+	Unmarked	Unmarked	Unmarked	Unmarked	Unmarked	Unmarked	Unmarked	Unmarked	Unmarked	Unmarked	Unmarked	Unmarked	Unmarked	Unmarked	Unmarked	Unmarked	Unmarked	Unmarked	Unmarked	Unmarked
NM_000566	FCGR1A	chr1	149754249	149764074	+	Unmarked	Unmarked	Unmarked	Unmarked	Unmarked	Unmarked	Unmarked	Unmarked	Unmarked	Unmarked	Unmarked	Unmarked	Unmarked	Unmarked	Unmarked	Unmarked	Unmarked	Unmarked	Unmarked	Unmarked
NM_000567	CRP	chr1	159682078	159684379	-	Unmarked	Unmarked	Unmarked	Unmarked	Unmarked	Unmarked	Unmarked	Unmarked	Unmarked	Unmarked	Unmarked	Unmarked	Unmarked	Unmarked	Unmarked	Unmarked	Unmarked	Unmarked	Unmarked	Unmarked
NM_000569	FCGR3A	chr1	161511550	161519818	-	Unmarked	Unmarked	Unmarked	H3K27me3-only	H3K27me3-only	Unmarked	Unmarked	Unmarked	Unmarked	Unmarked	Unmarked	Unmarked	Unmarked	Unmarked	Unmarked	Unmarked	Unmarked	Unmarked	Unmarked	Unmarked
NM_000570	FCGR3B	chr1	161592987	161601753	-	Unmarked	Unmarked	Unmarked	Unmarked	Unmarked	Unmarked	Unmarked	Unmarked	Unmarked	Unmarked	Unmarked	Unmarked	Unmarked	Unmarked	Unmarked	Unmarked	Unmarked	Unmarked	Unmarked	Unmarked
NM_000572	IL10	chr1	206940947	206945839	-	Unmarked	Unmarked	Unmarked	H3K27me3-only	H3K27me3-only	Unmarked	Unmarked	Unmarked	H3K27me3-only	Unmarked	Unmarked	Unmarked	Unmarked	Unmarked	H3K27me3-only	Unmarked	Unmarked	Unmarked	Unmarked	Unmarked
NM_000574	CD55	chr1	207494816	207534311	+	H3K4me3-only	H3K4me3-only	Bivalent	H3K4me3-only	H3K4me3-only	H3K4me3-only	H3K4me3-only	H3K4me3-only	H3K4me3-only	H3K4me3-only	H3K4me3-only	H3K4me3-only	H3K4me3-only	H3K4me3-only	H3K4me3-only	H3K4me3-only	H3K4me3-only	H3K4me3-only	H3K4me3-only	H3K4me3-only
NM_000575	IL1A	chr2	113531491	113542971	-	Unmarked	Unmarked	Unmarked	Unmarked	Unmarked	Unmarked	Unmarked	Unmarked	H3K4me3-only	Unmarked	Unmarked	Unmarked	Unmarked	Unmarked	Unmarked	Unmarked	Unmarked	Unmarked	Unmarked	Unmarked
NM_000576	IL1B	chr2	113587336	113594356	-	Unmarked	Unmarked	Unmarked	H3K27me3-only	Unmarked	H3K4me3-only	Unmarked	Unmarked	H3K4me3-only	Unmarked	Unmarked	H3K4me3-only	H3K4me3-only	Unmarked	Unmarked	Unmarked	Unmarked	Unmarked	Unmarked	Unmarked
NM_000578	SLC11A1	chr2	219246751	219261617	+	Unmarked	Unmarked	H3K27me3-only	H3K27me3-only	H3K27me3-only	Unmarked	Unmarked	Unmarked	H3K27me3-only	Unmarked	Unmarked	Unmarked	Unmarked	H3K27me3-only	Unmarked	Unmarked	Unmarked	Unmarked	Unmarked	Unmarked
NM_000579	CCR5	chr3	46411632	46417697	+	Unmarked	Unmarked	Unmarked	Unmarked	Unmarked	Unmarked	Unmarked	Unmarked	Unmarked	Unmarked	Unmarked	H3K27me3-only	Unmarked	H3K27me3-only	H3K27me3-only	Unmarked	Unmarked	Unmarked	Unmarked	Unmarked
NM_000581	GPX1	chr3	49394608	49395791	-	H3K4me3-only	H3K4me3-only	H3K4me3-only	H3K4me3-only	H3K4me3-only	H3K4me3-only	H3K4me3-only	H3K4me3-only	H3K4me3-only	H3K4me3-only	H3K4me3-only	H3K4me3-only	H3K4me3-only	H3K4me3-only	H3K4me3-only	H3K4me3-only	H3K4me3-only	H3K4me3-only	H3K4me3-only	H3K4me3-only
NM_000583	GC	chr4	72607410	72650079	-	Unmarked	Unmarked	Unmarked	Unmarked	Unmarked	Unmarked	Unmarked	Unmarked	Unmarked	Unmarked	Unmarked	Unmarked	Unmarked	Unmarked	Unmarked	H3K4me3-only	Unmarked	Unmarked	Unmarked	Unmarked
NM_000584	IL8	chr4	74606222	74609433	+	Unmarked	Unmarked	Unmarked	Unmarked	Unmarked	H3K4me3-only	Unmarked	Unmarked	H3K4me3-only	Unmarked	Unmarked	Unmarked	H3K4me3-only	Unmarked	H3K4me3-only	H3K4me3-only	Unmarked	Unmarked	Unmarked	Unmarked
NM_000585	IL15	chr4	142557748	142655140	+	Bivalent	Bivalent	Bivalent	H3K4me3-only	H3K4me3-only	H3K4me3-only	H3K4me3-only	H3K4me3-only	H3K4me3-only	H3K4me3-only	H3K4me3-only	H3K4me3-only	H3K4me3-only	H3K4me3-only	H3K4me3-only	H3K4me3-only	H3K4me3-only	H3K4me3-only	H3K4me3-only	H3K4me3-only
NM_000586	IL2	chr4	123372625	123377650	-	Unmarked	Unmarked	Unmarked	Unmarked	Unmarked	Unmarked	Unmarked	Unmarked	Unmarked	Unmarked	Unmarked	Unmarked	Unmarked	Unmarked	Unmarked	Unmarked	Unmarked	Unmarked	Unmarked	Unmarked
NM_000587	C7	chr5	40909598	40983042	+	Unmarked	Unmarked	Unmarked	Unmarked	Unmarked	Unmarked	Unmarked	Unmarked	Unmarked	Unmarked	Unmarked	Unmarked	H3K27me3-only	Unmarked	Unmarked	Unmarked	Unmarked	Unmarked	Unmarked	Unmarked
NM_000588	IL3	chr5	131396346	131398896	+	Unmarked	Unmarked	Unmarked	H3K27me3-only	H3K27me3-only	Unmarked	Unmarked	Unmarked	Unmarked	Unmarked	Unmarked	Unmarked	Unmarked	Unmarked	Unmarked	Unmarked	Unmarked	Unmarked	Unmarked	Unmarked
NM_000590	IL9	chr5	135227934	135231516	-	Unmarked	Unmarked	Unmarked	Unmarked	Unmarked	H3K27me3-only	Unmarked	Unmarked	Unmarked	Unmarked	Unmarked	Unmarked	H3K27me3-only	Unmarked	H3K27me3-only	Unmarked	Unmarked	Unmarked	Unmarked	Unmarked
NM_000591	CD14	chr5	140011312	140013035	-	Unmarked	Bivalent	Bivalent	Bivalent	H3K4me3-only	Bivalent	Bivalent	Bivalent	H3K4me3-only	H3K4me3-only	H3K4me3-only	H3K4me3-only	H3K4me3-only	H3K4me3-only	H3K4me3-only	H3K4me3-only	Unmarked	H3K4me3-only	H3K4me3-only	H3K4me3-only
NM_000593	TAP1	chr6	32812985	32821748	-	Bivalent	Bivalent	Bivalent	H3K4me3-only	H3K4me3-only	H3K4me3-only	H3K4me3-only	H3K4me3-only	H3K4me3-only	H3K4me3-only	H3K4me3-only	H3K4me3-only	H3K4me3-only	H3K4me3-only	H3K4me3-only	H3K4me3-only	H3K4me3-only	H3K4me3-only	H3K4me3-only	H3K4me3-only
NM_000594	TNF	chr6	31543343	31546112	+	Unmarked	Unmarked	H3K27me3-only	Bivalent	Bivalent	H3K4me3-only	Bivalent	Bivalent	H3K4me3-only	H3K4me3-only	H3K4me3-only	Unmarked	H3K4me3-only	H3K27me3-only	Unmarked	Unmarked	H3K4me3-only	Unmarked	H3K4me3-only	Unmarked
NM_000595	LTA	chr6	31540070	31542100	+	Unmarked	Unmarked	H3K27me3-only	H3K27me3-only	Bivalent	Unmarked	H3K27me3-only	Unmarked	Unmarked	Unmarked	H3K4me3-only	Unmarked	Unmarked	H3K27me3-only	Unmarked	Unmarked	H3K4me3-only	Unmarked	Unmarked	Unmarked
NM_000596	IGFBP1	chr7	45927958	45933267	+	Bivalent	Bivalent	Bivalent	Bivalent	Bivalent	Bivalent	H3K27me3-only	H3K27me3-only	Bivalent	Bivalent	H3K27me3-only	H3K4me3-only	H3K4me3-only	Bivalent	H3K4me3-only	Unmarked	Unmarked	Unmarked	Unmarked	Unmarked
NM_000597	IGFBP2	chr2	217498126	217529158	+	H3K4me3-only	H3K4me3-only	Bivalent	Bivalent	Bivalent	Bivalent	H3K4me3-only	Bivalent	Bivalent	Bivalent	H3K27me3-only	H3K4me3-only	H3K4me3-only	Bivalent	H3K4me3-only	H3K4me3-only	H3K4me3-only	H3K4me3-only	H3K4me3-only	H3K4me3-only
NM_000598	IGFBP3	chr7	45951843	45960871	-	Bivalent	Bivalent	Bivalent	Bivalent	H3K4me3-only	Bivalent	Bivalent	Bivalent	Bivalent	H3K4me3-only	Bivalent	Bivalent	H3K4me3-only	Bivalent	Bivalent	H3K4me3-only	H3K4me3-only	H3K4me3-only	H3K4me3-only	H3K4me3-only
NM_000599	IGFBP5	chr2	217536827	217560272	-	Bivalent	Bivalent	H3K4me3-only	Bivalent	Bivalent	H3K27me3-only	Bivalent	Bivalent	H3K27me3-only	Unmarked	H3K27me3-only	Unmarked	H3K4me3-only	H3K4me3-only	H3K27me3-only	H3K4me3-only	Unmarked	H3K4me3-only	Unmarked	Unmarked
NM_000600	IL6	chr7	22766765	22771621	+	H3K4me3-only	H3K4me3-only	Unmarked	H3K4me3-only	H3K4me3-only	Bivalent	Unmarked	Unmarked	H3K4me3-only	H3K4me3-only	Bivalent	H3K4me3-only	H3K4me3-only	H3K4me3-only	H3K4me3-only	Unmarked	Unmarked	H3K4me3-only	H3K4me3-only	Unmarked
NM_000601	HGF	chr7	81331443	81399452	-	Unmarked	Unmarked	H3K4me3-only	H3K4me3-only	H3K4me3-only	H3K4me3-only	H3K4me3-only	H3K4me3-only	Bivalent	Unmarked	H3K4me3-only	Unmarked	H3K4me3-only	H3K4me3-only	Unmarked	Unmarked	Unmarked	H3K4me3-only	Unmarked	Unmarked
NM_000602	SERPINE1	chr7	100770369	100782547	+	Unmarked	H3K4me3-only	Bivalent	H3K4me3-only	H3K4me3-only	H3K4me3-only	H3K27me3-only	H3K27me3-only	H3K4me3-only	H3K4me3-only	H3K27me3-only	H3K4me3-only	H3K4me3-only	H3K4me3-only	H3K4me3-only	H3K4me3-only	H3K4me3-only	Unmarked	Unmarked	Unmarked
NM_000603	NOS3	chr7	150688143	150711687	+	Unmarked	Unmarked	Unmarked	H3K27me3-only	Bivalent	Unmarked	Unmarked	Unmarked	Unmarked	H3K27me3-only	Unmarked	Unmarked	H3K27me3-only	H3K27me3-only	Unmarked	Unmarked	Unmarked	Unmarked	Unmarked	Unmarked
NM_000605	IFNA2	chr9	21384253	21385396	-	Unmarked	Unmarked	Unmarked	H3K27me3-only	Unmarked	Unmarked	Unmarked	Unmarked	H3K27me3-only	Unmarked	Unmarked	Unmarked	Unmarked	H3K27me3-only	H3K27me3-only	Unmarked	Unmarked	Unmarked	Unmarked	Unmarked
NM_000606	C8G	chr9	139839697	139841426	+	Unmarked	Unmarked	H3K4me3-only	Bivalent	Bivalent	H3K4me3-only	H3K4me3-only	H3K4me3-only	H3K4me3-only	H3K4me3-only	Unmarked	Unmarked	H3K4me3-only	Unmarked	Unmarked	Unmarked	Unmarked	Unmarked	Unmarked	Unmarked
NM_000607	ORM1	chr9	117085302	117088759	+	Unmarked	Unmarked	Unmarked	H3K27me3-only	H3K27me3-only	Unmarked	Unmarked	Unmarked	Unmarked	Unmarked	Unmarked	Unmarked	Unmarked	Unmarked	Unmarked	Unmarked	Unmarked	Unmarked	Unmarked	Unmarked
NM_000608	ORM2	chr9	117092068	117095536	+	Unmarked	Unmarked	Unmarked	H3K27me3-only	H3K27me3-only	Unmarked	Unmarked	Unmarked	Unmarked	Unmarked	Unmarked	Unmarked	Unmarked	H3K27me3-only	Unmarked	Unmarked	Unmarked	Unmarked	Unmarked	Unmarked
NM_000609	CXCL12	chr10	44865600	44880545	-	Bivalent	Bivalent	Bivalent	Bivalent	Bivalent	Bivalent	Bivalent	Bivalent	H3K27me3-only	Bivalent	H3K27me3-only	H3K27me3-only	Bivalent	Bivalent	H3K27me3-only	H3K4me3-only	H3K4me3-only	H3K4me3-only	H3K4me3-only	H3K4me3-only
NM_000611	CD59	chr11	33724555	33758025	-	H3K4me3-only	Bivalent	H3K4me3-only	H3K4me3-only	H3K4me3-only	H3K4me3-only	H3K4me3-only	H3K4me3-only	H3K4me3-only	H3K4me3-only	H3K4me3-only	H3K4me3-only	H3K4me3-only	H3K4me3-only	H3K4me3-only	H3K4me3-only	H3K4me3-only	H3K4me3-only	H3K4me3-only	H3K4me3-only
NM_000612	IGF2	chr11	2150346	2160204	-	Bivalent	H3K27me3-only	H3K27me3-only	Bivalent	Bivalent	H3K27me3-only	Bivalent	Bivalent	Bivalent	H3K27me3-only	Bivalent	H3K27me3-only	Bivalent	H3K27me3-only	H3K27me3-only	H3K4me3-only	H3K4me3-only	H3K4me3-only	Unmarked	H3K4me3-only
NM_000613	HPX	chr11	6452267	6462254	-	Unmarked	Unmarked	Unmarked	Unmarked	Unmarked	Unmarked	Unmarked	Unmarked	Unmarked	Unmarked	Unmarked	Unmarked	Unmarked	Unmarked	Unmarked	Unmarked	Unmarked	Unmarked	Unmarked	Unmarked
NM_000614	CNTF	chr11	58390145	58393205	+	Unmarked	Unmarked	Unmarked	Unmarked	Unmarked	Unmarked	Unmarked	Unmarked	Unmarked	Unmarked	Unmarked	Unmarked	Unmarked	Unmarked	Unmarked	Unmarked	Unmarked	Unmarked	Unmarked	Unmarked
NM_000617	SLC11A2	chr12	51379774	51420199	-	H3K4me3-only	H3K4me3-only	H3K4me3-only	H3K4me3-only	H3K4me3-only	H3K4me3-only	H3K4me3-only	H3K4me3-only	H3K4me3-only	H3K4me3-only	H3K4me3-only	H3K4me3-only	H3K4me3-only	H3K4me3-only	H3K4me3-only	H3K4me3-only	H3K4me3-only	H3K4me3-only	H3K4me3-only	H3K4me3-only
NM_000619	IFNG	chr12	68548549	68553521	-	Unmarked	Unmarked	Unmarked	Unmarked	Unmarked	Unmarked	Unmarked	Unmarked	Unmarked	Unmarked	Unmarked	Unmarked	Unmarked	Unmarked	Unmarked	Unmarked	Unmarked	Unmarked	Unmarked	Unmarked
NM_000623	BDKRB2	chr14	96671134	96710666	+	Bivalent	Bivalent	Bivalent	Bivalent	Bivalent	H3K27me3-only	H3K4me3-only	H3K4me3-only	H3K4me3-only	H3K4me3-only	H3K27me3-only	H3K4me3-only	H3K4me3-only	H3K4me3-only	Unmarked	H3K4me3-only	H3K4me3-only	Unmarked	Unmarked	H3K4me3-only
NM_000624	SERPINA5	chr14	95047705	95059457	+	Unmarked	Unmarked	Unmarked	Bivalent	H3K27me3-only	Unmarked	Unmarked	Unmarked	Unmarked	Unmarked	Unmarked	Unmarked	Unmarked	Unmarked	Unmarked	Unmarked	Unmarked	Unmarked	Unmarked	H3K4me3-only
NM_000625	NOS2	chr17	26083791	26127555	-	Unmarked	Unmarked	Unmarked	Unmarked	H3K27me3-only	Unmarked	Unmarked	Unmarked	H3K27me3-only	Unmarked	Unmarked	H3K27me3-only	Unmarked	H3K27me3-only	Unmarked	Unmarked	Unmarked	Unmarked	Unmarked	Unmarked
NM_000626	CD79B	chr17	62006097	62009704	-	Unmarked	Unmarked	Unmarked	Bivalent	H3K27me3-only	H3K4me3-only	Unmarked	Unmarked	Unmarked	Unmarked	H3K4me3-only	Unmarked	Unmarked	Unmarked	Unmarked	Unmarked	H3K4me3-only	Unmarked	Unmarked	Unmarked
NM_000628	IL10RB	chr21	34638664	34669539	+	H3K4me3-only	H3K4me3-only	H3K4me3-only	H3K4me3-only	H3K4me3-only	H3K4me3-only	H3K4me3-only	H3K4me3-only	H3K4me3-only	H3K4me3-only	H3K4me3-only	H3K4me3-only	H3K4me3-only	H3K4me3-only	H3K4me3-only	H3K4me3-only	H3K4me3-only	H3K4me3-only	H3K4me3-only	H3K4me3-only
NM_000629	IFNAR1	chr21	34697213	34732128	+	H3K4me3-only	H3K4me3-only	H3K4me3-only	H3K4me3-only	H3K4me3-only	H3K4me3-only	H3K4me3-only	H3K4me3-only	H3K4me3-only	H3K4me3-only	H3K4me3-only	H3K4me3-only	H3K4me3-only	H3K4me3-only	H3K4me3-only	H3K4me3-only	H3K4me3-only	H3K4me3-only	H3K4me3-only	H3K4me3-only
NM_000632	ITGAM	chr16	31271287	31344213	+	Unmarked	Unmarked	H3K27me3-only	Unmarked	Unmarked	H3K4me3-only	Unmarked	Unmarked	Unmarked	Unmarked	H3K4me3-only	Unmarked	Unmarked	Unmarked	Unmarked	Unmarked	Unmarked	Unmarked	Unmarked	Unmarked
NM_000634	CXCR1	chr2	219027567	219031716	-	Unmarked	Unmarked	Unmarked	H3K27me3-only	H3K27me3-only	Unmarked	Unmarked	Unmarked	Unmarked	Unmarked	Unmarked	Unmarked	Unmarked	H3K27me3-only	Unmarked	Unmarked	Unmarked	Unmarked	Unmarked	Unmarked
NM_000635	RFX2	chr19	5993174	6110664	-	Bivalent	Bivalent	Bivalent	H3K4me3-only	H3K4me3-only	H3K4me3-only	H3K4me3-only	H3K4me3-only	H3K4me3-only	H3K4me3-only	H3K4me3-only	H3K4me3-only	H3K4me3-only	H3K4me3-only	H3K4me3-only	H3K4me3-only	H3K4me3-only	H3K4me3-only	H3K4me3-only	H3K4me3-only
NM_000636	SOD2	chr6	160102754	160114353	-	H3K4me3-only	H3K4me3-only	H3K4me3-only	H3K4me3-only	H3K4me3-only	H3K4me3-only	H3K4me3-only	H3K4me3-only	H3K4me3-only	H3K4me3-only	H3K4me3-only	H3K4me3-only	H3K4me3-only	H3K4me3-only	H3K4me3-only	H3K4me3-only	H3K4me3-only	H3K4me3-only	H3K4me3-only	H3K4me3-only
NM_000638	VTN	chr17	26694298	26697373	-	Unmarked	Unmarked	Unmarked	H3K4me3-only	Unmarked	Unmarked	Unmarked	Unmarked	H3K27me3-only	Unmarked	Unmarked	Unmarked	Unmarked	Unmarked	Unmarked	Unmarked	Unmarked	Unmarked	Unmarked	Unmarked
NM_000639	FASLG	chr1	172628184	172636012	+	Unmarked	Unmarked	Unmarked	Unmarked	Unmarked	Unmarked	Unmarked	Unmarked	Unmarked	Unmarked	H3K4me3-only	Unmarked	Unmarked	Unmarked	Unmarked	Unmarked	H3K4me3-only	Unmarked	Unmarked	Unmarked
NM_000640	IL13RA2	chrX	114238537	114252207	-	Unmarked	Unmarked	Unmarked	Unmarked	Unmarked	Unmarked	Unmarked	Unmarked	Unmarked	Unmarked	Unmarked	Unmarked	Unmarked	Unmarked	Unmarked	Unmarked	Unmarked	Unmarked	Unmarked	Unmarked
NM_000642	AGL	chr1	100315639	100389579	+	H3K4me3-only	H3K4me3-only	H3K4me3-only	H3K4me3-only	H3K4me3-only	H3K4me3-only	H3K4me3-only	H3K4me3-only	H3K4me3-only	H3K4me3-only	H3K4me3-only	H3K4me3-only	H3K4me3-only	H3K4me3-only	H3K4me3-only	H3K4me3-only	H3K4me3-only	H3K4me3-only	H3K4me3-only	H3K4me3-only
NM_000643	AGL	chr1	100316044	100389579	+	H3K4me3-only	H3K4me3-only	H3K4me3-only	H3K4me3-only	H3K4me3-only	H3K4me3-only	H3K4me3-only	H3K4me3-only	H3K4me3-only	H3K4me3-only	H3K4me3-only	H3K4me3-only	H3K4me3-only	H3K4me3-only	H3K4me3-only	H3K4me3-only	H3K4me3-only	H3K4me3-only	H3K4me3-only	H3K4me3-only
NM_000645	AGL	chr1	100326765	100389579	+	Unmarked	Unmarked	Unmarked	Unmarked	Unmarked	Unmarked	Unmarked	Unmarked	Unmarked	Unmarked	Unmarked	Unmarked	Unmarked	Unmarked	Unmarked	Unmarked	Unmarked	Unmarked	Unmarked	Unmarked
NM_000646	AGL	chr1	100316530	100389579	+	H3K4me3-only	H3K4me3-only	H3K4me3-only	H3K4me3-only	H3K4me3-only	H3K4me3-only	H3K4me3-only	H3K4me3-only	H3K4me3-only	H3K4me3-only	H3K4me3-only	H3K4me3-only	H3K4me3-only	H3K4me3-only	H3K4me3-only	H3K4me3-only	H3K4me3-only	H3K4me3-only	H3K4me3-only	H3K4me3-only
NM_000651	CR1	chr1	207669472	207815110	+	Bivalent	Bivalent	Bivalent	Bivalent	Bivalent	H3K4me3-only	Bivalent	Bivalent	Bivalent	Bivalent	H3K4me3-only	Bivalent	H3K4me3-only	Bivalent	H3K27me3-only	Unmarked	H3K4me3-only	Unmarked	H3K4me3-only	H3K4me3-only
NM_000655	SELL	chr1	169659805	169680843	-	Unmarked	Unmarked	Unmarked	H3K4me3-only	Unmarked	H3K4me3-only	Unmarked	Unmarked	H3K4me3-only	Unmarked	H3K4me3-only	H3K4me3-only	Unmarked	Unmarked	H3K4me3-only	Unmarked	Unmarked	Unmarked	Unmarked	Unmarked
NM_000657	BCL2	chr18	60985186	60986613	-	Bivalent	Bivalent	Bivalent	H3K4me3-only	H3K4me3-only	H3K4me3-only	H3K4me3-only	H3K4me3-only	Bivalent	H3K4me3-only	H3K4me3-only	Bivalent	H3K4me3-only	H3K4me3-only	H3K4me3-only	H3K4me3-only	H3K4me3-only	H3K4me3-only	H3K4me3-only	H3K4me3-only
NM_000660	TGFB1	chr19	41836811	41859831	-	Bivalent	Bivalent	Bivalent	H3K4me3-only	H3K4me3-only	H3K4me3-only	Bivalent	Bivalent	H3K4me3-only	H3K4me3-only	H3K4me3-only	H3K4me3-only	H3K4me3-only	H3K4me3-only	H3K4me3-only	H3K4me3-only	H3K4me3-only	H3K4me3-only	H3K4me3-only	H3K4me3-only
NM_000661	RPL9	chr4	39455744	39460568	-	H3K4me3-only	H3K4me3-only	H3K4me3-only	H3K4me3-only	H3K4me3-only	H3K4me3-only	H3K4me3-only	H3K4me3-only	H3K4me3-only	H3K4me3-only	H3K4me3-only	H3K4me3-only	H3K4me3-only	H3K4me3-only	H3K4me3-only	H3K4me3-only	H3K4me3-only	H3K4me3-only	H3K4me3-only	H3K4me3-only
NM_000662	NAT1	chr8	18067617	18081198	+	H3K4me3-only	H3K4me3-only	Unmarked	H3K4me3-only	H3K4me3-only	H3K4me3-only	H3K4me3-only	H3K4me3-only	H3K4me3-only	H3K4me3-only	H3K4me3-only	H3K4me3-only	H3K4me3-only	H3K4me3-only	H3K4me3-only	H3K4me3-only	H3K4me3-only	H3K4me3-only	H3K4me3-only	H3K4me3-only
NM_000663	ABAT	chr16	8806825	8878432	+	H3K4me3-only	H3K4me3-only	H3K4me3-only	H3K27me3-only	Unmarked	Unmarked	Unmarked	Unmarked	Unmarked	H3K27me3-only	Unmarked	Unmarked	Unmarked	Unmarked	Unmarked	H3K4me3-only	Unmarked	Unmarked	Unmarked	Unmarked
NM_000666	ACY1	chr3	52017299	52023218	+	H3K4me3-only	H3K4me3-only	H3K4me3-only	H3K4me3-only	H3K4me3-only	H3K4me3-only	H3K4me3-only	H3K4me3-only	H3K4me3-only	H3K4me3-only	H3K4me3-only	H3K4me3-only	H3K4me3-only	H3K4me3-only	H3K4me3-only	H3K4me3-only	H3K4me3-only	H3K4me3-only	H3K4me3-only	H3K4me3-only
NM_000667	ADH1A	chr4	100197522	100212185	-	Unmarked	Unmarked	Unmarked	Unmarked	Unmarked	Unmarked	Unmarked	Unmarked	Unmarked	Unmarked	Unmarked	Unmarked	Unmarked	Unmarked	Unmarked	Unmarked	Unmarked	Unmarked	Unmarked	Unmarked
NM_000668	ADH1B	chr4	100227526	100242572	-	Unmarked	Unmarked	Unmarked	Unmarked	Unmarked	Unmarked	Unmarked	Unmarked	Unmarked	Unmarked	Unmarked	Unmarked	Unmarked	Unmarked	Unmarked	Unmarked	Unmarked	Unmarked	Unmarked	Unmarked
NM_000669	ADH1C	chr4	100257648	100273917	-	Unmarked	Unmarked	Unmarked	Unmarked	Unmarked	Unmarked	Unmarked	Unmarked	Unmarked	Unmarked	Unmarked	Unmarked	Unmarked	Unmarked	Unmarked	Unmarked	Unmarked	Unmarked	Unmarked	Unmarked
NM_000670	ADH4	chr4	100044832	100065449	-	Unmarked	Unmarked	Unmarked	Unmarked	Unmarked	Unmarked	Unmarked	H3K4me3-only	Unmarked	Unmarked	Unmarked	Unmarked	Unmarked	Unmarked	Unmarked	Unmarked	Unmarked	Unmarked	Unmarked	Unmarked
NM_000671	ADH5	chr4	99992129	100009931	-	H3K4me3-only	H3K4me3-only	H3K4me3-only	H3K4me3-only	H3K4me3-only	H3K4me3-only	H3K4me3-only	H3K4me3-only	H3K4me3-only	H3K4me3-only	H3K4me3-only	H3K4me3-only	H3K4me3-only	H3K4me3-only	H3K4me3-only	H3K4me3-only	H3K4me3-only	H3K4me3-only	H3K4me3-only	H3K4me3-only
NM_000672	ADH6	chr4	100125878	100140403	-	Unmarked	Unmarked	Unmarked	Unmarked	Unmarked	Unmarked	Unmarked	Unmarked	Unmarked	Unmarked	Unmarked	Unmarked	Unmarked	Unmarked	Unmarked	Unmarked	Unmarked	Unmarked	Unmarked	Unmarked
NM_000673	ADH7	chr4	100333417	100356667	-	Unmarked	Unmarked	Unmarked	Unmarked	Unmarked	Unmarked	Unmarked	Unmarked	Unmarked	Unmarked	Unmarked	Unmarked	Unmarked	Unmarked	Unmarked	Unmarked	H3K4me3-only	Unmarked	Unmarked	Unmarked
NM_000676	ADORA2B	chr17	15848230	15879210	+	Bivalent	Bivalent	Bivalent	Bivalent	H3K4me3-only	H3K4me3-only	Bivalent	Bivalent	H3K4me3-only	H3K4me3-only	H3K4me3-only	H3K4me3-only	H3K4me3-only	H3K4me3-only	H3K4me3-only	H3K4me3-only	H3K4me3-only	H3K4me3-only	H3K4me3-only	H3K4me3-only
NM_000677	ADORA3	chr1	112042050	112046743	-	Unmarked	Unmarked	Unmarked	H3K27me3-only	H3K27me3-only	Unmarked	Unmarked	Unmarked	H3K27me3-only	Unmarked	Unmarked	Unmarked	Unmarked	Unmarked	Unmarked	Unmarked	Unmarked	Unmarked	Unmarked	Unmarked
NM_000678	ADRA1D	chr20	4201277	4229659	-	Bivalent	Bivalent	Bivalent	Bivalent	Bivalent	Bivalent	H3K27me3-only	H3K27me3-only	Bivalent	Bivalent	H3K27me3-only	Bivalent	Bivalent	H3K4me3-only	Bivalent	H3K4me3-only	H3K4me3-only	H3K4me3-only	H3K4me3-only	H3K4me3-only
NM_000679	ADRA1B	chr5	159343739	159400017	+	Bivalent	Bivalent	Bivalent	H3K4me3-only	H3K4me3-only	Bivalent	Bivalent	Bivalent	H3K4me3-only	H3K4me3-only	Bivalent	H3K4me3-only	H3K4me3-only	Bivalent	Unmarked	H3K4me3-only	Unmarked	H3K4me3-only	H3K4me3-only	H3K4me3-only
NM_000681	ADRA2A	chr10	112836789	112840662	+	Bivalent	Bivalent	Bivalent	Bivalent	Bivalent	Bivalent	Bivalent	Bivalent	Bivalent	Bivalent	Bivalent	Bivalent	Bivalent	Bivalent	Bivalent	H3K4me3-only	H3K4me3-only	H3K4me3-only	H3K4me3-only	H3K4me3-only
NM_000682	ADRA2B	chr2	96778622	96781888	-	Bivalent	Bivalent	Bivalent	Bivalent	Bivalent	Bivalent	H3K27me3-only	H3K27me3-only	Bivalent	Bivalent	H3K4me3-only	Unmarked	H3K4me3-only	H3K27me3-only	H3K27me3-only	H3K4me3-only	H3K4me3-only	H3K4me3-only	H3K4me3-only	H3K4me3-only
NM_000683	ADRA2C	chr4	3768295	3770253	+	Bivalent	Bivalent	Bivalent	Bivalent	Bivalent	Bivalent	H3K27me3-only	H3K27me3-only	H3K27me3-only	H3K27me3-only	H3K27me3-only	H3K27me3-only	Bivalent	H3K27me3-only	H3K27me3-only	H3K4me3-only	H3K4me3-only	H3K4me3-only	Unmarked	H3K4me3-only
NM_000684	ADRB1	chr10	115803805	115806667	+	Bivalent	Bivalent	Bivalent	Bivalent	Bivalent	Bivalent	Bivalent	Bivalent	Bivalent	Bivalent	Bivalent	Bivalent	H3K4me3-only	H3K27me3-only	H3K4me3-only	H3K4me3-only	H3K4me3-only	H3K4me3-only	H3K4me3-only	H3K4me3-only
NM_000686	AGTR2	chrX	115301957	115306225	+	Unmarked	Unmarked	Unmarked	Unmarked	Unmarked	Unmarked	Unmarked	Unmarked	Unmarked	Unmarked	Unmarked	Unmarked	Unmarked	Unmarked	Unmarked	Unmarked	Unmarked	Unmarked	Unmarked	Unmarked
NM_000687	AHCY	chr20	32868070	32891215	-	H3K4me3-only	H3K4me3-only	H3K4me3-only	H3K4me3-only	H3K4me3-only	H3K4me3-only	H3K4me3-only	H3K4me3-only	H3K4me3-only	H3K4me3-only	H3K4me3-only	H3K4me3-only	H3K4me3-only	H3K4me3-only	H3K4me3-only	H3K4me3-only	H3K4me3-only	H3K4me3-only	H3K4me3-only	H3K4me3-only
NM_000688	ALAS1	chr3	52232098	52248343	+	H3K4me3-only	H3K4me3-only	H3K4me3-only	H3K4me3-only	H3K4me3-only	H3K4me3-only	H3K4me3-only	H3K4me3-only	H3K4me3-only	H3K4me3-only	H3K4me3-only	H3K4me3-only	H3K4me3-only	H3K4me3-only	H3K4me3-only	H3K4me3-only	H3K4me3-only	H3K4me3-only	H3K4me3-only	H3K4me3-only
NM_000689	ALDH1A1	chr9	75515577	75568233	-	Unmarked	Unmarked	Unmarked	H3K4me3-only	Unmarked	H3K4me3-only	H3K4me3-only	H3K4me3-only	Unmarked	Unmarked	Unmarked	Unmarked	Unmarked	H3K4me3-only	H3K4me3-only	H3K4me3-only	Unmarked	Unmarked	Unmarked	Unmarked
NM_000691	ALDH3A1	chr17	19641297	19651746	-	Unmarked	Unmarked	Unmarked	Bivalent	H3K27me3-only	Unmarked	Unmarked	Unmarked	H3K4me3-only	Unmarked	Unmarked	Unmarked	Unmarked	H3K27me3-only	Unmarked	Unmarked	H3K4me3-only	Unmarked	Unmarked	Unmarked
NM_000692	ALDH1B1	chr9	38392660	38398662	+	H3K4me3-only	H3K4me3-only	H3K4me3-only	Bivalent	H3K4me3-only	H3K4me3-only	H3K4me3-only	H3K4me3-only	H3K4me3-only	H3K4me3-only	H3K4me3-only	H3K4me3-only	H3K4me3-only	H3K4me3-only	H3K4me3-only	H3K4me3-only	H3K4me3-only	H3K4me3-only	H3K4me3-only	H3K4me3-only
NM_000693	ALDH1A3	chr15	101420008	101456830	+	Bivalent	Bivalent	Bivalent	Bivalent	Bivalent	Bivalent	H3K27me3-only	H3K27me3-only	H3K4me3-only	H3K4me3-only	Bivalent	H3K4me3-only	Bivalent	Bivalent	Bivalent	H3K4me3-only	H3K4me3-only	H3K4me3-only	H3K4me3-only	H3K4me3-only
NM_000695	ALDH3B2	chr11	67429632	67442102	-	Unmarked	Unmarked	H3K27me3-only	H3K27me3-only	Bivalent	Unmarked	Unmarked	Unmarked	Unmarked	Unmarked	Unmarked	Unmarked	Unmarked	H3K27me3-only	Unmarked	Unmarked	H3K4me3-only	Unmarked	Unmarked	Unmarked
NM_000696	ALDH9A1	chr1	165631448	165667900	-	H3K4me3-only	H3K4me3-only	H3K4me3-only	H3K4me3-only	H3K4me3-only	H3K4me3-only	H3K4me3-only	H3K4me3-only	H3K4me3-only	H3K4me3-only	H3K4me3-only	H3K4me3-only	H3K4me3-only	H3K4me3-only	H3K4me3-only	H3K4me3-only	H3K4me3-only	H3K4me3-only	H3K4me3-only	H3K4me3-only
NM_000697	ALOX12	chr17	6899383	6914055	+	Bivalent	Bivalent	Bivalent	Bivalent	H3K4me3-only	H3K4me3-only	Bivalent	Bivalent	H3K4me3-only	Bivalent	Unmarked	H3K4me3-only	H3K4me3-only	Unmarked	Unmarked	Unmarked	H3K4me3-only	Unmarked	Unmarked	Unmarked
NM_000699	AMY2A	chr1	104159998	104168400	+	Unmarked	Unmarked	Unmarked	Unmarked	Unmarked	Unmarked	Unmarked	Unmarked	Unmarked	Unmarked	Unmarked	Unmarked	Unmarked	Unmarked	Unmarked	Unmarked	Unmarked	Unmarked	Unmarked	Unmarked
NM_000700	ANXA1	chr9	75766780	75785307	+	Unmarked	H3K4me3-only	Unmarked	H3K4me3-only	H3K4me3-only	H3K4me3-only	Unmarked	Unmarked	H3K4me3-only	Unmarked	H3K4me3-only	H3K4me3-only	H3K4me3-only	H3K4me3-only	H3K4me3-only	Unmarked	H3K4me3-only	Unmarked	Unmarked	Unmarked
NM_000701	ATP1A1	chr1	116915794	116947396	+	H3K4me3-only	H3K4me3-only	H3K4me3-only	Bivalent	Bivalent	H3K4me3-only	H3K4me3-only	H3K4me3-only	H3K4me3-only	H3K4me3-only	H3K4me3-only	H3K4me3-only	H3K4me3-only	H3K4me3-only	H3K4me3-only	H3K4me3-only	H3K4me3-only	H3K4me3-only	H3K4me3-only	H3K4me3-only
NM_000702	ATP1A2	chr1	160085519	160113374	+	H3K4me3-only	H3K4me3-only	H3K4me3-only	H3K27me3-only	H3K27me3-only	Unmarked	H3K27me3-only	H3K27me3-only	Unmarked	Unmarked	Unmarked	Unmarked	Unmarked	H3K27me3-only	H3K27me3-only	Unmarked	H3K4me3-only	H3K4me3-only	Unmarked	Unmarked
NM_000704	ATP4A	chr19	36041094	36054560	-	Unmarked	Unmarked	H3K27me3-only	H3K27me3-only	H3K27me3-only	Unmarked	H3K27me3-only	Unmarked	Unmarked	Unmarked	Unmarked	Unmarked	Unmarked	H3K27me3-only	Unmarked	Unmarked	Unmarked	Unmarked	Unmarked	Unmarked
NM_000705	ATP4B	chr13	114303121	114312513	-	Unmarked	Unmarked	Unmarked	H3K27me3-only	Bivalent	Unmarked	Unmarked	Unmarked	H3K27me3-only	H3K27me3-only	Unmarked	Unmarked	Unmarked	Unmarked	Unmarked	Unmarked	Unmarked	Unmarked	Unmarked	Unmarked
NM_000706	AVPR1A	chr12	63536538	63546590	-	H3K27me3-only	H3K27me3-only	H3K27me3-only	H3K27me3-only	H3K27me3-only	H3K27me3-only	H3K27me3-only	H3K27me3-only	H3K27me3-only	Unmarked	H3K27me3-only	H3K27me3-only	H3K27me3-only	H3K27me3-only	H3K27me3-only	Unmarked	Unmarked	Unmarked	Unmarked	Unmarked
NM_000707	AVPR1B	chr1	206224282	206231482	+	Bivalent	Bivalent	Bivalent	Bivalent	Bivalent	H3K4me3-only	Bivalent	Bivalent	Bivalent	Bivalent	H3K27me3-only	H3K27me3-only	H3K4me3-only	H3K27me3-only	H3K27me3-only	H3K4me3-only	Unmarked	Unmarked	Unmarked	H3K4me3-only
NM_000710	BDKRB1	chr14	96722546	96731100	+	Unmarked	Unmarked	H3K27me3-only	Unmarked	Unmarked	H3K27me3-only	Unmarked	Unmarked	H3K4me3-only	H3K27me3-only	Unmarked	Unmarked	Unmarked	H3K4me3-only	Unmarked	Unmarked	Unmarked	Unmarked	Unmarked	Unmarked
NM_000712	BLVRA	chr7	43798271	43846941	+	Bivalent	Bivalent	H3K4me3-only	H3K4me3-only	H3K4me3-only	H3K4me3-only	Bivalent	Bivalent	H3K4me3-only	H3K4me3-only	H3K4me3-only	H3K4me3-only	H3K4me3-only	H3K4me3-only	H3K4me3-only	H3K4me3-only	H3K4me3-only	H3K4me3-only	H3K4me3-only	H3K4me3-only
NM_000713	BLVRB	chr19	40953690	40971725	-	Bivalent	Bivalent	Bivalent	Bivalent	Bivalent	H3K4me3-only	Bivalent	H3K4me3-only	Bivalent	H3K4me3-only	H3K4me3-only	H3K4me3-only	H3K4me3-only	H3K4me3-only	H3K4me3-only	H3K4me3-only	H3K4me3-only	H3K4me3-only	H3K4me3-only	H3K4me3-only
NM_000714	TSPO	chr22	43547519	43559248	+	Bivalent	Bivalent	Bivalent	H3K4me3-only	H3K4me3-only	H3K4me3-only	Bivalent	Bivalent	H3K4me3-only	H3K4me3-only	H3K4me3-only	H3K4me3-only	H3K4me3-only	H3K4me3-only	H3K4me3-only	H3K4me3-only	H3K4me3-only	H3K4me3-only	H3K4me3-only	H3K4me3-only
NM_000715	C4BPA	chr1	207277606	207318317	+	Unmarked	Unmarked	Unmarked	Unmarked	Unmarked	Unmarked	Unmarked	Unmarked	Unmarked	Unmarked	Unmarked	Unmarked	Unmarked	Unmarked	Unmarked	Unmarked	Unmarked	Unmarked	Unmarked	Unmarked
NM_000717	CA4	chr17	58227301	58236906	+	Bivalent	Bivalent	Bivalent	Bivalent	Bivalent	Bivalent	H3K27me3-only	H3K27me3-only	H3K27me3-only	Bivalent	H3K27me3-only	Bivalent	H3K27me3-only	H3K27me3-only	H3K27me3-only	H3K4me3-only	H3K4me3-only	H3K4me3-only	Unmarked	H3K4me3-only
NM_000718	CACNA1B	chr9	140772240	141019076	+	Bivalent	Bivalent	Bivalent	Bivalent	Bivalent	Bivalent	H3K27me3-only	H3K27me3-only	H3K27me3-only	H3K27me3-only	H3K27me3-only	H3K27me3-only	H3K27me3-only	Unmarked	Unmarked	H3K4me3-only	Unmarked	Unmarked	Unmarked	Unmarked
NM_000720	CACNA1D	chr3	53529075	53846492	+	Bivalent	Bivalent	Bivalent	Bivalent	Bivalent	Bivalent	H3K4me3-only	Bivalent	Bivalent	Bivalent	Bivalent	Bivalent	H3K4me3-only	Bivalent	H3K27me3-only	H3K4me3-only	H3K4me3-only	Unmarked	Unmarked	H3K4me3-only
NM_000722	CACNA2D1	chr7	81579417	82073031	-	H3K4me3-only	H3K4me3-only	Bivalent	H3K4me3-only	H3K4me3-only	Bivalent	Bivalent	Bivalent	H3K4me3-only	H3K4me3-only	Bivalent	Bivalent	H3K4me3-only	H3K4me3-only	H3K4me3-only	H3K4me3-only	H3K4me3-only	H3K4me3-only	H3K4me3-only	H3K4me3-only
NM_000724	CACNB2	chr10	18549583	18830688	+	Unmarked	Unmarked	Unmarked	Unmarked	Unmarked	Unmarked	Unmarked	Unmarked	Unmarked	H3K27me3-only	Unmarked	Unmarked	Unmarked	Unmarked	Unmarked	H3K4me3-only	Unmarked	Unmarked	Unmarked	Unmarked
NM_000725	CACNB3	chr12	49212253	49222726	+	Bivalent	Bivalent	Bivalent	H3K4me3-only	H3K4me3-only	H3K4me3-only	Bivalent	H3K4me3-only	H3K4me3-only	H3K4me3-only	H3K4me3-only	H3K4me3-only	H3K4me3-only	H3K4me3-only	H3K4me3-only	H3K4me3-only	H3K4me3-only	H3K4me3-only	H3K4me3-only	H3K4me3-only
NM_000726	CACNB4	chr2	152689285	152955593	-	Bivalent	Bivalent	Bivalent	Bivalent	Bivalent	Bivalent	Bivalent	Bivalent	Bivalent	Bivalent	Bivalent	Bivalent	H3K4me3-only	Bivalent	Bivalent	H3K4me3-only	H3K4me3-only	H3K4me3-only	H3K4me3-only	H3K4me3-only
NM_000727	CACNG1	chr17	65040651	65052911	+	Unmarked	Unmarked	Unmarked	H3K27me3-only	H3K27me3-only	Unmarked	Unmarked	Unmarked	H3K27me3-only	H3K27me3-only	Unmarked	Unmarked	Unmarked	Unmarked	Unmarked	Unmarked	Unmarked	Unmarked	Unmarked	Unmarked
NM_000728	CALCB	chr11	15095145	15100177	+	Bivalent	Bivalent	Bivalent	Bivalent	Bivalent	Bivalent	Bivalent	Bivalent	Bivalent	Bivalent	Bivalent	Bivalent	Bivalent	Bivalent	H3K27me3-only	H3K4me3-only	Unmarked	Unmarked	H3K4me3-only	H3K4me3-only
NM_000729	CCK	chr3	42299317	42307662	-	H3K27me3-only	H3K27me3-only	H3K27me3-only	Bivalent	H3K27me3-only	H3K27me3-only	H3K27me3-only	H3K27me3-only	H3K27me3-only	H3K27me3-only	H3K27me3-only	H3K27me3-only	H3K27me3-only	H3K27me3-only	H3K27me3-only	Unmarked	Unmarked	Unmarked	Unmarked	Unmarked
NM_000730	CCKAR	chr4	26483017	26492042	-	Unmarked	Unmarked	Bivalent	H3K27me3-only	H3K27me3-only	Unmarked	H3K27me3-only	H3K27me3-only	H3K27me3-only	Unmarked	Unmarked	H3K27me3-only	Unmarked	H3K27me3-only	Unmarked	Unmarked	Unmarked	Unmarked	Unmarked	Unmarked
NM_000732	CD3D	chr11	118209788	118213459	-	Unmarked	Unmarked	H3K27me3-only	H3K27me3-only	Unmarked	Unmarked	Unmarked	Unmarked	Unmarked	Unmarked	H3K4me3-only	Unmarked	Unmarked	Unmarked	Unmarked	Unmarked	H3K4me3-only	Unmarked	Unmarked	Unmarked
NM_000733	CD3E	chr11	118175294	118186890	+	Unmarked	Unmarked	Unmarked	Unmarked	Unmarked	Unmarked	Unmarked	Unmarked	Unmarked	Unmarked	H3K4me3-only	Unmarked	Unmarked	Unmarked	Unmarked	Unmarked	Unmarked	Unmarked	Unmarked	Unmarked
NM_000734	CD247	chr1	167399876	167487847	-	Unmarked	Unmarked	Unmarked	Unmarked	H3K27me3-only	Unmarked	Unmarked	Unmarked	H3K27me3-only	Unmarked	H3K4me3-only	Unmarked	Unmarked	Unmarked	Unmarked	Unmarked	H3K4me3-only	Unmarked	Unmarked	Unmarked
NM_000735	CGA	chr6	87795215	87804865	-	Unmarked	Unmarked	Unmarked	Unmarked	Unmarked	Unmarked	Unmarked	Unmarked	Unmarked	Unmarked	Unmarked	Unmarked	Unmarked	Unmarked	Unmarked	Unmarked	Unmarked	Unmarked	Unmarked	Unmarked
NM_000737	CGB	chr19	49526125	49527632	-	Unmarked	Unmarked	Unmarked	Unmarked	Unmarked	Unmarked	Unmarked	Unmarked	Unmarked	Unmarked	Unmarked	Unmarked	Unmarked	Unmarked	Unmarked	Unmarked	Unmarked	Unmarked	Unmarked	Unmarked
NM_000738	CHRM1	chr11	62676150	62689012	-	H3K27me3-only	H3K27me3-only	Bivalent	Bivalent	Bivalent	H3K27me3-only	H3K27me3-only	H3K27me3-only	H3K27me3-only	Bivalent	H3K27me3-only	H3K27me3-only	Bivalent	H3K27me3-only	H3K27me3-only	Unmarked	Unmarked	Unmarked	Unmarked	Unmarked
NM_000740	CHRM3	chr1	239792372	240072717	+	Unmarked	Unmarked	Unmarked	Unmarked	Unmarked	Unmarked	Unmarked	Unmarked	Unmarked	Unmarked	Unmarked	Unmarked	Unmarked	Unmarked	Unmarked	Unmarked	Unmarked	Unmarked	Unmarked	Unmarked
NM_000741	CHRM4	chr11	46406639	46408107	-	Unmarked	H3K27me3-only	H3K27me3-only	Bivalent	H3K27me3-only	Unmarked	H3K27me3-only	H3K27me3-only	H3K27me3-only	H3K27me3-only	H3K27me3-only	Unmarked	H3K27me3-only	H3K27me3-only	H3K27me3-only	Unmarked	Unmarked	Unmarked	Unmarked	Unmarked
NM_000742	CHRNA2	chr8	27317277	27336813	-	Unmarked	Unmarked	Unmarked	H3K27me3-only	H3K27me3-only	Unmarked	Unmarked	Unmarked	H3K27me3-only	H3K27me3-only	Unmarked	H3K27me3-only	H3K27me3-only	H3K27me3-only	Unmarked	Unmarked	Unmarked	Unmarked	Unmarked	Unmarked
NM_000745	CHRNA5	chr15	78857861	78887611	+	H3K4me3-only	H3K4me3-only	H3K4me3-only	H3K4me3-only	H3K4me3-only	H3K4me3-only	Bivalent	Bivalent	H3K4me3-only	H3K4me3-only	H3K4me3-only	H3K4me3-only	H3K4me3-only	Bivalent	H3K4me3-only	H3K4me3-only	H3K4me3-only	H3K4me3-only	H3K4me3-only	H3K4me3-only
NM_000746	CHRNA7	chr15	32322685	32462384	+	Bivalent	Bivalent	H3K4me3-only	Bivalent	Bivalent	H3K4me3-only	Bivalent	H3K4me3-only	Bivalent	Bivalent	Bivalent	Bivalent	H3K4me3-only	Bivalent	Bivalent	H3K4me3-only	H3K4me3-only	H3K4me3-only	H3K4me3-only	H3K4me3-only
NM_000747	CHRNB1	chr17	7348405	7360932	+	H3K4me3-only	H3K4me3-only	Bivalent	Bivalent	Bivalent	Bivalent	Bivalent	Bivalent	H3K4me3-only	Bivalent	Bivalent	H3K4me3-only	H3K4me3-only	Bivalent	H3K27me3-only	Unmarked	H3K4me3-only	H3K4me3-only	Unmarked	H3K4me3-only
NM_000748	CHRNB2	chr1	154540256	154552353	+	H3K4me3-only	H3K4me3-only	Bivalent	Bivalent	Bivalent	Bivalent	Bivalent	Bivalent	Bivalent	Bivalent	H3K27me3-only	H3K4me3-only	H3K4me3-only	H3K27me3-only	H3K27me3-only	H3K4me3-only	H3K4me3-only	Unmarked	Unmarked	Unmarked
NM_000749	CHRNB3	chr8	42552561	42592209	+	Unmarked	Unmarked	Unmarked	Unmarked	Unmarked	Unmarked	Unmarked	Unmarked	Unmarked	Unmarked	Unmarked	Unmarked	Unmarked	Unmarked	Unmarked	Unmarked	Unmarked	Unmarked	Unmarked	Unmarked
NM_000751	CHRND	chr2	233390869	233401375	+	H3K27me3-only	H3K27me3-only	H3K27me3-only	H3K27me3-only	H3K27me3-only	H3K27me3-only	H3K27me3-only	H3K27me3-only	H3K27me3-only	Unmarked	H3K27me3-only	H3K27me3-only	Unmarked	H3K27me3-only	Unmarked	Unmarked	Unmarked	Unmarked	Unmarked	Unmarked
NM_000754	COMT	chr22	19929262	19957498	+	H3K4me3-only	H3K4me3-only	H3K4me3-only	H3K4me3-only	H3K4me3-only	H3K4me3-only	H3K4me3-only	H3K4me3-only	H3K4me3-only	H3K4me3-only	H3K4me3-only	H3K4me3-only	H3K4me3-only	H3K4me3-only	H3K4me3-only	H3K4me3-only	H3K4me3-only	H3K4me3-only	H3K4me3-only	H3K4me3-only
NM_000756	CRH	chr8	67088611	67090846	-	Bivalent	Bivalent	Bivalent	H3K27me3-only	H3K27me3-only	H3K27me3-only	H3K27me3-only	H3K27me3-only	H3K27me3-only	H3K27me3-only	H3K27me3-only	H3K27me3-only	H3K27me3-only	H3K27me3-only	Unmarked	H3K4me3-only	Unmarked	Unmarked	Unmarked	Unmarked
NM_000757	CSF1	chr1	110453232	110473616	+	Bivalent	Bivalent	Bivalent	H3K4me3-only	Bivalent	Bivalent	Bivalent	H3K4me3-only	Bivalent	H3K4me3-only	Bivalent	H3K4me3-only	H3K4me3-only	H3K4me3-only	H3K4me3-only	H3K4me3-only	H3K4me3-only	H3K4me3-only	H3K4me3-only	H3K4me3-only
NM_000758	CSF2	chr5	131409484	131411863	+	Unmarked	Unmarked	Unmarked	Unmarked	H3K4me3-only	Unmarked	Unmarked	Unmarked	H3K4me3-only	Unmarked	Unmarked	H3K4me3-only	Unmarked	Unmarked	Unmarked	Unmarked	Unmarked	Unmarked	Unmarked	Unmarked
NM_000761	CYP1A2	chr15	75041183	75048941	+	Unmarked	H3K27me3-only	H3K27me3-only	H3K27me3-only	Bivalent	Unmarked	Unmarked	Unmarked	Unmarked	Unmarked	Unmarked	Unmarked	Unmarked	H3K27me3-only	Unmarked	Unmarked	Unmarked	Unmarked	Unmarked	Unmarked
NM_000762	CYP2A6	chr19	41349442	41356352	-	H3K27me3-only	H3K27me3-only	H3K27me3-only	H3K27me3-only	H3K27me3-only	H3K27me3-only	Unmarked	Unmarked	H3K27me3-only	H3K27me3-only	H3K27me3-only	H3K27me3-only	H3K27me3-only	H3K27me3-only	Unmarked	Unmarked	Unmarked	Unmarked	Unmarked	Unmarked
NM_000765	CYP3A7	chr7	99302659	99332819	-	Unmarked	Unmarked	Unmarked	Unmarked	Unmarked	Unmarked	Unmarked	Unmarked	Unmarked	Unmarked	Unmarked	Unmarked	Unmarked	Unmarked	Unmarked	Unmarked	Unmarked	Unmarked	Unmarked	Unmarked
NM_000766	CYP2A13	chr19	41594355	41602100	+	H3K27me3-only	H3K27me3-only	H3K27me3-only	H3K27me3-only	H3K27me3-only	H3K27me3-only	H3K27me3-only	H3K27me3-only	H3K27me3-only	H3K27me3-only	H3K27me3-only	H3K27me3-only	H3K27me3-only	H3K27me3-only	Unmarked	Unmarked	Unmarked	Unmarked	Unmarked	Unmarked
NM_000767	CYP2B6	chr19	41497203	41524301	+	Unmarked	Unmarked	Unmarked	Unmarked	Unmarked	Unmarked	Unmarked	Unmarked	Unmarked	Unmarked	Unmarked	Unmarked	Unmarked	Unmarked	Unmarked	Unmarked	Unmarked	Unmarked	Unmarked	Unmarked
NM_000769	CYP2C19	chr10	96522462	96612671	+	Unmarked	Unmarked	Unmarked	Unmarked	Unmarked	Unmarked	H3K4me3-only	H3K4me3-only	Unmarked	Unmarked	Unmarked	Unmarked	Unmarked	Unmarked	Unmarked	Unmarked	Unmarked	Unmarked	Unmarked	Unmarked
NM_000770	CYP2C8	chr10	96796528	96829254	-	Unmarked	Unmarked	Unmarked	Unmarked	Unmarked	Unmarked	Unmarked	Unmarked	Unmarked	Unmarked	Unmarked	Unmarked	Unmarked	Unmarked	Unmarked	Unmarked	Unmarked	Unmarked	Unmarked	Unmarked
NM_000771	CYP2C9	chr10	96698414	96749148	+	Unmarked	Unmarked	Unmarked	Unmarked	Unmarked	Unmarked	Unmarked	Unmarked	Unmarked	Unmarked	Unmarked	Unmarked	Unmarked	Unmarked	Unmarked	Unmarked	Unmarked	Unmarked	Unmarked	Unmarked
NM_000773	CYP2E1	chr10	135340866	135352620	+	Unmarked	Unmarked	H3K27me3-only	H3K27me3-only	H3K27me3-only	H3K27me3-only	H3K27me3-only	H3K27me3-only	H3K27me3-only	H3K27me3-only	H3K27me3-only	H3K27me3-only	H3K27me3-only	H3K27me3-only	H3K27me3-only	Unmarked	H3K4me3-only	Unmarked	Unmarked	Unmarked
NM_000774	CYP2F1	chr19	41620352	41634281	+	Unmarked	Unmarked	Unmarked	H3K27me3-only	H3K27me3-only	Unmarked	Unmarked	Unmarked	Unmarked	H3K27me3-only	Unmarked	Unmarked	H3K27me3-only	H3K27me3-only	Unmarked	Unmarked	Unmarked	Unmarked	Unmarked	Unmarked
NM_000775	CYP2J2	chr1	60358979	60392423	-	Bivalent	Bivalent	H3K4me3-only	H3K4me3-only	H3K4me3-only	H3K4me3-only	H3K4me3-only	H3K4me3-only	H3K4me3-only	H3K4me3-only	H3K4me3-only	H3K4me3-only	H3K4me3-only	Bivalent	Bivalent	H3K4me3-only	H3K4me3-only	H3K4me3-only	H3K4me3-only	H3K4me3-only
NM_000778	CYP4A11	chr1	47394845	47407156	-	Unmarked	Unmarked	Unmarked	Unmarked	Unmarked	H3K27me3-only	Unmarked	Unmarked	H3K27me3-only	Unmarked	Unmarked	H3K27me3-only	H3K27me3-only	Unmarked	Unmarked	Unmarked	Unmarked	Unmarked	Unmarked	Unmarked
NM_000780	CYP7A1	chr8	59402736	59412720	-	Unmarked	Unmarked	Unmarked	Unmarked	Unmarked	Unmarked	Unmarked	Unmarked	Unmarked	Unmarked	Unmarked	Unmarked	Unmarked	Unmarked	Unmarked	Unmarked	Unmarked	Unmarked	Unmarked	Unmarked
NM_000781	CYP11A1	chr15	74630102	74660081	-	Unmarked	H3K27me3-only	H3K27me3-only	H3K27me3-only	H3K27me3-only	Unmarked	H3K27me3-only	H3K27me3-only	H3K27me3-only	H3K27me3-only	H3K27me3-only	H3K27me3-only	Unmarked	H3K27me3-only	Unmarked	Unmarked	Unmarked	Unmarked	Unmarked	Unmarked
NM_000783	CYP26A1	chr10	94833646	94837641	+	Bivalent	Bivalent	Bivalent	Bivalent	Bivalent	Bivalent	Bivalent	Bivalent	Bivalent	Bivalent	Bivalent	Bivalent	H3K4me3-only	Bivalent	Bivalent	H3K4me3-only	H3K4me3-only	Unmarked	H3K4me3-only	Unmarked
NM_000784	CYP27A1	chr2	219646471	219680016	+	Bivalent	Bivalent	Bivalent	H3K4me3-only	H3K4me3-only	Bivalent	H3K4me3-only	H3K4me3-only	Unmarked	H3K4me3-only	Bivalent	Unmarked	H3K4me3-only	H3K4me3-only	H3K4me3-only	H3K4me3-only	H3K4me3-only	H3K4me3-only	H3K4me3-only	H3K4me3-only
NM_000785	CYP27B1	chr12	58156116	58160976	-	Bivalent	Bivalent	H3K27me3-only	Bivalent	Bivalent	H3K27me3-only	H3K27me3-only	H3K27me3-only	H3K4me3-only	H3K4me3-only	H3K27me3-only	H3K4me3-only	H3K4me3-only	Bivalent	H3K27me3-only	Unmarked	H3K4me3-only	Unmarked	Unmarked	Unmarked
NM_000786	CYP51A1	chr7	91741462	91763840	-	H3K4me3-only	H3K4me3-only	Bivalent	H3K4me3-only	H3K4me3-only	H3K4me3-only	H3K4me3-only	H3K4me3-only	H3K4me3-only	H3K4me3-only	H3K4me3-only	H3K4me3-only	H3K4me3-only	H3K4me3-only	H3K4me3-only	H3K4me3-only	H3K4me3-only	H3K4me3-only	H3K4me3-only	H3K4me3-only
NM_000787	DBH	chr9	136501484	136524466	+	Unmarked	Unmarked	H3K27me3-only	H3K27me3-only	H3K27me3-only	Unmarked	H3K27me3-only	Unmarked	H3K27me3-only	H3K27me3-only	Unmarked	Unmarked	Unmarked	H3K27me3-only	Unmarked	Unmarked	Unmarked	Unmarked	Unmarked	Unmarked
NM_000788	DCK	chr4	71859264	71896629	+	H3K4me3-only	H3K4me3-only	H3K4me3-only	H3K4me3-only	H3K4me3-only	H3K4me3-only	H3K4me3-only	H3K4me3-only	H3K4me3-only	H3K4me3-only	H3K4me3-only	H3K4me3-only	H3K4me3-only	H3K4me3-only	H3K4me3-only	H3K4me3-only	H3K4me3-only	H3K4me3-only	H3K4me3-only	H3K4me3-only
NM_000789	ACE	chr17	61554421	61575741	+	Bivalent	Bivalent	Bivalent	Bivalent	Bivalent	H3K4me3-only	Bivalent	H3K4me3-only	Bivalent	Bivalent	Bivalent	H3K4me3-only	H3K4me3-only	Bivalent	H3K4me3-only	H3K4me3-only	H3K4me3-only	H3K4me3-only	H3K4me3-only	H3K4me3-only
NM_000791	DHFR	chr5	79922044	79950800	-	H3K4me3-only	H3K4me3-only	H3K4me3-only	H3K4me3-only	H3K4me3-only	H3K4me3-only	H3K4me3-only	H3K4me3-only	H3K4me3-only	H3K4me3-only	H3K4me3-only	H3K4me3-only	H3K4me3-only	H3K4me3-only	H3K4me3-only	H3K4me3-only	H3K4me3-only	H3K4me3-only	H3K4me3-only	H3K4me3-only
NM_000793	DIO2	chr14	80663867	80697397	-	Unmarked	Unmarked	Unmarked	Unmarked	Unmarked	Unmarked	Unmarked	Unmarked	Unmarked	Unmarked	Unmarked	Unmarked	Unmarked	Unmarked	Unmarked	Unmarked	Unmarked	Unmarked	Unmarked	Unmarked
NM_000794	DRD1	chr5	174867674	174871163	-	Bivalent	Bivalent	Bivalent	Bivalent	Bivalent	H3K27me3-only	H3K27me3-only	H3K27me3-only	H3K27me3-only	H3K27me3-only	Bivalent	H3K27me3-only	Bivalent	Bivalent	Unmarked	Unmarked	Unmarked	Unmarked	H3K4me3-only	Unmarked
NM_000797	DRD4	chr11	637304	640705	+	Bivalent	Bivalent	Bivalent	Bivalent	Bivalent	Bivalent	H3K27me3-only	H3K27me3-only	H3K27me3-only	Bivalent	H3K27me3-only	H3K27me3-only	Bivalent	H3K27me3-only	H3K27me3-only	Unmarked	H3K4me3-only	Unmarked	H3K4me3-only	Unmarked
NM_000798	DRD5	chr4	9783257	9785633	+	Bivalent	Bivalent	Bivalent	H3K27me3-only	H3K27me3-only	H3K27me3-only	H3K27me3-only	H3K27me3-only	H3K27me3-only	H3K27me3-only	H3K27me3-only	H3K27me3-only	H3K27me3-only	Unmarked	Unmarked	Unmarked	Unmarked	Unmarked	Unmarked	Unmarked
NM_000799	EPO	chr7	100318422	100321323	+	Bivalent	Bivalent	H3K27me3-only	Bivalent	Bivalent	Bivalent	H3K27me3-only	H3K27me3-only	Bivalent	Bivalent	H3K27me3-only	Bivalent	Bivalent	H3K27me3-only	H3K27me3-only	Unmarked	Unmarked	Unmarked	Unmarked	H3K4me3-only
NM_000802	FOLR1	chr11	71900958	71907367	+	Unmarked	Unmarked	Unmarked	H3K27me3-only	Bivalent	Unmarked	Unmarked	Unmarked	Unmarked	Unmarked	Unmarked	Unmarked	Unmarked	Unmarked	Unmarked	Unmarked	Unmarked	Unmarked	Unmarked	Unmarked
NM_000804	FOLR3	chr11	71846770	71850934	+	Unmarked	Unmarked	H3K27me3-only	Unmarked	Unmarked	Unmarked	Unmarked	Unmarked	Unmarked	Unmarked	Unmarked	Unmarked	Unmarked	Unmarked	Unmarked	Unmarked	Unmarked	Unmarked	Unmarked	Unmarked
NM_000805	GAST	chr17	39868577	39872221	+	H3K27me3-only	H3K27me3-only	Unmarked	H3K27me3-only	H3K27me3-only	Unmarked	H3K27me3-only	Unmarked	Unmarked	Unmarked	Unmarked	Unmarked	Unmarked	H3K27me3-only	Unmarked	Unmarked	Unmarked	Unmarked	Unmarked	Unmarked
NM_000806	GABRA1	chr5	161274196	161326965	+	Bivalent	Bivalent	H3K4me3-only	Unmarked	Unmarked	H3K27me3-only	H3K27me3-only	H3K27me3-only	Unmarked	Unmarked	Unmarked	Unmarked	H3K27me3-only	Unmarked	Unmarked	Unmarked	Unmarked	Unmarked	Unmarked	Unmarked
NM_000807	GABRA2	chr4	46251580	46392056	-	Bivalent	Bivalent	Bivalent	Unmarked	Unmarked	Bivalent	Bivalent	Bivalent	Bivalent	Bivalent	H3K27me3-only	Bivalent	Bivalent	Unmarked	Unmarked	H3K4me3-only	H3K4me3-only	Unmarked	Unmarked	H3K4me3-only
NM_000808	GABRA3	chrX	151335633	151619831	-	H3K4me3-only	H3K4me3-only	H3K4me3-only	Unmarked	Unmarked	H3K27me3-only	Unmarked	Unmarked	Unmarked	Unmarked	Unmarked	Unmarked	H3K27me3-only	Unmarked	Unmarked	Unmarked	Unmarked	Unmarked	Unmarked	Unmarked
NM_000809	GABRA4	chr4	46920916	46996424	-	Bivalent	Bivalent	Bivalent	Bivalent	H3K27me3-only	Bivalent	Bivalent	Bivalent	H3K27me3-only	Bivalent	H3K27me3-only	H3K27me3-only	Bivalent	H3K27me3-only	H3K27me3-only	Unmarked	H3K4me3-only	H3K4me3-only	Unmarked	Unmarked
NM_000810	GABRA5	chr15	27111865	27194357	+	Bivalent	Bivalent	Bivalent	H3K27me3-only	H3K27me3-only	H3K27me3-only	H3K27me3-only	H3K27me3-only	H3K27me3-only	H3K27me3-only	H3K27me3-only	H3K27me3-only	H3K27me3-only	H3K27me3-only	Unmarked	Unmarked	Unmarked	Unmarked	Unmarked	Unmarked
NM_000811	GABRA6	chr5	161112657	161129598	+	Unmarked	Unmarked	Unmarked	Unmarked	Unmarked	Unmarked	Unmarked	Unmarked	Unmarked	Unmarked	Unmarked	Unmarked	Unmarked	Unmarked	Unmarked	Unmarked	Unmarked	Unmarked	Unmarked	Unmarked
NM_000812	GABRB1	chr4	47033294	47428447	+	H3K4me3-only	Bivalent	H3K4me3-only	H3K4me3-only	H3K4me3-only	Bivalent	Bivalent	H3K4me3-only	Bivalent	H3K4me3-only	Bivalent	Bivalent	H3K4me3-only	Bivalent	Bivalent	H3K4me3-only	Unmarked	H3K4me3-only	Unmarked	Unmarked
NM_000814	GABRB3	chr15	26788693	27018223	-	H3K4me3-only	H3K4me3-only	Bivalent	Bivalent	Bivalent	Bivalent	H3K27me3-only	H3K27me3-only	H3K27me3-only	Bivalent	H3K27me3-only	H3K27me3-only	Bivalent	H3K27me3-only	Unmarked	H3K4me3-only	H3K4me3-only	H3K4me3-only	H3K4me3-only	H3K4me3-only
NM_000815	GABRD	chr1	1950767	1962192	+	Bivalent	Bivalent	Bivalent	Bivalent	Bivalent	Bivalent	H3K27me3-only	H3K27me3-only	H3K27me3-only	H3K27me3-only	H3K27me3-only	H3K27me3-only	Bivalent	H3K27me3-only	H3K27me3-only	Unmarked	Unmarked	Unmarked	Unmarked	Unmarked
NM_000820	GAS6	chr13	114523521	114567046	-	Bivalent	Bivalent	Bivalent	H3K4me3-only	H3K4me3-only	Bivalent	Bivalent	Bivalent	H3K4me3-only	Bivalent	Bivalent	H3K4me3-only	H3K4me3-only	H3K4me3-only	H3K4me3-only	H3K4me3-only	H3K4me3-only	H3K4me3-only	H3K4me3-only	H3K4me3-only
NM_000823	GHRHR	chr7	31003635	31019146	+	Unmarked	Unmarked	Unmarked	H3K27me3-only	H3K27me3-only	Unmarked	Unmarked	Unmarked	H3K27me3-only	H3K27me3-only	Unmarked	Unmarked	Unmarked	H3K27me3-only	Unmarked	Unmarked	Unmarked	Unmarked	Unmarked	Unmarked
NM_000831	GRIK3	chr1	37261127	37499844	-	Bivalent	Bivalent	Bivalent	H3K27me3-only	H3K27me3-only	H3K27me3-only	H3K27me3-only	H3K27me3-only	H3K27me3-only	H3K27me3-only	H3K27me3-only	H3K27me3-only	Bivalent	H3K27me3-only	H3K27me3-only	Unmarked	Unmarked	Unmarked	Unmarked	Unmarked
NM_000833	GRIN2A	chr16	9847264	10276611	-	Bivalent	Bivalent	Bivalent	Bivalent	Bivalent	Bivalent	H3K27me3-only	H3K27me3-only	Bivalent	H3K27me3-only	H3K27me3-only	Bivalent	Bivalent	Bivalent	H3K27me3-only	H3K4me3-only	H3K4me3-only	Unmarked	Unmarked	Unmarked
NM_000834	GRIN2B	chr12	13714409	14133022	-	Bivalent	Bivalent	Bivalent	H3K27me3-only	H3K27me3-only	H3K27me3-only	H3K27me3-only	H3K27me3-only	H3K27me3-only	Unmarked	H3K27me3-only	H3K27me3-only	H3K27me3-only	H3K27me3-only	H3K27me3-only	Unmarked	Unmarked	Unmarked	Unmarked	Unmarked
NM_000835	GRIN2C	chr17	72838161	72856007	-	Bivalent	Bivalent	Bivalent	Bivalent	Bivalent	Bivalent	H3K27me3-only	H3K27me3-only	H3K27me3-only	Bivalent	H3K27me3-only	H3K27me3-only	Bivalent	H3K27me3-only	H3K27me3-only	Unmarked	Unmarked	Unmarked	Unmarked	Unmarked
NM_000836	GRIN2D	chr19	48898131	48948188	+	Bivalent	Bivalent	Bivalent	Bivalent	Bivalent	Bivalent	H3K27me3-only	H3K27me3-only	H3K27me3-only	Bivalent	H3K27me3-only	H3K27me3-only	H3K4me3-only	H3K27me3-only	H3K27me3-only	Unmarked	Unmarked	Unmarked	Unmarked	Unmarked
NM_000837	GRINA	chr8	145064225	145067583	+	H3K4me3-only	H3K4me3-only	H3K4me3-only	H3K4me3-only	H3K4me3-only	H3K4me3-only	H3K4me3-only	H3K4me3-only	H3K4me3-only	H3K4me3-only	H3K4me3-only	H3K4me3-only	H3K4me3-only	H3K4me3-only	H3K4me3-only	H3K4me3-only	H3K4me3-only	H3K4me3-only	H3K4me3-only	H3K4me3-only
NM_000839	GRM2	chr3	51741080	51752625	+	Bivalent	Bivalent	Bivalent	Bivalent	Bivalent	H3K4me3-only	Bivalent	H3K27me3-only	Bivalent	H3K4me3-only	Unmarked	H3K4me3-only	H3K4me3-only	Unmarked	Unmarked	Unmarked	Unmarked	Unmarked	Unmarked	Unmarked
NM_000840	GRM3	chr7	86273229	86494192	+	Bivalent	Bivalent	Bivalent	Unmarked	Unmarked	Bivalent	H3K27me3-only	H3K27me3-only	Bivalent	Bivalent	H3K27me3-only	H3K27me3-only	Bivalent	H3K27me3-only	H3K27me3-only	Unmarked	Unmarked	Unmarked	Unmarked	Unmarked
NM_000842	GRM5	chr11	88237743	88796816	-	Bivalent	Bivalent	Bivalent	H3K27me3-only	H3K27me3-only	H3K27me3-only	H3K27me3-only	H3K27me3-only	H3K27me3-only	H3K27me3-only	Unmarked	H3K27me3-only	H3K27me3-only	Unmarked	H3K27me3-only	Unmarked	Unmarked	Unmarked	Unmarked	Unmarked
NM_000843	GRM6	chr5	178405329	178422124	-	Bivalent	Bivalent	Bivalent	Bivalent	Bivalent	Bivalent	H3K27me3-only	H3K27me3-only	H3K27me3-only	H3K27me3-only	H3K27me3-only	Unmarked	Bivalent	Unmarked	Unmarked	Unmarked	Unmarked	Unmarked	Unmarked	Unmarked
NM_000846	GSTA2	chr6	52614884	52628361	-	Unmarked	Unmarked	Unmarked	Unmarked	Unmarked	Unmarked	Unmarked	H3K4me3-only	Unmarked	Unmarked	Unmarked	Unmarked	Unmarked	Unmarked	Unmarked	Unmarked	Unmarked	Unmarked	Unmarked	Unmarked
NM_000847	GSTA3	chr6	52761438	52774496	-	Unmarked	Unmarked	Unmarked	Unmarked	Unmarked	Unmarked	Unmarked	Unmarked	Unmarked	Unmarked	Unmarked	Unmarked	Unmarked	Unmarked	Unmarked	Unmarked	Unmarked	Unmarked	Unmarked	Unmarked
NM_000848	GSTM2	chr1	110210643	110217908	+	H3K4me3-only	H3K4me3-only	H3K4me3-only	H3K4me3-only	H3K4me3-only	H3K4me3-only	H3K4me3-only	H3K4me3-only	H3K4me3-only	H3K4me3-only	H3K4me3-only	H3K4me3-only	H3K4me3-only	H3K4me3-only	H3K4me3-only	H3K4me3-only	H3K4me3-only	H3K4me3-only	H3K4me3-only	H3K4me3-only
NM_000850	GSTM4	chr1	110198697	110204331	+	H3K4me3-only	Bivalent	Bivalent	Bivalent	H3K4me3-only	H3K4me3-only	H3K4me3-only	H3K4me3-only	H3K4me3-only	H3K4me3-only	H3K4me3-only	H3K4me3-only	H3K4me3-only	H3K4me3-only	H3K4me3-only	H3K4me3-only	H3K4me3-only	H3K4me3-only	H3K4me3-only	H3K4me3-only
NM_000851	GSTM5	chr1	110254863	110260890	+	H3K4me3-only	Unmarked	H3K4me3-only	Bivalent	Bivalent	H3K4me3-only	H3K4me3-only	H3K4me3-only	H3K4me3-only	H3K4me3-only	H3K4me3-only	Unmarked	Unmarked	Unmarked	Unmarked	Unmarked	H3K4me3-only	H3K4me3-only	Unmarked	Unmarked
NM_000852	GSTP1	chr11	67351065	67354124	+	H3K4me3-only	H3K4me3-only	Bivalent	H3K4me3-only	H3K4me3-only	H3K4me3-only	H3K4me3-only	H3K4me3-only	H3K4me3-only	H3K4me3-only	H3K4me3-only	H3K4me3-only	H3K4me3-only	H3K4me3-only	H3K4me3-only	H3K4me3-only	H3K4me3-only	H3K4me3-only	H3K4me3-only	H3K4me3-only
NM_000853	GSTT1	chr22	24376138	24384284	-	H3K4me3-only	H3K4me3-only	Unmarked	H3K4me3-only	H3K4me3-only	H3K4me3-only	Unmarked	Unmarked	H3K4me3-only	H3K4me3-only	H3K4me3-only	H3K4me3-only	H3K4me3-only	H3K4me3-only	H3K4me3-only	H3K4me3-only	H3K4me3-only	H3K4me3-only	H3K4me3-only	H3K4me3-only
NM_000856	GUCY1A3	chr4	156587861	156658214	+	Bivalent	Bivalent	Bivalent	H3K4me3-only	H3K4me3-only	H3K4me3-only	H3K4me3-only	Bivalent	Bivalent	H3K4me3-only	H3K4me3-only	Bivalent	H3K4me3-only	H3K4me3-only	Bivalent	H3K4me3-only	H3K4me3-only	H3K4me3-only	H3K4me3-only	H3K4me3-only
NM_000857	GUCY1B3	chr4	156680125	156728783	+	Bivalent	Bivalent	H3K4me3-only	H3K4me3-only	H3K4me3-only	H3K4me3-only	H3K4me3-only	Bivalent	Bivalent	H3K4me3-only	H3K4me3-only	H3K4me3-only	H3K4me3-only	H3K4me3-only	H3K4me3-only	H3K4me3-only	H3K4me3-only	H3K4me3-only	H3K4me3-only	H3K4me3-only
NM_000859	HMGCR	chr5	74632992	74657926	+	H3K4me3-only	H3K4me3-only	H3K4me3-only	H3K4me3-only	H3K4me3-only	H3K4me3-only	H3K4me3-only	H3K4me3-only	H3K4me3-only	H3K4me3-only	H3K4me3-only	H3K4me3-only	H3K4me3-only	H3K4me3-only	H3K4me3-only	H3K4me3-only	H3K4me3-only	H3K4me3-only	H3K4me3-only	H3K4me3-only
NM_000861	HRH1	chr3	11294384	11304939	+	Unmarked	Unmarked	H3K27me3-only	H3K27me3-only	Unmarked	Unmarked	Unmarked	H3K27me3-only	Unmarked	Unmarked	Unmarked	Unmarked	Unmarked	Unmarked	Unmarked	Unmarked	Unmarked	Unmarked	Unmarked	Unmarked
NM_000862	HSD3B1	chr1	120049825	120057681	+	Unmarked	Unmarked	Unmarked	Unmarked	Unmarked	Unmarked	Unmarked	Unmarked	Unmarked	Unmarked	Unmarked	Unmarked	Unmarked	Unmarked	Unmarked	Unmarked	Unmarked	Unmarked	Unmarked	Unmarked
NM_000863	HTR1B	chr6	78171947	78173120	-	Bivalent	Bivalent	Bivalent	Bivalent	Bivalent	Bivalent	Bivalent	Bivalent	Bivalent	Bivalent	H3K27me3-only	H3K4me3-only	Bivalent	Bivalent	H3K4me3-only	H3K4me3-only	H3K4me3-only	Unmarked	H3K4me3-only	H3K4me3-only
NM_000864	HTR1D	chr1	23518387	23521222	-	Unmarked	Unmarked	Unmarked	Bivalent	Unmarked	Unmarked	Unmarked	Unmarked	Unmarked	Unmarked	Unmarked	Unmarked	Unmarked	Unmarked	Unmarked	Unmarked	Unmarked	Unmarked	Unmarked	Unmarked
NM_000865	HTR1E	chr6	87647023	87726397	+	Bivalent	Bivalent	Bivalent	H3K4me3-only	H3K4me3-only	Bivalent	Bivalent	Bivalent	H3K27me3-only	H3K27me3-only	H3K27me3-only	Bivalent	Bivalent	Unmarked	H3K27me3-only	H3K4me3-only	H3K4me3-only	Unmarked	H3K4me3-only	H3K4me3-only
NM_000866	HTR1F	chr3	88031725	88042919	+	Unmarked	Unmarked	Unmarked	Unmarked	Unmarked	Unmarked	Unmarked	Unmarked	Unmarked	Unmarked	Unmarked	Unmarked	Unmarked	Unmarked	Unmarked	Unmarked	Unmarked	Unmarked	Unmarked	Unmarked
NM_000867	HTR2B	chr2	231972949	231989824	-	Unmarked	Unmarked	Unmarked	Unmarked	Unmarked	Unmarked	Unmarked	Unmarked	Unmarked	H3K4me3-only	Unmarked	Unmarked	Unmarked	H3K4me3-only	Unmarked	Unmarked	Unmarked	Unmarked	Unmarked	Unmarked
NM_000870	HTR4	chr5	147861114	148033739	-	Bivalent	Bivalent	Bivalent	H3K27me3-only	Bivalent	Bivalent	H3K4me3-only	H3K4me3-only	H3K27me3-only	H3K27me3-only	H3K27me3-only	H3K27me3-only	H3K27me3-only	H3K27me3-only	H3K27me3-only	Unmarked	Unmarked	H3K4me3-only	Unmarked	Unmarked
NM_000871	HTR6	chr1	19991779	20006055	+	Bivalent	Bivalent	Bivalent	Bivalent	Bivalent	Bivalent	H3K27me3-only	H3K27me3-only	H3K27me3-only	Bivalent	Bivalent	Bivalent	Bivalent	H3K27me3-only	H3K27me3-only	H3K4me3-only	Unmarked	Unmarked	Unmarked	Unmarked
NM_000873	ICAM2	chr17	62079954	62084283	-	Unmarked	Unmarked	Unmarked	Unmarked	H3K27me3-only	H3K4me3-only	Unmarked	Unmarked	Unmarked	Unmarked	Unmarked	Unmarked	Unmarked	Unmarked	H3K4me3-only	Unmarked	Unmarked	H3K4me3-only	Unmarked	Unmarked
NM_000875	IGF1R	chr15	99192760	99507759	+	H3K4me3-only	H3K4me3-only	Bivalent	Bivalent	H3K4me3-only	Bivalent	H3K4me3-only	H3K4me3-only	H3K4me3-only	H3K4me3-only	H3K4me3-only	H3K4me3-only	H3K4me3-only	H3K4me3-only	H3K4me3-only	H3K4me3-only	H3K4me3-only	H3K4me3-only	H3K4me3-only	H3K4me3-only
NM_000876	IGF2R	chr6	160390130	160527583	+	H3K4me3-only	H3K4me3-only	Bivalent	H3K4me3-only	H3K4me3-only	Bivalent	H3K4me3-only	H3K4me3-only	H3K4me3-only	H3K4me3-only	H3K4me3-only	H3K4me3-only	H3K4me3-only	H3K4me3-only	H3K4me3-only	H3K4me3-only	H3K4me3-only	H3K4me3-only	H3K4me3-only	H3K4me3-only
NM_000877	IL1R1	chr2	102770401	102796334	+	Unmarked	Unmarked	Unmarked	Unmarked	Unmarked	Unmarked	Unmarked	Unmarked	Unmarked	Unmarked	Unmarked	Unmarked	Unmarked	Unmarked	Unmarked	Unmarked	Unmarked	Unmarked	Unmarked	Unmarked
NM_000878	IL2RB	chr22	37521879	37545962	-	Unmarked	Unmarked	H3K27me3-only	H3K27me3-only	H3K27me3-only	Unmarked	Unmarked	Unmarked	H3K27me3-only	H3K27me3-only	H3K4me3-only	Unmarked	Unmarked	Unmarked	Unmarked	Unmarked	H3K4me3-only	Unmarked	Unmarked	Unmarked
NM_000879	IL5	chr5	131877135	131879214	-	Unmarked	Unmarked	Unmarked	Unmarked	Unmarked	Unmarked	Unmarked	Unmarked	Unmarked	Unmarked	Unmarked	Unmarked	Unmarked	Unmarked	Unmarked	Unmarked	Unmarked	Unmarked	Unmarked	Unmarked
NM_000882	IL12A	chr3	159706622	159713806	+	H3K4me3-only	Bivalent	H3K4me3-only	H3K4me3-only	H3K4me3-only	H3K4me3-only	H3K4me3-only	H3K4me3-only	H3K4me3-only	H3K4me3-only	H3K4me3-only	H3K4me3-only	H3K4me3-only	H3K4me3-only	H3K4me3-only	H3K4me3-only	H3K4me3-only	H3K4me3-only	H3K4me3-only	H3K4me3-only
NM_000883	IMPDH1	chr7	128032330	128050036	-	Bivalent	Bivalent	Bivalent	H3K4me3-only	H3K4me3-only	H3K4me3-only	Bivalent	Bivalent	H3K4me3-only	H3K4me3-only	H3K4me3-only	H3K4me3-only	H3K4me3-only	H3K4me3-only	H3K4me3-only	H3K4me3-only	H3K4me3-only	H3K4me3-only	H3K4me3-only	H3K4me3-only
NM_000884	IMPDH2	chr3	49061761	49066875	-	H3K4me3-only	H3K4me3-only	H3K4me3-only	H3K4me3-only	H3K4me3-only	H3K4me3-only	H3K4me3-only	H3K4me3-only	H3K4me3-only	H3K4me3-only	H3K4me3-only	H3K4me3-only	H3K4me3-only	H3K4me3-only	H3K4me3-only	H3K4me3-only	H3K4me3-only	H3K4me3-only	H3K4me3-only	H3K4me3-only
NM_000885	ITGA4	chr2	182321618	182402468	+	Bivalent	Bivalent	Bivalent	H3K4me3-only	H3K4me3-only	H3K4me3-only	Bivalent	Bivalent	H3K4me3-only	H3K4me3-only	H3K4me3-only	H3K4me3-only	Bivalent	H3K4me3-only	Bivalent	H3K4me3-only	H3K4me3-only	H3K4me3-only	Unmarked	H3K4me3-only
NM_000887	ITGAX	chr16	31366508	31394318	+	Unmarked	Unmarked	Unmarked	Unmarked	Unmarked	Unmarked	Unmarked	Unmarked	Unmarked	Unmarked	H3K4me3-only	Unmarked	Unmarked	Unmarked	Unmarked	Unmarked	Unmarked	Unmarked	Unmarked	Unmarked
NM_000888	ITGB6	chr2	160958232	161056590	-	Unmarked	Unmarked	Unmarked	Unmarked	Unmarked	Unmarked	H3K4me3-only	H3K4me3-only	H3K4me3-only	Unmarked	Unmarked	H3K4me3-only	H3K4me3-only	Unmarked	Unmarked	H3K4me3-only	H3K4me3-only	Unmarked	Unmarked	Unmarked
NM_000889	ITGB7	chr12	53585106	53601000	-	Unmarked	Unmarked	H3K27me3-only	Unmarked	H3K4me3-only	H3K4me3-only	Unmarked	Unmarked	Unmarked	Unmarked	H3K4me3-only	Unmarked	Unmarked	Unmarked	Unmarked	Unmarked	H3K4me3-only	Unmarked	Unmarked	Unmarked
NM_000890	KCNJ5	chr11	128761312	128787951	+	Bivalent	Bivalent	Bivalent	Bivalent	Bivalent	Bivalent	Bivalent	Bivalent	Bivalent	H3K4me3-only	H3K27me3-only	H3K4me3-only	H3K4me3-only	Bivalent	H3K27me3-only	H3K4me3-only	H3K4me3-only	H3K4me3-only	H3K4me3-only	H3K4me3-only
NM_000891	KCNJ2	chr17	68165675	68176183	+	Bivalent	Bivalent	H3K4me3-only	H3K4me3-only	H3K4me3-only	Bivalent	Bivalent	Bivalent	H3K4me3-only	H3K4me3-only	Bivalent	H3K4me3-only	H3K4me3-only	H3K4me3-only	H3K4me3-only	H3K4me3-only	H3K4me3-only	H3K4me3-only	H3K4me3-only	H3K4me3-only
NM_000892	KLKB1	chr4	187148671	187179625	+	Unmarked	Unmarked	Unmarked	Unmarked	Unmarked	Unmarked	Unmarked	Unmarked	Unmarked	Unmarked	Unmarked	Unmarked	Unmarked	Unmarked	Unmarked	Unmarked	Unmarked	Unmarked	Unmarked	Unmarked
NM_000893	KNG1	chr3	186435097	186462199	+	Unmarked	Unmarked	Unmarked	Unmarked	Unmarked	Unmarked	Unmarked	Unmarked	Unmarked	Unmarked	Unmarked	Unmarked	Unmarked	Unmarked	Unmarked	Unmarked	Unmarked	Unmarked	Unmarked	Unmarked
NM_000894	LHB	chr19	49519236	49520347	-	H3K27me3-only	H3K27me3-only	H3K27me3-only	H3K4me3-only	H3K4me3-only	Unmarked	Unmarked	H3K27me3-only	Unmarked	Unmarked	Unmarked	Unmarked	Unmarked	Unmarked	Unmarked	Unmarked	Unmarked	Unmarked	Unmarked	Unmarked
NM_000895	LTA4H	chr12	96394530	96429439	-	H3K4me3-only	H3K4me3-only	H3K4me3-only	H3K4me3-only	H3K4me3-only	H3K4me3-only	H3K4me3-only	H3K4me3-only	H3K4me3-only	H3K4me3-only	H3K4me3-only	H3K4me3-only	H3K4me3-only	H3K4me3-only	H3K4me3-only	H3K4me3-only	H3K4me3-only	H3K4me3-only	H3K4me3-only	H3K4me3-only
NM_000896	CYP4F3	chr19	15751706	15771570	+	Unmarked	Unmarked	H3K27me3-only	Unmarked	Unmarked	Unmarked	Unmarked	Unmarked	Unmarked	H3K27me3-only	Unmarked	Unmarked	Unmarked	Unmarked	Unmarked	Unmarked	Unmarked	Unmarked	Unmarked	Unmarked
NM_000898	MAOB	chrX	43625856	43741721	-	Bivalent	Bivalent	H3K4me3-only	Bivalent	Bivalent	Bivalent	H3K4me3-only	H3K4me3-only	H3K4me3-only	H3K4me3-only	H3K27me3-only	Bivalent	Bivalent	H3K4me3-only	Unmarked	H3K4me3-only	H3K4me3-only	H3K4me3-only	H3K4me3-only	H3K4me3-only
NM_000899	KITLG	chr12	88886569	88974250	-	H3K4me3-only	Bivalent	Bivalent	H3K4me3-only	H3K4me3-only	Bivalent	H3K4me3-only	H3K4me3-only	H3K4me3-only	H3K4me3-only	H3K27me3-only	H3K4me3-only	H3K4me3-only	H3K4me3-only	H3K4me3-only	H3K4me3-only	H3K4me3-only	H3K4me3-only	H3K4me3-only	H3K4me3-only
NM_000900	MGP	chr12	15034114	15038853	-	Unmarked	Unmarked	Unmarked	Unmarked	Unmarked	Unmarked	H3K4me3-only	H3K4me3-only	Unmarked	Unmarked	Unmarked	Unmarked	H3K4me3-only	H3K4me3-only	H3K4me3-only	Unmarked	Unmarked	H3K4me3-only	Unmarked	Unmarked
NM_000902	MME	chr3	154797435	154901518	+	H3K4me3-only	Bivalent	Bivalent	H3K4me3-only	H3K4me3-only	Bivalent	H3K4me3-only	H3K4me3-only	Bivalent	H3K4me3-only	Bivalent	H3K4me3-only	H3K4me3-only	H3K4me3-only	H3K4me3-only	H3K4me3-only	H3K4me3-only	H3K4me3-only	H3K4me3-only	H3K4me3-only
NM_000903	NQO1	chr16	69743303	69760533	-	H3K4me3-only	H3K4me3-only	H3K4me3-only	H3K4me3-only	H3K4me3-only	H3K4me3-only	H3K4me3-only	H3K4me3-only	H3K4me3-only	H3K4me3-only	H3K4me3-only	H3K4me3-only	H3K4me3-only	H3K4me3-only	H3K4me3-only	H3K4me3-only	H3K4me3-only	H3K4me3-only	H3K4me3-only	H3K4me3-only
NM_000904	NQO2	chr6	3000066	3019994	+	H3K4me3-only	H3K4me3-only	H3K4me3-only	H3K4me3-only	H3K4me3-only	H3K4me3-only	H3K4me3-only	H3K4me3-only	H3K4me3-only	H3K4me3-only	H3K4me3-only	H3K4me3-only	H3K4me3-only	H3K4me3-only	H3K4me3-only	H3K4me3-only	H3K4me3-only	H3K4me3-only	H3K4me3-only	H3K4me3-only
NM_000905	NPY	chr7	24323806	24331484	+	Bivalent	Bivalent	Bivalent	Bivalent	H3K27me3-only	Bivalent	Bivalent	Bivalent	Bivalent	Bivalent	Bivalent	H3K27me3-only	Bivalent	H3K27me3-only	H3K27me3-only	H3K4me3-only	Unmarked	Unmarked	Unmarked	H3K4me3-only
NM_000906	NPR1	chr1	153651163	153666468	+	Bivalent	Bivalent	Bivalent	Bivalent	Bivalent	Bivalent	Bivalent	Bivalent	Bivalent	Bivalent	Bivalent	Bivalent	Bivalent	Bivalent	H3K4me3-only	H3K4me3-only	H3K4me3-only	H3K4me3-only	H3K4me3-only	H3K4me3-only
NM_000908	NPR3	chr5	32711437	32791830	+	Bivalent	Bivalent	Bivalent	Bivalent	H3K4me3-only	H3K4me3-only	Bivalent	Bivalent	Bivalent	H3K27me3-only	Bivalent	Bivalent	Bivalent	H3K4me3-only	H3K27me3-only	H3K4me3-only	H3K4me3-only	H3K4me3-only	Unmarked	H3K4me3-only
NM_000909	NPY1R	chr4	164245116	164253947	-	Bivalent	Bivalent	Bivalent	Bivalent	H3K4me3-only	Bivalent	Bivalent	Bivalent	Bivalent	Bivalent	H3K27me3-only	Bivalent	H3K4me3-only	Bivalent	Bivalent	H3K4me3-only	H3K4me3-only	H3K4me3-only	H3K4me3-only	H3K4me3-only
NM_000910	NPY2R	chr4	156129780	156138228	+	Bivalent	Bivalent	Bivalent	Bivalent	H3K4me3-only	Bivalent	Bivalent	Bivalent	H3K27me3-only	H3K27me3-only	H3K27me3-only	H3K27me3-only	Bivalent	H3K27me3-only	Bivalent	Unmarked	Unmarked	Unmarked	Unmarked	H3K4me3-only
NM_000911	OPRD1	chr1	29138653	29190208	+	Bivalent	Bivalent	Bivalent	Bivalent	Bivalent	Bivalent	H3K27me3-only	H3K27me3-only	H3K27me3-only	Bivalent	H3K27me3-only	H3K27me3-only	H3K27me3-only	H3K27me3-only	H3K27me3-only	H3K4me3-only	Unmarked	Unmarked	Unmarked	Unmarked
NM_000912	OPRK1	chr8	54138275	54164194	-	Bivalent	Bivalent	Bivalent	H3K27me3-only	Bivalent	Bivalent	H3K27me3-only	H3K27me3-only	Bivalent	Bivalent	H3K27me3-only	Bivalent	Bivalent	H3K27me3-only	H3K27me3-only	Unmarked	H3K4me3-only	H3K4me3-only	Unmarked	Unmarked
NM_000915	OXT	chr20	3052265	3053163	+	Bivalent	Bivalent	H3K27me3-only	Bivalent	Bivalent	H3K4me3-only	Bivalent	Bivalent	Bivalent	H3K4me3-only	H3K4me3-only	H3K27me3-only	H3K4me3-only	H3K27me3-only	Unmarked	H3K4me3-only	H3K4me3-only	Unmarked	H3K4me3-only	H3K4me3-only
NM_000916	OXTR	chr3	8792094	8811300	-	H3K27me3-only	Bivalent	Bivalent	Bivalent	Bivalent	Bivalent	Bivalent	Bivalent	Bivalent	Bivalent	H3K27me3-only	Bivalent	H3K4me3-only	H3K4me3-only	H3K27me3-only	H3K4me3-only	Unmarked	Unmarked	H3K4me3-only	Unmarked
NM_000918	P4HB	chr17	79801033	79818544	-	H3K4me3-only	H3K4me3-only	H3K4me3-only	H3K4me3-only	H3K4me3-only	H3K4me3-only	H3K4me3-only	H3K4me3-only	H3K4me3-only	H3K4me3-only	H3K4me3-only	H3K4me3-only	H3K4me3-only	H3K4me3-only	H3K4me3-only	H3K4me3-only	H3K4me3-only	H3K4me3-only	H3K4me3-only	H3K4me3-only
NM_000920	PC	chr11	66615996	66725847	-	H3K4me3-only	H3K4me3-only	H3K4me3-only	H3K4me3-only	H3K4me3-only	Bivalent	H3K4me3-only	H3K4me3-only	H3K4me3-only	H3K4me3-only	H3K4me3-only	H3K4me3-only	H3K4me3-only	H3K4me3-only	H3K4me3-only	H3K4me3-only	H3K4me3-only	H3K4me3-only	H3K4me3-only	H3K4me3-only
NM_000921	PDE3A	chr12	20522178	20837041	+	H3K4me3-only	Bivalent	Bivalent	H3K4me3-only	Bivalent	Bivalent	H3K4me3-only	H3K4me3-only	Bivalent	H3K4me3-only	Bivalent	Bivalent	H3K4me3-only	H3K4me3-only	H3K4me3-only	H3K4me3-only	H3K4me3-only	H3K4me3-only	H3K4me3-only	H3K4me3-only
NM_000922	PDE3B	chr11	14665268	14893604	+	Bivalent	Bivalent	Bivalent	H3K4me3-only	H3K4me3-only	Bivalent	H3K4me3-only	H3K4me3-only	Bivalent	H3K4me3-only	H3K4me3-only	Bivalent	H3K4me3-only	H3K4me3-only	H3K4me3-only	H3K4me3-only	H3K4me3-only	H3K4me3-only	H3K4me3-only	H3K4me3-only
NM_000923	PDE4C	chr19	18318770	18359010	-	Unmarked	Unmarked	H3K27me3-only	H3K27me3-only	H3K27me3-only	Unmarked	Unmarked	Unmarked	Unmarked	Unmarked	Unmarked	Unmarked	Unmarked	Unmarked	Unmarked	Unmarked	Unmarked	Unmarked	Unmarked	Unmarked
NM_000924	PDE1B	chr12	54943176	54973023	+	Bivalent	Bivalent	Bivalent	Bivalent	Bivalent	H3K4me3-only	Bivalent	Bivalent	Bivalent	Bivalent	H3K4me3-only	H3K27me3-only	H3K4me3-only	H3K27me3-only	H3K27me3-only	H3K4me3-only	H3K4me3-only	Unmarked	H3K4me3-only	H3K4me3-only
NM_000925	PDHB	chr3	58413356	58419579	-	H3K4me3-only	H3K4me3-only	H3K4me3-only	H3K4me3-only	H3K4me3-only	H3K4me3-only	H3K4me3-only	H3K4me3-only	H3K4me3-only	H3K4me3-only	H3K4me3-only	H3K4me3-only	H3K4me3-only	H3K4me3-only	H3K4me3-only	H3K4me3-only	H3K4me3-only	H3K4me3-only	H3K4me3-only	H3K4me3-only
NM_000926	PGR	chr11	100900354	101000544	-	Bivalent	Bivalent	Bivalent	H3K27me3-only	H3K27me3-only	H3K27me3-only	H3K27me3-only	H3K27me3-only	H3K27me3-only	H3K27me3-only	H3K27me3-only	H3K27me3-only	H3K4me3-only	Bivalent	H3K27me3-only	H3K4me3-only	H3K4me3-only	H3K4me3-only	Unmarked	Unmarked
NM_000927	ABCB1	chr7	87133178	87342639	-	Unmarked	Unmarked	Unmarked	Unmarked	Unmarked	Unmarked	Unmarked	Unmarked	Unmarked	Unmarked	Unmarked	Unmarked	Unmarked	Unmarked	H3K4me3-only	Unmarked	Unmarked	Unmarked	Unmarked	Unmarked
NM_000928	PLA2G1B	chr12	120759913	120765592	-	Unmarked	Unmarked	Unmarked	H3K27me3-only	Unmarked	Unmarked	Unmarked	Unmarked	Unmarked	Unmarked	Unmarked	Unmarked	Unmarked	Unmarked	Unmarked	H3K4me3-only	Unmarked	Unmarked	Unmarked	H3K4me3-only
NM_000929	PLA2G5	chr1	20396700	20418394	+	Unmarked	Unmarked	Unmarked	Unmarked	Unmarked	Unmarked	Unmarked	Unmarked	Unmarked	Unmarked	Unmarked	Unmarked	Unmarked	H3K4me3-only	Unmarked	Unmarked	H3K4me3-only	H3K4me3-only	Unmarked	Unmarked
NM_000933	PLCB4	chr20	9288446	9461462	+	Unmarked	Unmarked	Unmarked	Unmarked	Unmarked	Unmarked	Unmarked	Unmarked	Unmarked	Unmarked	Unmarked	Unmarked	Unmarked	Unmarked	Unmarked	Unmarked	Unmarked	Unmarked	Unmarked	Unmarked
NM_000934	SERPINF2	chr17	1646129	1658559	+	Unmarked	Unmarked	Unmarked	H3K27me3-only	H3K27me3-only	Unmarked	Unmarked	Unmarked	Unmarked	Unmarked	Unmarked	Unmarked	Unmarked	Unmarked	Unmarked	Unmarked	Unmarked	Unmarked	Unmarked	Unmarked
NM_000936	PNLIP	chr10	118305427	118327367	+	Unmarked	Unmarked	Unmarked	Unmarked	Unmarked	Unmarked	Unmarked	Unmarked	Unmarked	Unmarked	Unmarked	Unmarked	Unmarked	Unmarked	Unmarked	Unmarked	Unmarked	Unmarked	Unmarked	H3K4me3-only
NM_000937	POLR2A	chr17	7387697	7417935	+	H3K4me3-only	H3K4me3-only	H3K4me3-only	H3K4me3-only	H3K4me3-only	H3K4me3-only	H3K4me3-only	H3K4me3-only	H3K4me3-only	H3K4me3-only	H3K4me3-only	H3K4me3-only	H3K4me3-only	H3K4me3-only	H3K4me3-only	H3K4me3-only	H3K4me3-only	H3K4me3-only	Unmarked	H3K4me3-only
NM_000938	POLR2B	chr4	57845108	57897334	+	H3K4me3-only	H3K4me3-only	H3K4me3-only	H3K4me3-only	H3K4me3-only	H3K4me3-only	H3K4me3-only	H3K4me3-only	H3K4me3-only	H3K4me3-only	H3K4me3-only	H3K4me3-only	H3K4me3-only	H3K4me3-only	H3K4me3-only	H3K4me3-only	H3K4me3-only	H3K4me3-only	H3K4me3-only	H3K4me3-only
NM_000940	PON3	chr7	94989183	95025687	-	H3K4me3-only	H3K4me3-only	H3K4me3-only	H3K4me3-only	H3K4me3-only	H3K4me3-only	H3K4me3-only	H3K4me3-only	H3K4me3-only	H3K4me3-only	Bivalent	H3K4me3-only	H3K4me3-only	H3K4me3-only	H3K4me3-only	H3K4me3-only	H3K4me3-only	H3K4me3-only	H3K4me3-only	H3K4me3-only
NM_000941	POR	chr7	75544419	75616173	+	H3K4me3-only	H3K4me3-only	H3K4me3-only	H3K4me3-only	H3K4me3-only	H3K4me3-only	H3K4me3-only	H3K4me3-only	H3K4me3-only	H3K4me3-only	H3K4me3-only	H3K4me3-only	H3K4me3-only	H3K4me3-only	H3K4me3-only	H3K4me3-only	H3K4me3-only	H3K4me3-only	H3K4me3-only	H3K4me3-only
NM_000942	PPIB	chr15	64448013	64455354	-	H3K4me3-only	H3K4me3-only	H3K4me3-only	H3K4me3-only	H3K4me3-only	H3K4me3-only	H3K4me3-only	H3K4me3-only	H3K4me3-only	H3K4me3-only	H3K4me3-only	H3K4me3-only	H3K4me3-only	H3K4me3-only	H3K4me3-only	H3K4me3-only	H3K4me3-only	H3K4me3-only	H3K4me3-only	H3K4me3-only
NM_000943	PPIC	chr5	122359077	122372425	-	Bivalent	Bivalent	Bivalent	H3K4me3-only	H3K4me3-only	Bivalent	Bivalent	H3K4me3-only	H3K4me3-only	H3K4me3-only	Bivalent	H3K4me3-only	H3K4me3-only	H3K4me3-only	H3K4me3-only	H3K4me3-only	H3K4me3-only	H3K4me3-only	H3K4me3-only	H3K4me3-only
NM_000944	PPP3CA	chr4	101944586	102268628	-	H3K4me3-only	H3K4me3-only	Bivalent	H3K4me3-only	H3K4me3-only	H3K4me3-only	H3K4me3-only	H3K4me3-only	H3K4me3-only	H3K4me3-only	H3K4me3-only	H3K4me3-only	H3K4me3-only	H3K4me3-only	H3K4me3-only	H3K4me3-only	H3K4me3-only	H3K4me3-only	H3K4me3-only	H3K4me3-only
NM_000945	PPP3R1	chr2	68405988	68479651	-	H3K4me3-only	H3K4me3-only	H3K4me3-only	H3K4me3-only	H3K4me3-only	H3K4me3-only	H3K4me3-only	H3K4me3-only	H3K4me3-only	H3K4me3-only	H3K4me3-only	H3K4me3-only	H3K4me3-only	H3K4me3-only	H3K4me3-only	H3K4me3-only	H3K4me3-only	H3K4me3-only	H3K4me3-only	H3K4me3-only
NM_000946	PRIM1	chr12	57125363	57146146	-	H3K4me3-only	H3K4me3-only	H3K4me3-only	H3K4me3-only	H3K4me3-only	H3K4me3-only	H3K4me3-only	H3K4me3-only	H3K4me3-only	H3K4me3-only	H3K4me3-only	H3K4me3-only	H3K4me3-only	H3K4me3-only	H3K4me3-only	H3K4me3-only	H3K4me3-only	H3K4me3-only	H3K4me3-only	H3K4me3-only
NM_000947	PRIM2	chr6	57182421	57513376	+	H3K4me3-only	H3K4me3-only	H3K4me3-only	H3K4me3-only	H3K4me3-only	H3K4me3-only	H3K4me3-only	H3K4me3-only	H3K4me3-only	H3K4me3-only	H3K4me3-only	H3K4me3-only	H3K4me3-only	H3K4me3-only	H3K4me3-only	H3K4me3-only	H3K4me3-only	H3K4me3-only	H3K4me3-only	H3K4me3-only
NM_000948	PRL	chr6	22287472	22297730	-	Unmarked	Unmarked	Unmarked	Unmarked	Unmarked	Unmarked	Unmarked	Unmarked	Unmarked	Unmarked	Unmarked	Unmarked	Unmarked	Unmarked	Unmarked	Unmarked	Unmarked	Unmarked	Unmarked	Unmarked
NM_000949	PRLR	chr5	35055801	35230823	-	H3K4me3-only	H3K4me3-only	Bivalent	Bivalent	Bivalent	Bivalent	H3K4me3-only	H3K4me3-only	Bivalent	Bivalent	Bivalent	H3K27me3-only	H3K4me3-only	H3K27me3-only	H3K27me3-only	H3K4me3-only	Unmarked	Unmarked	Unmarked	H3K4me3-only
NM_000950	PRRG1	chrX	37208527	37316548	+	H3K4me3-only	H3K4me3-only	Bivalent	H3K4me3-only	H3K4me3-only	Bivalent	H3K4me3-only	H3K4me3-only	H3K4me3-only	H3K4me3-only	H3K4me3-only	H3K4me3-only	Bivalent	H3K4me3-only	H3K4me3-only	H3K4me3-only	H3K4me3-only	H3K4me3-only	H3K4me3-only	H3K4me3-only
NM_000951	PRRG2	chr19	50084586	50094265	+	H3K4me3-only	H3K4me3-only	H3K4me3-only	H3K4me3-only	H3K4me3-only	H3K4me3-only	H3K4me3-only	H3K4me3-only	H3K4me3-only	H3K4me3-only	Unmarked	H3K4me3-only	H3K4me3-only	Unmarked	H3K4me3-only	H3K4me3-only	H3K4me3-only	Unmarked	H3K4me3-only	H3K4me3-only
NM_000952	PTAFR	chr1	28473676	28503455	-	Unmarked	Unmarked	H3K4me3-only	H3K27me3-only	H3K27me3-only	H3K4me3-only	Unmarked	Unmarked	Unmarked	Unmarked	H3K4me3-only	Unmarked	H3K4me3-only	Unmarked	Unmarked	Unmarked	Unmarked	Unmarked	Unmarked	Unmarked
NM_000953	PTGDR	chr14	52734430	52743442	+	Bivalent	Bivalent	Bivalent	Bivalent	H3K4me3-only	Bivalent	Bivalent	Bivalent	Bivalent	Bivalent	Bivalent	H3K27me3-only	Bivalent	Bivalent	H3K27me3-only	Unmarked	H3K4me3-only	H3K4me3-only	H3K4me3-only	H3K4me3-only
NM_000954	PTGDS	chr9	139871955	139876194	+	H3K4me3-only	Bivalent	Bivalent	Bivalent	Bivalent	H3K27me3-only	H3K27me3-only	Unmarked	H3K27me3-only	Bivalent	Unmarked	Unmarked	H3K4me3-only	H3K27me3-only	Unmarked	Unmarked	H3K4me3-only	H3K4me3-only	Unmarked	H3K4me3-only
NM_000955	PTGER1	chr19	14583277	14586174	-	Unmarked	H3K4me3-only	H3K27me3-only	Bivalent	Bivalent	Bivalent	Bivalent	H3K27me3-only	Unmarked	Bivalent	H3K27me3-only	Unmarked	H3K27me3-only	H3K4me3-only	Unmarked	Unmarked	H3K4me3-only	Unmarked	Unmarked	Unmarked
NM_000956	PTGER2	chr14	52781015	52795322	+	Bivalent	Bivalent	Bivalent	H3K4me3-only	H3K4me3-only	H3K4me3-only	Bivalent	Bivalent	Bivalent	Bivalent	H3K4me3-only	H3K4me3-only	H3K4me3-only	H3K4me3-only	Bivalent	Unmarked	H3K4me3-only	H3K4me3-only	H3K4me3-only	H3K4me3-only
NM_000958	PTGER4	chr5	40680031	40693837	+	Bivalent	Bivalent	Bivalent	H3K4me3-only	H3K4me3-only	H3K4me3-only	H3K4me3-only	Bivalent	H3K4me3-only	Bivalent	H3K4me3-only	H3K4me3-only	H3K4me3-only	H3K4me3-only	H3K4me3-only	H3K4me3-only	H3K4me3-only	H3K4me3-only	H3K4me3-only	H3K4me3-only
NM_000959	PTGFR	chr1	78956727	79006386	+	Bivalent	Bivalent	Bivalent	H3K4me3-only	H3K4me3-only	Bivalent	Bivalent	Bivalent	Bivalent	Bivalent	H3K27me3-only	Bivalent	H3K4me3-only	H3K4me3-only	Bivalent	H3K4me3-only	H3K4me3-only	Unmarked	H3K4me3-only	H3K4me3-only
NM_000960	PTGIR	chr19	47123724	47128354	-	Unmarked	Unmarked	Unmarked	H3K4me3-only	H3K4me3-only	Unmarked	Bivalent	Unmarked	Unmarked	Unmarked	Unmarked	Unmarked	Unmarked	H3K4me3-only	Unmarked	Unmarked	Unmarked	Unmarked	Unmarked	Unmarked
NM_000961	PTGIS	chr20	48120410	48184707	-	H3K4me3-only	H3K4me3-only	Bivalent	H3K4me3-only	Bivalent	H3K27me3-only	H3K4me3-only	H3K4me3-only	H3K27me3-only	Bivalent	H3K27me3-only	H3K27me3-only	H3K4me3-only	Bivalent	H3K4me3-only	Unmarked	H3K4me3-only	H3K4me3-only	Unmarked	H3K4me3-only
NM_000963	PTGS2	chr1	186640943	186649559	-	H3K4me3-only	Bivalent	Bivalent	H3K4me3-only	H3K4me3-only	H3K4me3-only	Bivalent	Bivalent	H3K4me3-only	H3K4me3-only	Bivalent	H3K4me3-only	H3K4me3-only	H3K4me3-only	H3K4me3-only	H3K4me3-only	H3K4me3-only	H3K4me3-only	H3K4me3-only	H3K4me3-only
NM_000964	RARA	chr17	38465422	38513895	+	H3K4me3-only	H3K4me3-only	H3K4me3-only	H3K4me3-only	H3K4me3-only	H3K4me3-only	H3K4me3-only	H3K4me3-only	H3K4me3-only	H3K4me3-only	H3K4me3-only	H3K4me3-only	H3K4me3-only	Unmarked	Unmarked	H3K4me3-only	H3K4me3-only	H3K4me3-only	H3K4me3-only	H3K4me3-only
NM_000965	RARB	chr3	25469833	25639422	+	H3K4me3-only	H3K4me3-only	Bivalent	H3K4me3-only	H3K4me3-only	Bivalent	H3K4me3-only	H3K4me3-only	Bivalent	H3K4me3-only	H3K27me3-only	Bivalent	H3K4me3-only	H3K4me3-only	H3K4me3-only	Unmarked	H3K4me3-only	H3K4me3-only	H3K4me3-only	H3K4me3-only
NM_000968	RPL4	chr15	66791652	66797193	-	H3K4me3-only	H3K4me3-only	H3K4me3-only	H3K4me3-only	H3K4me3-only	H3K4me3-only	H3K4me3-only	H3K4me3-only	H3K4me3-only	H3K4me3-only	H3K4me3-only	H3K4me3-only	H3K4me3-only	H3K4me3-only	H3K4me3-only	H3K4me3-only	H3K4me3-only	H3K4me3-only	H3K4me3-only	H3K4me3-only
NM_000969	RPL5	chr1	93297593	93307481	+	H3K4me3-only	H3K4me3-only	H3K4me3-only	H3K4me3-only	H3K4me3-only	H3K4me3-only	H3K4me3-only	H3K4me3-only	H3K4me3-only	H3K4me3-only	H3K4me3-only	H3K4me3-only	H3K4me3-only	H3K4me3-only	H3K4me3-only	H3K4me3-only	H3K4me3-only	H3K4me3-only	H3K4me3-only	H3K4me3-only
NM_000971	RPL7	chr8	74202873	74205869	-	H3K4me3-only	H3K4me3-only	Bivalent	H3K4me3-only	H3K4me3-only	H3K4me3-only	H3K4me3-only	H3K4me3-only	H3K4me3-only	H3K4me3-only	H3K4me3-only	H3K4me3-only	H3K4me3-only	H3K4me3-only	H3K4me3-only	H3K4me3-only	H3K4me3-only	H3K4me3-only	H3K4me3-only	H3K4me3-only
NM_000972	RPL7A	chr9	136215068	136218280	+	H3K4me3-only	H3K4me3-only	H3K4me3-only	H3K4me3-only	H3K4me3-only	H3K4me3-only	H3K4me3-only	H3K4me3-only	H3K4me3-only	H3K4me3-only	H3K4me3-only	H3K4me3-only	H3K4me3-only	H3K4me3-only	H3K4me3-only	H3K4me3-only	H3K4me3-only	H3K4me3-only	H3K4me3-only	H3K4me3-only
NM_000973	RPL8	chr8	146015153	146017805	-	H3K4me3-only	H3K4me3-only	H3K4me3-only	H3K4me3-only	H3K4me3-only	H3K4me3-only	H3K4me3-only	H3K4me3-only	H3K4me3-only	H3K4me3-only	H3K4me3-only	H3K4me3-only	H3K4me3-only	H3K4me3-only	H3K4me3-only	H3K4me3-only	H3K4me3-only	H3K4me3-only	H3K4me3-only	H3K4me3-only
NM_000975	RPL11	chr1	24018268	24022915	+	H3K4me3-only	H3K4me3-only	H3K4me3-only	H3K4me3-only	H3K4me3-only	H3K4me3-only	H3K4me3-only	H3K4me3-only	H3K4me3-only	H3K4me3-only	H3K4me3-only	H3K4me3-only	H3K4me3-only	H3K4me3-only	H3K4me3-only	H3K4me3-only	H3K4me3-only	H3K4me3-only	H3K4me3-only	H3K4me3-only
NM_000976	RPL12	chr9	130209952	130213711	-	H3K4me3-only	H3K4me3-only	H3K4me3-only	H3K4me3-only	H3K4me3-only	H3K4me3-only	H3K4me3-only	H3K4me3-only	H3K4me3-only	H3K4me3-only	H3K4me3-only	H3K4me3-only	H3K4me3-only	H3K4me3-only	H3K4me3-only	H3K4me3-only	H3K4me3-only	H3K4me3-only	H3K4me3-only	H3K4me3-only
NM_000978	RPL23	chr17	37006320	37010053	-	H3K4me3-only	H3K4me3-only	H3K4me3-only	H3K4me3-only	H3K4me3-only	H3K4me3-only	H3K4me3-only	H3K4me3-only	H3K4me3-only	H3K4me3-only	H3K4me3-only	H3K4me3-only	H3K4me3-only	H3K4me3-only	H3K4me3-only	H3K4me3-only	H3K4me3-only	H3K4me3-only	H3K4me3-only	H3K4me3-only
NM_000980	RPL18A	chr19	17970686	17974133	+	H3K4me3-only	H3K4me3-only	H3K4me3-only	H3K4me3-only	H3K4me3-only	H3K4me3-only	H3K4me3-only	H3K4me3-only	H3K4me3-only	H3K4me3-only	H3K4me3-only	H3K4me3-only	H3K4me3-only	H3K4me3-only	H3K4me3-only	H3K4me3-only	H3K4me3-only	H3K4me3-only	H3K4me3-only	H3K4me3-only
NM_000981	RPL19	chr17	37356535	37360980	+	H3K4me3-only	H3K4me3-only	H3K4me3-only	H3K4me3-only	H3K4me3-only	H3K4me3-only	H3K4me3-only	H3K4me3-only	H3K4me3-only	H3K4me3-only	H3K4me3-only	H3K4me3-only	H3K4me3-only	H3K4me3-only	H3K4me3-only	H3K4me3-only	H3K4me3-only	H3K4me3-only	H3K4me3-only	H3K4me3-only
NM_000982	RPL21	chr13	27825691	27830702	+	H3K4me3-only	H3K4me3-only	H3K4me3-only	H3K4me3-only	H3K4me3-only	H3K4me3-only	H3K4me3-only	H3K4me3-only	H3K4me3-only	H3K4me3-only	H3K4me3-only	H3K4me3-only	H3K4me3-only	H3K4me3-only	H3K4me3-only	H3K4me3-only	H3K4me3-only	H3K4me3-only	H3K4me3-only	H3K4me3-only
NM_000983	RPL22	chr1	6245079	6259679	-	H3K4me3-only	H3K4me3-only	H3K4me3-only	H3K4me3-only	H3K4me3-only	H3K4me3-only	H3K4me3-only	H3K4me3-only	H3K4me3-only	H3K4me3-only	H3K4me3-only	H3K4me3-only	H3K4me3-only	H3K4me3-only	H3K4me3-only	H3K4me3-only	H3K4me3-only	H3K4me3-only	H3K4me3-only	H3K4me3-only
NM_000984	RPL23A	chr17	27046999	27051374	+	H3K4me3-only	H3K4me3-only	H3K4me3-only	H3K4me3-only	H3K4me3-only	H3K4me3-only	H3K4me3-only	H3K4me3-only	H3K4me3-only	H3K4me3-only	H3K4me3-only	H3K4me3-only	H3K4me3-only	H3K4me3-only	H3K4me3-only	H3K4me3-only	H3K4me3-only	H3K4me3-only	H3K4me3-only	H3K4me3-only
NM_000986	RPL24	chr3	101399933	101405563	-	H3K4me3-only	H3K4me3-only	H3K4me3-only	H3K4me3-only	H3K4me3-only	H3K4me3-only	H3K4me3-only	H3K4me3-only	H3K4me3-only	H3K4me3-only	H3K4me3-only	H3K4me3-only	H3K4me3-only	H3K4me3-only	H3K4me3-only	H3K4me3-only	H3K4me3-only	H3K4me3-only	H3K4me3-only	H3K4me3-only
NM_000987	RPL26	chr17	8280833	8286565	-	H3K4me3-only	H3K4me3-only	H3K4me3-only	H3K4me3-only	H3K4me3-only	H3K4me3-only	H3K4me3-only	H3K4me3-only	H3K4me3-only	H3K4me3-only	H3K4me3-only	H3K4me3-only	H3K4me3-only	H3K4me3-only	H3K4me3-only	H3K4me3-only	H3K4me3-only	H3K4me3-only	H3K4me3-only	H3K4me3-only
NM_000988	RPL27	chr17	41150445	41154971	+	H3K4me3-only	H3K4me3-only	H3K4me3-only	H3K4me3-only	H3K4me3-only	H3K4me3-only	H3K4me3-only	H3K4me3-only	H3K4me3-only	H3K4me3-only	H3K4me3-only	H3K4me3-only	H3K4me3-only	H3K4me3-only	H3K4me3-only	H3K4me3-only	H3K4me3-only	H3K4me3-only	H3K4me3-only	H3K4me3-only
NM_000989	RPL30	chr8	99053937	99057818	-	H3K4me3-only	H3K4me3-only	Bivalent	H3K4me3-only	H3K4me3-only	H3K4me3-only	H3K4me3-only	H3K4me3-only	H3K4me3-only	H3K4me3-only	H3K4me3-only	H3K4me3-only	H3K4me3-only	H3K4me3-only	H3K4me3-only	H3K4me3-only	H3K4me3-only	H3K4me3-only	H3K4me3-only	H3K4me3-only
NM_000990	RPL27A	chr11	8703994	8711419	+	H3K4me3-only	H3K4me3-only	H3K4me3-only	H3K4me3-only	H3K4me3-only	H3K4me3-only	H3K4me3-only	H3K4me3-only	H3K4me3-only	H3K4me3-only	H3K4me3-only	H3K4me3-only	H3K4me3-only	H3K4me3-only	H3K4me3-only	H3K4me3-only	H3K4me3-only	H3K4me3-only	H3K4me3-only	H3K4me3-only
NM_000992	RPL29	chr3	52027643	52029958	-	H3K4me3-only	H3K4me3-only	H3K4me3-only	H3K4me3-only	H3K4me3-only	H3K4me3-only	H3K4me3-only	H3K4me3-only	H3K4me3-only	H3K4me3-only	H3K4me3-only	H3K4me3-only	H3K4me3-only	H3K4me3-only	H3K4me3-only	H3K4me3-only	H3K4me3-only	H3K4me3-only	H3K4me3-only	H3K4me3-only
NM_000994	RPL32	chr3	12876443	12883081	-	H3K4me3-only	H3K4me3-only	H3K4me3-only	H3K4me3-only	H3K4me3-only	H3K4me3-only	H3K4me3-only	H3K4me3-only	H3K4me3-only	H3K4me3-only	H3K4me3-only	H3K4me3-only	H3K4me3-only	H3K4me3-only	H3K4me3-only	H3K4me3-only	H3K4me3-only	H3K4me3-only	H3K4me3-only	H3K4me3-only
NM_000995	RPL34	chr4	109541721	109551639	+	H3K4me3-only	H3K4me3-only	H3K4me3-only	H3K4me3-only	H3K4me3-only	H3K4me3-only	H3K4me3-only	H3K4me3-only	H3K4me3-only	H3K4me3-only	H3K4me3-only	H3K4me3-only	H3K4me3-only	H3K4me3-only	H3K4me3-only	H3K4me3-only	H3K4me3-only	H3K4me3-only	H3K4me3-only	H3K4me3-only
NM_000996	RPL35A	chr3	197677051	197682721	+	H3K4me3-only	H3K4me3-only	H3K4me3-only	H3K4me3-only	H3K4me3-only	H3K4me3-only	H3K4me3-only	H3K4me3-only	H3K4me3-only	H3K4me3-only	H3K4me3-only	H3K4me3-only	H3K4me3-only	H3K4me3-only	H3K4me3-only	H3K4me3-only	H3K4me3-only	H3K4me3-only	H3K4me3-only	H3K4me3-only
NM_000997	RPL37	chr5	40831429	40835387	-	H3K4me3-only	H3K4me3-only	H3K4me3-only	H3K4me3-only	H3K4me3-only	H3K4me3-only	H3K4me3-only	H3K4me3-only	H3K4me3-only	H3K4me3-only	H3K4me3-only	H3K4me3-only	H3K4me3-only	H3K4me3-only	H3K4me3-only	H3K4me3-only	H3K4me3-only	H3K4me3-only	H3K4me3-only	H3K4me3-only
NM_000998	RPL37A	chr2	217363519	217366188	+	H3K4me3-only	H3K4me3-only	H3K4me3-only	H3K4me3-only	H3K4me3-only	H3K4me3-only	H3K4me3-only	H3K4me3-only	H3K4me3-only	H3K4me3-only	H3K4me3-only	H3K4me3-only	H3K4me3-only	H3K4me3-only	H3K4me3-only	H3K4me3-only	H3K4me3-only	H3K4me3-only	H3K4me3-only	H3K4me3-only
NM_000999	RPL38	chr17	72199794	72206019	+	H3K4me3-only	H3K4me3-only	H3K4me3-only	Bivalent	H3K4me3-only	H3K4me3-only	H3K4me3-only	H3K4me3-only	Bivalent	H3K4me3-only	H3K4me3-only	H3K4me3-only	H3K4me3-only	H3K4me3-only	H3K4me3-only	H3K4me3-only	H3K4me3-only	H3K4me3-only	H3K4me3-only	H3K4me3-only
NM_001000	RPL39	chrX	118920466	118925622	-	H3K4me3-only	H3K4me3-only	H3K4me3-only	H3K4me3-only	H3K4me3-only	H3K4me3-only	H3K4me3-only	H3K4me3-only	H3K4me3-only	H3K4me3-only	H3K4me3-only	H3K4me3-only	H3K4me3-only	H3K4me3-only	H3K4me3-only	H3K4me3-only	H3K4me3-only	H3K4me3-only	H3K4me3-only	H3K4me3-only
NM_001001	RPL36AL	chr14	50085405	50087403	-	H3K4me3-only	H3K4me3-only	H3K4me3-only	H3K4me3-only	H3K4me3-only	H3K4me3-only	H3K4me3-only	H3K4me3-only	H3K4me3-only	H3K4me3-only	H3K4me3-only	H3K4me3-only	H3K4me3-only	H3K4me3-only	H3K4me3-only	H3K4me3-only	H3K4me3-only	H3K4me3-only	H3K4me3-only	H3K4me3-only
NM_001001290	SLC2A9	chr4	9827847	10041872	-	Unmarked	Unmarked	Unmarked	H3K27me3-only	H3K27me3-only	Unmarked	Unmarked	Unmarked	Unmarked	Unmarked	Unmarked	Unmarked	Unmarked	Unmarked	Unmarked	Unmarked	Unmarked	Unmarked	Unmarked	Unmarked
NM_001001317	PRSS58	chr7	141951957	141957878	-	Unmarked	Unmarked	Unmarked	Unmarked	Unmarked	Unmarked	Unmarked	Unmarked	Unmarked	Unmarked	Unmarked	Unmarked	Unmarked	Unmarked	Unmarked	Unmarked	Unmarked	Unmarked	Unmarked	Unmarked
NM_001001325	SPINK14	chr5	147549295	147554961	+	Unmarked	Unmarked	Unmarked	Unmarked	Unmarked	Unmarked	Unmarked	Unmarked	Unmarked	Unmarked	Unmarked	Unmarked	Unmarked	Unmarked	Unmarked	Unmarked	Unmarked	Unmarked	Unmarked	Unmarked
NM_001001329	PRKCSH	chr19	11546268	11561782	+	H3K4me3-only	H3K4me3-only	H3K4me3-only	H3K4me3-only	H3K4me3-only	H3K4me3-only	H3K4me3-only	H3K4me3-only	H3K4me3-only	H3K4me3-only	H3K4me3-only	H3K4me3-only	H3K4me3-only	H3K4me3-only	H3K4me3-only	H3K4me3-only	H3K4me3-only	H3K4me3-only	H3K4me3-only	H3K4me3-only
NM_001001330	REEP3	chr10	65281122	65384883	+	H3K4me3-only	H3K4me3-only	H3K4me3-only	H3K4me3-only	H3K4me3-only	H3K4me3-only	H3K4me3-only	H3K4me3-only	H3K4me3-only	H3K4me3-only	H3K4me3-only	H3K4me3-only	H3K4me3-only	H3K4me3-only	H3K4me3-only	H3K4me3-only	H3K4me3-only	H3K4me3-only	H3K4me3-only	H3K4me3-only
NM_001001331	ATP2B2	chr3	10365706	10547268	-	H3K4me3-only	Bivalent	H3K4me3-only	Bivalent	Bivalent	Bivalent	H3K27me3-only	H3K27me3-only	H3K27me3-only	H3K27me3-only	H3K27me3-only	H3K27me3-only	Bivalent	H3K27me3-only	Unmarked	H3K4me3-only	Unmarked	Unmarked	Unmarked	Unmarked
NM_001001343	FNDC9	chr5	156768606	156772729	-	Unmarked	Unmarked	Unmarked	Unmarked	Unmarked	Unmarked	Unmarked	Unmarked	Unmarked	Unmarked	Unmarked	Unmarked	Unmarked	Unmarked	Unmarked	Unmarked	Unmarked	Unmarked	Unmarked	Unmarked
NM_001001346	CLDN20	chr6	155585146	155597682	+	Unmarked	Unmarked	Unmarked	Unmarked	Unmarked	Unmarked	Unmarked	Unmarked	Unmarked	Unmarked	Unmarked	Unmarked	Unmarked	Unmarked	Unmarked	Unmarked	Unmarked	Unmarked	Unmarked	Unmarked
NM_001001349	NKIRAS2	chr17	40169593	40177656	+	H3K4me3-only	H3K4me3-only	H3K4me3-only	H3K4me3-only	H3K4me3-only	H3K4me3-only	H3K4me3-only	H3K4me3-only	H3K4me3-only	H3K4me3-only	H3K4me3-only	H3K4me3-only	H3K4me3-only	H3K4me3-only	H3K4me3-only	H3K4me3-only	H3K4me3-only	H3K4me3-only	H3K4me3-only	H3K4me3-only
NM_001001394	DNAJB3	chr2	234651395	234652661	-	Unmarked	Unmarked	Unmarked	Unmarked	Unmarked	Unmarked	Unmarked	Unmarked	Unmarked	Unmarked	Unmarked	Unmarked	Unmarked	Unmarked	Unmarked	Unmarked	Unmarked	Unmarked	Unmarked	Unmarked
NM_001001410	TSR3	chr16	1399240	1401873	-	H3K4me3-only	H3K4me3-only	H3K4me3-only	H3K4me3-only	H3K4me3-only	H3K4me3-only	H3K4me3-only	H3K4me3-only	H3K4me3-only	H3K4me3-only	H3K4me3-only	H3K4me3-only	H3K4me3-only	H3K4me3-only	H3K4me3-only	H3K4me3-only	H3K4me3-only	H3K4me3-only	H3K4me3-only	H3K4me3-only
NM_001001411	ZNF676	chr19	22361902	22379753	-	Unmarked	Unmarked	Unmarked	Unmarked	Unmarked	Unmarked	Unmarked	Unmarked	Unmarked	Unmarked	Unmarked	Unmarked	Unmarked	Unmarked	Unmarked	Unmarked	Unmarked	Unmarked	Unmarked	Unmarked
NM_001001412	CALHM1	chr10	105213143	105218648	-	Unmarked	Unmarked	Unmarked	H3K27me3-only	Bivalent	Unmarked	Unmarked	Unmarked	H3K27me3-only	H3K27me3-only	Unmarked	Unmarked	Unmarked	Unmarked	Unmarked	Unmarked	Unmarked	Unmarked	Unmarked	Unmarked
NM_001001413	GOLGA6L1	chr15	22736245	22746002	+	Unmarked	Unmarked	Unmarked	Unmarked	Unmarked	Unmarked	Unmarked	Unmarked	Unmarked	Unmarked	Unmarked	Unmarked	Unmarked	Unmarked	Unmarked	Unmarked	Unmarked	Unmarked	Unmarked	Unmarked
NM_001001414	NCCRP1	chr19	39687603	39692522	+	Bivalent	Bivalent	H3K27me3-only	Bivalent	Bivalent	Bivalent	H3K27me3-only	H3K27me3-only	H3K27me3-only	Bivalent	Bivalent	Bivalent	H3K27me3-only	H3K27me3-only	H3K27me3-only	Unmarked	H3K4me3-only	Unmarked	Unmarked	Unmarked
NM_001001415	ZNF429	chr19	21688436	21721079	+	H3K4me3-only	H3K4me3-only	H3K4me3-only	H3K4me3-only	H3K4me3-only	H3K4me3-only	H3K4me3-only	H3K4me3-only	H3K4me3-only	H3K4me3-only	H3K4me3-only	H3K4me3-only	H3K4me3-only	H3K4me3-only	H3K4me3-only	H3K4me3-only	H3K4me3-only	H3K4me3-only	H3K4me3-only	H3K4me3-only
NM_001001417	TBC1D3B	chr17	34493060	34503988	-	Unmarked	Unmarked	Unmarked	Unmarked	Unmarked	Unmarked	Unmarked	Unmarked	Unmarked	Unmarked	Unmarked	Unmarked	Unmarked	Unmarked	Unmarked	Unmarked	Unmarked	Unmarked	Unmarked	Unmarked
NM_001001418	TBC1D3C	chr17	34581084	34592032	-	Unmarked	Unmarked	Unmarked	Unmarked	Unmarked	Unmarked	Unmarked	Unmarked	Unmarked	Unmarked	Unmarked	Unmarked	Unmarked	Unmarked	Unmarked	Unmarked	Unmarked	Unmarked	Unmarked	Unmarked
NM_001001420	SMAD5	chr5	135468535	135518422	+	H3K4me3-only	H3K4me3-only	H3K4me3-only	H3K4me3-only	H3K4me3-only	H3K4me3-only	H3K4me3-only	H3K4me3-only	H3K4me3-only	H3K4me3-only	H3K4me3-only	H3K4me3-only	H3K4me3-only	H3K4me3-only	H3K4me3-only	H3K4me3-only	H3K4me3-only	H3K4me3-only	H3K4me3-only	H3K4me3-only
NM_001001436	C16orf87	chr16	46835958	46865074	-	H3K4me3-only	H3K4me3-only	Bivalent	H3K4me3-only	H3K4me3-only	H3K4me3-only	H3K4me3-only	H3K4me3-only	H3K4me3-only	H3K4me3-only	H3K4me3-only	H3K4me3-only	H3K4me3-only	H3K4me3-only	H3K4me3-only	H3K4me3-only	H3K4me3-only	H3K4me3-only	H3K4me3-only	H3K4me3-only
NM_001001438	LSS	chr21	47608359	47648738	-	H3K4me3-only	H3K4me3-only	H3K4me3-only	H3K4me3-only	H3K4me3-only	H3K4me3-only	H3K4me3-only	H3K4me3-only	H3K4me3-only	H3K4me3-only	H3K4me3-only	H3K4me3-only	H3K4me3-only	H3K4me3-only	H3K4me3-only	H3K4me3-only	H3K4me3-only	H3K4me3-only	H3K4me3-only	H3K4me3-only
NM_001001479	SLC35E4	chr22	31031792	31043862	+	H3K4me3-only	H3K4me3-only	H3K4me3-only	H3K4me3-only	H3K4me3-only	H3K4me3-only	H3K4me3-only	H3K4me3-only	H3K4me3-only	H3K4me3-only	H3K4me3-only	H3K4me3-only	H3K4me3-only	H3K4me3-only	H3K4me3-only	H3K4me3-only	H3K4me3-only	H3K4me3-only	H3K4me3-only	H3K4me3-only
NM_001001480	KRTAP5-5	chr11	1651032	1652159	+	Unmarked	H3K27me3-only	H3K27me3-only	H3K27me3-only	H3K27me3-only	H3K27me3-only	H3K27me3-only	H3K27me3-only	H3K27me3-only	H3K27me3-only	Unmarked	H3K27me3-only	H3K27me3-only	H3K27me3-only	Unmarked	Unmarked	Unmarked	Unmarked	Unmarked	Unmarked
NM_001001483	ZDHHC13	chr11	19138691	19197967	+	H3K4me3-only	H3K4me3-only	Bivalent	H3K4me3-only	H3K4me3-only	H3K4me3-only	H3K4me3-only	H3K4me3-only	H3K4me3-only	H3K4me3-only	H3K4me3-only	H3K4me3-only	H3K4me3-only	H3K4me3-only	H3K4me3-only	H3K4me3-only	H3K4me3-only	H3K4me3-only	H3K4me3-only	H3K4me3-only
NM_001001485	ATP2C1	chr3	130612858	130735555	+	H3K4me3-only	H3K4me3-only	Bivalent	H3K4me3-only	H3K4me3-only	H3K4me3-only	H3K4me3-only	H3K4me3-only	H3K4me3-only	H3K4me3-only	H3K4me3-only	H3K4me3-only	H3K4me3-only	H3K4me3-only	H3K4me3-only	H3K4me3-only	H3K4me3-only	H3K4me3-only	H3K4me3-only	H3K4me3-only
NM_001001486	ATP2C1	chr3	130613433	130735555	+	H3K4me3-only	H3K4me3-only	H3K4me3-only	H3K4me3-only	H3K4me3-only	H3K4me3-only	H3K4me3-only	H3K4me3-only	H3K4me3-only	H3K4me3-only	H3K4me3-only	H3K4me3-only	H3K4me3-only	H3K4me3-only	H3K4me3-only	H3K4me3-only	H3K4me3-only	H3K4me3-only	H3K4me3-only	H3K4me3-only
NM_001001502	SNCB	chr5	176047209	176057557	-	Bivalent	Bivalent	Bivalent	Bivalent	Bivalent	Bivalent	Bivalent	Bivalent	Bivalent	Bivalent	Bivalent	Bivalent	Bivalent	Bivalent	Bivalent	H3K4me3-only	Unmarked	Unmarked	Unmarked	Unmarked
NM_001001503	NDUFV3	chr21	44313377	44329773	+	H3K4me3-only	H3K4me3-only	H3K4me3-only	H3K4me3-only	H3K4me3-only	H3K4me3-only	H3K4me3-only	H3K4me3-only	H3K4me3-only	H3K4me3-only	H3K4me3-only	H3K4me3-only	H3K4me3-only	H3K4me3-only	H3K4me3-only	H3K4me3-only	H3K4me3-only	H3K4me3-only	H3K4me3-only	H3K4me3-only
NM_001001520	HDGFRP2	chr19	4472254	4502222	+	H3K4me3-only	H3K4me3-only	H3K4me3-only	H3K4me3-only	H3K4me3-only	H3K4me3-only	H3K4me3-only	H3K4me3-only	H3K4me3-only	H3K4me3-only	H3K4me3-only	H3K4me3-only	H3K4me3-only	H3K4me3-only	H3K4me3-only	H3K4me3-only	H3K4me3-only	H3K4me3-only	H3K4me3-only	H3K4me3-only
NM_001001521	UGP2	chr2	64068097	64118696	+	H3K4me3-only	H3K4me3-only	Bivalent	H3K4me3-only	H3K4me3-only	H3K4me3-only	H3K4me3-only	H3K4me3-only	H3K4me3-only	H3K4me3-only	H3K4me3-only	H3K4me3-only	H3K4me3-only	H3K4me3-only	H3K4me3-only	H3K4me3-only	H3K4me3-only	H3K4me3-only	H3K4me3-only	H3K4me3-only
NM_001001523	RORC	chr1	151778546	151798553	-	Unmarked	Unmarked	Unmarked	H3K27me3-only	H3K27me3-only	Unmarked	Unmarked	Unmarked	Unmarked	Unmarked	Unmarked	Unmarked	Unmarked	H3K27me3-only	Unmarked	Unmarked	Unmarked	Unmarked	Unmarked	Unmarked
NM_001001524	TM6SF2	chr19	19375173	19384074	-	H3K4me3-only	H3K4me3-only	H3K4me3-only	Bivalent	H3K4me3-only	H3K27me3-only	H3K4me3-only	H3K4me3-only	Bivalent	H3K4me3-only	H3K27me3-only	Unmarked	H3K4me3-only	Bivalent	Unmarked	H3K4me3-only	Unmarked	Unmarked	H3K4me3-only	Unmarked
NM_001001547	CD36	chr7	80231503	80303734	+	Unmarked	Unmarked	Unmarked	Unmarked	Unmarked	Unmarked	Unmarked	Unmarked	Unmarked	Unmarked	Unmarked	Unmarked	Unmarked	Unmarked	Unmarked	Unmarked	Unmarked	H3K4me3-only	Unmarked	Unmarked
NM_001001548	CD36	chr7	80267831	80308593	+	Unmarked	Unmarked	Unmarked	Unmarked	Unmarked	Unmarked	Unmarked	Unmarked	Unmarked	Unmarked	Unmarked	Unmarked	Unmarked	Unmarked	Unmarked	Unmarked	Unmarked	Unmarked	Unmarked	Unmarked
NM_001001550	GRB10	chr7	50657759	50772998	-	Unmarked	Unmarked	Unmarked	Unmarked	Unmarked	Unmarked	Unmarked	Unmarked	Unmarked	Unmarked	Unmarked	Unmarked	Unmarked	Unmarked	Unmarked	Unmarked	Unmarked	Unmarked	Unmarked	Unmarked
NM_001001555	GRB10	chr7	50657759	50861159	-	Bivalent	Bivalent	Bivalent	Bivalent	H3K4me3-only	H3K4me3-only	Bivalent	Bivalent	Bivalent	H3K4me3-only	Bivalent	Bivalent	H3K4me3-only	Bivalent	H3K4me3-only	H3K4me3-only	H3K4me3-only	H3K4me3-only	H3K4me3-only	H3K4me3-only
NM_001001556	GALK2	chr15	49447975	49622002	+	H3K4me3-only	H3K4me3-only	H3K4me3-only	H3K4me3-only	H3K4me3-only	H3K4me3-only	H3K4me3-only	H3K4me3-only	H3K4me3-only	H3K4me3-only	H3K4me3-only	H3K4me3-only	H3K4me3-only	H3K4me3-only	H3K4me3-only	H3K4me3-only	H3K4me3-only	H3K4me3-only	H3K4me3-only	H3K4me3-only
NM_001001557	GDF6	chr8	97154557	97173020	-	Bivalent	Bivalent	Bivalent	Bivalent	H3K4me3-only	Bivalent	Bivalent	Bivalent	Bivalent	Bivalent	Bivalent	Bivalent	Bivalent	Bivalent	H3K4me3-only	H3K4me3-only	H3K4me3-only	H3K4me3-only	H3K4me3-only	H3K4me3-only
NM_001001560	GGA1	chr22	38004480	38029571	+	H3K4me3-only	H3K4me3-only	Bivalent	H3K4me3-only	H3K4me3-only	H3K4me3-only	H3K4me3-only	H3K4me3-only	H3K4me3-only	H3K4me3-only	H3K4me3-only	H3K4me3-only	H3K4me3-only	H3K4me3-only	H3K4me3-only	H3K4me3-only	H3K4me3-only	H3K4me3-only	Unmarked	H3K4me3-only
NM_001001563	TIMM50	chr19	39971051	39981528	+	H3K4me3-only	H3K4me3-only	Bivalent	H3K4me3-only	H3K4me3-only	H3K4me3-only	H3K4me3-only	H3K4me3-only	H3K4me3-only	H3K4me3-only	H3K4me3-only	H3K4me3-only	H3K4me3-only	H3K4me3-only	H3K4me3-only	Unmarked	H3K4me3-only	H3K4me3-only	H3K4me3-only	H3K4me3-only
NM_001001574	PDE9A	chr21	44073861	44195618	+	H3K4me3-only	H3K4me3-only	Bivalent	Bivalent	Bivalent	Bivalent	H3K4me3-only	H3K4me3-only	Bivalent	Bivalent	Bivalent	Bivalent	H3K4me3-only	H3K27me3-only	H3K27me3-only	H3K4me3-only	H3K4me3-only	H3K4me3-only	H3K4me3-only	H3K4me3-only
NM_001001656	OR9A4	chr7	141618675	141619620	+	Unmarked	Unmarked	Unmarked	Unmarked	Unmarked	Unmarked	Unmarked	Unmarked	Unmarked	Unmarked	Unmarked	Unmarked	Unmarked	Unmarked	Unmarked	Unmarked	Unmarked	Unmarked	Unmarked	Unmarked
NM_001001657	OR2Y1	chr5	180166122	180167058	-	Unmarked	Unmarked	Unmarked	Unmarked	Unmarked	H3K27me3-only	Unmarked	Unmarked	Unmarked	Unmarked	Unmarked	Unmarked	H3K27me3-only	Unmarked	Unmarked	Unmarked	Unmarked	Unmarked	Unmarked	Unmarked
NM_001001658	OR9A2	chr7	142723286	142724219	-	Unmarked	Unmarked	Unmarked	Unmarked	Unmarked	Unmarked	Unmarked	Unmarked	Unmarked	Unmarked	Unmarked	Unmarked	Unmarked	Unmarked	Unmarked	Unmarked	Unmarked	Unmarked	Unmarked	Unmarked
NM_001001659	OR2A14	chr7	143826205	143827138	+	Unmarked	Unmarked	Unmarked	Unmarked	Unmarked	Unmarked	Unmarked	Unmarked	Unmarked	Unmarked	Unmarked	Unmarked	Unmarked	Unmarked	Unmarked	Unmarked	Unmarked	Unmarked	Unmarked	Unmarked
NM_001001660	LYRM5	chr12	25348149	25357949	+	H3K4me3-only	H3K4me3-only	H3K4me3-only	H3K4me3-only	H3K4me3-only	H3K4me3-only	H3K4me3-only	H3K4me3-only	H3K4me3-only	H3K4me3-only	H3K4me3-only	H3K4me3-only	H3K4me3-only	H3K4me3-only	H3K4me3-only	H3K4me3-only	H3K4me3-only	H3K4me3-only	H3K4me3-only	H3K4me3-only
NM_001001661	ZNF425	chr7	148799877	148823438	-	H3K4me3-only	H3K4me3-only	Bivalent	H3K4me3-only	H3K4me3-only	H3K4me3-only	H3K4me3-only	H3K4me3-only	H3K4me3-only	H3K4me3-only	H3K4me3-only	H3K4me3-only	H3K4me3-only	H3K4me3-only	H3K4me3-only	H3K4me3-only	H3K4me3-only	H3K4me3-only	H3K4me3-only	H3K4me3-only
NM_001001662	ZNF782	chr9	99579272	99616389	-	H3K4me3-only	H3K4me3-only	H3K4me3-only	H3K4me3-only	H3K4me3-only	H3K4me3-only	H3K4me3-only	H3K4me3-only	H3K4me3-only	H3K4me3-only	H3K4me3-only	H3K4me3-only	H3K4me3-only	H3K4me3-only	H3K4me3-only	H3K4me3-only	H3K4me3-only	H3K4me3-only	H3K4me3-only	H3K4me3-only
NM_001001663	TMEM211	chr22	25331207	25335314	-	Unmarked	Unmarked	Unmarked	Unmarked	Unmarked	Unmarked	Unmarked	Unmarked	Unmarked	Unmarked	Unmarked	Unmarked	Unmarked	Unmarked	Unmarked	Unmarked	Unmarked	Unmarked	Unmarked	Unmarked
NM_001001664	SPOPL	chr2	139259349	139330805	+	H3K4me3-only	H3K4me3-only	H3K4me3-only	H3K4me3-only	H3K4me3-only	H3K4me3-only	H3K4me3-only	H3K4me3-only	H3K4me3-only	H3K4me3-only	H3K4me3-only	H3K4me3-only	H3K4me3-only	H3K4me3-only	H3K4me3-only	H3K4me3-only	H3K4me3-only	H3K4me3-only	H3K4me3-only	H3K4me3-only
NM_001001665	CYP27C1	chr2	127941411	127963343	-	Unmarked	Unmarked	Unmarked	H3K27me3-only	Unmarked	Unmarked	Unmarked	Unmarked	Unmarked	Unmarked	Unmarked	Unmarked	H3K27me3-only	H3K27me3-only	Unmarked	Unmarked	Unmarked	Unmarked	Unmarked	Unmarked
NM_001001667	OR6V1	chr7	142749437	142750379	+	Unmarked	Unmarked	Unmarked	Unmarked	Unmarked	Unmarked	Unmarked	Unmarked	Unmarked	Unmarked	Unmarked	Unmarked	Unmarked	Unmarked	Unmarked	Unmarked	Unmarked	Unmarked	Unmarked	Unmarked
NM_001001668	ZNF470	chr19	57078889	57094262	+	H3K4me3-only	H3K4me3-only	H3K4me3-only	H3K4me3-only	H3K4me3-only	H3K4me3-only	H3K4me3-only	H3K4me3-only	H3K4me3-only	H3K4me3-only	H3K4me3-only	H3K4me3-only	H3K4me3-only	H3K4me3-only	H3K4me3-only	H3K4me3-only	H3K4me3-only	H3K4me3-only	H3K4me3-only	H3K4me3-only
NM_001001669	ARHGEF37	chr5	148961134	149014527	+	Bivalent	Bivalent	Bivalent	H3K4me3-only	H3K4me3-only	H3K4me3-only	H3K4me3-only	H3K4me3-only	H3K4me3-only	H3K4me3-only	H3K4me3-only	H3K4me3-only	H3K4me3-only	H3K4me3-only	H3K4me3-only	H3K4me3-only	H3K4me3-only	H3K4me3-only	H3K4me3-only	H3K4me3-only
NM_001001670	SPATA31D1	chr9	84603686	84610171	+	Unmarked	Unmarked	Unmarked	Unmarked	Unmarked	Unmarked	Unmarked	Unmarked	Unmarked	Unmarked	Unmarked	Unmarked	Unmarked	Unmarked	Unmarked	Unmarked	Unmarked	Unmarked	Unmarked	Unmarked
NM_001001671	MAP3K15	chrX	19378175	19533379	-	H3K4me3-only	Bivalent	Bivalent	Bivalent	H3K4me3-only	Bivalent	H3K27me3-only	H3K27me3-only	H3K27me3-only	H3K4me3-only	H3K4me3-only	H3K4me3-only	Bivalent	Unmarked	Unmarked	H3K4me3-only	Unmarked	Unmarked	Unmarked	H3K4me3-only
NM_001001674	OR4F15	chr15	102358389	102359328	+	Unmarked	Unmarked	Unmarked	Unmarked	Unmarked	Unmarked	Unmarked	Unmarked	Unmarked	Unmarked	Unmarked	Unmarked	Unmarked	Unmarked	Unmarked	Unmarked	Unmarked	Unmarked	Unmarked	Unmarked
NM_001001676	LCN9	chr9	138555167	138557755	+	Unmarked	Unmarked	Unmarked	H3K27me3-only	Unmarked	Unmarked	Unmarked	Unmarked	Unmarked	H3K27me3-only	Unmarked	Unmarked	H3K27me3-only	Unmarked	Unmarked	Unmarked	Unmarked	Unmarked	Unmarked	Unmarked
NM_001001683	MED11	chr17	4634722	4636896	+	H3K4me3-only	H3K4me3-only	H3K4me3-only	H3K4me3-only	H3K4me3-only	H3K4me3-only	H3K4me3-only	H3K4me3-only	H3K4me3-only	H3K4me3-only	H3K4me3-only	H3K4me3-only	H3K4me3-only	H3K4me3-only	H3K4me3-only	H3K4me3-only	H3K4me3-only	H3K4me3-only	H3K4me3-only	H3K4me3-only
NM_001001694	IL17REL	chr22	50432941	50451055	-	H3K27me3-only	H3K27me3-only	H3K27me3-only	H3K27me3-only	Bivalent	H3K27me3-only	H3K27me3-only	H3K27me3-only	H3K27me3-only	Bivalent	H3K27me3-only	H3K27me3-only	H3K27me3-only	H3K27me3-only	H3K27me3-only	Unmarked	Unmarked	Unmarked	Unmarked	Unmarked
NM_001001701	C4orf3	chr4	120217573	120221968	-	H3K4me3-only	H3K4me3-only	H3K4me3-only	H3K4me3-only	H3K4me3-only	H3K4me3-only	H3K4me3-only	H3K4me3-only	H3K4me3-only	H3K4me3-only	H3K4me3-only	H3K4me3-only	H3K4me3-only	H3K4me3-only	H3K4me3-only	H3K4me3-only	H3K4me3-only	H3K4me3-only	H3K4me3-only	H3K4me3-only
NM_001001709	C9orf170	chr9	89763558	89774641	+	Bivalent	Bivalent	H3K4me3-only	H3K4me3-only	H3K4me3-only	Bivalent	Bivalent	Bivalent	H3K4me3-only	H3K4me3-only	H3K27me3-only	H3K4me3-only	H3K4me3-only	H3K4me3-only	H3K4me3-only	H3K4me3-only	Unmarked	H3K4me3-only	H3K4me3-only	H3K4me3-only
NM_001001710	FAM166A	chr9	140138036	140142222	-	Unmarked	Unmarked	H3K27me3-only	Bivalent	H3K4me3-only	Unmarked	Unmarked	Unmarked	Unmarked	Unmarked	Unmarked	Unmarked	Unmarked	Unmarked	Unmarked	Unmarked	Unmarked	Unmarked	Unmarked	Unmarked
NM_001001711	DDI1	chr11	103907307	103909922	+	Unmarked	Unmarked	Unmarked	Unmarked	Unmarked	Unmarked	Unmarked	Unmarked	Unmarked	Unmarked	Unmarked	Unmarked	Unmarked	Unmarked	Unmarked	Unmarked	Unmarked	Unmarked	Unmarked	Unmarked
NM_001001712	LCN10	chr9	139632618	139637411	-	Unmarked	Unmarked	H3K27me3-only	H3K27me3-only	Bivalent	Unmarked	Bivalent	Bivalent	H3K27me3-only	Bivalent	H3K27me3-only	H3K27me3-only	Bivalent	H3K27me3-only	Unmarked	Unmarked	Unmarked	Unmarked	H3K4me3-only	Unmarked
NM_001001713	SH3BGR	chr21	40817796	40887433	+	H3K4me3-only	H3K4me3-only	H3K4me3-only	H3K4me3-only	H3K4me3-only	H3K4me3-only	H3K4me3-only	H3K4me3-only	H3K4me3-only	H3K4me3-only	H3K4me3-only	H3K4me3-only	H3K4me3-only	H3K4me3-only	H3K4me3-only	H3K4me3-only	H3K4me3-only	H3K4me3-only	H3K4me3-only	H3K4me3-only
NM_001001734	ATP1A4	chr1	160147200	160156767	+	Unmarked	Unmarked	Unmarked	H3K27me3-only	H3K27me3-only	Unmarked	H3K27me3-only	Unmarked	Unmarked	Unmarked	Unmarked	Unmarked	Unmarked	H3K27me3-only	Unmarked	Unmarked	Unmarked	Unmarked	Unmarked	Unmarked
NM_001001786	BLID	chr11	121986061	121986923	-	Unmarked	Unmarked	Unmarked	Unmarked	Unmarked	Unmarked	Unmarked	Unmarked	Unmarked	Unmarked	Unmarked	Unmarked	Unmarked	Unmarked	Unmarked	Unmarked	Unmarked	Unmarked	Unmarked	Unmarked
NM_001001788	RAET1G	chr6	150238013	150244214	-	Bivalent	Bivalent	Bivalent	Bivalent	Bivalent	Bivalent	Bivalent	Bivalent	H3K4me3-only	Bivalent	Bivalent	H3K4me3-only	H3K4me3-only	H3K4me3-only	H3K4me3-only	H3K4me3-only	H3K4me3-only	H3K4me3-only	H3K4me3-only	H3K4me3-only
NM_001001791	C10orf55	chr10	75669726	75682535	-	Unmarked	Unmarked	Unmarked	Unmarked	Unmarked	Unmarked	Unmarked	Unmarked	Unmarked	Unmarked	Unmarked	Unmarked	Unmarked	Unmarked	Unmarked	Unmarked	Unmarked	Unmarked	Unmarked	Unmarked
NM_001001794	DENND6B	chr22	50750391	50765489	-	Bivalent	Bivalent	H3K4me3-only	H3K4me3-only	H3K4me3-only	H3K4me3-only	H3K4me3-only	H3K4me3-only	H3K4me3-only	H3K4me3-only	H3K4me3-only	H3K4me3-only	H3K4me3-only	H3K4me3-only	H3K4me3-only	H3K4me3-only	H3K4me3-only	H3K4me3-only	H3K4me3-only	H3K4me3-only
NM_001001795	C8orf82	chr8	145751602	145754458	-	H3K4me3-only	H3K4me3-only	H3K4me3-only	H3K4me3-only	Bivalent	Bivalent	H3K4me3-only	H3K4me3-only	H3K4me3-only	H3K4me3-only	H3K4me3-only	H3K4me3-only	H3K4me3-only	H3K4me3-only	H3K4me3-only	H3K4me3-only	H3K4me3-only	H3K4me3-only	H3K4me3-only	H3K4me3-only
NM_001001821	OR2T34	chr1	248737101	248738058	-	Unmarked	Unmarked	Unmarked	Unmarked	Unmarked	Unmarked	Unmarked	Unmarked	Unmarked	Unmarked	Unmarked	Unmarked	Unmarked	Unmarked	Unmarked	Unmarked	Unmarked	Unmarked	Unmarked	Unmarked
NM_001001824	OR2T27	chr1	248813231	248814185	-	Unmarked	Unmarked	Unmarked	Unmarked	Unmarked	Unmarked	Unmarked	Unmarked	Unmarked	Unmarked	Unmarked	Unmarked	Unmarked	Unmarked	Unmarked	Unmarked	Unmarked	Unmarked	Unmarked	Unmarked
NM_001001827	OR2T35	chr1	248801587	248802559	-	Unmarked	Unmarked	Unmarked	Unmarked	Unmarked	Unmarked	Unmarked	Unmarked	Unmarked	Unmarked	Unmarked	Unmarked	Unmarked	Unmarked	Unmarked	Unmarked	Unmarked	Unmarked	Unmarked	Unmarked
NM_001001850	STX19	chr3	93733214	93747454	-	Unmarked	Unmarked	Unmarked	Unmarked	Unmarked	Unmarked	Unmarked	Unmarked	H3K4me3-only	Unmarked	Unmarked	H3K4me3-only	Unmarked	Unmarked	Unmarked	H3K4me3-only	Unmarked	Unmarked	Unmarked	Unmarked
NM_001001852	PIM3	chr22	50354142	50357720	+	Bivalent	H3K4me3-only	H3K4me3-only	Bivalent	H3K4me3-only	H3K4me3-only	H3K4me3-only	H3K4me3-only	H3K4me3-only	H3K4me3-only	H3K4me3-only	H3K4me3-only	H3K4me3-only	H3K4me3-only	H3K4me3-only	H3K4me3-only	H3K4me3-only	H3K4me3-only	H3K4me3-only	H3K4me3-only
NM_001001872	C14orf37	chr14	58470807	58618847	-	Bivalent	Bivalent	H3K4me3-only	Bivalent	Bivalent	Bivalent	Bivalent	Bivalent	Bivalent	H3K4me3-only	Bivalent	Bivalent	H3K4me3-only	Bivalent	Bivalent	H3K4me3-only	H3K4me3-only	H3K4me3-only	H3K4me3-only	H3K4me3-only
NM_001001888	VCX3B	chrX	8432870	8434551	+	Unmarked	Unmarked	Unmarked	Unmarked	Unmarked	Unmarked	Unmarked	Unmarked	Unmarked	Unmarked	Unmarked	Unmarked	Unmarked	Unmarked	Unmarked	Unmarked	Unmarked	Unmarked	Unmarked	Unmarked
NM_001001890	RUNX1	chr21	36160097	36260987	-	Bivalent	Bivalent	Bivalent	H3K4me3-only	H3K4me3-only	H3K4me3-only	Bivalent	Bivalent	H3K4me3-only	H3K4me3-only	H3K4me3-only	H3K4me3-only	H3K4me3-only	H3K4me3-only	H3K4me3-only	H3K4me3-only	H3K4me3-only	H3K4me3-only	H3K4me3-only	H3K4me3-only
NM_001001891	ANO7	chr2	242127923	242164791	+	Unmarked	Unmarked	Unmarked	H3K27me3-only	Bivalent	Unmarked	H3K4me3-only	H3K4me3-only	H3K27me3-only	H3K27me3-only	Unmarked	Unmarked	Unmarked	H3K27me3-only	Unmarked	Unmarked	Unmarked	Unmarked	H3K4me3-only	Unmarked
NM_001001894	TTC3	chr21	38445570	38575408	+	Bivalent	Bivalent	Bivalent	H3K4me3-only	H3K4me3-only	H3K4me3-only	H3K4me3-only	H3K4me3-only	H3K4me3-only	H3K4me3-only	H3K4me3-only	H3K4me3-only	H3K4me3-only	H3K4me3-only	H3K4me3-only	H3K4me3-only	H3K4me3-only	H3K4me3-only	H3K4me3-only	H3K4me3-only
NM_001001912	OR4E2	chr14	22133296	22134238	+	Unmarked	Unmarked	Unmarked	Unmarked	Unmarked	Unmarked	Unmarked	Unmarked	Unmarked	Unmarked	Unmarked	Unmarked	Unmarked	Unmarked	Unmarked	Unmarked	Unmarked	Unmarked	Unmarked	Unmarked
NM_001001913	OR52N1	chr11	5809083	5810046	-	Unmarked	Unmarked	Unmarked	Unmarked	Unmarked	Unmarked	Unmarked	Unmarked	Unmarked	Unmarked	Unmarked	Unmarked	Unmarked	Unmarked	Unmarked	Unmarked	Unmarked	Unmarked	Unmarked	Unmarked
NM_001001914	OR2G3	chr1	247768887	247769817	+	Unmarked	Unmarked	Unmarked	Unmarked	Unmarked	Unmarked	Unmarked	Unmarked	Unmarked	Unmarked	Unmarked	Unmarked	Unmarked	Unmarked	Unmarked	Unmarked	Unmarked	Unmarked	Unmarked	Unmarked
NM_001001915	OR2G2	chr1	247751661	247752615	+	Unmarked	Unmarked	Unmarked	Unmarked	Unmarked	Unmarked	Unmarked	Unmarked	Unmarked	Unmarked	Unmarked	Unmarked	Unmarked	Unmarked	Unmarked	Unmarked	Unmarked	Unmarked	Unmarked	Unmarked
NM_001001916	OR52J3	chr11	5067755	5068691	+	Unmarked	Unmarked	Unmarked	Unmarked	Unmarked	Unmarked	Unmarked	Unmarked	Unmarked	Unmarked	Unmarked	Unmarked	Unmarked	Unmarked	Unmarked	Unmarked	Unmarked	Unmarked	Unmarked	Unmarked
NM_001001917	OR56A1	chr11	6047900	6048971	-	Unmarked	Unmarked	Unmarked	Unmarked	Unmarked	Unmarked	Unmarked	Unmarked	Unmarked	Unmarked	Unmarked	Unmarked	Unmarked	Unmarked	Unmarked	Unmarked	Unmarked	Unmarked	Unmarked	Unmarked
NM_001001918	OR14C36	chr1	248512076	248513015	+	Unmarked	Unmarked	Unmarked	Unmarked	Unmarked	Unmarked	Unmarked	Unmarked	Unmarked	Unmarked	Unmarked	Unmarked	Unmarked	Unmarked	Unmarked	Unmarked	Unmarked	Unmarked	Unmarked	Unmarked
NM_001001919	OR13C4	chr9	107288533	107289490	-	Unmarked	Unmarked	Unmarked	Unmarked	Unmarked	Unmarked	Unmarked	Unmarked	Unmarked	Unmarked	Unmarked	Unmarked	Unmarked	Unmarked	Unmarked	Unmarked	Unmarked	Unmarked	Unmarked	Unmarked
NM_001001920	OR4C15	chr11	55321782	55322895	+	Unmarked	Unmarked	Unmarked	Unmarked	Unmarked	Unmarked	Unmarked	Unmarked	Unmarked	Unmarked	Unmarked	Unmarked	Unmarked	Unmarked	Unmarked	Unmarked	Unmarked	Unmarked	Unmarked	Unmarked
NM_001001921	OR5AS1	chr11	55797894	55798869	+	Unmarked	Unmarked	Unmarked	Unmarked	Unmarked	Unmarked	Unmarked	Unmarked	Unmarked	Unmarked	Unmarked	Unmarked	Unmarked	Unmarked	Unmarked	Unmarked	Unmarked	Unmarked	Unmarked	Unmarked
NM_001001922	OR52N5	chr11	5798863	5799897	-	Unmarked	Unmarked	Unmarked	Unmarked	Unmarked	Unmarked	Unmarked	Unmarked	Unmarked	Unmarked	Unmarked	Unmarked	Unmarked	Unmarked	Unmarked	Unmarked	Unmarked	Unmarked	Unmarked	Unmarked
NM_001001923	OR5C1	chr9	125551211	125552174	+	Unmarked	Unmarked	Unmarked	Unmarked	Unmarked	Unmarked	Unmarked	Unmarked	Unmarked	Unmarked	Unmarked	Unmarked	Unmarked	Unmarked	Unmarked	Unmarked	Unmarked	Unmarked	Unmarked	Unmarked
NM_001001925	MTUS1	chr8	17501302	17658426	-	H3K4me3-only	Bivalent	Bivalent	Bivalent	Bivalent	Bivalent	H3K4me3-only	H3K4me3-only	H3K4me3-only	H3K4me3-only	Bivalent	H3K4me3-only	H3K4me3-only	Bivalent	Bivalent	H3K4me3-only	H3K4me3-only	H3K4me3-only	H3K4me3-only	H3K4me3-only
NM_001001931	MTUS1	chr8	17501302	17579730	-	Unmarked	Unmarked	H3K4me3-only	Unmarked	Unmarked	H3K27me3-only	Unmarked	Unmarked	Unmarked	Unmarked	H3K27me3-only	Unmarked	Unmarked	Unmarked	Unmarked	Unmarked	Unmarked	Unmarked	Unmarked	Unmarked
NM_001001933	LHX8	chr1	75594118	75627218	+	H3K27me3-only	H3K27me3-only	H3K27me3-only	H3K27me3-only	H3K27me3-only	H3K27me3-only	H3K27me3-only	H3K27me3-only	Bivalent	H3K27me3-only	H3K27me3-only	H3K27me3-only	H3K27me3-only	H3K27me3-only	H3K27me3-only	Unmarked	Unmarked	Unmarked	Unmarked	Unmarked
NM_001001937	ATP5A1	chr18	43664109	43684199	-	H3K4me3-only	H3K4me3-only	H3K4me3-only	H3K4me3-only	H3K4me3-only	H3K4me3-only	H3K4me3-only	H3K4me3-only	H3K4me3-only	H3K4me3-only	H3K4me3-only	H3K4me3-only	H3K4me3-only	H3K4me3-only	H3K4me3-only	H3K4me3-only	H3K4me3-only	H3K4me3-only	H3K4me3-only	H3K4me3-only
NM_001001952	OR5D18	chr11	55587105	55588047	+	Unmarked	Unmarked	Unmarked	Unmarked	Unmarked	Unmarked	Unmarked	Unmarked	Unmarked	Unmarked	Unmarked	Unmarked	Unmarked	Unmarked	Unmarked	Unmarked	Unmarked	Unmarked	Unmarked	Unmarked
NM_001001953	OR10G9	chr11	123893719	123894655	+	Unmarked	Unmarked	Unmarked	Unmarked	Unmarked	Unmarked	Unmarked	Unmarked	Unmarked	Unmarked	Unmarked	Unmarked	Unmarked	Unmarked	Unmarked	Unmarked	Unmarked	Unmarked	Unmarked	Unmarked
NM_001001954	OR5A2	chr11	59189451	59190426	-	Unmarked	Unmarked	Unmarked	Unmarked	Unmarked	Unmarked	Unmarked	Unmarked	Unmarked	Unmarked	Unmarked	Unmarked	Unmarked	Unmarked	Unmarked	Unmarked	Unmarked	Unmarked	Unmarked	Unmarked
NM_001001955	OR4C13	chr11	49973942	49974971	+	Unmarked	Unmarked	Unmarked	Unmarked	Unmarked	Unmarked	Unmarked	Unmarked	Unmarked	Unmarked	Unmarked	Unmarked	Unmarked	Unmarked	Unmarked	Unmarked	Unmarked	Unmarked	Unmarked	Unmarked
NM_001001956	OR13C9	chr9	107379528	107380485	-	Unmarked	Unmarked	Unmarked	Unmarked	Unmarked	Unmarked	Unmarked	Unmarked	Unmarked	Unmarked	Unmarked	Unmarked	Unmarked	Unmarked	Unmarked	Unmarked	Unmarked	Unmarked	Unmarked	Unmarked
NM_001001957	OR2W3	chr1	248058888	248059833	+	Unmarked	Unmarked	Unmarked	Unmarked	Unmarked	Unmarked	Unmarked	Unmarked	Unmarked	Unmarked	Unmarked	Unmarked	Unmarked	Unmarked	Unmarked	Unmarked	Unmarked	Unmarked	Unmarked	Unmarked
NM_001001958	OR7G3	chr19	9236687	9237626	-	Unmarked	Unmarked	H3K27me3-only	Unmarked	Unmarked	Unmarked	Unmarked	Unmarked	Unmarked	Unmarked	Unmarked	Unmarked	H3K27me3-only	Unmarked	Unmarked	Unmarked	Unmarked	Unmarked	Unmarked	Unmarked
NM_001001959	OR11L1	chr1	248004229	248005198	-	Unmarked	Unmarked	Unmarked	Unmarked	Unmarked	Unmarked	Unmarked	Unmarked	Unmarked	Unmarked	Unmarked	Unmarked	Unmarked	Unmarked	Unmarked	Unmarked	Unmarked	Unmarked	Unmarked	Unmarked
NM_001001960	OR5W2	chr11	55681125	55682058	-	Unmarked	Unmarked	Unmarked	Unmarked	Unmarked	Unmarked	Unmarked	Unmarked	Unmarked	Unmarked	Unmarked	Unmarked	Unmarked	Unmarked	Unmarked	Unmarked	Unmarked	Unmarked	Unmarked	Unmarked
NM_001001961	OR13C3	chr9	107298050	107299094	-	Unmarked	Unmarked	Unmarked	Unmarked	Unmarked	Unmarked	Unmarked	Unmarked	Unmarked	Unmarked	Unmarked	Unmarked	Unmarked	Unmarked	Unmarked	Unmarked	Unmarked	Unmarked	Unmarked	Unmarked
NM_001001963	OR2L8	chr1	248112159	248113098	+	Unmarked	Unmarked	Unmarked	Unmarked	Unmarked	Unmarked	Unmarked	Unmarked	Unmarked	Unmarked	Unmarked	Unmarked	Unmarked	Unmarked	Unmarked	Unmarked	Unmarked	Unmarked	Unmarked	Unmarked
NM_001001964	OR2T11	chr1	248789478	248790429	-	Unmarked	Unmarked	Unmarked	Unmarked	Unmarked	Unmarked	Unmarked	Unmarked	Unmarked	Unmarked	Unmarked	Unmarked	Unmarked	Unmarked	Unmarked	Unmarked	Unmarked	Unmarked	Unmarked	Unmarked
NM_001001965	OR4D5	chr11	123810323	123811280	+	Unmarked	Unmarked	Unmarked	Unmarked	Unmarked	Unmarked	Unmarked	Unmarked	Unmarked	Unmarked	Unmarked	Unmarked	Unmarked	Unmarked	Unmarked	Unmarked	Unmarked	Unmarked	Unmarked	Unmarked
NM_001001966	OR14A16	chr1	247978101	247979031	-	Unmarked	Unmarked	Unmarked	Unmarked	Unmarked	Unmarked	Unmarked	Unmarked	Unmarked	Unmarked	Unmarked	Unmarked	Unmarked	Unmarked	Unmarked	Unmarked	Unmarked	Unmarked	Unmarked	Unmarked
NM_001001967	OR5D13	chr11	55540913	55541858	+	Unmarked	Unmarked	Unmarked	Unmarked	Unmarked	Unmarked	Unmarked	Unmarked	Unmarked	Unmarked	Unmarked	Unmarked	Unmarked	Unmarked	Unmarked	Unmarked	Unmarked	Unmarked	Unmarked	Unmarked
NM_001001968	OR6S1	chr14	21108854	21109850	-	Unmarked	Unmarked	Unmarked	Unmarked	Unmarked	Unmarked	Unmarked	Unmarked	Unmarked	Unmarked	Unmarked	Unmarked	Unmarked	Unmarked	Unmarked	Unmarked	Unmarked	Unmarked	Unmarked	Unmarked
NM_001001973	ATP5C1	chr10	7830092	7849762	+	H3K4me3-only	H3K4me3-only	H3K4me3-only	H3K4me3-only	H3K4me3-only	H3K4me3-only	H3K4me3-only	H3K4me3-only	H3K4me3-only	H3K4me3-only	H3K4me3-only	H3K4me3-only	H3K4me3-only	H3K4me3-only	H3K4me3-only	H3K4me3-only	H3K4me3-only	H3K4me3-only	H3K4me3-only	H3K4me3-only
NM_001001974	PLEKHA1	chr10	124134093	124191871	+	H3K4me3-only	Bivalent	Bivalent	H3K4me3-only	H3K4me3-only	Bivalent	H3K4me3-only	H3K4me3-only	H3K4me3-only	H3K4me3-only	H3K4me3-only	H3K4me3-only	H3K4me3-only	H3K4me3-only	H3K4me3-only	H3K4me3-only	H3K4me3-only	H3K4me3-only	H3K4me3-only	H3K4me3-only
NM_001001975	ATP5D	chr19	1241748	1244824	+	H3K4me3-only	H3K4me3-only	H3K4me3-only	H3K4me3-only	H3K4me3-only	H3K4me3-only	H3K4me3-only	H3K4me3-only	H3K4me3-only	H3K4me3-only	H3K4me3-only	H3K4me3-only	H3K4me3-only	H3K4me3-only	H3K4me3-only	H3K4me3-only	H3K4me3-only	H3K4me3-only	H3K4me3-only	H3K4me3-only
NM_001001976	ATE1	chr10	123502624	123687546	-	H3K4me3-only	H3K4me3-only	Bivalent	H3K4me3-only	H3K4me3-only	H3K4me3-only	H3K4me3-only	H3K4me3-only	H3K4me3-only	H3K4me3-only	H3K4me3-only	H3K4me3-only	H3K4me3-only	H3K4me3-only	H3K4me3-only	H3K4me3-only	H3K4me3-only	H3K4me3-only	H3K4me3-only	H3K4me3-only
NM_001001991	PAMR1	chr11	35453375	35547176	-	H3K4me3-only	Bivalent	Bivalent	H3K4me3-only	H3K4me3-only	Bivalent	Bivalent	Bivalent	H3K4me3-only	H3K4me3-only	H3K27me3-only	H3K4me3-only	H3K4me3-only	H3K4me3-only	H3K27me3-only	Unmarked	Unmarked	H3K4me3-only	Unmarked	H3K4me3-only
NM_001001994	GPM6B	chrX	13792092	13956831	-	H3K4me3-only	H3K4me3-only	H3K4me3-only	H3K4me3-only	H3K4me3-only	Bivalent	Bivalent	Bivalent	Bivalent	H3K4me3-only	Bivalent	H3K4me3-only	Bivalent	Bivalent	H3K27me3-only	H3K4me3-only	H3K4me3-only	H3K4me3-only	H3K4me3-only	H3K4me3-only
NM_001002	RPLP0	chr12	120634502	120639014	-	H3K4me3-only	H3K4me3-only	H3K4me3-only	H3K4me3-only	H3K4me3-only	H3K4me3-only	H3K4me3-only	H3K4me3-only	H3K4me3-only	H3K4me3-only	H3K4me3-only	H3K4me3-only	H3K4me3-only	H3K4me3-only	H3K4me3-only	H3K4me3-only	H3K4me3-only	H3K4me3-only	H3K4me3-only	H3K4me3-only
NM_001002000	GMPR2	chr14	24701647	24708447	+	H3K4me3-only	H3K4me3-only	H3K4me3-only	H3K4me3-only	H3K4me3-only	H3K4me3-only	H3K4me3-only	H3K4me3-only	H3K4me3-only	H3K4me3-only	H3K4me3-only	H3K4me3-only	H3K4me3-only	H3K4me3-only	H3K4me3-only	H3K4me3-only	H3K4me3-only	H3K4me3-only	H3K4me3-only	H3K4me3-only
NM_001002002	GMPR2	chr14	24702102	24708447	+	H3K4me3-only	H3K4me3-only	H3K4me3-only	H3K4me3-only	H3K4me3-only	H3K4me3-only	H3K4me3-only	H3K4me3-only	H3K4me3-only	H3K4me3-only	H3K4me3-only	H3K4me3-only	H3K4me3-only	H3K4me3-only	H3K4me3-only	H3K4me3-only	H3K4me3-only	H3K4me3-only	H3K4me3-only	H3K4me3-only
NM_001002009	NT5C3A	chr7	33053724	33102409	-	H3K4me3-only	H3K4me3-only	H3K4me3-only	H3K4me3-only	H3K4me3-only	H3K4me3-only	H3K4me3-only	H3K4me3-only	H3K4me3-only	H3K4me3-only	H3K4me3-only	H3K4me3-only	H3K4me3-only	H3K4me3-only	H3K4me3-only	H3K4me3-only	H3K4me3-only	H3K4me3-only	H3K4me3-only	H3K4me3-only
NM_001002017	HCFC1R1	chr16	3072625	3074287	-	H3K4me3-only	H3K4me3-only	Bivalent	H3K4me3-only	H3K4me3-only	H3K4me3-only	H3K4me3-only	H3K4me3-only	H3K4me3-only	H3K4me3-only	H3K4me3-only	H3K4me3-only	H3K4me3-only	H3K4me3-only	H3K4me3-only	H3K4me3-only	H3K4me3-only	H3K4me3-only	H3K4me3-only	H3K4me3-only
NM_001002019	PUS1	chr12	132413797	132428406	+	H3K4me3-only	H3K4me3-only	H3K4me3-only	H3K4me3-only	H3K4me3-only	H3K4me3-only	H3K4me3-only	H3K4me3-only	H3K4me3-only	H3K4me3-only	H3K4me3-only	H3K4me3-only	H3K4me3-only	H3K4me3-only	H3K4me3-only	H3K4me3-only	H3K4me3-only	H3K4me3-only	H3K4me3-only	H3K4me3-only
NM_001002020	PUS1	chr12	132413744	132428406	+	H3K4me3-only	H3K4me3-only	H3K4me3-only	H3K4me3-only	H3K4me3-only	H3K4me3-only	H3K4me3-only	H3K4me3-only	H3K4me3-only	H3K4me3-only	H3K4me3-only	H3K4me3-only	H3K4me3-only	H3K4me3-only	H3K4me3-only	H3K4me3-only	H3K4me3-only	H3K4me3-only	H3K4me3-only	H3K4me3-only
NM_001002026	CLDN18	chr3	137717657	137752494	+	Unmarked	Unmarked	Unmarked	Unmarked	Unmarked	Unmarked	Unmarked	Unmarked	Unmarked	Unmarked	Unmarked	Unmarked	Unmarked	Unmarked	Unmarked	Unmarked	Unmarked	Unmarked	H3K4me3-only	Unmarked
NM_001002027	ATP5G1	chr17	46970147	46973232	+	H3K4me3-only	H3K4me3-only	H3K4me3-only	H3K4me3-only	H3K4me3-only	H3K4me3-only	H3K4me3-only	H3K4me3-only	H3K4me3-only	H3K4me3-only	H3K4me3-only	H3K4me3-only	H3K4me3-only	H3K4me3-only	H3K4me3-only	H3K4me3-only	H3K4me3-only	H3K4me3-only	H3K4me3-only	H3K4me3-only
NM_001002031	ATP5G2	chr12	54058943	54070512	-	H3K4me3-only	H3K4me3-only	H3K4me3-only	H3K4me3-only	H3K4me3-only	H3K4me3-only	H3K4me3-only	Bivalent	H3K4me3-only	H3K4me3-only	H3K4me3-only	H3K4me3-only	H3K4me3-only	H3K4me3-only	Unmarked	H3K4me3-only	H3K4me3-only	H3K4me3-only	H3K4me3-only	H3K4me3-only
NM_001002033	HN1	chr17	73131343	73150774	-	H3K4me3-only	H3K4me3-only	Bivalent	H3K4me3-only	H3K4me3-only	H3K4me3-only	H3K4me3-only	H3K4me3-only	H3K4me3-only	H3K4me3-only	H3K4me3-only	H3K4me3-only	H3K4me3-only	H3K4me3-only	H3K4me3-only	H3K4me3-only	H3K4me3-only	H3K4me3-only	H3K4me3-only	H3K4me3-only
NM_001002034	FAM109B	chr22	42470254	42475442	+	H3K4me3-only	Bivalent	H3K4me3-only	H3K4me3-only	H3K4me3-only	H3K4me3-only	H3K4me3-only	H3K4me3-only	H3K4me3-only	H3K4me3-only	H3K4me3-only	H3K4me3-only	H3K4me3-only	H3K4me3-only	H3K4me3-only	H3K4me3-only	H3K4me3-only	H3K4me3-only	H3K4me3-only	H3K4me3-only
NM_001002035	DEFB108B	chr11	71544245	71548608	+	Unmarked	Unmarked	Unmarked	Unmarked	Unmarked	Unmarked	Unmarked	Unmarked	Unmarked	Unmarked	Unmarked	Unmarked	Unmarked	Unmarked	Unmarked	Unmarked	Unmarked	Unmarked	Unmarked	Unmarked
NM_001002036	ASTL	chr2	96789588	96804175	-	Unmarked	Unmarked	H3K27me3-only	H3K27me3-only	H3K27me3-only	Unmarked	H3K4me3-only	Unmarked	H3K27me3-only	H3K27me3-only	Unmarked	Unmarked	Unmarked	H3K27me3-only	Unmarked	Unmarked	Unmarked	Unmarked	Unmarked	Unmarked
NM_001002231	KLK2	chr19	51376688	51383823	+	Unmarked	Unmarked	H3K27me3-only	Unmarked	Unmarked	H3K27me3-only	Unmarked	Unmarked	H3K27me3-only	H3K27me3-only	Unmarked	H3K27me3-only	H3K27me3-only	Unmarked	Unmarked	Unmarked	Unmarked	Unmarked	Unmarked	Unmarked
NM_001002236	SERPINA1	chr14	94843083	94857029	-	Unmarked	Unmarked	Unmarked	Unmarked	H3K27me3-only	Unmarked	Unmarked	Unmarked	Unmarked	Unmarked	H3K4me3-only	Unmarked	Unmarked	Unmarked	Unmarked	Unmarked	Unmarked	Unmarked	Unmarked	Unmarked
NM_001002249	ANAPC11	chr17	79849817	79858363	+	H3K4me3-only	H3K4me3-only	H3K4me3-only	H3K4me3-only	H3K4me3-only	H3K4me3-only	H3K4me3-only	H3K4me3-only	H3K4me3-only	H3K4me3-only	H3K4me3-only	H3K4me3-only	H3K4me3-only	H3K4me3-only	H3K4me3-only	H3K4me3-only	H3K4me3-only	H3K4me3-only	H3K4me3-only	H3K4me3-only
NM_001002252	ARL6IP4	chr12	123464606	123467460	+	H3K4me3-only	H3K4me3-only	H3K4me3-only	H3K4me3-only	H3K4me3-only	H3K4me3-only	H3K4me3-only	H3K4me3-only	H3K4me3-only	H3K4me3-only	H3K4me3-only	H3K4me3-only	H3K4me3-only	H3K4me3-only	H3K4me3-only	H3K4me3-only	H3K4me3-only	H3K4me3-only	H3K4me3-only	H3K4me3-only
NM_001002254	AWAT2	chrX	69260391	69269788	-	Unmarked	Unmarked	Unmarked	Unmarked	Unmarked	Unmarked	Unmarked	Unmarked	Unmarked	Unmarked	Unmarked	Unmarked	H3K27me3-only	Unmarked	Unmarked	Unmarked	Unmarked	Unmarked	Unmarked	Unmarked
NM_001002255	SUMO4	chr6	149721494	149722182	+	Unmarked	Unmarked	Unmarked	Unmarked	Unmarked	Unmarked	Unmarked	Unmarked	Unmarked	Unmarked	Unmarked	Unmarked	Unmarked	Unmarked	Unmarked	Unmarked	Unmarked	Unmarked	Unmarked	Unmarked
NM_001002257	LCLAT1	chr2	30670136	30867091	+	H3K4me3-only	H3K4me3-only	H3K4me3-only	H3K4me3-only	H3K4me3-only	H3K4me3-only	H3K4me3-only	H3K4me3-only	H3K4me3-only	H3K4me3-only	H3K4me3-only	H3K4me3-only	H3K4me3-only	H3K4me3-only	H3K4me3-only	H3K4me3-only	H3K4me3-only	H3K4me3-only	H3K4me3-only	H3K4me3-only
NM_001002258	ATP5G3	chr2	176040985	176046391	-	H3K4me3-only	H3K4me3-only	H3K4me3-only	H3K4me3-only	H3K4me3-only	H3K4me3-only	H3K4me3-only	H3K4me3-only	H3K4me3-only	H3K4me3-only	H3K4me3-only	H3K4me3-only	H3K4me3-only	H3K4me3-only	H3K4me3-only	H3K4me3-only	H3K4me3-only	H3K4me3-only	H3K4me3-only	H3K4me3-only
NM_001002261	ZFYVE27	chr10	99498233	99520664	+	Bivalent	H3K4me3-only	H3K4me3-only	H3K4me3-only	H3K4me3-only	H3K4me3-only	H3K4me3-only	H3K4me3-only	H3K4me3-only	H3K4me3-only	Unmarked	H3K4me3-only	H3K4me3-only	H3K4me3-only	H3K4me3-only	Unmarked	H3K4me3-only	Unmarked	H3K4me3-only	H3K4me3-only
NM_001002266	MARCH8	chr10	45952816	46030819	-	Unmarked	Unmarked	Unmarked	Unmarked	Unmarked	Unmarked	Unmarked	Unmarked	Unmarked	Unmarked	Unmarked	Unmarked	Unmarked	Unmarked	Unmarked	Unmarked	Unmarked	Unmarked	Unmarked	Unmarked
NM_001002294	FMO3	chr1	171060017	171086959	+	Unmarked	Unmarked	Unmarked	Unmarked	Unmarked	Unmarked	Unmarked	Unmarked	Unmarked	Unmarked	Unmarked	Unmarked	Unmarked	H3K4me3-only	Unmarked	Unmarked	Unmarked	Unmarked	Unmarked	Unmarked
NM_001002296	GOLGA7	chr8	41348172	41368499	+	H3K4me3-only	H3K4me3-only	H3K4me3-only	H3K4me3-only	H3K4me3-only	H3K4me3-only	H3K4me3-only	H3K4me3-only	H3K4me3-only	H3K4me3-only	H3K4me3-only	H3K4me3-only	H3K4me3-only	H3K4me3-only	H3K4me3-only	H3K4me3-only	H3K4me3-only	H3K4me3-only	H3K4me3-only	H3K4me3-only
NM_001002759	SFR1	chr10	105881928	105886143	+	H3K4me3-only	H3K4me3-only	H3K4me3-only	H3K4me3-only	H3K4me3-only	H3K4me3-only	H3K4me3-only	H3K4me3-only	H3K4me3-only	H3K4me3-only	H3K4me3-only	H3K4me3-only	H3K4me3-only	H3K4me3-only	H3K4me3-only	H3K4me3-only	H3K4me3-only	H3K4me3-only	H3K4me3-only	H3K4me3-only
NM_001002796	MCTP1	chr5	94042288	94417545	-	Unmarked	H3K4me3-only	H3K4me3-only	H3K4me3-only	H3K4me3-only	H3K4me3-only	Unmarked	Unmarked	H3K4me3-only	Unmarked	H3K4me3-only	H3K4me3-only	Unmarked	Unmarked	H3K4me3-only	H3K4me3-only	Unmarked	Unmarked	Unmarked	Unmarked
NM_001002800	SMC4	chr3	160117429	160152741	+	H3K4me3-only	H3K4me3-only	Bivalent	H3K4me3-only	H3K4me3-only	H3K4me3-only	H3K4me3-only	H3K4me3-only	H3K4me3-only	H3K4me3-only	H3K4me3-only	H3K4me3-only	H3K4me3-only	H3K4me3-only	H3K4me3-only	H3K4me3-only	H3K4me3-only	H3K4me3-only	H3K4me3-only	H3K4me3-only
NM_001002810	PDE4DIP	chr1	144951760	144995033	-	Unmarked	Unmarked	Unmarked	Unmarked	Unmarked	Unmarked	Unmarked	Unmarked	Unmarked	Unmarked	Unmarked	Unmarked	Unmarked	Unmarked	Unmarked	Unmarked	Unmarked	H3K4me3-only	Unmarked	Unmarked
NM_001002811	PDE4DIP	chr1	144890590	144932032	-	H3K4me3-only	H3K4me3-only	Bivalent	H3K4me3-only	H3K4me3-only	H3K4me3-only	H3K4me3-only	H3K4me3-only	H3K4me3-only	H3K4me3-only	H3K4me3-only	H3K4me3-only	H3K4me3-only	H3K4me3-only	H3K4me3-only	H3K4me3-only	H3K4me3-only	H3K4me3-only	H3K4me3-only	H3K4me3-only
NM_001002812	PDE4DIP	chr1	144890590	144995022	-	Unmarked	Unmarked	Unmarked	Unmarked	Unmarked	Unmarked	Unmarked	Unmarked	Unmarked	Unmarked	Unmarked	Unmarked	Unmarked	Unmarked	Unmarked	Unmarked	Unmarked	H3K4me3-only	Unmarked	Unmarked
NM_001002814	RAB11FIP1	chr8	37716464	37757015	-	H3K4me3-only	H3K4me3-only	Bivalent	Bivalent	H3K4me3-only	H3K4me3-only	H3K4me3-only	H3K4me3-only	H3K4me3-only	H3K4me3-only	H3K4me3-only	H3K4me3-only	H3K4me3-only	H3K4me3-only	H3K4me3-only	H3K4me3-only	H3K4me3-only	H3K4me3-only	H3K4me3-only	H3K4me3-only
NM_001002836	ZNF787	chr19	56598731	56632649	-	H3K4me3-only	H3K4me3-only	H3K4me3-only	H3K4me3-only	H3K4me3-only	H3K4me3-only	H3K4me3-only	H3K4me3-only	H3K4me3-only	H3K4me3-only	H3K4me3-only	H3K4me3-only	H3K4me3-only	H3K4me3-only	H3K4me3-only	H3K4me3-only	H3K4me3-only	H3K4me3-only	H3K4me3-only	H3K4me3-only
NM_001002837	INPP5J	chr22	31518960	31530683	+	H3K4me3-only	H3K4me3-only	H3K4me3-only	Bivalent	Bivalent	Unmarked	H3K4me3-only	H3K4me3-only	H3K4me3-only	H3K4me3-only	Unmarked	H3K4me3-only	H3K4me3-only	H3K27me3-only	Unmarked	H3K4me3-only	H3K4me3-only	H3K4me3-only	H3K4me3-only	H3K4me3-only
NM_001002841	MYL4	chr17	45286427	45301045	+	Unmarked	Unmarked	Unmarked	H3K27me3-only	Unmarked	Unmarked	Unmarked	Unmarked	Unmarked	Unmarked	Unmarked	Unmarked	Unmarked	Unmarked	Unmarked	Unmarked	Unmarked	Unmarked	Unmarked	Unmarked
NM_001002843	ZNF280D	chr15	56922373	57025787	-	H3K4me3-only	H3K4me3-only	H3K4me3-only	H3K4me3-only	H3K4me3-only	H3K4me3-only	H3K4me3-only	H3K4me3-only	H3K4me3-only	H3K4me3-only	H3K4me3-only	H3K4me3-only	H3K4me3-only	H3K4me3-only	H3K4me3-only	H3K4me3-only	H3K4me3-only	H3K4me3-only	H3K4me3-only	H3K4me3-only
NM_001002857	ANXA2	chr15	60639349	60690185	-	Bivalent	H3K4me3-only	Bivalent	H3K4me3-only	H3K4me3-only	H3K4me3-only	H3K4me3-only	H3K4me3-only	H3K4me3-only	H3K4me3-only	H3K4me3-only	H3K4me3-only	H3K4me3-only	H3K4me3-only	H3K4me3-only	H3K4me3-only	H3K4me3-only	H3K4me3-only	H3K4me3-only	H3K4me3-only
NM_001002876	CENPM	chr22	42334740	42343148	-	H3K4me3-only	H3K4me3-only	H3K4me3-only	H3K4me3-only	H3K4me3-only	H3K4me3-only	H3K4me3-only	H3K4me3-only	H3K4me3-only	H3K4me3-only	H3K4me3-only	H3K4me3-only	H3K4me3-only	H3K4me3-only	H3K4me3-only	H3K4me3-only	H3K4me3-only	H3K4me3-only	H3K4me3-only	H3K4me3-only
NM_001002877	THOC5	chr22	29904155	29949736	-	H3K4me3-only	H3K4me3-only	H3K4me3-only	H3K4me3-only	H3K4me3-only	H3K4me3-only	H3K4me3-only	H3K4me3-only	H3K4me3-only	H3K4me3-only	H3K4me3-only	H3K4me3-only	H3K4me3-only	H3K4me3-only	H3K4me3-only	H3K4me3-only	H3K4me3-only	H3K4me3-only	H3K4me3-only	H3K4me3-only
NM_001002879	THOC5	chr22	29904155	29949644	-	H3K4me3-only	H3K4me3-only	H3K4me3-only	H3K4me3-only	H3K4me3-only	H3K4me3-only	H3K4me3-only	H3K4me3-only	H3K4me3-only	H3K4me3-only	H3K4me3-only	H3K4me3-only	H3K4me3-only	H3K4me3-only	H3K4me3-only	H3K4me3-only	H3K4me3-only	H3K4me3-only	H3K4me3-only	H3K4me3-only
NM_001002880	CBY1	chr22	39052657	39069855	+	H3K4me3-only	H3K4me3-only	H3K4me3-only	H3K4me3-only	H3K4me3-only	H3K4me3-only	H3K4me3-only	H3K4me3-only	H3K4me3-only	H3K4me3-only	H3K4me3-only	H3K4me3-only	H3K4me3-only	H3K4me3-only	H3K4me3-only	H3K4me3-only	H3K4me3-only	H3K4me3-only	H3K4me3-only	H3K4me3-only
NM_001002901	FCRLB	chr1	161692456	161697933	+	Unmarked	H3K27me3-only	H3K27me3-only	H3K4me3-only	Unmarked	Unmarked	H3K27me3-only	H3K27me3-only	Unmarked	Unmarked	Unmarked	Unmarked	Unmarked	Unmarked	Unmarked	Unmarked	Unmarked	Unmarked	Unmarked	Unmarked
NM_001002905	OR8G1	chr11	124120422	124135756	+	Unmarked	Unmarked	Unmarked	Unmarked	Unmarked	Unmarked	Unmarked	Unmarked	Unmarked	Unmarked	Unmarked	Unmarked	Unmarked	Unmarked	Unmarked	Unmarked	Unmarked	Unmarked	Unmarked	Unmarked
NM_001002907	OR8K1	chr11	56113514	56114474	+	Unmarked	Unmarked	Unmarked	Unmarked	Unmarked	Unmarked	Unmarked	Unmarked	Unmarked	Unmarked	Unmarked	Unmarked	Unmarked	Unmarked	Unmarked	Unmarked	Unmarked	Unmarked	Unmarked	Unmarked
NM_001002909	GPATCH8	chr17	42472644	42580957	-	H3K4me3-only	H3K4me3-only	H3K4me3-only	H3K4me3-only	H3K4me3-only	H3K4me3-only	H3K4me3-only	H3K4me3-only	H3K4me3-only	H3K4me3-only	H3K4me3-only	H3K4me3-only	H3K4me3-only	H3K4me3-only	H3K4me3-only	H3K4me3-only	H3K4me3-only	H3K4me3-only	H3K4me3-only	H3K4me3-only
NM_001002911	GPR139	chr16	20043042	20085100	-	Bivalent	Bivalent	Bivalent	H3K27me3-only	H3K27me3-only	H3K27me3-only	H3K27me3-only	H3K27me3-only	H3K27me3-only	H3K27me3-only	H3K27me3-only	H3K27me3-only	Bivalent	Unmarked	Unmarked	Unmarked	Unmarked	Unmarked	Unmarked	Unmarked
NM_001002912	C1orf173	chr1	75033794	75139422	-	Bivalent	Bivalent	H3K4me3-only	H3K4me3-only	H3K4me3-only	H3K4me3-only	H3K27me3-only	Bivalent	H3K27me3-only	Bivalent	Unmarked	Unmarked	H3K4me3-only	Bivalent	H3K27me3-only	H3K4me3-only	Unmarked	Unmarked	Unmarked	Unmarked
NM_001002913	PTRH1	chr9	130476226	130477936	-	H3K4me3-only	H3K4me3-only	H3K4me3-only	H3K4me3-only	H3K4me3-only	H3K4me3-only	H3K4me3-only	H3K4me3-only	H3K4me3-only	H3K4me3-only	H3K4me3-only	H3K4me3-only	H3K4me3-only	H3K4me3-only	H3K4me3-only	H3K4me3-only	H3K4me3-only	H3K4me3-only	H3K4me3-only	H3K4me3-only
NM_001002914	KCTD11	chr17	7255207	7258262	+	H3K4me3-only	H3K4me3-only	Bivalent	H3K4me3-only	H3K4me3-only	H3K4me3-only	H3K4me3-only	H3K4me3-only	H3K4me3-only	H3K4me3-only	H3K4me3-only	H3K4me3-only	H3K4me3-only	H3K4me3-only	H3K4me3-only	H3K4me3-only	H3K4me3-only	H3K4me3-only	H3K4me3-only	H3K4me3-only
NM_001002915	IGFL2	chr19	46651038	46664561	+	Unmarked	Unmarked	Unmarked	H3K27me3-only	H3K27me3-only	H3K27me3-only	Unmarked	Unmarked	Unmarked	H3K27me3-only	Unmarked	Unmarked	Unmarked	H3K27me3-only	H3K27me3-only	Unmarked	Unmarked	Unmarked	Unmarked	Unmarked
NM_001002916	H2BFWT	chrX	103265718	103268256	-	Unmarked	Unmarked	Unmarked	Unmarked	Unmarked	Unmarked	Unmarked	Unmarked	Unmarked	Unmarked	Unmarked	Unmarked	Unmarked	Unmarked	Unmarked	Unmarked	Unmarked	Unmarked	Unmarked	Unmarked
NM_001002917	OR8D1	chr11	124179735	124180662	-	Unmarked	Unmarked	Unmarked	Unmarked	Unmarked	Unmarked	Unmarked	Unmarked	Unmarked	Unmarked	Unmarked	Unmarked	Unmarked	Unmarked	Unmarked	Unmarked	Unmarked	Unmarked	Unmarked	Unmarked
NM_001002918	OR8D2	chr11	124189157	124190093	-	Unmarked	Unmarked	Unmarked	Unmarked	Unmarked	Unmarked	Unmarked	Unmarked	Unmarked	Unmarked	Unmarked	Unmarked	Unmarked	Unmarked	Unmarked	Unmarked	Unmarked	Unmarked	Unmarked	Unmarked
NM_001002919	FAM150B	chr2	279560	288308	-	Bivalent	Bivalent	Bivalent	Bivalent	Bivalent	Bivalent	H3K27me3-only	H3K27me3-only	Bivalent	Bivalent	Bivalent	Bivalent	Bivalent	H3K27me3-only	H3K27me3-only	H3K4me3-only	H3K4me3-only	H3K4me3-only	H3K4me3-only	H3K4me3-only
NM_001002923	IGFL4	chr19	46543005	46544274	-	Unmarked	Unmarked	Unmarked	H3K27me3-only	H3K27me3-only	H3K27me3-only	H3K27me3-only	Unmarked	H3K27me3-only	H3K27me3-only	H3K27me3-only	H3K27me3-only	Unmarked	H3K27me3-only	Unmarked	Unmarked	Unmarked	Unmarked	Unmarked	Unmarked
NM_001002925	OR5AP2	chr11	56408964	56409915	-	Unmarked	Unmarked	Unmarked	Unmarked	Unmarked	Unmarked	Unmarked	Unmarked	Unmarked	Unmarked	Unmarked	Unmarked	Unmarked	Unmarked	Unmarked	Unmarked	Unmarked	Unmarked	Unmarked	Unmarked
NM_001002926	TWISTNB	chr7	19735084	19748660	-	H3K4me3-only	H3K4me3-only	H3K4me3-only	H3K4me3-only	H3K4me3-only	H3K4me3-only	H3K4me3-only	H3K4me3-only	H3K4me3-only	H3K4me3-only	H3K4me3-only	H3K4me3-only	H3K4me3-only	H3K4me3-only	H3K4me3-only	H3K4me3-only	H3K4me3-only	H3K4me3-only	H3K4me3-only	H3K4me3-only
NM_001003395	TPD52L1	chr6	125475419	125584644	+	Bivalent	Bivalent	Bivalent	Bivalent	H3K4me3-only	H3K4me3-only	H3K4me3-only	H3K4me3-only	H3K4me3-only	H3K4me3-only	H3K4me3-only	H3K4me3-only	H3K4me3-only	H3K4me3-only	H3K4me3-only	H3K4me3-only	H3K4me3-only	H3K4me3-only	H3K4me3-only	H3K4me3-only
NM_001003396	TPD52L1	chr6	125474878	125584644	+	Bivalent	Bivalent	Bivalent	Bivalent	H3K4me3-only	H3K4me3-only	H3K4me3-only	H3K4me3-only	H3K4me3-only	H3K4me3-only	H3K4me3-only	H3K4me3-only	H3K4me3-only	H3K4me3-only	H3K4me3-only	H3K4me3-only	H3K4me3-only	H3K4me3-only	H3K4me3-only	H3K4me3-only
NM_001003407	ABLIM1	chr10	116190868	116444414	-	Unmarked	Unmarked	Unmarked	H3K4me3-only	H3K4me3-only	Unmarked	H3K4me3-only	H3K4me3-only	H3K4me3-only	Unmarked	Unmarked	H3K4me3-only	H3K4me3-only	H3K4me3-only	H3K4me3-only	Unmarked	H3K4me3-only	H3K4me3-only	Unmarked	Unmarked
NM_001003443	OR56A3	chr11	5968576	5969524	+	Unmarked	Unmarked	Unmarked	Unmarked	Unmarked	Unmarked	Unmarked	Unmarked	Unmarked	Unmarked	Unmarked	Unmarked	Unmarked	Unmarked	Unmarked	Unmarked	Unmarked	Unmarked	Unmarked	Unmarked
NM_001003665	C1orf95	chr1	226736500	226796915	+	Bivalent	Bivalent	Bivalent	Bivalent	Bivalent	Bivalent	Bivalent	Bivalent	Bivalent	Bivalent	Bivalent	Bivalent	H3K4me3-only	Bivalent	H3K27me3-only	H3K4me3-only	H3K4me3-only	H3K4me3-only	H3K4me3-only	H3K4me3-only
NM_001003675	LDLRAD4	chr18	13611462	13652753	+	Bivalent	Bivalent	H3K4me3-only	Bivalent	Bivalent	H3K4me3-only	Bivalent	Bivalent	Bivalent	Bivalent	Unmarked	Bivalent	H3K4me3-only	Bivalent	H3K4me3-only	H3K4me3-only	Unmarked	H3K4me3-only	H3K4me3-only	Unmarked
NM_001003682	TMEM200B	chr1	29445936	29450421	-	Bivalent	Bivalent	Bivalent	Bivalent	Bivalent	Bivalent	Bivalent	Bivalent	Bivalent	Bivalent	Bivalent	Bivalent	H3K4me3-only	H3K4me3-only	H3K4me3-only	H3K4me3-only	H3K4me3-only	H3K4me3-only	H3K4me3-only	H3K4me3-only
NM_001003688	SMAD1	chr4	146403956	146480325	+	H3K4me3-only	H3K4me3-only	Bivalent	H3K4me3-only	H3K4me3-only	H3K4me3-only	H3K4me3-only	H3K4me3-only	H3K4me3-only	H3K4me3-only	H3K4me3-only	H3K4me3-only	H3K4me3-only	H3K4me3-only	H3K4me3-only	H3K4me3-only	H3K4me3-only	H3K4me3-only	H3K4me3-only	H3K4me3-only
NM_001003690	MAD2L1BP	chr6	43597278	43608688	+	H3K4me3-only	H3K4me3-only	H3K4me3-only	H3K4me3-only	H3K4me3-only	H3K4me3-only	H3K4me3-only	H3K4me3-only	H3K4me3-only	H3K4me3-only	H3K4me3-only	H3K4me3-only	H3K4me3-only	H3K4me3-only	H3K4me3-only	H3K4me3-only	H3K4me3-only	H3K4me3-only	H3K4me3-only	H3K4me3-only
NM_001003692	ZMAT5	chr22	30126944	30162969	-	H3K4me3-only	H3K4me3-only	H3K4me3-only	H3K4me3-only	H3K4me3-only	H3K4me3-only	H3K4me3-only	H3K4me3-only	H3K4me3-only	H3K4me3-only	H3K4me3-only	H3K4me3-only	H3K4me3-only	H3K4me3-only	H3K4me3-only	H3K4me3-only	H3K4me3-only	H3K4me3-only	H3K4me3-only	H3K4me3-only
NM_001003693	LY6G6F	chr6	31674683	31678372	+	Unmarked	Unmarked	H3K27me3-only	H3K27me3-only	Bivalent	Unmarked	Unmarked	Unmarked	Unmarked	Unmarked	Unmarked	Unmarked	Unmarked	Unmarked	Unmarked	Unmarked	Unmarked	Unmarked	Unmarked	Unmarked
NM_001003694	BRPF1	chr3	9773433	9789699	+	H3K4me3-only	H3K4me3-only	H3K4me3-only	H3K4me3-only	H3K4me3-only	H3K4me3-only	H3K4me3-only	H3K4me3-only	H3K4me3-only	H3K4me3-only	H3K4me3-only	H3K4me3-only	H3K4me3-only	H3K4me3-only	H3K4me3-only	H3K4me3-only	H3K4me3-only	H3K4me3-only	H3K4me3-only	H3K4me3-only
NM_001003697	ATP5J	chr21	27096790	27107965	-	H3K4me3-only	H3K4me3-only	H3K4me3-only	H3K4me3-only	H3K4me3-only	H3K4me3-only	H3K4me3-only	H3K4me3-only	H3K4me3-only	H3K4me3-only	H3K4me3-only	H3K4me3-only	H3K4me3-only	H3K4me3-only	H3K4me3-only	H3K4me3-only	H3K4me3-only	H3K4me3-only	H3K4me3-only	H3K4me3-only
NM_001003700	RREB1	chr6	7108085	7252213	+	Bivalent	H3K4me3-only	Bivalent	H3K4me3-only	Bivalent	H3K4me3-only	H3K4me3-only	H3K4me3-only	H3K4me3-only	H3K4me3-only	H3K4me3-only	H3K4me3-only	H3K4me3-only	H3K4me3-only	H3K4me3-only	H3K4me3-only	H3K4me3-only	H3K4me3-only	H3K4me3-only	H3K4me3-only
NM_001003702	ARHGEF35	chr7	143883175	143892791	-	Unmarked	Unmarked	Unmarked	Unmarked	Unmarked	Unmarked	Unmarked	Unmarked	Unmarked	Unmarked	Unmarked	Unmarked	Unmarked	Unmarked	Unmarked	Unmarked	Unmarked	Unmarked	Unmarked	Unmarked
NM_001003704	MTFP1	chr22	30821610	30825041	+	H3K4me3-only	H3K4me3-only	H3K4me3-only	H3K4me3-only	H3K4me3-only	H3K4me3-only	H3K4me3-only	H3K4me3-only	H3K4me3-only	H3K4me3-only	H3K4me3-only	H3K4me3-only	H3K4me3-only	H3K4me3-only	H3K4me3-only	H3K4me3-only	H3K4me3-only	H3K4me3-only	H3K4me3-only	H3K4me3-only
NM_001003716	RECQL5	chr17	73645793	73663269	-	H3K4me3-only	H3K4me3-only	H3K4me3-only	H3K4me3-only	H3K4me3-only	H3K4me3-only	H3K4me3-only	H3K4me3-only	H3K4me3-only	H3K4me3-only	H3K4me3-only	H3K4me3-only	H3K4me3-only	H3K4me3-only	H3K4me3-only	H3K4me3-only	H3K4me3-only	H3K4me3-only	H3K4me3-only	H3K4me3-only
NM_001003745	OR10A3	chr11	7960122	7961067	-	Unmarked	Unmarked	Unmarked	Unmarked	Unmarked	Unmarked	Unmarked	Unmarked	Unmarked	H3K27me3-only	Unmarked	Unmarked	Unmarked	Unmarked	Unmarked	Unmarked	Unmarked	Unmarked	Unmarked	Unmarked
NM_001003750	OR8I2	chr11	55860783	55861716	+	Unmarked	Unmarked	Unmarked	Unmarked	Unmarked	Unmarked	Unmarked	Unmarked	Unmarked	Unmarked	Unmarked	Unmarked	Unmarked	Unmarked	Unmarked	Unmarked	Unmarked	Unmarked	Unmarked	Unmarked
NM_001003760	KLHL31	chr6	53512698	53530506	-	Unmarked	Unmarked	Unmarked	Unmarked	Unmarked	Unmarked	Unmarked	Unmarked	Unmarked	Unmarked	Unmarked	Unmarked	Unmarked	Unmarked	Unmarked	Unmarked	Unmarked	H3K4me3-only	Unmarked	Unmarked
NM_001003790	ERLIN2	chr8	37594196	37604071	+	H3K4me3-only	H3K4me3-only	H3K4me3-only	H3K4me3-only	H3K4me3-only	H3K4me3-only	H3K4me3-only	H3K4me3-only	H3K4me3-only	H3K4me3-only	H3K4me3-only	H3K4me3-only	H3K4me3-only	H3K4me3-only	H3K4me3-only	H3K4me3-only	H3K4me3-only	H3K4me3-only	H3K4me3-only	H3K4me3-only
NM_001003791	ERLIN2	chr8	37594096	37604071	+	H3K4me3-only	H3K4me3-only	H3K4me3-only	H3K4me3-only	H3K4me3-only	H3K4me3-only	H3K4me3-only	H3K4me3-only	H3K4me3-only	H3K4me3-only	H3K4me3-only	H3K4me3-only	H3K4me3-only	H3K4me3-only	H3K4me3-only	H3K4me3-only	H3K4me3-only	H3K4me3-only	H3K4me3-only	H3K4me3-only
NM_001003794	MGLL	chr3	127407904	127542093	-	Bivalent	Bivalent	Bivalent	H3K4me3-only	H3K4me3-only	H3K4me3-only	H3K4me3-only	H3K4me3-only	H3K4me3-only	Bivalent	Bivalent	H3K4me3-only	H3K4me3-only	H3K4me3-only	H3K4me3-only	H3K4me3-only	H3K4me3-only	H3K4me3-only	H3K4me3-only	H3K4me3-only
NM_001003795	GTF2IRD2B	chr7	74508346	74565623	+	Unmarked	Unmarked	H3K4me3-only	H3K4me3-only	H3K4me3-only	Unmarked	Unmarked	Unmarked	Unmarked	H3K4me3-only	Unmarked	Unmarked	Unmarked	Unmarked	Unmarked	Unmarked	Unmarked	Unmarked	Unmarked	Unmarked
NM_001003801	SMARCD3	chr7	150936058	150945749	-	Bivalent	Bivalent	H3K4me3-only	H3K4me3-only	H3K4me3-only	Bivalent	Bivalent	Bivalent	Bivalent	H3K4me3-only	Bivalent	H3K4me3-only	H3K4me3-only	H3K4me3-only	H3K4me3-only	H3K4me3-only	H3K4me3-only	H3K4me3-only	H3K4me3-only	H3K4me3-only
NM_001003802	SMARCD3	chr7	150936058	150973820	-	Bivalent	Bivalent	H3K4me3-only	Bivalent	Bivalent	H3K4me3-only	H3K27me3-only	H3K27me3-only	Bivalent	Bivalent	H3K4me3-only	H3K4me3-only	H3K4me3-only	Bivalent	Unmarked	H3K4me3-only	H3K4me3-only	Unmarked	H3K4me3-only	H3K4me3-only
NM_001003806	TARP	chr7	38299243	38313248	-	Unmarked	Unmarked	Unmarked	Unmarked	Unmarked	Unmarked	Unmarked	Unmarked	Unmarked	Unmarked	Unmarked	Unmarked	Unmarked	Unmarked	Unmarked	Unmarked	Unmarked	Unmarked	Unmarked	Unmarked
NM_001003809	DLGAP1	chr18	3496029	3845358	-	Unmarked	Unmarked	H3K4me3-only	Unmarked	Unmarked	Unmarked	Unmarked	Unmarked	Unmarked	Unmarked	Unmarked	Unmarked	Unmarked	H3K27me3-only	Unmarked	Unmarked	Unmarked	Unmarked	Unmarked	Unmarked
NM_001003811	TEX11	chrX	69748789	70128567	-	Unmarked	Unmarked	Unmarked	Unmarked	Unmarked	Unmarked	Unmarked	Unmarked	Unmarked	Unmarked	Unmarked	Unmarked	Unmarked	Unmarked	Unmarked	Unmarked	Unmarked	Unmarked	Unmarked	Unmarked
NM_001003819	TRIM6-TRIM34	chr11	5617864	5665625	+	H3K4me3-only	H3K4me3-only	H3K4me3-only	H3K4me3-only	H3K4me3-only	H3K4me3-only	H3K4me3-only	H3K4me3-only	H3K4me3-only	H3K4me3-only	Unmarked	Unmarked	H3K4me3-only	H3K4me3-only	H3K4me3-only	H3K4me3-only	H3K4me3-only	H3K4me3-only	Unmarked	H3K4me3-only
NM_001003827	TRIM34	chr11	5641173	5665625	+	Unmarked	Unmarked	Unmarked	Unmarked	Unmarked	Unmarked	Unmarked	Unmarked	H3K4me3-only	Unmarked	Unmarked	Unmarked	Unmarked	Unmarked	Unmarked	Unmarked	Unmarked	Unmarked	Unmarked	Unmarked
NM_001003828	PARVB	chr22	44395090	44565112	+	Unmarked	Unmarked	Unmarked	Unmarked	Unmarked	Unmarked	Unmarked	Unmarked	Unmarked	Unmarked	Unmarked	Unmarked	Unmarked	Unmarked	Unmarked	Unmarked	Unmarked	Unmarked	Unmarked	Unmarked
NM_001003841	SLC6A19	chr5	1201709	1225230	+	Unmarked	Unmarked	H3K27me3-only	H3K27me3-only	H3K27me3-only	H3K27me3-only	H3K4me3-only	H3K4me3-only	H3K27me3-only	H3K27me3-only	Unmarked	H3K27me3-only	H3K27me3-only	Unmarked	Unmarked	Unmarked	Unmarked	Unmarked	Unmarked	Unmarked
NM_001003845	SP5	chr2	171571856	171574498	+	Bivalent	Bivalent	Bivalent	Bivalent	Bivalent	Bivalent	Bivalent	Bivalent	Bivalent	Bivalent	Bivalent	Bivalent	Bivalent	Bivalent	Bivalent	H3K4me3-only	H3K4me3-only	H3K4me3-only	H3K4me3-only	H3K4me3-only
NM_001003891	MED15	chr22	20861885	20941919	+	H3K4me3-only	H3K4me3-only	H3K4me3-only	H3K4me3-only	H3K4me3-only	H3K4me3-only	H3K4me3-only	H3K4me3-only	H3K4me3-only	H3K4me3-only	H3K4me3-only	H3K4me3-only	H3K4me3-only	H3K4me3-only	H3K4me3-only	H3K4me3-only	H3K4me3-only	H3K4me3-only	H3K4me3-only	H3K4me3-only
NM_001003892	DUPD1	chr10	76797593	76818272	-	Unmarked	Unmarked	Unmarked	Unmarked	Unmarked	Unmarked	Unmarked	Unmarked	H3K4me3-only	Unmarked	Unmarked	Unmarked	H3K4me3-only	Unmarked	Unmarked	Unmarked	Unmarked	Unmarked	Unmarked	Unmarked
NM_001003897	MANBAL	chr20	35918050	35945663	+	H3K4me3-only	H3K4me3-only	H3K4me3-only	H3K4me3-only	H3K4me3-only	H3K4me3-only	H3K4me3-only	H3K4me3-only	H3K4me3-only	H3K4me3-only	H3K4me3-only	H3K4me3-only	H3K4me3-only	H3K4me3-only	H3K4me3-only	H3K4me3-only	H3K4me3-only	H3K4me3-only	H3K4me3-only	H3K4me3-only
NM_001003931	PARP3	chr3	51976360	51982883	+	H3K4me3-only	H3K4me3-only	H3K4me3-only	H3K4me3-only	H3K4me3-only	H3K4me3-only	H3K4me3-only	H3K4me3-only	H3K4me3-only	H3K4me3-only	H3K4me3-only	H3K4me3-only	H3K4me3-only	H3K4me3-only	H3K4me3-only	H3K4me3-only	H3K4me3-only	H3K4me3-only	H3K4me3-only	H3K4me3-only
NM_001003936	TXNDC8	chr9	113065866	113100125	-	Unmarked	Unmarked	Unmarked	Unmarked	Unmarked	Unmarked	Unmarked	Unmarked	Unmarked	Unmarked	Unmarked	Unmarked	Unmarked	Unmarked	Unmarked	Unmarked	Unmarked	Unmarked	Unmarked	Unmarked
NM_001003937	TSPYL6	chr2	54480314	54483409	-	Unmarked	Unmarked	Unmarked	Unmarked	Unmarked	Unmarked	Unmarked	Unmarked	Unmarked	Unmarked	Unmarked	Unmarked	Unmarked	Unmarked	Unmarked	Unmarked	Unmarked	Unmarked	Unmarked	Unmarked
NM_001003938	HBM	chr16	215972	216767	+	Bivalent	Bivalent	Bivalent	Bivalent	Bivalent	Bivalent	H3K27me3-only	H3K27me3-only	Bivalent	Bivalent	H3K27me3-only	Bivalent	Bivalent	H3K27me3-only	H3K27me3-only	Unmarked	Unmarked	Unmarked	Unmarked	Unmarked
NM_001003940	BMF	chr15	40380091	40401075	-	H3K4me3-only	H3K4me3-only	H3K4me3-only	H3K4me3-only	H3K4me3-only	H3K4me3-only	H3K4me3-only	H3K4me3-only	H3K4me3-only	H3K4me3-only	H3K4me3-only	H3K4me3-only	H3K4me3-only	H3K4me3-only	H3K4me3-only	H3K4me3-only	H3K4me3-only	H3K4me3-only	H3K4me3-only	H3K4me3-only
NM_001003942	BMF	chr15	40380091	40398287	-	Unmarked	Unmarked	Unmarked	H3K27me3-only	Bivalent	Unmarked	Unmarked	Unmarked	Unmarked	Unmarked	Unmarked	Unmarked	Unmarked	Unmarked	Unmarked	Unmarked	Unmarked	Unmarked	Unmarked	Unmarked
NM_001003943	BMF	chr15	40380090	40401085	-	H3K4me3-only	H3K4me3-only	H3K4me3-only	H3K4me3-only	H3K4me3-only	H3K4me3-only	H3K4me3-only	H3K4me3-only	H3K4me3-only	H3K4me3-only	H3K4me3-only	H3K4me3-only	H3K4me3-only	H3K4me3-only	H3K4me3-only	H3K4me3-only	H3K4me3-only	H3K4me3-only	H3K4me3-only	H3K4me3-only
NM_001003962	CAPNS1	chr19	36630917	36641255	+	H3K4me3-only	H3K4me3-only	Bivalent	H3K4me3-only	H3K4me3-only	H3K4me3-only	H3K4me3-only	H3K4me3-only	H3K4me3-only	H3K4me3-only	H3K4me3-only	H3K4me3-only	H3K4me3-only	H3K4me3-only	H3K4me3-only	H3K4me3-only	H3K4me3-only	H3K4me3-only	H3K4me3-only	H3K4me3-only
NM_001004	RPLP2	chr11	809935	812876	+	H3K4me3-only	H3K4me3-only	H3K4me3-only	H3K4me3-only	H3K4me3-only	H3K4me3-only	H3K4me3-only	H3K4me3-only	H3K4me3-only	H3K4me3-only	H3K4me3-only	H3K4me3-only	H3K4me3-only	H3K4me3-only	H3K4me3-only	H3K4me3-only	H3K4me3-only	H3K4me3-only	H3K4me3-only	H3K4me3-only
NM_001004019	FBLN2	chr3	13590624	13679922	+	Bivalent	H3K4me3-only	Bivalent	Bivalent	Bivalent	Bivalent	H3K27me3-only	H3K27me3-only	Bivalent	Bivalent	Bivalent	H3K27me3-only	H3K4me3-only	H3K4me3-only	Unmarked	Unmarked	H3K4me3-only	H3K4me3-only	Unmarked	Unmarked
NM_001004052	OR52B2	chr11	6190584	6191556	-	Unmarked	Unmarked	Unmarked	Unmarked	Unmarked	Unmarked	Unmarked	Unmarked	Unmarked	Unmarked	Unmarked	Unmarked	Unmarked	Unmarked	Unmarked	Unmarked	Unmarked	Unmarked	Unmarked	Unmarked
NM_001004055	LRRC29	chr16	67241041	67260901	-	H3K4me3-only	H3K4me3-only	H3K4me3-only	H3K4me3-only	H3K4me3-only	H3K4me3-only	H3K4me3-only	H3K4me3-only	H3K4me3-only	H3K4me3-only	H3K4me3-only	H3K4me3-only	H3K4me3-only	H3K4me3-only	H3K4me3-only	H3K4me3-only	H3K4me3-only	H3K4me3-only	H3K4me3-only	H3K4me3-only
NM_001004058	OR8K5	chr11	55926869	55927793	-	Unmarked	Unmarked	Unmarked	Unmarked	Unmarked	Unmarked	Unmarked	Unmarked	Unmarked	Unmarked	Unmarked	Unmarked	Unmarked	Unmarked	Unmarked	Unmarked	Unmarked	Unmarked	Unmarked	Unmarked
NM_001004059	OR4S2	chr11	55418379	55419315	+	Unmarked	Unmarked	Unmarked	Unmarked	Unmarked	Unmarked	Unmarked	Unmarked	Unmarked	Unmarked	Unmarked	Unmarked	Unmarked	Unmarked	Unmarked	Unmarked	Unmarked	Unmarked	Unmarked	Unmarked
NM_001004060	NOMO2	chr16	18511181	18573434	-	H3K4me3-only	H3K4me3-only	H3K4me3-only	H3K4me3-only	H3K4me3-only	H3K4me3-only	Unmarked	Unmarked	H3K4me3-only	H3K4me3-only	H3K4me3-only	H3K4me3-only	H3K4me3-only	H3K4me3-only	Unmarked	H3K4me3-only	H3K4me3-only	H3K4me3-only	H3K4me3-only	H3K4me3-only
NM_001004063	OR4K1	chr14	20403766	20404842	+	Unmarked	Unmarked	Unmarked	Unmarked	Unmarked	Unmarked	Unmarked	Unmarked	Unmarked	Unmarked	Unmarked	Unmarked	Unmarked	Unmarked	Unmarked	Unmarked	Unmarked	Unmarked	Unmarked	Unmarked
NM_001004064	OR8J3	chr11	55904246	55905194	-	Unmarked	Unmarked	Unmarked	Unmarked	Unmarked	Unmarked	Unmarked	Unmarked	Unmarked	Unmarked	Unmarked	Unmarked	Unmarked	Unmarked	Unmarked	Unmarked	Unmarked	Unmarked	Unmarked	Unmarked
NM_001004067	NOMO3	chr16	16326388	16388668	+	Unmarked	Unmarked	Unmarked	Unmarked	Unmarked	Unmarked	Unmarked	Unmarked	Unmarked	Unmarked	Unmarked	Unmarked	Unmarked	Unmarked	Unmarked	Unmarked	Unmarked	Unmarked	Unmarked	Unmarked
NM_001004105	GRK6	chr5	176853686	176868354	+	H3K4me3-only	H3K4me3-only	H3K4me3-only	H3K4me3-only	H3K4me3-only	H3K4me3-only	H3K4me3-only	H3K4me3-only	H3K4me3-only	H3K4me3-only	H3K4me3-only	H3K4me3-only	H3K4me3-only	H3K4me3-only	H3K4me3-only	H3K4me3-only	H3K4me3-only	H3K4me3-only	H3K4me3-only	H3K4me3-only
NM_001004124	OR4P4	chr11	55405833	55406772	+	Unmarked	Unmarked	Unmarked	Unmarked	Unmarked	Unmarked	Unmarked	Unmarked	Unmarked	Unmarked	Unmarked	Unmarked	Unmarked	Unmarked	Unmarked	Unmarked	Unmarked	Unmarked	Unmarked	Unmarked
NM_001004125	TUSC1	chr9	25676386	25678856	-	H3K4me3-only	H3K4me3-only	H3K4me3-only	H3K4me3-only	H3K4me3-only	H3K4me3-only	H3K4me3-only	H3K4me3-only	H3K4me3-only	H3K4me3-only	Unmarked	H3K4me3-only	H3K4me3-only	H3K4me3-only	H3K4me3-only	H3K4me3-only	H3K4me3-only	H3K4me3-only	H3K4me3-only	H3K4me3-only
NM_001004134	OR10AD1	chr12	48596121	48597075	-	H3K27me3-only	H3K27me3-only	Unmarked	Unmarked	Unmarked	Unmarked	Unmarked	Unmarked	Unmarked	Unmarked	Unmarked	Unmarked	Unmarked	Unmarked	Unmarked	Unmarked	Unmarked	Unmarked	Unmarked	Unmarked
NM_001004135	OR2A12	chr7	143792200	143793133	+	Unmarked	Unmarked	Unmarked	Unmarked	Unmarked	Unmarked	Unmarked	Unmarked	Unmarked	Unmarked	Unmarked	Unmarked	Unmarked	Unmarked	Unmarked	Unmarked	Unmarked	Unmarked	Unmarked	Unmarked
NM_001004136	OR2T2	chr1	248616098	248617073	+	Unmarked	Unmarked	Unmarked	Unmarked	Unmarked	Unmarked	Unmarked	Unmarked	Unmarked	Unmarked	Unmarked	Unmarked	Unmarked	Unmarked	Unmarked	Unmarked	Unmarked	Unmarked	Unmarked	Unmarked
NM_001004137	OR52M1	chr11	4566420	4567374	+	Unmarked	Unmarked	Unmarked	Unmarked	Unmarked	Unmarked	Unmarked	Unmarked	Unmarked	Unmarked	Unmarked	Unmarked	Unmarked	Unmarked	Unmarked	Unmarked	Unmarked	Unmarked	Unmarked	Unmarked
NM_001004195	OR4F4	chr15	102462344	102463262	-	Unmarked	Unmarked	Unmarked	Unmarked	Unmarked	Unmarked	Unmarked	Unmarked	Unmarked	Unmarked	Unmarked	Unmarked	Unmarked	Unmarked	Unmarked	Unmarked	Unmarked	Unmarked	Unmarked	Unmarked
NM_001004297	OR13A1	chr10	45798101	45811056	-	Unmarked	Unmarked	Unmarked	Unmarked	Unmarked	Unmarked	Unmarked	Unmarked	Unmarked	Unmarked	Unmarked	Unmarked	Unmarked	Unmarked	Unmarked	Unmarked	Unmarked	Unmarked	Unmarked	Unmarked
NM_001004298	C10orf90	chr10	128113573	128210010	-	Unmarked	Unmarked	Unmarked	Unmarked	Unmarked	Unmarked	Unmarked	Unmarked	Unmarked	Unmarked	Unmarked	Unmarked	Unmarked	H3K27me3-only	Unmarked	Unmarked	Unmarked	Unmarked	Unmarked	Unmarked
NM_001004301	ZNF813	chr19	53970988	53997546	+	H3K4me3-only	H3K4me3-only	H3K4me3-only	H3K4me3-only	H3K4me3-only	H3K4me3-only	H3K4me3-only	H3K4me3-only	H3K4me3-only	H3K4me3-only	H3K4me3-only	H3K4me3-only	H3K4me3-only	H3K4me3-only	H3K4me3-only	H3K4me3-only	H3K4me3-only	H3K4me3-only	H3K4me3-only	H3K4me3-only
NM_001004303	C1orf168	chr1	57184476	57285369	-	Unmarked	Unmarked	Unmarked	Unmarked	Unmarked	Unmarked	Unmarked	Unmarked	H3K4me3-only	Unmarked	Unmarked	Unmarked	Unmarked	Unmarked	Unmarked	H3K4me3-only	Unmarked	Unmarked	Unmarked	Unmarked
NM_001004304	ZNF740	chr12	53574534	53584654	+	H3K4me3-only	H3K4me3-only	H3K4me3-only	H3K4me3-only	H3K4me3-only	H3K4me3-only	H3K4me3-only	H3K4me3-only	H3K4me3-only	H3K4me3-only	H3K4me3-only	H3K4me3-only	H3K4me3-only	H3K4me3-only	H3K4me3-only	H3K4me3-only	H3K4me3-only	H3K4me3-only	H3K4me3-only	H3K4me3-only
NM_001004306	CCDC144NL	chr17	20766707	20799453	-	Unmarked	Unmarked	Unmarked	Unmarked	Unmarked	Unmarked	Unmarked	Unmarked	Unmarked	Unmarked	Unmarked	Unmarked	Unmarked	Unmarked	Unmarked	Unmarked	Unmarked	Unmarked	H3K4me3-only	Unmarked
NM_001004308	ZCCHC16	chrX	111326252	111700473	+	Bivalent	Bivalent	Bivalent	Unmarked	Unmarked	Bivalent	H3K27me3-only	H3K27me3-only	H3K27me3-only	H3K27me3-only	H3K27me3-only	H3K27me3-only	Bivalent	H3K27me3-only	Unmarked	Unmarked	Unmarked	Unmarked	Unmarked	H3K4me3-only
NM_001004309	ZNF774	chr15	90895476	90904715	+	H3K4me3-only	H3K4me3-only	H3K4me3-only	H3K4me3-only	H3K4me3-only	H3K4me3-only	H3K4me3-only	H3K4me3-only	H3K4me3-only	H3K4me3-only	H3K4me3-only	H3K4me3-only	H3K4me3-only	H3K4me3-only	H3K4me3-only	H3K4me3-only	H3K4me3-only	H3K4me3-only	H3K4me3-only	H3K4me3-only
NM_001004310	FCRL6	chr1	159772172	159786047	+	Unmarked	Unmarked	H3K27me3-only	H3K27me3-only	Unmarked	Unmarked	Unmarked	Unmarked	Unmarked	Unmarked	Unmarked	Unmarked	Unmarked	Unmarked	Unmarked	Unmarked	Unmarked	Unmarked	Unmarked	Unmarked
NM_001004311	FIGLA	chr2	71004441	71017775	-	Bivalent	Bivalent	Bivalent	Bivalent	Bivalent	Bivalent	H3K27me3-only	H3K27me3-only	Bivalent	Bivalent	Bivalent	H3K27me3-only	Bivalent	H3K27me3-only	H3K27me3-only	Unmarked	Unmarked	Unmarked	Unmarked	Unmarked
NM_001004312	RTP2	chr3	187416046	187420345	-	Unmarked	Unmarked	Unmarked	Unmarked	Unmarked	Unmarked	Unmarked	Unmarked	Unmarked	Unmarked	Unmarked	Unmarked	Unmarked	Unmarked	Unmarked	Unmarked	Unmarked	Unmarked	Unmarked	Unmarked
NM_001004313	TMEM220	chr17	10616638	10633646	-	H3K4me3-only	H3K4me3-only	H3K4me3-only	H3K4me3-only	H3K4me3-only	H3K4me3-only	H3K4me3-only	H3K4me3-only	H3K4me3-only	H3K4me3-only	H3K4me3-only	H3K4me3-only	H3K4me3-only	H3K4me3-only	H3K4me3-only	H3K4me3-only	H3K4me3-only	H3K4me3-only	H3K4me3-only	H3K4me3-only
NM_001004316	LEKR1	chr3	156544095	156763918	+	Bivalent	Bivalent	H3K4me3-only	H3K4me3-only	H3K4me3-only	H3K4me3-only	H3K4me3-only	H3K4me3-only	H3K4me3-only	H3K4me3-only	H3K4me3-only	H3K4me3-only	H3K4me3-only	H3K4me3-only	H3K4me3-only	H3K4me3-only	H3K4me3-only	H3K4me3-only	H3K4me3-only	H3K4me3-only
NM_001004317	LIN28B	chr6	105404922	105531207	+	H3K4me3-only	H3K4me3-only	H3K27me3-only	Bivalent	H3K27me3-only	H3K27me3-only	H3K27me3-only	H3K27me3-only	H3K27me3-only	H3K27me3-only	H3K27me3-only	H3K27me3-only	H3K27me3-only	H3K27me3-only	H3K27me3-only	Unmarked	Unmarked	Unmarked	Unmarked	Unmarked
NM_001004318	PAPL	chr19	39574944	39602128	+	Bivalent	Bivalent	Bivalent	Bivalent	Bivalent	H3K27me3-only	Bivalent	Bivalent	H3K4me3-only	H3K4me3-only	Bivalent	H3K4me3-only	Bivalent	Bivalent	H3K4me3-only	H3K4me3-only	H3K4me3-only	Unmarked	Unmarked	Unmarked
NM_001004319	VHLL	chr1	156268414	156269428	-	Unmarked	Unmarked	Unmarked	Unmarked	Unmarked	Unmarked	Unmarked	Unmarked	Unmarked	Unmarked	Unmarked	Unmarked	Unmarked	Unmarked	Unmarked	Unmarked	Unmarked	Unmarked	Unmarked	Unmarked
NM_001004320	AGMO	chr7	15239942	15601640	-	Unmarked	Unmarked	Unmarked	H3K4me3-only	Unmarked	Unmarked	H3K4me3-only	H3K4me3-only	Unmarked	Unmarked	Unmarked	Unmarked	Unmarked	Unmarked	Unmarked	Unmarked	Unmarked	Unmarked	Unmarked	Unmarked
NM_001004323	C7orf61	chr7	100054237	100061894	-	Unmarked	Unmarked	Unmarked	H3K4me3-only	H3K4me3-only	Unmarked	Unmarked	Unmarked	Unmarked	Unmarked	Unmarked	Unmarked	Unmarked	Unmarked	Unmarked	Unmarked	Unmarked	Unmarked	Unmarked	Unmarked
NM_001004325	KRTAP5-2	chr11	1618406	1619524	-	Unmarked	Unmarked	H3K27me3-only	H3K27me3-only	H3K27me3-only	H3K27me3-only	Unmarked	Unmarked	H3K27me3-only	H3K27me3-only	H3K27me3-only	H3K27me3-only	H3K27me3-only	H3K27me3-only	Unmarked	Unmarked	Unmarked	Unmarked	Unmarked	Unmarked
NM_001004328	ZNF705A	chr12	8325149	8332642	+	Unmarked	Unmarked	Unmarked	Unmarked	Unmarked	Unmarked	Unmarked	Unmarked	Unmarked	Unmarked	Unmarked	Unmarked	Unmarked	Unmarked	Unmarked	Unmarked	Unmarked	Unmarked	Unmarked	Unmarked
NM_001004329	DBX2	chr12	45408538	45444882	-	Bivalent	Bivalent	Bivalent	Bivalent	Bivalent	Bivalent	Bivalent	Bivalent	Bivalent	Bivalent	H3K27me3-only	Bivalent	H3K4me3-only	Bivalent	H3K27me3-only	H3K4me3-only	H3K4me3-only	H3K4me3-only	Unmarked	H3K4me3-only
NM_001004330	PLEKHG7	chr12	93130264	93165868	+	Unmarked	Unmarked	H3K27me3-only	Unmarked	Unmarked	Unmarked	Unmarked	Unmarked	Unmarked	Unmarked	Unmarked	Unmarked	Unmarked	Unmarked	Unmarked	Unmarked	Unmarked	Unmarked	Unmarked	Unmarked
NM_001004334	GPR179	chr17	36481492	36499693	-	Unmarked	Unmarked	Unmarked	H3K27me3-only	Bivalent	Unmarked	Unmarked	Unmarked	H3K27me3-only	Unmarked	Unmarked	Unmarked	H3K27me3-only	H3K27me3-only	Unmarked	Unmarked	Unmarked	Unmarked	Unmarked	Unmarked
NM_001004339	ZYG11A	chr1	53308182	53360247	+	Bivalent	Bivalent	Bivalent	H3K4me3-only	H3K4me3-only	Bivalent	Bivalent	Bivalent	Bivalent	H3K4me3-only	Bivalent	Bivalent	Bivalent	H3K4me3-only	Unmarked	Unmarked	H3K4me3-only	Unmarked	H3K4me3-only	Unmarked
NM_001004341	ETV3L	chr1	157061834	157069600	-	Unmarked	Unmarked	Unmarked	H3K27me3-only	H3K27me3-only	Unmarked	Unmarked	Unmarked	Unmarked	Unmarked	Unmarked	Unmarked	Unmarked	Unmarked	Unmarked	Unmarked	Unmarked	Unmarked	Unmarked	Unmarked
NM_001004342	TRIM67	chr1	231298673	231357314	+	Bivalent	Bivalent	Bivalent	Bivalent	Bivalent	Bivalent	H3K27me3-only	H3K27me3-only	Bivalent	Bivalent	H3K27me3-only	Bivalent	Bivalent	H3K27me3-only	H3K27me3-only	H3K4me3-only	Unmarked	Unmarked	Unmarked	H3K4me3-only
NM_001004343	MAP1LC3C	chr1	242158791	242162385	-	H3K4me3-only	H3K4me3-only	H3K4me3-only	H3K4me3-only	Unmarked	H3K4me3-only	H3K4me3-only	H3K4me3-only	H3K4me3-only	Unmarked	Unmarked	Unmarked	Unmarked	Unmarked	Unmarked	Unmarked	Unmarked	Unmarked	Unmarked	Unmarked
NM_001004351	SPDYE3	chr7	99905324	99919819	+	Unmarked	Unmarked	Unmarked	Unmarked	Unmarked	Unmarked	Unmarked	Unmarked	Unmarked	Unmarked	Unmarked	Unmarked	Unmarked	Unmarked	Unmarked	Unmarked	Unmarked	Unmarked	Unmarked	Unmarked
NM_001004352	LOC100506422	chr9	26066672	26118406	+	Unmarked	Unmarked	Unmarked	Unmarked	Unmarked	Unmarked	Unmarked	Unmarked	Unmarked	Unmarked	Unmarked	Unmarked	Unmarked	Unmarked	Unmarked	Unmarked	Unmarked	Unmarked	Unmarked	Unmarked
NM_001004354	NRARP	chr9	140194082	140196703	-	Bivalent	Bivalent	Bivalent	Bivalent	Bivalent	Bivalent	H3K4me3-only	H3K4me3-only	Bivalent	Bivalent	H3K4me3-only	H3K4me3-only	H3K4me3-only	H3K4me3-only	H3K4me3-only	H3K4me3-only	H3K4me3-only	H3K4me3-only	H3K4me3-only	H3K4me3-only
NM_001004356	FGFRL1	chr4	1005609	1020686	+	Bivalent	Bivalent	Bivalent	H3K4me3-only	H3K4me3-only	H3K4me3-only	H3K4me3-only	H3K4me3-only	H3K4me3-only	Bivalent	H3K4me3-only	H3K4me3-only	H3K4me3-only	Unmarked	Unmarked	H3K4me3-only	H3K4me3-only	H3K4me3-only	Unmarked	H3K4me3-only
NM_001004358	FGFRL1	chr4	1005759	1020686	+	Bivalent	Bivalent	Bivalent	H3K4me3-only	Bivalent	H3K4me3-only	H3K4me3-only	H3K4me3-only	H3K4me3-only	H3K4me3-only	H3K4me3-only	H3K4me3-only	H3K4me3-only	H3K4me3-only	Unmarked	H3K4me3-only	H3K4me3-only	H3K4me3-only	H3K4me3-only	H3K4me3-only
NM_001004360	DPP10	chr2	115919683	116602326	+	Bivalent	Bivalent	Bivalent	H3K27me3-only	H3K27me3-only	Bivalent	Bivalent	Bivalent	H3K27me3-only	Bivalent	H3K27me3-only	H3K27me3-only	Bivalent	Unmarked	Unmarked	H3K4me3-only	H3K4me3-only	Unmarked	H3K4me3-only	H3K4me3-only
NM_001004419	CLEC2D	chr12	9822303	9852151	+	Unmarked	Unmarked	Unmarked	Unmarked	Unmarked	Unmarked	Unmarked	Unmarked	Unmarked	Unmarked	H3K4me3-only	Unmarked	Unmarked	Unmarked	Unmarked	Unmarked	Unmarked	Unmarked	Unmarked	Unmarked
NM_001004431	METRNL	chr17	81037566	81052591	+	Bivalent	Bivalent	Bivalent	Bivalent	Bivalent	Bivalent	Bivalent	Bivalent	Bivalent	Bivalent	Bivalent	Bivalent	H3K4me3-only	Bivalent	Unmarked	H3K4me3-only	H3K4me3-only	H3K4me3-only	H3K4me3-only	H3K4me3-only
NM_001004432	LINGO4	chr1	151772764	151777882	-	Unmarked	Unmarked	H3K27me3-only	H3K27me3-only	H3K27me3-only	Unmarked	H3K27me3-only	H3K27me3-only	H3K27me3-only	H3K27me3-only	Unmarked	H3K27me3-only	Unmarked	H3K27me3-only	H3K27me3-only	Unmarked	Unmarked	Unmarked	Unmarked	Unmarked
NM_001004439	ITGA11	chr15	68594041	68724492	-	Bivalent	Bivalent	Bivalent	Bivalent	Bivalent	Bivalent	Bivalent	Bivalent	Bivalent	Bivalent	H3K27me3-only	Bivalent	H3K4me3-only	Bivalent	Bivalent	H3K4me3-only	H3K4me3-only	H3K4me3-only	H3K4me3-only	H3K4me3-only
NM_001004440	FAM19A3	chr1	113263188	113269856	+	H3K27me3-only	H3K27me3-only	H3K27me3-only	H3K27me3-only	H3K4me3-only	Unmarked	H3K27me3-only	H3K27me3-only	Unmarked	Unmarked	Unmarked	Unmarked	Unmarked	Unmarked	Unmarked	Unmarked	Unmarked	Unmarked	Unmarked	Unmarked
NM_001004441	ANKRD34B	chr5	79852573	79866304	-	Bivalent	Bivalent	Bivalent	Bivalent	Bivalent	Bivalent	Bivalent	H3K27me3-only	Bivalent	Bivalent	Bivalent	Bivalent	Bivalent	Bivalent	Bivalent	H3K4me3-only	H3K4me3-only	Unmarked	H3K4me3-only	H3K4me3-only
NM_001004450	OR1B1	chr9	125390857	125391814	-	Unmarked	Unmarked	Unmarked	Unmarked	Unmarked	Unmarked	Unmarked	Unmarked	Unmarked	Unmarked	Unmarked	Unmarked	Unmarked	Unmarked	Unmarked	Unmarked	Unmarked	Unmarked	Unmarked	Unmarked
NM_001004451	OR1J1	chr9	125239236	125240205	-	Unmarked	Unmarked	Unmarked	Unmarked	Unmarked	Unmarked	Unmarked	Unmarked	Unmarked	Unmarked	Unmarked	Unmarked	Unmarked	Unmarked	Unmarked	Unmarked	Unmarked	Unmarked	Unmarked	Unmarked
NM_001004452	OR1J4	chr9	125281419	125282361	+	Unmarked	Unmarked	Unmarked	Unmarked	Unmarked	Unmarked	Unmarked	Unmarked	Unmarked	Unmarked	Unmarked	Unmarked	Unmarked	Unmarked	Unmarked	Unmarked	Unmarked	Unmarked	Unmarked	Unmarked
NM_001004453	OR1L6	chr9	125512126	125513062	+	Unmarked	Unmarked	Unmarked	Unmarked	Unmarked	Unmarked	Unmarked	Unmarked	Unmarked	Unmarked	Unmarked	Unmarked	Unmarked	Unmarked	Unmarked	Unmarked	Unmarked	Unmarked	Unmarked	Unmarked
NM_001004454	OR1L8	chr9	125329826	125330756	-	Unmarked	Unmarked	Unmarked	Unmarked	Unmarked	Unmarked	Unmarked	Unmarked	Unmarked	Unmarked	Unmarked	Unmarked	Unmarked	Unmarked	Unmarked	Unmarked	Unmarked	Unmarked	Unmarked	Unmarked
NM_001004456	OR1M1	chr19	9203920	9204862	+	Unmarked	Unmarked	Unmarked	Unmarked	Unmarked	Unmarked	Unmarked	Unmarked	Unmarked	Unmarked	Unmarked	Unmarked	H3K27me3-only	Unmarked	Unmarked	Unmarked	Unmarked	Unmarked	Unmarked	Unmarked
NM_001004457	OR1N2	chr9	125315448	125316441	+	Unmarked	Unmarked	H3K27me3-only	Unmarked	Unmarked	Unmarked	Unmarked	Unmarked	Unmarked	Unmarked	Unmarked	Unmarked	Unmarked	Unmarked	Unmarked	Unmarked	Unmarked	Unmarked	Unmarked	Unmarked
NM_001004458	OR1S1	chr11	57982216	57983194	+	Unmarked	Unmarked	Unmarked	Unmarked	Unmarked	Unmarked	Unmarked	Unmarked	Unmarked	Unmarked	Unmarked	Unmarked	Unmarked	Unmarked	Unmarked	Unmarked	Unmarked	Unmarked	Unmarked	Unmarked
NM_001004459	OR1S2	chr11	57970675	57971653	-	Unmarked	Unmarked	Unmarked	Unmarked	Unmarked	Unmarked	Unmarked	Unmarked	Unmarked	Unmarked	Unmarked	Unmarked	Unmarked	Unmarked	Unmarked	Unmarked	Unmarked	Unmarked	Unmarked	Unmarked
NM_001004460	OR10A2	chr11	6890985	6891897	+	Unmarked	Unmarked	Unmarked	Unmarked	Unmarked	Unmarked	Unmarked	Unmarked	Unmarked	Unmarked	Unmarked	Unmarked	Unmarked	Unmarked	Unmarked	Unmarked	Unmarked	Unmarked	Unmarked	Unmarked
NM_001004461	OR10A6	chr11	7949264	7950209	-	Unmarked	Unmarked	Unmarked	Unmarked	Unmarked	Unmarked	Unmarked	Unmarked	Unmarked	Unmarked	Unmarked	Unmarked	Unmarked	Unmarked	Unmarked	Unmarked	Unmarked	Unmarked	Unmarked	Unmarked
NM_001004462	OR10G4	chr11	123886281	123887217	+	Unmarked	Unmarked	Unmarked	Unmarked	Unmarked	Unmarked	Unmarked	Unmarked	Unmarked	Unmarked	Unmarked	Unmarked	Unmarked	Unmarked	Unmarked	Unmarked	Unmarked	Unmarked	Unmarked	Unmarked
NM_001004463	OR10G7	chr11	123908772	123909708	-	Unmarked	Unmarked	Unmarked	Unmarked	Unmarked	Unmarked	Unmarked	Unmarked	Unmarked	Unmarked	Unmarked	Unmarked	Unmarked	Unmarked	Unmarked	Unmarked	Unmarked	Unmarked	Unmarked	Unmarked
NM_001004464	OR10G8	chr11	123900329	123901265	+	Unmarked	Unmarked	Unmarked	Unmarked	Unmarked	Unmarked	Unmarked	Unmarked	Unmarked	Unmarked	Unmarked	Unmarked	Unmarked	Unmarked	Unmarked	Unmarked	Unmarked	Unmarked	Unmarked	Unmarked
NM_001004465	OR10H4	chr19	16059817	16060768	+	Unmarked	Unmarked	Unmarked	Unmarked	Unmarked	Unmarked	Unmarked	Unmarked	Unmarked	Unmarked	Unmarked	Unmarked	Unmarked	Unmarked	Unmarked	Unmarked	Unmarked	Unmarked	Unmarked	Unmarked
NM_001004466	OR10H5	chr19	15904858	15905806	+	Unmarked	Unmarked	Unmarked	Unmarked	Unmarked	Unmarked	Unmarked	Unmarked	Unmarked	Unmarked	Unmarked	Unmarked	Unmarked	Unmarked	Unmarked	Unmarked	Unmarked	Unmarked	Unmarked	Unmarked
NM_001004467	OR10J3	chr1	159283459	159284449	-	Unmarked	Unmarked	Unmarked	Unmarked	Unmarked	Unmarked	Unmarked	Unmarked	Unmarked	Unmarked	Unmarked	Unmarked	Unmarked	Unmarked	Unmarked	Unmarked	Unmarked	Unmarked	Unmarked	Unmarked
NM_001004469	OR10J5	chr1	159504867	159505797	-	Unmarked	Unmarked	Unmarked	Unmarked	Unmarked	Unmarked	Unmarked	Unmarked	Unmarked	Unmarked	Unmarked	Unmarked	Unmarked	Unmarked	Unmarked	Unmarked	Unmarked	Unmarked	Unmarked	Unmarked
NM_001004470	ST8SIA6	chr10	17362675	17496254	-	Bivalent	Bivalent	Bivalent	H3K4me3-only	Bivalent	H3K4me3-only	H3K27me3-only	Bivalent	Bivalent	H3K4me3-only	H3K4me3-only	H3K4me3-only	H3K4me3-only	Bivalent	H3K4me3-only	H3K4me3-only	H3K4me3-only	H3K4me3-only	H3K4me3-only	H3K4me3-only
NM_001004471	OR10Q1	chr11	57995353	57996390	-	Unmarked	Unmarked	Unmarked	Unmarked	Unmarked	Unmarked	Unmarked	Unmarked	Unmarked	Unmarked	Unmarked	Unmarked	Unmarked	Unmarked	Unmarked	Unmarked	Unmarked	Unmarked	Unmarked	Unmarked
NM_001004472	OR10R2	chr1	158449667	158450675	+	Unmarked	Unmarked	Unmarked	Unmarked	Unmarked	Unmarked	Unmarked	Unmarked	Unmarked	Unmarked	Unmarked	Unmarked	Unmarked	Unmarked	Unmarked	Unmarked	Unmarked	Unmarked	Unmarked	Unmarked
NM_001004473	OR10K1	chr1	158435351	158436293	+	Unmarked	Unmarked	Unmarked	Unmarked	Unmarked	Unmarked	Unmarked	Unmarked	Unmarked	Unmarked	Unmarked	Unmarked	Unmarked	Unmarked	Unmarked	Unmarked	Unmarked	Unmarked	Unmarked	Unmarked
NM_001004474	OR10S1	chr11	123847402	123848398	-	Unmarked	Unmarked	Unmarked	Unmarked	Unmarked	Unmarked	Unmarked	Unmarked	Unmarked	Unmarked	Unmarked	Unmarked	Unmarked	Unmarked	Unmarked	Unmarked	Unmarked	Unmarked	Unmarked	Unmarked
NM_001004475	OR10T2	chr1	158368311	158369256	-	Unmarked	Unmarked	Unmarked	Unmarked	Unmarked	Unmarked	Unmarked	Unmarked	Unmarked	Unmarked	Unmarked	Unmarked	Unmarked	Unmarked	Unmarked	Unmarked	Unmarked	Unmarked	Unmarked	Unmarked
NM_001004476	OR10K2	chr1	158389717	158390656	-	Unmarked	Unmarked	Unmarked	Unmarked	Unmarked	Unmarked	Unmarked	Unmarked	Unmarked	Unmarked	Unmarked	Unmarked	Unmarked	Unmarked	Unmarked	Unmarked	Unmarked	Unmarked	Unmarked	Unmarked
NM_001004477	OR10X1	chr1	158548708	158549689	-	Unmarked	Unmarked	Unmarked	Unmarked	Unmarked	Unmarked	Unmarked	Unmarked	Unmarked	Unmarked	Unmarked	Unmarked	Unmarked	Unmarked	Unmarked	Unmarked	Unmarked	Unmarked	Unmarked	Unmarked
NM_001004478	OR10Z1	chr1	158576228	158577170	+	Unmarked	Unmarked	Unmarked	Unmarked	Unmarked	Unmarked	Unmarked	Unmarked	Unmarked	Unmarked	Unmarked	Unmarked	Unmarked	Unmarked	Unmarked	Unmarked	Unmarked	Unmarked	Unmarked	Unmarked
NM_001004479	OR11H4	chr14	20710950	20711925	+	Unmarked	Unmarked	Unmarked	Unmarked	Unmarked	Unmarked	Unmarked	Unmarked	Unmarked	Unmarked	Unmarked	Unmarked	Unmarked	Unmarked	Unmarked	Unmarked	Unmarked	Unmarked	Unmarked	Unmarked
NM_001004480	OR11H6	chr14	20691868	20692861	+	Unmarked	Unmarked	Unmarked	Unmarked	Unmarked	Unmarked	Unmarked	Unmarked	Unmarked	Unmarked	Unmarked	Unmarked	Unmarked	Unmarked	Unmarked	Unmarked	Unmarked	Unmarked	Unmarked	Unmarked
NM_001004481	OR13C2	chr9	107366951	107367908	-	Unmarked	Unmarked	Unmarked	Unmarked	Unmarked	Unmarked	Unmarked	Unmarked	Unmarked	Unmarked	Unmarked	Unmarked	Unmarked	Unmarked	Unmarked	Unmarked	Unmarked	Unmarked	Unmarked	Unmarked
NM_001004482	OR13C5	chr9	107360737	107361694	-	Unmarked	Unmarked	Unmarked	Unmarked	Unmarked	Unmarked	Unmarked	Unmarked	Unmarked	Unmarked	Unmarked	Unmarked	Unmarked	Unmarked	Unmarked	Unmarked	Unmarked	Unmarked	Unmarked	Unmarked
NM_001004483	OR13C8	chr9	107331448	107332411	+	Unmarked	Unmarked	Unmarked	Unmarked	Unmarked	Unmarked	Unmarked	Unmarked	Unmarked	Unmarked	Unmarked	Unmarked	Unmarked	Unmarked	Unmarked	Unmarked	Unmarked	Unmarked	Unmarked	Unmarked
NM_001004484	OR13D1	chr9	107456702	107457743	+	Unmarked	Unmarked	Unmarked	Unmarked	Unmarked	Unmarked	Unmarked	Unmarked	Unmarked	Unmarked	Unmarked	Unmarked	Unmarked	Unmarked	Unmarked	Unmarked	Unmarked	Unmarked	Unmarked	Unmarked
NM_001004485	OR13F1	chr9	107266543	107267503	+	Unmarked	Unmarked	Unmarked	Unmarked	Unmarked	Unmarked	Unmarked	Unmarked	Unmarked	Unmarked	Unmarked	Unmarked	Unmarked	Unmarked	Unmarked	Unmarked	Unmarked	Unmarked	Unmarked	Unmarked
NM_001004486	OR13H1	chrX	130678047	130678974	+	Unmarked	Unmarked	Unmarked	Unmarked	Unmarked	H3K27me3-only	Unmarked	Unmarked	Unmarked	Unmarked	Unmarked	Unmarked	Unmarked	Unmarked	Unmarked	Unmarked	Unmarked	Unmarked	Unmarked	Unmarked
NM_001004487	OR13J1	chr9	35869459	35870398	-	Unmarked	Unmarked	Unmarked	H3K27me3-only	H3K27me3-only	H3K27me3-only	Unmarked	Unmarked	Unmarked	Unmarked	Unmarked	Unmarked	Unmarked	Unmarked	Unmarked	Unmarked	Unmarked	Unmarked	Unmarked	Unmarked
NM_001004488	OR2A25	chr7	143771312	143772245	+	Unmarked	Unmarked	Unmarked	Unmarked	Unmarked	Unmarked	Unmarked	Unmarked	Unmarked	Unmarked	Unmarked	Unmarked	Unmarked	Unmarked	Unmarked	Unmarked	Unmarked	Unmarked	Unmarked	Unmarked
NM_001004489	OR2AG1	chr11	6806247	6807245	+	Unmarked	Unmarked	Unmarked	Unmarked	Unmarked	Unmarked	Unmarked	Unmarked	Unmarked	Unmarked	Unmarked	Unmarked	Unmarked	Unmarked	Unmarked	Unmarked	Unmarked	Unmarked	Unmarked	Unmarked
NM_001004490	OR2AG2	chr11	6789237	6790188	-	Unmarked	Unmarked	Unmarked	Unmarked	Unmarked	Unmarked	Unmarked	Unmarked	Unmarked	Unmarked	Unmarked	Unmarked	Unmarked	Unmarked	Unmarked	Unmarked	Unmarked	Unmarked	Unmarked	Unmarked
NM_001004491	OR2AK2	chr1	248128633	248129641	+	Unmarked	Unmarked	Unmarked	Unmarked	Unmarked	Unmarked	Unmarked	Unmarked	Unmarked	Unmarked	Unmarked	Unmarked	Unmarked	Unmarked	Unmarked	Unmarked	Unmarked	Unmarked	Unmarked	Unmarked
NM_001004492	OR2B11	chr1	247614330	247615284	-	Unmarked	Unmarked	H3K27me3-only	Unmarked	Unmarked	Unmarked	Unmarked	Unmarked	Unmarked	Unmarked	Unmarked	Unmarked	Unmarked	Unmarked	Unmarked	Unmarked	Unmarked	Unmarked	Unmarked	Unmarked
NM_001004684	OR2D3	chr11	6942232	6943225	+	Unmarked	Unmarked	Unmarked	Unmarked	Unmarked	Unmarked	Unmarked	Unmarked	Unmarked	Unmarked	Unmarked	Unmarked	Unmarked	Unmarked	Unmarked	Unmarked	Unmarked	Unmarked	Unmarked	Unmarked
NM_001004685	OR2F2	chr7	143632325	143633279	+	Unmarked	Unmarked	Unmarked	Unmarked	Unmarked	Unmarked	Unmarked	Unmarked	Unmarked	Unmarked	Unmarked	Unmarked	Unmarked	Unmarked	Unmarked	Unmarked	Unmarked	Unmarked	Unmarked	Unmarked
NM_001004686	OR2L2	chr1	248201473	248202607	+	Unmarked	Unmarked	Unmarked	Unmarked	Unmarked	Unmarked	Unmarked	Unmarked	Unmarked	Unmarked	Unmarked	Unmarked	Unmarked	Unmarked	Unmarked	Unmarked	Unmarked	Unmarked	Unmarked	Unmarked
NM_001004687	OR2L3	chr1	248223983	248224922	+	Unmarked	Unmarked	Unmarked	Unmarked	Unmarked	Unmarked	Unmarked	Unmarked	Unmarked	Unmarked	Unmarked	Unmarked	Unmarked	Unmarked	Unmarked	Unmarked	Unmarked	Unmarked	Unmarked	Unmarked
NM_001004688	OR2M2	chr1	248343287	248344331	+	Unmarked	Unmarked	Unmarked	Unmarked	Unmarked	Unmarked	Unmarked	Unmarked	Unmarked	Unmarked	Unmarked	Unmarked	Unmarked	Unmarked	Unmarked	Unmarked	Unmarked	Unmarked	Unmarked	Unmarked
NM_001004689	OR2M3	chr1	248366369	248367308	+	Unmarked	Unmarked	Unmarked	Unmarked	Unmarked	Unmarked	Unmarked	Unmarked	Unmarked	Unmarked	Unmarked	Unmarked	Unmarked	Unmarked	Unmarked	Unmarked	Unmarked	Unmarked	Unmarked	Unmarked
NM_001004690	OR2M5	chr1	248308449	248309388	+	Unmarked	Unmarked	Unmarked	Unmarked	Unmarked	Unmarked	Unmarked	Unmarked	Unmarked	Unmarked	Unmarked	Unmarked	Unmarked	Unmarked	Unmarked	Unmarked	Unmarked	Unmarked	Unmarked	Unmarked
NM_001004691	OR2M7	chr1	248486931	248487870	-	Unmarked	Unmarked	Unmarked	Unmarked	Unmarked	Unmarked	Unmarked	Unmarked	Unmarked	Unmarked	Unmarked	Unmarked	Unmarked	Unmarked	Unmarked	Unmarked	Unmarked	Unmarked	Unmarked	Unmarked
NM_001004692	OR2T12	chr1	248457917	248458880	-	Unmarked	Unmarked	Unmarked	Unmarked	Unmarked	Unmarked	Unmarked	Unmarked	Unmarked	Unmarked	Unmarked	Unmarked	Unmarked	Unmarked	Unmarked	Unmarked	Unmarked	Unmarked	Unmarked	Unmarked
NM_001004693	OR2T10	chr1	248756130	248757069	-	Unmarked	Unmarked	Unmarked	Unmarked	Unmarked	Unmarked	Unmarked	Unmarked	Unmarked	Unmarked	Unmarked	Unmarked	Unmarked	Unmarked	Unmarked	Unmarked	Unmarked	Unmarked	Unmarked	Unmarked
NM_001004694	OR2T29	chr1	248721844	248722792	-	Unmarked	Unmarked	Unmarked	Unmarked	Unmarked	Unmarked	Unmarked	Unmarked	Unmarked	Unmarked	Unmarked	Unmarked	Unmarked	Unmarked	Unmarked	Unmarked	Unmarked	Unmarked	Unmarked	Unmarked
NM_001004695	OR2T33	chr1	248436153	248437116	-	Unmarked	Unmarked	Unmarked	Unmarked	Unmarked	Unmarked	Unmarked	Unmarked	Unmarked	Unmarked	Unmarked	Unmarked	Unmarked	Unmarked	Unmarked	Unmarked	Unmarked	Unmarked	Unmarked	Unmarked
NM_001004696	OR2T4	chr1	248524882	248525929	+	Unmarked	Unmarked	Unmarked	Unmarked	Unmarked	Unmarked	Unmarked	Unmarked	Unmarked	Unmarked	Unmarked	Unmarked	Unmarked	Unmarked	Unmarked	Unmarked	Unmarked	Unmarked	Unmarked	Unmarked
NM_001004697	OR2T5	chr1	248651889	248652837	+	Unmarked	Unmarked	Unmarked	Unmarked	Unmarked	Unmarked	Unmarked	Unmarked	Unmarked	Unmarked	Unmarked	Unmarked	Unmarked	Unmarked	Unmarked	Unmarked	Unmarked	Unmarked	Unmarked	Unmarked
NM_001004698	OR2W5	chr1	247654369	247655711	+	Unmarked	Unmarked	Unmarked	Unmarked	Unmarked	Unmarked	Unmarked	Unmarked	Unmarked	Unmarked	Unmarked	Unmarked	Unmarked	Unmarked	Unmarked	Unmarked	Unmarked	Unmarked	Unmarked	Unmarked
NM_001004699	OR2Z1	chr19	8841390	8842335	+	Unmarked	Unmarked	Unmarked	Unmarked	Unmarked	Unmarked	Unmarked	Unmarked	Unmarked	Unmarked	Unmarked	Unmarked	H3K27me3-only	Unmarked	Unmarked	Unmarked	Unmarked	Unmarked	Unmarked	Unmarked
NM_001004700	OR4C11	chr11	55370829	55371874	-	Unmarked	Unmarked	Unmarked	Unmarked	Unmarked	Unmarked	Unmarked	Unmarked	Unmarked	Unmarked	Unmarked	Unmarked	Unmarked	Unmarked	Unmarked	Unmarked	Unmarked	Unmarked	Unmarked	Unmarked
NM_001004701	OR4C16	chr11	55339603	55340536	+	Unmarked	Unmarked	Unmarked	Unmarked	Unmarked	Unmarked	Unmarked	Unmarked	Unmarked	Unmarked	Unmarked	Unmarked	Unmarked	Unmarked	Unmarked	Unmarked	Unmarked	Unmarked	Unmarked	Unmarked
NM_001004702	OR4C3	chr11	48346492	48347482	+	Unmarked	Unmarked	Unmarked	Unmarked	Unmarked	Unmarked	Unmarked	Unmarked	Unmarked	Unmarked	Unmarked	Unmarked	Unmarked	Unmarked	Unmarked	Unmarked	Unmarked	Unmarked	Unmarked	Unmarked
NM_001004703	OR4C46	chr11	51515281	51516211	+	Unmarked	Unmarked	Unmarked	Unmarked	Unmarked	Unmarked	Unmarked	Unmarked	Unmarked	Unmarked	Unmarked	Unmarked	Unmarked	Unmarked	Unmarked	Unmarked	Unmarked	Unmarked	Unmarked	Unmarked
NM_001004704	OR4C6	chr11	55432642	55433572	+	Unmarked	Unmarked	Unmarked	Unmarked	Unmarked	Unmarked	Unmarked	Unmarked	Unmarked	Unmarked	Unmarked	Unmarked	Unmarked	Unmarked	Unmarked	Unmarked	Unmarked	Unmarked	Unmarked	Unmarked
NM_001004705	OR4D10	chr11	59244902	59245838	+	Unmarked	Unmarked	Unmarked	Unmarked	Unmarked	Unmarked	Unmarked	Unmarked	Unmarked	Unmarked	Unmarked	Unmarked	Unmarked	Unmarked	Unmarked	Unmarked	Unmarked	Unmarked	Unmarked	Unmarked
NM_001004706	OR4D11	chr11	59271048	59271984	+	Unmarked	Unmarked	Unmarked	Unmarked	Unmarked	Unmarked	Unmarked	Unmarked	Unmarked	Unmarked	Unmarked	Unmarked	Unmarked	Unmarked	Unmarked	Unmarked	Unmarked	Unmarked	Unmarked	Unmarked
NM_001004707	OR4D2	chr17	56247016	56247940	+	Unmarked	H3K27me3-only	H3K27me3-only	Unmarked	Unmarked	Unmarked	H3K27me3-only	Unmarked	Unmarked	H3K27me3-only	Unmarked	Unmarked	H3K27me3-only	Unmarked	Unmarked	Unmarked	Unmarked	Unmarked	Unmarked	Unmarked
NM_001004708	OR4D6	chr11	59224433	59225378	+	Unmarked	Unmarked	Unmarked	Unmarked	Unmarked	Unmarked	Unmarked	Unmarked	Unmarked	Unmarked	Unmarked	Unmarked	Unmarked	Unmarked	Unmarked	Unmarked	Unmarked	Unmarked	Unmarked	Unmarked
NM_001004711	OR4D9	chr11	59282385	59283330	+	Unmarked	Unmarked	Unmarked	Unmarked	Unmarked	Unmarked	Unmarked	Unmarked	Unmarked	Unmarked	Unmarked	Unmarked	Unmarked	Unmarked	Unmarked	Unmarked	Unmarked	Unmarked	Unmarked	Unmarked
NM_001004712	OR4K14	chr14	20482419	20483352	-	Unmarked	Unmarked	Unmarked	Unmarked	Unmarked	Unmarked	Unmarked	Unmarked	Unmarked	Unmarked	Unmarked	Unmarked	Unmarked	Unmarked	Unmarked	Unmarked	Unmarked	Unmarked	Unmarked	Unmarked
NM_001004713	OR1I1	chr19	15197876	15198944	+	Unmarked	Unmarked	Unmarked	Unmarked	Unmarked	Unmarked	Unmarked	Unmarked	Unmarked	H3K27me3-only	Unmarked	Unmarked	Unmarked	H3K27me3-only	Unmarked	Unmarked	Unmarked	Unmarked	Unmarked	Unmarked
NM_001004714	OR4K13	chr14	20502002	20502917	-	Unmarked	Unmarked	Unmarked	Unmarked	Unmarked	Unmarked	Unmarked	Unmarked	Unmarked	Unmarked	Unmarked	Unmarked	Unmarked	Unmarked	Unmarked	Unmarked	Unmarked	Unmarked	Unmarked	Unmarked
NM_001004715	OR4K17	chr14	20585565	20586597	+	Unmarked	Unmarked	Unmarked	Unmarked	Unmarked	Unmarked	Unmarked	Unmarked	Unmarked	Unmarked	Unmarked	Unmarked	Unmarked	Unmarked	Unmarked	Unmarked	Unmarked	Unmarked	Unmarked	Unmarked
NM_001004717	OR4L1	chr14	20528203	20529142	+	Unmarked	Unmarked	Unmarked	Unmarked	Unmarked	Unmarked	Unmarked	Unmarked	Unmarked	Unmarked	Unmarked	Unmarked	Unmarked	Unmarked	Unmarked	Unmarked	Unmarked	Unmarked	Unmarked	Unmarked
NM_001004719	OR4M2	chr15	22368477	22369561	+	Unmarked	Unmarked	Unmarked	Unmarked	Unmarked	Unmarked	Unmarked	Unmarked	Unmarked	Unmarked	Unmarked	Unmarked	Unmarked	Unmarked	Unmarked	Unmarked	Unmarked	Unmarked	Unmarked	Unmarked
NM_001004720	NCK2	chr2	106468203	106510730	+	Unmarked	Unmarked	Unmarked	Unmarked	Unmarked	Unmarked	Unmarked	Unmarked	Unmarked	Unmarked	Unmarked	Unmarked	Unmarked	Unmarked	Unmarked	Unmarked	Unmarked	Unmarked	Unmarked	Unmarked
NM_001004723	OR4N2	chr14	20295607	20296531	+	Unmarked	Unmarked	Unmarked	Unmarked	Unmarked	Unmarked	Unmarked	Unmarked	Unmarked	Unmarked	Unmarked	Unmarked	Unmarked	Unmarked	Unmarked	Unmarked	Unmarked	Unmarked	Unmarked	Unmarked
NM_001004724	OR4N5	chr14	20611894	20612821	+	Unmarked	Unmarked	Unmarked	Unmarked	Unmarked	Unmarked	Unmarked	Unmarked	Unmarked	Unmarked	Unmarked	Unmarked	Unmarked	Unmarked	Unmarked	Unmarked	Unmarked	Unmarked	Unmarked	Unmarked
NM_001004725	OR4S1	chr11	48327774	48328704	+	Unmarked	Unmarked	Unmarked	Unmarked	Unmarked	Unmarked	Unmarked	Unmarked	Unmarked	Unmarked	Unmarked	Unmarked	Unmarked	Unmarked	Unmarked	Unmarked	Unmarked	Unmarked	Unmarked	Unmarked
NM_001004726	OR4X1	chr11	48285412	48286330	+	Unmarked	Unmarked	Unmarked	Unmarked	Unmarked	Unmarked	Unmarked	Unmarked	Unmarked	Unmarked	Unmarked	Unmarked	Unmarked	Unmarked	Unmarked	Unmarked	Unmarked	Unmarked	Unmarked	Unmarked
NM_001004727	OR4X2	chr11	48266655	48267567	+	Unmarked	Unmarked	Unmarked	Unmarked	Unmarked	Unmarked	Unmarked	Unmarked	Unmarked	Unmarked	Unmarked	Unmarked	Unmarked	Unmarked	Unmarked	Unmarked	Unmarked	Unmarked	Unmarked	Unmarked
NM_001004728	OR5A1	chr11	59210641	59211589	+	Unmarked	Unmarked	Unmarked	Unmarked	Unmarked	Unmarked	Unmarked	Unmarked	Unmarked	Unmarked	Unmarked	Unmarked	Unmarked	Unmarked	Unmarked	Unmarked	Unmarked	Unmarked	Unmarked	Unmarked
NM_001004729	OR5AN1	chr11	59131931	59132867	+	Unmarked	Unmarked	Unmarked	Unmarked	Unmarked	Unmarked	Unmarked	Unmarked	Unmarked	Unmarked	Unmarked	Unmarked	Unmarked	Unmarked	Unmarked	Unmarked	Unmarked	Unmarked	Unmarked	Unmarked
NM_001004730	OR5AR1	chr11	56431161	56432094	+	Unmarked	Unmarked	Unmarked	Unmarked	Unmarked	Unmarked	Unmarked	Unmarked	Unmarked	Unmarked	Unmarked	Unmarked	Unmarked	Unmarked	Unmarked	Unmarked	Unmarked	Unmarked	Unmarked	Unmarked
NM_001004731	OR5AU1	chr14	21623095	21624184	-	Unmarked	Unmarked	H3K27me3-only	H3K27me3-only	Unmarked	Unmarked	Unmarked	Unmarked	Unmarked	Unmarked	Unmarked	Unmarked	Unmarked	Unmarked	Unmarked	Unmarked	Unmarked	Unmarked	Unmarked	Unmarked
NM_001004733	OR5B12	chr11	58206592	58207646	-	Unmarked	Unmarked	Unmarked	Unmarked	Unmarked	Unmarked	Unmarked	Unmarked	Unmarked	Unmarked	Unmarked	Unmarked	Unmarked	Unmarked	Unmarked	Unmarked	Unmarked	Unmarked	Unmarked	Unmarked
NM_001004734	OR14I1	chr1	248844669	248845605	-	Unmarked	Unmarked	Unmarked	Unmarked	Unmarked	Unmarked	Unmarked	Unmarked	Unmarked	Unmarked	Unmarked	Unmarked	Unmarked	Unmarked	Unmarked	Unmarked	Unmarked	Unmarked	Unmarked	Unmarked
NM_001004735	OR5D14	chr11	55563031	55563976	+	Unmarked	Unmarked	Unmarked	Unmarked	Unmarked	Unmarked	Unmarked	Unmarked	Unmarked	Unmarked	Unmarked	Unmarked	Unmarked	Unmarked	Unmarked	Unmarked	Unmarked	Unmarked	Unmarked	Unmarked
NM_001004736	OR5K1	chr3	98188420	98189372	+	Unmarked	Unmarked	Unmarked	Unmarked	Unmarked	Unmarked	Unmarked	Unmarked	Unmarked	Unmarked	Unmarked	Unmarked	Unmarked	Unmarked	Unmarked	Unmarked	Unmarked	Unmarked	Unmarked	Unmarked
NM_001004737	OR5K2	chr3	98216524	98217475	+	Unmarked	Unmarked	Unmarked	Unmarked	Unmarked	Unmarked	Unmarked	Unmarked	Unmarked	Unmarked	Unmarked	Unmarked	Unmarked	Unmarked	Unmarked	Unmarked	Unmarked	Unmarked	Unmarked	Unmarked
NM_001004738	OR5L1	chr11	55578942	55579878	+	Unmarked	Unmarked	Unmarked	Unmarked	Unmarked	Unmarked	Unmarked	Unmarked	Unmarked	Unmarked	Unmarked	Unmarked	Unmarked	Unmarked	Unmarked	Unmarked	Unmarked	Unmarked	Unmarked	Unmarked
NM_001004739	OR5L2	chr11	55594694	55595630	+	Unmarked	Unmarked	Unmarked	Unmarked	Unmarked	Unmarked	Unmarked	Unmarked	Unmarked	Unmarked	Unmarked	Unmarked	Unmarked	Unmarked	Unmarked	Unmarked	Unmarked	Unmarked	Unmarked	Unmarked
NM_001004740	OR5M1	chr11	56380030	56380978	-	Unmarked	Unmarked	Unmarked	Unmarked	Unmarked	Unmarked	Unmarked	Unmarked	Unmarked	Unmarked	Unmarked	Unmarked	Unmarked	Unmarked	Unmarked	Unmarked	Unmarked	Unmarked	Unmarked	Unmarked
NM_001004741	OR5M10	chr11	56344249	56345197	-	Unmarked	Unmarked	Unmarked	Unmarked	Unmarked	Unmarked	Unmarked	Unmarked	Unmarked	Unmarked	Unmarked	Unmarked	Unmarked	Unmarked	Unmarked	Unmarked	Unmarked	Unmarked	Unmarked	Unmarked
NM_001004742	OR5M3	chr11	56236963	56238014	-	Unmarked	Unmarked	Unmarked	Unmarked	Unmarked	Unmarked	Unmarked	Unmarked	Unmarked	Unmarked	Unmarked	Unmarked	Unmarked	Unmarked	Unmarked	Unmarked	Unmarked	Unmarked	Unmarked	Unmarked
NM_001004743	OR5M9	chr11	56229944	56230877	-	Unmarked	Unmarked	Unmarked	Unmarked	Unmarked	Unmarked	Unmarked	Unmarked	Unmarked	Unmarked	Unmarked	Unmarked	Unmarked	Unmarked	Unmarked	Unmarked	Unmarked	Unmarked	Unmarked	Unmarked
NM_001004744	OR5R1	chr11	56184733	56185708	-	Unmarked	Unmarked	Unmarked	Unmarked	Unmarked	Unmarked	Unmarked	Unmarked	Unmarked	Unmarked	Unmarked	Unmarked	Unmarked	Unmarked	Unmarked	Unmarked	Unmarked	Unmarked	Unmarked	Unmarked
NM_001004745	OR5T1	chr11	56043114	56044095	+	Unmarked	Unmarked	Unmarked	Unmarked	Unmarked	Unmarked	Unmarked	Unmarked	Unmarked	Unmarked	Unmarked	Unmarked	Unmarked	Unmarked	Unmarked	Unmarked	Unmarked	Unmarked	Unmarked	Unmarked
NM_001004746	OR5T2	chr11	55999581	56000661	-	Unmarked	Unmarked	Unmarked	Unmarked	Unmarked	Unmarked	Unmarked	Unmarked	Unmarked	Unmarked	Unmarked	Unmarked	Unmarked	Unmarked	Unmarked	Unmarked	Unmarked	Unmarked	Unmarked	Unmarked
NM_001004747	OR5T3	chr11	56019675	56020698	+	Unmarked	Unmarked	Unmarked	Unmarked	Unmarked	Unmarked	Unmarked	Unmarked	Unmarked	Unmarked	Unmarked	Unmarked	Unmarked	Unmarked	Unmarked	Unmarked	Unmarked	Unmarked	Unmarked	Unmarked
NM_001004748	OR51A2	chr11	4976001	4976943	-	Unmarked	Unmarked	Unmarked	Unmarked	Unmarked	Unmarked	Unmarked	Unmarked	Unmarked	Unmarked	Unmarked	Unmarked	Unmarked	Unmarked	Unmarked	Unmarked	Unmarked	Unmarked	Unmarked	Unmarked
NM_001004749	OR51A7	chr11	4928599	4929538	+	Unmarked	Unmarked	Unmarked	Unmarked	Unmarked	Unmarked	Unmarked	Unmarked	Unmarked	Unmarked	Unmarked	Unmarked	Unmarked	Unmarked	Unmarked	Unmarked	Unmarked	Unmarked	Unmarked	Unmarked
NM_001004750	OR51B6	chr11	5372737	5373676	+	Unmarked	Unmarked	Unmarked	Unmarked	Unmarked	Unmarked	Unmarked	Unmarked	Unmarked	Unmarked	Unmarked	Unmarked	Unmarked	Unmarked	Unmarked	Unmarked	Unmarked	Unmarked	Unmarked	Unmarked
NM_001004751	OR51D1	chr11	4660944	4662068	+	Unmarked	Unmarked	Unmarked	H3K27me3-only	Unmarked	Unmarked	Unmarked	Unmarked	Unmarked	Unmarked	Unmarked	Unmarked	Unmarked	H3K27me3-only	Unmarked	Unmarked	Unmarked	Unmarked	Unmarked	Unmarked
NM_001004752	OR51F1	chr11	4790208	4791147	-	Unmarked	Unmarked	Unmarked	Unmarked	Unmarked	Unmarked	Unmarked	Unmarked	Unmarked	Unmarked	Unmarked	Unmarked	Unmarked	Unmarked	Unmarked	Unmarked	Unmarked	Unmarked	Unmarked	Unmarked
NM_001004753	OR51F2	chr11	4842615	4843644	+	Unmarked	Unmarked	Unmarked	Unmarked	Unmarked	Unmarked	Unmarked	Unmarked	Unmarked	Unmarked	Unmarked	Unmarked	Unmarked	Unmarked	Unmarked	Unmarked	Unmarked	Unmarked	Unmarked	Unmarked
NM_001004754	OR51I2	chr11	5474637	5475707	+	Unmarked	Unmarked	Unmarked	Unmarked	Unmarked	Unmarked	Unmarked	Unmarked	Unmarked	H3K27me3-only	Unmarked	Unmarked	Unmarked	Unmarked	Unmarked	Unmarked	Unmarked	Unmarked	Unmarked	Unmarked
NM_001004755	OR51L1	chr11	5020212	5021160	+	Unmarked	Unmarked	Unmarked	Unmarked	Unmarked	Unmarked	Unmarked	Unmarked	Unmarked	Unmarked	Unmarked	Unmarked	Unmarked	Unmarked	Unmarked	Unmarked	Unmarked	Unmarked	Unmarked	Unmarked
NM_001004756	OR51M1	chr11	5410606	5411664	+	Unmarked	Unmarked	Unmarked	Unmarked	Unmarked	Unmarked	Unmarked	Unmarked	Unmarked	Unmarked	Unmarked	Unmarked	Unmarked	Unmarked	Unmarked	Unmarked	Unmarked	Unmarked	Unmarked	Unmarked
NM_001004757	OR51Q1	chr11	5443340	5444436	+	Unmarked	Unmarked	Unmarked	Unmarked	Unmarked	Unmarked	Unmarked	Unmarked	Unmarked	Unmarked	Unmarked	Unmarked	Unmarked	Unmarked	Unmarked	Unmarked	Unmarked	Unmarked	Unmarked	Unmarked
NM_001004758	OR51S1	chr11	4869466	4870438	-	Unmarked	Unmarked	Unmarked	Unmarked	Unmarked	Unmarked	Unmarked	Unmarked	Unmarked	Unmarked	Unmarked	Unmarked	Unmarked	Unmarked	Unmarked	Unmarked	Unmarked	Unmarked	Unmarked	Unmarked
NM_001004759	OR51T1	chr11	4903048	4904113	+	Unmarked	Unmarked	Unmarked	Unmarked	Unmarked	Unmarked	Unmarked	Unmarked	Unmarked	Unmarked	Unmarked	H3K27me3-only	H3K27me3-only	Unmarked	Unmarked	Unmarked	Unmarked	Unmarked	Unmarked	Unmarked
NM_001004760	OR51V1	chr11	5220964	5221930	-	Unmarked	Unmarked	Unmarked	Unmarked	Unmarked	Unmarked	Unmarked	Unmarked	Unmarked	Unmarked	Unmarked	Unmarked	Unmarked	Unmarked	Unmarked	Unmarked	Unmarked	Unmarked	Unmarked	Unmarked
NM_001005	RPS3	chr11	75110534	75117957	+	H3K4me3-only	H3K4me3-only	H3K4me3-only	H3K4me3-only	H3K4me3-only	H3K4me3-only	H3K4me3-only	H3K4me3-only	H3K4me3-only	H3K4me3-only	H3K4me3-only	H3K4me3-only	H3K4me3-only	H3K4me3-only	H3K4me3-only	H3K4me3-only	H3K4me3-only	H3K4me3-only	H3K4me3-only	H3K4me3-only
NM_001005160	OR52A5	chr11	5152921	5153872	-	Unmarked	Unmarked	Unmarked	Unmarked	Unmarked	Unmarked	Unmarked	Unmarked	Unmarked	Unmarked	Unmarked	Unmarked	Unmarked	Unmarked	Unmarked	Unmarked	Unmarked	Unmarked	Unmarked	Unmarked
NM_001005161	OR52B4	chr11	4388492	4389616	-	Unmarked	Unmarked	Unmarked	Unmarked	Unmarked	Unmarked	Unmarked	Unmarked	Unmarked	Unmarked	Unmarked	Unmarked	Unmarked	Unmarked	Unmarked	Unmarked	Unmarked	Unmarked	Unmarked	Unmarked
NM_001005162	OR52B6	chr11	5602106	5603114	+	Unmarked	Unmarked	Unmarked	Unmarked	Unmarked	Unmarked	Unmarked	Unmarked	Unmarked	Unmarked	Unmarked	Unmarked	Unmarked	Unmarked	Unmarked	Unmarked	Unmarked	Unmarked	Unmarked	Unmarked
NM_001005163	OR52D1	chr11	5509914	5510978	+	Unmarked	Unmarked	Unmarked	Unmarked	Unmarked	Unmarked	Unmarked	Unmarked	Unmarked	Unmarked	Unmarked	Unmarked	Unmarked	Unmarked	Unmarked	Unmarked	Unmarked	Unmarked	Unmarked	Unmarked
NM_001005164	OR52E2	chr11	5079879	5080857	-	Unmarked	Unmarked	Unmarked	Unmarked	Unmarked	Unmarked	Unmarked	Unmarked	Unmarked	Unmarked	Unmarked	Unmarked	Unmarked	Unmarked	Unmarked	Unmarked	Unmarked	Unmarked	Unmarked	Unmarked
NM_001005165	OR52E4	chr11	5905522	5906461	+	Unmarked	Unmarked	Unmarked	Unmarked	Unmarked	Unmarked	Unmarked	Unmarked	Unmarked	Unmarked	Unmarked	Unmarked	Unmarked	Unmarked	Unmarked	Unmarked	Unmarked	Unmarked	Unmarked	Unmarked
NM_001005167	OR52E6	chr11	5862185	5863127	-	Unmarked	Unmarked	Unmarked	Unmarked	Unmarked	Unmarked	Unmarked	Unmarked	Unmarked	Unmarked	Unmarked	Unmarked	Unmarked	Unmarked	Unmarked	Unmarked	Unmarked	Unmarked	Unmarked	Unmarked
NM_001005168	OR52E8	chr11	5877978	5878932	-	Unmarked	Unmarked	Unmarked	Unmarked	Unmarked	Unmarked	Unmarked	Unmarked	Unmarked	Unmarked	Unmarked	Unmarked	Unmarked	Unmarked	Unmarked	Unmarked	Unmarked	Unmarked	Unmarked	Unmarked
NM_001005169	OR52I1	chr11	4615268	4616243	+	Unmarked	Unmarked	Unmarked	Unmarked	Unmarked	Unmarked	Unmarked	Unmarked	Unmarked	Unmarked	Unmarked	Unmarked	Unmarked	Unmarked	Unmarked	Unmarked	Unmarked	Unmarked	Unmarked	Unmarked
NM_001005170	OR52I2	chr11	4608020	4609135	+	Unmarked	Unmarked	Unmarked	Unmarked	Unmarked	Unmarked	Unmarked	Unmarked	Unmarked	Unmarked	Unmarked	Unmarked	Unmarked	Unmarked	Unmarked	Unmarked	Unmarked	Unmarked	Unmarked	Unmarked
NM_001005171	OR52K1	chr11	4510108	4511138	+	Unmarked	Unmarked	Unmarked	Unmarked	Unmarked	Unmarked	Unmarked	Unmarked	Unmarked	Unmarked	Unmarked	Unmarked	Unmarked	Unmarked	Unmarked	Unmarked	Unmarked	Unmarked	Unmarked	Unmarked
NM_001005172	OR52K2	chr11	4470524	4471591	+	Unmarked	Unmarked	Unmarked	Unmarked	Unmarked	Unmarked	Unmarked	Unmarked	Unmarked	Unmarked	Unmarked	Unmarked	Unmarked	Unmarked	Unmarked	Unmarked	Unmarked	Unmarked	Unmarked	Unmarked
NM_001005173	OR52L1	chr11	6007121	6008215	-	Unmarked	Unmarked	Unmarked	Unmarked	Unmarked	Unmarked	Unmarked	Unmarked	Unmarked	Unmarked	Unmarked	Unmarked	Unmarked	Unmarked	Unmarked	Unmarked	Unmarked	Unmarked	Unmarked	Unmarked
NM_001005174	OR52N2	chr11	5841565	5842531	+	Unmarked	Unmarked	Unmarked	Unmarked	Unmarked	Unmarked	Unmarked	Unmarked	Unmarked	Unmarked	Unmarked	Unmarked	Unmarked	Unmarked	Unmarked	Unmarked	Unmarked	Unmarked	Unmarked	Unmarked
NM_001005175	OR52N4	chr11	5775922	5776959	+	Unmarked	Unmarked	Unmarked	Unmarked	Unmarked	Unmarked	Unmarked	Unmarked	Unmarked	Unmarked	Unmarked	Unmarked	Unmarked	Unmarked	Unmarked	Unmarked	Unmarked	Unmarked	Unmarked	Unmarked
NM_001005176	SP140	chr2	231090444	231103791	+	Unmarked	Unmarked	Unmarked	Unmarked	Unmarked	Unmarked	Unmarked	Unmarked	Unmarked	Unmarked	H3K4me3-only	Unmarked	Unmarked	Unmarked	Unmarked	Unmarked	Unmarked	Unmarked	Unmarked	Unmarked
NM_001005177	OR52R1	chr11	4824662	4825610	-	Unmarked	Unmarked	Unmarked	Unmarked	Unmarked	Unmarked	Unmarked	Unmarked	Unmarked	Unmarked	Unmarked	Unmarked	Unmarked	Unmarked	Unmarked	Unmarked	Unmarked	Unmarked	Unmarked	Unmarked
NM_001005178	OR52W1	chr11	6220453	6221416	+	Unmarked	Unmarked	Unmarked	Unmarked	Unmarked	Unmarked	Unmarked	Unmarked	Unmarked	Unmarked	Unmarked	Unmarked	Unmarked	Unmarked	Unmarked	Unmarked	Unmarked	Unmarked	Unmarked	Unmarked
NM_001005179	OR56A4	chr11	6023280	6024378	-	Unmarked	Unmarked	Unmarked	Unmarked	Unmarked	Unmarked	Unmarked	Unmarked	Unmarked	Unmarked	Unmarked	Unmarked	Unmarked	Unmarked	Unmarked	Unmarked	Unmarked	Unmarked	Unmarked	Unmarked
NM_001005180	OR56B1	chr11	5757677	5758768	+	Unmarked	Unmarked	Unmarked	Unmarked	Unmarked	Unmarked	Unmarked	Unmarked	Unmarked	Unmarked	Unmarked	Unmarked	Unmarked	Unmarked	Unmarked	Unmarked	Unmarked	Unmarked	Unmarked	Unmarked
NM_001005181	OR56B4	chr11	6129008	6129968	+	Unmarked	Unmarked	Unmarked	Unmarked	Unmarked	Unmarked	Unmarked	Unmarked	Unmarked	Unmarked	Unmarked	Unmarked	Unmarked	Unmarked	Unmarked	Unmarked	Unmarked	Unmarked	Unmarked	Unmarked
NM_001005182	OR6C1	chr12	55714383	55715322	+	Unmarked	Unmarked	Unmarked	Unmarked	Unmarked	Unmarked	Unmarked	Unmarked	Unmarked	Unmarked	Unmarked	Unmarked	Unmarked	Unmarked	Unmarked	Unmarked	Unmarked	Unmarked	Unmarked	Unmarked
NM_001005183	OR6C76	chr12	55820037	55820976	+	Unmarked	Unmarked	Unmarked	Unmarked	Unmarked	Unmarked	Unmarked	Unmarked	Unmarked	Unmarked	Unmarked	Unmarked	Unmarked	Unmarked	Unmarked	Unmarked	Unmarked	Unmarked	Unmarked	Unmarked
NM_001005184	OR6K6	chr1	158724605	158725637	+	Unmarked	Unmarked	Unmarked	Unmarked	Unmarked	Unmarked	Unmarked	Unmarked	Unmarked	Unmarked	Unmarked	Unmarked	Unmarked	Unmarked	Unmarked	Unmarked	Unmarked	Unmarked	Unmarked	Unmarked
NM_001005185	OR6N1	chr1	158735533	158736472	-	Unmarked	Unmarked	Unmarked	Unmarked	Unmarked	Unmarked	Unmarked	Unmarked	Unmarked	Unmarked	Unmarked	Unmarked	Unmarked	Unmarked	Unmarked	Unmarked	Unmarked	Unmarked	Unmarked	Unmarked
NM_001005186	OR6Q1	chr11	57798424	57799378	+	Unmarked	Unmarked	Unmarked	Unmarked	Unmarked	Unmarked	Unmarked	Unmarked	Unmarked	Unmarked	Unmarked	Unmarked	Unmarked	Unmarked	Unmarked	Unmarked	Unmarked	Unmarked	Unmarked	Unmarked
NM_001005187	OR6T1	chr11	123813573	123814545	-	Unmarked	Unmarked	Unmarked	Unmarked	Unmarked	Unmarked	Unmarked	Unmarked	Unmarked	Unmarked	Unmarked	Unmarked	Unmarked	Unmarked	Unmarked	Unmarked	Unmarked	Unmarked	Unmarked	Unmarked
NM_001005188	OR6X1	chr11	123624287	123625226	-	Unmarked	Unmarked	Unmarked	Unmarked	Unmarked	Unmarked	Unmarked	Unmarked	Unmarked	Unmarked	Unmarked	Unmarked	Unmarked	Unmarked	Unmarked	Unmarked	Unmarked	Unmarked	Unmarked	Unmarked
NM_001005189	OR6Y1	chr1	158516917	158517895	-	Unmarked	Unmarked	Unmarked	Unmarked	Unmarked	Unmarked	Unmarked	Unmarked	Unmarked	Unmarked	Unmarked	Unmarked	Unmarked	Unmarked	Unmarked	Unmarked	Unmarked	Unmarked	Unmarked	Unmarked
NM_001005190	OR7A10	chr19	14951759	14952689	-	Unmarked	Unmarked	Unmarked	Unmarked	Unmarked	Unmarked	Unmarked	Unmarked	Unmarked	Unmarked	Unmarked	Unmarked	Unmarked	Unmarked	Unmarked	Unmarked	Unmarked	Unmarked	Unmarked	Unmarked
NM_001005191	OR7D4	chr19	9324525	9325547	-	Unmarked	Unmarked	Unmarked	Unmarked	Unmarked	Unmarked	Unmarked	Unmarked	Unmarked	Unmarked	Unmarked	Unmarked	Unmarked	Unmarked	Unmarked	Unmarked	Unmarked	Unmarked	Unmarked	Unmarked
NM_001005192	OR7G1	chr19	9225503	9226439	-	Unmarked	Unmarked	Unmarked	Unmarked	Unmarked	H3K27me3-only	Unmarked	Unmarked	Unmarked	Unmarked	Unmarked	Unmarked	Unmarked	Unmarked	Unmarked	Unmarked	Unmarked	Unmarked	Unmarked	Unmarked
NM_001005193	OR7G2	chr19	9212944	9213982	-	Unmarked	Unmarked	Unmarked	Unmarked	Unmarked	Unmarked	Unmarked	Unmarked	Unmarked	Unmarked	Unmarked	Unmarked	H3K27me3-only	Unmarked	Unmarked	Unmarked	Unmarked	Unmarked	Unmarked	Unmarked
NM_001005194	OR8A1	chr11	124439964	124440945	+	Unmarked	Unmarked	Unmarked	Unmarked	Unmarked	Unmarked	Unmarked	Unmarked	Unmarked	Unmarked	Unmarked	Unmarked	Unmarked	Unmarked	Unmarked	Unmarked	Unmarked	Unmarked	Unmarked	Unmarked
NM_001005195	OR8B12	chr11	124412617	124413550	-	Unmarked	Unmarked	Unmarked	Unmarked	Unmarked	Unmarked	Unmarked	Unmarked	Unmarked	Unmarked	Unmarked	Unmarked	Unmarked	Unmarked	Unmarked	Unmarked	Unmarked	Unmarked	Unmarked	Unmarked
NM_001005196	OR8B4	chr11	124293837	124294767	-	Unmarked	Unmarked	Unmarked	Unmarked	Unmarked	Unmarked	Unmarked	Unmarked	Unmarked	Unmarked	Unmarked	Unmarked	Unmarked	Unmarked	Unmarked	Unmarked	Unmarked	Unmarked	Unmarked	Unmarked
NM_001005197	OR8D4	chr11	123777138	123778083	+	Unmarked	Unmarked	Unmarked	Unmarked	Unmarked	Unmarked	Unmarked	Unmarked	Unmarked	Unmarked	Unmarked	Unmarked	Unmarked	Unmarked	Unmarked	Unmarked	Unmarked	Unmarked	Unmarked	Unmarked
NM_001005198	OR8G5	chr11	124134722	124135763	+	Unmarked	Unmarked	Unmarked	Unmarked	Unmarked	Unmarked	Unmarked	Unmarked	Unmarked	Unmarked	Unmarked	Unmarked	Unmarked	Unmarked	Unmarked	Unmarked	Unmarked	Unmarked	Unmarked	Unmarked
NM_001005199	OR8H1	chr11	56057602	56058538	-	Unmarked	Unmarked	Unmarked	Unmarked	Unmarked	Unmarked	Unmarked	Unmarked	Unmarked	Unmarked	Unmarked	Unmarked	Unmarked	Unmarked	Unmarked	Unmarked	Unmarked	Unmarked	Unmarked	Unmarked
NM_001005200	OR8H2	chr11	55872518	55873457	+	Unmarked	Unmarked	Unmarked	Unmarked	Unmarked	Unmarked	Unmarked	Unmarked	Unmarked	Unmarked	Unmarked	Unmarked	Unmarked	Unmarked	Unmarked	Unmarked	Unmarked	Unmarked	Unmarked	Unmarked
NM_001005201	OR8H3	chr11	55889848	55890787	+	Unmarked	Unmarked	Unmarked	Unmarked	Unmarked	Unmarked	Unmarked	Unmarked	Unmarked	Unmarked	Unmarked	Unmarked	Unmarked	Unmarked	Unmarked	Unmarked	Unmarked	Unmarked	Unmarked	Unmarked
NM_001005202	OR8K3	chr11	56085782	56086721	+	Unmarked	Unmarked	Unmarked	Unmarked	Unmarked	Unmarked	Unmarked	Unmarked	Unmarked	Unmarked	Unmarked	Unmarked	Unmarked	Unmarked	Unmarked	Unmarked	Unmarked	Unmarked	Unmarked	Unmarked
NM_001005203	OR8S1	chr12	48919414	48921886	+	Unmarked	Unmarked	Unmarked	Unmarked	Unmarked	Unmarked	Unmarked	Unmarked	Unmarked	Unmarked	Unmarked	Unmarked	Unmarked	Unmarked	Unmarked	Unmarked	Unmarked	Unmarked	Unmarked	Unmarked
NM_001005204	OR8U1	chr11	56143099	56144029	+	Unmarked	Unmarked	Unmarked	Unmarked	Unmarked	Unmarked	Unmarked	Unmarked	Unmarked	Unmarked	Unmarked	Unmarked	Unmarked	Unmarked	Unmarked	Unmarked	Unmarked	Unmarked	Unmarked	Unmarked
NM_001005205	OR8J1	chr11	56127690	56128764	+	Unmarked	Unmarked	Unmarked	Unmarked	Unmarked	Unmarked	Unmarked	Unmarked	Unmarked	Unmarked	Unmarked	Unmarked	Unmarked	Unmarked	Unmarked	Unmarked	Unmarked	Unmarked	Unmarked	Unmarked
NM_001005209	TMEM198	chr2	220408744	220415317	+	H3K4me3-only	Bivalent	Bivalent	H3K4me3-only	H3K4me3-only	Bivalent	H3K4me3-only	H3K4me3-only	H3K4me3-only	H3K4me3-only	H3K4me3-only	H3K4me3-only	H3K4me3-only	H3K4me3-only	Bivalent	H3K4me3-only	H3K4me3-only	H3K4me3-only	H3K4me3-only	H3K4me3-only
NM_001005210	LRRC55	chr11	56949220	56959188	+	H3K27me3-only	H3K27me3-only	Bivalent	H3K27me3-only	H3K27me3-only	H3K27me3-only	H3K27me3-only	H3K27me3-only	H3K27me3-only	H3K27me3-only	H3K27me3-only	H3K27me3-only	Unmarked	H3K27me3-only	Unmarked	Unmarked	Unmarked	Unmarked	Unmarked	Unmarked
NM_001005211	OR9I1	chr11	57885971	57886916	-	Unmarked	Unmarked	Unmarked	Unmarked	Unmarked	Unmarked	Unmarked	Unmarked	Unmarked	Unmarked	Unmarked	Unmarked	Unmarked	Unmarked	Unmarked	Unmarked	Unmarked	Unmarked	Unmarked	Unmarked
NM_001005212	OR9Q1	chr11	57791352	57949038	+	Unmarked	Unmarked	Unmarked	Unmarked	Unmarked	Unmarked	Unmarked	Unmarked	Unmarked	Unmarked	Unmarked	Unmarked	Unmarked	Unmarked	Unmarked	Unmarked	Unmarked	Unmarked	Unmarked	Unmarked
NM_001005214	LRRC52	chr1	165513477	165533185	+	Unmarked	H3K27me3-only	Unmarked	Unmarked	H3K27me3-only	H3K27me3-only	Unmarked	Unmarked	H3K27me3-only	Unmarked	H3K27me3-only	Unmarked	Unmarked	Unmarked	Unmarked	Unmarked	Unmarked	Unmarked	Unmarked	Unmarked
NM_001005216	OR2J3	chr6	29079586	29080661	+	Unmarked	Unmarked	Unmarked	Unmarked	Unmarked	Unmarked	Unmarked	Unmarked	Unmarked	Unmarked	Unmarked	Unmarked	Unmarked	Unmarked	Unmarked	Unmarked	Unmarked	Unmarked	Unmarked	Unmarked
NM_001005217	FRG2	chr4	190945522	190948412	-	Unmarked	Unmarked	Unmarked	Unmarked	Unmarked	Unmarked	Unmarked	Unmarked	Unmarked	Unmarked	Unmarked	Unmarked	Unmarked	Unmarked	Unmarked	Unmarked	Unmarked	Unmarked	Unmarked	Unmarked
NM_001005218	OR5B21	chr11	58274648	58275578	-	Unmarked	Unmarked	Unmarked	Unmarked	Unmarked	Unmarked	Unmarked	Unmarked	Unmarked	Unmarked	Unmarked	Unmarked	Unmarked	Unmarked	Unmarked	Unmarked	Unmarked	Unmarked	Unmarked	Unmarked
NM_001005226	OR2B3	chr6	29053984	29055090	-	Unmarked	Unmarked	Unmarked	Unmarked	Unmarked	Unmarked	Unmarked	Unmarked	Unmarked	Unmarked	Unmarked	Unmarked	Unmarked	Unmarked	Unmarked	Unmarked	Unmarked	Unmarked	Unmarked	Unmarked
NM_001005234	OR1L3	chr9	125437408	125438383	+	Unmarked	Unmarked	Unmarked	Unmarked	Unmarked	Unmarked	Unmarked	Unmarked	Unmarked	Unmarked	Unmarked	Unmarked	Unmarked	Unmarked	Unmarked	Unmarked	Unmarked	Unmarked	Unmarked	Unmarked
NM_001005235	OR1L4	chr9	125486268	125487204	+	Unmarked	Unmarked	Unmarked	Unmarked	Unmarked	Unmarked	Unmarked	Unmarked	Unmarked	Unmarked	Unmarked	Unmarked	Unmarked	Unmarked	Unmarked	Unmarked	Unmarked	Unmarked	Unmarked	Unmarked
NM_001005236	OR1L1	chr9	125423994	125424927	+	Unmarked	Unmarked	Unmarked	Unmarked	Unmarked	Unmarked	Unmarked	Unmarked	Unmarked	Unmarked	Unmarked	Unmarked	Unmarked	Unmarked	Unmarked	Unmarked	Unmarked	Unmarked	Unmarked	Unmarked
NM_001005237	OR51G1	chr11	4944603	4945569	-	Unmarked	Unmarked	Unmarked	Unmarked	Unmarked	Unmarked	Unmarked	Unmarked	Unmarked	Unmarked	Unmarked	Unmarked	Unmarked	Unmarked	Unmarked	Unmarked	Unmarked	Unmarked	Unmarked	Unmarked
NM_001005238	OR51G2	chr11	4935948	4936893	-	Unmarked	Unmarked	Unmarked	Unmarked	Unmarked	Unmarked	Unmarked	Unmarked	Unmarked	Unmarked	Unmarked	Unmarked	Unmarked	Unmarked	Unmarked	Unmarked	Unmarked	Unmarked	Unmarked	Unmarked
NM_001005239	OR11H1	chr22	16448823	16449804	-	Unmarked	Unmarked	Unmarked	Unmarked	Unmarked	Unmarked	Unmarked	Unmarked	Unmarked	Unmarked	Unmarked	Unmarked	Unmarked	Unmarked	Unmarked	Unmarked	Unmarked	Unmarked	Unmarked	Unmarked
NM_001005240	OR4F17	chr19	110678	111596	+	Unmarked	Unmarked	Unmarked	Unmarked	Unmarked	Unmarked	Unmarked	Unmarked	Unmarked	Unmarked	Unmarked	Unmarked	Unmarked	Unmarked	Unmarked	Unmarked	Unmarked	Unmarked	Unmarked	Unmarked
NM_001005241	OR4N4	chr15	22382472	22383815	+	Unmarked	Unmarked	Unmarked	Unmarked	Unmarked	Unmarked	Unmarked	Unmarked	Unmarked	Unmarked	Unmarked	Unmarked	Unmarked	Unmarked	Unmarked	Unmarked	Unmarked	Unmarked	Unmarked	Unmarked
NM_001005242	PKP2	chr12	32943679	33049780	-	H3K4me3-only	Bivalent	Bivalent	Bivalent	Bivalent	H3K4me3-only	H3K4me3-only	H3K4me3-only	H3K4me3-only	Bivalent	Bivalent	H3K4me3-only	H3K4me3-only	H3K27me3-only	H3K4me3-only	H3K4me3-only	H3K4me3-only	H3K4me3-only	H3K4me3-only	H3K4me3-only
NM_001005243	OR9K2	chr12	55523552	55524560	+	Unmarked	Unmarked	Unmarked	Unmarked	Unmarked	Unmarked	Unmarked	Unmarked	Unmarked	Unmarked	Unmarked	Unmarked	Unmarked	Unmarked	Unmarked	Unmarked	Unmarked	Unmarked	Unmarked	Unmarked
NM_001005245	OR5M11	chr11	56309815	56310733	-	Unmarked	Unmarked	Unmarked	Unmarked	Unmarked	Unmarked	Unmarked	Unmarked	Unmarked	Unmarked	Unmarked	Unmarked	Unmarked	Unmarked	Unmarked	Unmarked	Unmarked	Unmarked	Unmarked	Unmarked
NM_001005270	OR4C12	chr11	50003008	50004071	-	Unmarked	Unmarked	Unmarked	Unmarked	Unmarked	Unmarked	Unmarked	Unmarked	Unmarked	Unmarked	Unmarked	Unmarked	Unmarked	Unmarked	Unmarked	Unmarked	Unmarked	Unmarked	Unmarked	Unmarked
NM_001005271	CHD3	chr17	7788122	7816075	+	Bivalent	Bivalent	H3K4me3-only	H3K4me3-only	H3K4me3-only	H3K4me3-only	H3K4me3-only	H3K4me3-only	H3K4me3-only	H3K4me3-only	H3K4me3-only	H3K4me3-only	H3K4me3-only	H3K4me3-only	H3K4me3-only	H3K4me3-only	H3K4me3-only	H3K4me3-only	H3K4me3-only	H3K4me3-only
NM_001005272	OR4A5	chr11	51411377	51412448	-	Unmarked	Unmarked	Unmarked	Unmarked	Unmarked	Unmarked	Unmarked	Unmarked	Unmarked	Unmarked	Unmarked	Unmarked	Unmarked	Unmarked	Unmarked	Unmarked	Unmarked	Unmarked	Unmarked	Unmarked
NM_001005274	OR4A16	chr11	55110676	55111663	+	Unmarked	Unmarked	Unmarked	Unmarked	Unmarked	Unmarked	Unmarked	Unmarked	Unmarked	Unmarked	Unmarked	Unmarked	Unmarked	Unmarked	Unmarked	Unmarked	Unmarked	Unmarked	Unmarked	Unmarked
NM_001005275	OR4A15	chr11	55135359	55136394	+	Unmarked	Unmarked	Unmarked	Unmarked	Unmarked	Unmarked	Unmarked	Unmarked	Unmarked	Unmarked	Unmarked	Unmarked	Unmarked	Unmarked	Unmarked	Unmarked	Unmarked	Unmarked	Unmarked	Unmarked
NM_001005276	OR2AE1	chr7	99473684	99474656	-	Unmarked	Unmarked	Unmarked	Unmarked	Unmarked	Unmarked	Unmarked	Unmarked	Unmarked	Unmarked	Unmarked	Unmarked	Unmarked	Unmarked	Unmarked	Unmarked	Unmarked	Unmarked	Unmarked	Unmarked
NM_001005278	OR6N2	chr1	158746471	158747425	-	Unmarked	Unmarked	Unmarked	Unmarked	Unmarked	Unmarked	Unmarked	Unmarked	Unmarked	Unmarked	Unmarked	Unmarked	Unmarked	Unmarked	Unmarked	Unmarked	Unmarked	Unmarked	Unmarked	Unmarked
NM_001005279	OR6K2	chr1	158669467	158670442	-	Unmarked	Unmarked	Unmarked	Unmarked	Unmarked	Unmarked	Unmarked	Unmarked	Unmarked	Unmarked	Unmarked	Unmarked	Unmarked	Unmarked	Unmarked	Unmarked	Unmarked	Unmarked	Unmarked	Unmarked
NM_001005280	OR10A7	chr12	55614808	55615759	+	Unmarked	Unmarked	Unmarked	Unmarked	Unmarked	Unmarked	Unmarked	Unmarked	Unmarked	Unmarked	Unmarked	Unmarked	Unmarked	Unmarked	Unmarked	Unmarked	Unmarked	Unmarked	Unmarked	Unmarked
NM_001005281	OR6B1	chr7	143701089	143702025	+	Unmarked	Unmarked	Unmarked	Unmarked	Unmarked	Unmarked	Unmarked	Unmarked	Unmarked	Unmarked	Unmarked	Unmarked	Unmarked	Unmarked	Unmarked	Unmarked	Unmarked	Unmarked	Unmarked	Unmarked
NM_001005282	OR5M8	chr11	56257910	56258846	-	Unmarked	Unmarked	Unmarked	Unmarked	Unmarked	Unmarked	Unmarked	Unmarked	Unmarked	Unmarked	Unmarked	Unmarked	Unmarked	Unmarked	Unmarked	Unmarked	Unmarked	Unmarked	Unmarked	Unmarked
NM_001005283	OR9Q2	chr11	57957905	57958990	+	Unmarked	Unmarked	Unmarked	Unmarked	Unmarked	Unmarked	Unmarked	Unmarked	Unmarked	Unmarked	Unmarked	Unmarked	Unmarked	Unmarked	Unmarked	Unmarked	Unmarked	Unmarked	Unmarked	Unmarked
NM_001005284	OR9G4	chr11	56510303	56511287	-	Unmarked	Unmarked	Unmarked	Unmarked	Unmarked	Unmarked	Unmarked	Unmarked	Unmarked	Unmarked	Unmarked	Unmarked	Unmarked	Unmarked	Unmarked	Unmarked	Unmarked	Unmarked	Unmarked	Unmarked
NM_001005285	OR2AT4	chr11	74799795	74800758	-	Unmarked	Unmarked	Unmarked	H3K27me3-only	Unmarked	Unmarked	Unmarked	Unmarked	Unmarked	Unmarked	Unmarked	Unmarked	Unmarked	H3K27me3-only	Unmarked	Unmarked	Unmarked	Unmarked	Unmarked	Unmarked
NM_001005286	OR6F1	chr1	247875130	247876057	-	Unmarked	Unmarked	Unmarked	Unmarked	Unmarked	Unmarked	Unmarked	Unmarked	Unmarked	Unmarked	Unmarked	Unmarked	Unmarked	Unmarked	Unmarked	Unmarked	Unmarked	Unmarked	Unmarked	Unmarked
NM_001005288	OR51I1	chr11	5461771	5462783	-	Unmarked	Unmarked	Unmarked	Unmarked	Unmarked	Unmarked	Unmarked	Unmarked	Unmarked	Unmarked	Unmarked	Unmarked	Unmarked	Unmarked	Unmarked	Unmarked	Unmarked	Unmarked	Unmarked	Unmarked
NM_001005289	OR52H1	chr11	5565790	5566753	-	Unmarked	Unmarked	Unmarked	Unmarked	Unmarked	Unmarked	Unmarked	Unmarked	Unmarked	Unmarked	Unmarked	Unmarked	Unmarked	Unmarked	Unmarked	Unmarked	Unmarked	Unmarked	Unmarked	Unmarked
NM_001005291	SREBF1	chr17	17714662	17740325	-	H3K4me3-only	H3K4me3-only	H3K4me3-only	H3K4me3-only	H3K4me3-only	H3K4me3-only	H3K4me3-only	H3K4me3-only	H3K4me3-only	H3K4me3-only	H3K4me3-only	H3K4me3-only	H3K4me3-only	H3K4me3-only	H3K4me3-only	H3K4me3-only	H3K4me3-only	H3K4me3-only	H3K4me3-only	H3K4me3-only
NM_001005323	OR5AK2	chr11	56756388	56757318	+	Unmarked	Unmarked	Unmarked	Unmarked	Unmarked	Unmarked	Unmarked	Unmarked	Unmarked	Unmarked	Unmarked	Unmarked	Unmarked	Unmarked	Unmarked	Unmarked	Unmarked	Unmarked	Unmarked	Unmarked
NM_001005324	OR10V1	chr11	59480388	59481318	-	Unmarked	Unmarked	Unmarked	Unmarked	Unmarked	Unmarked	Unmarked	Unmarked	Unmarked	Unmarked	Unmarked	Unmarked	Unmarked	Unmarked	Unmarked	Unmarked	Unmarked	Unmarked	Unmarked	Unmarked
NM_001005325	OR6M1	chr11	123676115	123677057	-	Unmarked	Unmarked	Unmarked	Unmarked	Unmarked	Unmarked	Unmarked	Unmarked	Unmarked	Unmarked	Unmarked	Unmarked	Unmarked	Unmarked	Unmarked	Unmarked	Unmarked	Unmarked	Unmarked	Unmarked
NM_001005326	OR4F6	chr15	102345922	102346861	+	Unmarked	Unmarked	Unmarked	Unmarked	Unmarked	Unmarked	Unmarked	Unmarked	Unmarked	Unmarked	Unmarked	Unmarked	Unmarked	Unmarked	Unmarked	Unmarked	Unmarked	Unmarked	Unmarked	Unmarked
NM_001005327	OR6K3	chr1	158686957	158687905	-	Unmarked	Unmarked	Unmarked	Unmarked	Unmarked	Unmarked	Unmarked	Unmarked	Unmarked	Unmarked	Unmarked	Unmarked	Unmarked	Unmarked	Unmarked	Unmarked	Unmarked	Unmarked	Unmarked	Unmarked
NM_001005328	OR2A7	chr7	143955788	143956721	-	Unmarked	Unmarked	Unmarked	Unmarked	Unmarked	Unmarked	Unmarked	Unmarked	Unmarked	Unmarked	Unmarked	Unmarked	Unmarked	Unmarked	Unmarked	Unmarked	Unmarked	Unmarked	Unmarked	Unmarked
NM_001005329	OR51A4	chr11	4967388	4968330	-	Unmarked	Unmarked	Unmarked	Unmarked	Unmarked	Unmarked	Unmarked	Unmarked	Unmarked	Unmarked	Unmarked	Unmarked	Unmarked	Unmarked	Unmarked	Unmarked	Unmarked	Unmarked	Unmarked	Unmarked
NM_001005332	MAGED1	chrX	51546154	51645450	+	H3K4me3-only	H3K4me3-only	H3K4me3-only	H3K4me3-only	H3K4me3-only	Bivalent	H3K4me3-only	H3K4me3-only	H3K4me3-only	H3K4me3-only	H3K4me3-only	H3K4me3-only	Bivalent	H3K4me3-only	H3K4me3-only	H3K4me3-only	H3K4me3-only	H3K4me3-only	H3K4me3-only	H3K4me3-only
NM_001005333	MAGED1	chrX	51636697	51645450	+	H3K4me3-only	H3K4me3-only	H3K4me3-only	H3K4me3-only	H3K4me3-only	H3K4me3-only	H3K4me3-only	H3K4me3-only	H3K4me3-only	H3K4me3-only	H3K4me3-only	H3K4me3-only	H3K4me3-only	H3K4me3-only	H3K4me3-only	H3K4me3-only	H3K4me3-only	H3K4me3-only	H3K4me3-only	H3K4me3-only
NM_001005335	HNRNPL	chr19	39327027	39342979	-	H3K4me3-only	H3K4me3-only	H3K4me3-only	H3K4me3-only	H3K4me3-only	H3K4me3-only	H3K4me3-only	H3K4me3-only	H3K4me3-only	H3K4me3-only	H3K4me3-only	H3K4me3-only	H3K4me3-only	H3K4me3-only	H3K4me3-only	H3K4me3-only	H3K4me3-only	H3K4me3-only	H3K4me3-only	H3K4me3-only
NM_001005336	DNM1	chr9	130965662	131017527	+	H3K4me3-only	H3K4me3-only	Bivalent	H3K4me3-only	H3K4me3-only	H3K4me3-only	H3K4me3-only	H3K4me3-only	Bivalent	H3K4me3-only	H3K4me3-only	H3K4me3-only	H3K4me3-only	H3K4me3-only	H3K4me3-only	H3K4me3-only	H3K4me3-only	H3K4me3-only	H3K4me3-only	H3K4me3-only
NM_001005338	OR5H1	chr3	97851541	97852483	+	Unmarked	Unmarked	Unmarked	Unmarked	Unmarked	Unmarked	Unmarked	Unmarked	Unmarked	Unmarked	Unmarked	Unmarked	Unmarked	Unmarked	Unmarked	Unmarked	Unmarked	Unmarked	Unmarked	Unmarked
NM_001005339	RGS10	chr10	121259338	121302222	-	Bivalent	Bivalent	Bivalent	H3K4me3-only	H3K4me3-only	H3K4me3-only	Bivalent	Bivalent	H3K4me3-only	H3K4me3-only	H3K4me3-only	H3K4me3-only	H3K4me3-only	H3K4me3-only	H3K4me3-only	H3K4me3-only	H3K4me3-only	H3K4me3-only	H3K4me3-only	H3K4me3-only
NM_001005353	AK4	chr1	65613512	65697828	+	Bivalent	Bivalent	Bivalent	Bivalent	Bivalent	Bivalent	Bivalent	Bivalent	H3K4me3-only	Bivalent	Bivalent	H3K4me3-only	H3K4me3-only	Bivalent	H3K4me3-only	H3K4me3-only	H3K4me3-only	H3K4me3-only	H3K4me3-only	H3K4me3-only
NM_001005362	DNM2	chr19	10828728	10942586	+	H3K4me3-only	H3K4me3-only	H3K4me3-only	H3K4me3-only	H3K4me3-only	H3K4me3-only	H3K4me3-only	H3K4me3-only	H3K4me3-only	H3K4me3-only	H3K4me3-only	H3K4me3-only	H3K4me3-only	H3K4me3-only	H3K4me3-only	H3K4me3-only	H3K4me3-only	H3K4me3-only	H3K4me3-only	H3K4me3-only
NM_001005365	POTEA	chr8	43147584	43218328	+	Unmarked	Unmarked	Unmarked	Unmarked	Unmarked	Unmarked	Unmarked	Unmarked	Unmarked	Unmarked	Unmarked	Unmarked	H3K27me3-only	Unmarked	Unmarked	Unmarked	Unmarked	Unmarked	Unmarked	Unmarked
NM_001005366	KDM2B	chr12	121866899	122018364	-	H3K4me3-only	H3K4me3-only	H3K4me3-only	H3K4me3-only	H3K4me3-only	H3K4me3-only	H3K4me3-only	H3K4me3-only	H3K4me3-only	H3K4me3-only	H3K4me3-only	H3K4me3-only	H3K4me3-only	H3K4me3-only	H3K4me3-only	H3K4me3-only	H3K4me3-only	H3K4me3-only	H3K4me3-only	H3K4me3-only
NM_001005368	ZNF32	chr10	44139306	44144152	-	Bivalent	Bivalent	H3K4me3-only	H3K4me3-only	H3K4me3-only	H3K4me3-only	H3K4me3-only	H3K4me3-only	H3K4me3-only	H3K4me3-only	H3K4me3-only	H3K4me3-only	H3K4me3-only	H3K4me3-only	H3K4me3-only	H3K4me3-only	H3K4me3-only	H3K4me3-only	H3K4me3-only	H3K4me3-only
NM_001005369	MTIF2	chr2	55463755	55496315	-	H3K4me3-only	H3K4me3-only	H3K4me3-only	H3K4me3-only	H3K4me3-only	H3K4me3-only	H3K4me3-only	H3K4me3-only	H3K4me3-only	H3K4me3-only	H3K4me3-only	H3K4me3-only	H3K4me3-only	H3K4me3-only	H3K4me3-only	H3K4me3-only	H3K4me3-only	H3K4me3-only	H3K4me3-only	H3K4me3-only
NM_001005373	LRSAM1	chr9	130213764	130265780	+	H3K4me3-only	H3K4me3-only	H3K4me3-only	H3K4me3-only	H3K4me3-only	H3K4me3-only	H3K4me3-only	H3K4me3-only	H3K4me3-only	H3K4me3-only	H3K4me3-only	H3K4me3-only	H3K4me3-only	H3K4me3-only	H3K4me3-only	H3K4me3-only	H3K4me3-only	H3K4me3-only	H3K4me3-only	H3K4me3-only
NM_001005374	LRSAM1	chr9	130214533	130265780	+	H3K4me3-only	H3K4me3-only	H3K4me3-only	H3K4me3-only	H3K4me3-only	H3K4me3-only	H3K4me3-only	H3K4me3-only	H3K4me3-only	H3K4me3-only	H3K4me3-only	H3K4me3-only	H3K4me3-only	H3K4me3-only	H3K4me3-only	H3K4me3-only	H3K4me3-only	H3K4me3-only	H3K4me3-only	H3K4me3-only
NM_001005377	PLAUR	chr19	44152722	44174498	-	H3K4me3-only	Bivalent	Bivalent	H3K4me3-only	H3K4me3-only	H3K4me3-only	Bivalent	Bivalent	H3K4me3-only	H3K4me3-only	H3K4me3-only	H3K4me3-only	H3K4me3-only	H3K4me3-only	H3K4me3-only	H3K4me3-only	H3K4me3-only	H3K4me3-only	H3K4me3-only	H3K4me3-only
NM_001005386	ACTR2	chr2	65454828	65498390	+	H3K4me3-only	H3K4me3-only	H3K4me3-only	H3K4me3-only	H3K4me3-only	H3K4me3-only	H3K4me3-only	H3K4me3-only	H3K4me3-only	H3K4me3-only	H3K4me3-only	H3K4me3-only	H3K4me3-only	H3K4me3-only	H3K4me3-only	H3K4me3-only	H3K4me3-only	H3K4me3-only	H3K4me3-only	H3K4me3-only
NM_001005388	NFASC	chr1	204797781	204991950	+	H3K4me3-only	H3K4me3-only	Bivalent	Bivalent	H3K4me3-only	Bivalent	Bivalent	Bivalent	H3K27me3-only	Bivalent	Bivalent	Bivalent	H3K4me3-only	H3K4me3-only	H3K27me3-only	H3K4me3-only	H3K4me3-only	H3K4me3-only	Unmarked	H3K4me3-only
NM_001005404	YPEL2	chr17	57409052	57479095	+	Bivalent	Bivalent	Bivalent	H3K4me3-only	H3K4me3-only	H3K4me3-only	H3K4me3-only	H3K4me3-only	Bivalent	H3K4me3-only	H3K4me3-only	H3K4me3-only	H3K4me3-only	H3K4me3-only	H3K4me3-only	H3K4me3-only	H3K4me3-only	H3K4me3-only	H3K4me3-only	H3K4me3-only
NM_001005405	KRTAP5-11	chr11	71292900	71293921	-	Unmarked	Unmarked	H3K27me3-only	H3K27me3-only	Unmarked	Unmarked	Unmarked	Unmarked	H3K27me3-only	Unmarked	Unmarked	Unmarked	Unmarked	Unmarked	Unmarked	Unmarked	Unmarked	Unmarked	Unmarked	Unmarked
NM_001005408	NEURL4	chr17	7218950	7232638	-	H3K4me3-only	H3K4me3-only	H3K4me3-only	H3K4me3-only	H3K4me3-only	H3K4me3-only	H3K4me3-only	H3K4me3-only	H3K4me3-only	H3K4me3-only	H3K4me3-only	H3K4me3-only	H3K4me3-only	H3K4me3-only	H3K4me3-only	H3K4me3-only	H3K4me3-only	H3K4me3-only	H3K4me3-only	H3K4me3-only
NM_001005416	MARCH2	chr19	8478186	8503899	+	H3K4me3-only	H3K4me3-only	H3K4me3-only	H3K4me3-only	H3K4me3-only	H3K4me3-only	H3K4me3-only	H3K4me3-only	H3K4me3-only	H3K4me3-only	H3K4me3-only	H3K4me3-only	H3K4me3-only	H3K4me3-only	H3K4me3-only	H3K4me3-only	H3K4me3-only	H3K4me3-only	H3K4me3-only	H3K4me3-only
NM_001005417	B4GALT2	chr1	44446176	44456843	+	H3K4me3-only	H3K4me3-only	H3K4me3-only	H3K4me3-only	H3K4me3-only	Unmarked	H3K4me3-only	H3K4me3-only	H3K4me3-only	H3K4me3-only	Unmarked	H3K4me3-only	H3K4me3-only	H3K4me3-only	H3K4me3-only	Unmarked	H3K4me3-only	Unmarked	H3K4me3-only	H3K4me3-only
NM_001005463	EBF3	chr10	131633495	131762091	-	Bivalent	Bivalent	Bivalent	Bivalent	Bivalent	Bivalent	Bivalent	Bivalent	Bivalent	Bivalent	Bivalent	Bivalent	Bivalent	Bivalent	Bivalent	H3K4me3-only	H3K4me3-only	H3K4me3-only	H3K4me3-only	H3K4me3-only
NM_001005465	OR10G3	chr14	22037933	22038875	-	Unmarked	Unmarked	Unmarked	Unmarked	Unmarked	Unmarked	Unmarked	Unmarked	Unmarked	Unmarked	Unmarked	Unmarked	Unmarked	Unmarked	Unmarked	Unmarked	Unmarked	Unmarked	Unmarked	Unmarked
NM_001005466	OR10G2	chr14	22102065	22102998	-	Unmarked	Unmarked	Unmarked	Unmarked	Unmarked	Unmarked	Unmarked	Unmarked	Unmarked	Unmarked	Unmarked	Unmarked	Unmarked	Unmarked	Unmarked	Unmarked	Unmarked	Unmarked	Unmarked	Unmarked
NM_001005467	OR8B3	chr11	124266305	124267247	-	Unmarked	Unmarked	Unmarked	Unmarked	Unmarked	Unmarked	Unmarked	Unmarked	Unmarked	Unmarked	Unmarked	Unmarked	Unmarked	Unmarked	Unmarked	Unmarked	Unmarked	Unmarked	Unmarked	Unmarked
NM_001005468	OR8B2	chr11	124252297	124253239	-	Unmarked	Unmarked	Unmarked	Unmarked	Unmarked	Unmarked	Unmarked	Unmarked	Unmarked	Unmarked	Unmarked	Unmarked	Unmarked	Unmarked	Unmarked	Unmarked	Unmarked	Unmarked	Unmarked	Unmarked
NM_001005469	OR5B3	chr11	58169937	58170882	-	Unmarked	Unmarked	Unmarked	Unmarked	Unmarked	Unmarked	Unmarked	Unmarked	Unmarked	Unmarked	Unmarked	Unmarked	Unmarked	Unmarked	Unmarked	Unmarked	Unmarked	Unmarked	Unmarked	Unmarked
NM_001005470	OR4B1	chr11	48238361	48239291	+	Unmarked	Unmarked	Unmarked	Unmarked	Unmarked	Unmarked	Unmarked	Unmarked	Unmarked	Unmarked	Unmarked	Unmarked	Unmarked	Unmarked	Unmarked	Unmarked	Unmarked	Unmarked	Unmarked	Unmarked
NM_001005471	OR2T6	chr1	248550909	248551836	+	Unmarked	Unmarked	Unmarked	Unmarked	Unmarked	Unmarked	Unmarked	Unmarked	Unmarked	Unmarked	Unmarked	Unmarked	Unmarked	Unmarked	Unmarked	Unmarked	Unmarked	Unmarked	Unmarked	Unmarked
NM_001005473	PLCXD3	chr5	41307047	41510730	-	Bivalent	Bivalent	Bivalent	Bivalent	H3K4me3-only	Bivalent	Bivalent	Bivalent	H3K27me3-only	Bivalent	H3K27me3-only	Bivalent	Bivalent	Bivalent	H3K27me3-only	H3K4me3-only	H3K4me3-only	H3K4me3-only	H3K4me3-only	H3K4me3-only
NM_001005474	NFKBIZ	chr3	101546833	101579869	+	H3K4me3-only	H3K4me3-only	H3K4me3-only	H3K4me3-only	H3K4me3-only	H3K4me3-only	H3K4me3-only	H3K4me3-only	H3K4me3-only	H3K4me3-only	H3K4me3-only	H3K4me3-only	H3K4me3-only	H3K4me3-only	H3K4me3-only	H3K4me3-only	H3K4me3-only	H3K4me3-only	H3K4me3-only	H3K4me3-only
NM_001005476	PKP4	chr2	159313475	159537940	+	H3K4me3-only	H3K4me3-only	Bivalent	H3K4me3-only	H3K4me3-only	H3K4me3-only	H3K4me3-only	H3K4me3-only	H3K4me3-only	H3K4me3-only	H3K4me3-only	H3K4me3-only	H3K4me3-only	H3K4me3-only	H3K4me3-only	H3K4me3-only	H3K4me3-only	H3K4me3-only	H3K4me3-only	H3K4me3-only
NM_001005479	OR5H6	chr3	97983128	97984106	+	Unmarked	Unmarked	Unmarked	Unmarked	Unmarked	Unmarked	Unmarked	Unmarked	Unmarked	Unmarked	Unmarked	Unmarked	Unmarked	Unmarked	Unmarked	Unmarked	Unmarked	Unmarked	Unmarked	Unmarked
NM_001005480	OR2A2	chr7	143806675	143807632	+	Unmarked	Unmarked	Unmarked	Unmarked	Unmarked	Unmarked	Unmarked	Unmarked	Unmarked	Unmarked	Unmarked	Unmarked	Unmarked	Unmarked	Unmarked	Unmarked	Unmarked	Unmarked	Unmarked	Unmarked
NM_001005482	OR5H2	chr3	98001731	98002676	+	Unmarked	Unmarked	Unmarked	Unmarked	Unmarked	Unmarked	Unmarked	Unmarked	Unmarked	Unmarked	Unmarked	Unmarked	Unmarked	Unmarked	Unmarked	Unmarked	Unmarked	Unmarked	Unmarked	Unmarked
NM_001005483	OR4K5	chr14	20388765	20389737	+	Unmarked	Unmarked	Unmarked	Unmarked	Unmarked	Unmarked	Unmarked	Unmarked	Unmarked	Unmarked	Unmarked	Unmarked	Unmarked	Unmarked	Unmarked	Unmarked	Unmarked	Unmarked	Unmarked	Unmarked
NM_001005484	OR4F5	chr1	69090	70008	+	Unmarked	Unmarked	Unmarked	Unmarked	Unmarked	Unmarked	Unmarked	Unmarked	Unmarked	Unmarked	Unmarked	Unmarked	Unmarked	Unmarked	Unmarked	Unmarked	Unmarked	Unmarked	Unmarked	Unmarked
NM_001005486	OR4K15	chr14	20443677	20444724	+	Unmarked	Unmarked	Unmarked	Unmarked	Unmarked	Unmarked	Unmarked	Unmarked	Unmarked	Unmarked	Unmarked	Unmarked	Unmarked	Unmarked	Unmarked	Unmarked	Unmarked	Unmarked	Unmarked	Unmarked
NM_001005487	OR13G1	chr1	247835419	247836343	-	Unmarked	Unmarked	Unmarked	Unmarked	Unmarked	Unmarked	Unmarked	Unmarked	Unmarked	Unmarked	Unmarked	Unmarked	Unmarked	Unmarked	Unmarked	Unmarked	Unmarked	Unmarked	Unmarked	Unmarked
NM_001005489	OR5B17	chr11	58125597	58126542	-	Unmarked	Unmarked	Unmarked	Unmarked	Unmarked	Unmarked	Unmarked	Unmarked	Unmarked	Unmarked	Unmarked	Unmarked	Unmarked	Unmarked	Unmarked	Unmarked	Unmarked	Unmarked	Unmarked	Unmarked
NM_001005490	OR6C74	chr12	55641071	55642010	+	Unmarked	Unmarked	Unmarked	Unmarked	Unmarked	Unmarked	Unmarked	Unmarked	Unmarked	Unmarked	Unmarked	Unmarked	Unmarked	Unmarked	Unmarked	Unmarked	Unmarked	Unmarked	Unmarked	Unmarked
NM_001005491	OR10AG1	chr11	55735033	55735939	-	Unmarked	Unmarked	Unmarked	Unmarked	Unmarked	Unmarked	Unmarked	Unmarked	Unmarked	Unmarked	Unmarked	Unmarked	Unmarked	Unmarked	Unmarked	Unmarked	Unmarked	Unmarked	Unmarked	Unmarked
NM_001005492	OR5J2	chr11	55944093	55945032	+	Unmarked	Unmarked	Unmarked	Unmarked	Unmarked	Unmarked	Unmarked	Unmarked	Unmarked	Unmarked	Unmarked	Unmarked	Unmarked	Unmarked	Unmarked	Unmarked	Unmarked	Unmarked	Unmarked	Unmarked
NM_001005493	OR6C6	chr12	55688071	55689016	-	Unmarked	Unmarked	Unmarked	Unmarked	Unmarked	Unmarked	Unmarked	Unmarked	Unmarked	Unmarked	Unmarked	Unmarked	Unmarked	Unmarked	Unmarked	Unmarked	Unmarked	Unmarked	Unmarked	Unmarked
NM_001005494	OR6C4	chr12	55945010	55945940	+	Unmarked	Unmarked	Unmarked	Unmarked	Unmarked	Unmarked	Unmarked	Unmarked	Unmarked	Unmarked	Unmarked	Unmarked	Unmarked	Unmarked	Unmarked	Unmarked	Unmarked	Unmarked	Unmarked	Unmarked
NM_001005495	OR2T3	chr1	248636651	248637608	+	Unmarked	Unmarked	Unmarked	Unmarked	Unmarked	Unmarked	Unmarked	Unmarked	Unmarked	Unmarked	Unmarked	Unmarked	Unmarked	Unmarked	Unmarked	Unmarked	Unmarked	Unmarked	Unmarked	Unmarked
NM_001005496	OR5D16	chr11	55606227	55607214	+	Unmarked	Unmarked	Unmarked	Unmarked	Unmarked	Unmarked	Unmarked	Unmarked	Unmarked	Unmarked	Unmarked	Unmarked	Unmarked	Unmarked	Unmarked	Unmarked	Unmarked	Unmarked	Unmarked	Unmarked
NM_001005497	OR6C75	chr12	55758894	55759833	+	Unmarked	Unmarked	Unmarked	Unmarked	Unmarked	Unmarked	Unmarked	Unmarked	Unmarked	Unmarked	Unmarked	Unmarked	Unmarked	Unmarked	Unmarked	Unmarked	Unmarked	Unmarked	Unmarked	Unmarked
NM_001005498	RHBDF2	chr17	74466974	74483991	-	Unmarked	Unmarked	Unmarked	Unmarked	Unmarked	Unmarked	Unmarked	Unmarked	Unmarked	Unmarked	Unmarked	Unmarked	Unmarked	Unmarked	Unmarked	Unmarked	Unmarked	Unmarked	Unmarked	Unmarked
NM_001005499	OR6C70	chr12	55862983	55863922	-	Unmarked	Unmarked	Unmarked	Unmarked	Unmarked	Unmarked	Unmarked	Unmarked	Unmarked	Unmarked	Unmarked	Unmarked	Unmarked	Unmarked	Unmarked	Unmarked	Unmarked	Unmarked	Unmarked	Unmarked
NM_001005500	OR4M1	chr14	20248481	20249423	+	Unmarked	Unmarked	Unmarked	Unmarked	Unmarked	Unmarked	Unmarked	Unmarked	Unmarked	Unmarked	Unmarked	Unmarked	Unmarked	Unmarked	Unmarked	Unmarked	Unmarked	Unmarked	Unmarked	Unmarked
NM_001005501	OR4K2	chr14	20344426	20345371	+	Unmarked	Unmarked	Unmarked	Unmarked	Unmarked	Unmarked	Unmarked	Unmarked	Unmarked	Unmarked	Unmarked	Unmarked	Unmarked	Unmarked	Unmarked	Unmarked	Unmarked	Unmarked	Unmarked	Unmarked
NM_001005502	CPM	chr12	69244955	69326979	-	Bivalent	Bivalent	Bivalent	H3K4me3-only	H3K4me3-only	Bivalent	H3K4me3-only	H3K4me3-only	Bivalent	H3K4me3-only	H3K4me3-only	H3K4me3-only	H3K4me3-only	H3K4me3-only	Bivalent	H3K4me3-only	H3K4me3-only	H3K4me3-only	H3K4me3-only	H3K4me3-only
NM_001005503	OR11G2	chr14	20665494	20666532	+	Unmarked	Unmarked	Unmarked	Unmarked	Unmarked	Unmarked	Unmarked	Unmarked	Unmarked	Unmarked	Unmarked	Unmarked	Unmarked	Unmarked	Unmarked	Unmarked	Unmarked	Unmarked	Unmarked	Unmarked
NM_001005504	OR4F21	chr8	116085	117024	-	Unmarked	Unmarked	Unmarked	Unmarked	Unmarked	Unmarked	Unmarked	Unmarked	Unmarked	Unmarked	Unmarked	Unmarked	Unmarked	Unmarked	Unmarked	Unmarked	Unmarked	Unmarked	Unmarked	Unmarked
NM_001005505	CACNA2D2	chr3	50400230	50540892	-	Bivalent	Bivalent	Bivalent	Bivalent	Bivalent	Bivalent	Bivalent	H3K27me3-only	H3K27me3-only	Bivalent	Bivalent	Bivalent	H3K4me3-only	H3K27me3-only	H3K27me3-only	H3K4me3-only	H3K4me3-only	H3K4me3-only	H3K4me3-only	H3K4me3-only
NM_001005512	OR4A47	chr11	48510344	48511274	+	Unmarked	Unmarked	Unmarked	Unmarked	Unmarked	Unmarked	Unmarked	Unmarked	Unmarked	Unmarked	Unmarked	Unmarked	Unmarked	Unmarked	Unmarked	Unmarked	Unmarked	Unmarked	Unmarked	Unmarked
NM_001005513	OR4C45	chr11	48366899	48373999	-	Unmarked	Unmarked	Unmarked	Unmarked	Unmarked	Unmarked	Unmarked	Unmarked	Unmarked	Unmarked	Unmarked	Unmarked	Unmarked	Unmarked	Unmarked	Unmarked	Unmarked	Unmarked	Unmarked	Unmarked
NM_001005514	OR5H14	chr3	97868229	97869162	+	Unmarked	Unmarked	Unmarked	Unmarked	Unmarked	Unmarked	Unmarked	Unmarked	Unmarked	Unmarked	Unmarked	Unmarked	Unmarked	Unmarked	Unmarked	Unmarked	Unmarked	Unmarked	Unmarked	Unmarked
NM_001005515	OR5H15	chr3	97887543	97888485	+	Unmarked	Unmarked	Unmarked	Unmarked	Unmarked	Unmarked	Unmarked	Unmarked	Unmarked	Unmarked	Unmarked	Unmarked	Unmarked	Unmarked	Unmarked	Unmarked	Unmarked	Unmarked	Unmarked	Unmarked
NM_001005516	OR5K3	chr3	98109509	98110475	+	Unmarked	Unmarked	Unmarked	Unmarked	Unmarked	Unmarked	Unmarked	Unmarked	Unmarked	Unmarked	Unmarked	Unmarked	Unmarked	Unmarked	Unmarked	Unmarked	Unmarked	Unmarked	Unmarked	Unmarked
NM_001005517	OR5K4	chr3	98072697	98073663	+	Unmarked	Unmarked	Unmarked	Unmarked	Unmarked	Unmarked	Unmarked	Unmarked	Unmarked	Unmarked	Unmarked	Unmarked	Unmarked	Unmarked	Unmarked	Unmarked	Unmarked	Unmarked	Unmarked	Unmarked
NM_001005518	OR6C65	chr12	55794312	55795251	+	Unmarked	Unmarked	Unmarked	Unmarked	Unmarked	Unmarked	Unmarked	Unmarked	Unmarked	Unmarked	Unmarked	Unmarked	Unmarked	Unmarked	Unmarked	Unmarked	Unmarked	Unmarked	Unmarked	Unmarked
NM_001005519	OR6C68	chr12	55886161	55887100	+	Unmarked	Unmarked	Unmarked	Unmarked	Unmarked	Unmarked	Unmarked	Unmarked	Unmarked	Unmarked	Unmarked	Unmarked	Unmarked	Unmarked	Unmarked	Unmarked	Unmarked	Unmarked	Unmarked	Unmarked
NM_001005522	OR2T8	chr1	248084319	248085258	+	Unmarked	Unmarked	Unmarked	Unmarked	Unmarked	Unmarked	Unmarked	Unmarked	Unmarked	Unmarked	Unmarked	Unmarked	Unmarked	Unmarked	Unmarked	Unmarked	Unmarked	Unmarked	Unmarked	Unmarked
NM_001005566	OR5B2	chr11	58189737	58190786	-	Unmarked	Unmarked	Unmarked	Unmarked	Unmarked	Unmarked	Unmarked	Unmarked	Unmarked	Unmarked	Unmarked	Unmarked	Unmarked	Unmarked	Unmarked	Unmarked	Unmarked	Unmarked	Unmarked	Unmarked
NM_001005610	EDA	chrX	68835910	69080895	+	H3K4me3-only	Bivalent	Bivalent	Bivalent	Bivalent	Bivalent	H3K4me3-only	H3K4me3-only	H3K4me3-only	H3K4me3-only	Bivalent	Bivalent	Bivalent	H3K4me3-only	Unmarked	H3K4me3-only	H3K4me3-only	H3K4me3-only	H3K4me3-only	H3K4me3-only
NM_001005619	ITGB4	chr17	73720775	73753899	+	Unmarked	Unmarked	H3K27me3-only	H3K27me3-only	H3K27me3-only	Unmarked	Unmarked	Unmarked	H3K4me3-only	Unmarked	Unmarked	H3K4me3-only	H3K4me3-only	H3K27me3-only	Unmarked	Unmarked	Unmarked	Unmarked	Unmarked	Unmarked
NM_001005738	FPR2	chr19	52264452	52273779	+	Unmarked	Unmarked	Unmarked	Unmarked	Unmarked	Unmarked	Unmarked	Unmarked	Unmarked	Unmarked	Unmarked	Unmarked	H3K27me3-only	Unmarked	Unmarked	Unmarked	Unmarked	Unmarked	Unmarked	Unmarked
NM_001005739	VPS54	chr2	64119666	64246214	-	H3K4me3-only	H3K4me3-only	H3K4me3-only	H3K4me3-only	H3K4me3-only	H3K4me3-only	H3K4me3-only	H3K4me3-only	H3K4me3-only	H3K4me3-only	H3K4me3-only	H3K4me3-only	H3K4me3-only	H3K4me3-only	H3K4me3-only	H3K4me3-only	H3K4me3-only	H3K4me3-only	H3K4me3-only	H3K4me3-only
NM_001005743	NUMB	chr14	73741917	73925286	-	H3K4me3-only	H3K4me3-only	H3K4me3-only	H3K4me3-only	H3K4me3-only	H3K4me3-only	H3K4me3-only	H3K4me3-only	H3K4me3-only	H3K4me3-only	H3K4me3-only	H3K4me3-only	H3K4me3-only	H3K4me3-only	H3K4me3-only	H3K4me3-only	H3K4me3-only	H3K4me3-only	H3K4me3-only	H3K4me3-only
NM_001005746	CACNB4	chr2	152689285	152955235	-	Bivalent	Bivalent	Bivalent	Bivalent	Bivalent	Bivalent	Bivalent	Bivalent	Bivalent	Bivalent	Bivalent	Bivalent	H3K4me3-only	Bivalent	Bivalent	H3K4me3-only	H3K4me3-only	H3K4me3-only	H3K4me3-only	H3K4me3-only
NM_001005747	CACNB4	chr2	152689285	152830485	-	Unmarked	Unmarked	H3K4me3-only	Unmarked	Unmarked	Unmarked	Unmarked	Unmarked	Unmarked	H3K4me3-only	Unmarked	Unmarked	Unmarked	H3K27me3-only	Unmarked	Unmarked	Unmarked	Unmarked	Unmarked	Unmarked
NM_001005751	FAM21A	chr10	51827683	51893269	+	H3K4me3-only	H3K4me3-only	H3K4me3-only	H3K4me3-only	H3K4me3-only	H3K4me3-only	H3K4me3-only	H3K4me3-only	H3K4me3-only	H3K4me3-only	H3K4me3-only	H3K4me3-only	H3K4me3-only	H3K4me3-only	H3K4me3-only	H3K4me3-only	H3K4me3-only	H3K4me3-only	H3K4me3-only	H3K4me3-only
NM_001005752	GJB3	chr1	35247910	35251967	+	Bivalent	Bivalent	H3K27me3-only	Bivalent	H3K27me3-only	H3K27me3-only	H3K27me3-only	H3K27me3-only	H3K4me3-only	H3K27me3-only	H3K27me3-only	H3K4me3-only	H3K4me3-only	H3K27me3-only	H3K27me3-only	Unmarked	H3K4me3-only	Unmarked	Unmarked	Unmarked
NM_001005781	SUMO1	chr2	203070902	203103322	-	H3K4me3-only	H3K4me3-only	H3K4me3-only	H3K4me3-only	H3K4me3-only	H3K4me3-only	H3K4me3-only	H3K4me3-only	H3K4me3-only	H3K4me3-only	H3K4me3-only	H3K4me3-only	H3K4me3-only	H3K4me3-only	H3K4me3-only	H3K4me3-only	H3K4me3-only	H3K4me3-only	H3K4me3-only	H3K4me3-only
NM_001005783	HAO2	chr1	119911401	119936751	+	Unmarked	Unmarked	Unmarked	Unmarked	Unmarked	Unmarked	Unmarked	Unmarked	Unmarked	Unmarked	Unmarked	Unmarked	Unmarked	Unmarked	Unmarked	Unmarked	Unmarked	Unmarked	Unmarked	Unmarked
NM_001005849	SUMO2	chr17	73163824	73179098	-	H3K4me3-only	H3K4me3-only	Bivalent	H3K4me3-only	H3K4me3-only	H3K4me3-only	H3K4me3-only	H3K4me3-only	H3K4me3-only	H3K4me3-only	H3K4me3-only	H3K4me3-only	H3K4me3-only	H3K4me3-only	H3K4me3-only	H3K4me3-only	H3K4me3-only	H3K4me3-only	H3K4me3-only	H3K4me3-only
NM_001005850	ZNF835	chr19	57174019	57183123	-	H3K4me3-only	Unmarked	H3K4me3-only	H3K4me3-only	H3K4me3-only	H3K4me3-only	H3K4me3-only	H3K4me3-only	Unmarked	Unmarked	H3K4me3-only	Unmarked	H3K4me3-only	Unmarked	Unmarked	H3K4me3-only	H3K4me3-only	H3K4me3-only	H3K4me3-only	H3K4me3-only
NM_001005851	ZNF780B	chr19	40534166	40562115	-	H3K4me3-only	H3K4me3-only	Bivalent	H3K4me3-only	H3K4me3-only	H3K4me3-only	H3K4me3-only	H3K4me3-only	H3K4me3-only	H3K4me3-only	H3K4me3-only	H3K4me3-only	H3K4me3-only	H3K4me3-only	H3K4me3-only	H3K4me3-only	H3K4me3-only	H3K4me3-only	H3K4me3-only	H3K4me3-only
NM_001005853	OR6B2	chr2	240968907	240969846	-	Unmarked	H3K27me3-only	Unmarked	Unmarked	Unmarked	Unmarked	Unmarked	Unmarked	Unmarked	H3K27me3-only	Unmarked	Unmarked	Unmarked	Unmarked	Unmarked	Unmarked	Unmarked	Unmarked	Unmarked	Unmarked
NM_001005855	ATP8B2	chr1	154298035	154310322	+	H3K4me3-only	H3K4me3-only	H3K4me3-only	Bivalent	Bivalent	H3K4me3-only	Bivalent	Bivalent	H3K4me3-only	H3K4me3-only	H3K4me3-only	H3K4me3-only	H3K4me3-only	H3K4me3-only	H3K4me3-only	H3K4me3-only	H3K4me3-only	H3K4me3-only	H3K4me3-only	H3K4me3-only
NM_001005862	ERBB2	chr17	37844392	37884915	+	H3K4me3-only	H3K4me3-only	Bivalent	H3K4me3-only	H3K4me3-only	H3K4me3-only	H3K4me3-only	H3K4me3-only	H3K4me3-only	H3K4me3-only	H3K4me3-only	H3K4me3-only	H3K4me3-only	H3K4me3-only	H3K4me3-only	H3K4me3-only	H3K4me3-only	H3K4me3-only	H3K4me3-only	H3K4me3-only
NM_001005914	SEMA3B	chr3	50305039	50314572	+	Unmarked	Unmarked	Bivalent	H3K4me3-only	H3K4me3-only	H3K27me3-only	H3K4me3-only	H3K4me3-only	Unmarked	H3K4me3-only	H3K27me3-only	Unmarked	H3K4me3-only	H3K4me3-only	Unmarked	H3K4me3-only	H3K4me3-only	H3K4me3-only	H3K4me3-only	H3K4me3-only
NM_001005915	ERBB3	chr12	56473891	56479401	+	H3K4me3-only	H3K4me3-only	Bivalent	Bivalent	H3K4me3-only	Bivalent	H3K4me3-only	H3K4me3-only	H3K4me3-only	H3K4me3-only	H3K4me3-only	H3K4me3-only	H3K4me3-only	Bivalent	H3K4me3-only	H3K4me3-only	H3K4me3-only	H3K4me3-only	H3K4me3-only	H3K4me3-only
NM_001005920	JMJD8	chr16	731666	734439	-	H3K4me3-only	H3K4me3-only	H3K4me3-only	H3K4me3-only	H3K4me3-only	H3K4me3-only	H3K4me3-only	H3K4me3-only	H3K4me3-only	H3K4me3-only	H3K4me3-only	H3K4me3-only	H3K4me3-only	H3K4me3-only	H3K4me3-only	H3K4me3-only	H3K4me3-only	H3K4me3-only	H3K4me3-only	H3K4me3-only
NM_001005922	KRTAP5-1	chr11	1605571	1606513	-	Unmarked	Unmarked	Unmarked	H3K27me3-only	H3K27me3-only	H3K27me3-only	Unmarked	Unmarked	Unmarked	H3K27me3-only	Unmarked	H3K27me3-only	H3K27me3-only	Unmarked	Unmarked	Unmarked	Unmarked	Unmarked	Unmarked	Unmarked
NM_001006109	C3orf37	chr3	128997816	129024135	+	H3K4me3-only	H3K4me3-only	H3K4me3-only	H3K4me3-only	H3K4me3-only	H3K4me3-only	H3K4me3-only	H3K4me3-only	H3K4me3-only	H3K4me3-only	H3K4me3-only	H3K4me3-only	H3K4me3-only	H3K4me3-only	H3K4me3-only	H3K4me3-only	H3K4me3-only	H3K4me3-only	H3K4me3-only	H3K4me3-only
NM_001006115	IP6K1	chr3	49761727	49823973	-	H3K4me3-only	H3K4me3-only	Bivalent	H3K4me3-only	H3K4me3-only	H3K4me3-only	H3K4me3-only	H3K4me3-only	H3K4me3-only	H3K4me3-only	H3K4me3-only	H3K4me3-only	H3K4me3-only	H3K4me3-only	H3K4me3-only	H3K4me3-only	H3K4me3-only	H3K4me3-only	H3K4me3-only	H3K4me3-only
NM_001006607	LRRC37A2	chr17	44590075	44633014	+	Unmarked	Unmarked	Unmarked	Unmarked	Unmarked	Unmarked	Unmarked	Unmarked	Unmarked	Unmarked	Unmarked	Unmarked	Unmarked	Unmarked	Unmarked	Unmarked	Unmarked	Unmarked	Unmarked	Unmarked
NM_001006610	SIAH1	chr16	48394445	48399784	-	H3K4me3-only	H3K4me3-only	H3K4me3-only	H3K4me3-only	H3K4me3-only	H3K4me3-only	H3K4me3-only	H3K4me3-only	H3K4me3-only	H3K4me3-only	H3K4me3-only	H3K4me3-only	H3K4me3-only	H3K4me3-only	H3K4me3-only	H3K4me3-only	H3K4me3-only	H3K4me3-only	H3K4me3-only	H3K4me3-only
NM_001006612	WBP5	chrX	102611379	102613397	+	H3K4me3-only	H3K4me3-only	H3K4me3-only	H3K4me3-only	H3K4me3-only	H3K4me3-only	H3K4me3-only	H3K4me3-only	H3K4me3-only	H3K4me3-only	H3K4me3-only	H3K4me3-only	Bivalent	H3K4me3-only	H3K4me3-only	H3K4me3-only	H3K4me3-only	H3K4me3-only	H3K4me3-only	H3K4me3-only
NM_001006616	TSPAN17	chr5	176074387	176086059	+	H3K4me3-only	H3K4me3-only	H3K4me3-only	H3K4me3-only	H3K4me3-only	H3K4me3-only	H3K4me3-only	H3K4me3-only	H3K4me3-only	H3K4me3-only	H3K4me3-only	H3K4me3-only	H3K4me3-only	H3K4me3-only	H3K4me3-only	H3K4me3-only	H3K4me3-only	H3K4me3-only	H3K4me3-only	H3K4me3-only
NM_001006619	MAPKAP1	chr9	128199672	128469513	-	H3K4me3-only	H3K4me3-only	H3K4me3-only	H3K4me3-only	H3K4me3-only	H3K4me3-only	H3K4me3-only	H3K4me3-only	H3K4me3-only	H3K4me3-only	H3K4me3-only	H3K4me3-only	H3K4me3-only	H3K4me3-only	H3K4me3-only	H3K4me3-only	H3K4me3-only	H3K4me3-only	H3K4me3-only	H3K4me3-only
NM_001006625	PDPN	chr1	13911966	13944452	+	H3K4me3-only	H3K4me3-only	H3K4me3-only	H3K27me3-only	Unmarked	H3K27me3-only	H3K27me3-only	H3K27me3-only	H3K4me3-only	H3K27me3-only	H3K27me3-only	Unmarked	H3K4me3-only	Unmarked	Unmarked	Unmarked	Unmarked	Unmarked	Unmarked	Unmarked
NM_001006626	CHRM2	chr7	136553868	136701771	+	Bivalent	Bivalent	Bivalent	Bivalent	H3K4me3-only	Bivalent	Bivalent	Bivalent	H3K27me3-only	H3K27me3-only	H3K27me3-only	H3K27me3-only	Bivalent	Bivalent	Bivalent	Unmarked	Unmarked	H3K4me3-only	H3K4me3-only	Unmarked
NM_001006628	CHRM2	chr7	136553992	136701771	+	Bivalent	Bivalent	Bivalent	Bivalent	H3K4me3-only	Bivalent	Bivalent	Bivalent	H3K27me3-only	H3K27me3-only	H3K27me3-only	H3K27me3-only	Bivalent	Bivalent	Bivalent	Unmarked	Unmarked	H3K4me3-only	H3K4me3-only	Unmarked
NM_001006629	CHRM2	chr7	136553983	136701771	+	Bivalent	Bivalent	Bivalent	Bivalent	H3K4me3-only	Bivalent	Bivalent	Bivalent	H3K27me3-only	H3K27me3-only	H3K27me3-only	H3K27me3-only	Bivalent	Bivalent	Bivalent	Unmarked	Unmarked	H3K4me3-only	H3K4me3-only	Unmarked
NM_001006630	CHRM2	chr7	136553398	136701771	+	Bivalent	Bivalent	Bivalent	Bivalent	H3K4me3-only	Bivalent	Bivalent	Bivalent	H3K27me3-only	H3K27me3-only	H3K27me3-only	H3K27me3-only	Bivalent	Bivalent	Bivalent	Unmarked	Unmarked	H3K4me3-only	Unmarked	Unmarked
NM_001006631	CHRM2	chr7	136553831	136701771	+	Bivalent	Bivalent	Bivalent	Bivalent	H3K4me3-only	Bivalent	Bivalent	Bivalent	H3K27me3-only	H3K27me3-only	H3K27me3-only	H3K27me3-only	Bivalent	Bivalent	Bivalent	Unmarked	Unmarked	H3K4me3-only	H3K4me3-only	Unmarked
NM_001006636	GTDC1	chr2	144703580	145052060	-	Unmarked	Unmarked	Unmarked	Unmarked	Unmarked	Unmarked	Unmarked	Unmarked	Unmarked	Unmarked	Unmarked	Unmarked	Unmarked	Unmarked	Unmarked	Unmarked	Unmarked	Unmarked	Unmarked	Unmarked
NM_001006638	RAB37	chr17	72733355	72743474	+	H3K4me3-only	Bivalent	Bivalent	Bivalent	Bivalent	H3K4me3-only	Bivalent	H3K4me3-only	Bivalent	Bivalent	H3K4me3-only	H3K27me3-only	Bivalent	H3K27me3-only	H3K27me3-only	H3K4me3-only	H3K4me3-only	Unmarked	Unmarked	H3K4me3-only
NM_001006639	TCEAL1	chrX	102883891	102885876	+	H3K4me3-only	H3K4me3-only	H3K4me3-only	H3K4me3-only	H3K4me3-only	H3K4me3-only	H3K4me3-only	H3K4me3-only	H3K4me3-only	H3K4me3-only	H3K4me3-only	H3K4me3-only	Bivalent	H3K4me3-only	H3K4me3-only	H3K4me3-only	H3K4me3-only	H3K4me3-only	H3K4me3-only	H3K4me3-only
NM_001006640	TCEAL1	chrX	102883647	102885876	+	H3K4me3-only	H3K4me3-only	H3K4me3-only	H3K4me3-only	H3K4me3-only	H3K4me3-only	H3K4me3-only	H3K4me3-only	H3K4me3-only	H3K4me3-only	H3K4me3-only	H3K4me3-only	Bivalent	H3K4me3-only	H3K4me3-only	H3K4me3-only	H3K4me3-only	H3K4me3-only	H3K4me3-only	H3K4me3-only
NM_001006641	SLC25A25	chr9	130830478	130871537	+	H3K4me3-only	H3K4me3-only	H3K4me3-only	H3K4me3-only	H3K4me3-only	H3K4me3-only	H3K4me3-only	H3K4me3-only	H3K4me3-only	H3K4me3-only	H3K4me3-only	H3K4me3-only	H3K4me3-only	H3K4me3-only	H3K4me3-only	H3K4me3-only	H3K4me3-only	H3K4me3-only	H3K4me3-only	H3K4me3-only
NM_001006655	FAM149A	chr4	187070326	187093817	+	Unmarked	Unmarked	Unmarked	Unmarked	Unmarked	H3K27me3-only	Unmarked	Unmarked	H3K27me3-only	Unmarked	Unmarked	Unmarked	Unmarked	Unmarked	Unmarked	Unmarked	Unmarked	Unmarked	Unmarked	Unmarked
NM_001006656	ZNF473	chr19	50529211	50552031	+	H3K4me3-only	H3K4me3-only	H3K4me3-only	H3K4me3-only	H3K4me3-only	H3K4me3-only	H3K4me3-only	H3K4me3-only	H3K4me3-only	H3K4me3-only	H3K4me3-only	H3K4me3-only	H3K4me3-only	H3K4me3-only	H3K4me3-only	H3K4me3-only	H3K4me3-only	H3K4me3-only	H3K4me3-only	H3K4me3-only
NM_001006657	WDR35	chr2	20110028	20189884	-	H3K4me3-only	H3K4me3-only	H3K4me3-only	H3K4me3-only	H3K4me3-only	H3K4me3-only	H3K4me3-only	H3K4me3-only	H3K4me3-only	H3K4me3-only	H3K4me3-only	H3K4me3-only	H3K4me3-only	H3K4me3-only	H3K4me3-only	H3K4me3-only	H3K4me3-only	H3K4me3-only	H3K4me3-only	H3K4me3-only
NM_001006665	RPS6KA1	chr1	26872342	26901520	+	Unmarked	Unmarked	Unmarked	H3K27me3-only	Bivalent	H3K4me3-only	H3K4me3-only	Unmarked	Unmarked	H3K4me3-only	H3K4me3-only	Unmarked	Unmarked	Unmarked	Unmarked	Unmarked	H3K4me3-only	Unmarked	H3K4me3-only	Unmarked
NM_001006666	APOBEC3F	chr22	39436672	39440428	+	H3K4me3-only	H3K4me3-only	H3K4me3-only	H3K4me3-only	H3K4me3-only	H3K4me3-only	H3K4me3-only	H3K4me3-only	H3K4me3-only	H3K4me3-only	H3K4me3-only	H3K4me3-only	H3K4me3-only	H3K4me3-only	H3K4me3-only	H3K4me3-only	H3K4me3-only	H3K4me3-only	H3K4me3-only	H3K4me3-only
NM_001006682	SPIN2B	chrX	57146114	57147979	-	H3K4me3-only	H3K4me3-only	H3K4me3-only	H3K4me3-only	H3K4me3-only	H3K4me3-only	H3K4me3-only	H3K4me3-only	H3K4me3-only	H3K4me3-only	H3K4me3-only	H3K4me3-only	H3K4me3-only	H3K4me3-only	H3K4me3-only	H3K4me3-only	H3K4me3-only	H3K4me3-only	H3K4me3-only	H3K4me3-only
NM_001006684	TCEAL8	chrX	102507922	102510121	-	H3K4me3-only	H3K4me3-only	H3K4me3-only	H3K4me3-only	H3K4me3-only	H3K4me3-only	H3K4me3-only	H3K4me3-only	H3K4me3-only	H3K4me3-only	H3K4me3-only	H3K4me3-only	Bivalent	H3K4me3-only	H3K4me3-only	H3K4me3-only	H3K4me3-only	H3K4me3-only	H3K4me3-only	H3K4me3-only
NM_001006932	RPS6KA2	chr6	166822853	167275771	-	H3K4me3-only	Bivalent	H3K4me3-only	Bivalent	Bivalent	Bivalent	Bivalent	Bivalent	Bivalent	Bivalent	Bivalent	Bivalent	H3K4me3-only	Bivalent	Bivalent	H3K4me3-only	H3K4me3-only	H3K4me3-only	H3K4me3-only	H3K4me3-only
NM_001006933	TCEAL3	chrX	102862833	102864855	+	H3K4me3-only	H3K4me3-only	H3K4me3-only	H3K4me3-only	H3K4me3-only	H3K4me3-only	H3K4me3-only	H3K4me3-only	Bivalent	H3K4me3-only	H3K4me3-only	Bivalent	Bivalent	H3K4me3-only	H3K4me3-only	H3K4me3-only	H3K4me3-only	H3K4me3-only	H3K4me3-only	H3K4me3-only
NM_001006938	TCEAL6	chrX	101394932	101397388	-	Unmarked	Unmarked	H3K4me3-only	Unmarked	Unmarked	H3K27me3-only	H3K27me3-only	Unmarked	H3K27me3-only	Unmarked	Unmarked	Unmarked	Bivalent	Unmarked	Unmarked	Unmarked	Unmarked	Unmarked	Unmarked	Unmarked
NM_001006939	LRRC18	chr10	50117528	50122280	-	Unmarked	Unmarked	Unmarked	Unmarked	H3K27me3-only	Unmarked	Unmarked	Unmarked	Unmarked	H3K27me3-only	Unmarked	Unmarked	Unmarked	H3K27me3-only	Unmarked	Unmarked	Unmarked	Unmarked	Unmarked	Unmarked
NM_001006941	ALG3	chr3	183960116	183967313	-	H3K4me3-only	H3K4me3-only	H3K4me3-only	H3K4me3-only	H3K4me3-only	H3K4me3-only	H3K4me3-only	H3K4me3-only	H3K4me3-only	H3K4me3-only	H3K4me3-only	H3K4me3-only	H3K4me3-only	H3K4me3-only	H3K4me3-only	H3K4me3-only	H3K4me3-only	H3K4me3-only	H3K4me3-only	H3K4me3-only
NM_001006943	EPHA8	chr1	22890003	22916112	+	Bivalent	Bivalent	Bivalent	H3K27me3-only	H3K27me3-only	Bivalent	H3K27me3-only	H3K27me3-only	H3K27me3-only	Bivalent	H3K27me3-only	H3K27me3-only	Bivalent	H3K27me3-only	H3K27me3-only	H3K4me3-only	Unmarked	Unmarked	Unmarked	H3K4me3-only
NM_001006944	RPS6KA4	chr11	64126624	64139687	+	H3K4me3-only	H3K4me3-only	Bivalent	H3K4me3-only	H3K4me3-only	H3K4me3-only	H3K4me3-only	H3K4me3-only	H3K4me3-only	H3K4me3-only	H3K4me3-only	H3K4me3-only	H3K4me3-only	H3K4me3-only	H3K4me3-only	H3K4me3-only	H3K4me3-only	H3K4me3-only	H3K4me3-only	H3K4me3-only
NM_001006945	LRIF1	chr1	111489811	111506566	-	H3K4me3-only	H3K4me3-only	Bivalent	H3K4me3-only	H3K4me3-only	H3K4me3-only	H3K4me3-only	H3K4me3-only	H3K4me3-only	H3K4me3-only	H3K4me3-only	H3K4me3-only	H3K4me3-only	H3K4me3-only	H3K4me3-only	H3K4me3-only	H3K4me3-only	H3K4me3-only	H3K4me3-only	H3K4me3-only
NM_001006946	SDC1	chr2	20400557	20425194	-	H3K4me3-only	H3K4me3-only	H3K4me3-only	Bivalent	Bivalent	Bivalent	H3K4me3-only	H3K4me3-only	H3K4me3-only	H3K4me3-only	Bivalent	H3K4me3-only	H3K4me3-only	H3K4me3-only	H3K4me3-only	H3K4me3-only	H3K4me3-only	H3K4me3-only	H3K4me3-only	H3K4me3-only
NM_001006947	UHRF1BP1L	chr12	100463685	100536642	-	H3K4me3-only	H3K4me3-only	H3K4me3-only	H3K4me3-only	H3K4me3-only	H3K4me3-only	H3K4me3-only	H3K4me3-only	H3K4me3-only	H3K4me3-only	H3K4me3-only	H3K4me3-only	H3K4me3-only	H3K4me3-only	H3K4me3-only	H3K4me3-only	H3K4me3-only	H3K4me3-only	H3K4me3-only	H3K4me3-only
NM_001007	RPS4X	chrX	71492452	71497141	-	H3K4me3-only	H3K4me3-only	H3K4me3-only	H3K4me3-only	H3K4me3-only	H3K4me3-only	H3K4me3-only	H3K4me3-only	H3K4me3-only	H3K4me3-only	H3K4me3-only	H3K4me3-only	H3K4me3-only	H3K4me3-only	H3K4me3-only	H3K4me3-only	H3K4me3-only	H3K4me3-only	H3K4me3-only	H3K4me3-only
NM_001007023	DIO2	chr14	80663867	80677864	-	Unmarked	Unmarked	Unmarked	H3K4me3-only	H3K4me3-only	H3K27me3-only	Unmarked	Unmarked	H3K4me3-only	Unmarked	Unmarked	Unmarked	H3K4me3-only	H3K4me3-only	Unmarked	Unmarked	Unmarked	Unmarked	H3K4me3-only	Unmarked
NM_001007026	ATN1	chr12	7033625	7051484	+	H3K4me3-only	Unmarked	H3K4me3-only	H3K4me3-only	H3K4me3-only	H3K4me3-only	Unmarked	Unmarked	H3K4me3-only	H3K4me3-only	Unmarked	Unmarked	H3K4me3-only	H3K4me3-only	Unmarked	Unmarked	Unmarked	Unmarked	Unmarked	Unmarked
NM_001007033	CLEC6A	chr12	8608590	8630926	+	Unmarked	Unmarked	Unmarked	Unmarked	Unmarked	Unmarked	Unmarked	Unmarked	Unmarked	Unmarked	Unmarked	Unmarked	Unmarked	Unmarked	Unmarked	Unmarked	Unmarked	Unmarked	Unmarked	Unmarked
NM_001007068	SDCBP	chr8	59465727	59495419	+	H3K4me3-only	H3K4me3-only	H3K4me3-only	H3K4me3-only	H3K4me3-only	H3K4me3-only	H3K4me3-only	H3K4me3-only	H3K4me3-only	H3K4me3-only	H3K4me3-only	H3K4me3-only	H3K4me3-only	H3K4me3-only	H3K4me3-only	H3K4me3-only	H3K4me3-only	H3K4me3-only	H3K4me3-only	H3K4me3-only
NM_001007072	ZSCAN2	chr15	85144248	85159841	+	H3K4me3-only	H3K4me3-only	Bivalent	H3K4me3-only	H3K4me3-only	H3K4me3-only	H3K4me3-only	H3K4me3-only	H3K4me3-only	H3K4me3-only	H3K4me3-only	H3K4me3-only	H3K4me3-only	H3K4me3-only	H3K4me3-only	H3K4me3-only	H3K4me3-only	H3K4me3-only	H3K4me3-only	H3K4me3-only
NM_001007074	RPL32	chr3	12876443	12881949	-	H3K4me3-only	H3K4me3-only	H3K4me3-only	H3K4me3-only	H3K4me3-only	H3K4me3-only	H3K4me3-only	H3K4me3-only	H3K4me3-only	H3K4me3-only	H3K4me3-only	H3K4me3-only	H3K4me3-only	H3K4me3-only	H3K4me3-only	H3K4me3-only	H3K4me3-only	H3K4me3-only	H3K4me3-only	H3K4me3-only
NM_001007075	KLHL5	chr4	39046450	39127853	+	H3K4me3-only	H3K4me3-only	Bivalent	H3K4me3-only	H3K4me3-only	H3K4me3-only	H3K4me3-only	H3K4me3-only	H3K4me3-only	H3K4me3-only	H3K4me3-only	H3K4me3-only	H3K4me3-only	H3K4me3-only	H3K4me3-only	H3K4me3-only	H3K4me3-only	H3K4me3-only	H3K4me3-only	H3K4me3-only
NM_001007089	RESP18	chr2	220192130	220197899	-	H3K27me3-only	H3K27me3-only	H3K27me3-only	H3K27me3-only	H3K27me3-only	H3K27me3-only	H3K27me3-only	H3K27me3-only	H3K27me3-only	H3K27me3-only	H3K27me3-only	H3K27me3-only	H3K27me3-only	H3K27me3-only	H3K27me3-only	Unmarked	Unmarked	Unmarked	Unmarked	Unmarked
NM_001007090	C8orf48	chr8	13424351	13425797	+	H3K4me3-only	Bivalent	H3K4me3-only	H3K4me3-only	H3K4me3-only	H3K4me3-only	H3K4me3-only	H3K4me3-only	H3K4me3-only	H3K4me3-only	Unmarked	H3K4me3-only	H3K4me3-only	H3K4me3-only	H3K4me3-only	H3K4me3-only	H3K4me3-only	H3K4me3-only	H3K4me3-only	H3K4me3-only
NM_001007097	NTRK2	chr9	87284625	87430621	+	Bivalent	Bivalent	Bivalent	Bivalent	Bivalent	Bivalent	Bivalent	H3K27me3-only	Bivalent	Bivalent	H3K27me3-only	Bivalent	H3K4me3-only	Bivalent	Bivalent	H3K4me3-only	H3K4me3-only	H3K4me3-only	H3K4me3-only	H3K4me3-only
NM_001007100	SCP2	chr1	53480609	53517289	+	H3K4me3-only	H3K4me3-only	H3K4me3-only	H3K4me3-only	H3K4me3-only	H3K4me3-only	H3K4me3-only	H3K4me3-only	H3K4me3-only	H3K4me3-only	H3K4me3-only	H3K4me3-only	H3K4me3-only	H3K4me3-only	H3K4me3-only	H3K4me3-only	H3K4me3-only	H3K4me3-only	H3K4me3-only	H3K4me3-only
NM_001007101	ZNF484	chr9	95607312	95640320	-	H3K4me3-only	H3K4me3-only	H3K4me3-only	H3K4me3-only	H3K4me3-only	H3K4me3-only	H3K4me3-only	H3K4me3-only	H3K4me3-only	H3K4me3-only	H3K4me3-only	H3K4me3-only	H3K4me3-only	H3K4me3-only	H3K4me3-only	H3K4me3-only	H3K4me3-only	H3K4me3-only	H3K4me3-only	H3K4me3-only
NM_001007102	L3MBTL3	chr6	130339727	130462594	+	H3K4me3-only	Bivalent	Bivalent	H3K4me3-only	H3K4me3-only	H3K4me3-only	H3K4me3-only	H3K4me3-only	H3K4me3-only	H3K4me3-only	H3K4me3-only	H3K4me3-only	H3K4me3-only	H3K4me3-only	H3K4me3-only	H3K4me3-only	H3K4me3-only	H3K4me3-only	H3K4me3-only	H3K4me3-only
NM_001007122	FSD2	chr15	83428023	83474806	-	Unmarked	Unmarked	Unmarked	Unmarked	Unmarked	Unmarked	Unmarked	Unmarked	Unmarked	Unmarked	Unmarked	Unmarked	Unmarked	Unmarked	Unmarked	Unmarked	Unmarked	H3K4me3-only	Unmarked	Unmarked
NM_001007125	C20orf201	chr20	62714732	62715712	-	Bivalent	Bivalent	Bivalent	Bivalent	Bivalent	H3K4me3-only	H3K27me3-only	H3K27me3-only	Bivalent	Bivalent	H3K4me3-only	Bivalent	H3K4me3-only	H3K27me3-only	H3K27me3-only	H3K4me3-only	H3K4me3-only	Unmarked	H3K4me3-only	H3K4me3-only
NM_001007139	IGF2	chr11	2150346	2170833	-	H3K27me3-only	H3K27me3-only	H3K27me3-only	H3K27me3-only	H3K27me3-only	H3K27me3-only	H3K27me3-only	H3K27me3-only	H3K27me3-only	H3K27me3-only	H3K27me3-only	H3K27me3-only	H3K27me3-only	H3K27me3-only	H3K27me3-only	Unmarked	Unmarked	Unmarked	Unmarked	Unmarked
NM_001007176	C8orf22	chr8	49984899	49988642	+	Unmarked	Unmarked	Unmarked	Unmarked	Unmarked	Unmarked	Unmarked	Unmarked	Unmarked	Unmarked	Unmarked	Unmarked	Unmarked	Unmarked	Unmarked	Unmarked	Unmarked	Unmarked	Unmarked	Unmarked
NM_001007188	DEPDC5	chr22	32150008	32211977	+	H3K4me3-only	H3K4me3-only	H3K4me3-only	H3K4me3-only	H3K4me3-only	H3K4me3-only	H3K4me3-only	H3K4me3-only	H3K4me3-only	H3K4me3-only	H3K4me3-only	H3K4me3-only	H3K4me3-only	H3K4me3-only	H3K4me3-only	H3K4me3-only	H3K4me3-only	H3K4me3-only	H3K4me3-only	H3K4me3-only
NM_001007189	IGIP	chr5	139505520	139508391	+	Unmarked	Unmarked	Unmarked	Unmarked	Unmarked	Unmarked	Unmarked	Unmarked	Unmarked	Unmarked	Unmarked	Unmarked	Unmarked	Unmarked	Unmarked	Unmarked	Unmarked	Unmarked	Unmarked	Unmarked
NM_001007214	CACYBP	chr1	174968570	174981163	+	H3K4me3-only	H3K4me3-only	H3K4me3-only	H3K4me3-only	H3K4me3-only	H3K4me3-only	H3K4me3-only	H3K4me3-only	H3K4me3-only	H3K4me3-only	H3K4me3-only	H3K4me3-only	H3K4me3-only	H3K4me3-only	H3K4me3-only	H3K4me3-only	H3K4me3-only	H3K4me3-only	Unmarked	H3K4me3-only
NM_001007226	SPOP	chr17	47676245	47755525	-	H3K4me3-only	H3K4me3-only	H3K4me3-only	H3K4me3-only	H3K4me3-only	H3K4me3-only	H3K4me3-only	H3K4me3-only	H3K4me3-only	H3K4me3-only	H3K4me3-only	H3K4me3-only	H3K4me3-only	H3K4me3-only	H3K4me3-only	H3K4me3-only	H3K4me3-only	H3K4me3-only	H3K4me3-only	H3K4me3-only
NM_001007231	ARHGAP25	chr2	68961912	69053957	+	Unmarked	Unmarked	Unmarked	H3K27me3-only	Unmarked	H3K4me3-only	H3K4me3-only	Unmarked	Unmarked	Unmarked	H3K4me3-only	Unmarked	Unmarked	Unmarked	H3K27me3-only	Unmarked	H3K4me3-only	Unmarked	Unmarked	Unmarked
NM_001007232	CARD17	chr11	104963195	104972158	-	Unmarked	Unmarked	Unmarked	Unmarked	Unmarked	Unmarked	Unmarked	Unmarked	Unmarked	Unmarked	Unmarked	Unmarked	Unmarked	Unmarked	Unmarked	Unmarked	Unmarked	Unmarked	Unmarked	Unmarked
NM_001007237	IGSF3	chr1	117117019	117210377	-	H3K4me3-only	Bivalent	Bivalent	Bivalent	Bivalent	Bivalent	H3K4me3-only	H3K4me3-only	H3K4me3-only	H3K4me3-only	Bivalent	H3K4me3-only	H3K4me3-only	Bivalent	Bivalent	H3K4me3-only	H3K4me3-only	H3K4me3-only	H3K4me3-only	H3K4me3-only
NM_001007239	METTL13	chr1	171750760	171766856	+	H3K4me3-only	H3K4me3-only	H3K4me3-only	H3K4me3-only	H3K4me3-only	H3K4me3-only	H3K4me3-only	H3K4me3-only	H3K4me3-only	H3K4me3-only	H3K4me3-only	H3K4me3-only	H3K4me3-only	H3K4me3-only	H3K4me3-only	H3K4me3-only	H3K4me3-only	H3K4me3-only	H3K4me3-only	H3K4me3-only
NM_001007240	GP2	chr16	20321810	20338835	-	Unmarked	Unmarked	Unmarked	Unmarked	Unmarked	Unmarked	Unmarked	Unmarked	Unmarked	Unmarked	Unmarked	Unmarked	Unmarked	Unmarked	Unmarked	Unmarked	Unmarked	Unmarked	Unmarked	H3K4me3-only
NM_001007245	IFRD1	chr7	112063198	112117258	+	Unmarked	Unmarked	Unmarked	Unmarked	Unmarked	Unmarked	Unmarked	Unmarked	Unmarked	Unmarked	Unmarked	Unmarked	Unmarked	Unmarked	Unmarked	Unmarked	Unmarked	Unmarked	Unmarked	Unmarked
NM_001007248	ZNF599	chr19	35248978	35264134	-	H3K4me3-only	H3K4me3-only	H3K4me3-only	H3K4me3-only	H3K4me3-only	H3K4me3-only	H3K4me3-only	H3K4me3-only	H3K4me3-only	H3K4me3-only	H3K4me3-only	H3K4me3-only	H3K4me3-only	H3K4me3-only	H3K4me3-only	H3K4me3-only	H3K4me3-only	H3K4me3-only	H3K4me3-only	H3K4me3-only
NM_001007249	OR8G2	chr11	124095397	124096312	+	Unmarked	Unmarked	Unmarked	Unmarked	Unmarked	Unmarked	Unmarked	Unmarked	Unmarked	Unmarked	Unmarked	Unmarked	Unmarked	Unmarked	Unmarked	Unmarked	Unmarked	Unmarked	Unmarked	Unmarked
NM_001007253	ERV3-1	chr7	64450732	64467124	-	H3K4me3-only	H3K4me3-only	H3K4me3-only	H3K4me3-only	H3K4me3-only	H3K4me3-only	H3K4me3-only	H3K4me3-only	H3K4me3-only	H3K4me3-only	H3K4me3-only	H3K4me3-only	H3K4me3-only	H3K4me3-only	H3K4me3-only	H3K4me3-only	H3K4me3-only	H3K4me3-only	H3K4me3-only	H3K4me3-only
NM_001007257	PRDM2	chr1	14075875	14114574	+	H3K4me3-only	Bivalent	H3K4me3-only	H3K4me3-only	H3K4me3-only	H3K4me3-only	H3K4me3-only	H3K4me3-only	H3K4me3-only	H3K4me3-only	H3K4me3-only	H3K4me3-only	H3K4me3-only	H3K4me3-only	H3K4me3-only	H3K4me3-only	H3K4me3-only	H3K4me3-only	H3K4me3-only	H3K4me3-only
NM_001007270	GEMIN7	chr19	45582517	45594782	+	H3K4me3-only	H3K4me3-only	Bivalent	H3K4me3-only	H3K4me3-only	H3K4me3-only	H3K4me3-only	H3K4me3-only	H3K4me3-only	H3K4me3-only	H3K4me3-only	H3K4me3-only	H3K4me3-only	H3K4me3-only	H3K4me3-only	H3K4me3-only	H3K4me3-only	H3K4me3-only	H3K4me3-only	H3K4me3-only
NM_001007272	DUSP13	chr10	76854189	76868970	-	Unmarked	Unmarked	Unmarked	Unmarked	Unmarked	Unmarked	Unmarked	Unmarked	Unmarked	Unmarked	Unmarked	Unmarked	Unmarked	Unmarked	Unmarked	Unmarked	Unmarked	Unmarked	Unmarked	Unmarked
NM_001007277	EI24	chr11	125439297	125454575	+	H3K4me3-only	H3K4me3-only	H3K4me3-only	H3K4me3-only	H3K4me3-only	H3K4me3-only	H3K4me3-only	H3K4me3-only	H3K4me3-only	H3K4me3-only	H3K4me3-only	H3K4me3-only	H3K4me3-only	H3K4me3-only	H3K4me3-only	H3K4me3-only	H3K4me3-only	H3K4me3-only	H3K4me3-only	H3K4me3-only
NM_001007464	RWDD1	chr6	116892582	116914436	+	H3K4me3-only	H3K4me3-only	H3K4me3-only	H3K4me3-only	H3K4me3-only	H3K4me3-only	H3K4me3-only	H3K4me3-only	H3K4me3-only	H3K4me3-only	H3K4me3-only	H3K4me3-only	H3K4me3-only	H3K4me3-only	H3K4me3-only	H3K4me3-only	H3K4me3-only	H3K4me3-only	H3K4me3-only	H3K4me3-only
NM_001007468	SMARCB1	chr22	24129149	24176705	+	H3K4me3-only	H3K4me3-only	H3K4me3-only	H3K4me3-only	H3K4me3-only	H3K4me3-only	H3K4me3-only	H3K4me3-only	H3K4me3-only	H3K4me3-only	H3K4me3-only	H3K4me3-only	H3K4me3-only	H3K4me3-only	H3K4me3-only	H3K4me3-only	H3K4me3-only	H3K4me3-only	H3K4me3-only	H3K4me3-only
NM_001007469	HCST	chr19	36393381	36395173	+	Unmarked	Unmarked	H3K27me3-only	H3K4me3-only	H3K4me3-only	H3K4me3-only	H3K27me3-only	H3K27me3-only	Unmarked	Unmarked	H3K4me3-only	Unmarked	Unmarked	Unmarked	Unmarked	Unmarked	H3K4me3-only	Unmarked	Unmarked	Unmarked
NM_001007471	TRPM3	chr9	73149965	73736514	-	H3K4me3-only	H3K4me3-only	H3K4me3-only	Bivalent	Unmarked	H3K4me3-only	Unmarked	H3K4me3-only	H3K27me3-only	H3K4me3-only	Unmarked	H3K27me3-only	H3K27me3-only	Unmarked	H3K27me3-only	Unmarked	Unmarked	Unmarked	Unmarked	Unmarked
NM_001007525	NWD1	chr19	16830786	16928774	+	Unmarked	Unmarked	Unmarked	H3K27me3-only	H3K27me3-only	Unmarked	Unmarked	Unmarked	Unmarked	Unmarked	Unmarked	H3K4me3-only	Unmarked	Unmarked	Unmarked	H3K4me3-only	Unmarked	Unmarked	Unmarked	Unmarked
NM_001007527	LMBRD2	chr5	36103413	36152015	-	H3K4me3-only	H3K4me3-only	H3K4me3-only	H3K4me3-only	H3K4me3-only	H3K4me3-only	H3K4me3-only	H3K4me3-only	H3K4me3-only	H3K4me3-only	H3K4me3-only	H3K4me3-only	H3K4me3-only	H3K4me3-only	H3K4me3-only	H3K4me3-only	H3K4me3-only	H3K4me3-only	H3K4me3-only	H3K4me3-only
NM_001007530	CDRT15	chr17	14139172	14140150	-	Unmarked	Unmarked	Unmarked	Unmarked	Unmarked	Unmarked	Unmarked	Unmarked	Unmarked	Unmarked	Unmarked	Unmarked	Unmarked	Unmarked	Unmarked	Unmarked	Unmarked	Unmarked	Unmarked	Unmarked
NM_001007531	NKAPL	chr6	28227074	28228736	+	H3K4me3-only	Unmarked	Bivalent	H3K4me3-only	H3K4me3-only	H3K4me3-only	Bivalent	Bivalent	H3K4me3-only	H3K4me3-only	Unmarked	H3K4me3-only	H3K4me3-only	H3K4me3-only	H3K4me3-only	H3K4me3-only	H3K4me3-only	H3K4me3-only	H3K4me3-only	H3K4me3-only
NM_001007532	STH	chr17	44076615	44077060	+	Unmarked	Unmarked	Unmarked	H3K27me3-only	H3K27me3-only	Unmarked	Unmarked	Unmarked	H3K27me3-only	Unmarked	Unmarked	Unmarked	Unmarked	Unmarked	Unmarked	Unmarked	Unmarked	Unmarked	Unmarked	Unmarked
NM_001007533	PPP1R27	chr17	79791367	79792926	-	Unmarked	Unmarked	Unmarked	H3K4me3-only	H3K4me3-only	Unmarked	Unmarked	Unmarked	Unmarked	H3K4me3-only	Unmarked	Unmarked	Unmarked	Unmarked	Unmarked	Unmarked	Unmarked	Unmarked	Unmarked	Unmarked
NM_001007534	C3orf56	chr3	126911973	126917027	+	Unmarked	Unmarked	H3K27me3-only	H3K27me3-only	Unmarked	Unmarked	Unmarked	Unmarked	Unmarked	H3K27me3-only	Unmarked	Unmarked	Unmarked	Unmarked	Unmarked	Unmarked	Unmarked	Unmarked	Unmarked	Unmarked
NM_001007537	C1QTNF9B	chr13	24465427	24471125	-	Unmarked	Unmarked	Unmarked	Unmarked	Unmarked	Unmarked	Unmarked	Unmarked	Unmarked	Unmarked	Unmarked	Unmarked	Unmarked	Unmarked	Unmarked	Unmarked	Unmarked	Unmarked	Unmarked	Unmarked
NM_001007538	SHISA2	chr13	26618734	26625198	-	Bivalent	Bivalent	Bivalent	Bivalent	Bivalent	Bivalent	Bivalent	Bivalent	Bivalent	Bivalent	Bivalent	Bivalent	Bivalent	H3K27me3-only	H3K4me3-only	Unmarked	H3K4me3-only	Unmarked	Unmarked	H3K4me3-only
NM_001007540	CDHR4	chr3	49828166	49837254	-	Unmarked	H3K27me3-only	H3K27me3-only	Unmarked	H3K4me3-only	Unmarked	Unmarked	Unmarked	Unmarked	Unmarked	Unmarked	Unmarked	Unmarked	Unmarked	Unmarked	Unmarked	Unmarked	Unmarked	Unmarked	Unmarked
NM_001007544	C1orf186	chr1	206238881	206288236	-	Unmarked	Unmarked	Unmarked	H3K27me3-only	Unmarked	Unmarked	Unmarked	Unmarked	Unmarked	Unmarked	Unmarked	Unmarked	Unmarked	Unmarked	Unmarked	Unmarked	Unmarked	Unmarked	Unmarked	Unmarked
NM_001007559	SS18	chr18	23596216	23670611	-	H3K4me3-only	H3K4me3-only	H3K4me3-only	H3K4me3-only	H3K4me3-only	H3K4me3-only	H3K4me3-only	H3K4me3-only	H3K4me3-only	H3K4me3-only	H3K4me3-only	H3K4me3-only	H3K4me3-only	H3K4me3-only	H3K4me3-only	H3K4me3-only	H3K4me3-only	H3K4me3-only	H3K4me3-only	H3K4me3-only
NM_001007561	IRGQ	chr19	44088518	44100287	-	H3K4me3-only	H3K4me3-only	H3K4me3-only	H3K4me3-only	H3K4me3-only	H3K4me3-only	H3K4me3-only	H3K4me3-only	H3K4me3-only	H3K4me3-only	H3K4me3-only	H3K4me3-only	H3K4me3-only	H3K4me3-only	H3K4me3-only	H3K4me3-only	H3K4me3-only	H3K4me3-only	H3K4me3-only	H3K4me3-only
NM_001007563	IGFBPL1	chr9	38406524	38424444	-	Bivalent	Bivalent	H3K4me3-only	Bivalent	Bivalent	Bivalent	Bivalent	H3K27me3-only	Bivalent	Bivalent	Bivalent	Bivalent	Bivalent	H3K27me3-only	H3K27me3-only	H3K4me3-only	H3K4me3-only	H3K4me3-only	H3K4me3-only	H3K4me3-only
NM_001007565	TFG	chr3	100428133	100467811	+	H3K4me3-only	H3K4me3-only	H3K4me3-only	H3K4me3-only	H3K4me3-only	H3K4me3-only	H3K4me3-only	H3K4me3-only	H3K4me3-only	H3K4me3-only	H3K4me3-only	H3K4me3-only	H3K4me3-only	H3K4me3-only	H3K4me3-only	H3K4me3-only	H3K4me3-only	H3K4me3-only	H3K4me3-only	H3K4me3-only
NM_001007595	C2CD4B	chr15	62455736	62457482	-	Bivalent	Bivalent	Bivalent	Bivalent	Bivalent	Bivalent	Bivalent	Bivalent	Bivalent	Bivalent	Bivalent	H3K27me3-only	Bivalent	H3K27me3-only	H3K4me3-only	H3K4me3-only	H3K4me3-only	H3K4me3-only	H3K4me3-only	H3K4me3-only
NM_001007792	NTRK1	chr1	156785541	156851642	+	H3K27me3-only	H3K27me3-only	H3K27me3-only	Bivalent	Bivalent	Unmarked	H3K27me3-only	H3K27me3-only	Unmarked	Unmarked	H3K4me3-only	Unmarked	Unmarked	Unmarked	Unmarked	Unmarked	H3K4me3-only	Unmarked	Unmarked	Unmarked
NM_001007793	BUB3	chr10	124913759	124924886	+	H3K4me3-only	Bivalent	Bivalent	H3K4me3-only	H3K4me3-only	Bivalent	Bivalent	Bivalent	H3K4me3-only	H3K4me3-only	H3K4me3-only	H3K4me3-only	H3K4me3-only	H3K4me3-only	Bivalent	H3K4me3-only	H3K4me3-only	H3K4me3-only	H3K4me3-only	H3K4me3-only
NM_001007794	CEPT1	chr1	111682248	111727724	+	H3K4me3-only	H3K4me3-only	H3K4me3-only	H3K4me3-only	H3K4me3-only	H3K4me3-only	H3K4me3-only	H3K4me3-only	H3K4me3-only	H3K4me3-only	H3K4me3-only	H3K4me3-only	H3K4me3-only	H3K4me3-only	H3K4me3-only	H3K4me3-only	H3K4me3-only	H3K4me3-only	H3K4me3-only	H3K4me3-only
NM_001008	RPS4Y1	chrY	2709622	2734997	+	H3K4me3-only	H3K4me3-only	H3K4me3-only	H3K4me3-only	H3K4me3-only	Unmarked	H3K4me3-only	H3K4me3-only	Unmarked	H3K4me3-only	H3K4me3-only	Unmarked	Unmarked	H3K4me3-only	H3K4me3-only	H3K4me3-only	H3K4me3-only	H3K4me3-only	H3K4me3-only	H3K4me3-only
NM_001008215	COA5	chr2	99215785	99224981	-	H3K4me3-only	H3K4me3-only	H3K4me3-only	H3K4me3-only	H3K4me3-only	H3K4me3-only	H3K4me3-only	H3K4me3-only	H3K4me3-only	H3K4me3-only	H3K4me3-only	H3K4me3-only	H3K4me3-only	H3K4me3-only	H3K4me3-only	H3K4me3-only	H3K4me3-only	H3K4me3-only	H3K4me3-only	H3K4me3-only
NM_001008216	GALE	chr1	24122088	24127294	-	H3K4me3-only	H3K4me3-only	Bivalent	H3K4me3-only	H3K4me3-only	H3K4me3-only	H3K4me3-only	H3K4me3-only	H3K4me3-only	H3K4me3-only	H3K4me3-only	H3K4me3-only	H3K4me3-only	H3K4me3-only	H3K4me3-only	H3K4me3-only	H3K4me3-only	H3K4me3-only	H3K4me3-only	H3K4me3-only
NM_001008220	CPLX2	chr5	175298500	175311023	+	Bivalent	Bivalent	Bivalent	Bivalent	Bivalent	H3K27me3-only	H3K27me3-only	H3K27me3-only	H3K27me3-only	H3K27me3-only	H3K27me3-only	H3K27me3-only	Bivalent	H3K27me3-only	Unmarked	H3K4me3-only	Unmarked	Unmarked	Unmarked	Unmarked
NM_001008222	ZDHHC9	chrX	128937263	128977561	-	H3K4me3-only	H3K4me3-only	H3K4me3-only	H3K4me3-only	H3K4me3-only	H3K4me3-only	H3K4me3-only	H3K4me3-only	H3K4me3-only	H3K4me3-only	H3K4me3-only	H3K4me3-only	H3K4me3-only	H3K4me3-only	H3K4me3-only	H3K4me3-only	H3K4me3-only	H3K4me3-only	H3K4me3-only	H3K4me3-only
NM_001008223	C1QL4	chr12	49726199	49730971	-	Bivalent	Bivalent	Bivalent	Bivalent	Bivalent	Bivalent	Bivalent	Bivalent	Bivalent	Bivalent	Bivalent	Bivalent	H3K4me3-only	Bivalent	H3K27me3-only	Unmarked	Unmarked	Unmarked	Unmarked	Unmarked
NM_001008224	UACA	chr15	70946892	70994620	-	Unmarked	Unmarked	H3K4me3-only	H3K4me3-only	H3K4me3-only	Unmarked	Unmarked	Unmarked	Unmarked	H3K4me3-only	Unmarked	Unmarked	Unmarked	H3K4me3-only	H3K4me3-only	Unmarked	Unmarked	Unmarked	Unmarked	Unmarked
NM_001008226	FAM154B	chr15	82555151	82577267	+	H3K4me3-only	H3K4me3-only	H3K4me3-only	H3K4me3-only	H3K4me3-only	H3K4me3-only	H3K4me3-only	H3K4me3-only	H3K4me3-only	H3K4me3-only	H3K4me3-only	H3K4me3-only	H3K4me3-only	H3K4me3-only	H3K4me3-only	H3K4me3-only	H3K4me3-only	H3K4me3-only	H3K4me3-only	H3K4me3-only
NM_001008237	TTC32	chr2	20096513	20101744	-	H3K4me3-only	H3K4me3-only	H3K4me3-only	H3K4me3-only	H3K4me3-only	H3K4me3-only	H3K4me3-only	H3K4me3-only	H3K4me3-only	H3K4me3-only	H3K4me3-only	H3K4me3-only	H3K4me3-only	H3K4me3-only	H3K4me3-only	H3K4me3-only	H3K4me3-only	H3K4me3-only	H3K4me3-only	H3K4me3-only
NM_001008239	C18orf25	chr18	43753987	43846955	+	H3K4me3-only	H3K4me3-only	H3K4me3-only	H3K4me3-only	H3K4me3-only	H3K4me3-only	H3K4me3-only	H3K4me3-only	H3K4me3-only	H3K4me3-only	H3K4me3-only	H3K4me3-only	H3K4me3-only	H3K4me3-only	H3K4me3-only	H3K4me3-only	H3K4me3-only	H3K4me3-only	H3K4me3-only	H3K4me3-only
NM_001008269	TMEM89	chr3	48658274	48659189	-	Unmarked	Unmarked	Unmarked	Unmarked	H3K4me3-only	Unmarked	Unmarked	Unmarked	Unmarked	H3K4me3-only	Unmarked	Unmarked	Unmarked	Unmarked	Unmarked	Unmarked	Unmarked	Unmarked	Unmarked	Unmarked
NM_001008270	PRSS37	chr7	141536077	141541221	-	Unmarked	Unmarked	Unmarked	Unmarked	Unmarked	Unmarked	Unmarked	Unmarked	Unmarked	Unmarked	Unmarked	Unmarked	Unmarked	Unmarked	Unmarked	Unmarked	Unmarked	Unmarked	Unmarked	Unmarked
NM_001008273	TAGLN3	chr3	111718006	111732735	+	Bivalent	Bivalent	H3K4me3-only	H3K4me3-only	H3K4me3-only	Bivalent	Bivalent	H3K4me3-only	H3K4me3-only	H3K4me3-only	Unmarked	H3K4me3-only	H3K4me3-only	H3K4me3-only	H3K4me3-only	H3K4me3-only	H3K4me3-only	Unmarked	H3K4me3-only	H3K4me3-only
NM_001008274	TRIM72	chr16	31225341	31236510	+	Unmarked	H3K27me3-only	H3K27me3-only	H3K27me3-only	H3K27me3-only	Unmarked	H3K27me3-only	H3K27me3-only	H3K27me3-only	Unmarked	H3K27me3-only	H3K27me3-only	Unmarked	H3K27me3-only	H3K27me3-only	Unmarked	Unmarked	Unmarked	Unmarked	Unmarked
NM_001008387	REG3G	chr2	79252811	79255630	+	Unmarked	Unmarked	Unmarked	Unmarked	Unmarked	Unmarked	Unmarked	Unmarked	Unmarked	Unmarked	Unmarked	Unmarked	Unmarked	Unmarked	Unmarked	Unmarked	Unmarked	Unmarked	Unmarked	H3K4me3-only
NM_001008388	CISD2	chr4	103790134	103813963	+	H3K4me3-only	H3K4me3-only	H3K4me3-only	H3K4me3-only	H3K4me3-only	H3K4me3-only	H3K4me3-only	H3K4me3-only	H3K4me3-only	H3K4me3-only	H3K4me3-only	H3K4me3-only	H3K4me3-only	H3K4me3-only	H3K4me3-only	H3K4me3-only	H3K4me3-only	H3K4me3-only	H3K4me3-only	H3K4me3-only
NM_001008391	CCDC73	chr11	32623625	32816204	-	Unmarked	Unmarked	Unmarked	Unmarked	Unmarked	Unmarked	Unmarked	Unmarked	Unmarked	Unmarked	Unmarked	Unmarked	Unmarked	Unmarked	Unmarked	Unmarked	Unmarked	Unmarked	Unmarked	Unmarked
NM_001008392	CTDSPL	chr3	37903668	38025960	+	H3K4me3-only	H3K4me3-only	Bivalent	H3K4me3-only	H3K4me3-only	H3K4me3-only	H3K4me3-only	H3K4me3-only	H3K4me3-only	H3K4me3-only	H3K4me3-only	H3K4me3-only	H3K4me3-only	H3K4me3-only	H3K4me3-only	H3K4me3-only	H3K4me3-only	H3K4me3-only	H3K4me3-only	H3K4me3-only
NM_001008393	C4orf46	chr4	159587826	159593202	-	H3K4me3-only	H3K4me3-only	H3K4me3-only	H3K4me3-only	H3K4me3-only	H3K4me3-only	H3K4me3-only	H3K4me3-only	H3K4me3-only	H3K4me3-only	H3K4me3-only	H3K4me3-only	H3K4me3-only	H3K4me3-only	H3K4me3-only	H3K4me3-only	H3K4me3-only	H3K4me3-only	H3K4me3-only	H3K4me3-only
NM_001008394	EID3	chr12	104697509	104698982	+	H3K4me3-only	H3K4me3-only	H3K4me3-only	H3K4me3-only	H3K4me3-only	H3K4me3-only	H3K4me3-only	H3K4me3-only	H3K4me3-only	H3K4me3-only	H3K4me3-only	H3K4me3-only	H3K4me3-only	H3K4me3-only	H3K4me3-only	H3K4me3-only	H3K4me3-only	H3K4me3-only	H3K4me3-only	H3K4me3-only
NM_001008395	LAMTOR4	chr7	99746529	99751833	+	H3K4me3-only	H3K4me3-only	H3K4me3-only	H3K4me3-only	H3K4me3-only	H3K4me3-only	H3K4me3-only	H3K4me3-only	H3K4me3-only	H3K4me3-only	H3K4me3-only	H3K4me3-only	H3K4me3-only	H3K4me3-only	H3K4me3-only	H3K4me3-only	H3K4me3-only	H3K4me3-only	H3K4me3-only	H3K4me3-only
NM_001008396	WDHD1	chr14	55405655	55493819	-	H3K4me3-only	H3K4me3-only	H3K4me3-only	H3K4me3-only	H3K4me3-only	H3K4me3-only	H3K4me3-only	H3K4me3-only	H3K4me3-only	H3K4me3-only	H3K4me3-only	H3K4me3-only	H3K4me3-only	H3K4me3-only	H3K4me3-only	H3K4me3-only	H3K4me3-only	H3K4me3-only	H3K4me3-only	H3K4me3-only
NM_001008397	GPX8	chr5	54455983	54463129	+	H3K4me3-only	H3K4me3-only	H3K4me3-only	H3K4me3-only	H3K4me3-only	Unmarked	H3K4me3-only	H3K4me3-only	H3K4me3-only	H3K4me3-only	Unmarked	H3K4me3-only	H3K4me3-only	H3K4me3-only	H3K4me3-only	H3K4me3-only	Unmarked	Unmarked	Unmarked	H3K4me3-only
NM_001008401	ZNF761	chr19	53935226	53961515	+	H3K4me3-only	H3K4me3-only	H3K4me3-only	H3K4me3-only	H3K4me3-only	H3K4me3-only	H3K4me3-only	H3K4me3-only	H3K4me3-only	H3K4me3-only	H3K4me3-only	H3K4me3-only	H3K4me3-only	H3K4me3-only	H3K4me3-only	H3K4me3-only	H3K4me3-only	H3K4me3-only	H3K4me3-only	H3K4me3-only
NM_001008404	C14orf180	chr14	105046055	105056183	+	Unmarked	Unmarked	Unmarked	H3K27me3-only	Bivalent	H3K27me3-only	Unmarked	Unmarked	H3K27me3-only	H3K27me3-only	Unmarked	H3K27me3-only	H3K27me3-only	H3K27me3-only	Unmarked	Unmarked	Unmarked	H3K4me3-only	Unmarked	Unmarked
NM_001008405	BCAP29	chr7	107221203	107263762	+	H3K4me3-only	H3K4me3-only	H3K4me3-only	H3K4me3-only	H3K4me3-only	H3K4me3-only	H3K4me3-only	H3K4me3-only	H3K4me3-only	H3K4me3-only	H3K4me3-only	H3K4me3-only	H3K4me3-only	H3K4me3-only	H3K4me3-only	H3K4me3-only	H3K4me3-only	H3K4me3-only	H3K4me3-only	H3K4me3-only
NM_001008409	TTLL9	chr20	30458504	30530858	+	Bivalent	Bivalent	Bivalent	Bivalent	Bivalent	H3K4me3-only	H3K4me3-only	H3K4me3-only	Bivalent	H3K4me3-only	Bivalent	Bivalent	H3K4me3-only	H3K27me3-only	Bivalent	H3K4me3-only	H3K4me3-only	H3K4me3-only	H3K4me3-only	H3K4me3-only
NM_001008485	SLC41A3	chr3	125725199	125803134	-	H3K4me3-only	H3K4me3-only	H3K4me3-only	H3K4me3-only	H3K4me3-only	H3K4me3-only	H3K4me3-only	H3K4me3-only	H3K4me3-only	H3K4me3-only	H3K4me3-only	H3K4me3-only	H3K4me3-only	H3K4me3-only	H3K4me3-only	H3K4me3-only	H3K4me3-only	H3K4me3-only	H3K4me3-only	H3K4me3-only
NM_001008487	SLC41A3	chr3	125725199	125775618	-	Unmarked	Unmarked	Unmarked	Unmarked	Unmarked	Unmarked	Unmarked	Unmarked	Unmarked	Unmarked	Unmarked	Unmarked	Unmarked	Unmarked	Unmarked	Unmarked	Unmarked	Unmarked	Unmarked	Unmarked
NM_001008492	SEPT2	chr2	242255280	242293441	+	H3K4me3-only	H3K4me3-only	Bivalent	H3K4me3-only	H3K4me3-only	H3K4me3-only	H3K4me3-only	H3K4me3-only	H3K4me3-only	H3K4me3-only	H3K4me3-only	H3K4me3-only	H3K4me3-only	H3K4me3-only	H3K4me3-only	H3K4me3-only	H3K4me3-only	H3K4me3-only	H3K4me3-only	H3K4me3-only
NM_001008494	ISX	chr22	35462129	35483380	+	Unmarked	Unmarked	Unmarked	Unmarked	Unmarked	Unmarked	H3K4me3-only	H3K4me3-only	Unmarked	Unmarked	Unmarked	Unmarked	Unmarked	Unmarked	Unmarked	Unmarked	Unmarked	Unmarked	Unmarked	Unmarked
NM_001008495	TMEM64	chr8	91634222	91658133	-	H3K4me3-only	H3K4me3-only	Bivalent	H3K4me3-only	H3K4me3-only	H3K4me3-only	H3K4me3-only	H3K4me3-only	H3K4me3-only	H3K4me3-only	H3K4me3-only	H3K4me3-only	H3K4me3-only	H3K4me3-only	H3K4me3-only	H3K4me3-only	H3K4me3-only	H3K4me3-only	H3K4me3-only	H3K4me3-only
NM_001008504	OPRM1	chr6	154360442	154413073	+	H3K4me3-only	Bivalent	Bivalent	Unmarked	Unmarked	H3K27me3-only	Unmarked	H3K27me3-only	Unmarked	Unmarked	H3K27me3-only	Unmarked	H3K27me3-only	Unmarked	Unmarked	H3K4me3-only	Unmarked	Unmarked	Unmarked	Unmarked
NM_001008528	MXRA7	chr17	74671808	74707056	-	Bivalent	Bivalent	H3K4me3-only	H3K4me3-only	H3K4me3-only	Bivalent	Bivalent	H3K4me3-only	H3K4me3-only	H3K4me3-only	H3K4me3-only	H3K4me3-only	H3K4me3-only	H3K4me3-only	H3K4me3-only	H3K4me3-only	H3K4me3-only	H3K4me3-only	H3K4me3-only	H3K4me3-only
NM_001008536	TCHHL1	chr1	152056619	152061540	-	Unmarked	Unmarked	Unmarked	Unmarked	Unmarked	Unmarked	H3K27me3-only	Unmarked	Unmarked	Unmarked	Unmarked	Unmarked	H3K27me3-only	Unmarked	Unmarked	Unmarked	Unmarked	Unmarked	Unmarked	Unmarked
NM_001008537	KIAA2022	chrX	73952690	74145287	-	Bivalent	Bivalent	H3K4me3-only	Bivalent	Bivalent	Bivalent	Bivalent	Bivalent	Bivalent	Bivalent	Bivalent	Bivalent	Bivalent	H3K27me3-only	Unmarked	H3K4me3-only	H3K4me3-only	H3K4me3-only	H3K4me3-only	H3K4me3-only
NM_001008539	SLC7A2	chr8	17354596	17428077	+	Bivalent	Bivalent	Bivalent	H3K4me3-only	H3K4me3-only	Bivalent	H3K4me3-only	H3K4me3-only	Bivalent	H3K4me3-only	Bivalent	Bivalent	H3K4me3-only	H3K4me3-only	H3K4me3-only	H3K4me3-only	H3K4me3-only	H3K4me3-only	H3K4me3-only	H3K4me3-only
NM_001008540	CXCR4	chr2	136871918	136873813	-	Bivalent	Bivalent	Bivalent	Bivalent	Bivalent	H3K4me3-only	Bivalent	H3K27me3-only	H3K27me3-only	H3K27me3-only	H3K4me3-only	H3K27me3-only	Bivalent	H3K27me3-only	Bivalent	Unmarked	H3K4me3-only	H3K4me3-only	Unmarked	Unmarked
NM_001008541	MXI1	chr10	111969988	112047123	+	Bivalent	Bivalent	Bivalent	H3K4me3-only	H3K4me3-only	Bivalent	H3K4me3-only	H3K4me3-only	H3K4me3-only	H3K4me3-only	H3K4me3-only	H3K4me3-only	H3K4me3-only	H3K4me3-only	H3K4me3-only	H3K4me3-only	H3K4me3-only	H3K4me3-only	H3K4me3-only	H3K4me3-only
NM_001008563	USP20	chr9	132597695	132644117	+	H3K4me3-only	H3K4me3-only	H3K4me3-only	H3K4me3-only	H3K4me3-only	H3K4me3-only	H3K4me3-only	H3K4me3-only	H3K4me3-only	H3K4me3-only	H3K4me3-only	H3K4me3-only	H3K4me3-only	H3K4me3-only	H3K4me3-only	H3K4me3-only	H3K4me3-only	H3K4me3-only	H3K4me3-only	H3K4me3-only
NM_001008564	NUPL1	chr13	25875665	25916561	+	H3K4me3-only	H3K4me3-only	H3K4me3-only	H3K4me3-only	H3K4me3-only	H3K4me3-only	H3K4me3-only	H3K4me3-only	H3K4me3-only	H3K4me3-only	H3K4me3-only	H3K4me3-only	H3K4me3-only	H3K4me3-only	H3K4me3-only	H3K4me3-only	H3K4me3-only	H3K4me3-only	H3K4me3-only	H3K4me3-only
NM_001008566	TPST2	chr22	26921713	26961370	-	Unmarked	Unmarked	Unmarked	Unmarked	Unmarked	Unmarked	Unmarked	Unmarked	Unmarked	Unmarked	Unmarked	Unmarked	Unmarked	Unmarked	Unmarked	H3K4me3-only	Unmarked	Unmarked	Unmarked	H3K4me3-only
NM_001008661	CCBL2	chr1	89401455	89458643	-	H3K4me3-only	H3K4me3-only	H3K4me3-only	H3K4me3-only	H3K4me3-only	H3K4me3-only	H3K4me3-only	H3K4me3-only	H3K4me3-only	H3K4me3-only	H3K4me3-only	H3K4me3-only	H3K4me3-only	H3K4me3-only	H3K4me3-only	H3K4me3-only	H3K4me3-only	H3K4me3-only	H3K4me3-only	H3K4me3-only
NM_001008693	CST9	chr20	23583046	23586610	-	Unmarked	Unmarked	Unmarked	H3K27me3-only	H3K27me3-only	Unmarked	Unmarked	Unmarked	Unmarked	H3K27me3-only	Unmarked	Unmarked	Unmarked	H3K27me3-only	Unmarked	Unmarked	Unmarked	Unmarked	Unmarked	Unmarked
NM_001008695	THAP7	chr22	21354060	21356404	-	H3K4me3-only	H3K4me3-only	H3K4me3-only	H3K4me3-only	H3K4me3-only	H3K4me3-only	H3K4me3-only	H3K4me3-only	H3K4me3-only	H3K4me3-only	H3K4me3-only	H3K4me3-only	H3K4me3-only	H3K4me3-only	H3K4me3-only	H3K4me3-only	H3K4me3-only	H3K4me3-only	H3K4me3-only	H3K4me3-only
NM_001008697	TFIP11	chr22	26887893	26908437	-	H3K4me3-only	H3K4me3-only	H3K4me3-only	H3K4me3-only	H3K4me3-only	H3K4me3-only	H3K4me3-only	H3K4me3-only	H3K4me3-only	H3K4me3-only	H3K4me3-only	H3K4me3-only	H3K4me3-only	H3K4me3-only	H3K4me3-only	H3K4me3-only	H3K4me3-only	H3K4me3-only	H3K4me3-only	H3K4me3-only
NM_001008701	LPHN1	chr19	14258548	14316997	-	H3K4me3-only	H3K4me3-only	H3K4me3-only	Bivalent	Bivalent	H3K4me3-only	H3K4me3-only	H3K4me3-only	H3K27me3-only	H3K4me3-only	H3K4me3-only	Bivalent	H3K4me3-only	H3K27me3-only	H3K27me3-only	H3K4me3-only	H3K4me3-only	H3K4me3-only	H3K4me3-only	H3K4me3-only
NM_001008707	EML1	chr14	100259744	100408395	+	H3K4me3-only	H3K4me3-only	Bivalent	H3K4me3-only	H3K4me3-only	Bivalent	H3K4me3-only	H3K4me3-only	Bivalent	H3K4me3-only	Bivalent	Bivalent	H3K4me3-only	H3K4me3-only	H3K4me3-only	H3K4me3-only	H3K4me3-only	H3K4me3-only	H3K4me3-only	H3K4me3-only
NM_001008708	CHAC2	chr2	53994928	54002287	+	H3K4me3-only	H3K4me3-only	H3K4me3-only	H3K4me3-only	H3K4me3-only	H3K4me3-only	H3K4me3-only	H3K4me3-only	H3K4me3-only	H3K4me3-only	H3K4me3-only	H3K4me3-only	H3K4me3-only	H3K4me3-only	H3K4me3-only	H3K4me3-only	H3K4me3-only	H3K4me3-only	H3K4me3-only	H3K4me3-only
NM_001008709	PPP1CA	chr11	67165651	67169376	-	H3K4me3-only	H3K4me3-only	H3K4me3-only	H3K4me3-only	H3K4me3-only	H3K4me3-only	H3K4me3-only	H3K4me3-only	H3K4me3-only	H3K4me3-only	H3K4me3-only	H3K4me3-only	H3K4me3-only	H3K4me3-only	H3K4me3-only	H3K4me3-only	H3K4me3-only	H3K4me3-only	H3K4me3-only	H3K4me3-only
NM_001008710	RBPMS	chr8	30242016	30429778	+	H3K4me3-only	H3K4me3-only	Bivalent	H3K4me3-only	H3K4me3-only	H3K4me3-only	Bivalent	Bivalent	H3K4me3-only	H3K4me3-only	Bivalent	H3K4me3-only	H3K4me3-only	H3K4me3-only	H3K4me3-only	H3K4me3-only	H3K4me3-only	H3K4me3-only	H3K4me3-only	H3K4me3-only
NM_001008723	CCDC147	chr10	106113521	106214848	+	Bivalent	Bivalent	Bivalent	H3K4me3-only	H3K4me3-only	H3K4me3-only	Bivalent	H3K4me3-only	H3K4me3-only	H3K4me3-only	H3K4me3-only	H3K4me3-only	H3K4me3-only	H3K4me3-only	H3K4me3-only	H3K4me3-only	H3K4me3-only	Unmarked	H3K4me3-only	H3K4me3-only
NM_001008727	ZNF121	chr19	9676291	9695209	-	H3K4me3-only	H3K4me3-only	H3K4me3-only	H3K4me3-only	H3K4me3-only	H3K4me3-only	H3K4me3-only	H3K4me3-only	H3K4me3-only	H3K4me3-only	H3K4me3-only	H3K4me3-only	H3K4me3-only	H3K4me3-only	H3K4me3-only	H3K4me3-only	H3K4me3-only	H3K4me3-only	H3K4me3-only	H3K4me3-only
NM_001008737	LOC401052	chr3	10048101	10052779	-	H3K4me3-only	H3K4me3-only	Bivalent	Bivalent	H3K4me3-only	H3K4me3-only	H3K4me3-only	H3K4me3-only	H3K4me3-only	H3K4me3-only	H3K4me3-only	H3K4me3-only	H3K4me3-only	H3K4me3-only	H3K4me3-only	H3K4me3-only	H3K4me3-only	H3K4me3-only	H3K4me3-only	H3K4me3-only
NM_001008739	C6orf226	chr6	42858002	42858554	-	H3K4me3-only	H3K4me3-only	H3K4me3-only	H3K4me3-only	H3K4me3-only	H3K4me3-only	H3K4me3-only	H3K4me3-only	H3K4me3-only	H3K4me3-only	H3K4me3-only	H3K4me3-only	H3K4me3-only	H3K4me3-only	H3K4me3-only	H3K4me3-only	H3K4me3-only	H3K4me3-only	H3K4me3-only	H3K4me3-only
NM_001008740	TMCO2	chr1	40713572	40717365	+	Unmarked	Unmarked	Unmarked	Unmarked	Unmarked	Unmarked	Unmarked	Unmarked	Unmarked	Unmarked	Unmarked	Unmarked	Unmarked	Unmarked	Unmarked	Unmarked	Unmarked	Unmarked	Unmarked	Unmarked
NM_001008743	SULT1C3	chr2	108863650	108881807	+	Unmarked	Unmarked	Unmarked	Unmarked	Unmarked	Unmarked	Unmarked	Unmarked	Unmarked	Unmarked	Unmarked	Unmarked	Unmarked	Unmarked	Unmarked	Unmarked	Unmarked	Unmarked	Unmarked	Unmarked
NM_001008747	CTAGE15	chr7	143268893	143271480	+	Unmarked	Unmarked	Unmarked	Unmarked	Unmarked	Unmarked	Unmarked	Unmarked	Unmarked	Unmarked	Unmarked	Unmarked	Unmarked	Unmarked	Unmarked	Unmarked	Unmarked	Unmarked	Unmarked	Unmarked
NM_001008749	RAB19	chr7	140103842	140126050	+	H3K4me3-only	H3K4me3-only	H3K27me3-only	Bivalent	H3K4me3-only	H3K4me3-only	H3K4me3-only	H3K4me3-only	H3K4me3-only	Unmarked	H3K4me3-only	H3K4me3-only	H3K4me3-only	Bivalent	H3K27me3-only	H3K4me3-only	H3K4me3-only	Unmarked	H3K4me3-only	H3K4me3-only
NM_001008777	FBXO47	chr17	37092684	37123655	-	H3K4me3-only	H3K4me3-only	H3K4me3-only	H3K4me3-only	H3K4me3-only	H3K4me3-only	H3K4me3-only	H3K4me3-only	H3K4me3-only	H3K4me3-only	Unmarked	Unmarked	H3K4me3-only	Unmarked	H3K4me3-only	Unmarked	Unmarked	Unmarked	Unmarked	H3K4me3-only
NM_001008778	SPDYC	chr11	64937706	64940688	+	Unmarked	Unmarked	Unmarked	Unmarked	H3K4me3-only	Unmarked	Unmarked	Unmarked	Unmarked	H3K4me3-only	Unmarked	Unmarked	Unmarked	Unmarked	Unmarked	Unmarked	Unmarked	Unmarked	Unmarked	Unmarked
NM_001008779	SPDYA	chr2	29038862	29063675	+	Unmarked	Unmarked	Unmarked	Unmarked	Unmarked	Unmarked	Unmarked	Unmarked	Unmarked	Unmarked	Unmarked	Unmarked	Unmarked	Unmarked	Unmarked	Unmarked	Unmarked	Unmarked	Unmarked	Unmarked
NM_001008781	FAT3	chr11	92085261	92629635	+	Unmarked	Unmarked	Unmarked	Unmarked	Unmarked	Unmarked	Unmarked	Unmarked	Unmarked	Unmarked	Unmarked	Unmarked	Unmarked	Unmarked	Unmarked	Unmarked	Unmarked	Unmarked	Unmarked	Unmarked
NM_001008783	SLC35D3	chr6	137243401	137246776	+	Bivalent	Bivalent	Bivalent	Bivalent	Bivalent	Bivalent	Bivalent	Bivalent	Bivalent	Bivalent	Bivalent	Bivalent	H3K4me3-only	Bivalent	Bivalent	H3K4me3-only	H3K4me3-only	H3K4me3-only	H3K4me3-only	H3K4me3-only
NM_001008784	CD200R1L	chr3	112534555	112564797	-	Unmarked	Unmarked	Unmarked	Unmarked	Unmarked	Unmarked	Unmarked	Unmarked	Unmarked	Unmarked	Unmarked	Unmarked	Unmarked	Unmarked	Unmarked	Unmarked	Unmarked	Unmarked	Unmarked	Unmarked
NM_001008844	DSP	chr6	7541869	7586946	+	Bivalent	Bivalent	Bivalent	Bivalent	Bivalent	Bivalent	Bivalent	Bivalent	H3K4me3-only	Bivalent	Bivalent	H3K4me3-only	H3K4me3-only	Bivalent	Bivalent	H3K4me3-only	H3K4me3-only	H3K4me3-only	H3K4me3-only	H3K4me3-only
NM_001008895	CUL4A	chr13	113863818	113919392	+	H3K4me3-only	H3K4me3-only	H3K4me3-only	H3K4me3-only	H3K4me3-only	H3K4me3-only	H3K4me3-only	H3K4me3-only	H3K4me3-only	H3K4me3-only	H3K4me3-only	H3K4me3-only	H3K4me3-only	H3K4me3-only	H3K4me3-only	H3K4me3-only	H3K4me3-only	H3K4me3-only	H3K4me3-only	H3K4me3-only
NM_001008897	TCP1	chr6	160199529	160210735	-	H3K4me3-only	H3K4me3-only	H3K4me3-only	H3K4me3-only	H3K4me3-only	H3K4me3-only	H3K4me3-only	H3K4me3-only	H3K4me3-only	H3K4me3-only	H3K4me3-only	H3K4me3-only	H3K4me3-only	H3K4me3-only	H3K4me3-only	H3K4me3-only	H3K4me3-only	H3K4me3-only	H3K4me3-only	H3K4me3-only
NM_001008901	GTSF1L	chr20	42354800	42355642	-	Unmarked	Unmarked	Unmarked	Unmarked	Unmarked	Unmarked	Unmarked	Unmarked	Unmarked	Unmarked	Unmarked	Unmarked	Unmarked	Unmarked	Unmarked	Unmarked	Unmarked	Unmarked	Unmarked	Unmarked
NM_001008910	STK16	chr2	220110191	220115059	+	H3K4me3-only	H3K4me3-only	H3K4me3-only	H3K4me3-only	H3K4me3-only	H3K4me3-only	H3K4me3-only	H3K4me3-only	H3K4me3-only	H3K4me3-only	H3K4me3-only	H3K4me3-only	H3K4me3-only	H3K4me3-only	H3K4me3-only	H3K4me3-only	H3K4me3-only	H3K4me3-only	H3K4me3-only	H3K4me3-only
NM_001008925	RCHY1	chr4	76404246	76439640	-	H3K4me3-only	H3K4me3-only	Bivalent	H3K4me3-only	H3K4me3-only	H3K4me3-only	H3K4me3-only	H3K4me3-only	H3K4me3-only	H3K4me3-only	H3K4me3-only	H3K4me3-only	H3K4me3-only	H3K4me3-only	H3K4me3-only	H3K4me3-only	H3K4me3-only	H3K4me3-only	H3K4me3-only	H3K4me3-only
NM_001008938	CKAP5	chr11	46765083	46867859	-	H3K4me3-only	H3K4me3-only	H3K4me3-only	H3K4me3-only	H3K4me3-only	H3K4me3-only	H3K4me3-only	H3K4me3-only	H3K4me3-only	H3K4me3-only	H3K4me3-only	H3K4me3-only	H3K4me3-only	H3K4me3-only	H3K4me3-only	H3K4me3-only	H3K4me3-only	H3K4me3-only	H3K4me3-only	H3K4me3-only
NM_001008949	ITPRIPL1	chr2	96991061	96994091	+	H3K4me3-only	Bivalent	H3K4me3-only	H3K4me3-only	H3K4me3-only	H3K4me3-only	Bivalent	Bivalent	Bivalent	H3K4me3-only	H3K4me3-only	H3K27me3-only	H3K4me3-only	Bivalent	H3K4me3-only	H3K4me3-only	H3K4me3-only	H3K4me3-only	H3K4me3-only	H3K4me3-only
NM_001009	RPS5	chr19	58898635	58906171	+	H3K4me3-only	H3K4me3-only	H3K4me3-only	H3K4me3-only	H3K4me3-only	H3K4me3-only	H3K4me3-only	H3K4me3-only	H3K4me3-only	H3K4me3-only	H3K4me3-only	H3K4me3-only	H3K4me3-only	H3K4me3-only	H3K4me3-only	H3K4me3-only	H3K4me3-only	H3K4me3-only	H3K4me3-only	H3K4me3-only
NM_001009183	GEMIN2	chr14	39583487	39606177	+	H3K4me3-only	H3K4me3-only	H3K4me3-only	H3K4me3-only	H3K4me3-only	H3K4me3-only	H3K4me3-only	H3K4me3-only	H3K4me3-only	H3K4me3-only	H3K4me3-only	H3K4me3-only	H3K4me3-only	H3K4me3-only	H3K4me3-only	H3K4me3-only	H3K4me3-only	H3K4me3-only	H3K4me3-only	H3K4me3-only
NM_001009552	PPP2CB	chr8	30643125	30670352	-	H3K4me3-only	H3K4me3-only	Bivalent	H3K4me3-only	H3K4me3-only	H3K4me3-only	H3K4me3-only	H3K4me3-only	H3K4me3-only	H3K4me3-only	H3K4me3-only	H3K4me3-only	H3K4me3-only	H3K4me3-only	H3K4me3-only	H3K4me3-only	H3K4me3-only	H3K4me3-only	H3K4me3-only	H3K4me3-only
NM_001009554	MFAP3L	chr4	170907747	170924935	-	Unmarked	Unmarked	Unmarked	Unmarked	Unmarked	Unmarked	Unmarked	Unmarked	Unmarked	Unmarked	Unmarked	Unmarked	Unmarked	Unmarked	Unmarked	Unmarked	Unmarked	Unmarked	Unmarked	Unmarked
NM_001009562	SLCO1B7	chr12	21168629	21243040	+	Unmarked	Unmarked	Unmarked	Unmarked	Unmarked	Unmarked	Unmarked	Unmarked	Unmarked	Unmarked	Unmarked	Unmarked	Unmarked	Unmarked	Unmarked	Unmarked	Unmarked	Unmarked	Unmarked	Unmarked
NM_001009565	CDKL4	chr2	39405687	39456673	-	Unmarked	H3K4me3-only	Unmarked	Unmarked	Unmarked	Unmarked	Unmarked	Unmarked	Unmarked	Unmarked	Unmarked	Unmarked	Unmarked	Unmarked	Unmarked	Unmarked	Unmarked	Unmarked	Unmarked	Unmarked
NM_001009566	CLSTN1	chr1	9789078	9884550	-	Bivalent	Bivalent	Bivalent	Bivalent	Bivalent	H3K4me3-only	H3K4me3-only	H3K4me3-only	H3K4me3-only	H3K4me3-only	H3K4me3-only	H3K4me3-only	H3K4me3-only	H3K4me3-only	H3K4me3-only	H3K4me3-only	H3K4me3-only	H3K4me3-only	H3K4me3-only	H3K4me3-only
NM_001009570	CCT7	chr2	73461363	73480150	+	H3K4me3-only	H3K4me3-only	H3K4me3-only	H3K4me3-only	H3K4me3-only	H3K4me3-only	H3K4me3-only	H3K4me3-only	H3K4me3-only	H3K4me3-only	H3K4me3-only	H3K4me3-only	H3K4me3-only	H3K4me3-only	H3K4me3-only	H3K4me3-only	H3K4me3-only	H3K4me3-only	H3K4me3-only	H3K4me3-only
NM_001009606	HS3ST6	chr16	1961464	1968231	-	Bivalent	Bivalent	Bivalent	Bivalent	Bivalent	H3K27me3-only	H3K27me3-only	H3K27me3-only	H3K27me3-only	Bivalent	H3K27me3-only	H3K27me3-only	Bivalent	H3K27me3-only	H3K27me3-only	Unmarked	H3K4me3-only	Unmarked	Unmarked	Unmarked
NM_001009608	SLX4IP	chr20	10415950	10604027	+	H3K4me3-only	H3K4me3-only	H3K4me3-only	H3K4me3-only	H3K4me3-only	H3K4me3-only	H3K4me3-only	H3K4me3-only	H3K4me3-only	H3K4me3-only	H3K4me3-only	H3K4me3-only	H3K4me3-only	H3K4me3-only	H3K4me3-only	H3K4me3-only	H3K4me3-only	H3K4me3-only	H3K4me3-only	H3K4me3-only
NM_001009609	SPANXN3	chrX	142596563	142605307	-	Unmarked	Unmarked	Unmarked	Unmarked	Unmarked	Unmarked	Unmarked	Unmarked	Unmarked	Unmarked	Unmarked	Unmarked	Unmarked	Unmarked	Unmarked	Unmarked	Unmarked	Unmarked	Unmarked	Unmarked
NM_001009611	PRAMEF4	chr1	12939032	12946025	-	Unmarked	Unmarked	Unmarked	Unmarked	Unmarked	Unmarked	Unmarked	Unmarked	Unmarked	Unmarked	Unmarked	Unmarked	Unmarked	Unmarked	Unmarked	Unmarked	Unmarked	Unmarked	Unmarked	Unmarked
NM_001009612	C20orf202	chr20	1184097	1188918	+	Unmarked	Unmarked	H3K27me3-only	H3K27me3-only	H3K27me3-only	Unmarked	Unmarked	Unmarked	H3K27me3-only	Unmarked	Unmarked	Unmarked	Unmarked	H3K27me3-only	Unmarked	Unmarked	Unmarked	Unmarked	Unmarked	Unmarked
NM_001009613	SPANXN4	chrX	142113703	142122066	+	Unmarked	Unmarked	Unmarked	Unmarked	Unmarked	Unmarked	Unmarked	Unmarked	Unmarked	Unmarked	Unmarked	Unmarked	H3K27me3-only	Unmarked	Unmarked	Unmarked	Unmarked	Unmarked	Unmarked	Unmarked
NM_001009614	SPANXN1	chrX	144329106	144337728	+	Unmarked	Unmarked	Unmarked	Unmarked	Unmarked	Unmarked	Unmarked	Unmarked	Unmarked	Unmarked	Unmarked	Unmarked	H3K27me3-only	Unmarked	Unmarked	Unmarked	Unmarked	Unmarked	Unmarked	Unmarked
NM_001009615	SPANXN2	chrX	142795054	142804516	-	Unmarked	Unmarked	Unmarked	Unmarked	Unmarked	Unmarked	Unmarked	Unmarked	Unmarked	Unmarked	Unmarked	Unmarked	Unmarked	Unmarked	Unmarked	Unmarked	Unmarked	Unmarked	Unmarked	Unmarked
NM_001009616	SPANXN5	chrX	52825185	52826388	-	Unmarked	Unmarked	Unmarked	Unmarked	Unmarked	H3K27me3-only	Unmarked	Unmarked	Unmarked	Unmarked	Unmarked	Unmarked	H3K27me3-only	Unmarked	Unmarked	Unmarked	Unmarked	Unmarked	Unmarked	Unmarked
NM_001009811	AZI1	chr17	79163392	79196751	-	H3K4me3-only	H3K4me3-only	Bivalent	H3K4me3-only	H3K4me3-only	H3K4me3-only	Bivalent	H3K4me3-only	H3K4me3-only	H3K4me3-only	H3K4me3-only	H3K4me3-only	H3K4me3-only	H3K4me3-only	H3K4me3-only	H3K4me3-only	H3K4me3-only	H3K4me3-only	H3K4me3-only	H3K4me3-only
NM_001009812	LBX2	chr2	74724643	74730443	-	Bivalent	Bivalent	Bivalent	Bivalent	H3K4me3-only	Bivalent	H3K4me3-only	H3K4me3-only	Bivalent	H3K4me3-only	Bivalent	H3K4me3-only	Bivalent	H3K4me3-only	H3K4me3-only	H3K4me3-only	H3K4me3-only	H3K4me3-only	H3K4me3-only	H3K4me3-only
NM_001009877	BRD9	chr5	863849	892674	-	H3K4me3-only	H3K4me3-only	H3K4me3-only	H3K4me3-only	H3K4me3-only	H3K4me3-only	H3K4me3-only	H3K4me3-only	H3K4me3-only	H3K4me3-only	H3K4me3-only	H3K4me3-only	H3K4me3-only	H3K4me3-only	H3K4me3-only	H3K4me3-only	H3K4me3-only	H3K4me3-only	H3K4me3-only	H3K4me3-only
NM_001009880	KIAA0930	chr22	45588122	45636650	-	H3K4me3-only	Bivalent	H3K4me3-only	Bivalent	H3K4me3-only	H3K4me3-only	H3K4me3-only	H3K4me3-only	H3K4me3-only	H3K4me3-only	H3K4me3-only	H3K4me3-only	H3K4me3-only	H3K4me3-only	H3K4me3-only	H3K4me3-only	H3K4me3-only	H3K4me3-only	H3K4me3-only	H3K4me3-only
NM_001009894	C12orf29	chr12	88429267	88443937	+	H3K4me3-only	H3K4me3-only	H3K4me3-only	H3K4me3-only	H3K4me3-only	H3K4me3-only	H3K4me3-only	H3K4me3-only	H3K4me3-only	H3K4me3-only	H3K4me3-only	H3K4me3-only	H3K4me3-only	H3K4me3-only	H3K4me3-only	H3K4me3-only	H3K4me3-only	H3K4me3-only	H3K4me3-only	H3K4me3-only
NM_001009899	KIAA2018	chr3	113367232	113415493	-	H3K4me3-only	H3K4me3-only	H3K4me3-only	H3K4me3-only	H3K4me3-only	H3K4me3-only	H3K4me3-only	H3K4me3-only	H3K4me3-only	H3K4me3-only	H3K4me3-only	H3K4me3-only	H3K4me3-only	H3K4me3-only	H3K4me3-only	H3K4me3-only	H3K4me3-only	H3K4me3-only	H3K4me3-only	H3K4me3-only
NM_001009905	B3GNTL1	chr17	80901666	81009686	-	H3K4me3-only	H3K4me3-only	H3K4me3-only	H3K4me3-only	H3K4me3-only	H3K4me3-only	H3K4me3-only	H3K4me3-only	H3K4me3-only	H3K4me3-only	H3K4me3-only	H3K4me3-only	H3K4me3-only	H3K4me3-only	H3K4me3-only	H3K4me3-only	H3K4me3-only	H3K4me3-only	H3K4me3-only	H3K4me3-only
NM_001009924	TMEM230	chr20	5080483	5093733	-	H3K4me3-only	H3K4me3-only	H3K4me3-only	H3K4me3-only	H3K4me3-only	H3K4me3-only	H3K4me3-only	H3K4me3-only	H3K4me3-only	H3K4me3-only	H3K4me3-only	H3K4me3-only	H3K4me3-only	H3K4me3-only	H3K4me3-only	H3K4me3-only	H3K4me3-only	H3K4me3-only	H3K4me3-only	H3K4me3-only
NM_001009931	HRNR	chr1	152184551	152196672	-	Unmarked	Unmarked	Unmarked	Unmarked	Unmarked	Unmarked	Unmarked	Unmarked	Unmarked	Unmarked	Unmarked	Unmarked	Unmarked	Unmarked	Unmarked	Unmarked	Unmarked	Unmarked	Unmarked	Unmarked
NM_001009934	DNASE1L1	chrX	153629578	153640427	-	H3K4me3-only	H3K4me3-only	H3K4me3-only	H3K4me3-only	H3K4me3-only	H3K4me3-only	H3K4me3-only	H3K4me3-only	H3K4me3-only	H3K4me3-only	H3K4me3-only	H3K4me3-only	Bivalent	H3K4me3-only	H3K4me3-only	H3K4me3-only	H3K4me3-only	H3K4me3-only	H3K4me3-only	H3K4me3-only
NM_001009936	PHF19	chr9	123631852	123639606	-	H3K4me3-only	H3K4me3-only	Bivalent	H3K4me3-only	H3K4me3-only	H3K4me3-only	H3K4me3-only	H3K4me3-only	H3K4me3-only	H3K4me3-only	H3K4me3-only	H3K4me3-only	H3K4me3-only	H3K4me3-only	H3K4me3-only	H3K4me3-only	H3K4me3-only	H3K4me3-only	H3K4me3-only	H3K4me3-only
NM_001009939	SEPT5	chr22	19705957	19710845	+	Bivalent	Bivalent	Bivalent	Bivalent	Bivalent	H3K4me3-only	Bivalent	Bivalent	Bivalent	Bivalent	H3K4me3-only	H3K4me3-only	H3K4me3-only	H3K4me3-only	H3K4me3-only	H3K4me3-only	H3K4me3-only	H3K4me3-only	H3K4me3-only	H3K4me3-only
NM_001009941	ANKRD16	chr10	5920049	5931860	-	H3K4me3-only	H3K4me3-only	H3K4me3-only	H3K4me3-only	H3K4me3-only	H3K4me3-only	H3K4me3-only	H3K4me3-only	H3K4me3-only	H3K4me3-only	H3K4me3-only	H3K4me3-only	H3K4me3-only	H3K4me3-only	H3K4me3-only	H3K4me3-only	H3K4me3-only	H3K4me3-only	H3K4me3-only	H3K4me3-only
NM_001009955	SSBP3	chr1	54691103	54872068	-	H3K4me3-only	H3K4me3-only	Bivalent	H3K4me3-only	H3K4me3-only	H3K4me3-only	H3K4me3-only	H3K4me3-only	H3K4me3-only	H3K4me3-only	H3K4me3-only	H3K4me3-only	H3K4me3-only	H3K4me3-only	H3K4me3-only	H3K4me3-only	H3K4me3-only	H3K4me3-only	H3K4me3-only	H3K4me3-only
NM_001009958	ZNF655	chr7	99156447	99162328	+	H3K4me3-only	H3K4me3-only	H3K4me3-only	H3K4me3-only	H3K4me3-only	H3K4me3-only	H3K4me3-only	H3K4me3-only	H3K4me3-only	H3K4me3-only	H3K4me3-only	H3K4me3-only	H3K4me3-only	H3K4me3-only	H3K4me3-only	H3K4me3-only	H3K4me3-only	H3K4me3-only	H3K4me3-only	H3K4me3-only
NM_001009959	ERMN	chr2	158175124	158184146	-	Unmarked	Unmarked	Unmarked	Unmarked	Unmarked	Unmarked	Unmarked	Unmarked	Unmarked	Unmarked	Unmarked	Unmarked	Unmarked	Unmarked	Unmarked	Unmarked	Unmarked	Unmarked	Unmarked	Unmarked
NM_001009984	C20orf194	chr20	3229947	3388309	-	H3K4me3-only	H3K4me3-only	Bivalent	H3K4me3-only	H3K4me3-only	H3K4me3-only	H3K4me3-only	H3K4me3-only	H3K4me3-only	H3K4me3-only	H3K4me3-only	H3K4me3-only	H3K4me3-only	H3K4me3-only	H3K4me3-only	H3K4me3-only	H3K4me3-only	H3K4me3-only	H3K4me3-only	H3K4me3-only
NM_001009992	ZNF648	chr1	182023704	182030847	-	Unmarked	Unmarked	Unmarked	Unmarked	Unmarked	H3K27me3-only	Unmarked	Unmarked	Unmarked	Unmarked	Unmarked	Unmarked	H3K4me3-only	Unmarked	Unmarked	Unmarked	Unmarked	Unmarked	Unmarked	Unmarked
NM_001009993	FAM168B	chr2	131805448	131851004	-	H3K4me3-only	H3K4me3-only	H3K4me3-only	H3K4me3-only	H3K4me3-only	H3K4me3-only	H3K4me3-only	H3K4me3-only	H3K4me3-only	H3K4me3-only	H3K4me3-only	H3K4me3-only	H3K4me3-only	H3K4me3-only	H3K4me3-only	H3K4me3-only	H3K4me3-only	H3K4me3-only	H3K4me3-only	H3K4me3-only
NM_001009994	RIPPLY2	chr6	84562984	84567234	+	Bivalent	Bivalent	Bivalent	Bivalent	Bivalent	Bivalent	Bivalent	Bivalent	Bivalent	Bivalent	Bivalent	Bivalent	Bivalent	Bivalent	Bivalent	H3K4me3-only	H3K4me3-only	H3K4me3-only	H3K4me3-only	H3K4me3-only
NM_001009997	C10orf62	chr10	99349449	99350691	+	Unmarked	Unmarked	Unmarked	Unmarked	H3K4me3-only	Unmarked	Unmarked	Unmarked	Unmarked	Unmarked	Unmarked	Unmarked	Unmarked	Unmarked	Unmarked	Unmarked	Unmarked	Unmarked	Unmarked	Unmarked
NM_001009998	SSBP4	chr19	18530145	18545372	+	Bivalent	Bivalent	Bivalent	H3K4me3-only	H3K4me3-only	H3K4me3-only	H3K4me3-only	H3K4me3-only	H3K4me3-only	H3K4me3-only	H3K4me3-only	H3K4me3-only	H3K4me3-only	H3K4me3-only	H3K4me3-only	H3K4me3-only	H3K4me3-only	H3K4me3-only	H3K4me3-only	H3K4me3-only
NM_001010	RPS6	chr9	19376253	19380235	-	H3K4me3-only	H3K4me3-only	H3K4me3-only	H3K4me3-only	H3K4me3-only	H3K4me3-only	H3K4me3-only	H3K4me3-only	H3K4me3-only	H3K4me3-only	H3K4me3-only	H3K4me3-only	H3K4me3-only	H3K4me3-only	H3K4me3-only	H3K4me3-only	H3K4me3-only	H3K4me3-only	H3K4me3-only	H3K4me3-only
NM_001010000	ARHGAP28	chr18	6834431	6915712	+	Unmarked	Unmarked	Unmarked	Unmarked	Unmarked	Unmarked	Unmarked	Unmarked	Unmarked	Unmarked	Unmarked	Unmarked	Unmarked	Unmarked	Unmarked	Unmarked	Unmarked	Unmarked	Unmarked	Unmarked
NM_001010844	IRAK1BP1	chr6	79577260	79608135	+	H3K4me3-only	H3K4me3-only	H3K4me3-only	H3K4me3-only	H3K4me3-only	H3K4me3-only	H3K4me3-only	H3K4me3-only	H3K4me3-only	H3K4me3-only	H3K4me3-only	H3K4me3-only	H3K4me3-only	H3K4me3-only	H3K4me3-only	H3K4me3-only	H3K4me3-only	H3K4me3-only	H3K4me3-only	H3K4me3-only
NM_001010845	ACSM2A	chr16	20462858	20498991	+	Unmarked	Unmarked	Unmarked	Unmarked	Unmarked	Unmarked	Unmarked	Unmarked	Unmarked	Unmarked	Unmarked	Unmarked	Unmarked	Unmarked	Unmarked	Unmarked	Unmarked	Unmarked	Unmarked	Unmarked
NM_001010846	SHE	chr1	154451953	154474526	-	Bivalent	Bivalent	Bivalent	Bivalent	Bivalent	Bivalent	Bivalent	Bivalent	Bivalent	Bivalent	Bivalent	Bivalent	H3K4me3-only	H3K27me3-only	H3K4me3-only	H3K4me3-only	H3K4me3-only	H3K4me3-only	H3K4me3-only	H3K4me3-only
NM_001010847	LRRC38	chr1	13801444	13840242	-	Bivalent	Bivalent	Bivalent	H3K27me3-only	H3K27me3-only	Bivalent	H3K27me3-only	H3K27me3-only	H3K27me3-only	H3K27me3-only	H3K27me3-only	Unmarked	Bivalent	Unmarked	Unmarked	Unmarked	H3K4me3-only	Unmarked	Unmarked	Unmarked
NM_001010851	ZNF766	chr19	52772823	52795976	+	H3K4me3-only	H3K4me3-only	H3K4me3-only	H3K4me3-only	H3K4me3-only	H3K4me3-only	H3K4me3-only	H3K4me3-only	H3K4me3-only	H3K4me3-only	H3K4me3-only	H3K4me3-only	H3K4me3-only	H3K4me3-only	H3K4me3-only	H3K4me3-only	H3K4me3-only	H3K4me3-only	H3K4me3-only	H3K4me3-only
NM_001010852	CLVS2	chr6	123317581	123385063	+	Bivalent	Bivalent	H3K4me3-only	Bivalent	Bivalent	Bivalent	Bivalent	Bivalent	Bivalent	Bivalent	H3K27me3-only	Bivalent	Bivalent	H3K27me3-only	H3K27me3-only	Unmarked	H3K4me3-only	Unmarked	H3K4me3-only	H3K4me3-only
NM_001010853	PM20D2	chr6	89855768	89875288	+	Bivalent	Bivalent	Bivalent	H3K4me3-only	H3K4me3-only	H3K4me3-only	H3K4me3-only	H3K4me3-only	H3K4me3-only	H3K4me3-only	H3K4me3-only	H3K4me3-only	H3K4me3-only	H3K4me3-only	H3K4me3-only	H3K4me3-only	H3K4me3-only	H3K4me3-only	H3K4me3-only	H3K4me3-only
NM_001010854	TTC7B	chr14	91006931	91282761	-	H3K4me3-only	Bivalent	H3K4me3-only	Bivalent	H3K4me3-only	H3K4me3-only	Bivalent	H3K4me3-only	H3K4me3-only	H3K4me3-only	H3K4me3-only	H3K4me3-only	H3K4me3-only	H3K4me3-only	H3K4me3-only	H3K4me3-only	H3K4me3-only	H3K4me3-only	H3K4me3-only	H3K4me3-only
NM_001010855	PIK3R6	chr17	8706054	8770994	-	Unmarked	Unmarked	Unmarked	Unmarked	H3K27me3-only	H3K4me3-only	Unmarked	Unmarked	H3K27me3-only	Unmarked	H3K4me3-only	Unmarked	Unmarked	H3K27me3-only	Unmarked	Unmarked	Unmarked	H3K4me3-only	Unmarked	Unmarked
[truncated: 26,618 more rows]

## Sheet: Bivalency Resolution
Supplemental Table 9B. Bivalent gene promoters in human ESCs and their resolution across various cell types
[truncated: 4,334 more rows]
