# Supplementary material for: Decoding the function of bivalent chromatin in development and cancer
Source: HighWire-hosted journal article supplement (doi:10.1101/gr.275736.121), 2021-10-19
Supplement: Supplemental_Table_S10.xlsx [file Supplemental_Table_S10.xlsx]

## Sheet: Promoter Motif Analysis
Supplemental Table 10. Results from sequence motif enrichment analysis
JASPAR Motif Accession	TF Name	Number of Promoters Containing Motif						Percent of Promoters Containing Motif						Log2 Fold Enrichment Over Expected
		H3K4me3-only (N = 13,423)	Bivalent (N = 4,331)	H3K27me3-only (N = 519)	Unmarked (N = 9,862)	H4K4me3 Resolving (N = 3,006)	Mostly H4K27me3 Resolving (N = 270)	H3K4me3-only	Bivalent	H3K27me3-only	Unmarked	Mostly H4K4me3 Resolving	Mostly H4K27me3 Resolving	H3K4me3-only	Bivalent	H3K27me3-only	Unmarked	Mostly H4K4me3 Resolving	Mostly H4K27me3 Resolving
MA1513.1	KLF15	9422	3238	162	1224	2331	164	70.193	74.7633	31.2139	12.4113	77.5449	60.7407	0.491605	-1.04933	-5.37036	-2.45283	-1.52348	-5.35266
MA1653.1	ZNF148	9708	3556	307	3198	2459	229	72.3236	82.1057	59.1522	32.4275	81.8031	84.8148	0.279108	-1.16981	-4.70376	-1.3229	-1.70199	-5.12665
MA1564.1	SP9	7881	2434	164	1705	1747	119	58.7127	56.1995	31.5992	17.2886	58.1171	44.0741	0.439122	-1.25593	-5.14749	-1.76949	-1.73438	-5.61022
MA0746.2	SP3	8157	2464	185	2069	1789	121	60.7688	56.8922	35.6455	20.9795	59.5143	44.8148	0.409197	-1.31784	-5.05324	-1.56991	-1.77969	-5.66576
MA0599.1	KLF5	9605	3293	320	3399	2307	196	71.5563	76.0332	61.657	34.4656	76.7465	72.5926	0.276856	-1.26753	-4.63079	-1.22182	-1.78091	-5.338
MA0741.1	KLF16	8097	2730	223	2467	1931	169	60.3218	63.0339	42.9672	25.0152	64.2382	62.5926	0.328343	-1.24014	-4.85393	-1.38629	-1.7397	-5.25395
MA0685.1	SP4	7506	1937	144	1777	1392	95	55.9189	44.7241	27.7457	18.0187	46.3074	35.1852	0.469304	-1.48492	-5.2346	-1.6093	-1.96158	-5.83467
MA0162.4	EGR1	6310	2517	158	1412	1810	133	47.0089	58.1159	30.4432	14.3176	60.2129	49.2593	0.347203	-0.978731	-4.97244	-1.8127	-1.45445	-5.22094
MA0079.4	SP1	7691	1924	156	2059	1408	86	57.2972	44.4239	30.0578	20.8781	46.8397	31.8519	0.446452	-1.55261	-5.1771	-1.45478	-2.00307	-6.03624
MA0506.1	NRF1	5019	1524	51	454	1153	58	37.391	35.1882	9.82659	4.60353	38.3566	21.4815	0.577845	-1.14169	-6.04291	-2.88879	-1.54416	-5.85736
MA0471.2	E2F6	7583	2665	204	2522	1888	151	56.4926	61.5331	39.3064	25.5729	62.8077	55.9259	0.292876	-1.21576	-4.92325	-1.29532	-1.71303	-5.35727
MA1650.1	ZBTB14	4407	1895	65	375	1392	97	32.8317	43.7543	12.5241	3.80247	46.3074	35.9259	0.454279	-0.76332	-5.62893	-3.10056	-1.20836	-5.05139
MA1522.1	MAZ	7818	2953	274	2919	2003	201	58.2433	68.1829	52.7938	29.5985	66.6334	74.4444	0.230818	-1.1738	-4.60373	-1.19051	-1.73382	-5.05071
MA0039.4	KLF4	8848	3036	296	3548	2129	189	65.9167	70.0993	57.0328	35.9765	70.825	70	0.237747	-1.30543	-4.66394	-1.0806	-1.81743	-5.31115
MA0740.1	KLF14	6100	1609	93	1327	1194	69	45.4444	37.1508	17.9191	13.4557	39.7206	25.5556	0.486011	-1.43663	-5.54942	-1.71463	-1.867	-5.98006
MA1512.1	KLF11	6559	2130	162	1930	1555	111	48.8639	49.1803	31.2139	19.5701	51.7299	41.1111	0.350716	-1.27191	-4.98869	-1.41416	-1.72585	-5.53413
MA1102.2	CTCFL	5593	2196	154	1447	1534	143	41.6673	50.7042	29.6724	14.6725	51.0313	52.963	0.320156	-1.02859	-4.86246	-1.6304	-1.54617	-4.96938
MA0516.2	SP2	7209	2194	203	2392	1516	145	53.7063	50.658	39.1137	24.2547	50.4325	53.7037	0.332736	-1.3835	-4.81751	-1.25885	-1.91679	-5.30294
MA0732.1	EGR3	4711	1707	102	802	1245	92	35.0965	39.4135	19.6532	8.13222	41.4172	34.0741	0.431454	-1.03312	-5.09794	-2.1229	-1.48843	-5.2468
MA0747.1	SP8	6765	2035	190	2203	1441	118	50.3986	46.9868	36.6089	22.3383	47.9375	43.7037	0.341224	-1.39184	-4.81279	-1.2774	-1.8898	-5.50001
MA1515.1	KLF2	7009	2133	188	2436	1541	90	52.2163	49.2496	36.2235	24.7009	51.2641	33.3333	0.320315	-1.39601	-4.90009	-1.20438	-1.86503	-5.96282
MA1627.1	Wt1	7637	2834	276	3176	1943	182	56.8949	65.4352	53.1792	32.2044	64.6374	67.4074	0.201267	-1.2289	-4.589	-1.06453	-1.77345	-5.18973
MA0146.2	Zfx	6573	1917	157	2277	1414	74	48.9682	44.2623	30.2505	23.0886	47.0393	27.4074	0.334781	-1.44292	-5.05293	-1.19464	-1.88199	-6.1381
MA1122.1	TFDP1	4054	1302	64	566	951	69	30.2019	30.0623	12.3314	5.7392	31.6367	25.5556	0.505413	-1.1332	-5.47972	-2.33506	-1.58642	-5.37119
MA1596.1	ZNF460	8608	3000	259	4030	2139	169	64.1287	69.2681	49.9037	40.8639	71.1577	62.5926	0.182654	-1.33806	-4.872	-0.912244	-1.82609	-5.48793
MA0632.2	TCFL5	2975	1158	37	342	839	64	22.1635	26.7375	7.12909	3.46786	27.9108	23.7037	0.466781	-0.894473	-5.86244	-2.65404	-1.35937	-5.07189
MA0750.2	ZBTB7A	5544	961	98	1711	723	50	41.3022	22.1889	18.8825	17.3494	24.0519	18.5185	0.483043	-2.04528	-5.33896	-1.21304	-2.45582	-6.30981
MA1511.1	KLF10	5745	1769	163	2319	1294	88	42.7997	40.8451	31.4066	23.5145	43.0472	32.5926	0.268615	-1.43076	-4.87075	-1.04019	-1.88185	-5.76004
MA1516.1	KLF3	4341	1469	103	1420	1084	53	32.34	33.9183	19.8459	14.3987	36.0612	19.6296	0.311283	-1.25191	-5.08603	-1.30085	-1.69038	-6.04461
MA0528.2	ZNF263	7294	2650	259	3761	1818	170	54.3396	61.1868	49.9037	38.1363	60.479	62.963	0.130729	-1.32999	-4.68496	-0.824865	-1.87363	-5.29237
MA1630.1	Znf281	5786	2109	209	2630	1428	132	43.1051	48.6955	40.2697	26.668	47.505	48.8889	0.176109	-1.2799	-4.61488	-0.961394	-1.84246	-5.27785
MA0076.2	ELK4	5112	723	82	1566	557	39	38.0839	16.6936	15.7996	15.8791	18.5296	14.4444	0.51793	-2.30389	-5.44419	-1.18887	-2.68021	-6.51634
MA0131.2	HINFP	2534	916	32	249	679	44	18.878	21.1498	6.1657	2.52484	22.5882	16.2963	0.509513	-0.958484	-5.79769	-2.83769	-1.39042	-5.33826
MA0748.2	YY2	3539	549	52	638	408	24	26.3652	12.6761	10.0193	6.46928	13.5729	8.88889	0.634594	-2.05387	-5.45409	-1.83712	-2.48211	-6.56957
MA0028.2	ELK1	3757	339	45	730	262	16	27.9893	7.82729	8.67052	7.40215	8.7159	5.92593	0.693022	-2.7772	-5.69049	-1.67059	-3.14892	-7.18234
MA0163.1	PLAG1	4788	1777	167	2091	1221	105	35.6701	41.0298	32.1773	21.2026	40.6188	38.8889	0.185813	-1.24417	-4.65569	-1.00942	-1.78555	-5.32515
MA0472.2	EGR2	2744	1045	61	639	761	48	20.4425	24.1284	11.7534	6.47942	25.316	17.7778	0.357545	-1.03523	-5.13378	-1.74485	-1.49277	-5.47956
MA0733.1	EGR4	3236	1133	90	1049	803	62	24.1079	26.1602	17.341	10.6368	26.7132	22.963	0.300342	-1.21372	-4.8678	-1.32486	-1.7104	-5.40546
MA0759.1	ELK3	3540	315	44	826	242	15	26.3726	7.27315	8.47784	8.37558	8.05057	5.55556	0.651094	-2.83923	-5.67901	-1.44844	-3.21958	-7.23155
MA0753.2	ZNF740	4174	1662	184	1917	1118	123	31.0959	38.3745	35.4528	19.4382	37.1923	45.5556	0.140496	-1.18801	-4.36316	-0.982085	-1.76001	-4.9442
MA1584.1	ZIC5	2778	1114	66	919	778	54	20.6958	25.7215	12.7168	9.3186	25.8816	20	0.255711	-1.06259	-5.13973	-1.3402	-1.58049	-5.42923
MA1483.1	ELF2	4159	572	70	1406	437	25	30.9841	13.2071	13.4875	14.2567	14.5376	9.25926	0.489999	-2.37215	-5.40274	-1.07464	-2.76053	-6.88817
MA0742.1	Klf12	4353	1005	112	1799	741	46	32.4294	23.2048	21.58	18.2417	24.6507	17.037	0.327912	-1.7869	-4.95253	-0.946903	-2.22655	-6.23632
MA0475.2	FLI1	3669	380	55	1109	294	22	27.3337	8.77396	10.5973	11.2452	9.78044	8.14815	0.560932	-2.71038	-5.49888	-1.1652	-3.08057	-6.82081
MA0527.1	ZBTB33	2001	549	29	290	398	28	14.9072	12.6761	5.58767	2.94058	13.2402	10.3704	0.547832	-1.31801	-5.56069	-2.23876	-1.78205	-5.61132
MA0814.2	TFAP2C(var.2)	4609	1358	160	2158	995	68	34.3366	31.3553	30.8285	21.882	33.1005	25.1852	0.221611	-1.54136	-4.6267	-0.873148	-1.99007	-5.86116
MA1514.1	KLF17	4745	1812	181	2519	1217	130	35.3498	41.8379	34.8748	25.5425	40.4857	48.1481	0.103522	-1.2853	-4.60882	-0.810035	-1.85956	-5.0863
MA0641.1	ELF4	4118	574	73	1555	438	30	30.6787	13.2533	14.0655	15.7676	14.5709	11.1111	0.449678	-2.39314	-5.36823	-0.955351	-2.78326	-6.65116
MA0810.1	TFAP2A(var.2)	3116	1248	130	1308	886	67	23.2139	28.8155	25.0482	13.263	29.4744	24.8148	0.170804	-1.14927	-4.41231	-1.08153	-1.64351	-5.36859
MA0156.2	FEV	3332	298	50	959	227	17	24.8231	6.88063	9.63391	9.72419	7.55156	6.2963	0.590233	-2.89277	-5.46808	-1.20655	-3.28539	-7.02448
MA0763.1	ETV3	3376	311	54	1084	241	16	25.1509	7.18079	10.4046	10.9917	8.0173	5.92593	0.552445	-2.88788	-5.41377	-1.08651	-3.25577	-7.16865
MA0815.1	TFAP2C(var.3)	2265	940	89	808	669	54	16.874	21.704	17.1484	8.19306	22.2555	20	0.210842	-1.05794	-4.45872	-1.27624	-1.54859	-5.17957
MA1484.1	ETS2	3430	426	63	1219	305	23	25.5532	9.83607	12.1387	12.3606	10.1464	8.51852	0.484661	-2.52462	-5.28205	-1.00785	-3.00667	-6.73577
MA0697.1	ZIC3	2541	1056	85	1046	745	54	18.9302	24.3824	16.3776	10.6064	24.7838	20	0.171825	-1.09496	-4.72996	-1.10869	-1.59826	-5.38447
MA0872.1	TFAP2A(var.3)	2291	946	92	836	669	54	17.0677	21.8425	17.7264	8.47698	22.2555	20	0.20532	-1.07075	-4.43288	-1.24908	-1.57058	-5.20155
MA0813.1	TFAP2B(var.3)	2520	988	107	994	698	56	18.7737	22.8123	20.6166	10.0791	23.2202	20.7407	0.196629	-1.15421	-4.36111	-1.14548	-1.6555	-5.29522
MA1099.2	HES1	1929	628	45	512	458	28	14.3709	14.5001	8.67052	5.19164	15.2362	10.3704	0.376743	-1.24227	-5.04504	-1.53689	-1.69769	-5.72954
MA0696.1	ZIC1	2526	1016	77	1099	698	50	18.8184	23.4588	14.8362	11.1438	23.2202	18.5185	0.166338	-1.14762	-4.86951	-1.03433	-1.68922	-5.49244
MA0812.1	TFAP2B(var.2)	2671	976	98	1150	704	52	19.8987	22.5352	18.8825	11.6609	23.4198	19.2593	0.19373	-1.2587	-4.57472	-1.02202	-1.73	-5.48899
MA0098.3	ETS1	3652	410	62	1435	309	24	27.207	9.46664	11.9461	14.5508	10.2794	8.88889	0.46152	-2.69347	-5.41875	-0.886116	-3.10149	-6.78799
MA1548.1	PLAGL2	2570	1069	97	1167	739	65	19.1462	24.6825	18.6898	11.8333	24.5842	24.0741	0.135762	-1.12974	-4.59188	-1.0032	-1.66236	-5.16942
MA0760.1	ERF	3488	389	60	1387	302	17	25.9852	8.98176	11.5607	14.0641	10.0466	6.2963	0.457548	-2.70701	-5.40375	-0.872884	-3.07223	-7.22317
MA0645.1	ETV6	4341	669	88	2041	505	33	32.34	15.4468	16.9557	20.6956	16.7997	12.2222	0.349964	-2.34799	-5.27442	-0.738787	-2.75371	-6.68945
MA1517.1	KLF6	3663	1090	106	1875	776	56	27.289	25.1674	20.4239	19.0124	25.815	20.7407	0.189221	-1.55948	-4.92167	-0.776914	-2.04968	-5.84223
MA0474.2	ERG	3442	386	66	1382	295	25	25.6426	8.91249	12.7168	14.0134	9.81371	9.25926	0.451461	-2.70511	-5.25318	-0.865028	-3.093	-6.65371
MA0736.1	GLIS2	1970	756	57	749	523	45	14.6763	17.4556	10.9827	7.59481	17.3985	16.6667	0.225369	-1.15637	-4.88572	-1.16979	-1.68794	-5.22676
MA1107.2	KLF9	6007	2118	242	3722	1462	135	44.7515	48.9033	46.6281	37.7408	48.6361	50	0.0586805	-1.44526	-4.57489	-0.631886	-1.98002	-5.41693
MA1569.1	TFAP2E	2159	765	62	863	556	33	16.0843	17.6634	11.9461	8.75076	18.4963	12.2222	0.233538	-1.26329	-4.88841	-1.08939	-1.72367	-5.79822
MA0751.1	ZIC4	2227	885	63	980	610	47	16.5909	20.4341	12.1387	9.93713	20.2927	17.4074	0.167912	-1.16344	-4.97569	-1.01634	-1.70031	-5.39839
MA0155.1	INSM1	4187	1456	185	2355	1011	94	31.1927	33.6181	35.6455	23.8795	33.6327	34.8148	0.100946	-1.42296	-4.39937	-0.729244	-1.94919	-5.37617
MA1615.1	Plagl1	4050	1466	181	2300	1007	93	30.1721	33.849	34.8748	23.3218	33.4997	34.4444	0.0861218	-1.37991	-4.39774	-0.730166	-1.92174	-5.35843
MA0694.1	ZBTB7B	2074	671	48	853	467	47	15.4511	15.493	9.24855	8.64936	15.5356	17.4074	0.25376	-1.37427	-5.17948	-1.02804	-1.89716	-5.20985
MA0765.2	ETV5	4449	688	108	2192	525	31	33.1446	15.8855	20.8092	22.2267	17.4651	11.4815	0.326419	-2.36658	-5.03796	-0.694814	-2.75667	-6.83865
MA1599.1	ZNF682	3682	1261	138	2063	900	81	27.4305	29.1157	26.5896	20.9187	29.9401	30	0.111416	-1.4345	-4.62633	-0.724329	-1.92108	-5.39501
MA1583.1	ZFP57	1344	458	23	344	334	22	10.0127	10.5749	4.4316	3.48814	11.1111	8.14815	0.377162	-1.17595	-5.49159	-1.58889	-1.63145	-5.55572
MA0149.1	EWSR1-FLI1	8571	2957	347	5716	2024	196	63.8531	68.2752	66.8593	57.9598	67.332	72.5926	0.0303568	-1.50497	-4.5961	-0.554101	-2.0519	-5.42018
MA0735.1	GLIS1	1391	516	23	468	382	32	10.3628	11.9141	4.4316	4.74549	12.7079	11.8519	0.28195	-1.14873	-5.6364	-1.28959	-1.58253	-5.15996
MA0057.1	MZF1(var.2)	4023	1356	173	2351	891	112	29.9709	31.3092	33.3333	23.839	29.6407	41.4815	0.0935301	-1.47538	-4.4459	-0.681467	-2.08124	-5.07317
MA0616.2	HES2	1473	495	36	507	363	27	10.9737	11.4292	6.93642	5.14095	12.0758	10	0.298154	-1.2751	-5.05646	-1.24055	-1.72256	-5.4715
MA0811.1	TFAP2B	2381	941	115	1235	669	45	17.7382	21.7271	22.158	12.5228	22.2555	16.6667	0.0951862	-1.24411	-4.27668	-0.85187	-1.7363	-5.63031
MA0657.1	KLF13	2622	645	77	1248	475	28	19.5336	14.8926	14.8362	12.6546	15.8017	10.3704	0.259204	-1.76409	-4.83046	-0.811846	-2.20546	-6.28989
MA0695.1	ZBTB7C	2079	645	44	966	442	45	15.4883	14.8926	8.47784	9.79517	14.7039	16.6667	0.222827	-1.46569	-5.33942	-0.882968	-2.01094	-5.30699
MA1578.1	VEZF1	1869	693	93	850	458	51	13.9239	16.0009	17.9191	8.61894	15.2362	18.8889	0.160511	-1.27083	-4.16838	-0.976221	-1.86834	-5.03511
MA0493.1	Klf1	4730	1314	191	2815	940	64	35.238	30.3394	36.8015	28.5439	31.2708	23.7037	0.131581	-1.71629	-4.49861	-0.617124	-2.19953	-6.07604
MA0608.1	Creb3l2	1684	377	43	643	265	19	12.5456	8.70469	8.28516	6.51998	8.8157	7.03704	0.361694	-1.79756	-4.92972	-1.02731	-2.30613	-6.10805
MA0504.1	NR2C2	4725	1541	181	2966	1039	101	35.2008	35.5807	34.8748	30.075	34.5642	37.4074	0.0733186	-1.54313	-4.63293	-0.598477	-2.1118	-5.47457
MA0524.2	TFAP2C	2280	922	119	1237	654	50	16.9858	21.2884	22.9287	12.5431	21.7565	18.5185	0.0682917	-1.2379	-4.19171	-0.813897	-1.73338	-5.44267
MA1464.1	ARNT2	1518	326	51	524	234	21	11.3089	7.52713	9.82659	5.31332	7.78443	7.77778	0.39542	-1.82381	-4.50011	-1.13911	-2.30217	-5.78022
MA0686.1	SPDEF	2168	351	57	913	244	18	16.1514	8.10436	10.9827	9.25776	8.1171	6.66667	0.38121	-2.24561	-4.86805	-0.866468	-2.7702	-6.53101
MA0147.3	MYC	1797	562	61	831	408	24	13.3875	12.9762	11.7534	8.42628	13.5729	8.88889	0.212366	-1.46458	-4.66827	-0.900304	-1.92658	-6.01405
MA1474.1	CREB3L4	1702	403	39	714	287	25	12.6797	9.30501	7.51445	7.23991	9.54757	9.25926	0.319884	-1.7585	-5.12773	-0.933351	-2.24822	-5.76928
MA0470.2	E2F4	1014	185	13	222	126	14	7.5542	4.27153	2.50482	2.25106	4.19162	5.18519	0.567671	-1.88679	-5.71773	-1.62375	-2.44089	-5.61082
MA0638.1	CREB3	1614	341	32	656	242	20	12.0241	7.87347	6.1657	6.65179	8.05057	7.40741	0.356123	-1.88667	-5.3003	-0.94275	-2.38144	-5.97837
MA0636.1	BHLHE41	1206	255	40	380	191	13	8.98458	5.88779	7.70713	3.85317	6.35396	4.81481	0.426389	-1.81527	-4.4877	-1.23977	-2.2322	-6.10919
MA0139.1	CTCF	3486	1147	132	2147	806	69	25.9703	26.4835	25.4335	21.7704	26.813	25.5556	0.0801282	-1.52358	-4.64283	-0.619122	-2.03259	-5.5787
MA0864.2	E2F2	971	191	15	244	127	14	7.23385	4.41007	2.89017	2.47414	4.22488	5.18519	0.518295	-1.8276	-5.49814	-1.47429	-2.41635	-5.59768
MA0622.1	Mlxip	1512	520	52	724	369	30	11.2642	12.0065	10.0193	7.34131	12.2754	11.1111	0.174574	-1.3653	-4.68723	-0.887823	-1.86019	-5.48078
MA0014.3	PAX5	1559	466	40	749	328	33	11.6144	10.7596	7.70713	7.59481	10.9115	12.2222	0.215657	-1.52656	-5.06882	-0.841926	-2.0332	-5.34635
MA0637.1	CENPB	1123	289	35	396	205	20	8.36624	6.67282	6.74374	4.01541	6.81969	7.40741	0.352961	-1.60526	-4.6509	-1.15082	-2.1007	-5.45825
MA0024.3	E2F1	795	211	15	201	141	16	5.92267	4.87185	2.89017	2.03813	4.69062	5.92593	0.447441	-1.46627	-5.28048	-1.53632	-2.04782	-5.18737
MA0502.2	NFYB	3276	756	116	1870	510	55	24.4059	17.4556	22.3507	18.9617	16.9661	20.3704	0.19031	-1.92517	-4.62943	-0.618587	-2.49306	-5.70605
MA0464.2	BHLHE40	1138	268	40	419	201	16	8.47799	6.18795	7.70713	4.24863	6.68663	5.92593	0.354984	-1.73121	-4.47537	-1.08649	-2.14625	-5.7973
MA1529.1	NHLH2	2694	995	98	1711	696	49	20.07	22.9739	18.8825	17.3494	23.1537	18.1481	0.0385018	-1.39848	-4.74232	-0.616408	-1.91409	-5.74232
MA0603.1	Arntl	1626	337	62	738	245	17	12.1135	7.78111	11.9461	7.48327	8.15037	6.2963	0.302751	-1.96776	-4.41016	-0.836884	-2.42772	-6.2769
MA0103.3	ZEB1	3970	1512	140	2736	998	93	29.5761	34.9111	26.975	27.7429	33.2003	34.4444	-0.00635993	-1.39904	-4.832	-0.543431	-1.99839	-5.42212
MA0104.4	MYCN	1233	349	37	561	261	16	9.18573	8.05819	7.12909	5.6885	8.68263	5.92593	0.245503	-1.57537	-4.813	-0.890597	-1.99455	-6.02245
MA0871.2	TFEC	1804	439	73	913	326	16	13.4396	10.1362	14.0655	9.25776	10.845	5.92593	0.227771	-1.81114	-4.39939	-0.754742	-2.24048	-6.58921
MA1475.1	CREB3L4(var.2)	1623	289	41	758	217	18	12.0912	6.67282	7.89981	7.68607	7.2189	6.66667	0.327497	-2.16202	-4.9794	-0.770897	-2.5754	-6.16703
MA1509.1	IRF6	1399	369	34	686	271	21	10.4224	8.51997	6.55106	6.95599	9.0153	7.77778	0.237068	-1.68563	-5.12565	-0.791047	-2.13096	-5.82079
MA1491.1	GLI3	2607	848	98	1611	582	52	19.4219	19.5798	18.8825	16.3354	19.3613	19.2593	0.0815604	-1.53869	-4.6519	-0.612874	-2.08174	-5.56617
MA0058.3	MAX	1357	381	52	654	278	21	10.1095	8.79704	10.0193	6.63151	9.24817	7.77778	0.218835	-1.61372	-4.48693	-0.834223	-2.06843	-5.79505
MA0649.1	HEY2	1110	361	35	528	263	18	8.26939	8.33526	6.74374	5.35388	8.74917	6.66667	0.193899	-1.42659	-4.79316	-0.878051	-1.88353	-5.75252
MA1106.1	HIF1A	932	299	30	397	223	14	6.94331	6.90372	5.78035	4.02555	7.4185	5.18519	0.236617	-1.40357	-4.72068	-0.994574	-1.82667	-5.82021
MA0664.1	MLXIPL	1244	232	38	535	171	11	9.26767	5.35673	7.32177	5.42486	5.68862	4.07407	0.347725	-2.07506	-4.68512	-0.86965	-2.51519	-6.47361
MA0823.1	HEY1	1167	393	34	598	276	24	8.69403	9.07412	6.55106	6.06368	9.18164	8.88889	0.158216	-1.41199	-4.94291	-0.806372	-1.92185	-5.44541
MA0663.1	MLX	1314	244	41	597	176	13	9.78917	5.6338	7.89981	6.05354	5.85496	4.81481	0.326746	-2.10227	-4.67545	-0.811416	-2.57357	-6.33256
MA1560.1	SOHLH2	915	369	44	435	264	21	6.81666	8.51997	8.47784	4.41087	8.78244	7.77778	0.12147	-1.18868	-4.25673	-0.951286	-1.67176	-5.32384
MA0259.1	ARNT::HIF1A	792	277	25	332	209	14	5.90032	6.39575	4.81696	3.36646	6.95276	5.18519	0.219257	-1.29636	-4.76624	-1.03506	-1.70274	-5.60274
MA0734.2	GLI2	2634	852	94	1681	586	53	19.623	19.6721	18.1118	17.0452	19.4943	19.6296	0.0695771	-1.55875	-4.73887	-0.578359	-2.09871	-5.56554
MA0048.2	NHLH1	2820	1051	102	1902	714	61	21.0087	24.2669	19.6532	19.2861	23.7525	22.5926	0.00876513	-1.41517	-4.78029	-0.559413	-1.97293	-5.52198
MA1466.1	ATF6	1325	311	29	670	225	17	9.87112	7.18079	5.58767	6.79375	7.48503	6.2963	0.250229	-1.84078	-5.26357	-0.733531	-2.30777	-6.03409
MA0758.1	E2F7	2151	560	75	1273	373	52	16.0247	12.93	14.4509	12.9081	12.4085	19.2593	0.151542	-1.78997	-4.69043	-0.605233	-2.37622	-5.21881
MA0825.1	MNT	1244	411	53	696	288	23	9.26767	9.48973	10.2119	7.05739	9.58084	8.51852	0.117208	-1.48057	-4.43564	-0.720619	-1.99364	-5.64
MA0863.1	MTF1	1562	603	69	979	411	38	11.6367	13.9229	13.2948	9.92699	13.6727	14.0741	0.0271323	-1.34603	-4.47352	-0.646881	-1.89905	-5.33412
MA0604.1	Atf1	1114	134	13	505	102	7	8.29919	3.09397	2.50482	5.12067	3.39321	2.59259	0.402923	-2.65252	-6.01817	-0.738471	-3.04619	-6.91126
MA0116.1	Znf423	1991	689	102	1255	469	46	14.8327	15.9086	19.6532	12.7256	15.6021	17.037	0.0478685	-1.48305	-4.23898	-0.617937	-2.03796	-5.38785
MA0003.4	TFAP2A	3713	1012	170	2391	725	59	27.6615	23.3664	32.7553	24.2446	24.1184	21.8519	0.0951171	-1.78026	-4.35386	-0.539854	-2.26142	-5.88061
MA1544.1	OVOL1	831	160	13	370	121	7	6.19087	3.6943	2.50482	3.75177	4.02528	2.59259	0.342197	-2.03458	-5.65607	-0.825126	-2.43764	-6.54915
MA0060.3	NFYA	3213	683	94	1999	456	54	23.9365	15.77	18.1118	20.2697	15.1697	20	0.169265	-2.0647	-4.92585	-0.515378	-2.64755	-5.72555
MA0107.1	RELA	2966	957	117	1994	699	62	22.0964	22.0965	22.5434	20.219	23.2535	22.963	0.0430627	-1.58887	-4.62088	-0.52979	-2.04209	-5.53704
MA0865.1	E2F8	2810	787	109	1813	556	63	20.9342	18.1713	21.0019	18.3837	18.4963	23.3333	0.0938221	-1.74231	-4.59435	-0.538369	-2.24359	-5.38525
MA0844.1	XBP1	1169	269	30	634	197	13	8.70893	6.21104	5.78035	6.42872	6.55356	4.81481	0.221171	-1.89843	-5.063	-0.661549	-2.34784	-6.26945
MA0105.4	NFKB1	1874	663	75	1240	463	46	13.9611	15.3082	14.4509	12.5735	15.4025	17.037	0.0281721	-1.47087	-4.61491	-0.567609	-1.98886	-5.32017
MA0778.1	NFKB2	1770	623	71	1163	441	48	13.1863	14.3847	13.6802	11.7927	14.6707	17.7778	0.0326314	-1.47381	-4.60716	-0.573267	-1.97227	-5.17194
MA0737.1	GLIS3	1663	550	73	1062	384	34	12.3892	12.6991	14.0655	10.7686	12.7745	12.5926	0.0581475	-1.53814	-4.4516	-0.588857	-2.05646	-5.55396
MA1587.1	ZNF135	5333	1463	162	3654	996	83	39.7303	33.7797	31.2139	37.0513	33.1337	30.7407	0.0749815	-1.79104	-4.9659	-0.470489	-2.34575	-5.93071
MA1485.1	FERD3L	2265	839	82	1578	573	45	16.874	19.372	15.7996	16.0008	19.0619	16.6667	-0.00500355	-1.43777	-4.79275	-0.526417	-1.98791	-5.65845
MA0522.3	TCF3	3527	1382	135	2586	916	80	26.2758	31.9095	26.0116	26.2219	30.4724	29.6296	-0.0455827	-1.39727	-4.75299	-0.493302	-1.9906	-5.50788
MA0781.1	PAX9	1076	318	27	643	222	10	8.01609	7.34242	5.20231	6.51998	7.38523	3.7037	0.127894	-1.63069	-5.18868	-0.614894	-2.14915	-6.62164
MA0822.1	HES7	1015	336	34	613	239	18	7.56165	7.75802	6.55106	6.21578	7.95077	6.66667	0.090582	-1.50436	-4.80922	-0.636939	-1.99582	-5.72676
MA0767.1	GCM2	1163	394	43	737	266	26	8.66423	9.09721	8.28516	7.47313	8.84897	9.62963	0.0608522	-1.50073	-4.69652	-0.597262	-2.0675	-5.42234
MA1545.1	OVOL2	758	140	17	381	108	7	5.64702	3.23251	3.27553	3.86331	3.59281	2.59259	0.293863	-2.14291	-5.18473	-0.698544	-2.5173	-6.46484
MA0469.3	E2F3	629	120	19	303	80	12	4.68599	2.77072	3.66089	3.0724	2.66134	4.44444	0.299832	-2.09019	-4.74916	-0.75391	-2.67516	-5.41212
MA0067.1	Pax2	1100	266	36	664	183	12	8.19489	6.14177	6.93642	6.73291	6.08782	4.44444	0.158322	-1.88968	-4.77504	-0.569926	-2.42927	-6.36
MA0762.1	ETV2	3518	520	100	2163	376	30	26.2087	12.0065	19.2678	21.9327	12.5083	11.1111	0.226833	-2.53134	-4.90985	-0.474888	-2.99912	-6.64682
MA1140.2	JUNB(var.2)	1575	284	41	949	204	18	11.7336	6.55738	7.89981	9.62279	6.78643	6.66667	0.212555	-2.25883	-5.05103	-0.518317	-2.73616	-6.23866
MA0626.1	Npas2	1049	360	34	696	251	24	7.81494	8.31217	6.55106	7.05739	8.34997	8.88889	0.039737	-1.50321	-4.9076	-0.552118	-2.02352	-5.4101
MA0749.1	ZBED1	531	98	9	265	78	2	3.9559	2.26276	1.7341	2.68708	2.59481	0.740741	0.301645	-2.13621	-5.581	-0.701075	-2.46552	-7.75092
MA0839.1	CREB3L1	1435	324	44	897	230	23	10.6906	7.48095	8.47784	9.09552	7.65136	8.51852	0.15575	-1.99123	-4.87165	-0.522121	-2.48559	-5.80752
MA0862.1	GMEB2	584	82	9	314	58	3	4.35074	1.89333	1.7341	3.18394	1.92947	1.11111	0.307657	-2.52462	-5.71224	-0.587547	-3.02419	-7.29721
MA1648.1	TCF12(var.2)	3587	1366	136	2698	901	77	26.7228	31.5401	26.2042	27.3575	29.9734	28.5185	-0.0506311	-1.44345	-4.77173	-0.461518	-2.04381	-5.59241
MA0615.1	Gmeb1	637	111	14	366	80	6	4.74559	2.56292	2.6975	3.71121	2.66134	2.22222	0.243257	-2.27748	-5.26454	-0.556193	-2.74996	-6.48693
MA0821.1	HES5	969	340	31	691	247	17	7.21895	7.85038	5.97303	7.00669	8.2169	6.2963	3.7149e-05	-1.51092	-4.96612	-0.487774	-1.97195	-5.83285
MA0828.1	SREBF2(var.2)	1713	294	59	1072	221	13	12.7617	6.78827	11.368	10.87	7.35196	4.81481	0.194339	-2.3483	-4.66533	-0.481882	-2.76007	-6.84753
MA0059.1	MAX::MYC	1392	404	59	959	292	19	10.3703	9.3281	11.368	9.72419	9.71391	7.03704	0.0521957	-1.73254	-4.5081	-0.485361	-2.20092	-6.14282
MA0646.1	GCM1	1096	423	51	813	273	34	8.16509	9.7668	9.82659	8.24376	9.08184	12.5926	-0.0528723	-1.42639	-4.47848	-0.483793	-2.05815	-5.06344
MA1635.1	BHLHE22(var.2)	2638	959	99	1986	655	57	19.6528	22.1427	19.0751	20.1379	21.7898	21.1111	-0.0392954	-1.49914	-4.77517	-0.448874	-2.04917	-5.57163
MA0779.1	PAX1	1018	287	35	718	205	8	7.584	6.62665	6.74374	7.28047	6.81969	2.96296	0.0521534	-1.77446	-4.81009	-0.451528	-2.25989	-6.93937
MA1631.1	ASCL1(var.2)	3814	1532	157	2963	1028	89	28.4139	35.3729	30.2505	30.0446	34.1983	32.963	-0.0827168	-1.39861	-4.68519	-0.446963	-1.97418	-5.50407
MA0101.1	REL	2726	794	106	1954	575	49	20.3084	18.3329	20.4239	19.8134	19.1284	18.1481	0.0341793	-1.7454	-4.65047	-0.446176	-2.21097	-5.76368
MA1493.1	HES6	1223	374	52	900	254	18	9.11123	8.63542	10.0193	9.12594	8.44977	6.66667	0.00815185	-1.70116	-4.54762	-0.434276	-2.25937	-6.07813
MA1637.1	EBF3	3033	1072	162	2289	700	68	22.5955	24.7518	31.2139	23.2103	23.2868	25.1852	-0.0444115	-1.54485	-4.27109	-0.45044	-2.15973	-5.52348
MA0877.2	BARHL1	962	200	33	710	130	16	7.1668	4.61787	6.35838	7.19935	4.32468	5.92593	0.0819766	-2.18406	-4.78352	-0.356241	-2.80555	-5.82792
MA1602.1	ZSCAN29	975	314	50	770	210	25	7.26365	7.25006	9.63391	7.80775	6.98603	9.25926	-0.0454262	-1.68006	-4.33083	-0.38597	-2.26044	-5.33083
MA1656.1	ZNF449	3271	1092	166	2458	755	72	24.3686	25.2136	31.9846	24.924	25.1164	26.6667	-0.0272826	-1.61004	-4.32776	-0.439529	-2.14247	-5.53287
MA1557.1	SMAD5	611	160	25	513	117	7	4.55189	3.6943	4.81696	5.20178	3.89222	2.59259	-0.031562	-1.96466	-4.64273	-0.283776	-2.41623	-6.47924
MA0692.1	TFEB	1551	346	71	1141	253	17	11.5548	7.98892	13.6802	11.5697	8.4165	6.2963	0.0644069	-2.09995	-4.38483	-0.378493	-2.55158	-6.44711
MA0073.1	RREB1	5764	2013	285	4374	1344	134	42.9412	46.4789	54.9133	44.3521	44.7106	49.6296	-0.0417215	-1.55944	-4.37976	-0.439839	-2.14226	-5.46849
MA0776.1	MYBL1	772	139	23	638	100	9	5.75132	3.20942	4.4316	6.46928	3.32668	3.33333	0.0417304	-2.43179	-5.02716	-0.233314	-2.90687	-6.3808
MA1554.1	RFX7	1560	358	44	1213	244	23	11.6218	8.26599	8.47784	12.2997	8.1171	8.51852	0.0424483	-2.08107	-5.10545	-0.320518	-2.63414	-6.04132
MA0777.1	MYBL2	706	203	22	651	153	16	5.25963	4.68714	4.23892	6.6011	5.08982	5.92593	-0.0963507	-1.89454	-5.10044	-0.213361	-2.30249	-5.55988
MA0830.2	TCF4	3293	1312	142	2699	845	70	24.5325	30.2932	27.3603	27.3677	28.1104	25.9259	-0.109404	-1.43704	-4.64484	-0.396382	-2.07178	-5.66531
MA1575.1	THRB(var.2)	1369	430	65	1138	281	35	10.1989	9.92842	12.5241	11.5392	9.34797	12.963	-0.0651427	-1.73586	-4.46168	-0.331765	-2.34962	-5.35477
MA1539.1	NR2F6(var.3)	1431	384	57	1166	265	23	10.6608	8.86631	10.9827	11.8232	8.8157	8.51852	-0.0184394	-1.91628	-4.66836	-0.313895	-2.4514	-5.97769
MA1523.1	MSANTD3	2861	879	111	2239	606	52	21.3142	20.2955	21.3873	22.7033	20.1597	19.2593	-0.0222639	-1.72485	-4.71015	-0.375929	-2.26139	-5.80413
MA1100.2	ASCL1	2577	1020	127	2145	694	57	19.1984	23.5511	24.4701	21.7502	23.0872	21.1111	-0.119763	-1.45689	-4.46256	-0.384478	-2.01245	-5.61835
MA1604.1	Ebf2	3078	1055	164	2429	678	75	22.9308	24.3593	31.5992	24.6299	22.5549	27.7778	-0.0600967	-1.60485	-4.29032	-0.401727	-2.24273	-5.41906
MA1528.1	NFIX(var.2)	1530	588	69	1347	394	42	11.3983	13.5765	13.2948	13.6585	13.1071	15.5556	-0.140112	-1.51976	-4.6109	-0.323893	-2.09738	-5.32711
MA0834.1	ATF7	1564	267	47	1207	191	21	11.6516	6.16486	9.05588	12.2389	6.35396	7.77778	0.0876288	-2.4627	-4.96881	-0.286186	-2.94597	-6.13108
MA0795.1	SMAD3	743	198	36	704	141	10	5.53528	4.57169	6.93642	7.13851	4.69062	3.7037	-0.110227	-2.01809	-4.47752	-0.188014	-2.50789	-6.32552
MA1581.1	ZBTB6	3578	1232	158	2852	822	103	26.6557	28.4461	30.4432	28.9191	27.3453	38.1481	-0.0603564	-1.59851	-4.56151	-0.387536	-2.1823	-5.17879
MA0794.1	PROX1	1392	341	57	1168	216	33	10.3703	7.87347	10.9827	11.8434	7.18563	12.2222	-0.019804	-2.04912	-4.62986	-0.272923	-2.70786	-5.41835
MA1533.1	NR1I2	1687	501	69	1425	328	35	12.568	11.5678	13.2948	14.4494	10.9115	12.963	-0.0583708	-1.80995	-4.67009	-0.301869	-2.42106	-5.64933
MA0510.2	RFX5	1796	405	57	1456	277	29	13.38	9.35119	10.9827	14.7637	9.2149	10.7407	0.0194724	-2.12932	-4.95821	-0.283305	-2.67736	-5.93312
MA0609.2	CREM	1578	313	48	1284	230	24	11.7559	7.22697	9.24855	13.0197	7.65136	8.88889	0.0373518	-2.29651	-5.00157	-0.2601	-2.74104	-6.00157
MA0136.2	ELF5	4523	818	145	3208	587	44	33.6959	18.8871	27.9383	32.5289	19.5276	16.2963	0.124919	-2.34219	-4.83824	-0.370687	-2.82093	-6.55871
MA1556.1	RXRG(var.2)	1729	444	76	1435	298	29	12.8809	10.2517	14.6435	14.5508	9.91351	10.7407	-0.0236764	-1.98498	-4.53147	-0.292564	-2.56023	-5.92142
MA1136.1	FOSB::JUNB(var.2)	1447	232	40	1208	166	15	10.78	5.35673	7.70713	12.249	5.52229	5.55556	0.051301	-2.58957	-5.12562	-0.209143	-3.07251	-6.54066
MA1147.1	NR4A2::RXRA	1308	335	52	1183	235	27	9.74447	7.73493	10.0193	11.9955	7.8177	10	-0.0700452	-2.03517	-4.72275	-0.214958	-2.54668	-5.6683
MA1129.1	FOSL1::JUN(var.2)	1379	220	43	1184	161	14	10.2734	5.07966	8.28516	12.0057	5.35595	5.18519	0.0325198	-2.61553	-4.97062	-0.187434	-3.06597	-6.58953
MA1538.1	NR2F1(var.3)	1500	420	68	1347	291	33	11.1748	9.69753	13.1021	13.6585	9.68064	12.2222	-0.0850654	-1.92157	-4.54835	-0.240278	-2.45094	-5.59142
MA0500.2	MYOG	2274	849	96	2027	589	48	16.9411	19.6029	18.4971	20.5536	19.5941	17.7778	-0.138327	-1.55972	-4.70438	-0.304213	-2.08722	-5.70438
MA1573.1	THAP11	3954	860	137	2979	625	55	29.4569	19.8568	26.3969	30.2069	20.7917	20.3704	0.0636508	-2.13725	-4.78741	-0.344834	-2.59773	-6.10409
MA0145.3	TFCP2	1090	266	53	1050	175	14	8.12039	6.14177	10.2119	10.6469	5.82169	5.18519	-0.106085	-2.14091	-4.46828	-0.160024	-2.74499	-6.38884
MA1644.1	NFYC	3209	700	111	2494	470	51	23.9067	16.1625	21.3873	25.289	15.6354	18.8889	0.0462389	-2.15046	-4.80725	-0.317423	-2.72515	-5.92924
MA0819.1	CLOCK	811	269	39	918	183	14	6.04187	6.21104	7.51445	9.30846	6.08782	5.18519	-0.261013	-1.85311	-4.63917	-0.0822211	-2.40887	-6.11722
MA1652.1	ZKSCAN5	6588	1997	309	5046	1380	136	49.0799	46.1094	59.5376	51.1661	45.9082	50.3704	-0.0136593	-1.73567	-4.42782	-0.39836	-2.26883	-5.61182
MA0138.2	REST	3068	1109	175	2610	731	78	22.8563	25.6061	33.7187	26.4652	24.318	28.8889	-0.114545	-1.58258	-4.24642	-0.347793	-2.1839	-5.41223
MA0525.2	TP63	872	173	31	933	124	10	6.49631	3.99446	5.97303	9.46056	4.12508	3.7037	-0.136419	-2.46997	-4.95041	-0.0388698	-2.95041	-6.58267
MA1555.1	RXRB(var.2)	1328	344	53	1281	237	18	9.89347	7.94274	10.2119	12.9893	7.88423	6.66667	-0.110931	-2.05971	-4.75805	-0.162916	-2.59723	-6.31605
MA0600.2	RFX2	1649	355	57	1478	249	24	12.2849	8.19672	10.9827	14.9868	8.28343	8.88889	-0.0340915	-2.24979	-4.88858	-0.192037	-2.76147	-6.1365
MA1117.1	RELB	2394	762	124	2090	497	61	17.8351	17.5941	23.8921	21.1925	16.5336	22.5926	-0.0978401	-1.7494	-4.36885	-0.29376	-2.36595	-5.39231
MA0074.1	RXRA::VDR	1801	479	82	1623	346	24	13.4173	11.0598	15.7996	16.4571	11.5103	8.88889	-0.0781227	-1.98882	-4.53515	-0.228258	-2.45808	-6.30774
MA0597.1	THAP1	2406	788	120	2126	537	55	17.9245	18.1944	23.1214	21.5575	17.8643	20.3704	-0.109311	-1.71968	-4.43484	-0.287806	-2.27295	-5.56037
MA0112.3	ESR1	1680	485	72	1575	338	33	12.5158	11.1983	13.8728	15.9704	11.2442	12.2222	-0.114428	-1.90683	-4.65875	-0.207537	-2.42779	-5.78428
MA0656.1	JDP2(var.2)	1591	305	54	1444	223	22	11.8528	7.04225	10.4046	14.6421	7.4185	8.14815	-0.0253939	-2.40845	-4.90622	-0.165257	-2.86021	-6.20168
MA0816.1	Ascl2	2989	1122	146	2653	762	70	22.2677	25.9063	28.131	26.9012	25.3493	25.9259	-0.141364	-1.55495	-4.49699	-0.313402	-2.11316	-5.55753
MA1542.1	OSR1	1487	378	58	1429	260	28	11.078	8.72778	11.1753	14.49	8.64937	10.3704	-0.104959	-2.08091	-4.78517	-0.162357	-2.62078	-5.83579
MA1552.1	RARB(var.3)	1311	343	54	1310	237	22	9.76682	7.91965	10.4046	13.2833	7.88423	8.14815	-0.135266	-2.06965	-4.73683	-0.136367	-2.60298	-6.03229
MA0154.4	EBF1	3053	1084	174	2659	717	72	22.7445	25.0289	33.526	26.9621	23.8523	26.6667	-0.123272	-1.61714	-4.25634	-0.322616	-2.21345	-5.52936
MA0840.1	Creb5	1640	296	49	1505	217	22	12.2178	6.83445	9.44123	15.2606	7.2189	8.14815	-0.0218724	-2.4919	-5.08664	-0.145805	-2.9398	-6.24192
MA0831.2	TFE3	1721	336	82	1548	246	14	12.8213	7.75802	15.7996	15.6966	8.18363	5.18519	-0.0315415	-2.38826	-4.42302	-0.184383	-2.83806	-6.97322
MA1585.1	ZKSCAN1	1552	360	70	1477	224	28	11.5622	8.31217	13.4875	14.9767	7.45176	10.3704	-0.0885676	-2.19663	-4.5592	-0.160026	-2.88113	-5.88113
MA1628.1	Zic1::Zic2	3995	1461	206	3441	973	103	29.7623	33.7335	39.6917	34.8915	32.3686	38.1481	-0.120488	-1.57173	-4.39797	-0.335855	-2.15817	-5.39797
MA0861.1	TP73	1011	222	41	1151	154	11	7.53185	5.12584	7.89981	11.6711	5.12309	4.07407	-0.194543	-2.38169	-4.81856	-0.0074381	-2.90932	-6.71668
MA1139.1	FOSL2::JUNB(var.2)	1414	257	48	1412	188	16	10.5342	5.93396	9.24855	14.3176	6.25416	5.92593	-0.0791826	-2.53912	-4.95979	-0.0812246	-2.99016	-6.54475
MA0521.1	Tcf12	3677	1404	163	3294	954	95	27.3933	32.4175	31.4066	33.4009	31.7365	35.1852	-0.14771	-1.5367	-4.6433	-0.306399	-2.09418	-5.42217
MA1149.1	RARA::RXRG	2481	697	120	2233	481	51	18.4832	16.0933	23.1214	22.6425	16.0013	18.8889	-0.0889598	-1.92065	-4.45878	-0.240898	-2.45577	-5.69324
MA0511.2	RUNX2	1505	346	65	1515	240	23	11.2121	7.98892	12.5241	15.362	7.98403	8.51852	-0.121207	-2.24213	-4.65439	-0.111653	-2.76986	-6.15319
MA1553.1	RARG(var.3)	1149	311	57	1304	216	23	8.55993	7.18079	10.9827	13.2225	7.18563	8.51852	-0.228169	-2.11356	-4.56144	-0.045604	-2.63944	-5.87077
MA1527.1	NFIC(var.2)	1728	652	86	1835	456	45	12.8734	15.0543	16.5703	18.6068	15.1697	16.6667	-0.24791	-1.65407	-4.57653	-0.161233	-2.16991	-5.51094
MA1420.1	IRF5	2376	576	86	2170	435	38	17.701	13.2995	16.5703	22.0037	14.4711	14.0741	-0.0645358	-2.10893	-4.85259	-0.195376	-2.51398	-6.03093
MA0727.1	NR3C2	1012	281	55	1240	183	20	7.5393	6.48811	10.5973	12.5735	6.08782	7.40741	-0.28697	-2.13554	-4.4886	0.00616132	-2.75426	-5.94803
MA0007.3	Ar	1148	367	67	1362	255	21	8.55248	8.47379	12.9094	13.8106	8.48303	7.77778	-0.290996	-1.93627	-4.38981	-0.0443922	-2.46155	-6.06359
MA0605.2	ATF3	1434	297	48	1511	212	22	10.6832	6.85754	9.24855	15.3214	7.05256	8.14815	-0.130384	-2.40189	-5.03125	-0.0549251	-2.88829	-6.15678
MA0088.2	ZNF143	2685	519	111	2314	353	33	20.003	11.9834	21.3873	23.4638	11.7432	12.2222	-0.000297742	-2.37141	-4.59659	-0.214831	-2.92748	-6.34661
MA1153.1	Smad4	1563	428	84	1638	281	27	11.6442	9.88224	16.185	16.6092	9.34797	10	-0.180609	-2.04924	-4.39839	-0.112991	-2.65628	-6.03582
MA0799.1	RFX4	1993	407	71	1893	283	24	14.8476	9.39737	13.6802	19.1949	9.4145	8.88889	-0.0630506	-2.35489	-4.87403	-0.137318	-2.87912	-6.43881
MA1651.1	ZFP42	3802	579	122	3004	434	28	28.3245	13.3687	23.5067	30.4604	14.4378	10.3704	0.0861809	-2.62894	-4.87562	-0.253693	-3.04481	-6.99901
MA1521.1	MAFA	1313	372	56	1494	256	24	9.78172	8.58924	10.79	15.1491	8.5163	8.88889	-0.23324	-2.05273	-4.78454	-0.0469267	-2.59189	-6.00693
MA1154.1	ZNF282	2847	725	162	2494	476	67	21.2099	16.7398	31.2139	25.289	15.835	24.8148	-0.0616676	-2.03506	-4.19704	-0.252649	-2.64208	-5.47081
MA0730.1	RARA(var.2)	2320	668	126	2189	464	39	17.2838	15.4237	24.2775	22.1963	15.4358	14.4444	-0.125025	-1.92123	-4.32765	-0.208878	-2.44695	-6.01953
MA0111.1	Spz1	2135	603	103	2067	392	33	15.9055	13.9229	19.8459	20.9592	13.0406	12.2222	-0.13324	-1.95725	-4.50676	-0.179938	-2.57855	-6.14887
MA0620.3	MITF	1250	194	61	1354	133	10	9.31237	4.47934	11.7534	13.7295	4.42448	3.7037	-0.125924	-2.81372	-4.4829	-0.0106241	-3.35835	-7.09171
MA1601.1	ZNF75D	3640	1026	179	3122	709	67	27.1176	23.6897	34.4894	31.6569	23.5862	24.8148	-0.0624393	-1.88935	-4.40835	-0.283907	-2.42252	-5.82607
MA1116.1	RBPJ	4487	1215	192	3715	835	90	33.4277	28.0536	36.9942	37.6698	27.7778	33.3333	-0.0309763	-1.91577	-4.57755	-0.303365	-2.45688	-5.67066
MA1537.1	NR2F1(var.2)	2932	715	119	2592	490	54	21.8431	16.5089	22.9287	26.2827	16.3007	20	-0.0490291	-2.0849	-4.67188	-0.226848	-2.63006	-5.81181
MA1600.1	ZNF684	2960	898	140	2698	591	64	22.0517	20.7342	26.975	27.3575	19.6607	23.7037	-0.110044	-1.83085	-4.51214	-0.24375	-2.43441	-5.64142
MA1649.1	ZBTB12	2451	680	120	2293	459	41	18.2597	15.7008	23.1214	23.2509	15.2695	15.1852	-0.109898	-1.95966	-4.46216	-0.206032	-2.5267	-6.0115
MA1574.1	THRB	2901	763	123	2605	516	59	21.6122	17.6172	23.6994	26.4145	17.1657	21.8519	-0.0720583	-1.99885	-4.63188	-0.227325	-2.56317	-5.69175
MA1558.1	SNAI1	2910	1103	135	2801	704	70	21.6792	25.4676	26.0116	28.4019	23.4198	25.9259	-0.188127	-1.58771	-4.61812	-0.243205	-2.2355	-5.56565
MA1127.1	FOSB::JUN	1823	327	63	1786	227	26	13.5812	7.55022	12.1387	18.1099	7.55156	9.62963	-0.0656659	-2.54462	-4.92048	-0.0952484	-3.07122	-6.19733
MA0838.1	CEBPG	911	219	34	1228	149	12	6.78686	5.05657	6.55106	12.4518	4.95675	4.44444	-0.325036	-2.38156	-5.06888	0.105752	-2.93717	-6.57138
MA1146.1	NR1H4::RXRA	1439	334	64	1574	240	23	10.7204	7.71184	12.3314	15.9603	7.98403	8.51852	-0.177469	-2.28462	-4.66832	-0.0481004	-2.76143	-6.14476
MA0711.1	OTX1	1310	311	63	1487	225	24	9.75937	7.18079	12.1387	15.0781	7.48503	8.88889	-0.207712	-2.28229	-4.58578	-0.0248744	-2.74928	-5.9781
MA1131.1	FOSL2::JUN(var.2)	1950	361	72	1883	265	26	14.5273	8.33526	13.8728	19.0935	8.8157	9.62963	-0.061751	-2.49515	-4.82108	-0.112192	-2.94116	-6.29057
MA1546.1	PAX3(var.2)	1093	216	49	1321	142	14	8.14274	4.9873	9.44123	13.3948	4.72389	5.18519	-0.225742	-2.56493	-4.70511	0.0475947	-3.17007	-6.51247
MA0764.2	ETV4	6663	2076	295	5423	1469	121	49.6387	47.9335	56.8401	54.9888	48.8689	44.8148	-0.0498656	-1.73223	-4.54725	-0.346946	-2.2312	-5.83296
MA1641.1	MYF5	1717	573	79	1873	386	39	12.7915	13.2302	15.2216	18.9921	12.841	14.4444	-0.237196	-1.82048	-4.67909	-0.111735	-2.39041	-5.69747
MA0858.1	Rarb(var.2)	1992	559	103	2013	373	40	14.8402	12.9069	19.8459	20.4117	12.4085	14.8148	-0.160619	-1.99392	-4.43412	-0.145489	-2.57759	-5.79869
MA0056.2	MZF1	2651	774	139	2496	536	58	19.7497	17.8712	26.7823	25.3093	17.831	21.4815	-0.125122	-1.90125	-4.3785	-0.212041	-2.43135	-5.63946
MA1143.1	FOSL1::JUND(var.2)	1799	275	69	1782	200	20	13.4024	6.34957	13.2948	18.0694	6.65336	7.40741	-0.0578386	-2.76753	-4.76229	-0.0715365	-3.22696	-6.54889
MA0113.3	NR3C1	1016	286	54	1355	191	15	7.5691	6.60356	10.4046	13.7396	6.35396	5.55556	-0.348266	-2.17708	-4.58206	0.0671266	-2.75952	-6.43006
MA0164.1	Nr2e3	1231	284	73	1461	188	20	9.17083	6.55738	14.0655	14.8144	6.25416	7.40741	-0.240847	-2.35671	-4.31664	0.00627885	-2.95187	-6.18453
MA0119.1	NFIC::TLX1	1570	545	93	1805	391	31	11.6963	12.5837	17.9191	18.3026	13.0073	11.4815	-0.286258	-1.81269	-4.36365	-0.0850235	-2.29178	-5.94861
MA0591.1	Bach1::Mafk	2051	581	101	2102	406	36	15.2797	13.4149	19.4605	21.3141	13.5063	13.3333	-0.16953	-1.98925	-4.51343	-0.134094	-2.50631	-6.00172
MA1470.1	BACH2(var.2)	1383	306	61	1591	206	22	10.3032	7.06534	11.7534	16.1326	6.85296	8.14815	-0.20482	-2.38102	-4.70767	-0.00268733	-2.9519	-6.17897
MA1133.1	JUN::JUNB(var.2)	1785	345	62	1864	249	26	13.2981	7.96583	11.9461	18.9008	8.28343	9.62963	-0.116475	-2.48773	-4.96399	-0.053997	-2.95818	-6.21774
MA0668.1	NEUROD2	508	132	36	1023	86	8	3.78455	3.04779	6.93642	10.3731	2.86094	2.96296	-0.674127	-2.61842	-4.49289	0.335779	-3.23655	-6.66281
MA0095.2	YY1	4442	722	133	3572	513	55	33.0925	16.6705	25.6262	36.2198	17.0659	20.3704	0.0700968	-2.55104	-4.99161	-0.244381	-3.04408	-6.26554
MA0106.3	TP53	806	190	41	1228	138	10	6.00462	4.38698	7.89981	12.4518	4.59082	3.7037	-0.423	-2.50778	-4.72008	0.184458	-2.96911	-6.75571
MA0738.1	HIC2	1678	613	87	1943	419	46	12.5009	14.1538	16.763	19.7019	13.9388	17.037	-0.296964	-1.74975	-4.56655	-0.0854205	-2.29868	-5.48593
MA1531.1	NR1D1	2135	574	107	2169	371	42	15.9055	13.2533	20.6166	21.9935	12.342	15.5556	-0.155699	-2.05081	-4.47425	-0.132905	-2.68044	-5.8234
MA0774.1	MEIS2	2048	630	108	2152	442	31	15.2574	14.5463	20.8092	21.8211	14.7039	11.4815	-0.202052	-1.90284	-4.44716	-0.13059	-2.41415	-6.24786
MA0798.2	RFX3	2460	566	100	2367	393	41	18.3268	13.0686	19.2678	24.0012	13.0739	15.1852	-0.0912772	-2.21106	-4.71186	-0.146876	-2.73733	-5.99817
MA1619.1	Ptf1a(var.2)	1731	594	82	1977	405	36	12.8958	13.7151	15.7996	20.0466	13.4731	13.3333	-0.272983	-1.81605	-4.67282	-0.0812761	-2.3686	-5.86045
MA1655.1	ZNF341	2741	760	114	2637	530	55	20.4202	17.5479	21.9653	26.739	17.6314	20.3704	-0.121957	-1.97259	-4.70955	-0.177761	-2.49259	-5.76108
MA0860.1	Rarg(var.2)	2353	574	110	2310	386	41	17.5296	13.2533	21.1946	23.4232	12.841	15.1852	-0.11657	-2.15195	-4.5355	-0.143178	-2.7244	-5.9593
MA0594.2	HOXA9	993	199	65	1341	139	13	7.39775	4.59478	12.5241	13.5976	4.62409	4.81481	-0.319877	-2.6389	-4.25316	0.113567	-3.15659	-6.57509
MA0818.1	BHLHE22	519	127	31	1058	85	9	3.8665	2.93235	5.97303	10.728	2.82768	3.33333	-0.67347	-2.70438	-4.73886	0.354063	-3.28367	-6.52314
MA0009.2	TBXT	793	217	48	1266	144	18	5.90777	5.01039	9.24855	12.8372	4.79042	6.66667	-0.483558	-2.35318	-4.52977	0.191326	-2.94481	-5.94481
MA0611.1	Dux	2132	447	75	2181	298	31	15.8832	10.3209	14.4509	22.1152	9.91351	11.4815	-0.11365	-2.36751	-4.94282	-0.0808673	-2.95247	-6.21745
MA1145.1	FOSL2::JUND(var.2)	1859	358	73	1972	262	22	13.8494	8.26599	14.0655	19.9959	8.7159	8.14815	-0.129345	-2.50584	-4.79983	-0.0442122	-2.95623	-6.53022
MA1572.1	TGIF2LY	895	271	47	1387	176	18	6.66766	6.25722	9.05588	14.0641	5.85496	6.66667	-0.470893	-2.19449	-4.72205	0.161115	-2.81721	-6.10671
MA0595.1	SREBF1	2195	514	97	2241	338	30	16.3525	11.8679	18.6898	22.7236	11.2442	11.1111	-0.133546	-2.22793	-4.63364	-0.103625	-2.83267	-6.32666
MA1568.1	TCF21(var.2)	580	163	37	1157	104	13	4.32094	3.76356	7.12909	11.7319	3.45975	4.81481	-0.67204	-2.50322	-4.6425	0.324224	-3.15151	-6.15151
MA0623.2	NEUROG1	411	125	32	1044	84	10	3.06191	2.88617	6.1657	10.5861	2.79441	3.7037	-0.903983	-2.62119	-4.58698	0.440929	-3.19466	-6.26505
MA0739.1	Hic1	1415	515	83	1812	343	35	10.5416	11.891	15.9923	18.3736	11.4105	12.963	-0.366999	-1.82516	-4.45855	-0.010218	-2.41152	-5.7043
MA0466.2	CEBPB	1116	262	46	1562	187	13	8.31409	6.04941	8.8632	15.8386	6.22089	4.81481	-0.352218	-2.44292	-4.95278	0.132839	-2.92945	-6.7759
MA0855.1	RXRB	2921	740	138	2815	493	64	21.7612	17.0861	26.5896	28.5439	16.4005	23.7037	-0.111402	-2.09227	-4.51512	-0.164729	-2.6782	-5.62365
MA0159.1	RARA::RXRA	2453	756	135	2559	522	55	18.2746	17.4556	26.0116	25.9481	17.3653	20.3704	-0.199242	-1.89733	-4.38276	-0.138209	-2.43167	-5.67821
MA0803.1	TBX15	1719	532	93	2046	359	30	12.8064	12.2835	17.9191	20.7463	11.9428	11.1111	-0.284993	-1.97706	-4.49319	-0.033756	-2.54451	-6.12546
MA1559.1	SNAI3	2886	1131	131	3041	739	71	21.5004	26.1141	25.2408	30.8355	24.5842	26.2963	-0.249061	-1.60053	-4.71049	-0.173586	-2.21449	-5.59417
MA0647.1	GRHL1	1252	300	66	1670	192	24	9.32727	6.92681	12.7168	16.9337	6.38723	8.88889	-0.325317	-2.38652	-4.57094	0.0902966	-3.03037	-6.03037
MA1654.1	ZNF16	3466	1165	175	3363	784	78	25.8214	26.8991	33.7187	34.1006	26.0812	28.8889	-0.169229	-1.74217	-4.47707	-0.212752	-2.31358	-5.64288
MA0158.2	HOXA5	894	243	51	1446	149	22	6.66021	5.61071	9.82659	14.6623	4.95675	8.14815	-0.49125	-2.37057	-4.62296	0.202471	-3.07621	-5.83595
MA0258.2	ESR2	2137	664	128	2354	448	45	15.9204	15.3313	24.6628	23.8694	14.9035	16.6667	-0.238112	-1.92444	-4.29948	-0.0985843	-2.49213	-5.80763
MA1540.1	NR5A1	2293	636	135	2423	430	48	17.0826	14.6848	26.0116	24.5691	14.3047	17.7778	-0.191122	-2.04126	-4.27733	-0.111564	-2.60595	-5.76918
MA1643.1	NFIB	1967	673	113	2284	469	45	14.654	15.5391	21.7726	23.1596	15.6021	16.6667	-0.288909	-1.83623	-4.41051	-0.0733433	-2.35725	-5.73884
MA1629.1	Zic2	3471	1253	189	3429	850	82	25.8586	28.931	36.4162	34.7698	28.2768	30.3704	-0.197383	-1.66735	-4.39628	-0.214947	-2.2272	-5.60097
MA1472.1	BHLHA15(var.2)	1818	607	93	2181	408	39	13.5439	14.0152	17.9191	22.1152	13.5729	14.4444	-0.302343	-1.88493	-4.59132	-0.0397052	-2.45805	-5.84508
MA1494.1	HNF4A(var.2)	2402	630	129	2503	422	47	17.8947	14.5463	24.8555	25.3802	14.0386	17.4074	-0.169926	-2.10074	-4.38872	-0.110504	-2.67885	-5.84536
MA1535.1	NR2C1	2089	517	101	2296	339	38	15.5628	11.9372	19.4605	23.2813	11.2774	14.0741	-0.192322	-2.2069	-4.56271	-0.056012	-2.81578	-5.97299
MA0512.2	Rxra	2760	706	126	2778	461	60	20.5617	16.3011	24.2775	28.1687	15.336	22.2222	-0.138966	-2.10589	-4.59214	-0.129588	-2.7208	-5.66253
MA0837.1	CEBPE	1137	276	53	1654	199	13	8.47054	6.37266	10.2119	16.7714	6.62009	4.81481	-0.388655	-2.43115	-4.81175	0.152072	-2.90305	-6.83923
MA1536.1	NR2C2(var.2)	1861	439	87	2147	280	30	13.8643	10.1362	16.763	21.7704	9.3147	11.1111	-0.217048	-2.30083	-4.63597	-0.0108034	-2.94963	-6.17202
MA1571.1	TGIF2LX	957	277	50	1567	181	18	7.12955	6.39575	9.63391	15.8893	6.02129	6.66667	-0.507218	-2.29585	-4.76574	0.204196	-2.90975	-6.23967
MA0775.1	MEIS3	1553	456	99	1976	319	27	11.5697	10.5287	19.0751	20.0365	10.6121	10	-0.327266	-2.09522	-4.29875	0.0202589	-2.6107	-6.17322
MA1419.1	IRF4	2825	658	103	2836	494	28	21.046	15.1928	19.8459	28.7568	16.4338	10.3704	-0.117113	-2.2192	-4.89465	-0.111506	-2.63278	-6.77379
MA0829.2	SREBF1(var.2)	1935	362	83	2171	248	20	14.4156	8.35835	15.9923	22.0138	8.25017	7.40741	-0.166191	-2.58446	-4.70927	-0.000165043	-3.13011	-6.76238
MA0856.1	RXRG	2871	695	135	2863	463	61	21.3887	16.0471	26.0116	29.0306	15.4025	22.5926	-0.125363	-2.17183	-4.53589	-0.129389	-2.75783	-5.68196
MA1576.1	THRB(var.3)	2462	694	117	2651	484	49	18.3417	16.024	22.5434	26.881	16.1011	18.1481	-0.199082	-2.02591	-4.59433	-0.0923762	-2.54583	-5.84999
MA0639.1	DBP	974	185	38	1573	115	14	7.2562	4.27153	7.32177	15.9501	3.82568	5.18519	-0.440233	-2.83663	-5.12008	0.251292	-3.52252	-6.56066
MA0673.1	NKX2-8	1788	468	91	2162	315	36	13.3204	10.8058	17.5337	21.9225	10.479	13.3333	-0.266802	-2.20057	-4.56314	0.00721783	-2.77172	-5.90101
MA0806.1	TBX4	1694	446	91	2099	306	26	12.6201	10.2979	17.5337	21.2837	10.1796	9.62963	-0.286274	-2.21159	-4.5047	0.022994	-2.7551	-6.31205
MA0832.1	Tcf21	1851	567	89	2265	379	37	13.7898	13.0917	17.1484	22.9669	12.6081	13.7037	-0.29863	-2.00551	-4.67699	-0.00742417	-2.58667	-5.94327
MA1520.1	MAF	1270	337	74	1808	230	23	9.46137	7.78111	14.2582	18.333	7.65136	8.51852	-0.390326	-2.30433	-4.49149	0.11924	-2.85545	-6.17738
MA0642.1	EN2	1239	322	69	1787	201	32	9.23043	7.43477	13.2948	18.1201	6.68663	11.8519	-0.395895	-2.33994	-4.56233	0.132468	-3.0198	-5.67086
MA0691.1	TFAP4	1548	496	83	2057	330	34	11.5324	11.4523	15.9923	20.8578	10.978	12.5926	-0.366819	-2.00881	-4.58797	0.0433178	-2.59669	-5.87555
MA0526.3	USF2	1732	380	105	2077	273	19	12.9032	8.77396	20.2312	21.0606	9.08184	7.03704	-0.242224	-2.43059	-4.2862	0.0198378	-2.90769	-6.75252
MA0509.2	RFX1	2470	548	105	2607	370	39	18.4013	12.653	20.2312	26.4348	12.3087	14.4444	-0.146365	-2.31863	-4.70242	-0.0684857	-2.88528	-6.13126
MA0503.1	Nkx2-5(var.2)	2290	631	134	2522	425	31	17.0603	14.5694	25.8189	25.5729	14.1384	11.4815	-0.216483	-2.07612	-4.31153	-0.0772622	-2.6463	-6.42342
MA1561.1	SOX12	1759	369	65	2129	255	25	13.1044	8.51997	12.5241	21.5879	8.48303	9.25926	-0.229285	-2.48235	-4.98746	0.0461357	-3.01547	-6.36597
MA0124.2	Nkx3-1	1913	434	79	2244	308	35	14.2517	10.0208	15.2216	22.754	10.2462	12.963	-0.219927	-2.36	-4.81777	0.0103089	-2.85476	-5.99226
MA0672.1	NKX2-3	1835	481	93	2215	309	46	13.6706	11.106	17.9191	22.4599	10.2794	17.037	-0.265703	-2.19737	-4.56811	0.00582412	-2.8358	-5.5837
MA0648.1	GSC	1713	413	83	2118	280	32	12.7617	9.5359	15.9923	21.4764	9.3147	11.8519	-0.269183	-2.32149	-4.63645	0.0369943	-2.88221	-6.01149
MA0826.1	OLIG1	651	149	38	1390	102	13	4.84988	3.44031	7.32177	14.0945	3.39321	4.81481	-0.707361	-2.83471	-4.80595	0.386994	-3.38145	-6.35343
MA0017.2	NR2F1	2973	653	116	2969	432	40	22.1486	15.0773	22.3507	30.1055	14.3713	14.8148	-0.106949	-2.29371	-4.78667	-0.108892	-2.88977	-6.32273
MA1467.1	ATOH1(var.2)	2265	811	129	2637	554	56	16.874	18.7255	24.8555	26.739	18.4298	20.7407	-0.299292	-1.78103	-4.43336	-0.079906	-2.33085	-5.63723
MA0065.2	Pparg::Rxra	4466	1312	235	4132	888	102	33.2713	30.2932	45.2794	41.8982	29.5409	37.7778	-0.116055	-1.88327	-4.36431	-0.228198	-2.44641	-5.5684
MA0473.3	ELF1	5794	1422	226	4985	1001	88	43.1647	32.8331	43.5453	50.5476	33.3001	32.5926	-0.0331877	-2.05983	-4.71335	-0.250154	-2.56631	-6.0741
MA0652.1	IRF8	3010	748	118	3072	563	34	22.4242	17.2708	22.736	31.1499	18.7292	12.5926	-0.139175	-2.14783	-4.81208	-0.109761	-2.55773	-6.60726
MA1550.1	PPARD	3029	791	144	3083	530	69	22.5657	18.2637	27.7457	31.2614	17.6314	25.5556	-0.150509	-2.0876	-4.54521	-0.125016	-2.66529	-5.60661
MA0643.1	Esrrg	2096	545	108	2430	373	32	15.615	12.5837	20.8092	24.64	12.4085	11.8519	-0.237376	-2.18069	-4.51591	-0.0240584	-2.72777	-6.2708
MA0100.3	MYB	1809	428	84	2224	285	32	13.4769	9.88224	16.185	22.5512	9.48104	11.8519	-0.261429	-2.34094	-4.69009	0.0365353	-2.92759	-6.08241
MA0873.1	HOXD12	1386	299	81	1906	214	18	10.3256	6.90372	15.6069	19.3267	7.1191	6.66667	-0.33798	-2.55069	-4.43484	0.121641	-3.03322	-6.60477
MA0745.2	SNAI2	2756	1020	135	3086	655	66	20.5319	23.5511	26.0116	31.2918	21.7898	24.4444	-0.276502	-1.71051	-4.62805	-0.11334	-2.34951	-5.66047
MA0160.1	NR4A2	2319	644	122	2626	435	47	17.2763	14.8695	23.5067	26.6275	14.4711	17.4074	-0.232582	-2.08095	-4.48113	-0.0532177	-2.647	-5.85728
MA0083.3	SRF	1158	319	73	1810	222	22	8.62698	7.3655	14.0655	18.3533	7.38523	8.14815	-0.469167	-2.32917	-4.45676	0.175187	-2.85217	-6.18716
MA0093.3	USF1	1709	388	112	2136	272	22	12.7319	8.95867	21.58	21.6589	9.04857	8.14815	-0.278545	-2.41757	-4.21013	0.0432143	-2.93002	-6.55805
MA0677.1	Nr2f6	2782	667	131	2914	449	52	20.7256	15.4006	25.2408	29.5478	14.9368	19.2593	-0.155326	-2.21569	-4.56381	-0.0884477	-2.78666	-5.89679
MA1498.1	HOXA7	1299	297	48	1919	204	30	9.67742	6.85754	9.24855	19.4585	6.78643	11.1111	-0.388032	-2.5169	-5.14626	0.174921	-3.05879	-5.82433
MA0914.1	ISL2	1736	434	78	2226	308	29	12.933	10.0208	15.0289	22.5715	10.2462	10.7407	-0.298139	-2.29814	-4.77429	0.0605472	-2.7929	-6.20171
MA0817.1	BHLHE23	673	143	33	1481	95	9	5.01378	3.30178	6.35838	15.0172	3.16035	3.33333	-0.723993	-2.95858	-5.07406	0.413901	-3.5486	-6.94853
MA1589.1	ZNF140	2986	787	125	3120	532	60	22.2454	18.1713	24.0848	31.6366	17.6979	22.2222	-0.165187	-2.08897	-4.7434	-0.101855	-2.6539	-5.80229
MA1597.1	ZNF528	3234	944	164	3318	660	59	24.093	21.7964	31.5992	33.6443	21.9561	21.8519	-0.176366	-1.95283	-4.47792	-0.139372	-2.46915	-5.95283
MA0714.1	PITX3	1767	433	87	2243	297	34	13.164	9.99769	16.763	22.7439	9.88024	12.5926	-0.29055	-2.31941	-4.63469	0.0535774	-2.86332	-5.99017
MA0682.2	PITX1	1700	415	86	2197	287	32	12.6648	9.58208	16.5703	22.2774	9.54757	11.8519	-0.303654	-2.33801	-4.60871	0.0663461	-2.87007	-6.03497
MA0771.1	HSF4	2197	586	115	2559	404	36	16.3674	13.5304	22.158	25.9481	13.4398	13.3333	-0.244914	-2.15148	-4.50074	-0.0248691	-2.68802	-6.17631
MA0904.2	HOXB5	962	238	63	1689	139	24	7.1668	5.49527	12.1387	17.1263	4.62409	8.88889	-0.549925	-2.565	-4.48254	0.262135	-3.34088	-5.87486
MA0902.2	HOXB2	1182	309	67	1874	188	27	8.80578	7.13461	12.9094	19.0022	6.25416	10	-0.470161	-2.40571	-4.61109	0.19473	-3.12259	-5.92229
MA1566.1	TBX3	1957	528	105	2419	352	31	14.5795	12.1912	20.2312	24.5285	11.7099	11.4815	-0.28822	-2.17825	-4.5084	0.017547	-2.76322	-6.26845
MA1518.1	LHX1	1234	297	60	1912	194	33	9.19318	6.85754	11.5607	19.3875	6.45376	12.2222	-0.43759	-2.4924	-4.79983	0.19415	-3.1068	-5.66232
MA0068.2	PAX4	1130	278	79	1824	176	24	8.41839	6.41884	15.2216	18.4952	5.85496	8.88889	-0.483285	-2.50645	-4.32161	0.207498	-3.16596	-6.04043
MA0859.1	Rarg	2648	622	128	2866	431	35	19.7273	14.3616	24.6628	29.061	14.338	12.963	-0.174522	-2.26444	-4.54521	-0.0603868	-2.79367	-6.41593
MA0820.1	FIGLA	2115	660	118	2587	445	41	15.7565	15.239	22.736	26.232	14.8037	15.1852	-0.305859	-1.98598	-4.46966	-0.015237	-2.55464	-5.99475
MA0499.2	MYOD1	2842	1014	136	3204	652	64	21.1726	23.4126	26.2042	32.4883	21.69	23.7037	-0.27263	-1.75948	-4.65786	-0.0996622	-2.39659	-5.74532
MA0665.1	MSC	2481	738	118	2852	497	48	18.4832	17.0399	22.736	28.9191	16.5336	17.7778	-0.251126	-2.00035	-4.64519	-0.0500735	-2.57073	-5.94287
MA0596.1	SREBF2	1866	517	114	2385	324	45	13.9015	11.9372	21.9653	24.1837	10.7784	16.6667	-0.319864	-2.17158	-4.35271	0.0341758	-2.84575	-5.69374
MA1468.1	ATOH7	821	221	56	1662	141	20	6.11637	5.10275	10.79	16.8526	4.69062	7.40741	-0.681555	-2.57489	-4.55544	0.335911	-3.22324	-6.04087
MA1502.1	HOXB8	1418	319	58	2070	221	31	10.564	7.3655	11.1753	20.9897	7.35196	11.4815	-0.378952	-2.53118	-4.99061	0.166821	-3.06069	-5.8944
MA0910.2	HOXD8	1475	315	60	2104	210	35	10.9886	7.27315	11.5607	21.3344	6.98603	12.963	-0.354939	-2.58223	-4.97455	0.157481	-3.16719	-5.75216
MA0069.1	PAX6	1685	414	74	2276	279	31	12.5531	9.55899	14.2582	23.0785	9.28144	11.4815	-0.333074	-2.35812	-4.84215	0.100678	-2.92749	-6.09741
MA0066.1	PPARG	1932	556	114	2469	378	27	14.3932	12.8377	21.9653	25.0355	12.5749	10	-0.324516	-2.12145	-4.40751	0.0293154	-2.67815	-6.48551
MA0667.1	MYF6	1594	424	77	2232	285	26	11.8751	9.78989	14.8362	22.6323	9.48104	9.62963	-0.373057	-2.28357	-4.74471	0.112629	-2.85667	-6.31105
MA0513.1	SMAD2::SMAD3::SMAD4	2941	941	163	3253	611	65	21.9102	21.7271	31.4066	32.9852	20.326	24.0741	-0.243536	-1.88758	-4.4169	-0.0980715	-2.5106	-5.74326
MA0805.1	TBX1	1777	531	101	2395	357	32	13.2385	12.2604	19.4605	24.2851	11.8762	11.8519	-0.367134	-2.10979	-4.50415	0.0634483	-2.68258	-6.16236
MA1565.1	TBX18	3250	920	170	3417	621	77	24.2122	21.2422	32.7553	34.6481	20.6587	28.5185	-0.1874	-2.00813	-4.44423	-0.11511	-2.57517	-5.58684
MA1503.1	HOXB9	1336	278	81	2019	194	17	9.95307	6.41884	15.6069	20.4725	6.45376	6.2963	-0.407395	-2.67216	-4.45125	0.188326	-3.19119	-6.70364
MA0804.1	TBX19	1093	230	65	1868	162	19	8.14274	5.31055	12.5241	18.9414	5.38922	7.03704	-0.507148	-2.75574	-4.57886	0.266053	-3.26138	-6.3533
MA1155.1	ZSCAN4	2420	938	154	2978	646	61	18.0288	21.6578	29.6724	30.1967	21.4904	22.5926	-0.355553	-1.7229	-4.32956	-0.0562159	-2.26095	-5.66561
MA0705.1	Lhx8	1201	308	80	1971	191	22	8.94733	7.11152	15.4143	19.9858	6.35396	8.14815	-0.499982	-2.46322	-4.40807	0.214709	-3.15257	-6.27057
MA1132.1	JUN::JUNB	1420	302	60	2120	219	19	10.5789	6.97299	11.5607	21.4967	7.28543	7.03704	-0.390664	-2.62393	-4.95545	0.187509	-3.08755	-6.61441
MA0115.1	NR1H2::RXRA	2340	560	106	2764	367	45	17.4328	12.93	20.4239	28.0268	12.2089	16.6667	-0.234404	-2.29741	-4.69878	0.00584511	-2.90706	-5.93484
MA1480.1	DPRX	1415	354	62	2152	251	19	10.5416	8.17363	11.9461	21.8211	8.34997	7.03704	-0.425395	-2.42438	-4.93778	0.179481	-2.92044	-6.64405
MA0731.1	BCL6B	2573	670	132	2944	445	43	19.1686	15.4699	25.4335	29.852	14.8037	15.9259	-0.228586	-2.1698	-4.51343	-0.0342598	-2.76016	-6.13156
MA1570.1	TFAP4(var.2)	757	172	52	1672	119	13	5.63957	3.97137	10.0193	16.954	3.95875	4.81481	-0.741601	-2.87949	-4.60531	0.401609	-3.41093	-6.60531
MA0807.1	TBX5	2441	734	126	2914	505	43	18.1852	16.9476	24.2775	29.5478	16.7997	15.9259	-0.280623	-2.01424	-4.5566	-0.0250947	-2.55374	-6.10762
MA0019.1	Ddit3::Cebpa	1508	384	86	2206	265	28	11.2344	8.86631	16.5703	22.3687	8.8157	10.3704	-0.404588	-2.37805	-4.53674	0.144209	-2.91316	-6.15565
MA0485.2	HOXC9	1371	293	80	2088	206	15	10.2138	6.76518	15.4143	21.1722	6.85296	5.55556	-0.41521	-2.64147	-4.51429	0.191683	-3.14972	-6.92933
MA1562.1	SOX14	1524	365	81	2219	246	27	11.3536	8.42761	15.6069	22.5005	8.18363	10	-0.391084	-2.45298	-4.62488	0.150963	-3.02222	-6.20984
MA1646.1	OSR2	3624	1086	180	3772	724	93	26.9984	25.075	34.6821	38.2478	24.0852	34.4444	-0.189458	-1.92802	-4.52097	-0.131712	-2.51298	-5.47367
MA0843.1	TEF	1187	225	56	1968	150	13	8.84303	5.19511	10.79	19.9554	4.99002	4.81481	-0.465751	-2.86507	-4.8715	0.263659	-3.45004	-6.97842
MA0728.1	Nr2f6(var.2)	2850	643	127	3115	454	37	21.2322	14.8465	24.4701	31.5859	15.1031	13.7037	-0.173057	-2.32113	-4.66112	-0.044787	-2.82325	-6.44035
MA0461.2	Atoh1	809	199	43	1747	136	17	6.02697	4.59478	8.28516	17.7145	4.52428	6.2963	-0.722526	-2.7459	-4.95626	0.388142	-3.29506	-6.29506
MA0669.1	NEUROG2	908	190	56	1793	121	15	6.76451	4.38698	10.79	18.1809	4.02528	5.55556	-0.630824	-2.88752	-4.65002	0.350787	-3.53851	-6.55048
MA1621.1	Rbpjl	2593	822	121	3083	526	55	19.3176	18.9795	23.3141	31.2614	17.4983	20.3704	-0.284332	-1.94174	-4.70588	-0.0346196	-2.58582	-5.84338
MA1101.2	BACH2	1076	276	53	1947	204	10	8.01609	6.37266	10.2119	19.7424	6.78643	3.7037	-0.571685	-2.53462	-4.91523	0.28389	-2.97072	-7.32122
MA0092.1	Hand1::Tcf3	2348	571	143	2774	383	37	17.4924	13.184	27.553	28.1282	12.7412	13.7037	-0.245889	-2.28576	-4.28323	-0.00535328	-2.8619	-6.23365
MA0498.2	MEIS1	1788	531	108	2462	369	34	13.3204	12.2604	20.8092	24.9645	12.2754	12.5926	-0.383534	-2.1351	-4.43278	0.0779502	-2.66019	-6.1002
MA0895.1	HMBOX1	1534	280	65	2214	197	16	11.4281	6.46502	12.5241	22.4498	6.55356	5.92593	-0.348201	-2.802	-4.90892	0.181155	-3.30923	-6.93128
MA0607.1	Bhlha15	1010	327	86	1919	218	22	7.5244	7.55022	16.5703	19.4585	7.25216	8.14815	-0.658698	-2.28569	-4.21257	0.267302	-2.87065	-6.17941
MA0841.1	NFE2	1164	327	68	2030	239	10	8.67168	7.55022	13.1021	20.5841	7.95077	3.7037	-0.556832	-2.38856	-4.65424	0.245557	-2.84084	-7.41978
MA1620.1	Ptf1a(var.3)	2505	805	123	3039	516	57	18.662	18.5869	23.6994	30.8153	17.1657	21.1111	-0.301742	-1.93949	-4.64982	-0.0229561	-2.58111	-5.75945
MA0891.1	GSC2	1862	457	103	2489	311	34	13.8717	10.5518	19.8459	25.2383	10.346	12.5926	-0.331505	-2.35809	-4.50764	0.0872082	-2.91337	-6.10668
MA0141.3	ESRRB	2200	561	121	2730	366	38	16.3898	12.9531	23.3141	27.682	12.1756	14.0741	-0.283353	-2.25478	-4.46778	0.0280448	-2.87094	-6.13871
MA1524.1	MSGN1	1095	256	73	1956	167	18	8.15764	5.91088	14.0655	19.8337	5.55556	6.66667	-0.558434	-2.65515	-4.46532	0.278542	-3.27144	-6.48522
MA0671.1	NFIX	1662	478	104	2388	328	33	12.3817	11.0367	20.0385	24.2142	10.9115	12.2222	-0.411056	-2.20889	-4.40932	0.111826	-2.75221	-6.06537
MA0909.2	HOXD13	2427	533	124	2849	368	40	18.0809	12.3066	23.8921	28.8887	12.2422	14.8148	-0.221929	-2.4089	-4.51269	0.00935266	-2.94333	-6.14496
MA0505.1	Nr5a2	2906	800	167	3248	533	64	21.6494	18.4715	32.1773	32.9345	17.7312	23.7037	-0.225386	-2.08635	-4.3465	-0.0648694	-2.67221	-5.73021
MA1567.1	TBX6	1782	471	101	2465	322	26	13.2757	10.8751	19.4605	24.9949	10.7119	9.62963	-0.367578	-2.28728	-4.50865	0.100513	-2.83594	-6.46642
MA0678.1	OLIG2	788	184	44	1779	122	14	5.87052	4.24844	8.47784	18.0389	4.05855	5.18519	-0.758922	-2.85741	-4.92154	0.415877	-3.45024	-6.57362
MA0755.1	CUX2	960	237	62	1895	153	14	7.1519	5.47218	11.9461	19.2152	5.08982	5.18519	-0.648418	-2.66656	-4.60111	0.332674	-3.29792	-6.74795
MA1114.1	PBX3	2960	878	142	3360	591	67	22.0517	20.2725	27.3603	34.0702	19.6607	24.8148	-0.242524	-1.99583	-4.62416	-0.05966	-2.56689	-5.70782
MA0889.1	GBX1	1369	354	90	2187	211	33	10.1989	8.17363	17.341	22.176	7.01929	12.2222	-0.479219	-2.43052	-4.40627	0.196612	-3.17703	-5.85373
MA0801.1	MGA	1738	515	96	2494	345	27	12.9479	11.891	18.4971	25.289	11.477	10	-0.410814	-2.1656	-4.58906	0.110219	-2.74357	-6.41914
MA0463.2	BCL6	2613	671	120	3079	473	41	19.4666	15.493	23.1214	31.2208	15.7352	15.1852	-0.243296	-2.20462	-4.6879	-0.00654089	-2.70909	-6.23724
MA0719.1	RHOXF1	1425	339	85	2231	230	24	10.6161	7.82729	16.3776	22.6222	7.65136	8.88889	-0.449948	-2.52155	-4.5173	0.19678	-3.0812	-6.34173
MA1532.1	NR1D2	2013	491	130	2630	325	31	14.9966	11.3369	25.0482	26.668	10.8117	11.4815	-0.319153	-2.35471	-4.27192	0.0665621	-2.94999	-6.34009
MA0071.1	RORA	1951	436	113	2584	297	32	14.5348	10.067	21.7726	26.2016	9.88024	11.8519	-0.314091	-2.47591	-4.42391	0.0913009	-3.02977	-6.24409
MA1592.1	ZNF274	2279	646	127	2886	422	48	16.9783	14.9157	24.4701	29.2638	14.0386	17.7778	-0.313917	-2.13271	-4.47942	0.026753	-2.747	-5.88314
MA1563.1	SOX18	1574	411	73	2392	294	29	11.7261	9.48973	14.0655	24.2547	9.78044	10.7407	-0.431711	-2.36894	-4.86211	0.172071	-2.85226	-6.19395
MA0486.2	HSF1	2234	579	124	2828	396	34	16.6431	13.3687	23.8921	28.6757	13.1737	12.5926	-0.300033	-2.24803	-4.47125	0.0401203	-2.79609	-6.33798
MA0666.1	MSX1	1490	388	93	2314	240	36	11.1004	8.95867	17.9191	23.4638	7.98403	13.3333	-0.456324	-2.39751	-4.45826	0.178752	-3.09053	-5.8275
MA0770.1	HSF2	2479	621	133	2990	418	39	18.4683	14.3385	25.6262	30.3184	13.9055	14.4444	-0.260193	-2.25729	-4.48045	0.0101941	-2.82838	-6.25033
MA1144.1	FOSL2::JUND	1281	334	71	2184	243	17	9.54332	7.71184	13.6802	22.1456	8.08383	6.2963	-0.527404	-2.46675	-4.70071	0.242298	-2.92565	-6.763
MA0635.1	BARHL2	1761	394	92	2479	270	24	13.1193	9.09721	17.7264	25.1369	8.98204	8.88889	-0.356566	-2.51669	-4.61518	0.136797	-3.06193	-6.55378
MA0754.1	CUX1	1012	258	66	1992	168	16	7.5393	5.95705	12.7168	20.1987	5.58882	5.92593	-0.649787	-2.62155	-4.58839	0.327221	-3.24046	-6.63278
MA1506.1	HOXD10	1713	374	94	2445	271	30	12.7617	8.63542	18.1118	24.7921	9.0153	11.1111	-0.365581	-2.561	-4.5533	0.147728	-3.02574	-6.201
MA0797.1	TGIF2	1366	411	88	2272	273	25	10.1766	9.48973	16.9557	23.0379	9.08184	9.25926	-0.530969	-2.26372	-4.48728	0.203037	-2.85395	-6.30285
MA0592.3	ESRRA	2426	681	139	3000	449	52	18.0735	15.7239	26.7823	30.4198	14.9368	19.2593	-0.296694	-2.12955	-4.42212	0.00968875	-2.73049	-5.84062
MA1501.1	HOXB7	1520	379	90	2345	252	35	11.3238	8.75087	17.341	23.7781	8.38323	12.963	-0.443969	-2.44777	-4.52197	0.181548	-3.03654	-5.88454
MA1616.1	Prdm15	4229	1195	216	4282	790	92	31.5056	27.5918	41.6185	43.4192	26.2808	34.0741	-0.162656	-1.98596	-4.45387	-0.144687	-2.58305	-5.68519
MA0640.2	ELF3	6121	1622	265	5603	1134	93	45.6008	37.4509	51.0597	56.814	37.7246	34.4444	-0.085275	-2.00127	-4.61498	-0.212843	-2.51762	-6.12567
MA1135.1	FOSB::JUNB	1259	335	73	2200	245	17	9.37942	7.73493	14.0655	22.3078	8.15037	6.2963	-0.551278	-2.46132	-4.65952	0.253948	-2.9127	-6.76188
MA1110.1	NR1H4	1658	401	89	2460	275	33	12.3519	9.25883	17.1484	24.9442	9.14837	12.2222	-0.407038	-2.45481	-4.62653	0.162176	-2.99898	-6.05787
MA1134.1	FOS::JUNB	1253	332	70	2205	241	18	9.33472	7.66567	13.4875	22.3585	8.0173	6.66667	-0.555556	-2.47169	-4.71744	0.259837	-2.93384	-6.6768
MA0729.1	RARA	2542	549	123	3044	357	38	18.9376	12.6761	23.6994	30.866	11.8762	14.0741	-0.232079	-2.44316	-4.60131	0.0279255	-3.06405	-6.2959
MA0063.2	NKX2-5	2133	450	84	2789	316	28	15.8906	10.3902	16.185	28.2803	10.5123	10.3704	-0.287301	-2.53219	-4.95365	0.0995631	-3.04219	-6.53861
MA0827.1	OLIG3	926	222	56	1979	149	20	6.89861	5.12584	10.79	20.0669	4.95675	7.40741	-0.713644	-2.7741	-4.76116	0.382043	-3.34934	-6.24658
MA0766.2	GATA5	1369	354	91	2283	220	36	10.1989	8.17363	17.5337	23.1495	7.3187	13.3333	-0.513787	-2.46509	-4.4249	0.224022	-3.15133	-5.76277
MA0857.1	Rarb	2918	711	146	3348	475	42	21.7388	16.4165	28.131	33.9485	15.8017	15.5556	-0.219846	-2.2569	-4.54079	-0.0215266	-2.83883	-6.33829
MA0796.1	TGIF1	1340	389	90	2294	250	29	9.98287	8.98176	17.341	23.261	8.3167	10.7407	-0.550299	-2.33469	-4.44646	0.225333	-2.97253	-6.08034
MA0708.1	MSX2	1578	393	93	2434	240	39	11.7559	9.07412	17.9191	24.6806	7.98403	14.4444	-0.443528	-2.44902	-4.52825	0.181704	-3.16052	-5.78201
MA0802.1	TBR1	2083	536	108	2798	369	33	15.5181	12.3759	20.8092	28.3715	12.2754	12.2222	-0.339653	-2.29801	-4.60921	0.0860803	-2.83662	-6.31971
MA0099.3	FOS::JUN	1339	356	67	2300	261	19	9.97542	8.21981	12.9094	23.3218	8.68263	7.03704	-0.533375	-2.44458	-4.85423	0.247102	-2.89241	-6.67239
MA0688.1	TBX2	2056	564	109	2803	390	32	15.317	13.0224	21.0019	28.4222	12.9741	11.8519	-0.360302	-2.22638	-4.59774	0.0868294	-2.7586	-6.36593
MA0612.2	EMX1	1331	334	88	2272	195	40	9.91582	7.71184	16.9557	23.0379	6.48703	14.8148	-0.528819	-2.52341	-4.44768	0.242633	-3.29978	-5.58519
MA0062.3	GABPA	5541	1355	227	5194	960	80	41.2799	31.2861	43.738	52.6668	31.9361	29.6296	-0.0847738	-2.11663	-4.69416	-0.178074	-2.61381	-6.19878
MA0783.1	PKNOX2	1726	532	91	2625	343	37	12.8585	12.2835	17.5337	26.6173	11.4105	13.7037	-0.459315	-2.15725	-4.70474	0.14557	-2.79047	-6.00308
MA0027.2	EN1	1416	350	89	2340	209	37	10.5491	8.08127	17.1484	23.7274	6.95276	13.7037	-0.499191	-2.51559	-4.49106	0.225497	-3.25944	-5.75734
MA0655.1	JDP2	1110	272	61	2144	198	15	8.26939	6.2803	11.7534	21.74	6.58683	5.55556	-0.624559	-2.65344	-4.81017	0.325186	-3.11155	-6.83401
MA1645.1	NKX2-2	2432	601	132	3048	407	34	18.1182	13.8767	25.4335	30.9065	13.5396	12.5926	-0.285488	-2.30219	-4.48902	0.0402317	-2.86453	-6.44595
MA0689.1	TBX20	2344	615	123	3021	414	48	17.4626	14.2	23.6994	30.6327	13.7725	17.7778	-0.312887	-2.2432	-4.56513	0.0531664	-2.81416	-5.92268
MA0467.1	Crx	2280	588	118	2979	389	44	16.9858	13.5765	22.736	30.2069	12.9408	16.2963	-0.319829	-2.27498	-4.592	0.0659648	-2.87102	-6.01522
MA1608.1	Isl1	1414	318	105	2330	200	31	10.5342	7.34242	20.2312	23.626	6.65336	11.4815	-0.491568	-2.64425	-4.24289	0.22898	-3.31328	-6.00294
MA0690.1	TBX21	2141	552	109	2899	377	33	15.9502	12.7453	21.0019	29.3957	12.5416	12.2222	-0.345271	-2.30082	-4.64116	0.0919991	-2.85092	-6.36495
MA0670.1	NFIA	1618	534	117	2577	349	36	12.0539	12.3297	22.5434	26.1306	11.6101	13.3333	-0.514924	-2.11422	-4.30456	0.156557	-2.72784	-6.00499
MA1141.1	FOS::JUND	1520	392	72	2482	287	23	11.3238	9.05103	13.8728	25.1673	9.54757	8.51852	-0.487253	-2.4424	-4.88718	0.220179	-2.8922	-6.53355
MA1580.1	ZBTB32	1542	298	78	2439	207	20	11.4877	6.88063	15.0289	24.7313	6.88623	7.40741	-0.430874	-2.80229	-4.73606	0.230613	-3.32797	-6.69953
MA0808.1	TEAD3	1788	441	113	2636	304	26	13.3204	10.1824	21.7726	26.7289	10.1131	9.62963	-0.409561	-2.42906	-4.39351	0.150443	-2.96576	-6.51325
MA0870.1	Sox1	1499	330	83	2435	218	30	11.1674	7.61949	15.9923	24.6907	7.25216	11.1111	-0.468361	-2.65182	-4.64311	0.23156	-3.24996	-6.11125
MA1547.1	PITX2	2361	464	101	3004	319	34	17.5892	10.7135	19.4605	30.4604	10.6121	12.5926	-0.260975	-2.60818	-4.80795	0.0865115	-3.14874	-6.37869
MA1633.1	BACH1	1960	520	115	2795	366	35	14.6018	12.0065	22.158	28.3411	12.1756	12.963	-0.391773	-2.30604	-4.48292	0.120222	-2.81271	-6.19913
MA1130.1	FOSL2::JUN	1398	366	68	2424	266	21	10.415	8.4507	13.1021	24.5792	8.84897	7.77778	-0.538475	-2.47192	-4.90016	0.25555	-2.93234	-6.59531
MA1505.1	HOXC8	1338	324	88	2346	202	34	9.96797	7.48095	16.9557	23.7883	6.71989	12.5926	-0.546479	-2.59249	-4.47291	0.263646	-3.27413	-5.84488
MA0633.1	Twist2	761	225	67	1977	158	15	5.66937	5.19511	12.9094	20.0466	5.25615	5.55556	-0.925691	-2.68366	-4.43135	0.451654	-3.19366	-6.59055
MA0091.1	TAL1::TCF3	1597	437	93	2571	281	28	11.8975	10.09	17.9191	26.0698	9.34797	10.3704	-0.489024	-2.35868	-4.59101	0.197942	-2.99575	-6.32282
MA0161.2	NFIC	2199	686	140	3024	460	46	16.3823	15.8393	26.975	30.6632	15.3027	17.037	-0.39219	-2.07276	-4.36554	0.0674203	-2.64933	-5.97126
MA0724.1	VENTX	1451	339	89	2436	215	35	10.8098	7.82729	17.1484	24.7009	7.15236	12.963	-0.504654	-2.60234	-4.53175	0.242812	-3.25929	-5.8782
MA1118.1	SIX1	2378	619	116	3115	435	47	17.7159	14.2923	22.3507	31.5859	14.4711	17.4074	-0.321361	-2.2631	-4.67891	0.068122	-2.77202	-5.98231
MA1495.1	HOXA1	1249	312	91	2308	184	37	9.30492	7.20388	17.5337	23.403	6.12109	13.7037	-0.597068	-2.59822	-4.37583	0.288802	-3.36006	-5.67417
MA0132.2	PDX1	1418	364	92	2451	221	43	10.564	8.40453	17.7264	24.853	7.35196	15.9259	-0.541184	-2.50303	-4.48726	0.248329	-3.22292	-5.58456
MA0709.1	Msx3	1647	410	101	2603	248	42	12.27	9.46664	19.4605	26.3942	8.25017	15.5556	-0.463765	-2.46991	-4.49118	0.19657	-3.19519	-5.75707
MA0886.1	EMX2	1382	341	101	2411	198	40	10.2958	7.87347	19.4605	24.4474	6.58683	14.8148	-0.547946	-2.56686	-4.32228	0.254928	-3.35113	-5.65856
MA1138.1	FOSL2::JUNB	1357	347	75	2427	254	20	10.1095	8.01201	14.4509	24.6096	8.44977	7.40741	-0.564369	-2.53178	-4.74176	0.274384	-2.98189	-6.64865
MA1126.1	FOS::JUN(var.2)	1911	349	83	2747	237	23	14.2368	8.05819	15.9923	27.8544	7.88423	8.51852	-0.345679	-2.79871	-4.87075	0.17785	-3.35705	-6.72223
MA0800.1	EOMES	2119	529	113	2949	361	33	15.7863	12.2143	21.7726	29.9027	12.0093	12.2222	-0.362448	-2.36449	-4.59144	0.114394	-2.91576	-6.36722
MA0849.1	FOXO6	1882	427	100	2773	306	29	14.0207	9.85915	19.2678	28.118	10.1796	10.7407	-0.393584	-2.53354	-4.62778	0.165597	-3.01425	-6.41365
MA1500.1	HOXB6	1562	379	91	2576	253	38	11.6367	8.75087	17.5337	26.1205	8.4165	14.0741	-0.493087	-2.53621	-4.59447	0.228651	-3.11927	-5.85434
MA0598.3	EHF	5798	1361	246	5473	959	77	43.1945	31.4246	47.3988	55.4958	31.9029	28.5185	-0.0836225	-2.17451	-4.64245	-0.166846	-2.67958	-6.31818
MA0081.2	SPIB	6958	1967	320	6436	1361	119	51.8364	45.4168	61.657	65.2606	45.2761	44.0741	-0.104614	-1.92729	-4.54714	-0.217123	-2.45862	-5.97425
MA0038.2	GFI1	2743	679	136	3403	442	44	20.4351	15.6777	26.2042	34.5062	14.7039	16.2963	-0.275881	-2.29015	-4.60996	0.0351714	-2.90952	-6.23799
MA0887.1	EVX1	1278	324	95	2381	190	33	9.52097	7.48095	18.3044	24.1432	6.32069	12.2222	-0.606315	-2.58614	-4.35613	0.291365	-3.35613	-5.88159
MA0726.1	VSX2	1549	386	103	2580	233	35	11.5399	8.91249	19.8459	26.161	7.75116	12.963	-0.508272	-2.51294	-4.41889	0.227762	-3.24121	-5.97611
MA0900.2	HOXA2	1404	359	101	2485	216	39	10.4597	8.28908	19.4605	25.1977	7.18563	14.4444	-0.563482	-2.53097	-4.3606	0.260221	-3.26392	-5.73341
MA0701.2	LHX9	1520	381	100	2570	234	35	11.3238	8.79704	19.2678	26.0596	7.78443	12.963	-0.52078	-2.51699	-4.44678	0.236917	-3.22027	-5.96135
MA1150.1	RORB	1679	370	113	2651	253	28	12.5084	8.54306	21.7726	26.881	8.4165	10.3704	-0.451675	-2.63368	-4.34488	0.207259	-3.18207	-6.35771
MA1111.1	NR2F2	2498	602	135	3244	407	35	18.6098	13.8998	26.0116	32.8939	13.5396	12.963	-0.307339	-2.36028	-4.51708	0.0696615	-2.92501	-6.46461
MA0912.2	HOXD3	1464	394	94	2560	251	37	10.9067	9.09721	18.1118	25.9582	8.34997	13.7037	-0.556193	-2.44984	-4.5173	0.250036	-3.10035	-5.86244
MA0492.1	JUND(var.2)	2228	468	105	3044	331	34	16.5984	10.8058	20.2312	30.866	11.0113	12.5926	-0.323795	-2.57496	-4.73108	0.126424	-3.07464	-6.35787
MA0876.1	BSX	1768	439	112	2752	272	42	13.1714	10.1362	21.58	27.9051	9.04857	15.5556	-0.452493	-2.46232	-4.43304	0.185869	-3.15293	-5.84808
MA0077.1	SOX9	1739	429	107	2740	301	29	12.9554	9.90533	20.6166	27.7834	10.0133	10.7407	-0.460333	-2.47954	-4.48291	0.195585	-2.99076	-6.36639
MA1128.1	FOSL1::JUN	1577	407	77	2663	295	24	11.7485	9.39737	14.8362	27.0026	9.81371	8.88889	-0.515167	-2.46925	-4.87135	0.240702	-2.93356	-6.55317
MA1577.1	TLX2	1611	401	96	2663	244	40	12.0018	9.25883	18.4971	27.0026	8.1171	14.8148	-0.498676	-2.50496	-4.56745	0.22642	-3.22168	-5.83049
MA0907.1	HOXC13	2169	510	130	3025	357	34	16.1588	11.7756	25.0482	30.6733	11.8762	12.5926	-0.359797	-2.44826	-4.42024	0.120109	-2.96283	-6.35515
MA0658.1	LHX6	1284	322	107	2424	193	28	9.56567	7.43477	20.6166	24.5792	6.42049	10.3704	-0.620281	-2.61579	-4.20524	0.296464	-3.35425	-6.13936
MA0888.1	EVX2	1310	332	104	2454	203	33	9.75937	7.66567	20.0385	24.8834	6.75316	12.2222	-0.613164	-2.59348	-4.26808	0.292405	-3.30318	-5.92412
MA0761.2	ETV1	5463	1334	253	5320	945	75	40.6988	30.8012	48.7476	53.9444	31.4371	27.7778	-0.111421	-2.14536	-4.54391	-0.149689	-2.64273	-6.29808
MA1525.1	NFATC4	3265	851	160	3847	602	59	24.3239	19.649	30.8285	39.0083	20.0266	21.8519	-0.247271	-2.18712	-4.59821	-0.01062	-2.68652	-6.0375
MA0693.2	VDR	2073	577	99	3053	395	32	15.4436	13.3226	19.0751	30.9572	13.1404	11.8519	-0.417171	-2.26225	-4.80532	0.141336	-2.80897	-6.43468
MA1151.1	RORC	1758	403	99	2769	262	28	13.0969	9.30501	19.0751	28.0775	8.7159	10.3704	-0.448678	-2.57376	-4.59904	0.206752	-3.19497	-6.42104
MA0476.1	FOS	1570	419	77	2702	307	22	11.6963	9.67444	14.8362	27.3981	10.2129	8.14815	-0.534961	-2.4407	-4.88472	0.248302	-2.88941	-6.69208
MA0488.1	JUN	2456	512	119	3235	356	40	18.297	11.8218	22.9287	32.8027	11.843	14.8148	-0.296412	-2.55851	-4.66369	0.101043	-3.08277	-6.23658
MA0629.1	Rhox11	2129	483	103	3047	312	32	15.8608	11.1522	19.8459	30.8964	10.3792	11.8519	-0.368735	-2.50882	-4.73819	0.148479	-3.13929	-6.4247
MA0744.2	SCRT2	2210	638	130	3164	411	50	16.4643	14.731	25.0482	32.0827	13.6727	18.5185	-0.407003	-2.19942	-4.49447	0.1107	-2.83384	-5.87298
MA0075.3	PRRX2	1539	383	104	2656	227	43	11.4654	8.84322	20.0385	26.9317	7.55156	15.9259	-0.537473	-2.54405	-4.42481	0.249789	-3.2987	-5.69899
MA0743.2	SCRT1	2137	604	129	3112	397	47	15.9204	13.946	24.8555	31.5555	13.2069	17.4074	-0.417382	-2.24035	-4.46753	0.124873	-2.84576	-5.92416
MA0125.1	Nobox	1641	402	117	2716	245	41	12.2253	9.28192	22.5434	27.5401	8.15037	15.1852	-0.503464	-2.53277	-4.31346	0.223444	-3.24719	-5.82627
MA0478.1	FOSL2	1746	449	107	2818	310	27	13.0075	10.3671	20.6166	28.5743	10.3127	10	-0.484431	-2.4437	-4.5128	0.206187	-2.97814	-6.49938
MA1541.1	NR6A1	2461	702	147	3347	483	53	18.3342	16.2087	28.3237	33.9383	16.0679	19.6296	-0.367969	-2.17767	-4.43333	0.0756552	-2.71712	-5.90508
MA1534.1	NR1I3	2034	563	114	3055	385	41	15.1531	12.9993	21.9653	30.9775	12.8077	15.1852	-0.435592	-2.28871	-4.59281	0.15126	-2.83698	-6.06814
MA0906.1	HOXC12	1791	393	109	2822	275	29	13.3428	9.07412	21.0019	28.6149	9.14837	10.7407	-0.44631	-2.63447	-4.48468	0.209643	-3.14957	-6.39488
MA0890.1	GBX2	1700	424	113	2783	259	41	12.6648	9.78989	21.7726	28.2194	8.6161	15.1852	-0.494494	-2.49789	-4.40563	0.216612	-3.209	-5.86826
MA0651.1	HOXC11	1748	372	96	2799	252	26	13.0224	8.58924	18.4971	28.3817	8.38323	9.62963	-0.452886	-2.68522	-4.63941	0.226321	-3.2471	-6.52394
MA0150.2	Nfe2l2	1832	479	101	2907	334	37	13.6482	11.0598	19.4605	29.4768	11.1111	13.7037	-0.470077	-2.4054	-4.65107	0.196035	-2.92558	-6.09983
MA0893.2	GSX2	1618	436	104	2760	275	42	12.0539	10.067	20.0385	27.9862	9.14837	15.5556	-0.536201	-2.42801	-4.49576	0.234255	-3.09291	-5.80388
MA0752.1	ZNF410	1584	395	107	2715	271	27	11.8006	9.1203	20.6166	27.5299	9.0153	10	-0.532104	-2.53575	-4.41999	0.245276	-3.07931	-6.40657
MA0782.2	PKNOX1	2660	768	143	3528	504	53	19.8167	17.7326	27.553	35.7737	16.7665	19.6296	-0.348531	-2.14078	-4.56587	0.0588936	-2.74846	-5.99782
MA0661.1	MEOX1	1549	397	104	2702	239	40	11.5399	9.16647	20.0385	27.3981	7.95077	14.8148	-0.549539	-2.51367	-4.44622	0.253152	-3.24579	-5.82473
MA0875.1	BARX1	1825	397	100	2873	248	40	13.5961	9.16647	19.2678	29.132	8.25017	14.8148	-0.441568	-2.64225	-4.63139	0.213093	-3.32105	-5.95332
MA0072.1	RORA(var.2)	1941	445	119	2950	300	33	14.4603	10.2748	22.9287	29.9128	9.98004	12.2222	-0.42312	-2.54804	-4.45089	0.180795	-3.11689	-6.30131
MA0716.1	PRRX1	1641	401	101	2770	245	39	12.2253	9.25883	19.4605	28.0876	8.15037	14.4444	-0.51437	-2.54727	-4.53652	0.240941	-3.25809	-5.90933
MA0654.1	ISX	1640	401	101	2770	245	39	12.2178	9.25883	19.4605	28.0876	8.15037	14.4444	-0.514956	-2.54698	-4.53622	0.241234	-3.2578	-5.90903
MA0720.1	Shox2	1640	401	101	2771	245	39	12.2178	9.25883	19.4605	28.0977	8.15037	14.4444	-0.51525	-2.54727	-4.53652	0.241461	-3.25809	-5.90933
MA0717.1	RAX2	1640	401	101	2771	245	39	12.2178	9.25883	19.4605	28.0977	8.15037	14.4444	-0.51525	-2.54727	-4.53652	0.241461	-3.25809	-5.90933
MA1418.1	IRF3	5552	1430	249	5518	996	104	41.3618	33.0178	47.9769	55.9521	33.1337	38.5185	-0.131646	-2.08864	-4.61044	-0.140508	-2.61044	-5.87
MA0721.1	UNCX	1613	384	103	2750	237	36	12.0167	8.86631	19.8459	27.8848	7.88423	13.3333	-0.520579	-2.59115	-4.48961	0.249106	-3.28737	-6.00619
MA0051.1	IRF2	3973	1016	190	4415	746	53	29.5985	23.4588	36.6089	44.7678	24.817	19.6296	-0.204245	-2.17157	-4.5904	-0.0520602	-2.61723	-6.43234
MA0484.2	HNF4G	2842	759	161	3633	505	58	21.1726	17.5248	31.0212	36.8384	16.7997	21.4815	-0.311985	-2.21672	-4.45376	0.04227	-2.80454	-5.92669
MA0477.2	FOSL1	1493	385	77	2713	283	21	11.1227	8.8894	14.8362	27.5096	9.4145	7.77778	-0.576932	-2.53222	-4.85414	0.284743	-2.97627	-6.72861
MA1519.1	LHX5	1532	384	99	2718	237	43	11.4132	8.86631	19.0751	27.5603	7.88423	15.9259	-0.55968	-2.55592	-4.51152	0.267449	-3.25214	-5.71462
MA0519.1	Stat5a::Stat5b	3993	1010	190	4436	678	65	29.7474	23.3202	36.6089	44.9807	22.5549	24.0741	-0.202254	-2.18537	-4.59566	-0.0504678	-2.76037	-6.14314
MA0702.2	LMX1A	1513	377	98	2712	232	39	11.2717	8.70469	18.8825	27.4995	7.7179	14.4444	-0.56759	-2.57237	-4.51608	0.274355	-3.27281	-5.84538
MA0842.2	NRL	1807	424	86	2934	295	31	13.462	9.78989	16.5703	29.7506	9.81371	11.4815	-0.471337	-2.5628	-4.86445	0.227935	-3.08615	-6.33652
MA0037.3	GATA3	1659	391	98	2819	248	36	12.3594	9.02794	18.8825	28.5845	8.25017	13.3333	-0.514402	-2.59948	-4.59579	0.250468	-3.2563	-6.04058
MA1622.1	Smad2::Smad3	1522	401	81	2772	290	22	11.3387	9.25883	15.6069	28.1079	9.64737	8.14815	-0.582176	-2.50647	-4.81408	0.282783	-2.97402	-6.6945
MA1108.2	MXI1	1202	362	105	2559	244	24	8.95478	8.35835	20.2312	25.9481	8.1171	8.88889	-0.74688	-2.47825	-4.26386	0.343264	-3.04736	-6.39314
MA1109.1	NEUROD1	2104	675	142	3235	432	51	15.6746	15.5853	27.3603	32.8027	14.3713	18.8889	-0.4812	-2.12138	-4.37037	0.139431	-2.76523	-5.84769
MA0137.3	STAT1	3998	1018	194	4496	709	64	29.7847	23.505	37.3796	45.5891	23.5862	23.7037	-0.21194	-2.18548	-4.57709	-0.042576	-2.70736	-6.177
MA0114.4	HNF4A	2876	757	164	3722	508	59	21.4259	17.4786	31.5992	37.7408	16.8995	21.8519	-0.318818	-2.24452	-4.45111	0.0531961	-2.81998	-5.92602
MA0684.2	RUNX3	2488	614	140	3451	408	53	18.5353	14.1769	26.975	34.9929	13.5729	19.6296	-0.360008	-2.37868	-4.5115	0.11202	-2.96835	-5.91286
MA0883.1	Dmbx1	2106	480	109	3181	318	34	15.6895	11.0829	21.0019	32.2551	10.5788	12.5926	-0.41267	-2.54607	-4.68478	0.182305	-3.14008	-6.3655
MA0653.1	IRF9	3933	966	162	4494	721	46	29.3005	22.3043	31.2139	45.5689	23.9854	17.037	-0.212967	-2.2385	-4.81453	-0.0205969	-2.66053	-6.63082
MA0911.1	Hoxa11	1790	399	114	2959	272	26	13.3353	9.21265	21.9653	30.0041	9.04857	9.62963	-0.487993	-2.65349	-4.46085	0.237157	-3.20627	-6.5933
MA1476.1	DLX5	1704	411	103	2928	265	43	12.6946	9.48973	19.8459	29.6897	8.8157	15.9259	-0.526867	-2.57858	-4.57508	0.254123	-3.21173	-5.83531
MA0631.1	Six3	1271	253	52	2641	173	24	9.46882	5.84161	10.0193	26.7796	5.75516	8.88889	-0.662594	-2.99135	-5.2739	0.392526	-3.53971	-6.38938
MA1481.1	DRGX	1776	432	112	2981	272	38	13.231	9.9746	21.58	30.2271	9.04857	14.0741	-0.509974	-2.5495	-4.49704	0.237191	-3.21693	-6.05646
MA0087.1	Sox5	1973	436	96	3126	304	32	14.6987	10.067	18.4971	31.6974	10.1131	11.8519	-0.445341	-2.62333	-4.80655	0.218585	-3.14359	-6.39152
MA0630.1	SHOX	1760	421	106	2985	258	44	13.1118	9.72062	20.4239	30.2677	8.58283	16.2963	-0.515116	-2.5788	-4.56856	0.247039	-3.28525	-5.83704
MA1632.1	ATF2	2410	481	138	3371	348	34	17.9543	11.106	26.5896	34.1817	11.5768	12.5926	-0.34138	-2.6663	-4.46767	0.142764	-3.13325	-6.48873
MA0157.2	FOXO3	2758	636	137	3667	456	45	20.5468	14.6848	26.3969	37.1831	15.1697	16.6667	-0.316315	-2.43284	-4.64769	0.094663	-2.91283	-6.25387
MA0704.1	Lhx4	1498	371	98	2816	226	34	11.1599	8.56615	18.8825	28.554	7.5183	12.5926	-0.607219	-2.62077	-4.54133	0.30339	-3.33586	-6.06858
MA0699.1	LBX2	1764	442	115	3000	276	41	13.1416	10.2055	22.158	30.4198	9.18164	15.1852	-0.525188	-2.52192	-4.46433	0.240924	-3.2013	-5.95227
MA0618.1	LBX1	1782	487	116	3044	307	42	13.2757	11.2445	22.3507	30.866	10.2129	15.5556	-0.53953	-2.41103	-4.48083	0.232941	-3.07672	-5.94649
MA1105.2	GRHL2	2479	614	130	3513	405	40	18.4683	14.1769	25.0482	35.6216	13.4731	14.8148	-0.374475	-2.38792	-4.62765	0.12847	-2.98824	-6.32809
MA0489.1	JUN(var.2)	1851	451	96	3091	328	31	13.7898	10.4133	18.4971	31.3425	10.9115	11.4815	-0.50058	-2.53769	-4.76971	0.239189	-2.99712	-6.40047
MA0494.1	Nr1h3::Rxra	2422	543	143	3432	364	40	18.0437	12.5375	27.553	34.8002	12.1091	14.8148	-0.365433	-2.52261	-4.44754	0.137418	-3.09962	-6.28549
MA0491.2	JUND	1432	367	71	2824	269	19	10.6683	8.47379	13.6802	28.6352	8.94877	7.03704	-0.645128	-2.60931	-4.9792	0.334581	-3.05748	-6.88102
MA1579.1	ZBTB26	3723	1103	206	4460	738	75	27.736	25.4676	39.6917	45.2241	24.5509	27.7778	-0.282588	-2.03762	-4.45834	-0.0220096	-2.61736	-5.91602
MA0462.2	BATF::JUN	1662	443	87	2989	330	22	12.3817	10.2286	16.763	30.3083	10.978	8.14815	-0.572651	-2.48019	-4.82841	0.274091	-2.90503	-6.81192
MA1634.1	BATF	1642	431	85	2979	326	24	12.2327	9.95151	16.3776	30.2069	10.845	8.88889	-0.577813	-2.50751	-4.84966	0.281561	-2.91032	-6.67409
MA1497.1	HOXA6	1831	456	104	3094	300	48	13.6408	10.5287	20.0385	31.3729	9.98004	17.7778	-0.515201	-2.52073	-4.65318	0.24164	-3.1248	-5.76865
MA0144.2	STAT3	4479	1195	226	4955	831	77	33.3681	27.5918	43.5453	50.2434	27.6447	28.5185	-0.209452	-2.11562	-4.51823	-0.0637439	-2.63971	-6.07163
MA0867.2	SOX4	3989	1006	172	4619	712	66	29.7176	23.2279	33.1407	46.8363	23.686	24.4444	-0.227033	-2.21443	-4.76258	-0.0154799	-2.71311	-6.14445
MA0628.1	POU6F1	1480	362	113	2837	218	35	11.0259	8.35835	21.7726	28.767	7.25216	12.963	-0.627372	-2.65891	-4.33857	0.311397	-3.39057	-6.02947
MA0712.2	OTX2	2653	551	124	3624	384	39	19.7646	12.7222	23.8921	36.7471	12.7745	14.4444	-0.322145	-2.58965	-4.74136	0.127814	-3.11059	-6.41015
MA0508.3	PRDM1	5674	1702	281	5907	1151	131	42.2707	39.2981	54.1426	59.8966	38.2901	48.5185	-0.189686	-1.92682	-4.52541	-0.131626	-2.49116	-5.62641
MA0881.1	Dlx4	1788	434	125	3053	269	44	13.3204	10.0208	24.0848	30.9572	8.94877	16.2963	-0.526954	-2.56953	-4.3653	0.244927	-3.25962	-5.87165
MA0848.1	FOXO4	2467	566	119	3534	401	38	18.3789	13.0686	22.9287	35.8345	13.34	14.0741	-0.370727	-2.49461	-4.74445	0.147818	-2.99181	-6.39134
MA0042.2	FOXI1	2467	566	119	3534	401	38	18.3789	13.0686	22.9287	35.8345	13.34	14.0741	-0.370727	-2.49461	-4.74445	0.147818	-2.99181	-6.39134
MA1657.1	ZNF652	3047	725	145	3941	489	53	22.6998	16.7398	27.9383	39.9615	16.2675	19.6296	-0.299114	-2.37045	-4.69238	0.0720584	-2.9386	-6.14437
MA1642.1	NEUROG2(var.2)	1943	586	141	3222	378	48	14.4752	13.5304	27.1676	32.6709	12.5749	17.7778	-0.532813	-2.26213	-4.31733	0.196858	-2.89464	-5.87192
MA1148.1	PPARA::RXRA	3140	805	177	4015	552	48	23.3927	18.5869	34.104	40.7118	18.3633	17.7778	-0.306074	-2.26978	-4.45502	0.0485618	-2.8141	-6.33766
MA1137.1	FOSL1::JUNB	1500	354	82	2888	257	21	11.1748	8.17363	15.7996	29.2841	8.54957	7.77778	-0.617609	-2.70075	-4.8108	0.3275	-3.16273	-6.77604
MA1121.1	TEAD2	2648	658	162	3658	451	51	19.7273	15.1928	31.2139	37.0919	15.0033	18.8889	-0.360531	-2.36927	-4.39137	0.105621	-2.91423	-6.05879
MA0442.2	SOX10	3545	951	194	4328	668	63	26.4099	21.958	37.3796	43.8856	22.2222	23.3333	-0.279363	-2.17763	-4.47102	0.00855181	-2.68723	-6.09365
MA0644.1	ESX1	1826	446	127	3097	276	46	13.6035	10.2979	24.4701	31.4034	9.18164	17.037	-0.522036	-2.55561	-4.36782	0.240148	-3.24798	-5.83295
MA0078.1	Sox17	1694	436	110	3033	303	29	12.6201	10.067	21.1946	30.7544	10.0798	10.7407	-0.570531	-2.52857	-4.51539	0.26978	-3.05358	-6.43877
MA0894.1	HESX1	1820	454	113	3115	284	50	13.5588	10.4826	21.7726	31.5859	9.44777	18.5185	-0.528359	-2.53153	-4.5379	0.246935	-3.20833	-5.71423
MA0002.2	RUNX1	2887	790	169	3883	533	61	21.5079	18.2406	32.5626	39.3734	17.7312	22.5926	-0.353052	-2.2227	-4.44753	0.0745488	-2.79042	-5.91767
MA0518.1	Stat4	4221	1076	205	4802	756	73	31.446	24.8441	39.499	48.6919	25.1497	27.037	-0.219889	-2.1918	-4.58378	-0.0338384	-2.70102	-6.07343
MA0882.1	DLX6	1936	462	135	3177	284	49	14.423	10.6673	26.0116	32.2146	9.44777	18.1481	-0.492753	-2.55987	-4.3348	0.221833	-3.26187	-5.79691
MA1142.1	FOSL1::JUND	1602	377	84	2995	271	21	11.9347	8.70469	16.185	30.3691	9.0153	7.77778	-0.591034	-2.67827	-4.84438	0.311648	-3.15454	-6.84438
MA0152.1	NFATC2	4654	1289	249	5152	902	87	34.6718	29.7622	47.9769	52.2409	30.0067	32.2222	-0.217728	-2.06995	-4.44198	-0.0710661	-2.585	-5.95904
MA0662.1	MIXL1	1884	460	120	3180	288	44	14.0356	10.6211	23.1214	32.245	9.58084	16.2963	-0.51526	-2.54935	-4.48795	0.239968	-3.22492	-5.93541
MA0703.2	LMX1B	2023	455	128	3252	275	46	15.0711	10.5057	24.6628	32.9751	9.14837	17.037	-0.466253	-2.61881	-4.44853	0.218578	-3.34525	-5.92497
MA0885.1	Dlx2	1793	433	125	3114	267	47	13.3577	9.99769	24.0848	31.5757	8.88224	17.4074	-0.540187	-2.59012	-4.38256	0.256206	-3.28765	-5.79376
MA0687.1	SPIC	4668	1176	209	5152	816	86	34.7761	27.1531	40.2697	52.2409	27.1457	31.8519	-0.195607	-2.18452	-4.67684	-0.0532793	-2.71177	-5.95793
MA0610.1	DMRT3	1329	282	73	2814	180	27	9.90092	6.5112	14.0655	28.5338	5.98802	10	-0.691284	-2.92786	-4.87758	0.390997	-3.57556	-6.31252
MA0070.1	PBX1	2020	434	96	3286	296	26	15.0488	10.0208	18.4971	33.3198	9.84697	9.62963	-0.462966	-2.68155	-4.85814	0.239011	-3.23365	-6.74267
MA0090.3	TEAD1	2557	658	161	3668	437	37	19.0494	15.1928	31.0212	37.1933	14.5376	13.7037	-0.394284	-2.35258	-4.3836	0.126258	-2.94303	-6.50507
MA1120.1	SOX13	1883	486	115	3221	332	37	14.0282	11.2214	22.158	32.6607	11.0446	13.7037	-0.531535	-2.48554	-4.56486	0.242941	-3.03531	-6.2009
MA1638.1	HAND2	1952	558	148	3272	355	47	14.5422	12.8839	28.5164	33.1779	11.8097	17.4074	-0.53542	-2.34204	-4.2567	0.209799	-2.99448	-5.91157
MA0496.3	MAFK	2557	606	139	3680	414	43	19.0494	13.9921	26.7823	37.3149	13.7725	15.9259	-0.381529	-2.45859	-4.58282	0.143724	-3.00828	-6.2755
MA1496.1	HOXA4	1637	387	95	3071	241	40	12.1955	8.93558	18.3044	31.1397	8.0173	14.8148	-0.597021	-2.67767	-4.704	0.310633	-3.36097	-5.95193
MA0880.1	Dlx3	1976	476	139	3278	296	49	14.721	10.9905	26.7823	33.2387	9.84697	18.1481	-0.502873	-2.55642	-4.3323	0.22736	-3.24179	-5.83653
MA0490.2	JUNB	1514	387	76	3021	287	22	11.2791	8.93558	14.6435	30.6327	9.54757	8.14815	-0.655327	-2.62329	-4.97155	0.341334	-3.05457	-6.76004
MA0501.1	MAF::NFE2	1900	460	115	3251	333	35	14.1548	10.6211	22.158	32.9649	11.0778	12.963	-0.523869	-2.57016	-4.57016	0.251015	-3.03627	-6.28637
MA0723.1	VAX2	1767	463	109	3189	290	40	13.164	10.6904	21.0019	32.3362	9.64737	14.8148	-0.577797	-2.51001	-4.5967	0.274005	-3.18497	-6.04295
MA0725.1	VSX1	1753	427	130	3141	256	43	13.0597	9.85915	25.0482	31.8495	8.5163	15.9259	-0.569036	-2.60655	-4.32228	0.272362	-3.34465	-5.91838
MA1625.1	Stat5b	4286	1025	204	4900	696	75	31.9303	23.6666	39.3064	49.6857	23.1537	27.7778	-0.2133	-2.27731	-4.60629	-0.0201504	-2.83577	-6.0499
MA0718.1	RAX	2019	485	124	3341	300	52	15.0413	11.1983	23.8921	33.8775	9.98004	19.2593	-0.49619	-2.55377	-4.52142	0.23045	-3.2468	-5.77518
MA0780.1	PAX3	1689	362	98	3111	246	30	12.5829	8.35835	18.8825	31.5453	8.18363	11.1111	-0.571235	-2.79334	-4.67848	0.309974	-3.35067	-6.3863
MA0698.1	ZBTB18	2401	698	148	3676	456	50	17.8872	16.1164	28.5164	37.2744	15.1697	18.5185	-0.460103	-2.24244	-4.48007	0.154398	-2.85663	-6.04567
MA0853.1	Alx4	2032	465	121	3365	285	43	15.1382	10.7366	23.3141	34.1209	9.48104	15.9259	-0.49031	-2.61791	-4.56013	0.237396	-3.32418	-6.05273
MA0515.1	Sox6	3950	998	190	4740	699	68	29.4271	23.0432	36.6089	48.0633	23.2535	25.1852	-0.254707	-2.23945	-4.63249	0.00832691	-2.7532	-6.11488
MA1123.2	TWIST1	2055	578	144	3441	363	50	15.3095	13.3456	27.7457	34.8915	12.0758	18.5185	-0.529653	-2.35965	-4.36465	0.214036	-3.03075	-5.89072
MA0650.2	HOXA13	2674	615	147	3825	416	42	19.921	14.2	28.3237	38.7852	13.839	15.5556	-0.37351	-2.49385	-4.55862	0.14295	-3.05785	-6.36598
MA0514.1	Sox3	5397	1483	260	5812	1005	110	40.2071	34.2415	50.0963	58.9333	33.4331	40.7407	-0.195286	-2.05893	-4.57086	-0.0884095	-2.62025	-5.81187
MA1489.1	FOXN3	2659	601	149	3831	415	44	19.8093	13.8767	28.7091	38.8461	13.8057	16.2963	-0.377447	-2.52289	-4.53495	0.14939	-3.05715	-6.29468
MA1624.1	Stat5a	3781	906	190	4632	615	57	28.1681	20.919	36.6089	46.9682	20.4591	21.1111	-0.262867	-2.32405	-4.57756	0.0300004	-2.88298	-6.31453
MA0117.2	Mafb	2050	518	112	3474	357	35	15.2723	11.9603	21.58	35.2261	11.8762	12.963	-0.518242	-2.50284	-4.71229	0.242732	-3.03987	-6.39037
MA0479.1	FOXH1	2478	615	152	3742	411	45	18.4609	14.2	29.2871	37.9436	13.6727	16.6667	-0.427838	-2.43836	-4.45487	0.166795	-3.0198	-6.21095
MA0483.1	Gfi1b	3414	859	165	4426	565	62	25.434	19.8338	31.7919	44.8793	18.7957	22.963	-0.308836	-2.29957	-4.67976	0.0657044	-2.90398	-6.09189
MA1594.1	ZNF382	2284	540	118	3632	342	38	17.0156	12.4683	22.736	36.8282	11.3772	14.0741	-0.45755	-2.53808	-4.73225	0.211652	-3.19704	-6.36697
MA0769.2	TCF7	2815	754	167	4025	506	61	20.9715	17.4094	32.1773	40.8132	16.833	22.5926	-0.395449	-2.29595	-4.47066	0.120405	-2.87137	-5.92363
MA1463.1	ARGFX	2016	476	122	3442	300	44	15.019	10.9905	23.5067	34.9016	9.98004	16.2963	-0.519211	-2.60167	-4.56575	0.252541	-3.26767	-6.03706
MA0680.1	PAX7	1786	397	109	3279	261	36	13.3055	9.16647	21.0019	33.2488	8.68263	13.3333	-0.573545	-2.74307	-4.60788	0.302978	-3.34816	-6.20614
MA0625.1	NFATC3	4009	1041	187	4878	736	70	29.8666	24.036	36.0308	49.4626	24.4844	25.9259	-0.267523	-2.2128	-4.68966	0.0155242	-2.71299	-6.10727
MA1530.1	NKX6-3	1816	443	113	3326	294	38	13.529	10.2286	21.7726	33.7254	9.78044	14.0741	-0.582033	-2.61742	-4.5884	0.290991	-3.20891	-6.16065
MA1647.1	PRDM4	3717	950	181	4666	649	51	27.6913	21.9349	34.8748	47.3129	21.5902	18.8889	-0.288255	-2.25639	-4.64833	0.0397931	-2.8061	-6.47575
MA0624.1	NFATC1	3795	999	183	4743	707	69	28.2724	23.0663	35.2601	48.0937	23.5196	25.5556	-0.289198	-2.21474	-4.66338	0.0325024	-2.71352	-6.07056
MA0896.1	Hmx1	2466	585	138	3770	379	53	18.3715	13.5073	26.5896	38.2275	12.6081	19.6296	-0.429048	-2.50471	-4.58848	0.183343	-3.13095	-5.96909
MA0835.2	BATF3	1848	473	102	3385	341	27	13.7674	10.9213	19.6532	34.3237	11.344	10	-0.584418	-2.55047	-4.76374	0.288773	-3.02254	-6.68128
MA0089.2	NFE2L1	1881	492	107	3415	351	37	14.0133	11.36	20.6166	34.6279	11.6766	13.7037	-0.580333	-2.5151	-4.71615	0.280053	-3.00229	-6.24816
MA0122.3	Nkx3-2	2593	556	114	3867	379	46	19.3176	12.8377	21.9653	39.2111	12.6081	17.037	-0.391621	-2.61309	-4.89914	0.184972	-3.16597	-6.20847
MA0722.1	VAX1	1891	484	132	3401	296	47	14.0878	11.1752	25.4335	34.4859	9.84697	17.4074	-0.575862	-2.54193	-4.4164	0.270948	-3.25134	-5.90621
MA0905.1	HOXC10	2150	456	123	3548	311	37	16.0173	10.5287	23.6994	35.9765	10.346	13.7037	-0.47808	-2.71531	-4.60569	0.24459	-3.26743	-6.33875
MA0868.2	SOX8	3003	694	147	4175	477	49	22.372	16.024	28.3237	42.3342	15.8683	18.1481	-0.349359	-2.46276	-4.70188	0.126013	-3.0037	-6.28684
MA0874.1	Arx	1894	472	114	3437	301	41	14.1101	10.8982	21.9653	34.8509	10.0133	15.1852	-0.575771	-2.58035	-4.6301	0.283943	-3.22937	-6.10544
MA1507.1	HOXD4	1817	467	123	3392	283	48	13.5365	10.7827	23.6994	34.3946	9.4145	17.7778	-0.606587	-2.56665	-4.49142	0.293991	-3.28927	-5.84897
MA0140.2	GATA1::TAL1	1751	443	114	3350	292	24	13.0448	10.2286	21.9653	33.9688	9.71391	8.88889	-0.624454	-2.60725	-4.56553	0.311528	-3.20859	-6.81346
MA1549.1	POU6F1(var.2)	1755	432	107	3353	272	36	13.0746	9.9746	20.6166	33.9992	9.04857	13.3333	-0.618355	-2.64072	-4.65414	0.315627	-3.30815	-6.22569
MA0706.1	MEOX2	1925	475	126	3468	295	51	14.3411	10.9674	24.2775	35.1653	9.81371	18.8889	-0.571002	-2.58986	-4.50436	0.278244	-3.27707	-5.80922
MA0674.1	NKX6-1	2057	512	137	3558	314	53	15.3244	11.8218	26.3969	36.0779	10.4458	19.6296	-0.538884	-2.54521	-4.44718	0.251641	-3.25059	-5.81729
MA0908.1	HOXD11	2149	458	128	3591	315	34	16.0098	10.5749	24.6628	36.4125	10.479	12.5926	-0.489969	-2.72022	-4.55942	0.250751	-3.26021	-6.47196
MA0854.1	Alx1	2109	480	136	3573	301	44	15.7118	11.0829	26.2042	36.23	10.0133	16.2963	-0.510676	-2.64613	-4.46556	0.249901	-3.3194	-6.09359
MA0018.4	CREB1	2355	556	148	3750	383	38	17.5445	12.8377	28.5164	38.0247	12.7412	14.0741	-0.464057	-2.54663	-4.45612	0.207106	-3.08437	-6.41764
MA0700.2	LHX2	2120	497	144	3585	305	47	15.7938	11.4754	27.7457	36.3517	10.1464	17.4074	-0.514124	-2.60687	-4.39405	0.243784	-3.31131	-6.00938
MA1618.1	Ptf1a	2126	596	160	3639	380	49	15.8385	13.7613	30.8285	36.8992	12.6414	18.1481	-0.549293	-2.38405	-4.28129	0.226108	-3.03336	-5.98851
MA0634.1	ALX3	2135	516	142	3619	328	52	15.9055	11.9141	27.3603	36.6964	10.9115	19.2593	-0.51888	-2.56767	-4.42915	0.242476	-3.22135	-5.87846
MA1478.1	DMRTA2	1750	403	102	3368	272	29	13.0373	9.30501	19.6532	34.1513	9.04857	10.7407	-0.616326	-2.73483	-4.71704	0.328211	-3.302	-6.53148
MA0621.1	mix-a	2195	514	137	3660	330	56	16.3525	11.8679	26.3969	37.1121	10.978	20.7407	-0.499891	-2.59427	-4.50186	0.237732	-3.23357	-5.79254
MA0809.2	TEAD4	2752	708	184	4054	479	44	20.5021	16.3473	35.4528	41.1073	15.9348	16.2963	-0.416344	-2.375	-4.31905	0.142521	-2.93873	-6.38318
MA0517.1	STAT1::STAT2	7127	1920	321	7185	1349	127	53.0954	44.3316	61.8497	72.8554	44.8769	47.037	-0.148067	-2.04026	-4.62072	-0.136374	-2.54947	-5.95846
MA1421.1	TCF7L1	3355	973	182	4565	667	72	24.9944	22.4659	35.0674	46.2888	22.189	26.6667	-0.367926	-2.15373	-4.57223	0.076376	-2.69848	-5.9101
MA1112.2	NR4A1	3378	818	193	4477	553	56	25.1658	18.8871	37.1869	45.3965	18.3965	20.7407	-0.324455	-2.37045	-4.45395	0.0819078	-2.93527	-6.23905
MA0903.1	HOXB3	2249	553	143	3719	351	49	16.7548	12.7684	27.553	37.7104	11.6766	18.1481	-0.499446	-2.52338	-4.47464	0.226185	-3.17919	-6.0198
MA0031.1	FOXD1	2908	673	150	4172	472	42	21.6643	15.5391	28.9017	42.3038	15.7019	15.5556	-0.374714	-2.48606	-4.65171	0.145998	-2.99788	-6.48821
MA0675.1	NKX6-2	2071	526	142	3611	325	51	15.4287	12.145	27.3603	36.6153	10.8117	18.8889	-0.54877	-2.52596	-4.41513	0.253301	-3.22059	-5.89246
MA1508.1	IKZF1	5805	1525	290	6245	1054	98	43.2467	35.2113	55.8767	63.3239	35.0632	36.2963	-0.188421	-2.11691	-4.51159	-0.0830153	-2.64984	-6.07679
MA0710.1	NOTO	2262	588	143	3775	375	50	16.8517	13.5765	27.553	38.2782	12.475	18.5185	-0.513472	-2.45718	-4.49698	0.225406	-3.10611	-6.013
MA0143.4	SOX2	2067	516	129	3633	353	39	15.3989	11.9141	24.8555	36.8384	11.7432	14.4444	-0.550423	-2.55252	-4.55252	0.2632	-3.10022	-6.27834
MA0878.2	CDX1	2275	529	153	3765	361	32	16.9485	12.2143	29.4798	38.1768	12.0093	11.8519	-0.495365	-2.59989	-4.38963	0.231418	-3.15116	-6.64702
MA1499.1	HOXB4	1908	487	123	3559	303	48	14.2144	11.2445	23.6994	36.088	10.0798	17.7778	-0.603639	-2.57371	-4.55897	0.295771	-3.25831	-5.91652
MA0836.2	CEBPD	2314	558	128	3839	373	38	17.2391	12.8839	24.6628	38.9272	12.4085	14.0741	-0.495738	-2.54779	-4.67191	0.234604	-3.12888	-6.42398
MA0892.1	GSX1	2153	522	150	3702	322	48	16.0396	12.0526	28.9017	37.538	10.7119	17.7778	-0.532413	-2.57664	-4.37573	0.249544	-3.27363	-6.01958
MA1593.1	ZNF317	2704	762	168	4190	502	56	20.1445	17.5941	32.3699	42.4863	16.6999	20.7407	-0.465152	-2.29238	-4.47371	0.166703	-2.89449	-6.05868
MA0772.1	IRF7	5591	1384	229	6186	980	89	41.6524	31.9557	44.1233	62.7256	32.6015	32.963	-0.192319	-2.20658	-4.80201	-0.0464184	-2.70457	-6.16548
MA1479.1	DMRTC2	1905	421	103	3607	280	31	14.1921	9.72062	19.8459	36.5747	9.3147	11.4815	-0.596143	-2.77404	-4.80522	0.324865	-3.36244	-6.53752
MA1504.1	HOXC4	2028	513	133	3708	313	50	15.1084	11.8448	25.6262	37.5989	10.4125	18.5185	-0.586292	-2.56932	-4.51685	0.284291	-3.28212	-5.92828
MA0043.3	HLF	2109	489	120	3776	323	37	15.7118	11.2907	23.1214	38.2884	10.7452	13.7037	-0.554889	-2.66354	-4.69034	0.28541	-3.26184	-6.38778
MA0614.1	Foxj2	3618	842	167	4851	606	60	26.9537	19.4412	32.1773	49.1888	20.1597	22.2222	-0.321731	-2.42503	-4.759	0.101358	-2.89953	-6.23582
MA1124.1	ZNF24	3569	917	166	4877	625	65	26.5887	21.1729	31.9846	49.4524	20.7917	24.0741	-0.349146	-2.30967	-4.77541	0.101328	-2.86274	-6.12808
MA0676.1	Nr2e1	2891	702	149	4377	464	50	21.5377	16.2087	28.7091	44.3825	15.4358	18.5185	-0.422075	-2.4641	-4.70026	0.176299	-3.06145	-6.27557
MA1473.1	CDX4	2864	654	173	4310	452	37	21.3365	15.1004	33.3333	43.7031	15.0366	13.7037	-0.41449	-2.54516	-4.46368	0.175166	-3.07813	-6.68885
MA1119.1	SIX2	2978	753	166	4450	524	59	22.1858	17.3863	31.9846	45.1227	17.4318	21.8519	-0.419255	-2.40288	-4.58434	0.160206	-2.92596	-6.07674
MA0080.5	SPI1	7855	2210	380	7942	1512	145	58.519	51.0275	73.2177	80.5313	50.2994	53.7037	-0.159344	-1.98891	-4.52888	-0.143453	-2.5365	-5.91883
MA0884.1	DUXA	2314	555	133	3989	370	44	17.2391	12.8146	25.6262	40.4482	12.3087	16.2963	-0.527451	-2.58728	-4.64834	0.258187	-3.17224	-6.24419
MA1487.1	FOXE1	3316	947	190	4749	625	69	24.7039	21.8656	36.6089	48.1545	20.7917	25.5556	-0.404845	-2.21285	-4.53022	0.113335	-2.81236	-5.99155
MA0036.3	GATA2	2401	572	138	4051	349	58	17.8872	13.2071	26.5896	41.0769	11.6101	21.4815	-0.509068	-2.57862	-4.62996	0.245574	-3.2914	-5.88051
MA0866.1	SOX21	2170	474	130	3876	318	41	16.1663	10.9444	25.0482	39.3024	10.5788	15.1852	-0.548	-2.74274	-4.60911	0.288873	-3.3186	-6.27393
MA0050.2	IRF1	7921	2139	353	7999	1496	147	59.0107	49.3881	68.0154	81.1093	49.7671	54.4444	-0.149233	-2.03798	-4.63718	-0.135096	-2.55381	-5.90103
MA0793.1	POU6F2	2097	529	130	3877	336	47	15.6224	12.2143	25.0482	39.3125	11.1776	17.4074	-0.593676	-2.58066	-4.60542	0.292938	-3.23547	-6.0732
MA0030.1	FOXF2	3398	812	184	4776	566	59	25.3148	18.7486	35.4528	48.4283	18.829	21.8519	-0.364577	-2.42971	-4.57149	0.12654	-2.95039	-6.2124
MA0480.1	Foxo1	4378	1103	211	5500	774	78	32.6157	25.4676	40.6551	55.7696	25.7485	28.8889	-0.286465	-2.2753	-4.66142	0.0426945	-2.78633	-6.09712
MA0151.1	Arid3a	3341	798	174	4753	528	69	24.8901	18.4253	33.526	48.1951	17.5649	25.5556	-0.372527	-2.43835	-4.63565	0.136031	-3.0342	-5.97007
MA0108.2	TBP	3086	908	184	4660	612	79	22.9904	20.9651	35.4528	47.2521	20.3593	29.2593	-0.450323	-2.2153	-4.51828	0.144269	-2.78446	-5.73806
MA1603.1	Dmrt1	2638	577	142	4254	385	41	19.6528	13.3226	27.3603	43.1353	12.8077	15.1852	-0.460983	-2.65378	-4.67646	0.228393	-3.2375	-6.46866
MA1588.1	ZNF136	2943	661	153	4476	452	31	21.9251	15.2621	29.4798	45.3863	15.0366	11.4815	-0.416472	-2.57104	-4.68216	0.188451	-3.11936	-6.98535
MA0033.2	FOXL1	3305	802	179	4748	563	60	24.6219	18.5177	34.4894	48.1444	18.7292	22.2222	-0.383056	-2.42603	-4.58967	0.139614	-2.9365	-6.1666
MA0850.1	FOXP3	3305	803	179	4749	564	60	24.6219	18.5408	34.4894	48.1545	18.7625	22.2222	-0.383375	-2.42455	-4.58999	0.139598	-2.93426	-6.16692
MA0789.1	POU3F4	2539	656	143	4254	411	55	18.9153	15.1466	27.553	43.1353	13.6727	20.3704	-0.512561	-2.46505	-4.66273	0.231999	-3.13961	-6.04125
MA0619.1	LIN54	3940	903	190	5172	615	62	29.3526	20.8497	36.6089	52.4437	20.4591	22.963	-0.30535	-2.43075	-4.67947	0.0871768	-2.98489	-6.29513
MA0035.4	GATA1	2216	545	112	4058	360	43	16.509	12.5837	21.58	41.1478	11.976	15.9259	-0.577447	-2.60108	-4.88383	0.295364	-3.19934	-6.26492
MA0913.2	HOXD9	3142	752	173	4672	518	57	23.4076	17.3632	33.3333	47.3738	17.2322	21.1111	-0.408126	-2.471	-4.59097	0.164231	-3.00879	-6.1927
MA0833.2	ATF4	2229	488	128	4033	321	41	16.6058	11.2676	24.6628	40.8943	10.6786	15.1852	-0.557934	-2.74938	-4.68011	0.297523	-3.35369	-6.32256
MA0869.1	Sox11	2664	598	144	4356	404	44	19.8465	13.8074	27.7457	44.1695	13.4398	16.2963	-0.475176	-2.63055	-4.68463	0.234234	-3.19634	-6.39512
MA0897.1	Hmx2	3191	743	156	4740	492	54	23.7726	17.1554	30.0578	48.0633	16.3673	20	-0.400746	-2.50332	-4.75514	0.170132	-3.09802	-6.28565
MA0756.1	ONECUT2	2763	661	156	4442	439	48	20.5841	15.2621	30.0578	45.0416	14.6041	17.7778	-0.470068	-2.53358	-4.61669	0.214906	-3.12401	-6.31712
MA1623.1	Stat2	7873	2060	350	8062	1436	140	58.6531	47.5641	67.4374	81.7481	47.7711	51.8519	-0.152743	-2.08701	-4.64423	-0.118518	-2.6076	-5.96616
MA0613.1	FOXG1	3535	838	187	5000	584	61	26.3354	19.3489	36.0308	50.6997	19.4278	22.5926	-0.367642	-2.44433	-4.60824	0.132576	-2.96531	-6.2244
MA0852.2	FOXK1	3995	1004	210	5369	704	71	29.7623	23.1817	40.4624	54.4413	23.4198	26.2963	-0.337141	-2.32958	-4.58687	0.0893172	-2.84169	-6.15137
MA0879.1	Dlx1	2828	591	166	4500	393	55	21.0683	13.6458	31.9846	45.6297	13.0739	20.3704	-0.447807	-2.70636	-4.53833	0.222336	-3.29499	-6.13201
MA0468.1	DUX4	2544	624	149	4371	412	46	18.9525	14.4078	28.7091	44.3216	13.7059	17.037	-0.527851	-2.55533	-4.62157	0.253014	-3.15423	-6.31717
MA0040.1	Foxq1	3500	768	171	4994	529	56	26.0746	17.7326	32.948	50.6388	17.5981	20.7407	-0.362703	-2.55088	-4.71799	0.150138	-3.08872	-6.32849
MA0707.1	MNX1	3012	721	167	4689	465	62	22.4391	16.6474	32.1773	47.5461	15.4691	22.963	-0.44411	-2.50676	-4.61691	0.194449	-3.13953	-6.04642
MA0520.1	Stat6	3653	888	185	5159	616	60	27.2145	20.5033	35.6455	52.3119	20.4923	22.2222	-0.3685	-2.40895	-4.67198	0.129509	-2.93658	-6.29648
MA0153.2	HNF1B	2838	634	158	4563	415	53	21.1428	14.6387	30.4432	46.2685	13.8057	19.6296	-0.461858	-2.62418	-4.62874	0.22325	-3.23555	-6.2046
MA1103.2	FOXK2	3573	850	179	5111	605	53	26.6185	19.626	34.4894	51.8252	20.1264	19.6296	-0.375122	-2.44672	-4.69423	0.141347	-2.93725	-6.45012
MA0029.1	Mecom	2827	708	173	4603	451	58	21.0609	16.3473	33.3333	46.6741	15.0033	21.4815	-0.488091	-2.48554	-4.51852	0.215211	-3.13616	-6.09517
MA1125.1	ZNF384	6575	1581	277	7211	1104	113	48.9831	36.5043	53.3719	73.119	36.7265	41.8519	-0.182888	-2.23904	-4.75192	-0.0496794	-2.75714	-6.04548
MA1683.1	FOXA3	3581	843	168	5138	594	53	26.6781	19.4643	32.3699	52.099	19.7605	19.6296	-0.374418	-2.46118	-4.78825	0.146426	-2.96625	-6.45264
MA0482.2	GATA4	3267	896	193	4963	582	84	24.3388	20.6881	37.1869	50.3245	19.3613	31.1111	-0.44455	-2.31095	-4.52584	0.158696	-2.93343	-5.72598
MA0593.1	FOXP2	4815	1219	228	6033	855	87	35.8713	28.1459	43.9306	61.1742	28.4431	32.2222	-0.284805	-2.26664	-4.68524	0.0405346	-2.77834	-6.07518
MA0898.1	Hmx3	3361	791	178	5015	520	62	25.0391	18.2637	34.2967	50.8518	17.2987	22.963	-0.407645	-2.49479	-4.64659	0.169714	-3.09995	-6.16812
MA1606.1	Foxf1	3572	837	182	5172	592	58	26.611	19.3258	35.0674	52.4437	19.6939	21.4815	-0.382934	-2.47637	-4.67766	0.151057	-2.976	-6.32747
MA0792.1	POU5F1B	2977	756	169	4793	494	62	22.1784	17.4556	32.5626	48.6007	16.4338	22.963	-0.478668	-2.45607	-4.61743	0.208402	-3.06994	-6.06412
MA0523.1	TCF7L2	3757	1029	220	5368	687	81	27.9893	23.7589	42.3892	54.4311	22.8543	30	-0.39766	-2.266	-4.49167	0.117143	-2.84886	-5.93318
MA0084.1	SRY	3780	864	171	5336	620	58	28.1606	19.9492	32.948	54.1067	20.6254	21.4815	-0.357505	-2.48679	-4.82382	0.139868	-2.96555	-6.38369
MA0481.3	FOXP1	3703	870	186	5287	616	53	27.587	20.0877	35.8382	53.6098	20.4923	19.6296	-0.372196	-2.4618	-4.68752	0.141559	-2.95989	-6.49875
MA1152.1	SOX15	4415	985	204	5793	698	62	32.8913	22.743	39.3064	58.7406	23.2202	22.963	-0.30051	-2.46473	-4.73628	0.0913873	-2.96162	-6.45451
MA0047.3	FOXA2	3424	789	170	5150	563	49	25.5085	18.2175	32.7553	52.2206	18.7292	18.1481	-0.409589	-2.52717	-4.74166	0.179301	-3.01406	-6.53635
MA0606.1	NFAT5	4560	1176	237	5977	806	78	33.9715	27.1531	45.6647	60.6064	26.813	28.8889	-0.322246	-2.27739	-4.58832	0.0681416	-2.82243	-6.19166
MA1639.1	MEIS1(var.2)	2657	628	155	4657	421	48	19.7944	14.5001	29.8651	47.2217	14.0053	17.7778	-0.53993	-2.62089	-4.63939	0.269672	-3.19784	-6.33055
MA0109.1	HLTF	3126	714	166	4972	483	46	23.2884	16.4858	31.9846	50.4157	16.0679	17.037	-0.454418	-2.58474	-4.68948	0.215091	-3.14864	-6.54096
MA0025.2	NFIL3	2695	575	159	4667	382	43	20.0775	13.2764	30.6358	47.3231	12.7079	15.9259	-0.519265	-2.74792	-4.60245	0.272945	-3.33791	-6.48907
MA0102.4	CEBPA	2677	596	149	4692	397	44	19.9434	13.7613	28.7091	47.5766	13.2069	16.2963	-0.532137	-2.69937	-4.69937	0.277449	-3.28554	-6.45911
MA0899.1	HOXA10	3805	909	215	5476	610	68	28.3469	20.9882	41.4258	55.5263	20.2927	25.1852	-0.38365	-2.44919	-4.52914	0.141576	-3.02467	-6.18987
MA0465.2	CDX2	4479	1079	232	5968	729	86	33.3681	24.9134	44.7013	60.5151	24.2515	31.8519	-0.324735	-2.37822	-4.59572	0.0893356	-2.94392	-6.02743
MA0660.1	MEF2B	3473	792	177	5267	534	59	25.8735	18.2868	34.104	53.407	17.7645	21.8519	-0.415481	-2.54809	-4.70984	0.185318	-3.11675	-6.29481
MA0659.2	MAFG	2706	684	161	4773	469	46	20.1594	15.7931	31.0212	48.3979	15.6021	17.037	-0.553456	-2.53755	-4.62449	0.265278	-3.08196	-6.43184
MA0768.1	LEF1	3873	1061	227	5643	709	80	28.8535	24.4978	43.738	57.2196	23.5862	29.6296	-0.412383	-2.28041	-4.50507	0.130628	-2.86198	-6.00969
MA0757.1	ONECUT3	3794	862	191	5523	575	63	28.2649	19.903	36.8015	56.0028	19.1284	23.3333	-0.382965	-2.52093	-4.69504	0.158767	-3.10505	-6.29519
MA1636.1	CEBPG(var.2)	2600	596	133	4762	384	51	19.3697	13.7613	25.6262	48.2864	12.7745	18.8889	-0.570148	-2.69527	-4.85916	0.302908	-3.32948	-6.24202
MA0785.1	POU2F1	3684	859	187	5522	556	64	27.4454	19.8338	36.0308	55.9927	18.4963	23.7037	-0.408902	-2.50944	-4.70906	0.175016	-3.13702	-6.25596
MA0713.1	PHOX2A	2969	694	186	5014	458	56	22.1188	16.024	35.8382	50.8416	15.2362	20.7407	-0.510159	-2.60713	-4.50676	0.245826	-3.20672	-6.23857
MA0847.2	FOXD2	4209	1004	185	5933	679	72	31.3566	23.1817	35.6455	60.1602	22.5882	26.6667	-0.361067	-2.42879	-4.86895	0.134217	-2.99306	-6.2304
MA0601.1	Arid3b	4294	999	222	5949	671	75	31.9899	23.0663	42.7746	60.3224	22.322	27.7778	-0.349058	-2.45282	-4.62275	0.121267	-3.027	-6.18835
MA0041.1	Foxd3	6022	1401	275	7152	966	101	44.8633	32.3482	52.9865	72.5208	32.1357	37.4074	-0.23449	-2.33828	-4.68723	0.0136145	-2.87464	-6.13231
MA0046.2	HNF1A	3716	791	185	5549	530	62	27.6838	18.2637	35.6455	56.2665	17.6314	22.963	-0.394875	-2.62688	-4.72303	0.183602	-3.20456	-6.30021
MA0901.2	HOXB13	6053	1373	289	7158	954	91	45.0942	31.7017	55.684	72.5816	31.7365	33.7037	-0.229315	-2.36963	-4.61782	0.0125916	-2.8949	-6.28495
MA1115.1	POU5F1	4024	964	187	5841	635	76	29.9784	22.2581	36.0308	59.2273	21.1244	28.1481	-0.385239	-2.44676	-4.81276	0.152346	-3.04904	-6.11173
MA0786.1	POU3F1	4048	949	200	5839	625	74	30.1572	21.9118	38.5356	59.2071	20.7917	27.4074	-0.379277	-2.47201	-4.71841	0.149235	-3.07456	-6.15282
MA0148.4	FOXA1	3788	897	182	5680	628	60	28.2202	20.7112	35.0674	57.5948	20.8916	22.2222	-0.409666	-2.48792	-4.78909	0.174789	-3.00227	-6.39
MA1104.2	GATA6	3267	791	174	5327	504	64	24.3388	18.2637	33.526	54.0154	16.7665	23.7037	-0.481234	-2.52745	-4.71204	0.224122	-3.17771	-6.15499
MA0787.1	POU3F2	3729	885	185	5651	576	69	27.7807	20.4341	35.6455	57.3008	19.1617	25.5556	-0.418983	-2.49402	-4.75218	0.180734	-3.11363	-6.17503
MA0627.2	POU2F3	4236	1047	203	6028	683	76	31.5578	24.1746	39.1137	61.1235	22.7212	28.1481	-0.374956	-2.3914	-4.75811	0.134021	-3.0077	-6.17552
MA0851.1	Foxj3	4681	1116	227	6309	784	74	34.873	25.7677	43.738	63.9728	26.0812	27.4074	-0.329976	-2.39846	-4.69603	0.100618	-2.90787	-6.31312
MA0135.1	Lhx3	4245	1004	229	5987	662	74	31.6248	23.1817	44.1233	60.7078	22.0226	27.4074	-0.365741	-2.44575	-4.57809	0.130328	-3.0466	-6.20784
MA1471.1	BARX2	3664	781	193	5574	534	57	27.2964	18.0328	37.1869	56.52	17.7645	21.1111	-0.411115	-2.64114	-4.65786	0.194178	-3.18962	-6.41743
MA0495.3	MAFF	3038	726	176	5206	499	46	22.6328	16.7629	33.9114	52.7885	16.6001	17.037	-0.52236	-2.58744	-4.63183	0.254693	-3.12837	-6.5677
MA0052.4	MEF2A	6274	1491	295	7458	1029	105	46.7407	34.4262	56.8401	75.6236	34.2315	38.8889	-0.238826	-2.31193	-4.64943	0.0105769	-2.84697	-6.13975
MA1607.1	Foxl2	4778	1152	229	6454	808	80	35.5956	26.5989	44.1233	65.4431	26.8796	29.6296	-0.332774	-2.38504	-4.71576	0.101013	-2.89675	-6.23304
MA0507.1	POU2F2	4210	980	202	6053	658	70	31.3641	22.6276	38.921	61.377	21.8896	25.9259	-0.375167	-2.47813	-4.75656	0.148664	-3.05283	-6.28549
MA1113.2	PBX2	3485	829	221	5524	553	57	25.9629	19.1411	42.5819	56.013	18.3965	21.1111	-0.461598	-2.53331	-4.44064	0.202957	-3.1174	-6.39565
MA0846.1	FOXC2	5207	1245	245	6769	874	74	38.7916	28.7462	47.2062	68.6372	29.0752	27.4074	-0.303138	-2.36744	-4.71274	0.0753521	-2.87789	-6.43992
MA0773.1	MEF2D	4076	925	216	5951	644	63	30.3658	21.3577	41.6185	60.3427	21.4238	23.3333	-0.386486	-2.52611	-4.62454	0.159492	-3.04851	-6.40214
MA0715.1	PROP1	3691	836	212	5681	558	69	27.4976	19.3027	40.8478	57.6049	18.5629	25.5556	-0.429613	-2.57205	-4.55149	0.19252	-3.15529	-6.17088
MA0602.1	Arid5a	3760	805	186	5733	529	62	28.0116	18.5869	35.8382	58.1322	17.5981	22.963	-0.411726	-2.6354	-4.74908	0.196832	-3.24112	-6.33405
MA0497.1	MEF2C	5884	1405	287	7236	963	99	43.8352	32.4405	55.2987	73.3725	32.0359	36.6667	-0.264238	-2.33047	-4.62191	0.0341567	-2.87543	-6.15746
MA0788.1	POU3F3	4432	1037	217	6254	687	82	33.018	23.9437	41.8112	63.4151	22.8543	30.3704	-0.362114	-2.45766	-4.71431	0.134707	-3.05169	-6.1183
MA0784.1	POU1F1	4259	1004	209	6152	662	67	31.7291	23.1817	40.2697	62.3809	22.0226	24.8148	-0.380861	-2.46562	-4.7298	0.14968	-3.06647	-6.37107
MA0032.2	FOXC1	4792	1114	229	6527	769	75	35.6999	25.7215	44.1233	66.1833	25.5822	27.7778	-0.334147	-2.43903	-4.72136	0.111645	-2.97372	-6.33174
MA0845.1	FOXB1	4036	969	198	6045	667	74	30.0678	22.3736	38.1503	61.2959	22.189	27.4074	-0.411012	-2.46937	-4.76037	0.171805	-3.00818	-6.18027
MA0142.1	Pou5f1::Sox2	4477	1174	231	6428	808	90	33.3532	27.1069	44.5087	65.1795	26.8796	33.3333	-0.391568	-2.32267	-4.66814	0.13027	-2.86167	-6.02803
MA1640.1	MEIS2(var.2)	3557	835	219	5710	549	63	26.4993	19.2796	42.1965	57.899	18.2635	23.3333	-0.469191	-2.56	-4.49085	0.213639	-3.16497	-6.28836
MA0683.1	POU4F2	3737	885	204	5867	576	69	27.8403	20.4341	39.3064	59.491	19.1617	25.5556	-0.449055	-2.52719	-4.64429	0.201687	-3.1468	-6.2082
MA0679.2	ONECUT1	4204	968	222	6173	651	72	31.3194	22.3505	42.7746	62.5938	21.6567	26.6667	-0.392521	-2.51121	-4.63565	0.161688	-3.08355	-6.26014
MA0790.1	POU4F1	4124	988	209	6163	660	72	30.7234	22.8123	40.2697	62.4924	21.9561	26.6667	-0.40985	-2.47131	-4.71232	0.169738	-3.05336	-6.24975
MA0791.1	POU4F3	4252	1006	216	6257	676	73	31.677	23.2279	41.6185	63.4455	22.4884	27.037	-0.396454	-2.47596	-4.69549	0.160876	-3.0495	-6.26056
MA0681.2	PHOX2B	5161	1185	265	6906	795	90	38.4489	27.3609	51.0597	70.0264	26.4471	33.3333	-0.321394	-2.44416	-4.60498	0.0988061	-3.02002	-6.16298
